# Supplementary material for: Temporospatial variation in the late Mesozoic volcanism in southeast China
Source: Copernicus journal article supplement (doi:10.5194/se-10-2089-2019), 2019-11-22
Supplement: Supplementary file 1 [file se-10-2089-2019-supplement.zip]

Table S1 List of the upper Mesozoic volcanic and pyroclastic rock samples with zircon U-Pb isotope dating data in SE China

| 1                                                                                                              | Sample     | Village /town | Formation / Group (Gr) | Latitude N | Longitude E | Lithology       | 2  | 3  | Age (Ma) | 1σ (Ma) | 4    | MSWD | Prob |
|----------------------------------------------------------------------------------------------------------------|------------|---------------|------------------------|------------|-------------|-----------------|----|----|----------|---------|------|------|------|
| Zhejiang province                                                                                              |            |               |                        |            |             |                 |    |    |          |         |      |      |      |
| <sup>5</sup> L1, Tongjia-Yanxia, Shouchang (A1, A4, A10-11, A14-15 from Li et al., 2019; other from this work) |            |               |                        |            |             |                 |    |    |          |         |      |      |      |
| A1                                                                                                             | 1101-02    | Tongjia       | Lower Laocun           | 292528.5   | 1190952.7   | Trachyte        | 15 | 10 | 138.2    | 2.0     | 1.45 | 1.40 | 0.21 |
| A2                                                                                                             | 0128-02    | Tongjia       | Lower Laocun           | 292439.4   | 1190919.6   | Ignimbrite      | 15 | 15 | 131.4    | 1.4     | 1.07 | 1.17 | 0.30 |
| A3                                                                                                             | 0128-04    | Tongjia       | Laocun                 | 292429.2   | 1190937.2   | Tuff            | 15 | 14 | 134.8    | 2.4     | 1.78 | 1.30 | 0.27 |
| A4                                                                                                             | 1101-03    | Tongjia       | Middle Laocun          | 292431.2   | 1190922.4   | Trachyte        | 15 | 14 | 128.2    | 1.4     | 1.09 | 1.04 | 0.41 |
| A5                                                                                                             | ZC-06      | Zhoucun       | Top Laocun             | 292313.1   | 1191049.9   | Shard tuff      | 16 | 15 | 125.0    | 1.0     | 0.80 | 0.00 | 1.00 |
| A6                                                                                                             | ZC-10      | Zhoucun       | Lower Huangjian        | 292310.2   | 1191052.6   | Ignimbrite      | 15 | 13 | 116.4    | 2.4     | 1.80 | 0.80 | 0.50 |
| A7                                                                                                             | ZC-11      | Zhoucun       | Middle Huangjian       | 292308.6   | 1191054.1   | Ignimbrite      | 15 | 14 | 118.0    | 1.7     | 1.44 | 0.89 | 0.56 |
| A8                                                                                                             | ZC-13      | Zhoucun       | Basal Shouchang        | 292302.5   | 1191059.3   | Ignimbrite      | 19 | 18 | 150.9    | 1.1     | 0.73 | 0.17 | 1.00 |
| A9                                                                                                             | ZC-15      | Zhoucun       | Lower Shouchang        | 292301.9   | 1191100.4   | Tuff            | 15 | 12 | 133.0    | 2.4     | 1.80 | 1.30 | 0.20 |
| A10                                                                                                            | ZC-13B     | Zhoucun       | Basal Huangjiang       | 292253.3   | 1191118.1   | Trachyte        | 15 | 11 | 130.9    | 1.5     | 1.15 | 0.89 | 0.88 |
| A11                                                                                                            | ZC-20      | Zhoucun       | Lower Shouchang        | 292249.4   | 1191122.5   | Tephros         | 15 | 15 | 127.1    | 1.1     | 0.87 | 0.94 | 0.51 |
| A12                                                                                                            | ZC-23      | Yanxia        | Middle Shouchang       | 292246.8   | 1191105.8   | Ignimbrite      | 15 | 15 | 123.8    | 1.0     | 0.81 | 0.15 | 1.00 |
| A13                                                                                                            | ZC-43      | Yanxia        | Middle Hengshan        | 292315.7   | 1191215.5   | Tuff            | 20 | 12 | 120.9    | 1.2     | 0.99 | 0.41 | 0.97 |
| A14                                                                                                            | ZC-27      | Yanxia        | Upper Hengshan         | 292325.0   | 1191218.7   | Tuff            | 15 | 12 | 126.3    | 1.4     | 1.11 | 1.40 | 0.18 |
| A15                                                                                                            | ZC-29      | Yanxia        | Middle Hengshan        | 292256.2   | 1191232.6   | Trachyte        | 15 | 12 | 129.3    | 1.7     | 1.31 | 1.40 | 0.20 |
| L2, Zhongdai, Jinhua (B1, B3, and B5 from Li et al., 2019; B2 and B4 form this work)                           |            |               |                        |            |             |                 |    |    |          |         |      |      |      |
| B1                                                                                                             | 150117-01  | Yangyuan      | Upper Moshishan Gr     | 285923.0   | 1192034.0   | Dacite          | 20 | 10 | 130.8    | 1.4     | 1.1  | 0.9  | 0.54 |
| B2                                                                                                             | 13102-01   | Shangyingtou  | Top Moshishan Gr       | 285928.0   | 1192035.2   | Dacite          | 20 | 12 | 127.0    | 1.7     | 1.3  | 0.7  | 0.72 |
| B3                                                                                                             | 13102-02   | Laoyingtanbei | Top Moshishan Gr       | 290003.6   | 1191958.1   | Ignimbrite      | 15 | 13 | 131.6    | 2.0     | 1.5  | 1.5  | 0.11 |
| B4                                                                                                             | 13102-03   | Laoyingtanbei | Middle Zhongdai        | 290004.8   | 1191957.2   | Tuff            | 15 | 8  | 98.2     | 2.4     | 2.4  | 1.5  | 0.12 |
| B5                                                                                                             | 13102-04   | Laoyingtanbei | Laoyingtanbei          | 290014.1   | 1191934.7   | Ignimbrite      | 20 | 5  | 125.8    | 3.6     | 2.9  | 2.1  | 0.09 |
| L3, Guantou-Fenglin, Yongkang (C7 from Li et al., 2019; the left from this work)                               |            |               |                        |            |             |                 |    |    |          |         |      |      |      |
| C1                                                                                                             | 0126-01    | Houyueling    | Top Moshishan Gr       | 284706.4   | 1200435.0   | Dacitic tuff    | 20 | 17 | 116.8    | 1.1     | 0.94 | 0.94 | 0.52 |
| C2                                                                                                             | 0126-02    | Houyueling    | Top Moshishan Gr       | 284709.6   | 1200437.4   | Shard tuff      | 15 | 13 | 123.1    | 1.2     | 0.97 | 0.30 | 0.99 |
| C3                                                                                                             | 1102-01    | Houyueling    | Middle Guantou         | 284715.9   | 1200450.8   | Shard tuff      | 15 | 13 | 113.1    | 2.2     | 1.95 | 1.20 | 0.29 |
| C4                                                                                                             | 0127-01    | Guantou       | Lower Chaochuan        | 284753.6   | 1200539.4   | Tuff            | 20 | 14 | 117.6    | 1.9     | 1.62 | 1.24 | 0.45 |
| C5                                                                                                             | 0127-10    | Chaochuan     | Lower Chaochuan        | 284815.1   | 1200621.6   | Dacitic tuff    | 15 | 15 | 113.1    | 1.2     | 1.06 | 1.16 | 0.30 |
| C6                                                                                                             | 1102-02    | Chaochuan     | Moshishan Gr           | 285157.6   | 1200436.1   | Dacite Trachyte | 15 | 14 | 124.4    | 1.1     | 0.88 | 1.07 | 0.38 |
| C7                                                                                                             | 1309-11    | Fenglin       | Moshishan Gr           | 284903.9   | 1200712.8   | Trachyandesite  | 20 | 14 | 134.5    | 2.2     | 1.64 | 0.49 | 0.96 |
| L4, Laozhui, Lishui (D3 and D4 from Li et al., 2019; D7 from Ma et al., 2016; and the left from this work)     |            |               |                        |            |             |                 |    |    |          |         |      |      |      |
| D1                                                                                                             | 1103-01    | Xiaqiao       | Top Moshishan          | 283148.7   | 1194517.2   | Trachyte        | 15 | 15 | 119.1    | 2.1     | 1.76 | 1.4  | 0.20 |
| D2                                                                                                             | LZ2-17     | Xiaqiao       | Middle Guantou         | 283237.6   | 1194502.2   | Shard tuff      | 20 | 5  | 115.5    | 1.2     | 1.04 | 1.1  | 0.32 |
| D3                                                                                                             | 1310-01    | NE Taocun     | Moshishan              | 283254.7   | 1194427.7   | Andesite        | 20 | 11 | 122.8    | 1.9     | 1.55 | 1.5  | 0.14 |
| D4                                                                                                             | 150118-02  | Chikeng       | Moshishan              | 283245.6   | 1194500.6   | Ignimbrite      | 20 | 15 | 117.8    | 2.2     | 1.87 | 1.6  | 0.59 |
| D5                                                                                                             | 1103-03    | Xiaqiao       | Top Guantou            | 283215.7   | 1194523.3   | Tuff            | 15 | 14 | 106.9    | 1.7     | 1.59 | 1.5  | 0.17 |
| D6                                                                                                             | ZJ66       | Liufan        | Upper Chaochuan        | Unavaiable |             | Tuff            | 22 | 22 | 118.0    | 1.0     | 0.85 | 1.8  |      |
| D7                                                                                                             | 1103-08    | Chikeng       | Top Guantou            | 283308.8   | 1194557.0   | Trachyte        | 15 | 15 | 109.4    | 1.8     | 1.65 | 0.5  | 0.93 |
| M1, NW Shengzhou basin (Li JH et al., 2014)                                                                    |            |               |                        |            |             |                 |    |    |          |         |      |      |      |
|                                                                                                                | zj28       | Shengzhou     | Moshishan Gr           | 293530.7   | 1203558.6   | Tuff            | 14 | 14 | 129.0    | 2.0     |      | 1.80 |      |
| M2, central Shengzhou basin (zj30 from Li JH et al., 2014; others from Li CL et al., 2014)                     |            |               |                        |            |             |                 |    |    |          |         |      |      |      |
|                                                                                                                | zj30       | Shengzhou     | Guantou                | 292958.7   | 1204818.4   | Tuff            | 13 | 10 | 119.0    | 4.0     |      | 2.90 |      |
|                                                                                                                | DY11-130-1 | W Xinyue      | Shouchang              | 294128.0   | 1203354.0   | Rhyelite        | 20 | 17 | 133.0    | 1.0     |      | 1.20 |      |
|                                                                                                                | DY11-132-1 | W Xinyue      | Hengshan               | 294601.0   | 1203629.0   | Rhyelite        | 20 | 18 | 131.4    | 0.6     |      | 1.50 |      |
|                                                                                                                | DY11-133-1 | W Xinyue      | Lower Jiuliping        | 294606.0   | 1203941.0   | Rhyelite        | 20 | 16 | 131.6    | 1.4     |      | 1.40 |      |
| M3, W Tiantai basin (zj53 from Li JH et al., 2014; another one from Li CL et al., 2014)                        |            |               |                        |            |             |                 |    |    |          |         |      |      |      |
|                                                                                                                | zj53       | Tiantai       | Guantou                | 290910.7   | 1204848.6   | Tuff            | 11 | 9  | 124.0    | 5.0     |      | 0.49 |      |
|                                                                                                                | DY11-10-2  | Tiantai       | Top Jiuliping          | 291510.0   | 1204223.0   | Rhyelite        | 20 | 16 | 128.6    | 0.6     |      | 0.47 |      |
| M4, Jingling, Xinchang (Zhang et al., 2014)                                                                    |            |               |                        |            |             |                 |    |    |          |         |      |      |      |
|                                                                                                                | XC06       | Anxi          | Top Moshishan Gr       | 292326.5   | 1204696.3   | Ignimbrite      | 17 | 12 | 126.0    | 3.0     | 2.38 | 0.18 | 1.00 |
|                                                                                                                | XC07       | Jingling      | Middle Guantou         | 292142.1   | 1204646.3   | Ignimbrite      | 16 | 15 | 117.0    | 2.0     | 1.71 | 0.42 | 0.97 |
|                                                                                                                | FQ03-1     | Anxi          | Middle Guantou         | 292349.9   | 1204641.0   | Bentonite       | 38 | 34 | 116.0    | 2.0     | 1.72 | 0.73 | 0.85 |
|                                                                                                                | 09XC01     | Anxi          | Middle Guantou         | 292349.5   | 1204642.7   | Bentonite       | 29 | 26 | 119.0    | 2.0     | 1.68 | 0.30 | 0.99 |
| M5, Dongyang (Li JH et al., 2014)                                                                              |            |               |                        |            |             |                 |    |    |          |         |      |      |      |
|                                                                                                                | zj31       | Dongyang      | Moshishan Gr           | 291406.83, | 1202156.4   | Tuff            | 14 | 13 | 136.0    | 1.0     |      | 1.30 |      |
| M6, Yucaotou, Yiwu (former four samples from Liu et al., 2012; others from Li CL et al., 2014)                 |            |               |                        |            |             |                 |    |    |          |         |      |      |      |
|                                                                                                                | DS01       | Yucaotou      | Lower Dashuang         | 290700.0   | 1200224.0   | Lithic tuff     | 20 | 19 | 140.3    | 1.0     | 0.71 | 0.64 | 0.86 |
|                                                                                                                | DS02       | Yucaotou      | Mid Dashuang           | 290655.0   | 1200225.0   | Tuff            | 22 | 22 | 137.7    | 1.3     | 0.94 | 1.40 | 0.13 |
|                                                                                                                | DS03       | Yucaotou      | Upper Dashuang         | 290624.0   | 1200238.0   | Lithic tuff     | 20 | 20 | 135.3    | 0.9     | 0.67 | 0.90 | 0.58 |
|                                                                                                                | GW03       | Yucaotou      | Lower Gaowu            | 290601.0   | 1200246.0   | Ignimbrite      | 20 | 20 | 135.4    | 0.9     | 0.66 | 1.00 | 0.46 |
|                                                                                                                | DY11-23-4  | Yiwu          | Lower Chawan           | 291224.0   | 1201542.0   | Dacite          | 20 | 6  | 135.6    | 1.6     | 1.18 | 0.32 |      |
|                                                                                                                | DY11-24-6  | Yiwu          | Upper Gaowu            | 290924.0   | 1202003.0   | Tuff            | 20 | 10 | 140.4    | 1.9     | 1.35 | 0.18 |      |
|                                                                                                                | DY11-146-1 | Yiwu          | Upper Dashuang         | 290756.0   | 1200234.0   | Rhyolite        | 20 | 16 | 145.1    | 1.5     | 1.03 | 0.72 |      |
|                                                                                                                | DY11-152-1 | Yiwu          | Middle Gaowu           | 290524.0   | 1195821.0   | Trachyte        | 20 | 16 | 142.0    | 1.1     | 0.77 | 0.37 |      |
| M7, Puijiang (Liu et al., 2014)                                                                                |            |               |                        |            |             |                 |    |    |          |         |      |      |      |

|                                                                                                                       |           |                  |             |             |                |    |    |       |     |        |      |      |
|-----------------------------------------------------------------------------------------------------------------------|-----------|------------------|-------------|-------------|----------------|----|----|-------|-----|--------|------|------|
| HS01                                                                                                                  | Pujiang   | Upper Hengshan   | 292404.2    | 1195149.7   | Trachydacite   | 20 | 18 | 118.0 | 1.0 | 0.85   | 0.38 | 0.99 |
| HS02                                                                                                                  | Pujiang   | Lower Hengshan   | 292341.1    | 1195145.2   | Trachy basalt  | 11 | 9  | 121.5 | 2.0 | 1.65   | 0.45 | 0.85 |
| HS03                                                                                                                  | Pujiang   | Lower Hengshan   | 292341.1    | 1195145.2   | Trachy basalt  | 20 | 18 | 123.7 | 2.0 | 1.62   | 3.00 | 0.00 |
| SC02                                                                                                                  | Pujiang   | Upper Shouchan   | 293007.5    | 1195704.5   | Tuff           | 20 | 15 | 123.0 | 2.0 | 1.63   | 0.12 | 1.00 |
| HJ07                                                                                                                  | Pujiang   | Lower Huangjian  | 293108.5    | 1195700.7   | Ignimbrite     | 21 | 20 | 130.0 | 1.0 | 0.77   | 0.51 | 0.96 |
| LC04                                                                                                                  | Pujiang   | Middle Laocun    | 293356.3    | 1195455.6   | Ignimbrite     | 24 | 24 | 136.0 | 1.0 | 0.74   | 0.24 | 1.00 |
| M8, W Pujiang (Li JH et al., 2014)                                                                                    |           |                  |             |             |                |    |    |       |     |        |      |      |
| zj36                                                                                                                  | W Pujiang | Moshishan Gr     | 29199.3     | 1193959.7   | Tuff           | 14 | 13 | 130.0 | 1.0 |        | 0.44 |      |
| M9, Jiande Group in Jiande (Samples with letters LC, HJ, and SC from Liu et al., 2014; others from Wang et al., 2016) |           |                  |             |             |                |    |    |       |     |        |      |      |
| SC01                                                                                                                  | Jiande    | Lower Shouchang  | 292113.8    | 1190934.2   | Ignimbrite     | 20 | 18 | 130.5 | 1.1 | 0.84   | 0.46 | 0.97 |
| HJ01                                                                                                                  | Jiande    | Lower Huangjian  | 291813.4    | 1191009.0   | Tuff           | 22 | 19 | 129.1 | 1.4 | 1.08   | 0.26 | 1.00 |
| HJ02                                                                                                                  | Jiande    | Upper Huangjian  | 291625.2    | 1190928.1   | Tuff           | 16 | 16 | 127.3 | 1.1 | 0.86   | 0.13 | 1.00 |
| HJ05                                                                                                                  | Jiande    | Basal Huangjian  | 291605.2    | 1190828.5   | Rhyolite       | 15 | 12 | 130.2 | 1.2 | 0.92   | 0.25 | 0.99 |
| LC01                                                                                                                  | Jiande    | Upper Laocun     | 291624.5    | 1190519.8   | Ignimbrite     | 20 | 20 | 131.7 | 1.1 | 0.84   | 0.30 | 1.00 |
| LC02                                                                                                                  | Jiande    | Middle Laocun    | 291652.0    | 1190432.2   | Ignimbrite     | 25 | 25 | 135.5 | 1.0 | 0.74   | 0.21 | 1.00 |
| T0003                                                                                                                 | Laocun    | Lower Laocun     | 291820.0    | 1190359.0   | Tuff           | 17 | 10 | 135.3 | 1.6 | 1.18   | 0.65 | 0.75 |
| T0004                                                                                                                 | Laocun    | Lower Laocun     | 291813.0    | 1190413.0   | Crystal tuff   | 14 | 12 | 135.5 | 2.6 | 1.92   | 1.50 | 0.11 |
| T0007                                                                                                                 | Laocun    | Upper Laocun     | 291705.0    | 1190353.0   | Crystal tuff   | 16 | 12 | 130.7 | 1.6 | 1.22   | 0.69 | 0.75 |
| T0011                                                                                                                 | Laocun    | Upper Laocun     | 291709.0    | 1190701.0   | Rhyoporphyry   | 10 | 5  | 128.7 | 2.1 | 1.63   | 0.46 | 0.77 |
| M10, Jinhua (Li CL et al., 2014)                                                                                      |           |                  |             |             |                |    |    |       |     |        |      |      |
| DY11-155-1                                                                                                            | SW Jinhua | Lower Xishantou  | 285625.0    | 1192404.0   | Rhyolite       | 20 | 18 | 140.2 | 1.0 | 0.71   | 1.16 |      |
| M11, Yongkang (10ZJ109 from Zhang et al., 2018; another from Li JH et al., 2014)                                      |           |                  |             |             |                |    |    |       |     |        |      |      |
| DY11-120-1                                                                                                            | Yongkang  | Top Xishantou    | 284701.0    | 1200633.0   | Rhyolite       | 18 | 12 | 136.4 | 1.2 | 0.88   | 2.20 |      |
| zj47-1                                                                                                                | Yongkang  | Top Guantou      | 284717.6    | 1200550.9   | Tuff           | 11 | 11 | 119.0 | 2.0 | 1.68   | 1.80 |      |
| zj47-2                                                                                                                | Yongkang  | Top Guantou      | 284717.6    | 1200550.9   | Tuff           | 12 | 10 | 104.0 |     | 2 1.92 | 0.6  |      |
| zj49                                                                                                                  | Yongkang  | Moshishan Gr     | 294821.0    | 1195930.0   | Rhyolite       | 14 | 13 | 129.0 | 1.0 | 0.78   | 0.17 |      |
| 10ZJ109                                                                                                               | Yongkang  | Guantou          | 284730.0    | 1200532.0   | Rhyolite       | 6  | 6  | 133.0 | 3.0 | 2.26   | 0.40 |      |
| 10ZJ109                                                                                                               | Yongkang  | Guantou          | 284730.0    | 1200532.0   | Rhyolite       | 14 | 11 | 106.0 | 3.0 | 2.83   | 0.80 |      |
| M12, Yanzhai (Ma et al., 2016)                                                                                        |           |                  |             |             |                |    |    |       |     |        |      |      |
| ZJ90                                                                                                                  | Yanzhai   | Guantou          | Unavaiaible | Unavaiaible | Tuff           | 30 | 30 | 122.0 | 1.0 | 0.82   | 3.30 |      |
| ZJ93                                                                                                                  | Yanzhai   | Chaochuan        | Unavaiaible | Unavaiaible | Tuff           | 17 | 17 | 112.0 | 1.0 | 0.89   | 1.90 |      |
| WYS08                                                                                                                 | Yanzhai   | Chaochuan        | Unavaiaible | Unavaiaible | Tuff           | 18 | 18 | 114.0 | 1.0 | 0.88   | 2.70 |      |
| WYS09                                                                                                                 | Yanzhai   | Chaochuan        | Unavaiaible | Unavaiaible | Tuff           | 12 | 12 | 114.0 | 2.0 | 1.75   | 2.40 |      |
| M13, Laozhu, Lishui (ZJ66 from Ma et al., 2016; 10ZJ064 from Zhang et al., 2018; and others from Wang et al., 2015)   |           |                  |             |             |                |    |    |       |     |        |      |      |
| ZJ66                                                                                                                  | Laozhu    | Lower Chaochuan  | Unavaiaible | Unavaiaible | Tuff           | 22 | 22 | 118.0 | 1.0 | 0.85   | 1.80 |      |
| 10ZJ064                                                                                                               | Liucheng  | Chaochuan        | 284143.0    | 1193823.0   | Rhyolite       | 9  | 9  | 130.0 | 2.0 | 1.54   | 1.20 |      |
| 10ZJ064                                                                                                               | Liucheng  | Chaochuan        | 284143.0    | 1193823.0   | Rhyolite       | 12 | 8  | 107.5 | 2.0 | 1.86   | 2.00 | 0.05 |
| T1                                                                                                                    | Zhucun    | Middle Moshishan | Unavaiaible | Unavaiaible | Rhyoporphyry   | 15 | 9  | 124.9 | 2.0 | 1.60   | 0.53 | 0.83 |
| T2                                                                                                                    | Zhucun    | Middle Xishantou | Unavaiaible | Unavaiaible | Tuff           | 14 | 8  | 128.8 | 1.8 | 1.40   | 0.37 | 0.94 |
| T3                                                                                                                    | Zhucun    | Lower Jiuliping  | Unavaiaible | Unavaiaible | Rhyolite       | 13 | 10 | 128.7 | 3.3 | 2.56   | 1.30 | 0.26 |
| M14, Maonong, Songyang (Liu et al., 2012)                                                                             |           |                  |             |             |                |    |    |       |     |        |      |      |
| MN01                                                                                                                  | Maonong   | Lower Maonong    | 282155.0    | 1193752.0   | Dacitic tuff   | 21 | 21 | 177.4 | 1.0 | 0.56   | 0.59 | 0.92 |
| M15, Xujiadun, Jiangshan (Zhang et al., 2009)                                                                         |           |                  |             |             |                |    |    |       |     |        |      |      |
| B1                                                                                                                    | Jiangshan | Upper Ehuling    | 282001.0    | 1183236.3   | Rhyolite       | 17 | 15 | 138.4 | 1.7 | 1.23   | 1.15 | 0.30 |
| N1, Xiaoxiong, Sanmen (Liu et al., 2012)                                                                              |           |                  |             |             |                |    |    |       |     |        |      |      |
| XX06                                                                                                                  | Xiaoxiong | Upper Xiaoxiong  | 290205.0    | 1213730.0   | Rhyolitic tuff | 19 | 15 | 93.8  | 0.6 | 0.59   | 0.96 | 0.49 |
| N2, Taozu (Chen et al., 2008)                                                                                         |           |                  |             |             |                |    |    |       |     |        |      |      |
| ZJ-23                                                                                                                 | Taozu     | ?                | Unavaiaible | Unavaiaible | Rhyolite       | 8  | 7  | 76.3  | 0.8 | 1.05   | 1.40 | 0.22 |
| ZJ-24                                                                                                                 | Taozu     | ?                | Unavaiaible | Unavaiaible | Rhyolite       | 17 | 8  | 87.8  | 1.1 | 1.25   | 2.60 | 0.01 |
| N3, Tangshang, Tiantai (TS01 from Liu et al., 2012; another from Zhang et al., 2018)                                  |           |                  |             |             |                |    |    |       |     |        |      |      |
| TS01                                                                                                                  | Tangshang | Lower Tangshang  | 290818.0    | 1205612.0   | Lithic tuff    | 18 | 18 | 111.3 | 1.0 | 0.85   | 0.67 | 0.84 |
| 10ZJ1025                                                                                                              | Tiantai   | Louwe Thangshang | 290813.0    | 1205630.0   | Ignimbrite     | 10 | 10 | 133.0 | 1.0 | 0.75   | 0.60 |      |
| 10ZJ1025                                                                                                              | Tiantai   | Louwe Thangshang | 290813.0    | 1205630.0   | Ignimbrite     | 6  | 6  | 111.0 | 1.0 | 0.90   | 0.90 |      |
| N4, Jiuliping, Tiantai (JL-02 from Chen et al., 2008; the left from Liu et al., 2012)                                 |           |                  |             |             |                |    |    |       |     |        |      |      |
| JL-02                                                                                                                 | Jiuliping | ?                | Unavaiaible | Unavaiaible | Rhyolite       | 30 | 9  | 101.1 | 1.6 | 1.58   | 1.30 | 0.21 |
| GW01                                                                                                                  | Jiuliping | Mid Gaowu        | 290404.0    | 1205403.0   | Rhyolitic tuff | 18 | 18 | 132.9 | 1.2 | 0.90   | 0.27 | 1.00 |
| GW02                                                                                                                  | Jiuliping | Upper Gaowu      | 290355.0    | 1205420.0   | Rhyolitic tuff | 20 | 20 | 131.7 | 1.5 | 1.14   | 0.15 | 1.00 |
| XST03                                                                                                                 | Jiuliping | Lower Xishantou  | 290356.0    | 1205257.0   | Ignimbrite     | 20 | 20 | 130.5 | 1.0 | 0.77   | 0.47 | 0.98 |
| XST02                                                                                                                 | Jiuliping | Middle Xishantou | 290357.0    | 1205254.0   | Ignimbrite     | 20 | 20 | 128.7 | 1.2 | 0.93   | 0.16 | 1.00 |
| XST01                                                                                                                 | Jiuliping | Upper Xishantou  | 290359.0    | 120554.0    | Ignimbrite     | 20 | 20 | 127.6 | 1.1 | 0.86   | 0.52 | 0.95 |
| CW01                                                                                                                  | Jiuliping | Upper Chawan     | 290350.0    | 1205150.0   | Tuff           | 18 | 18 | 122.0 | 1.8 | 1.48   | 1.40 | 0.12 |
| JLP01                                                                                                                 | Jiuliping | Upper Jiuliping  | 290400.0    | 1205144.0   | Rhyolite       | 21 | 21 | 120.7 | 0.9 | 0.76   | 0.94 | 0.54 |
| N5, Xianju (Li CL et al., 2014)                                                                                       |           |                  |             |             |                |    |    |       |     |        |      |      |
| DY11-13-3                                                                                                             | Xianju    | Lower Gaowu      | N285047     | E1203934    | Rhyolite       | 20 | 9  | 142.7 | 2.6 | 1.82   | 0.17 |      |
| DY11-63-3                                                                                                             | Xianju    | Lower Gaowu      | N285307     | E1203814    | Rhyolite       | 20 | 14 | 141.3 | 1.4 | 0.99   | 1.40 |      |
| N6, Qingyuan (Duan et al., 2013)                                                                                      |           |                  |             |             |                |    |    |       |     |        |      |      |
| 117QY-1-1                                                                                                             | Wudabao   | Lower Gaowu      | Unavaiaible | Unavaiaible | Ignimbrite     | 25 | 25 | 136.0 | 1.6 | 1.18   | 0.11 | 1.00 |
| 117QY-3-1                                                                                                             | Wudabao   | Upper Gaowu      | Unavaiaible | Unavaiaible | Ignimbrite     | 25 | 25 | 133.3 | 0.7 | 0.50   | 0.82 | 0.72 |
| 117QY-4-2                                                                                                             | Zuoxi     | Lower Xishantou  | Unavaiaible | Unavaiaible | Ignimbrite     | 29 | 29 | 132.1 | 1.5 | 1.14   | 0.64 | 0.93 |

|                                                                                                                                                              |           |                |                    |             |             |                 |    |    |       |     |      |      |      |
|--------------------------------------------------------------------------------------------------------------------------------------------------------------|-----------|----------------|--------------------|-------------|-------------|-----------------|----|----|-------|-----|------|------|------|
| 117QY-10-1                                                                                                                                                   |           | Zuoxi          | Upper Xishantou    | Unavaiaable | Unavaiaable | Rhyolite        | 25 | 21 | 127.9 | 1.7 | 1.33 | 0.15 | 1.00 |
| N7, Taishun (Duan et al., 2013)                                                                                                                              |           |                |                    |             |             |                 |    |    |       |     |      |      |      |
| 117TS-12-1                                                                                                                                                   |           | Xiahong        | Upper Xiaopingtian | Unavaiaable | Unavaiaable | Rhyolitic tuff  | 25 | 17 | 114.5 | 1.4 | 1.22 | 0.21 | 1.00 |
| 117TS-3-1                                                                                                                                                    |           | Xianghuojian   | Middle Taishun     | Unavaiaable | Unavaiaable | Rhyolitic tuff  | 25 | 20 | 112.7 | 1.3 | 1.15 | 0.47 | 0.97 |
| 117TS-2-1                                                                                                                                                    |           | Xianghuojian   | Upper Taishun      | Unavaiaable | Unavaiaable | Rhyolitic tuff  | 23 | 13 | 111.7 | 1.6 | 1.43 | 0.41 | 0.96 |
| Jiangxi province                                                                                                                                             |           |                |                    |             |             |                 |    |    |       |     |      |      |      |
| L5, Shixi, Yanshan                                                                                                                                           |           |                |                    |             |             |                 |    |    |       |     |      |      |      |
| E1                                                                                                                                                           | 1107-01   | Baojiachang    | Lower Shixi        | 281558.8    | 1175200.4   | Trachyte        | 15 | 14 | 138.5 | 1.5 | 1.08 | 1.07 | 0.38 |
| E2                                                                                                                                                           | 1107-02   | Baojiachang    | Lower Shixi        | 281645.7    | 1175152.5   | Trachyte        | 15 | 12 | 136.1 | 1.3 | 0.96 | 1.08 | 0.37 |
| E3                                                                                                                                                           | 1107-03   | Chating        | Middle Shixi       | 281754.0    | 1175240.2   | Rhyodacite      | 15 | 15 | 136.2 | 1.3 | 0.95 | 1.17 | 0.31 |
| E4                                                                                                                                                           | 1107-04   | Chating        | Middle Shixi       | 281754.1    | 1175240.3   | Trachyte        | 15 | 14 | 130.8 | 1.4 | 1.07 | 0.85 | 0.57 |
| E5                                                                                                                                                           | 13103-03  | Zhongzhou      | Lower Ehuling      | 281547.4    | 1175456.3   | Tuff            | 15 | 11 | 140.0 | 1.2 | 0.86 | 0.37 | 0.96 |
| L6, Datianchenjia, Guixi                                                                                                                                     |           |                |                    |             |             |                 |    |    |       |     |      |      |      |
| F1                                                                                                                                                           | 1108-04   | Shangzengjia   | Lower Ehuling      | 280804.3    | 1170834.1   | Rhyolitic tuff  | 15 | 15 | 136.9 | 1.1 | 0.80 | 0.70 | 0.78 |
| F2                                                                                                                                                           | 1109-05   | Shangzengjia   | Middle Ehuling     | 280810.7    | 1170844.4   | Rhyolitic tuff  | 15 | 11 | 131.9 | 1.5 | 1.14 | 0.80 | 0.61 |
| F3                                                                                                                                                           | 13104-01  | Shangzengjia   | ?Luotang Lower     | 280814.6    | 1170814.4   | Rhyodacite      | 15 | 14 | 139.8 | 1.2 | 0.86 | 0.73 | 0.70 |
| L60, Aoxi town, Le'an (Li et al., 2019)                                                                                                                      |           |                |                    |             |             |                 |    |    |       |     |      |      |      |
| 150127-01zk                                                                                                                                                  |           | Tangang        | Lower Daguding     | 272441.9    | 1154527.4   | Porphyrite      | 20 | 13 | 136.6 | 1.1 | 0.8  | 0.9  | 0.60 |
| 150127-02zk                                                                                                                                                  |           | Shitang        | Upper Dashuang     | 272504.5    | 1154427.6   | Tuff            | 20 | 7  | 128.5 | 1.5 | 1.2  | 0.7  | 0.69 |
| L7, Tiantou, Ningdu (G2 from Li et al., 2019; G1 from this work)                                                                                             |           |                |                    |             |             |                 |    |    |       |     |      |      |      |
| G1                                                                                                                                                           | 150124-01 | Baisha         | Lower Ganzhou Gr   | 261715.6    | 1155657.0   | Andesite matrix | 20 | 12 | 135.0 | 3.0 | 2.22 | 2.20 | 0.03 |
| G2                                                                                                                                                           | 13109-01  | Baisha, Ningdu | Shixi ?            | 261720.7    | 1155659.4   | Andesite        | 20 | 3  | 138.3 | 5.1 | 3.69 | 0.42 | 0.66 |
| M16, Wushanqiu, Yanshan (Liu et al., 2009)                                                                                                                   |           |                |                    |             |             |                 |    |    |       |     |      |      |      |
| SH003                                                                                                                                                        |           | Wushanqiu      | Shixi              | Unavailable | Unavailable | Trachyte        | 14 | 13 | 136.4 | 1.5 | 1.10 | 2.70 | 0.00 |
| M16b, Shuangling, Guxi (GX103 from Wu and Wu, 2013; others from Shu et al., 2017)                                                                            |           |                |                    |             |             |                 |    |    |       |     |      |      |      |
| GX103                                                                                                                                                        |           | Shenyuan       | Ehuling            | 280924.0    | 1170624.0   | Rhyolite        | 15 | 11 | 134.3 | 1.6 | 1.19 | 1.01 |      |
| 14SY-42                                                                                                                                                      |           | Shenyuan       | Ehuling            | Unavailable | Unavailable | Tuff            | 22 | 21 | 137.5 | 1.2 | 0.87 | 0.40 |      |
| 14SY-1                                                                                                                                                       |           | Shenyuan       | Ehuling            | Unavailable | Unavailable | Trachyandesite  | 16 | 14 | 135.8 | 2.0 | 1.47 | 0.50 |      |
| 14SY-36                                                                                                                                                      |           | Shenyuan       | Shixi              | Unavailable | Unavailable | Tuff            | 17 | 17 | 136.5 | 1.6 | 1.17 | 1.50 |      |
| 14SY-17                                                                                                                                                      |           | Shenyuan       | Shixi              | Unavailable | Unavailable | Tuff            | 20 | 20 | 135.6 | 1.0 | 0.74 | 1.50 |      |
| M17, Tianhuashan, Jiangxi (LSK-30 from Su et al., 2014; the left from Su et al., 2013)                                                                       |           |                |                    |             |             |                 |    |    |       |     |      |      |      |
| LSK-30                                                                                                                                                       |           | Lengshuikeng   | Ehuling            | 280146.0    | 1170547.0   | Rhyolite        | 16 | 16 | 139.9 | 0.9 | 0.64 | 1.80 | 0.02 |
| LSK-107                                                                                                                                                      |           | Lengshuikeng   | Ehuling            | 280146.0    | 1170547.0   | Andesite        | 21 | 12 | 142.2 | 0.8 | 0.54 | 1.20 | 0.29 |
| MD06                                                                                                                                                         |           | Tianhuashan    | Ehuling            | 271615.0    | 1171144.0   | Ignimbrite      | 39 | 39 | 136.6 | 0.5 | 0.36 | 0.20 | 1.00 |
| SH10-15                                                                                                                                                      |           | Tianhuashan    | Ehuling            | 280141.0    | 1170532.0   | Tuffite         | 42 | 23 | 129.0 | 0.4 | 0.33 | 1.04 | 0.40 |
| SH10-27                                                                                                                                                      |           | Tianhuashan    | Daguding           | 280208.0    | 1170547.0   | Crystal tuff    | 28 | 27 | 143.7 | 0.6 | 0.44 | 2.50 | 0.00 |
| M18, Xiangshan, Le'an (Upper seven samples from Yang et al., 2010, 2013; Samples with letters D and ZK from Guo et al., 2015; the left from Wu et al., 2017) |           |                |                    |             |             |                 |    |    |       |     |      |      |      |
| XS-30-1                                                                                                                                                      |           | Xiangshan      | Daguding           | Unavailable | Unavailable | Rhyodacite      | 23 | 21 | 134.9 | 1.7 | 1.26 | 3.10 |      |
| XS-30-3                                                                                                                                                      |           | Xiangshan      | Ehuling            | Unavailable | Unavailable | Rhyodacite      | 8  | 7  | 134.8 | 1.7 | 1.26 | 1.70 |      |
| RYT03                                                                                                                                                        |           | Ruyiting       | Daguding           | Unavailable | Unavailable | Ignimbrite      | 15 | 15 | 137.3 | 0.9 | 0.66 | 1.70 |      |
| RYT04                                                                                                                                                        |           | Ruyiting       | Daguding           | Unavailable | Unavailable | Rhyolitic tuff  | 14 | 14 | 136.8 | 2.5 | 1.83 | 9.40 |      |
| RYT05                                                                                                                                                        |           | Ruyiting       | Daguding           | Unavailable | Unavailable | Rhyolitic tuff  | 20 | 20 | 136.4 | 1.5 | 1.10 | 4.60 |      |
| RYT06                                                                                                                                                        |           | Ruyiting       | Ehuling            | Unavailable | Unavailable | Dacite          | 15 | 15 | 135.0 | 2.0 | 1.48 | 5.90 |      |
| RYT07                                                                                                                                                        |           | Ruyiting       | Ehuling            | Unavailable | Unavailable | Mortary lava    | 23 | 23 | 134.1 | 1.6 | 1.19 | 7.60 |      |
| RYT501                                                                                                                                                       |           | Ruyiting       | Shuangfengling     | Unavailable | Unavailable | Ignimbrite      | 23 | 13 | 137.5 | 1.4 | 1.02 | 0.73 |      |
| RYT503                                                                                                                                                       |           | Ruyiting       | Shuangfengling     | Unavailable | Unavailable | Ignimbrite      | 13 | 13 | 136.4 | 1.1 | 0.81 | 0.49 |      |
| RYT504                                                                                                                                                       |           | Ruyiting       | Ehuling            | Unavailable | Unavailable | Mortary lava    | 13 | 13 | 135.4 | 1.5 | 1.11 | 1.30 |      |
| RYT582                                                                                                                                                       |           | Ruyiting       | Shuangfengling     | Unavailable | Unavailable | Dacite          | 14 | 14 | 137.4 | 1.1 | 0.80 | 1.30 |      |
| LJL112                                                                                                                                                       |           | Lijialing      | Shuangfengling     | Unavailable | Unavailable | Dacite          | 13 | 12 | 137.4 | 1.4 | 1.02 | 2.50 |      |
| YJ201                                                                                                                                                        |           | Yunji          | Ehuling            | Unavailable | Unavailable | Mortary lava    | 14 | 12 | 135.2 | 1.2 | 0.89 | 0.25 |      |
| D0026                                                                                                                                                        |           | Youfang        | Daguding           | Unavailable | Unavailable | Ignimbrite      | 30 | 24 | 138.2 | 1.6 | 1.16 | 1.80 |      |
| D0839                                                                                                                                                        |           | Xiangshan      | Daguding           | Unavailable | Unavailable | Ignimbrite      | 20 | 17 | 140.1 | 1.8 | 1.28 | 3.10 |      |
| D0001-1                                                                                                                                                      |           | Ruyiting       | Daguding           | Unavailable | Unavailable | Ignimbrite      | 41 | 14 | 140.7 | 2.7 | 1.92 | 3.30 |      |
| D0004-1                                                                                                                                                      |           | Ruyiting       | Ehuling            | Unavailable | Unavailable | Ignimbrite      | 25 | 22 | 135.6 | 1.2 | 0.88 | 1.60 |      |
| ZK26-101-2                                                                                                                                                   |           | Niutoushan     | Daguding           | Unavailable | Unavailable | Dacite          | 14 | 14 | 135.0 | 1.8 | 1.33 | 1.16 |      |
| ZK26-101-70                                                                                                                                                  |           | Niutoushan     | Ehuling            | Unavailable | Unavailable | Mortary lava    | 27 | 25 | 133.6 | 1.3 | 0.97 | 1.30 |      |
| M18b, southmost Jiangxi and northmost Guangdong (Wu et al., 2011a, b)                                                                                        |           |                |                    |             |             |                 |    |    |       |     |      |      |      |
| AY015                                                                                                                                                        |           | Sanbaishan     | Ehuling            | 250610.0    | 1152607.0   | Trachyte        | 14 | 13 | 141.6 | 1.0 | 0.68 | 1.20 |      |
| DCS-110                                                                                                                                                      |           | Dachangshan    | Unavailable        | 2439*10.0   | 11522*28.1  | Trachyte        | 13 | 13 | 135.4 | 1.5 | 1.11 | 0.84 |      |
| BS003                                                                                                                                                        |           | Sanmenzhai     | Unavailable        | Unavailable | Unavailable | Rhyolite        | 14 | 14 | 131.4 | 1.3 | 0.99 | 0.97 |      |
| BS201                                                                                                                                                        |           | Banshi         | Ehuling            | Unavailable | Unavailable | Rhyolitic tuff  | 14 | 12 | 142.5 | 1.3 | 0.91 | 1.70 |      |
| CF102                                                                                                                                                        |           | Caifang        | Upper Ehuling      | Unavailable | Unavailable | Rhyolite        | 14 | 14 | 130.8 | 0.7 | 0.56 | 1.30 |      |
| M18c, southmost Jiangxi and northmost Guangdong (Wu et al., 2012)                                                                                            |           |                |                    |             |             |                 |    |    |       |     |      |      |      |
| CT015                                                                                                                                                        |           | Yousheng       | Yousheng           | 243008.3    | 1150512.0   | Rhyolite        | 14 | 12 | 96.8  | 1.4 | 1.45 | 1.30 |      |
| RJ203                                                                                                                                                        |           | Wutuoxi        | Yousheng           | 244837.6    | 1155640.6   | Rhyolite        | 14 | 14 | 95.5  | 1.3 | 1.36 | 1.30 |      |
| XW003                                                                                                                                                        |           | Zhuxia'ao      | Yousheng           | 245417.4    | 1154122.2   | Mortar lava     | 14 | 13 | 96.7  | 1.1 | 1.14 | 0.61 |      |

L8, Golden Lake, Taining (H6 from Li et al., 2019; and the left from this work)

|    |            |           |                |          |           |              |    |    |       |     |      |      |      |
|----|------------|-----------|----------------|----------|-----------|--------------|----|----|-------|-----|------|------|------|
| H1 | 1110-01    | Dabu      | Lower Zhaixia  | 264326.8 | 1170231.7 | Trachyte     | 15 | 15 | 96.9  | 1.0 | 1.03 | 0.71 | 0.77 |
| H2 | 1110-02    | Dabu      | Middle Zhaixia | 264307.9 | 1170211.3 | Trachyte     | 15 | 15 | 97.5  | 1.0 | 1.03 | 0.64 | 0.84 |
| H3 | 1110-03    | Dabu      | Top Shaxian    | 264239.0 | 1170137.5 | Trachyte     | 15 | 15 | 97.3  | 1.0 | 0.98 | 0.59 | 0.87 |
| H4 | 1110-04    | Meikou    | Lower Zhaixia  | 264506.3 | 1170059.2 | Tuff?        | 20 | 5  | 113.7 | 3.6 | 3.17 | 2.10 | 0.06 |
| H5 | 0125-01    | Meikou    | Top Zhaixia    | 265117.1 | 1170336.4 | Dacitic tuff | 20 | 17 | 101.2 | 1.2 | 1.19 | 1.30 | 0.26 |
| H6 | 13105-03zk | Maoershan | Lower Zhaixia  | 264719.1 | 1170129.7 | Andsite      | 15 | 12 | 130.7 | 1.4 | 1.1  | 0.9  | 0.60 |

L9, Jikou-Longdong, Shaxian (I5 from Li et al., 2019; others from this work)

|    |           |              |                  |          |           |          |    |    |       |     |      |      |      |
|----|-----------|--------------|------------------|----------|-----------|----------|----|----|-------|-----|------|------|------|
| I1 | SX-04     | Longdong     | Shaxian          | 262150.4 | 1174332.5 | Tuff     | 15 | 14 | 93.3  | 1.6 | 1.71 | 0.09 | 1.00 |
| I2 | 150122-01 | Shaxian town | Shaxian          | 262440.2 | 1174621.2 | Tuff     | 19 | 13 | 94.2  | 1.1 | 1.17 | 1.02 | 0.43 |
| I3 | 13106-02  | Shxian town  | Shaxian/Zhaixia? | 262444.1 | 1174622.5 | Tuff     | 15 | 14 | 133.9 | 2.1 | 1.57 | 1.50 | 0.10 |
| I4 | 1111-01   | South Jikou  | Middle Shaxian   | 262501.0 | 1174831.3 | Tuff?    | 15 | 2  | 114.0 | 2.8 | 2.46 | 0.00 | 1.00 |
| I5 | 1110-06   | North Jikou  | Top Zhaixia      | 262616.2 | 1174833.0 | Trachyte | 15 | 12 | 99.1  | 1.5 | 1.51 | 3.50 | 0.10 |

L10, Xiadu-Jishan, Yongan

|    |         |        |              |          |           |              |    |    |       |     |      |      |      |
|----|---------|--------|--------------|----------|-----------|--------------|----|----|-------|-----|------|------|------|
| J1 | 0125-05 | Xiadu  | Bantou       | 255938.1 | 1172129.8 | Dacitic tuff | 6  | 5  | 134.4 | 2.9 | 2.16 | 1.19 | 0.26 |
|    | 0125-05 | Xiadu  | Bantou       | 255938.1 | 1172129.8 | Dacitic tuff | 13 | 11 | 155.0 | 2.4 | 1.55 | 3.90 | 0.10 |
| J2 | YA-01   | Xiadu  | Lower Xiadu  | 255914.7 | 1172126.8 | Ignimbrite   | 15 | 15 | 160.0 | 1.2 | 0.75 | 2.30 | 0.69 |
| J3 | YA-02   | Yongan | Xiadu        | 255852.3 | 1172115.8 | Trachyte     | 15 | 13 | 150.5 | 1.1 | 0.73 | 0.78 | 0.51 |
| J4 | 0125-04 | Yongan | Xiadu        | 255828.2 | 1172048.0 | Ignimbrite   | 7  | 6  | 151.2 | 1.4 | 0.93 | 0.32 | 0.90 |
|    | 0125-04 | Yongan | Xiadu        | 255828.2 | 1172048.0 | Ignimbrite   | 13 | 8  | 158.0 | 1.5 | 0.95 | 0.71 | 0.66 |
| J5 | 1112-02 | Jishan | Bantou       | 255631.3 | 1171958.8 | Trachyte     | 15 | 1  | 132.4 | 1.2 | 0.91 | 1.50 | 0.15 |
| J6 | YA-13   | Jishan | Bantou       | 255735.3 | 1172017.0 | Ignimbrite   | 20 | 20 | 127.3 | 0.6 | 0.46 | 0.62 | 0.89 |
| J7 | YA-04A  | Jishan | Lower Bantou | 255722.3 | 1171956.6 | Dacitic tuff | 15 | 12 | 132.1 | 3.1 | 2.35 | 5.3  | 0.01 |
| J8 | YA-04B  | Jishan | Bantou       | 255722.5 | 1171956.6 | Dacitic tuff | 15 | 12 | 143.2 | 1.4 | 0.98 | 0.48 | 0.91 |
| J9 | 1112-01 | Jishan | Bantou       | 255752.9 | 1172016.8 | Trachyte     | 6  | 5  | 125.4 | 2.8 | 2.23 | 2.10 | 0.10 |
|    | 1112-01 | Jishan | Bantou       | 255752.9 | 1172016.8 | Trachyte     | 9  | 7  | 134.5 | 2.8 | 2.08 | 4.70 | 0.01 |

M19, Xiamei, Wuyishan (Hu et al., 2011)

|        |        |              |          |           |      |    |    |       |     |      |      |      |
|--------|--------|--------------|----------|-----------|------|----|----|-------|-----|------|------|------|
| wys-01 | Xiamei | Top Xiadu    | 273955.5 | 1180034.9 | Tuff | 17 | 17 | 132.0 | 2.2 | 1.67 | 3.20 | 0.00 |
| wys-02 | Xiamei | Basal Bantou | 273955.5 | 1180034.9 | Tuff | 11 | 10 | 125.3 | 5.3 | 4.23 | 9.40 | 0.00 |

M20, Baiyashan, Taining (Liu et al., 2016)

|       |           |           |          |           |  |    |    |      |     |      |      |      |
|-------|-----------|-----------|----------|-----------|--|----|----|------|-----|------|------|------|
| SMS20 | Baiyashan | Baiyashan | 264209.7 | 1165716.9 |  | 11 | 10 | 99.7 | 1.3 | 1.30 | 0.51 | 0.87 |
|-------|-----------|-----------|----------|-----------|--|----|----|------|-----|------|------|------|

M21, Jishan and Xiadu, Yongan (js-jch and js-09 from Hu et al., 2011; others from Liu et al., 2016)

|          |        |              |             |             |                |    |    |       |     |      |       |      |
|----------|--------|--------------|-------------|-------------|----------------|----|----|-------|-----|------|-------|------|
| js-09-a  | Jishan | Lower Bantou | Unavailable | Unavailable | Tuff           | 29 | 27 | 148.3 | 2.9 | 1.96 | 10.40 | 0.00 |
| js-jch-a | Jishan | Lower Bantou | Unavailable | Unavailable | Tuff           | 21 | 21 | 147.7 | 4.4 | 2.98 | 17.00 | 0.00 |
| NY36     | Xiadu  | Xiadu        | 255939.2    | 1172129.7   | Crystal tuff   | 21 | 13 | 135.2 | 2.1 | 1.55 | 0.10  | 1.00 |
| NY37     | Xiadu  | Xiadu        | 255942.2    | 1172130.3   | Tuff           | 22 | 16 | 132.5 | 2.1 | 1.58 | 0.12  | 1.00 |
| NY38     | Xiadu  | Baiyashan    | 255953.9    | 1172134.0   | Lithic tuff    | 19 | 8  | 99.5  | 2.0 | 2.01 | 0.23  | 0.99 |
| NY39     | Xiadu  | Baiyashan    | 260000.5    | 1172135.5   | Rhyolitic tuff | 20 | 12 | 97.5  | 1.3 | 1.33 | 0.55  | 0.87 |

M22, Zijinshan and Shanghang, SW Fujian (Jiang et al., 2013, 2015)

|         |            |                  |                  |           |                |    |    |       |     |      |      |  |
|---------|------------|------------------|------------------|-----------|----------------|----|----|-------|-----|------|------|--|
| ZJ10-7  | Zijinshan  | Lower Zhaixia?   | 251107.9         | 1162454.8 | Dacite         | 14 | 6  | 110.0 | 1.0 | 0.91 | 0.73 |  |
| ZJ10-12 | Zijinshan  | Lower Zhaixia?   | Close to ZJ10-7  |           | Tuff           | 19 | 13 | 110.0 | 1.0 | 0.91 | 1.40 |  |
| ZJ10-16 | Jinshizhai | Upper Huangkeng  | Close to Yueyang |           | Rhyolitic tuff | 18 | 17 | 105.0 | 1.0 | 0.95 | 2.60 |  |
| ZJ10-21 | Jinshizhai | Upper Huangkeng  | Close to Yueyang |           | Ignimbrite     | 20 | 20 | 108.0 | 1.0 | 0.93 | 0.37 |  |
| ZJ10-22 | Jinshizhai | Upper Huangkeng  | Close to Yueyang |           | Rhyolite       | 20 | 18 | 102.0 | 1.0 | 0.98 | 0.93 |  |
| ZJ10-23 | Zijinshan  | Upper Huangkeng? | Close to ZJ10-7  |           | Ignimbrite     | 20 | 18 | 102.0 | 1.0 | 0.98 | 0.93 |  |
| SH12-1  | Yueyang    | Upper Zhaixia    | 251001.7         | 1162054.7 | Rhyolite       | 19 | 10 | 99.0  | 1.0 | 1.01 | 0.41 |  |
| SH12-2  | Yueyang    | Lower Zhaixia    | 251004.3         | 1162135.6 | Rhyolite       | 20 | 7  | 101.0 | 1.0 | 0.99 | 1.19 |  |
| SH12-3  | Yueyang    | Lower Zhaixia    | 251028.6         | 1162129.4 | Tuff           | 20 | 7  | 103.0 | 1.0 | 0.97 | 1.00 |  |
| SH12-4  | Yueyang    | Lower Zhaixia    | 251027.1         | 1162130.5 | Tuff           | 20 | 11 | 103.0 | 1.0 | 0.97 | 1.70 |  |
| SH12-6  | Yueyang    | Lower Zhaixia    | 251114.7         | 1162041.1 | Tuff           | 20 | 14 | 102.0 | 1.0 | 0.98 | 1.12 |  |
| SH12-7  | Yueyang    | Upper Huangkeng  | 251033.9         | 1162149.4 | Tuff           | 16 | 16 | 105.0 | 1.0 | 0.95 | 0.73 |  |
| SH12-8  | Yueyang    | Upper Huangkeng  | 251031.1         | 1162149.6 | Dacite         | 18 | 18 | 102.0 | 1.0 | 0.98 | 1.14 |  |
| SH12-9  | Yueyang    | Upper Huangkeng  | 25109.0          | 1162156.6 | Dacite         | 20 | 19 | 105.0 | 1.0 | 0.95 | 4.80 |  |
| SH12-13 | Yueyang    | Upper Zhaixia    | 250642.1         | 1162528.2 | Dacite         | 16 | 13 | 100.0 | 1.0 | 1.00 | 0.30 |  |
| SH12-14 | Yueyang    | Upper Zhaixia    | 250644.0         | 1162529.2 | Dacite         | 19 | 15 | 100.0 | 1.0 | 1.00 | 0.44 |  |

N8, Shouning (Duan et al., 2013)

|           |      |               |             |             |                |    |    |       |     |      |      |      |
|-----------|------|---------------|-------------|-------------|----------------|----|----|-------|-----|------|------|------|
| 117SN-3-1 | Xixi | Lower Nanyuan | Unavaiaible | Unavaiaible | Rhyolitic tuff | 27 | 24 | 143.3 | 1.6 | 1.12 | 0.24 | 1.00 |
| 117SN-1-1 | Xixi | Upper Xiaoxi  | Unavaiaible | Unavaiaible | Rhyolitic tuff | 25 | 20 | 126.2 | 1.4 | 1.11 | 0.54 | 0.94 |

N9, Zhenghe (117ZH-2-1 from Duan et al., 2013; anthor one from Li et al., 2015)

|           |          |               |             |             |                |    |    |       |     |      |      |      |
|-----------|----------|---------------|-------------|-------------|----------------|----|----|-------|-----|------|------|------|
| 117ZH-2-1 | Zhenqian | Upper Nanyuan | Unavaiaible | Unavaiaible | Mortary lava   | 25 | 25 | 140.1 | 1.6 | 1.14 | 0.35 | 1.00 |
| ZK701     | Tieshan  | Nanyuan       | Unavaiaible | Unavaiaible | Rhyolitic tuff | 21 | 21 | 173.6 | 0.8 | 0.46 | 0.77 | 0.75 |

N10, Fuan (Li et al., 2009)

|           |        |              |             |             |            |    |    |       |     |      |      |      |
|-----------|--------|--------------|-------------|-------------|------------|----|----|-------|-----|------|------|------|
| T204-9400 | Shekou | Basal Shekou | Unavaiaible | Unavaiaible | Andesite   | 17 | 14 | 158.2 | 6.2 | 3.92 | 2.80 | 0.00 |
| T204-9401 | Shekou | Top Shekou   | Unavaiaible | Unavaiaible | Ignimbrite | 17 | 10 | 147.3 | 3.9 | 2.65 | 0.60 | 0.80 |

N11, Zherong (Liu et al., 2016)

|      |            |               |          |           |            |    |    |       |     |      |      |      |
|------|------------|---------------|----------|-----------|------------|----|----|-------|-----|------|------|------|
| NY03 | Xianyuanli | Basal Xiaoxi  | 271523.9 | 1195459.5 | Tuff       | 18 | 18 | 129.7 | 1.4 | 1.08 | 0.25 | 1.00 |
| NY04 | Xianyuanli | Lower Xiaoxi  | 271540.5 | 1195457.3 | Tuff       | 13 | 13 | 128.5 | 1.1 | 0.86 | 0.62 | 0.83 |
| NY05 | Xianyuanli | Lower Xiaoxi  | 271618.8 | 1195526.7 | Tuff       | 16 | 12 | 130.3 | 2.2 | 1.69 | 0.14 | 1.00 |
| NY08 | Xianyuanli | Middle Xiaoxi | 271621.1 | 1195527.2 | Ignimbrite | 16 | 16 | 129.6 | 1.3 | 1.00 | 0.50 | 0.94 |

|                                                                                                                 |            |                   |            |            |            |    |    |       |     |      |      |      |
|-----------------------------------------------------------------------------------------------------------------|------------|-------------------|------------|------------|------------|----|----|-------|-----|------|------|------|
| NY09                                                                                                            | Xianyuanli | Middle Xiaoxi     | 271627.9   | 1195523.6  | Ignimbrite | 18 | 17 | 129.8 | 1.4 | 1.08 | 0.48 | 0.96 |
| NY10                                                                                                            | Xianyuanli | Middle Xiaoxi     | 271643.5   | 1195538.5  | Rhyolite   | 20 | 14 | 128.1 | 1.6 | 1.25 | 0.20 | 1.00 |
| SMS01                                                                                                           | Xianyuanli | Upper Xiaoxi      | 271653.9   | 1195601.3  | Rhyolite   | 18 | 17 | 128.2 | 1.0 | 0.78 | 0.56 | 0.91 |
| SMS03                                                                                                           | Xianyuanli | Top Xiaoxi        | 271702.9   | 1195623.2  | Rhyolite   | 16 | 14 | 126.7 | 1.5 | 1.18 | 0.29 | 1.00 |
| N12, Minqing (Liu et al., 2016)                                                                                 |            |                   |            |            |            |    |    |       |     |      |      |      |
| NY11                                                                                                            | Chiyuan    | Changlin          | 260734.2   | 1184235.6  | Ignimbrite | 20 | 20 | 138.8 | 1.2 | 0.86 | 0.14 | 1.00 |
| NY12                                                                                                            | Chiyuan    | Changlin          | 260713.0   | 1184222.3  | Ignimbrite | 20 | 20 | 147.9 | 1.4 | 0.95 | 0.28 | 1.00 |
| FK01                                                                                                            | Chiyuan    | Changlin          | 260629.3   | 1184133.2  | Ignimbrite | 20 | 15 | 153.3 | 2.0 | 1.30 | 0.20 | 1.00 |
| FK02                                                                                                            | Chiyuan    | Changlin          | 260620.8   | 1184129.1  | Tuff       | 20 | 20 | 156.6 | 1.4 | 0.89 | 0.12 | 1.00 |
| FK03                                                                                                            | Chiyuan    | Changlin          | 260431.5   | 1184026.6  | Tuff       | 20 | 18 | 159.5 | 1.9 | 1.19 | 0.16 | 1.00 |
| N13, Minhou (former four from Liu et al., 2016; the left from Guo et al., 2012)                                 |            |                   |            |            |            |    |    |       |     |      |      |      |
| NY14                                                                                                            | Ezhai      | Middle Shimaoshan | 260657.7   | 1185600.1  | Ignimbrite | 20 | 20 | 98.7  | 1.1 | 1.11 | 0.25 | 1.00 |
| NY15                                                                                                            | Ezhai      | Middle Shimaoshan | 260654.9   | 1185556.8  | Tuff       | 20 | 17 | 100.2 | 1.4 | 1.40 | 0.29 | 0.99 |
| NY16                                                                                                            | Ezhai      | Middle Shimaoshan | 260654.9   | 1185556.8  | Tuff       | 20 | 19 | 98.4  | 1.0 | 1.00 | 0.81 | 0.69 |
| NY17                                                                                                            | Ezhai      | Middle Shimaoshan | 260637.4   | 1185552.2  | Tuff       | 20 | 20 | 97.6  | 1.2 | 1.23 | 1.50 | 0.08 |
| 09GF-84A                                                                                                        | Dazhangshu | Top Shimaoshan    | 260622.0   | 1185425.0  | Tuff       | 16 | 16 | 98.9  | 0.8 | 0.76 | 0.38 | 0.98 |
| 09GF-96                                                                                                         | Dazhangshu | Shimaoshan        | 260646.0   | 1185513.0  | Rhyolite   | 24 | 18 | 100.4 | 0.8 | 0.82 | 0.36 | 0.99 |
| 09GF-103                                                                                                        | Dazhangshu | Shimaoshan        | 260625.0   | 1185535.0  | Rhyolite   | 24 | 22 | 99.1  | 0.8 | 0.79 | 1.03 | 0.42 |
| 09GF-104A                                                                                                       | Dazhangshu | Basal Shimaoshan  | 260607.0   | 1185532.0  | Rhyolite   | 16 | 16 | 97.8  | 0.8 | 0.77 | 0.69 | 0.80 |
| 09GF-108A                                                                                                       | Baiyanshan | Upper Shimaoshan  | 260425.5   | 1185156.8  | Tuff       | 14 | 14 | 99.3  | 0.8 | 0.84 | 0.30 | 0.99 |
| 09GF-113A                                                                                                       | Baiyanshan | Lower Shimaoshan  | 260459.0   | 1185124.0  | Rhyolite   | 34 | 9  | 98.8  | 2.3 | 2.33 | 0.33 | 0.97 |
| 09GF-115A                                                                                                       | Baiyanshan | Middle Shimaoshan | 260520.0   | 1185111.0  | Dacite     | 22 | 3  | 95.3  | 3.4 | 3.57 | 0.29 | 0.75 |
| 09GF-118A                                                                                                       | Baiyanshan | Shimaoshan        | 260519.0   | 1185111.0  | Rhyolite   | 24 | 21 | 96.5  | 1.0 | 1.04 | 0.63 | 0.89 |
| 09GF-126A                                                                                                       | Baiyanshan | Nanyuan           | 260533.0   | 1184921.0  | Dacite     | 15 | 15 | 140.6 | 1.1 | 0.78 | 0.82 | 0.65 |
| N14, Yongtai (Guo et al., 2012)                                                                                 |            |                   |            |            |            |    |    |       |     |      |      |      |
| 09GF-70                                                                                                         | Yongtai    | Shimaoshan        | 254934.0   | 1185243.0  | Dacite     | 24 | 19 | 96.8  | 1.0 | 0.99 | 0.63 | 0.88 |
| 09GF-55                                                                                                         | Yongtai    | Shimaoshan        | 254939.0   | 1184832.0  | Dacite     | 20 | 17 | 91.3  | 1.5 | 1.64 | 0.71 | 0.78 |
| N15, Fuqing (Liu et al., 2016)                                                                                  |            |                   |            |            |            |    |    |       |     |      |      |      |
| NY18                                                                                                            | Huangkeng  | Basal Shimaoshan  | 254155.2   | 1191220.6  | Tuff       | 19 | 19 | 111.2 | 1.1 | 0.99 | 0.12 | 1.00 |
| SMS04                                                                                                           | Huangkeng  | Lower Shimaoshan  | 254222.8   | 1191251.9  | Tuff       | 20 | 18 | 110.7 | 1.1 | 0.99 | 0.13 | 1.00 |
| SMS06                                                                                                           | Huangkeng  | Middle Shimaoshan | 254302.5   | 1191255.0  | Tuff       | 20 | 15 | 111.1 | 1.8 | 1.62 | 0.14 | 1.00 |
| SMS07                                                                                                           | Huangkeng  | Middle Shimaoshan | 254306.5   | 1191259.7  | Tuff       | 18 | 18 | 106.7 | 1.5 | 1.41 | 0.11 | 1.00 |
| SMS08                                                                                                           | Huangkeng  | Middle Shimaoshan | 254323.5   | 1191247.0  | Tuff       | 20 | 20 | 106.9 | 0.7 | 0.66 | 0.24 | 1.00 |
| SMS10                                                                                                           | Huangkeng  | Upper Shimaoshan  | 254351.3   | 1191234.5  | Rhyolite   | 19 | 19 | 105.4 | 0.5 | 0.48 | 0.58 | 0.92 |
| SMS11                                                                                                           | Huangkeng  | Upper Shimaoshan  | 254414.2   | 1191220.8  | Rhyolite   | 15 | 15 | 92.0  | 1.2 | 1.30 | 4.00 | 0.00 |
| N16, Dehua (former three from Guo et al., 2012; the left from Liu et al., 2016)                                 |            |                   |            |            |            |    |    |       |     |      |      |      |
| 08JH-440                                                                                                        | Chishui    | Upper Nanyuan     | 253750.0   | 1180459.0  | Rhyolite   | 24 | 17 | 130.9 | 1.5 | 1.15 | 0.17 | 1.00 |
| 08JH-454                                                                                                        | Chishui    | Lower Nanyuan     | 254224.0   | 1180818.0  | Rhyolite   | 24 | 19 | 141.6 | 1.5 | 1.06 | 0.61 | 0.89 |
| 08JH-460                                                                                                        | Chishui    | Middle Nanyuan    | 253949.0   | 1180757.0  | Dacite     | 20 | 19 | 132.8 | 0.9 | 0.68 | 0.28 | 1.00 |
| NY23                                                                                                            | Chishui    | Lower Chishui     | 253917.3   | 1180751.2  | Ignimbrite | 16 | 16 | 145.0 | 1.0 | 0.68 | 0.18 | 1.00 |
| NY25                                                                                                            | Chishui    | Lower Chishui     | 253917.3   | 1180751.2  | Dacite     | 18 | 18 | 143.9 | 0.9 | 0.64 | 0.44 | 0.98 |
| NY26                                                                                                            | Chishui    | Middle Chishui    | 253948.8   | 1180756.6  | Ignimbrite | 16 | 16 | 143.0 | 1.0 | 0.70 | 0.32 | 0.99 |
| NY27                                                                                                            | Chishui    | Upper Chishui     | 254027.9   | 1180806.8  | Ignimbrite | 18 | 17 | 141.6 | 0.8 | 0.56 | 0.62 | 0.87 |
| NY28                                                                                                            | Chishui    | Upper Chishui     | 254105.5   | 1180817.2  | Ignimbrite | 20 | 20 | 142.4 | 1.3 | 0.91 | 0.35 | 1.00 |
| N17, Caixi (former three from Liu et al., 2016; the left from Guo et al., 2012)                                 |            |                   |            |            |            |    |    |       |     |      |      |      |
| SMS12                                                                                                           | Caixi      | Shimaoshan        | 253329.2   | 1183854.4  | Rhyolite   | 20 | 19 | 111.8 | 1.1 | 0.98 | 0.50 | 0.96 |
| SMS14                                                                                                           | Caixi      | Shimaoshan        | 253218.1   | 1184039.3  | Rhyolite   | 13 | 12 | 92.7  | 1.4 | 1.51 | 0.45 | 0.93 |
| 08JH-427                                                                                                        | Shiniushan | Nanyuan           | 253252.0   | 1182558.0  | Tuff       | 24 | 17 | 136.1 | 1.2 | 0.88 | 0.40 | 0.98 |
| 08JH-430                                                                                                        | Shiniushan | Lower Shimaoshan  | 253908.0   | 1182728.0  | Dacite     | 24 | 21 | 95.3  | 1.2 | 1.26 | 0.85 | 0.65 |
| 09GF-31A                                                                                                        | Shiniushan | Top Shimaoshan    | 253718.0   | 1182824.0  | Rhyolite   | 16 | 16 | 94.9  | 0.8 | 0.80 | 0.57 | 0.90 |
| 09GF-38                                                                                                         | 09GF-39    | 09GF-40           | 253822.0   | 1182824.0  | Dacite     | 24 | 18 | 96.7  | 1.2 | 1.24 | 0.23 | 1.00 |
| 09GF-42                                                                                                         | 09GF-39    | 09GF-40           | 253818.0   | 1182824.0  | Dacite     | 24 | 20 | 97.3  | 1.2 | 1.23 | 0.46 | 0.98 |
| N18, Xianyou (former two from Li et al., 2009; last four from Liu et al., 2016; the left from Guo et al., 2012) |            |                   |            |            |            |    |    |       |     |      |      |      |
| T207-3706                                                                                                       | Yuanzhuang | Nanyuan           | Unavaialbe | Unavaialbe | Basalt     | 10 | 8  | 147.0 | 9.8 | 6.67 | 4.00 | 0.00 |
| T207-3710                                                                                                       | Yuanzhuang | Nanyuan           | Unavaialbe | Unavaialbe | Ignimbrite | 15 | 14 | 130.4 | 3.7 | 2.84 | 1.20 | 0.24 |
| 08JH-396                                                                                                        | Yuanzhuang | Nanyuan           | 251106.0   | 1184518.0  | Rhyolite   | 22 | 19 | 131.0 | 1.4 | 1.07 | 0.99 | 0.46 |
| 08JH-400                                                                                                        | Yuanzhuang | Nanyuan           | 251013.0   | 1184215.0  | Rhyolite   | 18 | 18 | 133.9 | 1.0 | 0.71 | 0.69 | 0.81 |
| 08JH-408                                                                                                        | Yuanzhuang | Top Nanyuan       | 251025.0   | 1184248.0  | Tuff       | 24 | 18 | 130.8 | 1.4 | 1.07 | 0.42 | 0.98 |
| 08JH-410                                                                                                        | Yuanzhuang | Middle Nanyuan    | 251105.0   | 1184326.0  | Tuff       | 24 | 15 | 133.1 | 1.8 | 1.35 | 0.32 | 0.99 |
| 08JH-415                                                                                                        | Yuanzhuang | Nanyuan           | 251118.0   | 1184326.0  | Rhyolite   | 18 | 16 | 131.4 | 1.0 | 0.76 | 0.48 | 0.95 |
| 08JH-419                                                                                                        | Yuanzhuang | Basal Nanyuan     | 251141.0   | 1184409.0  | Basalt     | 20 | 9  | 143.0 | 2.8 | 1.96 | 2.80 | 0.00 |
| 08JH-421                                                                                                        | Yuanzhuang | Lower Nanyuan     | 250836.0   | 1183943.0  | Rhyolite   | 24 | 20 | 133.8 | 1.8 | 1.35 | 1.60 | 0.67 |
| 08JH-425                                                                                                        | Yuanzhuang | Nanyuan           | 250824.0   | 1183943.0  | Rhyolite   | 24 | 17 | 135.0 | 1.5 | 1.11 | 0.97 | 0.49 |
| NY19                                                                                                            | Yuanzhuang | Basal Nanyuan     | 251207.4   | 1184346.6  | Ignimbrite | 18 | 15 | 131.3 | 2.0 | 1.52 | 0.13 | 1.00 |
| NY20                                                                                                            | Yuanzhuang | Middle Nanyuan    | 251147.9   | 1184317.8  | Ignimbrite | 18 | 15 | 130.8 | 1.9 | 1.45 | 0.67 | 0.81 |
| NY21                                                                                                            | Yuanzhuang | Middle Nanyuan    | 251149.2   | 1184301.8  | Ignimbrite | 16 | 13 | 131.4 | 1.8 | 1.37 | 0.38 | 0.97 |
| NY22                                                                                                            | Yuanzhuang | Lower Nanyuan     | 251200.2   | 1184332.4  | Ignimbrite | 18 | 16 | 130.5 | 1.7 | 1.30 | 0.56 | 0.91 |
| N19, Tongan (Guo et al., 2012)                                                                                  |            |                   |            |            |            |    |    |       |     |      |      |      |
| 08JH334                                                                                                         | Tongan     | Douling           | 244715.0   | 1175001.0  | Rhyolite   | 24 | 21 | 157.8 | 1.7 | 1.08 | 1.17 | 0.27 |

|                               |            |                  |          |           |          |    |    |       |     |      |      |      |
|-------------------------------|------------|------------------|----------|-----------|----------|----|----|-------|-----|------|------|------|
| 08JH351                       | Tongan     | Shimaoshan       | 244542.0 | 1180621.0 | Dacite   | 24 | 10 | 93.0  | 1.8 | 1.94 | 1.09 | 0.37 |
| N20 Pinghe (Guo et al., 2012) |            |                  |          |           |          |    |    |       |     |      |      |      |
| 08JH229                       | Pinghe     | Douling          | 242335.0 | 1171317.0 | Rhyolite | 23 | 19 | 157.0 | 1.3 | 0.83 | 1.40 | 0.14 |
| 08JH239                       | Pinghe     | Shimaoshan       | 241751.0 | 1174117.0 | Rhyolite | 24 | 8  | 103.3 | 2.6 | 2.52 | 0.22 | 0.97 |
| 08JH439                       | Shiniushan | Basal Shimaoshan | 241751.0 | 1174117.0 | Rhyolite | 23 | 23 | 94.6  | 1.0 | 1.06 | 1.09 | 0.35 |

#### Guangdong province

##### N21, Fengshun, (Guo et al., 2012)

|          |          |                |          |           |            |    |    |       |     |      |      |      |
|----------|----------|----------------|----------|-----------|------------|----|----|-------|-----|------|------|------|
| 09GF-5   | Fengshun | Lower Douling  | 234940.0 | 1160726.0 | Rhyolite   | 24 | 17 | 144.8 | 1.7 | 1.17 | 1.80 | 0.02 |
| 09GF-9   | Fengshun | Middle Douling | 235118.0 | 1160635.0 | Dacite     | 24 | 18 | 143.3 | 0.9 | 0.64 | 0.68 | 0.84 |
| 09GF-14A | Fengshun | Upper Fengshun | 235225.0 | 1160538.0 | Dacite     | 16 | 16 | 139.4 | 1.0 | 0.72 | 0.44 | 0.97 |
| 09GF-21A | Fengshun | Basal Douling  | 235750.0 | 1161139.0 | Prophyrite | 16 | 16 | 149.0 | 1.5 | 1.01 | 1.60 | 0.08 |
| 08JH153  | Fengshun | Douling        | 235425.0 | 1162301.0 | Dacite     | 24 | 17 | 168.2 | 1.1 | 0.65 | 1.07 | 0.38 |
| 08JH187  | Fengshun | Fengshun       | 235243.0 | 1172325.0 | Rhyolite   | 24 | 19 | 142.7 | 1.0 | 0.70 | 1.40 | 0.14 |
| 08JH212  | Fengshun | Fengshun       | 240521.0 | 1170518.0 | Dacite     | 21 | 19 | 164.8 | 1.4 | 0.85 | 0.33 | 1.00 |

Notes:

1, in supplementary figures and tables, samples of locations / basins L1 to L10 are mainly from the combination of this work (shadowed in greenish yellow) and Li et al. (2019) in SHTZ, M1 to M12 from former work in SHTZ, and N1 to N20 from former work in CZ.

2, amounts of analyzed zircons.

3, amounts of concordant grains from all analyzed zircons.

4, errors of  $1\sigma$ /age in percent

5. location numbers, main location names, and references of data



Table S2 Details of single zircon U-Pb isotope ages of volcanic and pyroclastic rocks from this and former works in SHTZ, South China

| Ino.                                                 | Sample     | Th<br>(ppm,<br>x10 <sup>-6</sup> ) | U<br>(ppm,<br>x10 <sup>-6</sup> ) | Th/U | <sup>207</sup> Pb/<br><sup>206</sup> Pb | 1σ      | <sup>207</sup> Pb/<br><sup>235</sup> U | 1σ      | <sup>206</sup> Pb/<br><sup>238</sup> U | 1σ      | <sup>208</sup> Pb/<br><sup>232</sup> Th | 1σ      | ρ    | <sup>207</sup> Pb/<br><sup>206</sup> Pb | 1σ  | <sup>207</sup> Pb/<br><sup>235</sup> U | 1σ | <sup>206</sup> Pb/<br><sup>238</sup> U | 1σ  | <sup>208</sup> Pb/<br><sup>232</sup> Th | 1σ | <sup>2</sup> Cord |
|------------------------------------------------------|------------|------------------------------------|-----------------------------------|------|-----------------------------------------|---------|----------------------------------------|---------|----------------------------------------|---------|-----------------------------------------|---------|------|-----------------------------------------|-----|----------------------------------------|----|----------------------------------------|-----|-----------------------------------------|----|-------------------|
| 31.Zhejiang province                                 |            |                                    |                                   |      |                                         |         |                                        |         |                                        |         |                                         |         |      |                                         |     |                                        |    |                                        |     |                                         |    |                   |
| L1, Tongjia-Yanxia of Shouchang town in Jiande Basin |            |                                    |                                   |      |                                         |         |                                        |         |                                        |         |                                         |         |      |                                         |     |                                        |    |                                        |     |                                         |    |                   |
| A1                                                   | H01-02-1   | 2541                               | 1121                              | 2.27 | 0.07487                                 | 0.00123 | 0.23077                                | 0.00421 | 0.02236                                | 0.00033 | 0.00346                                 | 0.00018 | 0.52 | 1065                                    | 34  | 211                                    | 3  | 143                                    | 2.0 | 70                                      | 4  | 0.7               |
|                                                      | 1101-02-2  | 739                                | 432                               | 1.71 | 0.04678                                 | 0.00150 | 0.13852                                | 0.00453 | 0.02148                                | 0.00033 | 0.00279                                 | 0.00016 | 0.28 | 38                                      | 69  | 132                                    | 4  | 137                                    | 2.0 | 56                                      | 3  | 1.0               |
|                                                      | H01-02-3   | 756                                | 312                               | 2.42 | 0.13460                                 | 0.00692 | 0.43633                                | 0.02111 | 0.02351                                | 0.00041 | 0.00666                                 | 0.00011 | 0.59 | 2178                                    | 83  | 372                                    | 14 | 150                                    | 3.0 | 134                                     | 2  | 0.4               |
|                                                      | 1101-02-4  | 558                                | 272                               | 2.05 | 0.04641                                 | 0.00260 | 0.13593                                | 0.00755 | 0.02125                                | 0.00039 | 0.00186                                 | 0.00011 | 0.14 | 19                                      | 122 | 129                                    | 7  | 136                                    | 2.0 | 38                                      | 2  | 1.1               |
|                                                      | H01-02-5   | 548                                | 201                               | 2.73 | 0.14513                                 | 0.00340 | 0.47914                                | 0.01146 | 0.02395                                | 0.00038 | 0.00627                                 | 0.00040 | 0.36 | 2289                                    | 41  | 397                                    | 8  | 153                                    | 2.0 | 126                                     | 8  | 0.4               |
|                                                      | 1101-02-6  | 201                                | 85                                | 2.36 | 0.05058                                 | 0.00552 | 0.14774                                | 0.01607 | 0.02119                                | 0.00041 | 0.00306                                 | 0.00027 | 0.07 | 222                                     | 245 | 140                                    | 14 | 135                                    | 3.0 | 62                                      | 5  | 1.0               |
|                                                      | 1101-02-7  | 1163                               | 217                               | 5.36 | 0.04882                                 | 0.00273 | 0.13456                                | 0.00754 | 0.01999                                | 0.00033 | 0.00574                                 | 0.00085 | 0.15 | 139                                     | 127 | 128                                    | 7  | 128                                    | 2.0 | 116                                     | 17 | 1.0               |
|                                                      | H01-02-8   | 239                                | 224                               | 1.07 | 0.05290                                 | 0.00114 | 0.51557                                | 0.01180 | 0.07071                                | 0.00105 | 0.01209                                 | 0.00105 | 0.41 | 325                                     | 50  | 422                                    | 8  | 440                                    | 6.0 | 243                                     | 21 | 1.0               |
|                                                      | 1101-02-9  | 107                                | 51                                | 2.11 | 0.04816                                 | 0.00943 | 0.13555                                | 0.02644 | 0.02042                                | 0.00050 | 0.00407                                 | 0.00046 | 0.03 | 107                                     | 348 | 129                                    | 24 | 130                                    | 3.0 | 82                                      | 9  | 1.0               |
|                                                      | 1101-02-10 | 751                                | 245                               | 3.06 | 0.04330                                 | 0.00237 | 0.12615                                | 0.00690 | 0.02114                                | 0.00035 | 0.00351                                 | 0.00033 | 0.15 | -107                                    | 121 | 121                                    | 6  | 135                                    | 2.0 | 71                                      | 7  | 1.1               |
|                                                      | 1101-02-11 | 547                                | 176                               | 3.11 | 0.04560                                 | 0.00280 | 0.13765                                | 0.00846 | 0.02189                                | 0.00037 | 0.00304                                 | 0.00025 | 0.14 | -23                                     | 134 | 131                                    | 8  | 140                                    | 2.0 | 61                                      | 5  | 1.1               |
|                                                      | 1101-02-12 | 1192                               | 256                               | 4.66 | 0.04455                                 | 0.00220 | 0.13459                                | 0.00667 | 0.02191                                | 0.00036 | 0.00299                                 | 0.00024 | 0.18 | -42                                     | 106 | 128                                    | 6  | 140                                    | 2.0 | 60                                      | 5  | 1.1               |
|                                                      | 1101-02-13 | 1440                               | 374                               | 3.85 | 0.04563                                 | 0.00155 | 0.13808                                | 0.00477 | 0.02195                                | 0.00034 | 0.00315                                 | 0.00028 | 0.26 | -22                                     | 70  | 131                                    | 4  | 140                                    | 2.0 | 64                                      | 6  | 1.1               |
|                                                      | 1101-02-14 | 1547                               | 240                               | 6.43 | 0.05833                                 | 0.00215 | 0.17796                                | 0.00663 | 0.02213                                | 0.00036 | 0.00324                                 | 0.00030 | 0.24 | 542                                     | 83  | 166                                    | 6  | 141                                    | 2.0 | 65                                      | 6  | 0.8               |
|                                                      | H01-02-15  | 2955                               | 1796                              | 1.65 | 0.05018                                 | 0.00151 | 0.17161                                | 0.00517 | 0.02481                                | 0.00045 | 0.00136                                 | 0.00010 | 0.30 | 203                                     | 71  | 161                                    | 4  | 158                                    | 3.0 | 27                                      | 2  | 1.0               |
| A2                                                   | 0128-02-1  | 320                                | 73                                | 4.38 | 0.03999                                 | 0.00266 | 0.11500                                | 0.00756 | 0.02086                                | 0.00038 | 0.00558                                 | 0.00031 | 0.10 | -290                                    | 147 | 111                                    | 7  | 133                                    | 2.0 | 112                                     | 6  | 1.2               |
|                                                      | 0128-02-2  | 509                                | 135                               | 3.76 | 0.04887                                 | 0.00263 | 0.14192                                | 0.00744 | 0.02107                                | 0.00046 | 0.00151                                 | 0.00007 | 0.14 | 142                                     | 123 | 135                                    | 7  | 134                                    | 3.0 | 30                                      | 1  | 1.0               |
|                                                      | 0128-02-3  | 1639                               | 533                               | 3.07 | 0.05025                                 | 0.00128 | 0.13967                                | 0.00364 | 0.02016                                | 0.00031 | 0.00329                                 | 0.00014 | 0.33 | 207                                     | 60  | 133                                    | 3  | 129                                    | 2.0 | 66                                      | 3  | 1.0               |
|                                                      | 0128-02-4  | 1463                               | 446                               | 3.28 | 0.04799                                 | 0.00085 | 0.14130                                | 0.00263 | 0.02135                                | 0.00028 | 0.00520                                 | 0.00021 | 0.42 | 99                                      | 43  | 134                                    | 2  | 136                                    | 2.0 | 105                                     | 4  | 1.0               |
|                                                      | 0128-02-5  | 483                                | 93                                | 5.17 | 0.05006                                 | 0.00228 | 0.14078                                | 0.00626 | 0.02040                                | 0.00036 | 0.00613                                 | 0.00041 | 0.14 | 198                                     | 107 | 134                                    | 6  | 130                                    | 2.0 | 124                                     | 8  | 1.0               |
|                                                      | 0128-02-6  | 223                                | 66                                | 3.36 | 0.04889                                 | 0.00261 | 0.14265                                | 0.00746 | 0.02116                                | 0.00040 | 0.00422                                 | 0.00022 | 0.12 | 143                                     | 122 | 135                                    | 7  | 135                                    | 3.0 | 85                                      | 4  | 1.0               |
|                                                      | 0128-02-7  | 339                                | 66                                | 5.10 | 0.05030                                 | 0.00253 | 0.14495                                | 0.00714 | 0.02090                                | 0.00039 | 0.00417                                 | 0.00019 | 0.13 | 209                                     | 117 | 137                                    | 6  | 133                                    | 2.0 | 84                                      | 4  | 1.0               |
|                                                      | 0128-02-8  | 1153                               | 186                               | 6.19 | 0.04878                                 | 0.00120 | 0.13862                                | 0.00349 | 0.02061                                | 0.00030 | 0.00328                                 | 0.00011 | 0.33 | 137                                     | 59  | 132                                    | 3  | 132                                    | 2.0 | 66                                      | 2  | 1.0               |
|                                                      | 0128-02-9  | 341                                | 104                               | 3.27 | 0.04927                                 | 0.00184 | 0.14081                                | 0.00522 | 0.02072                                | 0.00034 | 0.00351                                 | 0.00014 | 0.20 | 161                                     | 88  | 134                                    | 5  | 132                                    | 2.0 | 71                                      | 3  | 1.0               |
|                                                      | 0128-02-10 | 297                                | 77                                | 3.84 | 0.05206                                 | 0.00227 | 0.15303                                | 0.00653 | 0.02132                                | 0.00037 | 0.00616                                 | 0.00038 | 0.15 | 288                                     | 102 | 145                                    | 6  | 136                                    | 2.0 | 124                                     | 8  | 0.9               |
|                                                      | 0128-02-11 | 407                                | 69                                | 5.92 | 0.05102                                 | 0.00234 | 0.14356                                | 0.00649 | 0.02041                                | 0.00037 | 0.00295                                 | 0.00012 | 0.16 | 242                                     | 108 | 136                                    | 6  | 130                                    | 2.0 | 60                                      | 2  | 1.0               |
|                                                      | 0128-02-12 | 445                                | 133                               | 3.36 | 0.04322                                 | 0.00302 | 0.11799                                | 0.00801 | 0.01981                                | 0.00048 | 0.00158                                 | 0.00011 | 0.10 | -111                                    | 147 | 113                                    | 7  | 126                                    | 3.0 | 32                                      | 2  | 1.1               |
|                                                      | 0128-02-13 | 349                                | 89                                | 3.94 | 0.05208                                 | 0.00186 | 0.14702                                | 0.00518 | 0.02047                                | 0.00032 | 0.00523                                 | 0.00028 | 0.19 | 289                                     | 84  | 139                                    | 5  | 131                                    | 2.0 | 105                                     | 6  | 0.9               |
|                                                      | 0128-02-14 | 634                                | 174                               | 3.64 | 0.04810                                 | 0.00213 | 0.14003                                | 0.00609 | 0.02111                                | 0.00039 | 0.00344                                 | 0.00023 | 0.17 | 104                                     | 100 | 133                                    | 5  | 135                                    | 2.0 | 69                                      | 5  | 1.0               |
|                                                      | 0128-02-15 | 544                                | 142                               | 3.84 | 0.04929                                 | 0.00154 | 0.13749                                | 0.00430 | 0.02023                                | 0.00031 | 0.00408                                 | 0.00021 | 0.25 | 162                                     | 74  | 131                                    | 4  | 129                                    | 2.0 | 82                                      | 4  | 1.0               |
| A3                                                   | 0128-04-1  | 140                                | 80                                | 1.74 | 0.04658                                 | 0.00265 | 0.12608                                | 0.00682 | 0.01963                                | 0.00034 | 0.00625                                 | 0.00032 | 0.38 | 28                                      | 124 | 121                                    | 6  | 125                                    | 2.0 | 126                                     | 6  | 1.0               |
|                                                      | 0128-04-2  | 238                                | 134                               | 1.78 | 0.05109                                 | 0.00206 | 0.13942                                | 0.00549 | 0.01980                                | 0.00033 | 0.00672                                 | 0.00041 | 0.15 | 245                                     | 95  | 133                                    | 5  | 126                                    | 2.0 | 135                                     | 8  | 0.9               |
|                                                      | 0128-04-3  | 546                                | 293                               | 1.86 | 0.04888                                 | 0.00108 | 0.13561                                | 0.00309 | 0.02012                                | 0.00029 | 0.00487                                 | 0.00017 | 0.36 | 142                                     | 53  | 129                                    | 3  | 128                                    | 2.0 | 98                                      | 3  | 1.0               |
|                                                      | H028-04-4  | 346                                | 259                               | 1.34 | 0.05004                                 | 0.00204 | 0.19900                                | 0.00791 | 0.02885                                | 0.00059 | 0.00176                                 | 0.00009 | 0.21 | 197                                     | 96  | 184                                    | 7  | 183                                    | 4.0 | 36                                      | 2  | 1.0               |
|                                                      | 0128-04-5  | 866                                | 501                               | 1.73 | 0.04860                                 | 0.00107 | 0.14654                                | 0.00339 | 0.02187                                | 0.00034 | 0.00257                                 | 0.00008 | 0.41 | 129                                     | 53  | 139                                    | 3  | 139                                    | 2.0 | 52                                      | 2  | 1.0               |
|                                                      | 0128-04-6  | 424                                | 161                               | 2.63 | 0.05153                                 | 0.00201 | 0.14672                                | 0.00566 | 0.02065                                | 0.00037 | 0.00398                                 | 0.00018 | 0.21 | 265                                     | 92  | 139                                    | 5  | 132                                    | 2.0 | 80                                      | 4  | 0.9               |
|                                                      | 0128-04-7  | 180                                | 114                               | 1.58 | 0.05047                                 | 0.00146 | 0.13473                                | 0.00393 | 0.01936                                | 0.00029 | 0.00337                                 | 0.00011 | 0.27 | 217                                     | 69  | 128                                    | 4  | 124                                    | 2.0 | 68                                      | 2  | 1.0               |
|                                                      | 0128-04-8  | 136                                | 71                                | 1.91 | 0.04956                                 | 0.00226 | 0.14420                                | 0.00647 | 0.02111                                | 0.00038 | 0.00463                                 | 0.00023 | 0.16 | 174                                     | 106 | 137                                    | 6  | 135                                    | 2.0 | 93                                      | 5  | 1.0               |
|                                                      | 0128-04-9  | 177                                | 76                                | 2.32 | 0.04843                                 | 0.00458 | 0.13852                                | 0.01296 | 0.02074                                | 0.00047 | 0.00357                                 | 0.00017 | 0.08 | 120                                     | 210 | 132                                    | 12 | 132                                    | 3.0 | 72                                      | 3  | 1.0               |
|                                                      | 0128-04-10 | 580                                | 202                               | 2.87 | 0.04911                                 | 0.00190 | 0.15465                                | 0.00593 | 0.02284                                | 0.00043 | 0.00207                                 | 0.00009 | 0.23 | 153                                     | 90  | 146                                    | 5  | 146                                    | 3.0 | 42                                      | 2  | 1.0               |
|                                                      | 0128-04-11 | 192                                | 121                               | 1.59 | 0.05408                                 | 0.00227 | 0.15750                                | 0.00649 | 0.02112                                | 0.00041 | 0.00239                                 | 0.00012 | 0.20 | 374                                     | 97  | 149                                    | 6  | 135                                    | 3.0 | 48                                      | 2  | 0.9               |
|                                                      | 0128-04-12 | 606                                | 188                               | 3.23 | 0.04929                                 | 0.00208 | 0.14445                                | 0.00601 | 0.02126                                | 0.00042 | 0.00166                                 | 0.00008 | 0.21 | 162                                     | 98  | 137                                    | 5  | 136                                    | 3.0 | 34                                      | 2  | 1.0               |
|                                                      | 0128-04-13 | 300                                | 189                               | 1.59 | 0.05100                                 | 0.00349 | 0.12999                                | 0.00852 | 0.01850                                | 0.00051 | 0.00097                                 | 0.00009 | 0.10 | 241                                     | 157 | 124                                    | 8  |                                        |     |                                         |    |                   |

|    |          |      |     |      |         |         |         |         |         |         |         |         |      |      |     |     |    |     |      |     |    |     |
|----|----------|------|-----|------|---------|---------|---------|---------|---------|---------|---------|---------|------|------|-----|-----|----|-----|------|-----|----|-----|
|    | ZC-06-14 | 379  | 129 | 2.95 | 0.04975 | 0.00230 | 0.13435 | 0.00606 | 0.01959 | 0.00034 | 0.00519 | 0.00031 | 0.13 | 183  | 108 | 128 | 5  | 125 | 2.0  | 105 | 6  | 1.0 |
|    | ZC-06-15 | 836  | 270 | 3.10 | 0.05019 | 0.00148 | 0.13541 | 0.00397 | 0.01957 | 0.00029 | 0.00540 | 0.00030 | 0.24 | 204  | 70  | 129 | 4  | 125 | 2.0  | 109 | 6  | 1.0 |
|    | ZC-06-16 | 796  | 128 | 6.22 | 0.05099 | 0.00225 | 0.13760 | 0.00594 | 0.01957 | 0.00034 | 0.00539 | 0.00032 | 0.15 | 240  | 104 | 131 | 5  | 125 | 2.0  | 109 | 6  | 1.0 |
| A6 | ZC-10-1  | 177  | 270 | 0.66 | 0.04983 | 0.00156 | 0.27484 | 0.00915 | 0.04037 | 0.00096 | 0.00565 | 0.00036 | 0.44 | 187  | 75  | 247 | 7  | 255 | 6.0  | 114 | 7  | 1.0 |
|    | ZC-10-2  | 333  | 293 | 1.14 | 0.04641 | 0.00132 | 0.13056 | 0.00393 | 0.02056 | 0.00044 | 0.00482 | 0.00021 | 0.43 | 19   | 60  | 125 | 4  | 131 | 3.0  | 97  | 4  | 1.0 |
|    | ZC-10-3  | 200  | 222 | 0.90 | 0.04607 | 0.00192 | 0.12375 | 0.00522 | 0.01974 | 0.00048 | 0.00336 | 0.00019 | 0.31 | 1    | 88  | 118 | 5  | 126 | 3.0  | 68  | 4  | 1.1 |
|    | ZC-10-4  | 221  | 238 | 0.93 | 0.04548 | 0.00157 | 0.12279 | 0.00434 | 0.01980 | 0.00044 | 0.00469 | 0.00023 | 0.35 | -30  | 72  | 118 | 4  | 126 | 3.0  | 95  | 5  | 1.1 |
|    | ZC-10-5  | 423  | 205 | 2.06 | 0.04287 | 0.00237 | 0.11449 | 0.00624 | 0.01967 | 0.00053 | 0.00347 | 0.00024 | 0.22 | -130 | 122 | 110 | 6  | 126 | 3.0  | 70  | 5  | 1.1 |
|    | ZC-10-6  | 343  | 331 | 1.03 | 0.04553 | 0.00123 | 0.11915 | 0.00334 | 0.01918 | 0.00040 | 0.00487 | 0.00022 | 0.42 | -27  | 54  | 114 | 3  | 122 | 3.0  | 98  | 4  | 1.1 |
|    | ZC-10-7  | 863  | 594 | 1.45 | 0.04699 | 0.00128 | 0.11989 | 0.00333 | 0.01864 | 0.00037 | 0.00526 | 0.00029 | 0.38 | 49   | 60  | 115 | 3  | 119 | 2.0  | 106 | 6  | 1.0 |
|    | ZC-10-8  | 323  | 283 | 1.14 | 0.04186 | 0.00158 | 0.10809 | 0.00409 | 0.01901 | 0.00043 | 0.00384 | 0.00023 | 0.30 | -185 | 88  | 104 | 4  | 121 | 3.0  | 77  | 5  | 1.2 |
|    | ZC-10-9  | 333  | 627 | 0.53 | 0.03728 | 0.00147 | 0.09719 | 0.00379 | 0.01915 | 0.00047 | 0.00288 | 0.00025 | 0.30 | -454 | 252 | 94  | 4  | 122 | 3.0  | 58  | 5  | 1.3 |
|    | ZC-10-10 | 323  | 313 | 1.03 | 0.04599 | 0.00160 | 0.10772 | 0.00372 | 0.01716 | 0.00036 | 0.00477 | 0.00029 | 0.29 | -3   | 72  | 104 | 3  | 110 | 2.0  | 96  | 6  | 1.1 |
|    | ZC-10-11 | 489  | 257 | 1.90 | 0.04130 | 0.00153 | 0.09852 | 0.00361 | 0.01748 | 0.00038 | 0.00400 | 0.00023 | 0.28 | -216 | 87  | 95  | 3  | 112 | 2.0  | 81  | 5  | 1.2 |
|    | ZC-10-12 | 119  | 151 | 0.79 | 0.04089 | 0.00208 | 0.09619 | 0.00477 | 0.01721 | 0.00040 | 0.00435 | 0.00031 | 0.18 | -239 | 115 | 93  | 4  | 110 | 3.0  | 88  | 6  | 1.2 |
|    | ZC-10-13 | 293  | 135 | 2.17 | 0.04700 | 0.00329 | 0.11411 | 0.00769 | 0.01760 | 0.00046 | 0.00507 | 0.00047 | 0.09 | 49   | 155 | 110 | 7  | 112 | 3.0  | 102 | 9  | 1.0 |
|    | ZC-10-14 | 314  | 188 | 1.67 | 0.04517 | 0.00209 | 0.10503 | 0.00468 | 0.01687 | 0.00035 | 0.00543 | 0.00039 | 0.15 | -11  | 98  | 101 | 4  | 108 | 2.0  | 109 | 8  | 1.1 |
|    | ZC-10-15 | 424  | 209 | 2.03 | 0.08331 | 0.01653 | 0.21585 | 0.03810 | 0.01841 | 0.00179 | 0.00333 | 0.00250 | 0.04 | 1276 | 428 | 198 | 32 | 118 | 11.0 | 67  | 50 | 0.6 |
| A7 | ZC-11-1  | 98   | 145 | 0.67 | 0.04572 | 0.00324 | 0.11424 | 0.00790 | 0.01813 | 0.00048 | 0.00524 | 0.00026 | 0.13 | -17  | 157 | 110 | 7  | 116 | 3.0  | 106 | 5  | 1.1 |
|    | ZC-11-2  | 247  | 337 | 0.73 | 0.04478 | 0.00240 | 0.10805 | 0.00570 | 0.01752 | 0.00042 | 0.00527 | 0.00023 | 0.19 | -31  | 116 | 104 | 5  | 112 | 3.0  | 106 | 5  | 1.1 |
|    | ZC-11-3  | 96   | 134 | 0.71 | 0.04688 | 0.00251 | 0.11492 | 0.00608 | 0.01782 | 0.00041 | 0.00520 | 0.00019 | 0.19 | 43   | 117 | 110 | 6  | 114 | 3.0  | 105 | 4  | 1.0 |
|    | ZC-11-4  | 131  | 255 | 0.51 | 0.05043 | 0.00185 | 0.13053 | 0.00482 | 0.01883 | 0.00040 | 0.00545 | 0.00018 | 0.30 | 215  | 87  | 125 | 4  | 120 | 3.0  | 110 | 4  | 1.0 |
|    | ZC-11-5  | 41   | 83  | 0.50 | 0.04985 | 0.00626 | 0.12054 | 0.01475 | 0.01771 | 0.00070 | 0.00569 | 0.00052 | 0.08 | 188  | 267 | 116 | 13 | 113 | 4.0  | 115 | 10 | 1.0 |
|    | ZC-11-6  | 72   | 125 | 0.57 | 0.04561 | 0.00273 | 0.11673 | 0.00695 | 0.01862 | 0.00044 | 0.00512 | 0.00023 | 0.19 | -23  | 131 | 112 | 6  | 119 | 3.0  | 103 | 5  | 1.1 |
|    | ZC-11-7  | 185  | 270 | 0.69 | 0.04801 | 0.00203 | 0.12363 | 0.00530 | 0.01872 | 0.00041 | 0.00512 | 0.00020 | 0.28 | 100  | 96  | 118 | 5  | 120 | 3.0  | 103 | 4  | 1.0 |
|    | ZC-11-8  | 223  | 309 | 0.72 | 0.04783 | 0.00222 | 0.12161 | 0.00573 | 0.01850 | 0.00042 | 0.00551 | 0.00025 | 0.27 | 91   | 104 | 117 | 5  | 118 | 3.0  | 111 | 5  | 1.0 |
|    | ZC-11-9  | 88   | 191 | 0.46 | 0.04936 | 0.00235 | 0.12856 | 0.00623 | 0.01893 | 0.00043 | 0.00586 | 0.00027 | 0.27 | 165  | 110 | 123 | 6  | 121 | 3.0  | 118 | 5  | 1.0 |
|    | ZC-11-10 | 40   | 101 | 0.40 | 0.05003 | 0.00434 | 0.13011 | 0.01122 | 0.01888 | 0.00057 | 0.00640 | 0.00046 | 0.16 | 196  | 198 | 124 | 10 | 121 | 4.0  | 129 | 9  | 1.0 |
|    | ZC-11-11 | 173  | 243 | 0.71 | 0.04858 | 0.00375 | 0.12535 | 0.00979 | 0.01881 | 0.00057 | 0.00532 | 0.00044 | 0.22 | 128  | 174 | 120 | 9  | 120 | 4.0  | 107 | 9  | 1.0 |
|    | ZC-11-12 | 67   | 114 | 0.58 | 0.05071 | 0.00368 | 0.13227 | 0.00974 | 0.01900 | 0.00056 | 0.00377 | 0.00022 | 0.24 | 228  | 166 | 126 | 9  | 121 | 4.0  | 76  | 4  | 1.0 |
|    | ZC-11-13 | 219  | 327 | 0.67 | 0.04867 | 0.00289 | 0.12597 | 0.00786 | 0.01878 | 0.00052 | 0.00534 | 0.00036 | 0.33 | 132  | 135 | 120 | 7  | 120 | 3.0  | 108 | 7  | 1.0 |
|    | ZC-11-14 | 57   | 132 | 0.43 | 0.05808 | 0.00877 | 0.15455 | 0.02393 | 0.01957 | 0.00106 | 0.00590 | 0.00086 | 0.24 | 533  | 340 | 146 | 21 | 125 | 7.0  | 119 | 17 | 0.9 |
|    | ZC-11-15 | 125  | 254 | 0.49 | 0.05004 | 0.00471 | 0.12727 | 0.01267 | 0.01843 | 0.00070 | 0.00498 | 0.00055 | 0.33 | 197  | 215 | 122 | 11 | 118 | 4.0  | 100 | 11 | 1.0 |
| A8 | ZC-13-01 | 313  | 81  | 3.87 | 0.05102 | 0.00264 | 0.16729 | 0.00844 | 0.02378 | 0.00045 | 0.00613 | 0.00041 | 0.12 | 242  | 121 | 157 | 7  | 152 | 3.0  | 124 | 8  | 1.0 |
|    | ZC-13-02 | 864  | 451 | 1.91 | 0.04885 | 0.00204 | 0.16194 | 0.00660 | 0.02405 | 0.00041 | 0.00681 | 0.00048 | 0.15 | 141  | 97  | 152 | 6  | 153 | 3.0  | 137 | 10 | 1.0 |
|    | ZC-13-03 | 923  | 513 | 1.80 | 0.05118 | 0.00222 | 0.16712 | 0.00704 | 0.02369 | 0.00042 | 0.00674 | 0.00050 | 0.14 | 249  | 102 | 157 | 6  | 151 | 3.0  | 136 | 10 | 1.0 |
|    | ZC-13-05 | 386  | 88  | 4.38 | 0.04908 | 0.00318 | 0.16031 | 0.01008 | 0.02370 | 0.00051 | 0.00650 | 0.00052 | 0.08 | 152  | 147 | 151 | 9  | 151 | 3.0  | 131 | 10 | 1.0 |
|    | ZC-13-06 | 1438 | 268 | 5.36 | 0.05110 | 0.00183 | 0.16788 | 0.00590 | 0.02383 | 0.00038 | 0.00663 | 0.00039 | 0.18 | 245  | 84  | 158 | 5  | 152 | 2.0  | 134 | 8  | 1.0 |
|    | ZC-13-07 | 256  | 62  | 4.10 | 0.05919 | 0.00209 | 0.52298 | 0.01805 | 0.06409 | 0.00103 | 0.01785 | 0.00109 | 0.18 | 574  | 79  | 427 | 12 | 400 | 6.0  | 358 | 22 | 0.9 |
|    | ZC-13-08 | 872  | 240 | 3.64 | 0.05035 | 0.00142 | 0.16513 | 0.00463 | 0.02379 | 0.00034 | 0.00632 | 0.00039 | 0.24 | 211  | 67  | 155 | 4  | 152 | 2.0  | 127 | 8  | 1.0 |
|    | ZC-13-09 | 555  | 145 | 3.82 | 0.05533 | 0.00203 | 0.17998 | 0.00645 | 0.02359 | 0.00038 | 0.00647 | 0.00042 | 0.17 | 426  | 84  | 168 | 6  | 150 | 2.0  | 130 | 8  | 0.9 |
|    | ZC-13-10 | 1763 | 361 | 4.89 | 0.05059 | 0.00120 | 0.16535 | 0.00395 | 0.02371 | 0.00032 | 0.00688 | 0.00045 | 0.29 | 222  | 56  | 155 | 3  | 151 | 2.0  | 139 | 9  | 1.0 |
|    | ZC-13-11 | 639  | 104 | 6.15 | 0.04908 | 0.00297 | 0.16027 | 0.00942 | 0.02369 | 0.00048 | 0.00746 | 0.00054 | 0.09 | 152  | 137 | 151 | 8  | 151 | 3.0  | 150 | 11 | 1.0 |
|    | ZC-13-12 | 781  | 216 | 3.62 | 0.05322 | 0.00178 | 0.17355 | 0.00570 | 0.02365 | 0.00036 | 0.00741 | 0.00054 | 0.19 | 338  | 78  | 162 | 5  | 151 | 2.0  | 149 | 11 | 0.9 |
|    | ZC-13-13 | 848  | 235 | 3.61 | 0.05373 | 0.00158 | 0.17545 | 0.00511 | 0.02369 | 0.00035 | 0.00736 | 0.00056 | 0.23 | 360  | 68  | 164 | 4  | 151 | 2.0  | 148 | 11 | 0.9 |
|    | ZC-13-14 | 1181 | 255 | 4.64 | 0.04781 | 0.00146 | 0.15619 | 0.00470 | 0.02370 | 0.00035 | 0.00709 | 0.00056 | 0.21 | 90   | 71  | 147 | 4  | 151 | 2.0  | 143 | 11 | 1.0 |
|    | ZC-13-15 | 573  | 172 | 3.32 | 0.05567 | 0.00207 | 0.17963 | 0.00652 | 0.02341 | 0.00038 | 0.00783 | 0.00066 | 0.17 | 439  | 85  | 168 | 6  | 149 | 2.0  | 158 | 13 | 0.9 |
|    | ZC-13-16 | 466  | 118 | 3.95 | 0.04994 | 0.00222 | 0.16303 | 0.00707 | 0.02368 | 0.00040 | 0.00675 | 0.00061 | 0.13 | 192  | 104 | 153 | 6  | 151 | 3.0  | 136 | 12 | 1.0 |
|    | ZC-13-17 | 1340 | 307 | 4.36 | 0.04788 | 0.00134 | 0.15578 | 0.00434 | 0.02360 | 0.00034 | 0.00725 | 0.00066 | 0.25 | 93   | 65  | 147 | 4  | 150 | 2.0  | 146 | 13 | 1.0 |
|    | ZC-13-18 | 217  | 195 | 1.11 | 0.04938 | 0.00202 | 0.16145 | 0.00644 | 0.02372 | 0.00039 | 0.00775 | 0.00081 | 0.14 | 166  | 96  | 152 | 6  | 151 | 2.0  | 156 | 16 | 1.0 |
|    | ZC-13-19 | 1295 | 303 | 4.27 | 0.04885 | 0.00130 | 0.15833 | 0.00420 | 0.02351 | 0.00033 | 0.00807 | 0.00081 | 0.26 | 141  | 64  | 149 | 4  | 150 | 2.0  | 162 | 16 | 1.0 |
| A9 | ZC-15-1  | 881  | 393 | 2.24 | 0.04836 | 0.00138 | 0.15021 | 0.00477 | 0.02253 | 0.00055 | 0.00403 | 0.00020 | 0.51 | 117  | 68  | 142 | 4  | 144 | 3.0  | 81  | 4  | 1.0 |
|    | ZC-15-2  | 1074 | 555 | 1.94 | 0.04571 | 0.00139 | 0.13225 | 0.00448 | 0.02099 | 0.00054 | 0.00403 | 0.00025 | 0.51 | -17  | 62  | 126 | 4  | 134 | 3.0  | 81  | 5  | 1.1 |
|    | ZC-15-3  | 1332 | 523 | 2.54 | 0.08320 | 0.00292 | 0.24644 | 0.00896 | 0.02149 | 0.00054 | 0.00731 | 0.00076 | 0.39 | 1274 | 70  | 224 | 7  | 137 | 3.0  | 147 | 15 | 0.6 |
|    | ZC-15-4  | 1422 | 478 | 2.98 | 0.05273 | 0.00222 | 0.14467 | 0.00612 | 0.01991 | 0.00048 | 0.00592 | 0.00064 | 0.29 | 317  | 98  | 137 | 5  | 127 | 3.0  | 119 | 13 | 0.9 |
|    | ZC-15-5  | 1615 | 687 | 2.35 | 0.04907 | 0.00127 | 0.14636 | 0.00419 | 0.02163 | 0.00048 | 0.00490 | 0.00034 | 0.51 | 151  | 62  | 139 | 4  | 138 | 3.0  | 99  | 7  | 1.0 |
|    | ZC-15-6  | 1016 | 427 | 2.38 | 0.04835 | 0.00183 | 0.13918 | 0.00555 | 0.02088 | 0.00053 | 0.00419 | 0.00037 | 0.40 | 116  | 87  | 132 | 5  | 133 | 3.0  | 85  | 7  |     |



|           |          |     |     |      |         |         |         |         |         |         |         |         |      |      |     |     |    |     |     |     |    |     |
|-----------|----------|-----|-----|------|---------|---------|---------|---------|---------|---------|---------|---------|------|------|-----|-----|----|-----|-----|-----|----|-----|
| ZC-13B-15 |          | 232 | 56  | 4.17 | 0.04192 | 0.01093 | 0.11645 | 0.03025 | 0.02015 | 0.00058 | 0.00396 | 0.00078 | 0.02 | -181 | 387 | 112 | 28 | 129 | 4.0 | 80  | 16 | 1.2 |
| A11       | ZC-20-1  | 418 | 155 | 2.70 | 0.04766 | 0.00203 | 0.13727 | 0.00589 | 0.02089 | 0.00032 | 0.00458 | 0.00026 | 0.20 | 82   | 95  | 131 | 5  | 133 | 2.0 | 92  | 5  | 1.0 |
|           | ZC-20-2  | 668 | 213 | 3.13 | 0.04770 | 0.00178 | 0.13557 | 0.00508 | 0.02061 | 0.00032 | 0.00343 | 0.00015 | 0.22 | 84   | 84  | 129 | 5  | 132 | 2.0 | 69  | 3  | 1.0 |
|           | ZC-20-3  | 611 | 255 | 2.39 | 0.04895 | 0.00143 | 0.13575 | 0.00406 | 0.02012 | 0.00029 | 0.00496 | 0.00031 | 0.29 | 145  | 70  | 129 | 4  | 128 | 2.0 | 100 | 6  | 1.0 |
|           | ZC-20-4  | 354 | 176 | 2.02 | 0.04896 | 0.00179 | 0.13757 | 0.00508 | 0.02039 | 0.00030 | 0.00511 | 0.00035 | 0.22 | 146  | 86  | 131 | 5  | 130 | 2.0 | 103 | 7  | 1.0 |
|           | ZC-20-5  | 502 | 233 | 2.16 | 0.04624 | 0.00135 | 0.12869 | 0.00386 | 0.02019 | 0.00029 | 0.00247 | 0.00009 | 0.29 | 10   | 60  | 123 | 3  | 129 | 2.0 | 50  | 2  | 1.0 |
|           | ZC-20-6  | 236 | 118 | 1.99 | 0.04886 | 0.00245 | 0.13477 | 0.00678 | 0.02001 | 0.00031 | 0.00517 | 0.00038 | 0.16 | 141  | 114 | 128 | 6  | 128 | 2.0 | 104 | 8  | 1.0 |
|           | ZC-20-7  | 185 | 133 | 1.39 | 0.04874 | 0.00252 | 0.13069 | 0.00676 | 0.01945 | 0.00031 | 0.00490 | 0.00037 | 0.16 | 135  | 118 | 125 | 6  | 124 | 2.0 | 99  | 7  | 1.0 |
|           | ZC-20-8  | 438 | 295 | 1.48 | 0.04827 | 0.00140 | 0.13182 | 0.00390 | 0.01981 | 0.00029 | 0.00493 | 0.00035 | 0.29 | 113  | 68  | 126 | 3  | 126 | 2.0 | 99  | 7  | 1.0 |
|           | ZC-20-9  | 506 | 238 | 2.13 | 0.04778 | 0.00159 | 0.13080 | 0.00441 | 0.01986 | 0.00029 | 0.00488 | 0.00035 | 0.25 | 88   | 75  | 125 | 4  | 127 | 2.0 | 98  | 7  | 1.0 |
|           | ZC-20-10 | 483 | 233 | 2.07 | 0.04914 | 0.00209 | 0.13162 | 0.00556 | 0.01943 | 0.00031 | 0.00497 | 0.00047 | 0.17 | 155  | 99  | 126 | 5  | 124 | 2.0 | 100 | 9  | 1.0 |
|           | ZC-20-11 | 360 | 155 | 2.33 | 0.04299 | 0.00191 | 0.12070 | 0.00540 | 0.02037 | 0.00031 | 0.00426 | 0.00029 | 0.19 | -124 | 99  | 116 | 5  | 130 | 2.0 | 86  | 6  | 1.1 |
|           | ZC-20-12 | 628 | 350 | 1.80 | 0.04918 | 0.00116 | 0.13354 | 0.00328 | 0.01970 | 0.00028 | 0.00490 | 0.00041 | 0.36 | 156  | 57  | 127 | 3  | 126 | 2.0 | 99  | 8  | 1.0 |
|           | ZC-20-13 | 500 | 200 | 2.50 | 0.04716 | 0.00228 | 0.12981 | 0.00626 | 0.01997 | 0.00034 | 0.00380 | 0.00031 | 0.17 | 57   | 106 | 124 | 6  | 127 | 2.0 | 77  | 6  | 1.0 |
|           | ZC-20-14 | 566 | 235 | 2.41 | 0.04803 | 0.00168 | 0.13081 | 0.00459 | 0.01976 | 0.00030 | 0.00487 | 0.00043 | 0.22 | 101  | 80  | 125 | 4  | 126 | 2.0 | 98  | 9  | 1.0 |
|           | ZC-20-15 | 563 | 257 | 2.19 | 0.04808 | 0.00149 | 0.13145 | 0.00415 | 0.01983 | 0.00029 | 0.00458 | 0.00038 | 0.27 | 103  | 72  | 125 | 4  | 127 | 2.0 | 92  | 8  | 1.0 |
| A12       | ZC-23-01 | 524 | 274 | 1.91 | 0.04765 | 0.00147 | 0.12688 | 0.00388 | 0.01931 | 0.00028 | 0.00563 | 0.00035 | 0.22 | 82   | 70  | 121 | 3  | 123 | 2.0 | 113 | 7  | 1.0 |
|           | ZC-23-02 | 455 | 260 | 1.75 | 0.04814 | 0.00193 | 0.12789 | 0.00502 | 0.01927 | 0.00032 | 0.00561 | 0.00038 | 0.16 | 106  | 91  | 122 | 5  | 123 | 2.0 | 113 | 8  | 1.0 |
|           | ZC-23-03 | 319 | 168 | 1.90 | 0.04707 | 0.00199 | 0.12566 | 0.00522 | 0.01936 | 0.00032 | 0.00569 | 0.00039 | 0.15 | 53   | 92  | 120 | 5  | 124 | 2.0 | 115 | 8  | 1.0 |
|           | ZC-23-04 | 331 | 165 | 2.00 | 0.04732 | 0.00196 | 0.12650 | 0.00515 | 0.01939 | 0.00032 | 0.00560 | 0.00039 | 0.16 | 65   | 92  | 121 | 5  | 124 | 2.0 | 113 | 8  | 1.0 |
|           | ZC-23-05 | 333 | 175 | 1.91 | 0.05034 | 0.00198 | 0.13405 | 0.00518 | 0.01932 | 0.00032 | 0.00570 | 0.00041 | 0.17 | 211  | 93  | 128 | 5  | 123 | 2.0 | 115 | 8  | 1.0 |
|           | ZC-23-06 | 385 | 221 | 1.74 | 0.05010 | 0.00210 | 0.13458 | 0.00550 | 0.01948 | 0.00033 | 0.00546 | 0.00041 | 0.14 | 200  | 99  | 128 | 5  | 124 | 2.0 | 110 | 8  | 1.0 |
|           | ZC-23-07 | 290 | 165 | 1.76 | 0.04901 | 0.00207 | 0.13172 | 0.00543 | 0.01949 | 0.00033 | 0.00546 | 0.00042 | 0.14 | 148  | 98  | 126 | 5  | 124 | 2.0 | 110 | 8  | 1.0 |
|           | ZC-23-08 | 475 | 253 | 1.88 | 0.04932 | 0.00167 | 0.13251 | 0.00443 | 0.01949 | 0.00030 | 0.00537 | 0.00041 | 0.20 | 163  | 81  | 126 | 4  | 124 | 2.0 | 108 | 8  | 1.0 |
|           | ZC-23-09 | 609 | 328 | 1.85 | 0.04840 | 0.00146 | 0.12964 | 0.00388 | 0.01943 | 0.00029 | 0.00506 | 0.00039 | 0.23 | 119  | 71  | 124 | 3  | 124 | 2.0 | 102 | 8  | 1.0 |
|           | ZC-23-10 | 517 | 282 | 1.83 | 0.04622 | 0.00156 | 0.12353 | 0.00413 | 0.01939 | 0.00030 | 0.00490 | 0.00040 | 0.21 | 9    | 70  | 118 | 4  | 124 | 2.0 | 99  | 8  | 1.1 |
|           | ZC-23-11 | 275 | 146 | 1.88 | 0.05038 | 0.00220 | 0.13464 | 0.00572 | 0.01938 | 0.00033 | 0.00575 | 0.00036 | 0.13 | 213  | 103 | 128 | 5  | 124 | 2.0 | 116 | 7  | 1.0 |
|           | ZC-23-12 | 434 | 227 | 1.91 | 0.05086 | 0.00161 | 0.13602 | 0.00424 | 0.01940 | 0.00029 | 0.00526 | 0.00030 | 0.21 | 234  | 75  | 129 | 4  | 124 | 2.0 | 106 | 6  | 1.0 |
|           | ZC-23-13 | 534 | 312 | 1.71 | 0.05050 | 0.00147 | 0.13461 | 0.00388 | 0.01933 | 0.00028 | 0.00534 | 0.00030 | 0.23 | 218  | 69  | 128 | 3  | 123 | 2.0 | 108 | 6  | 1.0 |
|           | ZC-23-14 | 299 | 114 | 2.62 | 0.04985 | 0.00436 | 0.13223 | 0.01126 | 0.01924 | 0.00039 | 0.00608 | 0.00022 | 0.38 | 188  | 199 | 126 | 10 | 123 | 2.0 | 122 | 4  | 1.0 |
|           | ZC-23-15 | 411 | 197 | 2.09 | 0.04818 | 0.00170 | 0.13158 | 0.00458 | 0.01981 | 0.00031 | 0.00559 | 0.00033 | 0.19 | 108  | 82  | 126 | 4  | 126 | 2.0 | 113 | 7  | 1.0 |
| A13       | ZC-43-01 | 197 | 68  | 2.90 | 0.08904 | 0.01343 | 0.22239 | 0.03266 | 0.01811 | 0.00063 | 0.00535 | 0.00021 | 0.37 | 1405 | 308 | 204 | 27 | 116 | 4.0 | 108 | 4  | 0.6 |
|           | ZC-43-02 | 192 | 72  | 2.69 | 0.12254 | 0.01757 | 0.28793 | 0.03915 | 0.01704 | 0.00077 | 0.00487 | 0.00024 | 0.28 | 1994 | 269 | 257 | 31 | 109 | 5.0 | 98  | 5  | 0.4 |
|           | ZC-43-03 | 254 | 94  | 2.71 | 0.06610 | 0.00390 | 0.17089 | 0.00966 | 0.01875 | 0.00042 | 0.00560 | 0.00041 | 0.09 | 810  | 127 | 160 | 8  | 120 | 3.0 | 113 | 8  | 0.8 |
|           | ZC-43-04 | 123 | 59  | 2.10 | 0.09042 | 0.01529 | 0.21868 | 0.03576 | 0.01754 | 0.00076 | 0.00518 | 0.00026 | 0.24 | 1434 | 348 | 201 | 30 | 112 | 5.0 | 104 | 5  | 0.6 |
|           | ZC-43-05 | 70  | 35  | 2.01 | 0.06620 | 0.00715 | 0.17345 | 0.01802 | 0.01900 | 0.00063 | 0.00534 | 0.00065 | 0.03 | 813  | 236 | 162 | 16 | 121 | 4.0 | 108 | 13 | 0.7 |
|           | ZC-43-06 | 371 | 109 | 3.42 | 0.13734 | 0.01835 | 0.30743 | 0.03950 | 0.01623 | 0.00059 | 0.00459 | 0.00019 | 0.47 | 2194 | 244 | 272 | 31 | 104 | 4.0 | 93  | 4  | 0.4 |
|           | ZC-43-07 | 392 | 209 | 1.87 | 0.06178 | 0.00214 | 0.16105 | 0.00544 | 0.01891 | 0.00031 | 0.00543 | 0.00038 | 0.19 | 667  | 76  | 152 | 5  | 121 | 2.0 | 109 | 8  | 0.8 |
|           | ZC-43-08 | 40  | 18  | 2.18 | 0.07624 | 0.01399 | 0.19701 | 0.03480 | 0.01874 | 0.00098 | 0.00617 | 0.00107 | 0.01 | 1101 | 401 | 183 | 30 | 120 | 6.0 | 124 | 21 | 0.7 |
|           | ZC-43-09 | 134 | 64  | 2.08 | 0.05276 | 0.00337 | 0.13769 | 0.00856 | 0.01893 | 0.00038 | 0.00536 | 0.00044 | 0.08 | 318  | 148 | 131 | 8  | 121 | 2.0 | 108 | 9  | 0.9 |
|           | ZC-43-10 | 340 | 144 | 2.37 | 0.04813 | 0.00196 | 0.12767 | 0.00509 | 0.01924 | 0.00031 | 0.00485 | 0.00036 | 0.15 | 106  | 92  | 122 | 5  | 123 | 2.0 | 98  | 7  | 1.0 |
|           | ZC-43-11 | 187 | 102 | 1.84 | 0.04951 | 0.00247 | 0.12789 | 0.00622 | 0.01874 | 0.00033 | 0.00449 | 0.00037 | 0.11 | 172  | 116 | 122 | 6  | 120 | 2.0 | 91  | 7  | 1.0 |
|           | ZC-43-12 | 78  | 34  | 2.32 | 0.05756 | 0.00513 | 0.14873 | 0.01293 | 0.01874 | 0.00046 | 0.00557 | 0.00054 | 0.05 | 513  | 203 | 141 | 11 | 120 | 3.0 | 112 | 11 | 0.9 |
|           | ZC-43-13 | 304 | 152 | 1.99 | 0.06122 | 0.00264 | 0.16303 | 0.00678 | 0.01931 | 0.00034 | 0.00590 | 0.00048 | 0.12 | 647  | 95  | 153 | 6  | 123 | 2.0 | 119 | 10 | 0.8 |
|           | ZC-43-14 | 71  | 36  | 1.96 | 0.06169 | 0.00501 | 0.16094 | 0.01268 | 0.01892 | 0.00046 | 0.00639 | 0.00065 | 0.05 | 663  | 180 | 152 | 11 | 121 | 3.0 | 129 | 13 | 0.8 |
|           | ZC-43-15 | 576 | 230 | 2.50 |         |         |         |         |         |         |         |         |      |      |     |     |    |     |     |     |    |     |

| ZC-29-15                                                   |               | 257    | 131   | 1.97 | 0.04866 | 0.00222 | 0.13833 | 0.00633 | 0.02062 | 0.00033 | 0.00364 | 0.00026 | 0.18 | 131  | 104 | 132 | 6  | 132 | 2.0 | 73  | 5   | 1.0 |
|------------------------------------------------------------|---------------|--------|-------|------|---------|---------|---------|---------|---------|---------|---------|---------|------|------|-----|-----|----|-----|-----|-----|-----|-----|
| L2, Zhongdai of Jinhua Municipality in Jinhua-Quzhou Basin |               |        |       |      |         |         |         |         |         |         |         |         |      |      |     |     |    |     |     |     |     |     |
| B1                                                         | 150117-01-01  | 292.4  | 207.0 | 1.41 | 0.04885 | 0.00362 | 0.13834 | 0.00984 | 0.02053 | 0.00053 | 0.00569 | 0.00049 | 0.06 | 141  | 167 | 132 | 9  | 131 | 3.0 | 115 | 10  | 1.0 |
|                                                            | 150117-01-02  | 390.1  | 204.3 | 1.91 | 0.15011 | 0.01173 | 0.43678 | 0.03259 | 0.02110 | 0.00049 | 0.00592 | 0.00017 | 0.54 | 2347 | 138 | 368 | 23 | 135 | 3.0 | 119 | 3   | 0.4 |
|                                                            | 150117-01-03  | 417.2  | 296.6 | 1.41 | 0.04898 | 0.00113 | 0.13665 | 0.00306 | 0.02023 | 0.00030 | 0.00605 | 0.00021 | 0.28 | 147  | 55  | 130 | 3  | 129 | 2.0 | 122 | 4   | 1.0 |
|                                                            | 150117-01-04  | 329.0  | 243.9 | 1.35 | 0.04958 | 0.00174 | 0.13942 | 0.00472 | 0.02039 | 0.00035 | 0.00603 | 0.00030 | 0.18 | 175  | 83  | 133 | 4  | 130 | 2.0 | 122 | 6   | 1.0 |
|                                                            | 150117-01-05  | 846.6  | 403.9 | 2.10 | 0.05079 | 0.00158 | 0.23173 | 0.00695 | 0.03308 | 0.00057 | 0.00863 | 0.00048 | 0.22 | 231  | 74  | 212 | 6  | 210 | 4.0 | 174 | 10  | 1.0 |
|                                                            | 150117-01-06  | 965.0  | 485.7 | 1.99 | 0.05032 | 0.00139 | 0.22839 | 0.00613 | 0.03291 | 0.00056 | 0.00801 | 0.00043 | 0.27 | 210  | 66  | 209 | 5  | 209 | 3.0 | 161 | 9   | 1.0 |
|                                                            | 150117-01-07  | 377.2  | 293.4 | 1.29 | 0.10907 | 0.00631 | 0.33484 | 0.01797 | 0.02227 | 0.00048 | 0.00644 | 0.00015 | 0.36 | 1784 | 108 | 293 | 14 | 142 | 3.0 | 130 | 3   | 0.5 |
|                                                            | 150117-01-08  | 491.7  | 352.9 | 1.39 | 0.04818 | 0.00170 | 0.14052 | 0.00477 | 0.02115 | 0.00038 | 0.00528 | 0.00030 | 0.19 | 108  | 82  | 134 | 4  | 135 | 2.0 | 106 | 6   | 1.0 |
|                                                            | 150117-01-09  | 630.3  | 382.3 | 1.65 | 0.04923 | 0.00103 | 0.15137 | 0.00309 | 0.02230 | 0.00034 | 0.00627 | 0.00025 | 0.34 | 159  | 50  | 143 | 3  | 142 | 2.0 | 126 | 5   | 1.0 |
|                                                            | 150117-01-10  | 442.1  | 277.9 | 1.59 | 0.05268 | 0.00361 | 0.14938 | 0.00976 | 0.02056 | 0.00053 | 0.00667 | 0.00085 | 0.07 | 315  | 159 | 141 | 9  | 131 | 3.0 | 134 | 17  | 0.9 |
|                                                            | 150117-01-11  | 558.5  | 327.9 | 1.70 | 0.04605 | 0.00243 | 0.11641 | 0.00584 | 0.01834 | 0.00030 | 0.00592 | 0.00025 | 0.49 |      | 114 | 112 | 5  | 117 | 2.0 | 119 | 5   | 1.0 |
|                                                            | 150117-01-12  | 970.6  | 436.0 | 2.23 | 0.04980 | 0.00104 | 0.21047 | 0.00430 | 0.03065 | 0.00045 | 0.00713 | 0.00028 | 0.33 | 186  | 50  | 194 | 4  | 195 | 3.0 | 144 | 6   | 1.0 |
|                                                            | 150117-01-13  | 385.5  | 287.9 | 1.34 | 0.04821 | 0.00145 | 0.13398 | 0.00389 | 0.02015 | 0.00032 | 0.00693 | 0.00031 | 0.21 | 110  | 70  | 128 | 3  | 129 | 2.0 | 140 | 6   | 1.0 |
|                                                            | 150117-01-14  | 451.5  | 293.3 | 1.54 | 0.04868 | 0.00452 | 0.13704 | 0.01217 | 0.02041 | 0.00064 | 0.00552 | 0.00068 | 0.04 | 132  | 210 | 130 | 11 | 130 | 4.0 | 111 | 14  | 1.0 |
|                                                            | 150117-01-15  | 785.3  | 437.9 | 1.79 | 0.06709 | 0.00192 | 0.21778 | 0.00598 | 0.02354 | 0.00041 | 0.00650 | 0.00036 | 0.25 | 841  | 61  | 200 | 5  | 150 | 3.0 | 131 | 7   | 0.8 |
|                                                            | 150117-01-16  | 210.3  | 188.1 | 1.12 | 0.04886 | 0.00227 | 0.14043 | 0.00627 | 0.02085 | 0.00040 | 0.00777 | 0.00052 | 0.12 | 141  | 106 | 133 | 6  | 133 | 3.0 | 156 | 10  | 1.0 |
|                                                            | 150117-01-17  | 1208.6 | 554.7 | 2.18 | 0.05008 | 0.00098 | 0.21334 | 0.00409 | 0.03090 | 0.00045 | 0.00974 | 0.00046 | 0.35 | 199  | 47  | 196 | 3  | 196 | 3.0 | 196 | 9   | 1.0 |
|                                                            | 150117-01-18  | 721.1  | 400.1 | 1.80 | 0.04961 | 0.00220 | 0.13817 | 0.00588 | 0.02021 | 0.00038 | 0.00697 | 0.00060 | 0.12 | 177  | 103 | 131 | 5  | 129 | 2.0 | 140 | 12  | 1.0 |
|                                                            | 150117-01-19  | 305.6  | 226.9 | 1.35 | 0.04923 | 0.00169 | 0.14079 | 0.00464 | 0.02074 | 0.00034 | 0.00637 | 0.00038 | 0.16 | 159  | 82  | 134 | 4  | 132 | 2.0 | 128 | 8   | 1.0 |
|                                                            | 150117-01-20  | 1005.3 | 404.9 | 2.48 | 0.05076 | 0.00231 | 0.21004 | 0.00914 | 0.03001 | 0.00059 | 0.00690 | 0.00075 | 0.12 | 230  | 107 | 194 | 8  | 191 | 4.0 | 139 | 15  | 1.0 |
| B2                                                         | 13102-01-01   | 421    | 276   | 1.52 | 0.04899 | 0.00122 | 0.13565 | 0.00328 | 0.02009 | 0.00030 | 0.00570 | 0.00019 | 0.26 | 147  | 30  | 129 | 3  | 128 | 2.0 | 115 | 4   | 1.0 |
|                                                            | 13102-01-02   | 3085   | 1106  | 2.79 | 0.04923 | 0.00136 | 0.14265 | 0.00380 | 0.02103 | 0.00034 | 0.00465 | 0.00024 | 0.24 | 159  | 33  | 135 | 3  | 134 | 2.0 | 94  | 5   | 1.0 |
|                                                            | 13102-01-03   | 707    | 389   | 1.82 | 0.06019 | 0.00236 | 0.21100 | 0.00789 | 0.02544 | 0.00047 | 0.00735 | 0.00054 | 0.15 | 610  | 49  | 194 | 7  | 162 | 3.0 | 148 | 11  | 0.8 |
|                                                            | 13102-01-04   | 478    | 311   | 1.54 | 0.04932 | 0.00286 | 0.13428 | 0.00744 | 0.01976 | 0.00044 | 0.00422 | 0.00033 | 0.08 | 163  | 87  | 128 | 7  | 126 | 3.0 | 85  | 7   | 1.0 |
|                                                            | 13102-01-05   | 417    | 178   | 2.35 | 0.10576 | 0.01089 | 0.31053 | 0.03104 | 0.02130 | 0.00052 | 0.00618 | 0.00015 | 0.53 | 1727 | 202 | 275 | 24 | 136 | 3.0 | 125 | 3   | 0.5 |
|                                                            | 13102-01-06   | 256    | 182   | 1.40 | 0.16000 | 0.01230 | 0.48478 | 0.03489 | 0.02198 | 0.00060 | 0.00612 | 0.00020 | 0.37 | 2456 | 135 | 401 | 24 | 140 | 4.0 | 123 | 4   | 0.3 |
|                                                            | 13102-01-07   | 317    | 239   | 1.33 | 0.04654 | 0.00727 | 0.13357 | 0.01999 | 0.02083 | 0.00097 | 0.00930 | 0.00213 | 0.01 | 26   | 223 | 127 | 18 | 133 | 6.0 | 187 | 43  | 1.0 |
|                                                            | 13102-01-08   | 260    | 198   | 1.32 | 0.09207 | 0.00537 | 0.26221 | 0.01458 | 0.02066 | 0.00037 | 0.00608 | 0.00012 | 0.42 | 1469 | 117 | 236 | 12 | 132 | 2.0 | 123 | 3   | 0.6 |
|                                                            | 13102-01-09   | 894    | 345   | 2.59 | 0.05467 | 0.00592 | 0.18264 | 0.01877 | 0.02425 | 0.00090 | 0.00827 | 0.00190 | 0.03 | 399  | 164 | 170 | 16 | 154 | 6.0 | 166 | 38  | 0.9 |
|                                                            | 13102-01-10   | 427    | 300   | 1.42 | 0.05400 | 0.00976 | 0.14354 | 0.02559 | 0.01928 | 0.00056 | 0.00603 | 0.00050 | 0.39 | 371  | 382 | 136 | 23 | 123 | 4.0 | 121 | 10  | 0.9 |
|                                                            | 13102-01-11   | 554    | 353   | 1.57 | 0.04888 | 0.00161 | 0.13491 | 0.00428 | 0.02002 | 0.00033 | 0.00567 | 0.00026 | 0.18 | 142  | 44  | 129 | 4  | 128 | 2.0 | 114 | 5   | 1.0 |
|                                                            | 13102-01-12   | 490    | 319   | 1.53 | 0.04887 | 0.00174 | 0.14080 | 0.00483 | 0.02090 | 0.00035 | 0.00616 | 0.00030 | 0.16 | 142  | 49  | 134 | 4  | 133 | 2.0 | 124 | 6   | 1.0 |
|                                                            | 13102-01-13   | 482    | 257   | 1.88 | 0.05690 | 0.00719 | 0.15802 | 0.01961 | 0.02014 | 0.00048 | 0.00626 | 0.00018 | 0.42 | 488  | 303 | 149 | 17 | 129 | 3.0 | 126 | 4   | 0.9 |
|                                                            | 13102-01-14   | 1395   | 1364  | 1.02 | 0.04843 | 0.00118 | 0.13795 | 0.00326 | 0.02066 | 0.00031 | 0.00644 | 0.00038 | 0.27 | 120  | 29  | 131 | 3  | 132 | 2.0 | 130 | 8   | 1.0 |
|                                                            | 13102-01-15   | 2547   | 1050  | 2.42 | 0.05939 | 0.00149 | 0.18638 | 0.00448 | 0.02275 | 0.00035 | 0.00761 | 0.00047 | 0.25 | 581  | 27  | 174 | 4  | 145 | 2.0 | 153 | 9   | 0.8 |
|                                                            | 13102-01-16   | 416    | 275   | 1.51 | 0.04966 | 0.00259 | 0.13223 | 0.00662 | 0.01931 | 0.00040 | 0.00590 | 0.00044 | 0.10 | 179  | 78  | 126 | 6  | 123 | 3.0 | 119 | 9   | 1.0 |
|                                                            | 13102-01-17   | 472    | 313   | 1.51 | 0.05760 | 0.00475 | 0.15982 | 0.01284 | 0.02012 | 0.00038 | 0.00624 | 0.00012 | 0.41 | 515  | 195 | 151 | 11 | 128 | 2.0 | 126 | 2   | 0.8 |
|                                                            | 13102-01-18   | 437    | 287   | 1.53 | 0.04865 | 0.00370 | 0.13183 | 0.00958 | 0.01964 | 0.00051 | 0.00588 | 0.00074 | 0.05 | 131  | 115 | 126 | 9  | 125 | 3.0 | 118 | 15  | 1.0 |
|                                                            | 13102-01-19   | 764    | 335   | 2.28 | 0.08349 | 0.00419 | 0.29013 | 0.01367 | 0.02522 | 0.00058 | 0.00843 | 0.00089 | 0.11 | 1281 | 56  | 259 | 11 | 161 | 4.0 | 170 | 18  | 0.6 |
|                                                            | 13102-01-20   | 1343   | 593   | 2.27 | 0.04920 | 0.00359 | 0.15556 | 0.01099 | 0.02294 | 0.00062 | 0.00658 | 0.00114 | 0.10 | 157  | 110 | 147 | 10 | 146 | 4.0 | 133 | 23  | 1.0 |
| B3                                                         | 13102-02zk-01 | 537.6  | 232.7 | 2.31 | 0.04920 | 0.00421 | 0.13754 | 0.01172 | 0.02027 | 0.00037 | 0.00645 | 0.00140 | 0.01 | 157  | 157 | 131 | 10 | 129 | 2.0 | 130 | 28  | 1.0 |
|                                                            | 13102-02zk-02 | 466.8  | 165.0 | 2.83 | 0.04826 | 0.00561 | 0.13210 | 0.01530 | 0.01985 | 0.00039 | 0.00689 | 0.00161 | 0.01 | 112  | 219 | 126 | 14 | 127 | 2.0 | 139 | 32  | 1.0 |
|                                                            | 13102-02zk-03 | 526.6  | 165.6 | 3.18 | 0.04904 | 0.00800 | 0.14083 | 0.02279 | 0.02084 | 0.00056 | 0.01211 | 0.00526 | 0.01 | 150  | 279 | 134 | 20 | 133 | 4.0 | 243 | 105 | 1.0 |
|                                                            | 13102-02zk-04 | 320.1  | 75.2  | 4.25 | 0.06268 | 0.01081 |         |         |         |         |         |         |      |      |     |     |    |     |     |     |     |     |

|               |         |       |       |         |         |         |         |         |         |         |         |      |     |     |     |    |     |     |     |    |     |
|---------------|---------|-------|-------|---------|---------|---------|---------|---------|---------|---------|---------|------|-----|-----|-----|----|-----|-----|-----|----|-----|
| 13102-04zk-09 | 3259.6  | ####  | 3.06  | 0.04896 | 0.00166 | 0.14250 | 0.00495 | 0.02111 | 0.00033 | 0.00560 | 0.00147 | 0.01 | 146 | 52  | 135 | 4  | 135 | 2.0 | 113 | 30 | 1.0 |
| 13102-04zk-10 | 1231.3  | 400.5 | 3.07  | 0.04838 | 0.00574 | 0.14732 | 0.01736 | 0.02211 | 0.00064 | 0.00413 | 0.00213 | 0.01 | 118 | 209 | 140 | 15 | 141 | 4.0 | 83  | 43 | 1.0 |
| 13102-04-11   | 69584.2 | ####  | 15.88 | 0.04828 | 0.00109 | 0.13123 | 0.00320 | 0.01971 | 0.00031 | 0.00485 | 0.00104 | 0.01 | 113 | 30  | 125 | 3  | 126 | 2.0 | 98  | 21 | 1.0 |
| 13102-04-12   | 45484.7 | ####  | 18.01 | 0.04914 | 0.00105 | 0.15232 | 0.00354 | 0.02248 | 0.00034 | 0.00466 | 0.00090 | 0.01 | 155 | 28  | 144 | 3  | 143 | 2.0 | 94  | 18 | 1.0 |
| 13102-04-13   | 44573.7 | ####  | 19.46 | 0.04949 | 0.00158 | 0.15779 | 0.00520 | 0.02313 | 0.00040 | 0.00362 | 0.00073 | 0.01 | 171 | 45  | 149 | 5  | 147 | 3.0 | 73  | 15 | 1.0 |
| 13102-04-14   | 60500.4 | ####  | 15.23 | 0.04877 | 0.00150 | 0.14054 | 0.00450 | 0.02091 | 0.00037 | 0.00339 | 0.00074 | 0.01 | 137 | 43  | 134 | 4  | 133 | 2.0 | 68  | 15 | 1.0 |
| 13102-04-15   | 51277.7 | ####  | 14.04 | 0.04853 | 0.00116 | 0.13939 | 0.00357 | 0.02083 | 0.00032 | 0.00518 | 0.00134 | 0.01 | 125 | 33  | 133 | 3  | 133 | 2.0 | 104 | 27 | 1.0 |
| 13102-04-16   | 98552.0 | ####  | 17.46 | 0.04893 | 0.00168 | 0.12934 | 0.00460 | 0.01917 | 0.00036 | 0.00180 | 0.00030 | 0.01 | 144 | 49  | 124 | 4  | 122 | 2.0 | 36  | 6  | 1.0 |
| 13102-04-17   | 11015.8 | ####  | 5.79  | 0.04824 | 0.00125 | 0.14609 | 0.00401 | 0.02196 | 0.00034 | 0.00640 | 0.00197 | 0.01 | 111 | 36  | 138 | 4  | 140 | 2.0 | 129 | 40 | 1.0 |
| 13102-04-18   | 94346.9 | ####  | 12.35 | 0.04816 | 0.00169 | 0.12326 | 0.00446 | 0.01856 | 0.00035 | 0.00164 | 0.00026 | 0.01 | 107 | 50  | 118 | 4  | 119 | 2.0 | 33  | 5  | 1.0 |
| 13102-04-19   | 423.6   | 161.6 | 2.62  | 0.04899 | 0.00561 | 0.15815 | 0.01804 | 0.02341 | 0.00049 | 0.00692 | 0.00226 | 0.01 | 147 | 217 | 149 | 16 | 149 | 3.0 | 139 | 45 | 1.0 |
| 13102-04-20   | 7433.4  | ####  | 4.36  | 0.04859 | 0.00137 | 0.15718 | 0.00466 | 0.02346 | 0.00038 | 0.00714 | 0.00257 | 0.01 | 128 | 40  | 148 | 4  | 149 | 2.0 | 144 | 52 | 1.0 |

L3, Guantou-Fenglin of Yongkang county in Yongkang Basin

|    |            |      |     |      |         |         |         |         |         |         |         |         |      |      |     |     |    |     |     |      |    |     |
|----|------------|------|-----|------|---------|---------|---------|---------|---------|---------|---------|---------|------|------|-----|-----|----|-----|-----|------|----|-----|
|    | 0126-01-1  | 382  | 128 | 2.99 | 0.04879 | 0.00344 | 0.12527 | 0.00854 | 0.01862 | 0.00044 | 0.00507 | 0.00049 | 0.07 | 138  | 160 | 120 | 8  | 119 | 3.0 | 102  | 10 | 1.0 |
|    | 0126-01-2  | 242  | 76  | 3.17 | 0.07498 | 0.00583 | 0.17838 | 0.01320 | 0.01725 | 0.00052 | 0.00274 | 0.00020 | 0.08 | 1068 | 161 | 167 | 11 | 110 | 3.0 | 55   | 4  | 0.7 |
|    | 0126-01-3  | 227  | 80  | 2.85 | 0.04846 | 0.00206 | 0.12494 | 0.00527 | 0.01870 | 0.00032 | 0.00367 | 0.00016 | 0.18 | 122  | 97  | 120 | 5  | 119 | 2.0 | 74   | 3  | 1.0 |
|    | 0126-01-4  | 299  | 105 | 2.86 | 0.04876 | 0.00235 | 0.12297 | 0.00580 | 0.01829 | 0.00033 | 0.00507 | 0.00032 | 0.13 | 136  | 110 | 118 | 5  | 117 | 2.0 | 102  | 6  | 1.0 |
|    | 0126-01-5  | 279  | 86  | 3.26 | 0.04912 | 0.00176 | 0.12786 | 0.00456 | 0.01888 | 0.00030 | 0.00421 | 0.00018 | 0.21 | 154  | 85  | 122 | 4  | 121 | 2.0 | 85   | 4  | 1.0 |
|    | 0126-01-6  | 67   | 25  | 2.71 | 0.04904 | 0.00460 | 0.12511 | 0.01159 | 0.01851 | 0.00041 | 0.00417 | 0.00027 | 0.07 | 150  | 213 | 120 | 10 | 118 | 3.0 | 84   | 5  | 1.0 |
|    | 0126-01-7  | 192  | 72  | 2.66 | 0.04830 | 0.00238 | 0.11858 | 0.00573 | 0.01781 | 0.00031 | 0.00588 | 0.00043 | 0.12 | 114  | 111 | 114 | 5  | 114 | 2.0 | 118  | 9  | 1.0 |
|    | 0126-01-8  | 260  | 49  | 5.31 | 0.09675 | 0.01299 | 0.22528 | 0.02952 | 0.01689 | 0.00049 | 0.00495 | 0.00013 | 0.59 | 1562 | 265 | 206 | 24 | 108 | 3.0 | 100  | 3  | 0.5 |
|    | 0126-01-9  | 119  | 39  | 3.07 | 0.05107 | 0.00521 | 0.12120 | 0.01202 | 0.01721 | 0.00048 | 0.00554 | 0.00065 | 0.04 | 244  | 233 | 116 | 11 | 110 | 3.0 | 112  | 13 | 0.9 |
|    | 0126-01-10 | 123  | 40  | 3.06 | 0.05708 | 0.00467 | 0.14117 | 0.01120 | 0.01794 | 0.00045 | 0.00620 | 0.00069 | 0.06 | 495  | 186 | 134 | 10 | 115 | 3.0 | 125  | 14 | 0.9 |
|    | 0126-01-11 | 96   | 21  | 4.58 | 0.09519 | 0.01496 | 0.22317 | 0.03320 | 0.01700 | 0.00092 | 0.00478 | 0.00047 | 0.02 | 1532 | 316 | 205 | 28 | 109 | 6.0 | 96   | 9  | 0.5 |
|    | 0126-01-12 | 246  | 45  | 5.49 | 0.04959 | 0.00371 | 0.12423 | 0.00906 | 0.01817 | 0.00040 | 0.00581 | 0.00041 | 0.06 | 176  | 170 | 119 | 8  | 116 | 3.0 | 117  | 8  | 1.0 |
|    | 0126-01-13 | 110  | 44  | 2.50 | 0.04878 | 0.00489 | 0.11873 | 0.01159 | 0.01765 | 0.00049 | 0.00625 | 0.00061 | 0.05 | 137  | 224 | 114 | 11 | 113 | 3.0 | 126  | 12 | 1.0 |
|    | 0126-01-14 | 403  | 72  | 5.62 | 0.04726 | 0.00364 | 0.12013 | 0.00898 | 0.01845 | 0.00043 | 0.00583 | 0.00056 | 0.06 | 62   | 172 | 115 | 8  | 118 | 3.0 | 117  | 11 | 1.0 |
|    | 0126-01-15 | 93   | 34  | 2.75 | 0.04774 | 0.00322 | 0.12188 | 0.00812 | 0.01852 | 0.00035 | 0.00429 | 0.00022 | 0.10 | 86   | 151 | 117 | 7  | 118 | 2.0 | 87   | 4  | 1.0 |
|    | 0126-01-16 | 171  | 63  | 2.69 | 0.05059 | 0.00293 | 0.12480 | 0.00705 | 0.01790 | 0.00035 | 0.00502 | 0.00038 | 0.10 | 222  | 134 | 119 | 6  | 114 | 2.0 | 101  | 8  | 1.0 |
|    | 0126-01-17 | 215  | 56  | 3.81 | 0.06211 | 0.00373 | 0.16173 | 0.00933 | 0.01890 | 0.00041 | 0.00573 | 0.00051 | 0.08 | 678  | 132 | 152 | 8  | 121 | 3.0 | 115  | 10 | 0.8 |
|    | 0126-01-18 | 347  | 119 | 2.91 | 0.04764 | 0.00186 | 0.11892 | 0.00455 | 0.01811 | 0.00029 | 0.00541 | 0.00039 | 0.16 | 81   | 87  | 114 | 4  | 116 | 2.0 | 109  | 8  | 1.0 |
|    | 0126-01-19 | 402  | 72  | 5.59 | 0.04789 | 0.00217 | 0.11934 | 0.00530 | 0.01808 | 0.00030 | 0.00484 | 0.00028 | 0.13 | 94   | 102 | 114 | 5  | 116 | 2.0 | 98   | 6  | 1.0 |
|    | 0126-01-20 | 172  | 59  | 2.89 | 0.04826 | 0.00239 | 0.12210 | 0.00594 | 0.01836 | 0.00031 | 0.00470 | 0.00030 | 0.12 | 112  | 112 | 117 | 5  | 117 | 2.0 | 95   | 6  | 1.0 |
| C2 | 0126-02-1  | 402  | 132 | 3.04 | 0.05036 | 0.00165 | 0.13208 | 0.00429 | 0.01902 | 0.00029 | 0.00421 | 0.00018 | 0.22 | 212  | 78  | 126 | 4  | 121 | 2.0 | 85   | 4  | 1.0 |
|    | 0126-02-2  | 483  | 157 | 3.07 | 0.05574 | 0.00381 | 0.14982 | 0.00984 | 0.01949 | 0.00048 | 0.00434 | 0.00044 | 0.08 | 442  | 157 | 142 | 9  | 124 | 3.0 | 88   | 9  | 0.9 |
|    | 0126-02-3  | 119  | 30  | 3.96 | 0.09609 | 0.00680 | 0.28595 | 0.01911 | 0.02159 | 0.00060 | 0.00709 | 0.00052 | 0.06 | 1550 | 137 | 255 | 15 | 138 | 4.0 | 143  | 10 | 0.5 |
|    | 0126-02-4  | 549  | 219 | 2.51 | 0.04772 | 0.00146 | 0.12626 | 0.00390 | 0.01919 | 0.00031 | 0.00273 | 0.00011 | 0.28 | 85   | 70  | 121 | 4  | 123 | 2.0 | 55   | 2  | 1.0 |
|    | 0126-02-5  | 731  | 290 | 2.52 | 0.04965 | 0.00231 | 0.13370 | 0.00603 | 0.01953 | 0.00037 | 0.00493 | 0.00049 | 0.13 | 179  | 108 | 127 | 5  | 125 | 2.0 | 99   | 10 | 1.0 |
|    | 0126-02-6  | 256  | 86  | 2.99 | 0.04841 | 0.00223 | 0.12990 | 0.00591 | 0.01947 | 0.00034 | 0.00344 | 0.00017 | 0.16 | 119  | 105 | 124 | 5  | 124 | 2.0 | 69   | 3  | 1.0 |
|    | 0126-02-7  | 285  | 67  | 4.25 | 0.05166 | 0.00305 | 0.13884 | 0.00800 | 0.01949 | 0.00039 | 0.00392 | 0.00023 | 0.10 | 270  | 137 | 132 | 7  | 124 | 2.0 | 79   | 5  | 0.9 |
|    | 0126-02-8  | 1152 | 293 | 3.93 | 0.04810 | 0.00128 | 0.12842 | 0.00348 | 0.01937 | 0.00030 | 0.00312 | 0.00015 | 0.32 | 104  | 63  | 123 | 3  | 124 | 2.0 | 63   | 3  | 1.0 |
|    | 0126-02-9  | 1449 | 439 | 3.30 | 0.05244 | 0.00248 | 0.13960 | 0.00637 | 0.01931 | 0.00042 | 0.00082 | 0.00005 | 0.16 | 305  | 111 | 133 | 6  | 123 | 3.0 | 17   | 1  | 0.9 |
|    | 0126-02-10 | 757  | 168 | 4.50 | 0.05298 | 0.00284 | 0.14175 | 0.00737 | 0.01942 | 0.00042 | 0.00253 | 0.00020 | 0.13 | 328  | 125 | 135 | 7  | 124 | 3.0 | 51   | 4  | 0.9 |
|    | 0126-02-11 | 1327 | 480 | 2.77 | 0.04335 | 0.00193 | 0.11404 | 0.00496 | 0.01909 | 0.00039 | 0.00083 | 0.00004 | 0.18 | -105 | 98  | 110 | 5  | 122 | 2.0 | 16.8 | 1  | 1.1 |
|    | 0126-02-12 | 114  | 20  | 5.60 | 0.04908 | 0.01225 | 0.12957 | 0.03161 | 0.01915 | 0.00107 | 0.00316 | 0.00036 | 0.01 | 152  | 437 | 124 | 28 | 122 | 7.0 | 64   | 7  | 1.0 |
|    | 0126-02-13 | 943  | 397 | 2.37 | 0.04887 | 0.00252 | 0.12720 | 0.00637 | 0.01890 | 0.00040 | 0.00235 | 0.00019 | 0.14 | 142  | 117 | 122 | 6  | 121 | 3.0 | 47   | 4  | 1.0 |
|    | 0126-02-14 | 892  | 157 | 5.67 | 0.04900 | 0.00227 | 0.13018 | 0.00591 | 0.01927 | 0.00037 | 0.00291 | 0.00015 | 0.16 | 148  | 106 | 124 | 5  | 123 | 2.0 | 59   | 3  | 1.0 |
|    | 0126-02-15 | 356  | 98  | 3.62 | 0.04860 | 0.00194 | 0.12795 | 0.00504 | 0.01910 | 0.00031 | 0.00409 | 0.00019 | 0.17 | 129  | 93  | 122 | 5  | 122 | 2.0 | 82   | 4  | 1.0 |
| C3 | 1102-01-1  | 509  | 187 | 2.72 | 0.11410 | 0.00594 | 0.30075 | 0.01524 | 0.01912 | 0.00038 | 0.00619 | 0.00084 | 0.13 | 1866 | 96  | 267 | 12 | 122 | 2.0 | 125  | 17 | 0.5 |
|    | 1102-01-2  | 301  | 105 | 2.85 | 0.05241 | 0.00942 | 0.13376 | 0.02390 | 0.01852 | 0.00048 | 0.00863 | 0.00364 | 0.03 | 303  | 367 | 127 | 21 | 118 | 3.0 | 174  | 73 | 0.9 |
|    | 1102-01-3  | 492  | 182 | 2.71 | 0.05050 | 0.00588 | 0.13571 | 0.01566 | 0.01950 | 0.00043 | 0.00989 | 0.00421 | 0.05 | 218  | 262 | 129 | 14 | 124 | 3.0 | 199  | 84 | 1.0 |
|    | 1102-01-4  | 311  | 110 | 2.82 | 0.04749 | 0.00948 | 0.11482 | 0.02279 | 0.01754 | 0.00045 | 0.00387 | 0.00064 | 0.02 | 74   | 351 | 110 | 21 | 112 | 3.0 | 78   | 13 | 1.0 |
|    | 1102-01-5  | 258  | 87  | 2.98 | 0.04950 | 0.01181 | 0.11826 | 0.02806 | 0.01733 | 0.00050 | 0.00552 | 0.00150 | 0.02 | 172  | 420 | 113 | 25 | 111 | 3.0 | 111  | 30 | 1.0 |
|    | 1102-01-6  | 1157 | 327 | 3.53 | 0.04714 | 0.00401 | 0.12222 | 0.01026 | 0.01883 | 0.00039 | 0.00224 | 0.00024 | 0.07 | 56   | 191 | 117 | 9  | 120 | 2.0 | 45   | 5  | 1.0 |
|    | 1102-01-7  | 824  | 328 | 2.51 | 0.05822 | 0.00447 | 0.13778 | 0.01044 | 0.01717 | 0.00035 | 0.00421 | 0.00084 | 0.08 | 538  | 174 | 131 | 9  | 110 | 2.0 | 85   | 17 | 0.8 |
|    | 1102-01-8  | 969  | 234 | 4.14 | 0.04759 | 0.00547 | 0.12888 | 0.01465 | 0.01964 | 0.00046 | 0.00805 | 0.00347 | 0.05 | 79   | 237 | 123 | 13 | 125 | 3.0 | 162  | 70 | 1.0 |
|    | 1102-01-9  | 165  | 66  | 2.51 | 0.11623 | 0.01452 | 0.31348 | 0.03807 | 0.01957 | 0.00066 | 0.00423 | 0.00082 | 0.03 | 1899 | 235 | 277 | 29 | 125 | 4.0 | 85   | 17 | 0.5 |
|    | 1102-01-10 | 809  | 169 | 4.80 | 0.04926 | 0.00645 | 0.12448 | 0.01620 | 0.01833 | 0.00041 | 0.00442 | 0.00098 | 0.05 | 160  | 272 | 119 | 15 | 117 | 3.0 | 89   | 20 | 1.0 |
|    | 1102-01-11 | 276  | 92  | 3.00 | 0.05000 | 0.01142 | 0.12289 | 0.02792 | 0.01783 | 0.00052 | 0.00706 | 0.00210 | 0.02 | 195  | 411 | 118 | 25 | 114 | 3.0 | 142  | 42 | 1.0 |
|    | 1102-01-12 | 497  | 181 | 2.75 | 0.05060 | 0.00599 | 0.12908 | 0.01517 | 0.01851 | 0.00040 | 0.00549 | 0.00136 | 0.05 | 223  | 267 | 123 | 14 | 118 | 3.0 | 111  | 27 | 1.0 |
|    | 1102-01-13 | 717  | 205 | 3.50 | 0.05605 | 0.00676 | 0.13471 | 0.01609 | 0.01743 | 0.00040 | 0.00520 | 0.00179 | 0.05 | 454  | 275 | 128 | 14 | 111 | 3.0 | 105  | 36 | 0.9 |
|    | 1102-01-14 | 398  | 139 | 2.87 | 0.05220 | 0.00847 | 0.12826 | 0.02065 | 0.01782 | 0.00046 | 0.00600 | 0.00249 | 0.03 | 294  | 335 | 123 | 19 | 114 | 3.0 | 121  | 50 | 0.9 |
|    | 1102-01-15 | 252  | 86  | 2.93 | 0.05015 | 0.01284 | 0.12110 | 0.03083 | 0.01752 | 0.00055 | 0.00677 | 0.00234 | 0.02 | 202  | 453 | 116 | 28 | 112 | 3.0 | 136  | 47 | 1.0 |
| C4 | 0127-01-1  | 202  | 70  | 2.90 | 0.04841 | 0.00628 | 0.11973 | 0.01502 | 0.01795 | 0.00067 | 0.00299 | 0.00035 | 0.03 | 119  | 264 | 115 | 14 | 115 | 4.0 | 60   | 7  | 1.0 |
|    | 0127-01-2  | 195  | 65  | 3.02 | 0.04836 | 0.00495 | 0.12187 | 0.01210 | 0.01828 | 0.00054 | 0.00486 | 0.00050 | 0.04 | 117  | 228 | 117 | 11 | 117 | 3.0 | 98   | 10 | 1.0 |
|    | 0127-01-3  | 2454 | 354 | 6.92 | 0.04999 | 0.00264 | 0.12452 | 0.00639 | 0.01807 | 0.00040 | 0.00233 | 0.00012 | 0.15 | 195  | 122 | 119 | 6  | 115 | 3.0 | 47   | 2  | 1.0 |
|    | 0127-01-4  | 652  | 96  | 6.79 | 0.05105 | 0.00515 | 0.12895 | 0.01253 | 0.01833 | 0.00060 | 0.00192 | 0.00014 | 0.05 | 243  | 230 | 123 | 11 | 117 | 4.0 | 39   | 3  | 1.0 |
|    | 0127-01-5  | 104  | 18  | 5.77 | 0.04767 | 0.01233 | 0.12125 | 0.03060 | 0.01844 | 0.00110 | 0.00579 | 0.00082 | 0.01 | 83   | 434 | 116 | 28 | 118 | 7.0 | 117  | 16 | 1.0 |
|    | 0127-01-6  | 565  | 134 | 4.22 | 0.04908 | 0.00200 | 0.12750 | 0.00515 | 0.01885 | 0.00032 | 0.00387 | 0.00021 | 0.19 | 152  | 95  | 122 | 5  | 120 | 2.0 | 78   | 4  | 1.0 |
|    | 0127-01-7  | 1141 | 150 | 7.61 | 0.0484  |         |         |         |         |         |         |         |      |      |     |     |    |     |     |      |    |     |

|    |              |        |       |      |         |         |         |         |         |         |         |         |      |      |      |     |     |     |      |     |     |     |
|----|--------------|--------|-------|------|---------|---------|---------|---------|---------|---------|---------|---------|------|------|------|-----|-----|-----|------|-----|-----|-----|
|    | 0127-01-19   | 268    | 53    | 5.01 | 0.04847 | 0.00186 | 0.11505 | 0.01457 | 0.01721 | 0.00063 | 0.00347 | 0.00040 | 1.72 | 122  | 89   | 111 | 13  | 110 | 4.0  | 70  | 8   | 1.0 |
|    | 0127-01-20   | 1135   | 243   | 4.67 | 0.04851 | 0.00634 | 0.11536 | 0.00318 | 0.01725 | 0.00027 | 0.00204 | 0.00008 | #### | 124  | 266  | 111 | 3   | 110 | 2.0  | 41  | 2   | 1.0 |
| C5 | 0127-10-1    | 522    | 160   | 3.27 | 0.04829 | 0.00272 | 0.11477 | 0.00627 | 0.01724 | 0.00035 | 0.00423 | 0.00043 | 0.10 | 114  | 127  | 110 | 6   | 110 | 2.0  | 85  | 9   | 1.0 |
|    | 0127-10-2    | 243    | 88    | 2.75 | 0.05064 | 0.00564 | 0.12639 | 0.01356 | 0.01811 | 0.00063 | 0.00253 | 0.00030 | 0.04 | 224  | 251  | 121 | 12  | 116 | 4.0  | 51  | 6   | 1.0 |
|    | 0127-10-3    | 245    | 59    | 4.14 | 0.04834 | 0.00319 | 0.12046 | 0.00774 | 0.01807 | 0.00037 | 0.00499 | 0.00041 | 0.07 | 116  | 148  | 115 | 7   | 115 | 2.0  | 101 | 8   | 1.0 |
|    | 0127-10-4    | 695    | 199   | 3.50 | 0.04769 | 0.00175 | 0.11603 | 0.00424 | 0.01765 | 0.00031 | 0.00192 | 0.00009 | 0.23 | 84   | 83   | 111 | 4   | 113 | 2.0  | 39  | 2   | 1.0 |
|    | 0127-10-5    | 474    | 162   | 2.92 | 0.04907 | 0.00199 | 0.11801 | 0.00473 | 0.01744 | 0.00031 | 0.00278 | 0.00016 | 0.19 | 151  | 94   | 113 | 4   | 111 | 2.0  | 56  | 3   | 1.0 |
|    | 0127-10-6    | 824    | 162   | 5.08 | 0.04820 | 0.00227 | 0.11820 | 0.00546 | 0.01779 | 0.00033 | 0.00293 | 0.00014 | 0.15 | 109  | 106  | 113 | 5   | 114 | 2.0  | 59  | 3   | 1.0 |
|    | 0127-10-7    | 296    | 140   | 2.11 | 0.04812 | 0.00189 | 0.11829 | 0.00458 | 0.01783 | 0.00030 | 0.00349 | 0.00017 | 0.18 | 105  | 89   | 114 | 4   | 114 | 2.0  | 70  | 3   | 1.0 |
|    | 0127-10-8    | 730    | 169   | 4.33 | 0.04850 | 0.00217 | 0.11555 | 0.00507 | 0.01731 | 0.00033 | 0.00154 | 0.00006 | 0.17 | 124  | 102  | 111 | 5   | 111 | 2.0  | 31  | 1   | 1.0 |
|    | 0127-10-9    | 437    | 71    | 6.18 | 0.04844 | 0.00243 | 0.12056 | 0.00595 | 0.01806 | 0.00033 | 0.00276 | 0.00010 | 0.14 | 121  | 114  | 116 | 5   | 115 | 2.0  | 56  | 2   | 1.0 |
|    | 0127-10-10   | 217    | 74    | 2.95 | 0.04837 | 0.00339 | 0.11907 | 0.00813 | 0.01785 | 0.00039 | 0.00459 | 0.00037 | 0.08 | 117  | 158  | 114 | 7   | 114 | 2.0  | 93  | 7   | 1.0 |
|    | 0127-10-11   | 1340   | 343   | 3.91 | 0.04840 | 0.00177 | 0.11843 | 0.00429 | 0.01779 | 0.00032 | 0.00214 | 0.00010 | 0.23 | 119  | 85   | 114 | 4   | 114 | 2.0  | 43  | 2   | 1.0 |
|    | 0127-10-12   | 386    | 116   | 3.32 | 0.04897 | 0.00290 | 0.11559 | 0.00665 | 0.01712 | 0.00035 | 0.00456 | 0.00044 | 0.09 | 146  | 134  | 111 | 6   | 109 | 2.0  | 92  | 9   | 1.0 |
|    | 0127-10-13   | 311    | 167   | 1.86 | 0.04841 | 0.00216 | 0.12215 | 0.00535 | 0.01830 | 0.00033 | 0.00466 | 0.00038 | 0.16 | 119  | 101  | 117 | 5   | 117 | 2.0  | 94  | 8   | 1.0 |
|    | 0127-10-14   | 535    | 174   | 3.07 | 0.04891 | 0.00159 | 0.11900 | 0.00379 | 0.01765 | 0.00026 | 0.00479 | 0.00037 | 0.19 | 144  | 77   | 114 | 3   | 113 | 2.0  | 97  | 7   | 1.0 |
|    | 0127-10-15   | 366    | 86    | 4.27 | 0.04816 | 0.00353 | 0.11477 | 0.00817 | 0.01729 | 0.00040 | 0.00444 | 0.00048 | 0.07 | 107  | 165  | 110 | 7   | 111 | 3.0  | 90  | 10  | 1.0 |
| C6 | 1102-02-1    | 279    | 97    | 2.89 | 0.04771 | 0.00304 | 0.12745 | 0.00786 | 0.01938 | 0.00031 | 0.00615 | 0.00015 | 0.51 | 85   | 142  | 122 | 7   | 124 | 2.0  | 124 | 3   | 1.0 |
|    | 1102-02-2    | 682    | 178   | 3.83 | 0.05127 | 0.00088 | 0.13485 | 0.00250 | 0.01908 | 0.00025 | 0.00513 | 0.00013 | 0.45 | 253  | 40   | 128 | 2   | 122 | 2.0  | 103 | 3   | 1.0 |
|    | 1102-02-3    | 764    | 189   | 4.05 | 0.05411 | 0.00168 | 0.14792 | 0.00455 | 0.01983 | 0.00030 | 0.00644 | 0.00035 | 0.23 | 376  | 72   | 140 | 4   | 127 | 2.0  | 130 | 7   | 0.9 |
|    | 1102-02-4    | 680    | 165   | 4.13 | 0.04841 | 0.00088 | 0.12785 | 0.00248 | 0.01915 | 0.00026 | 0.00479 | 0.00012 | 0.44 | 119  | 44   | 122 | 2   | 122 | 2.0  | 97  | 2   | 1.0 |
|    | 1102-02-5    | 704    | 226   | 3.12 | 0.05431 | 0.00131 | 0.14588 | 0.00366 | 0.01948 | 0.00029 | 0.00468 | 0.00020 | 0.36 | 384  | 55   | 138 | 3   | 124 | 2.0  | 94  | 4   | 0.9 |
|    | 1102-02-6    | 170    | 65    | 2.63 | 0.12382 | 0.00483 | 0.34521 | 0.01292 | 0.02022 | 0.00043 | 0.00511 | 0.00025 | 0.21 | 2012 | 71   | 301 | 10  | 129 | 3.0  | 103 | 5   | 0.4 |
|    | 1102-02-7    | 848    | 187   | 4.53 | 0.05012 | 0.00085 | 0.13104 | 0.00237 | 0.01896 | 0.00025 | 0.00522 | 0.00015 | 0.45 | 201  | 40   | 125 | 2   | 121 | 2.0  | 105 | 3   | 1.0 |
|    | 1102-02-8    | 396    | 137   | 2.89 | 0.04799 | 0.00101 | 0.13228 | 0.00293 | 0.02000 | 0.00028 | 0.00469 | 0.00014 | 0.39 | 99   | 51   | 126 | 3   | 128 | 2.0  | 95  | 3   | 1.0 |
|    | 1102-02-9    | 207    | 75    | 2.78 | 0.04841 | 0.00143 | 0.12986 | 0.00390 | 0.01946 | 0.00028 | 0.00472 | 0.00015 | 0.27 | 119  | 70   | 124 | 4   | 124 | 2.0  | 95  | 3   | 1.0 |
|    | 1102-02-10   | 639    | 79    | 8.06 | 0.04942 | 0.00131 | 0.13378 | 0.00361 | 0.01964 | 0.00027 | 0.00555 | 0.00017 | 0.29 | 168  | 63   | 127 | 3   | 125 | 2.0  | 112 | 3   | 1.0 |
|    | 1102-02-11   | 209    | 70    | 3.00 | 0.05449 | 0.00346 | 0.14317 | 0.00890 | 0.01906 | 0.00042 | 0.00297 | 0.00024 | 0.12 | 391  | 147  | 136 | 8   | 122 | 3.0  | 60  | 5   | 0.9 |
|    | 1102-02-12   | 500    | 148   | 3.38 | 0.04834 | 0.00100 | 0.12912 | 0.00281 | 0.01937 | 0.00027 | 0.00471 | 0.00016 | 0.40 | 116  | 50   | 123 | 3   | 124 | 2.0  | 95  | 3   | 1.0 |
|    | 1102-02-13   | 371    | 106   | 3.51 | 0.04931 | 0.00111 | 0.13246 | 0.00308 | 0.01949 | 0.00026 | 0.00484 | 0.00016 | 0.34 | 163  | 54   | 126 | 3   | 124 | 2.0  | 98  | 3   | 1.0 |
|    | 1102-02-14   | 952    | 214   | 4.45 | 0.05165 | 0.00140 | 0.14097 | 0.00392 | 0.01980 | 0.00031 | 0.00359 | 0.00020 | 0.33 | 270  | 64   | 134 | 3   | 126 | 2.0  | 72  | 4   | 0.9 |
|    | 1102-02-15   | 412    | 127   | 3.24 | 0.04926 | 0.00122 | 0.13504 | 0.00345 | 0.01989 | 0.00029 | 0.00468 | 0.00019 | 0.34 | 160  | 59   | 129 | 3   | 127 | 2.0  | 94  | 4   | 1.0 |
| C7 | 1309-11zk-01 | 178.6  | 18.8  | 9.50 | 0.04906 | 0.04478 | 0.13825 | 0.12579 | 0.02044 | 0.00151 | 0.00744 | 0.00199 | 0.01 | 151  | 1148 | 131 | 112 | 130 | 10.0 | 150 | 40  | 1.0 |
|    | 1309-11zk-03 | 1015.3 | 158.3 | 6.42 | 0.04876 | 0.00924 | 0.14368 | 0.02703 | 0.02137 | 0.00066 | 0.00394 | 0.00095 | 0.01 | 136  | 304  | 136 | 24  | 136 | 4.0  | 79  | 19  | 1.0 |
|    | 1309-11zk-02 | 474.8  | 83.3  | 5.70 | 0.04835 | 0.01271 | 0.13695 | 0.03583 | 0.02054 | 0.00066 | 0.00442 | 0.00093 | 0.01 | 116  | 404  | 130 | 32  | 131 | 4.0  | 89  | 19  | 1.0 |
|    | 1309-11zk-04 | 383.1  | 70.6  | 5.43 | 0.04904 | 0.01144 | 0.14596 | 0.03393 | 0.02159 | 0.00058 | 0.01005 | 0.00311 | 0.01 | 150  | 374  | 138 | 30  | 138 | 4.0  | 202 | 62  | 1.0 |
|    | 1309-11zk-05 | 555.8  | 102.4 | 5.43 | 0.04838 | 0.01184 | 0.13070 | 0.03665 | 0.02259 | 0.00077 | 0.00255 | 0.00052 | 0.01 | 118  | 377  | 143 | 32  | 144 | 5.0  | 51  | 10  | 1.0 |
|    | 1309-11zk-06 | 330.2  | 72.1  | 4.58 | 0.06116 | 0.01813 | 0.17386 | 0.05110 | 0.02061 | 0.00090 | 0.00430 | 0.00109 | 0.01 | 645  | 513  | 163 | 44  | 132 | 6.0  | 87  | 22  | 0.8 |
|    | 1309-11zk-07 | 467.0  | 87.1  | 5.36 | 0.04559 | 0.01646 | 0.13524 | 0.04856 | 0.02150 | 0.00094 | 0.00244 | 0.00060 | 0.01 | -24  | 513  | 129 | 43  | 137 | 6.0  | 49  | 12  | 1.1 |
|    | 1309-11zk-08 | 642.8  | 98.3  | 6.54 | 0.05990 | 0.01048 | 0.17944 | 0.03110 | 0.02173 | 0.00063 | 0.01414 | 0.01005 | 0.01 | 600  | 336  | 168 | 27  | 139 | 4.0  | 284 | 200 | 0.8 |
|    | 1309-11zk-09 | 1365.1 | 333.1 | 4.10 | 0.04811 | 0.00454 | 0.14186 | 0.01327 | 0.02138 | 0.00052 | 0.00247 | 0.00049 | 0.01 | 105  | 163  | 135 | 12  | 136 | 3.0  | 50  | 10  | 1.0 |
|    | 1309-11zk-10 | 123.8  | 29.2  | 4.24 | 0.04939 | 0.03723 | 0.13922 | 0.10454 | 0.02045 | 0.00138 | 0.02110 | 0.02321 | 0.01 | 166  | 1062 | 132 | 93  | 130 | 9.0  | 422 | 459 | 1.0 |
|    | 1309-11zk-11 | 340.9  | 64.0  | 5.32 | 0.04896 | 0.01532 | 0.12650 | 0.03943 | 0.01874 | 0.00062 | 0.01580 | 0.01182 | 0.01 | 146  | 481  | 121 | 36  | 120 | 4.0  | 317 | 235 | 1.0 |
|    | 1309-11zk-12 | 1019.2 | 165.3 | 6.17 | 0.05146 | 0.01475 | 0.15689 | 0.04443 | 0.02214 | 0.00110 | 0.00324 | 0.00117 | 0.01 | 261  | 437  | 148 | 39  | 141 | 7.0  | 65  | 24  | 1.0 |
|    | 1309-11zk-13 | 544.8  | 193.6 | 2.81 | 0.05408 | 0.00688 | 0.15685 | 0.01970 | 0.02103 | 0.00060 | 0.00167 | 0.00023 | 0.01 | 374  | 230  | 148 | 17  | 134 | 4.0  | 34  | 5   | 0.9 |
|    | 1309-11zk-14 | 84.4   | 18.6  | 4.53 | 0.04791 | 0.04429 | 0.12033 | 0.11091 | 0.01822 | 0.00133 | 0.00777 | 0.00189 | 0.01 | 95   | 1137 | 115 | 101 | 116 | 8.0  | 156 | 38  | 1.0 |
|    | 1309-11zk-15 | 408.4  | 95.8  | 4.26 | 0.04796 | 0.01119 | 0.13874 | 0.03217 | 0.02099 | 0.00067 | 0.00328 | 0.00064 | 0.01 | 97   | 361  | 132 | 29  | 134 | 4.0  | 66  | 13  | 1.0 |
|    | 1309-11zk-16 | 439.6  | 75.7  | 5.80 | 0.04616 | 0.01402 | 0.13175 | 0.03981 | 0.02071 | 0.00072 | 0.01022 | 0.00502 | 0.01 | 6    | 444  | 126 | 36  | 132 | 5.0  | 206 | 100 | 1.0 |
|    | 1309-11zk-17 | 179.4  | 50.0  | 3.59 | 0.04828 | 0.01656 | 0.13902 | 0.04751 | 0.02088 | 0.00072 | 0.00571 | 0.00149 | 0.01 | 113  | 522  | 132 | 42  | 133 | 5.0  | 115 | 30  | 1.0 |
|    | 1309-11zk-18 | 255.5  | 57.3  | 4.46 | 0.04983 | 0.01389 | 0.14586 | 0.04049 | 0.02123 | 0.00064 | 0.00934 | 0.00355 | 0.01 | 187  | 442  | 138 | 36  | 135 | 4.0  | 188 | 71  | 1.0 |
|    | 1309-11zk-19 | 331.3  | 67.7  | 4.89 | 0.04820 | 0.01852 | 0.13459 | 0.05144 | 0.02025 | 0.00089 | 0.00513 | 0.00186 | 0.01 | 109  | 574  | 128 | 46  | 129 | 6.0  | 103 | 37  | 1.0 |
|    | 1309-11zk-20 | 304.0  | 68.1  | 4.46 | 0.04802 | 0.01514 | 0.13253 | 0.04158 | 0.02002 | 0.00072 | 0.00566 | 0.00188 | 0.01 | 100  | 470  | 126 | 37  | 128 | 5.0  | 114 | 38  | 1.0 |

L4, Laozhu of Lishui Municipality in Yongkang Basin

|    |            |     |     |      |         |         |         |         |         |         |         |         |      |      |     |     |     |     |      |     |    |     |
|----|------------|-----|-----|------|---------|---------|---------|---------|---------|---------|---------|---------|------|------|-----|-----|-----|-----|------|-----|----|-----|
| D1 | 1103-01-1  | 286 | 85  | 3.36 | 0.05972 | 0.00833 | 0.16784 | 0.02320 | 0.02038 | 0.00050 | 0.00507 | 0.00113 | 0.04 | 593  | 316 | 158 | 20  | 130 | 3.0  | 102 | 23 | 0.8 |
|    | 1103-01-2  | 320 | 103 | 3.11 | 0.04704 | 0.00721 | 0.12858 | 0.01959 | 0.01982 | 0.00045 | 0.00389 | 0.00057 | 0.03 | 51   | 282 | 123 | 18  | 127 | 3.0  | 78  | 11 | 1.0 |
|    | 1103-01-3  | 509 | 129 | 3.94 | 0.04754 | 0.00602 | 0.13038 | 0.01641 | 0.01989 | 0.00042 | 0.00446 | 0.00069 | 0.05 | 76   | 252 | 124 | 15  | 127 | 3.0  | 90  | 14 | 1.0 |
|    | 1103-01-4  | 372 | 90  | 4.12 | 0.04892 | 0.00922 | 0.12975 | 0.02428 | 0.01923 | 0.00052 | 0.00597 | 0.00151 | 0.02 | 144  | 347 | 124 | 22  | 123 | 3.0  | 120 | 30 | 1.0 |
|    | 1103-01-5  | 288 | 115 | 2.50 | 0.04723 | 0.00645 | 0.12647 | 0.01717 | 0.01941 | 0.00042 | 0.00400 | 0.00061 | 0.04 | 61   | 262 | 121 | 15  | 124 | 3.0  | 81  | 12 | 1.0 |
|    | 1103-01-6  | 471 | 144 | 3.27 | 0.04897 | 0.00593 | 0.12496 | 0.01503 | 0.01850 | 0.00039 | 0.00347 | 0.00050 | 0.05 | 146  | 256 | 120 | 14  | 118 | 2.0  | 70  | 10 | 1.0 |
|    | 1103-01-7  | 308 | 116 | 2.66 | 0.05123 | 0.01035 | 0.13058 | 0.02604 | 0.01845 | 0.00066 | 0.00597 | 0.00278 | 0.02 | 251  | 378 | 125 | 23  | 118 | 4.0  | 120 | 56 | 0.9 |
|    | 1103-01-8  | 539 | 186 | 2.89 | 0.05270 | 0.00474 | 0.13133 | 0.01173 | 0.01807 | 0.00035 | 0.00481 | 0.00096 | 0.08 | 316  | 206 | 125 | 11  | 115 | 2.0  | 97  | 19 | 0.9 |
|    | 1103-01-9  | 353 | 114 | 3.09 | 0.04874 | 0.00703 | 0.13249 | 0.01898 | 0.01971 | 0.00045 | 0.00585 | 0.00115 | 0.04 | 135  | 289 | 126 | 17  | 126 | 3.0  | 118 | 23 | 1.0 |
|    | 1103-01-10 | 223 | 84  | 2.66 | 0.05154 | 0.00953 | 0.13432 | 0.02464 | 0.01890 | 0.00051 | 0.00526 | 0.00136 | 0.02 | 265  | 354 | 128 | 22  | 121 | 3.0  | 106 | 27 | 0.9 |
|    | 1103-01-11 | 314 | 82  | 3.81 | 0.05456 | 0.00985 | 0.14116 | 0.02529 | 0.01876 | 0.00050 | 0.00529 | 0.00124 | 0.02 | 394  | 372 | 134 | 23  | 120 | 3.0  | 107 | 25 | 0.9 |
|    | 1103-01-12 | 185 | 72  | 2.58 | 0.04905 | 0.01167 | 0.12556 | 0.02969 | 0.01857 | 0.00056 | 0.00498 | 0.00133 | 0.02 | 150  | 416 | 120 | 27  | 119 | 4.0  | 100 | 27 | 1.0 |
|    | 1103-01-13 | 229 | 84  | 2.73 | 0.05717 | 0.01017 | 0.14149 | 0.02496 | 0.01795 | 0.00049 | 0.00501 | 0.00146 | 0.02 | 498  | 384 | 134 | 22  | 115 | 3.0  | 101 | 29 | 0.9 |
|    | 1103-01-14 | 276 | 104 | 2.66 | 0.05206 | 0.00822 | 0.13265 | 0.02077 | 0.01848 | 0.00045 | 0.00518 | 0.00162 | 0.02 | 288  | 326 | 126 | 19  | 118 | 3.0  | 104 | 33 | 0.9 |
|    | 1103-01-15 | 500 | 185 | 2.70 | 0.04856 | 0.00465 | 0.12773 | 0.01211 | 0.01908 | 0.00038 | 0.00446 | 0.00102 | 0.06 | 127  | 214 | 122 | 11  | 122 | 2.0  | 90  | 21 | 1.0 |
| D2 | LZ2-17-01  | 928 | 168 | 5.54 | 0.05038 | 0.00298 | 0.12786 | 0.00735 | 0.01841 | 0.00036 | 0.00556 | 0.00044 | 0.08 | 213  | 137 | 122 | 7   | 118 | 2.0  | 112 | 9  | 1.0 |
|    | LZ2-17-02  | 169 | 55  | 3.10 | 0.06426 | 0.00464 | 0.16119 | 0.01135 | 0.01819 | 0.00038 | 0.00611 | 0.00055 | 0.06 | 750  | 157 | 152 | 40  | 116 | 2.0  | 123 | 11 | 0.8 |
|    | LZ2-17-03  | 21  | 386 | 0.06 | 0.05592 | 0.00253 | 0.22586 | 0.00972 | 0.02930 | 0.00042 | 0.00912 | 0.00123 | 0.18 | 449  | 103 | 207 | 8   | 186 | 3.0  | 184 | 25 | 0.9 |
|    | LZ2-17-04  | 698 | 179 | 3.90 | 0.07536 | 0.01290 | 0.17753 | 0.03006 | 0.01708 | 0.00043 | 0.00514 | 0.00012 | 0.62 | 1078 | 372 | 166 | 26  | 109 | 3.0  | 104 | 2  | 0.7 |
|    | LZ2-17-05  | 474 | 83  | 5.69 | 0.05264 | 0.00513 | 0.13179 | 0.01247 | 0.01816 | 0.00050 | 0.00612 | 0.00059 | 0.04 | 313  | 223 | 126 | 11  | 116 | 3.0  | 123 | 12 | 0.9 |
|    | LZ2-17-06  | 418 | 68  | 6.13 | 0.06441 | 0.01797 | 0.15135 | 0.04185 | 0.01704 | 0.00064 | 0.00522 | 0.00026 | 0.62 | 755  | 565 | 143 | 37  | 109 | 4.0  | 105 | 5  | 0.8 |
|    | LZ2-17-07  | 864 | 142 | 6.09 | 0.07875 | 0.01905 | 0.18489 | 0.04434 | 0.01703 | 0.00053 | 0.00510 | 0.00013 | 0.74 | 1166 | 536 | 172 | 38  | 109 | 3.0  | 103 | 3  | 0.6 |
|    | LZ2-17-08  | 954 | 209 | 4.57 | 0.04695 | 0.00189 | 0.11890 | 0.00471 | 0.01837 | 0.00029 | 0.00555 | 0.00057 | 0.16 | 47   | 87  | 114 | 4   | 117 | 2.0  | 112 | 11 | 1.0 |
|    | LZ2-17-09  | 255 | 60  | 4.21 | 0.14771 | 0.05290 | 0.42005 | 0.14711 | 0.02062 | 0.00154 | 0.00579 | 0.00042 | 0.72 | 2320 | 804 | 356 | 105 | 132 | 10.0 | 117 | 9  | 0.4 |
|    | LZ2-17-10  | 844 | 198 | 4.26 | 0.07729 | 0.00358 | 0.19230 | 0.00848 | 0.01805 | 0.00036 | 0.00638 | 0.00074 | 0.11 | 1129 | 95  | 179 | 7   | 115 | 2.0  | 129 | 15 | 0.6 |
|    | LZ2-17-11  | 227 | 52  | 4.40 | 0.23246 | 0.02675 | 0.68178 | 0.07403 | 0.02127 | 0.00081 | 0.00572 | 0.00029 | 0.69 | 3069 | 191 | 528 | 45  | 136 | 5.0  | 115 | 6  | 0.3 |
|    | LZ2-17-12  | 244 | 49  | 4.98 | 0.08064 | 0.00840 | 0.20263 | 0.02013 | 0.01822 | 0.00063 | 0.00490 | 0.00042 | 0.03 | 1213 | 213 | 187 | 17  | 116 | 4.0  | 99  | 8  | 0.6 |

|    |              |         |       |        |         |         |         |         |         |         |         |         |      |      |     |      |    |      |      |     |     |     |
|----|--------------|---------|-------|--------|---------|---------|---------|---------|---------|---------|---------|---------|------|------|-----|------|----|------|------|-----|-----|-----|
|    | LZ2-17-13    | 805     | 127   | 6.32   | 0.16676 | 0.00644 | 0.41734 | 0.01458 | 0.01815 | 0.00040 | 0.00577 | 0.00037 | 0.14 | 2525 | 66  | 354  | 10 | 116  | 3.0  | 116 | 7   | 0.3 |
|    | LZ2-17-14    | 1777    | 461   | 3.85   | 0.04976 | 0.00130 | 0.12577 | 0.00329 | 0.01833 | 0.00026 | 0.00457 | 0.00028 | 0.27 | 184  | 62  | 120  | 3  | 117  | 2.0  | 92  | 6   | 1.0 |
|    | LZ2-17-15    | 439     | 114   | 3.84   | 0.09186 | 0.00970 | 0.22476 | 0.02302 | 0.01775 | 0.00045 | 0.00523 | 0.00013 | 0.48 | 1464 | 209 | 206  | 19 | 113  | 3.0  | 105 | 3   | 0.5 |
|    | LZ2-17-16    | 1063    | 357   | 2.98   | 0.08186 | 0.00195 | 0.20533 | 0.00484 | 0.01819 | 0.00026 | 0.00589 | 0.00039 | 0.29 | 1242 | 48  | 190  | 4  | 116  | 2.0  | 119 | 8   | 0.6 |
|    | LZ2-17-17    | 319     | 75    | 4.27   | 0.09598 | 0.01140 | 0.23642 | 0.02719 | 0.01786 | 0.00053 | 0.00524 | 0.00015 | 0.48 | 1547 | 234 | 215  | 22 | 114  | 3.0  | 106 | 3   | 0.5 |
|    | LZ2-17-18    | 1454    | 277   | 5.26   | 0.10483 | 0.00318 | 0.26391 | 0.00763 | 0.01826 | 0.00030 | 0.00584 | 0.00042 | 0.20 | 1711 | 57  | 238  | 6  | 117  | 2.0  | 118 | 8   | 0.5 |
|    | LZ2-17-19    | 488     | 129   | 3.78   | 0.05234 | 0.00217 | 0.13246 | 0.00538 | 0.01835 | 0.00030 | 0.00448 | 0.00036 | 0.15 | 300  | 97  | 126  | 5  | 117  | 2.0  | 90  | 7   | 0.9 |
|    | LZ2-17-20    | 800     | 155   | 5.15   | 0.08320 | 0.00486 | 0.20692 | 0.01140 | 0.01804 | 0.00044 | 0.00496 | 0.00053 | 0.08 | 1274 | 117 | 191  | 10 | 115  | 3.0  | 100 | 11  | 0.6 |
| D3 | 1310-01zk-01 | 596.0   | 113.2 | 5.27   | 0.05022 | 0.00960 | 0.12405 | 0.02358 | 0.01792 | 0.00047 | 0.00599 | 0.00156 | 0.01 | 205  | 324 | 119  | 21 | 114  | 3.0  | 121 | 31  | 1.0 |
|    | 1310-01zk-02 | 378.7   | 193.5 | 1.96   | 0.04700 | 0.00642 | 0.14239 | 0.01930 | 0.02198 | 0.00057 | 0.00230 | 0.00034 | 0.01 | 49   | 230 | 135  | 17 | 140  | 4.0  | 46  | 7   | 1.0 |
|    | 1310-01zk-03 | 344.2   | 101.1 | 3.40   | 0.04905 | 0.00915 | 0.15340 | 0.02846 | 0.02269 | 0.00061 | 0.00304 | 0.00047 | 0.01 | 150  | 306 | 145  | 25 | 145  | 4.0  | 61  | 9   | 1.0 |
|    | 1310-01zk-04 | 274.8   | 83.4  | 3.29   | 0.04592 | 0.01353 | 0.11767 | 0.03452 | 0.01859 | 0.00061 | 0.00631 | 0.00204 | 0.01 | -6   | 431 | 113  | 31 | 119  | 4.0  | 127 | 41  | 1.1 |
|    | 1310-01zk-05 | 1295.2  | 412.8 | 3.14   | 0.05115 | 0.00277 | 0.26303 | 0.01419 | 0.03731 | 0.00077 | 0.00335 | 0.00046 | 0.01 | 248  | 86  | 237  | 11 | 236  | 5.0  | 68  | 9   | 1.0 |
|    | 1310-01zk-06 | 1252.3  | 188.9 | 6.63   | 0.04876 | 0.00487 | 0.13173 | 0.01310 | 0.01960 | 0.00037 | 0.00631 | 0.00154 | 0.01 | 136  | 187 | 126  | 12 | 125  | 2.0  | 127 | 31  | 1.0 |
|    | 1310-01zk-07 | 745.1   | 167.9 | 4.44   | 0.04837 | 0.00956 | 0.12269 | 0.02408 | 0.01840 | 0.00057 | 0.00257 | 0.00051 | 0.01 | 117  | 311 | 118  | 22 | 118  | 4.0  | 52  | 10  | 1.0 |
|    | 1310-01zk-08 | 226.9   | 73.0  | 3.11   | 0.04920 | 0.01864 | 0.11691 | 0.04407 | 0.01724 | 0.00072 | 0.00341 | 0.00074 | 0.01 | 157  | 579 | 112  | 40 | 110  | 5.0  | 69  | 15  | 1.0 |
|    | 1310-01zk-09 | 959.6   | 169.9 | 5.65   | 0.04840 | 0.00553 | 0.13107 | 0.01493 | 0.01964 | 0.00039 | 0.00427 | 0.00085 | 0.01 | 119  | 215 | 125  | 13 | 125  | 2.0  | 86  | 17  | 1.0 |
|    | 1310-01zk-10 | 280.9   | 84.4  | 3.33   | 0.09719 | 0.01434 | 0.30735 | 0.04411 | 0.02295 | 0.00086 | 0.01036 | 0.00552 | 0.01 | 1571 | 217 | 272  | 34 | 146  | 5.0  | 208 | 110 | 0.5 |
|    | 1310-01zk-11 | 19114.4 | ##### | 19.11  | 0.04844 | 0.00209 | 0.12960 | 0.00565 | 0.01941 | 0.00036 | 0.00186 | 0.00020 | 0.01 | 121  | 67  | 124  | 5  | 124  | 2.0  | 38  | 4   | 1.0 |
|    | 1310-01zk-12 | 25602.4 | ##### | 14.67  | 0.04924 | 0.00222 | 0.13098 | 0.00589 | 0.01932 | 0.00040 | 0.00096 | 0.00009 | 0.01 | 159  | 67  | 125  | 5  | 123  | 3.0  | 19  | 2   | 1.0 |
|    | 1310-01zk-13 | 19310.1 | 918.2 | 21.03  | 0.04872 | 0.00307 | 0.12661 | 0.00784 | 0.01889 | 0.00044 | 0.00087 | 0.00008 | 0.01 | 134  | 97  | 121  | 7  | 121  | 3.0  | 18  | 2   | 1.0 |
|    | 1310-01zk-14 | 11789.3 | 589.4 | 20.00  | 0.04874 | 0.00462 | 0.13039 | 0.01215 | 0.01942 | 0.00053 | 0.00131 | 0.00018 | 0.01 | 135  | 158 | 124  | 11 | 124  | 3.0  | 26  | 4   | 1.0 |
|    | 1310-01zk-15 | 25892.8 | ##### | 13.14  | 0.04864 | 0.00116 | 0.12349 | 0.00314 | 0.01842 | 0.00029 | 0.00235 | 0.00028 | 0.01 | 131  | 32  | 118  | 3  | 118  | 2.0  | 47  | 6   | 1.0 |
|    | 1310-01zk-16 | 10658.1 | 680.3 | 15.67  | 0.04828 | 0.00191 | 0.12586 | 0.00505 | 0.01891 | 0.00031 | 0.00255 | 0.00029 | 0.01 | 113  | 63  | 120  | 5  | 121  | 2.0  | 51  | 6   | 1.0 |
|    | 1310-01zk-17 | 34265.7 | ##### | 17.46  | 0.04910 | 0.00194 | 0.13368 | 0.00527 | 0.01977 | 0.00039 | 0.00075 | 0.00006 | 0.01 | 153  | 56  | 127  | 5  | 126  | 2.0  | 15  | 1   | 1.0 |
|    | 1310-01zk-18 | 54748.3 | 404.4 | 135.38 | 0.09838 | 0.00336 | 3.61031 | 0.12574 | 0.26636 | 0.00484 | 0.03948 | 0.01146 | 0.01 | 1594 | 38  | 1552 | 28 | 1522 | 25.0 | 783 | 223 | 1.0 |
|    | 1310-01zk-19 | 4449.6  | 361.1 | 12.32  | 0.11325 | 0.00808 | 0.32833 | 0.02237 | 0.02104 | 0.00062 | 0.00144 | 0.00020 | 0.01 | 1852 | 81  | 288  | 17 | 134  | 4.0  | 29  | 4   | 0.5 |
|    | 1310-01zk-20 | 20367.5 | ##### | 14.11  | 0.04862 | 0.00194 | 0.13491 | 0.00543 | 0.02014 | 0.00038 | 0.00152 | 0.00019 | 0.01 | 130  | 59  | 129  | 5  | 129  | 2.0  | 31  | 4   | 1.0 |
| D4 | 150118-02-01 | 368.1   | 171.0 | 2.15   | 0.04963 | 0.00157 | 0.15053 | 0.00462 | 0.02200 | 0.00036 | 0.00674 | 0.00024 | 0.21 | 178  | 76  | 142  | 4  | 140  | 2.0  | 136 | 5   | 1.0 |
|    | 150118-02-02 | 456.2   | 269.9 | 1.69   | 0.05073 | 0.00156 | 0.12701 | 0.00378 | 0.01816 | 0.00030 | 0.00480 | 0.00018 | 0.22 | 229  | 73  | 121  | 3  | 116  | 2.0  | 97  | 4   | 1.0 |
|    | 150118-02-03 | 258.8   | 148.9 | 1.74   | 0.04926 | 0.00182 | 0.15975 | 0.00570 | 0.02353 | 0.00041 | 0.00671 | 0.00028 | 0.17 | 160  | 87  | 150  | 5  | 150  | 3.0  | 135 | 6   | 1.0 |
|    | 150118-02-04 | 221.9   | 153.5 | 1.45   | 0.05100 | 0.00251 | 0.12872 | 0.00611 | 0.01831 | 0.00037 | 0.00517 | 0.00029 | 0.12 | 241  | 116 | 123  | 5  | 117  | 2.0  | 104 | 6   | 1.0 |
|    | 150118-02-05 | 48.2    | 40.0  | 1.21   | 0.04851 | 0.00603 | 0.12838 | 0.01549 | 0.01919 | 0.00065 | 0.00538 | 0.00056 | 0.03 | 124  | 258 | 123  | 14 | 123  | 4.0  | 108 | 11  | 1.0 |
|    | 150118-02-06 | 487.4   | 304.3 | 1.60   | 0.04847 | 0.00213 | 0.12164 | 0.00516 | 0.01820 | 0.00036 | 0.00439 | 0.00027 | 0.15 | 122  | 100 | 117  | 5  | 116  | 2.0  | 89  | 5   | 1.0 |
|    | 150118-02-07 | 225.0   | 164.0 | 1.37   | 0.05134 | 0.00223 | 0.13309 | 0.00557 | 0.01881 | 0.00035 | 0.00588 | 0.00034 | 0.14 | 256  | 102 | 127  | 5  | 120  | 2.0  | 118 | 7   | 0.9 |
|    | 150118-02-08 | 55.6    | 41.3  | 1.35   | 0.05028 | 0.00813 | 0.12119 | 0.01891 | 0.01749 | 0.00079 | 0.00436 | 0.00070 | 0.02 | 208  | 327 | 116  | 17 | 112  | 5.0  | 88  | 14  | 1.0 |
|    | 150118-02-09 | 109.8   | 106.2 | 1.03   | 0.04907 | 0.00143 | 0.13511 | 0.00383 | 0.01997 | 0.00030 | 0.00634 | 0.00025 | 0.21 | 151  | 70  | 129  | 3  | 127  | 2.0  | 128 | 5   | 1.0 |
|    | 150118-02-10 | 380.7   | 249.0 | 1.53   | 0.04861 | 0.00110 | 0.11947 | 0.00266 | 0.01783 | 0.00026 | 0.00544 | 0.00021 | 0.30 | 129  | 54  | 115  | 2  | 114  | 2.0  | 110 | 4   | 1.0 |
|    | 150118-02-11 | 35.4    | 31.3  | 1.13   | 0.04848 | 0.00367 | 0.12975 | 0.00962 | 0.01941 | 0.00040 | 0.00610 | 0.00032 | 0.06 | 123  | 170 | 124  | 9  | 124  | 3.0  | 123 | 6   | 1.0 |
|    | 150118-02-12 | 150.5   | 115.5 | 1.30   | 0.04817 | 0.00147 | 0.11913 | 0.00356 | 0.01794 | 0.00027 | 0.00548 | 0.00016 | 0.21 | 108  | 71  | 114  | 3  | 115  | 2.0  | 110 | 3   | 1.0 |
|    | 150118-02-13 | 167.1   | 162.0 | 1.03   | 0.04944 | 0.00273 | 0.13182 | 0.00699 | 0.01933 | 0.00041 | 0.00628 | 0.00042 | 0.09 | 169  | 126 | 126  | 6  | 123  | 3.0  | 127 | 8   | 1.0 |
|    | 150118-02-14 | 343.2   | 203.7 | 1.68   | 0.04786 | 0.00271 | 0.11954 | 0.00651 | 0.01811 | 0.00038 | 0.00536 | 0.00036 | 0.09 | 92   | 126 | 115  | 6  | 116  | 2.0  | 108 | 7   | 1.0 |
|    | 150118-02-15 | 119.4   | 64.3  | 1.86   | 0.04956 | 0.00372 | 0.12756 | 0.00926 | 0.01867 | 0.00045 | 0.00534 | 0.00034 | 0.06 | 174  | 171 | 122  | 8  | 119  | 3.0  | 108 | 7   | 1.0 |
|    | 150118-02-16 | 251.7   | 110.3 | 2.28   | 0.04955 | 0.00221 | 0.14299 | 0.00617 | 0.02093 | 0.00038 | 0.00666 | 0.00032 | 0.13 | 174  |     |      |    |      |      |     |     |     |



|           |     |     |      |        |     |       |     |         |     |      |      |       |     |
|-----------|-----|-----|------|--------|-----|-------|-----|---------|-----|------|------|-------|-----|
| zj28-1.1  | 193 | 222 | 0.9  | 0.06   | 35  | 0.168 | 36  | 0.02037 | 2.6 | 597  | 770  | 130   | 3.4 |
| zj28-1.2  | 166 | 168 | 1.02 | 0.011  | 95  | 0.03  | 95  | 0.01971 | 2.6 | -700 | 120  | 125.8 | 3.3 |
| zj28-1.3  | 346 | 263 | 1.36 | 0.025  | 50  | 0.07  | 50  | 0.01982 | 2.6 | -169 | 170  | 126.5 | 3.2 |
| zj28-1.4  | 72  | 86  | 0.86 | 0.046  | 23  | 0.119 | 23  | 0.01882 | 2.8 | -16  | 550  | 120.2 | 3.3 |
| zj28-1.5  | 449 | 364 | 1.27 | 0.0719 | 6.1 | 0.205 | 6.6 | 0.02067 | 2.4 | 984  | 120  | 131.9 | 3.1 |
| zj28-1.6  | 270 | 297 | 0.94 | 0.055  | 22  | 0.153 | 23  | 0.0201  | 2.1 | 417  | 500  | 128.3 | 2.7 |
| zj28-1.7  | 63  | 141 | 0.46 | 0.062  | 43  | 0.174 | 44  | 0.02053 | 4   | 662  | 930  | 131   | 5.3 |
| zj28-1.8  | 320 | 271 | 1.22 | 0.056  | 28  | 0.162 | 28  | 0.02112 | 2.5 | 435  | 620  | 134.7 | 3.4 |
| zj28-1.9  | 239 | 298 | 0.83 | 0.032  | 56  | 0.09  | 55  | 0.02014 | 2.5 | -940 | 1600 | 128.5 | 3.2 |
| zj28-1.10 | 162 | 129 | 1.29 | 0.079  | 36  | 0.207 | 36  | 0.019   | 3.7 | 1174 | 710  | 121.3 | 4.6 |
| zj28-1.11 | 213 | 196 | 1.12 | 0.028  | 84  | 0.08  | 84  | 0.02051 | 3.2 | -134 | 2700 | 130.9 | 4.2 |
| zj28-1.12 | 277 | 313 | 0.92 | 0.0765 | 8.8 | 0.216 | 9   | 0.0205  | 1.8 | 1107 | 180  | 130.8 | 2.4 |
| zj28-1.13 | 258 | 208 | 1.28 | 0.061  | 40  | 0.162 | 40  | 0.01919 | 3.2 | 652  | 850  | 122.5 | 3.9 |
| zj28-1.14 | 293 | 360 | 0.84 | 0.067  | 17  | 0.192 | 17  | 0.02088 | 2.1 | 828  | 360  | 133.2 | 2.8 |

M2, central Shengzhou basin (Li JH et al., 2014)

|               |      |      |      |        |     |         |         |         |         |      |      |       |      |
|---------------|------|------|------|--------|-----|---------|---------|---------|---------|------|------|-------|------|
| zj30-1.1      | 367  | 213  | 1.78 | 0.053  | 46  | 0.135   | 46      | 0.01831 | 3.3     | 340  | 1000 | 117   | 3.9  |
| zj30-1.2      | 102  | 82   | 1.28 | 0.113  | 1   | 0.301   | 18      | 0.01937 | 4.1     | 1845 | 320  | 123.6 | 5.1  |
| zj30-1.3      | 92   | 201  | 0.47 | 0.0765 | 2.4 | 2.08    | 2.9     | 0.1971  | 1.6     | 1109 | 48   | 1160  | 17.0 |
| zj30-1.4      | 96   | 83   | 1.19 | 0.076  | 84  | 0.2     | 85      | 0.0192  | 8       | 1090 | 170  | 122.6 | 10.0 |
| zj30-1.5      | 229  | 139  | 1.7  | 0.095  | 23  | 0.248   | 23      | 0.01896 | 3.4     | 1529 | 440  | 121.1 | 4.1  |
| zj30-1.6      | 111  | 90   | 1.27 | 0.046  | 86  | 0.12    | 86      | 0.01908 | 4.5     | 20   | 2100 | 121.8 | 5.6  |
| zj30-1.7      | 188  | 162  | 1.2  | 0.088  | 16  | 0.252   | 16      | 0.02083 | 2.2     | 1375 | 300  | 132.9 | 3.0  |
| zj30-1.8      | 94   | 73   | 1.32 | 330    | 27  | 0.0182  | 7.4     | 116.1   | 8.8     |      |      |       |      |
| zj30-1.9      | 129  | 100  | 1.34 |        |     | 0.0181  | 6.3     | 115.6   | 7.3     |      |      |       |      |
| zj30-1.10     | 181  | 132  | 1.41 | 0.068  | 21  | 0.176   | 21      | 0.01877 | 2.5     | 863  | 440  | 119.9 | 2.9  |
| zj30-1.11     | 164  | 109  | 1.55 | 0.071  | 62  | 0.18    | 62      | 0.0182  | 5.7     | 950  | 1300 | 116.2 | 6.7  |
| zj30-1.12     | 94   | 80   | 1.22 | 0.077  | 60  | 0.2     | 60      | 0.0192  | 6.2     | 1130 | 1200 | 122.8 | 7.8  |
| zj30-1.13     | 262  | 273  | 0.99 | 0.06   | 18  | 0.169   | 18      | 0.02024 | 2.1     | 621  | 380  | 129.2 | 2.7  |
| DY11-130-1-1  | 405  | 337  | 1.20 |        |     | 0.14431 | 0.00177 | 0.02067 | 0.00016 |      |      | 132   | 1.0  |
| DY11-130-1-2  | 659  | 397  | 1.66 |        |     | 0.13908 | 0.00187 | 0.02049 | 0.00021 |      |      | 131   | 1.3  |
| DY11-130-1-3  | 337  | 210  | 1.60 |        |     | 0.14767 | 0.00286 | 0.02122 | 0.00024 |      |      | 135   | 1.5  |
| DY11-130-1-4  | 243  | 163  | 1.48 |        |     | 0.14591 | 0.00248 | 0.02081 | 0.00022 |      |      | 133   | 1.4  |
| DY11-130-1-5  | 1161 | 1056 | 1.10 |        |     | 0.16176 | 0.00229 | 0.02081 | 0.00026 |      |      | 133   | 1.6  |
| DY11-130-1-6  | 295  | 320  | 0.92 |        |     | 0.14497 | 0.00177 | 0.02089 | 0.00019 |      |      | 133   | 1.2  |
| DY11-130-1-7  | 206  | 181  | 1.14 |        |     | 0.14175 | 0.00639 | 0.02062 | 0.00055 |      |      | 132   | 3.5  |
| DY11-130-1-8  | 183  | 129  | 1.42 |        |     | 0.14337 | 0.00269 | 0.02106 | 0.00025 |      |      | 134   | 1.6  |
| DY11-130-1-9  | 129  | 128  | 1.00 |        |     | 0.14451 | 0.00451 | 0.02067 | 0.00050 |      |      | 132   | 3.2  |
| DY11-130-1-10 | 142  | 106  | 1.35 |        |     | 0.17025 | 0.00367 | 0.02041 | 0.00023 |      |      | 130   | 1.4  |
| DY11-130-1-11 | 129  | 161  | 0.81 |        |     | 0.21860 | 0.01538 | 0.02101 | 0.00036 |      |      | 134   | 2.3  |
| DY11-130-1-12 | 331  | 399  | 0.83 |        |     | 0.13775 | 0.00347 | 0.02079 | 0.00042 |      |      | 133   | 2.6  |
| DY11-130-1-13 | 301  | 239  | 1.26 |        |     | 0.14261 | 0.00271 | 0.02063 | 0.00032 |      |      | 132   | 2.0  |
| DY11-130-1-14 | 218  | 234  | 0.93 |        |     | 0.14650 | 0.00453 | 0.02090 | 0.00036 |      |      | 133   | 2.3  |
| DY11-130-1-15 | 286  | 295  | 0.97 |        |     | 0.13717 | 0.00294 | 0.02036 | 0.00030 |      |      | 130   | 1.9  |
| DY11-130-1-16 | 526  | 998  | 0.53 |        |     | 0.14440 | 0.00587 | 0.02089 | 0.00052 |      |      | 133   | 3.3  |
| DY11-130-1-17 | 149  | 154  | 0.97 |        |     | 0.15283 | 0.00401 | 0.02159 | 0.00032 |      |      | 138   | 2.0  |
| DY11-130-1-18 | 155  | 128  | 1.21 |        |     | 0.15125 | 0.00439 | 0.02135 | 0.00035 |      |      | 136   | 2.2  |
| DY11-130-1-19 | 712  | 401  | 1.78 |        |     | 0.14256 | 0.00455 | 0.02089 | 0.00046 |      |      | 133   | 2.9  |
| DY11-130-1-20 | 123  | 152  | 0.81 |        |     | 0.14938 | 0.00364 | 0.02117 | 0.00034 |      |      | 135   | 2.1  |
| DY11-132-1-1  | 132  | 168  | 0.78 |        |     | 0.13887 | 0.00264 | 0.02011 | 0.00022 |      |      | 128   | 1.4  |
| DY11-132-1-2  | 132  | 148  | 0.89 |        |     | 0.13936 | 0.00308 | 0.02011 | 0.00026 |      |      | 128   | 1.6  |
| DY11-132-1-3  | 119  | 126  | 0.94 |        |     | 0.13467 | 0.00690 | 0.02080 | 0.00024 |      |      | 133   | 1.5  |
| DY11-132-1-4  | 182  | 181  | 1.00 |        |     | 0.14471 | 0.00285 | 0.02060 | 0.00015 |      |      | 131   | 1.0  |
| DY11-132-1-5  | 104  | 131  | 0.79 |        |     | 0.14594 | 0.00396 | 0.02090 | 0.00028 |      |      | 133   | 1.8  |
| DY11-132-1-6  | 102  | 114  | 0.89 |        |     | 0.14363 | 0.00319 | 0.02056 | 0.00017 |      |      | 131   | 1.1  |
| DY11-132-1-7  | 150  | 167  | 0.90 |        |     | 0.14003 | 0.00874 | 0.02044 | 0.00036 |      |      | 130   | 2.3  |
| DY11-132-1-8  | 162  | 153  | 1.06 |        |     | 0.14120 | 0.00213 | 0.02079 | 0.00013 |      |      | 133   | 0.8  |
| DY11-132-1-9  | 125  | 170  | 0.73 |        |     | 0.15213 | 0.00274 | 0.02063 | 0.00014 |      |      | 132   | 0.9  |
| DY11-132-1-10 | 154  | 144  | 1.07 |        |     | 0.14258 | 0.00197 | 0.02080 | 0.00013 |      |      | 133   | 0.9  |
| DY11-132-1-11 | 826  | 603  | 1.37 |        |     | 0.14052 | 0.00108 | 0.02039 | 0.00012 |      |      | 130   | 0.8  |
| DY11-132-1-12 | 78   | 92   | 0.84 |        |     | 0.14296 | 0.00303 | 0.02077 | 0.00018 |      |      | 133   | 1.1  |
| DY11-132-1-13 | 198  | 165  | 1.20 |        |     | 0.13645 | 0.00396 | 0.02060 | 0.00017 |      |      | 131   | 1.1  |
| DY11-132-1-14 | 667  | 386  | 1.73 |        |     | 0.13695 | 0.00280 | 0.02033 | 0.00017 |      |      | 130   | 1.1  |
| DY11-132-1-15 | 156  | 133  | 1.17 |        |     | 0.13830 | 0.00179 | 0.01977 | 0.00013 |      |      | 126   | 0.8  |
| DY11-132-1-16 | 291  | 236  | 1.23 |        |     | 0.14068 | 0.00277 | 0.02037 | 0.00018 |      |      | 130   | 1.1  |
| DY11-132-1-17 | 282  | 208  | 1.35 |        |     | 0.14139 | 0.00160 | 0.02073 | 0.00013 |      |      | 132   | 0.8  |
| DY11-132-1-18 | 258  | 179  | 1.44 |        |     | 0.14029 | 0.00201 | 0.02048 | 0.00013 |      |      | 131   | 0.8  |
| DY11-132-1-19 | 538  | 378  | 1.42 |        |     | 0.14525 | 0.00126 | 0.02076 | 0.00013 |      |      | 132   | 0.8  |
| DY11-132-1-20 | 79   | 94   | 0.84 |        |     | 0.13660 | 0.00427 | 0.01986 | 0.00020 |      |      | 127   | 1.3  |
| DY11-133-1-1  | 86   | 120  | 0.72 |        |     | 0.13609 | 0.00193 | 0.02031 | 0.00025 |      |      | 130   | 1.6  |
| DY11-133-1-2  | 29   | 50   | 0.59 |        |     | 0.14187 | 0.00513 | 0.02062 | 0.00052 |      |      | 132   | 3.3  |
| DY11-133-1-3  | 29   | 69   | 0.43 |        |     | 0.14455 | 0.00359 | 0.02071 | 0.00038 |      |      | 132   | 2.4  |
| DY11-133-1-4  | 79   | 110  | 0.72 |        |     | 0.13398 | 0.00338 | 0.01973 | 0.00032 |      |      | 126   | 2.0  |
| DY11-133-1-5  | 46   | 67   | 0.69 |        |     | 0.13535 | 0.00396 | 0.02042 | 0.00036 |      |      | 130   | 2.3  |
| DY11-133-1-6  | 19   | 36   | 0.52 |        |     | 0.13886 | 0.00611 | 0.01888 | 0.00037 |      |      | 121   | 2.3  |
| DY11-133-1-7  | 33   | 67   | 0.49 |        |     | 0.13675 | 0.00641 | 0.01988 | 0.00043 |      |      | 127   | 2.7  |
| DY11-133-1-8  | 80   | 108  | 0.74 |        |     | 0.17412 | 0.00478 | 0.01990 | 0.00022 |      |      | 127   | 1.4  |
| DY11-133-1-9  | 62   | 90   | 0.69 |        |     | 0.14079 | 0.00472 | 0.02040 | 0.00043 |      |      | 130   | 2.7  |
| DY11-133-1-10 | 64   | 86   | 0.75 |        |     | 0.14989 | 0.00500 | 0.02115 | 0.00064 |      |      | 135   | 4.0  |
| DY11-133-1-11 | 68   | 82   | 0.83 |        |     | 0.13402 | 0.00383 | 0.02031 | 0.00037 |      |      | 130   | 2.3  |
| DY11-133-1-12 | 35   | 50   | 0.71 |        |     | 0.15109 | 0.01529 | 0.02150 | 0.00078 |      |      | 137   | 5.0  |
| DY11-133-1-13 | 150  | 154  | 0.98 |        |     | 0.37442 | 0.01156 | 0.02146 | 0.00024 |      |      | 137   | 1.5  |



|               |     |     |      |  |  |  |         |         |         |         |  |  |  |  |  |  |     |     |
|---------------|-----|-----|------|--|--|--|---------|---------|---------|---------|--|--|--|--|--|--|-----|-----|
| DY11-133-1-14 | 39  | 51  | 0.76 |  |  |  | 0.15106 | 0.00561 | 0.02103 | 0.00034 |  |  |  |  |  |  | 134 | 2.2 |
| DY11-133-1-15 | 101 | 111 | 0.91 |  |  |  | 0.14373 | 0.00224 | 0.02087 | 0.00024 |  |  |  |  |  |  | 133 | 1.5 |
| DY11-133-1-16 | 22  | 52  | 0.42 |  |  |  | 0.14660 | 0.00834 | 0.02120 | 0.00088 |  |  |  |  |  |  | 135 | 5.5 |
| DY11-133-1-17 | 51  | 67  | 0.77 |  |  |  | 0.14104 | 0.00327 | 0.02093 | 0.00025 |  |  |  |  |  |  | 134 | 1.6 |
| DY11-133-1-18 | 144 | 162 | 0.87 |  |  |  | 0.13442 | 0.00266 | 0.01944 | 0.00029 |  |  |  |  |  |  | 124 | 1.8 |
| DY11-133-1-19 | 87  | 118 | 0.74 |  |  |  | 0.13766 | 0.00308 | 0.02068 | 0.00029 |  |  |  |  |  |  | 132 | 1.8 |
| DY11-133-1-20 | 107 | 107 | 1.01 |  |  |  | 0.14199 | 0.00223 | 0.02090 | 0.00022 |  |  |  |  |  |  | 133 | 1.4 |

M3, W Tiantai basin (Li JH et al., 2014)

|              |      |      |      |       |    |  |         |         |         |         |     |  |      |      |  |  |       |      |
|--------------|------|------|------|-------|----|--|---------|---------|---------|---------|-----|--|------|------|--|--|-------|------|
| zj53-1.1     | 32   | 23   | 1.4  |       |    |  |         |         | 0.0204  | 17      |     |  | 270  | 6300 |  |  | 127.4 | 7.0  |
| zj53-1.2     | 45   | 29   | 1.62 | 0.201 | 20 |  | 0.65    | 21      |         | 0.0232  | 6.5 |  | 2840 | 330  |  |  | 120.2 | 5.0  |
| zj53-1.3     | 22   | 15   | 1.56 | 0.29  | 35 |  | 0.95    | 40      |         | 0.0234  | 18  |  | 3439 | 550  |  |  | 114   | 6.7  |
| zj53-1.4     | 37   | 28   | 1.37 |       |    |  | 0.0179  | 9       |         |         |     |  |      |      |  |  | 120.4 | 4.5  |
| zj53-1.5     | 17   | 14   | 1.28 | 0.263 | 10 |  | 0.842   | 12      |         | 0.0232  | 5.8 |  | 3267 | 160  |  |  | 108.4 | 5.9  |
| zj53-1.6     | 26   | 20   | 1.37 | 0.137 | 56 |  | 0.4     | 57      |         | 0.0214  | 11  |  | 2190 | 980  |  |  | 121.4 | 6.1  |
| zj53-1.7     | 10   | 9    | 1.24 |       |    |  | 0.0153  | 32      |         |         |     |  |      |      |  |  | 129   | 10.0 |
| zj53-1.8     | 47   | 32   | 1.5  |       |    |  | 0.0174  | 7.3     |         |         |     |  |      |      |  |  | 113.6 | 4.9  |
| zj53-1.9     | 35   | 24   | 1.51 | 0.108 | 27 |  | 0.303   | 27      |         | 0.02031 | 3.6 |  | 1769 | 490  |  |  | 120   | 6.4  |
| zj53-1.10    | 64   | 27   | 2.4  |       |    |  | 0.0173  | 16      |         |         |     |  |      |      |  |  | 104.7 | 5.7  |
| zj53-1.11    | 23   | 20   | 1.2  | 0.127 | 34 |  | 0.38    | 35      |         | 0.0216  | 6.1 |  | 2058 | 610  |  |  | 124.1 | 6.9  |
| DY11-10-2-1  | 473  | 277  | 1.71 |       |    |  | 0.13421 | 0.00313 | 0.01999 | 0.00044 |     |  |      |      |  |  | 128   | 2.8  |
| DY11-10-2-2  | 876  | 625  | 1.40 |       |    |  | 0.14529 | 0.00232 | 0.01999 | 0.00029 |     |  |      |      |  |  | 128   | 1.8  |
| DY11-10-2-3  | 829  | 662  | 1.25 |       |    |  | 0.15699 | 0.00112 | 0.02007 | 0.00013 |     |  |      |      |  |  | 128   | 0.8  |
| DY11-10-2-4  | 1282 | 731  | 1.75 |       |    |  | 0.17297 | 0.00272 | 0.02058 | 0.00016 |     |  |      |      |  |  | 131   | 1.0  |
| DY11-10-2-5  | 415  | 351  | 1.18 |       |    |  | 0.13757 | 0.00139 | 0.02030 | 0.00015 |     |  |      |      |  |  | 130   | 1.0  |
| DY11-10-2-6  | 1118 | 648  | 1.73 |       |    |  | 0.13797 | 0.00144 | 0.02001 | 0.00017 |     |  |      |      |  |  | 128   | 1.1  |
| DY11-10-2-7  | 2404 | 1335 | 1.80 |       |    |  | 0.14910 | 0.00317 | 0.02010 | 0.00039 |     |  |      |      |  |  | 128   | 2.5  |
| DY11-10-2-8  | 368  | 358  | 1.03 |       |    |  | 0.13823 | 0.00170 | 0.02010 | 0.00016 |     |  |      |      |  |  | 128   | 1.0  |
| DY11-10-2-9  | 409  | 340  | 1.20 |       |    |  | 0.13520 | 0.00180 | 0.02014 | 0.00021 |     |  |      |      |  |  | 129   | 1.3  |
| DY11-10-2-10 | 747  | 412  | 1.81 |       |    |  | 0.14598 | 0.00373 | 0.02028 | 0.00037 |     |  |      |      |  |  | 129   | 2.3  |
| DY11-10-2-11 | 293  | 283  | 1.04 |       |    |  | 0.14100 | 0.00408 | 0.01999 | 0.00031 |     |  |      |      |  |  | 128   | 1.9  |
| DY11-10-2-12 | 416  | 405  | 1.03 |       |    |  | 0.14321 | 0.00218 | 0.01991 | 0.00020 |     |  |      |      |  |  | 127   | 1.2  |
| DY11-10-2-13 | 601  | 468  | 1.28 |       |    |  | 0.19907 | 0.01340 | 0.02001 | 0.00055 |     |  |      |      |  |  | 128   | 3.5  |
| DY11-10-2-14 | 995  | 568  | 1.75 |       |    |  | 0.14876 | 0.00421 | 0.02018 | 0.00047 |     |  |      |      |  |  | 129   | 2.9  |
| DY11-10-2-15 | 859  | 636  | 1.35 |       |    |  | 0.13967 | 0.00136 | 0.02025 | 0.00015 |     |  |      |      |  |  | 129   | 1.0  |
| DY11-10-2-16 | 633  | 456  | 1.39 |       |    |  | 0.14070 | 0.00122 | 0.02037 | 0.00015 |     |  |      |      |  |  | 130   | 1.0  |
| DY11-10-2-17 | 798  | 607  | 1.31 |       |    |  | 0.72652 | 0.32887 | 0.10235 | 0.00297 |     |  |      |      |  |  | 628   | 17.3 |
| DY11-10-2-18 | 197  | 183  | 1.07 |       |    |  | 0.13311 | 0.00334 | 0.02012 | 0.00019 |     |  |      |      |  |  | 128   | 1.2  |
| DY11-10-2-19 | 243  | 204  | 1.19 |       |    |  | 0.14959 | 0.01225 | 0.02025 | 0.00101 |     |  |      |      |  |  | 129   | 6.4  |
| DY11-10-2-20 | 500  | 446  | 1.12 |       |    |  | 0.23573 | 0.00325 | 0.02080 | 0.00016 |     |  |      |      |  |  | 133   | 1.0  |

M4, Jingling town, Xinchang basin (Zhang et al., 2014)

|        |    |      |      |      |         |        |         |        |         |        |  |     |      |     |     |     |       |      |
|--------|----|------|------|------|---------|--------|---------|--------|---------|--------|--|-----|------|-----|-----|-----|-------|------|
| XC06   | 1  | 445  | 305  | 1.46 | 0.04180 | 0.0072 | 0.11100 | 0.0082 | 0.01930 | 0.0039 |  |     | 0.47 |     |     |     | 123.1 | 4.7  |
|        | 2  | 274  | 304  | 0.90 | 0.04040 | 0.0105 | 0.12030 | 0.0112 | 0.02160 | 0.0039 |  |     | 0.35 |     |     |     | 137.6 | 5.3  |
|        | 3  | 176  | 173  | 1.01 | 0.05050 | 0.008  | 0.13720 | 0.0099 | 0.01970 | 0.0059 |  |     | 0.59 |     |     |     | 125.7 | 7.3  |
|        | 4  | 140  | 205  | 0.68 | 0.04280 | 0.0096 | 0.11580 | 0.0103 | 0.01960 | 0.0039 |  |     | 0.38 |     |     |     | 125.2 | 4.8  |
|        | 5  | 162  | 157  | 1.03 | 0.02270 | 0.0392 | 0.05920 | 0.0397 | 0.01890 | 0.0063 |  |     | 0.16 |     |     |     | 120.8 | 7.5  |
|        | 6  | 138  | 147  | 0.94 | 0.03180 | 0.0335 | 0.08770 | 0.0337 | 0.02000 | 0.0041 |  |     | 0.12 |     |     |     | 127.6 | 5.1  |
|        | 7  | 332  | 340  | 0.98 | 0.04420 | 0.0058 | 0.12110 | 0.007  | 0.01990 | 0.0039 |  |     | 0.56 |     |     |     | 127   | 4.9  |
|        | 8  | 392  | 326  | 1.20 | 0.04230 | 0.0079 | 0.11700 | 0.0088 | 0.02000 | 0.0039 |  |     | 0.44 |     |     |     | 127.9 | 4.9  |
|        | 9  | 1092 | 1207 | 0.90 | 0.04760 | 0.0027 | 0.13400 | 0.0093 | 0.02040 | 0.0089 |  |     | 0.96 |     |     |     | 130.4 | 11.5 |
|        | 10 | 237  | 206  | 1.15 | 0.04550 | 0.0065 | 0.12380 | 0.0075 | 0.01970 | 0.0039 |  |     | 0.51 |     |     |     | 125.9 | 4.8  |
|        | 11 | 502  | 342  | 1.47 | 0.03650 | 0.0115 | 0.09840 | 0.0121 | 0.01960 | 0.0039 |  |     | 0.32 |     |     |     | 125   | 4.8  |
|        | 12 | 408  | 362  | 1.13 | 0.04870 | 0.0054 | 0.13130 | 0.0067 | 0.01960 | 0.0039 |  |     | 0.58 |     |     |     | 124.9 | 4.8  |
|        | 13 | 335  | 657  | 0.51 | 0.04840 | 0.0031 | 0.13350 | 0.005  | 0.02000 | 0.0038 |  |     | 0.77 |     |     |     | 127.7 | 4.8  |
|        | 14 | 130  | 155  | 0.84 | 0.04780 | 0.0091 | 0.12870 | 0.0111 | 0.01950 | 0.0064 |  |     | 0.57 |     |     |     | 124.6 | 7.8  |
|        | 15 | 610  | 832  | 0.73 | 0.04630 | 0.004  | 0.12840 | 0.0055 | 0.02010 | 0.0038 |  |     | 0.70 |     |     |     | 128.4 | 4.9  |
|        | 16 | 654  | 547  | 1.20 | 0.04380 | 0.0072 | 0.11630 | 0.0085 | 0.01920 | 0.0044 |  |     | 0.52 |     |     |     | 122.9 | 5.4  |
|        | 17 | 340  | 214  | 1.59 | 0.04430 | 0.0115 | 0.11870 | 0.0121 | 0.01950 | 0.0039 |  |     | 0.32 |     |     |     | 124.2 | 4.8  |
|        | 18 | 198  | 166  | 1.19 | 0.04910 | 0.0077 | 0.13790 | 0.0087 | 0.02040 | 0.0039 |  |     | 0.45 |     |     |     | 129.9 | 5.1  |
| XC07   | 1  | 281  | 240  | 1.17 | 0.04900 | 0.0077 | 0.12650 | 0.0087 | 0.01870 | 0.0039 |  |     | 0.50 |     |     |     | 119.6 | 4.7  |
|        | 2  | 189  | 225  | 0.84 | 0.04450 | 0.0071 | 0.11050 | 0.0081 | 0.01800 | 0.0039 |  |     | 0.50 |     |     |     | 115   | 4.4  |
|        | 3  | 75   | 87   | 0.86 | 0.02800 | 0.0253 | 0.06980 | 0.0256 | 0.01810 | 0.004  |  |     | 0.20 |     |     |     | 115.4 | 4.6  |
|        | 4  | 136  | 173  | 0.79 | 0.02820 | 0.0234 | 0.07100 | 0.0238 | 0.01830 | 0.0039 |  |     | 0.20 |     |     |     | 116.7 | 4.6  |
|        | 5  | 407  | 349  | 1.17 | 0.05970 | 0.0195 | 0.15550 | 0.0199 | 0.01890 | 0.0041 |  |     | 0.20 |     |     |     | 120.7 | 4.9  |
|        | 6  | 108  | 125  | 0.86 | 0.05140 | 0.009  | 0.13120 | 0.0098 | 0.01850 | 0.0039 |  |     | 0.40 |     |     |     | 118.4 | 4.6  |
|        | 7  | 228  | 149  | 1.53 | 0.04180 | 0.0103 | 0.10720 | 0.011  | 0.01860 | 0.0039 |  |     | 0.40 |     |     |     | 118.8 | 4.6  |
|        | 8  | 95   | 123  | 0.77 | 0.03740 | 0.0166 | 0.09280 | 0.0171 | 0.01800 | 0.004  |  |     | 0.20 |     |     |     | 114.8 | 4.5  |
|        | 9  | 143  | 116  | 1.23 | 0.03300 | 0.0252 | 0.07830 | 0.0255 | 0.01720 | 0.0041 |  |     | 0.20 |     |     |     | 109.9 | 4.5  |
|        | 10 | 513  | 403  | 1.27 | 0.05320 | 0.0051 | 0.13410 | 0.0064 | 0.01830 | 0.0039 |  |     | 0.60 |     |     |     | 116.7 | 4.5  |
|        | 11 | 128  | 147  | 0.87 | 0.04890 | 0.0101 | 0.12540 | 0.0108 | 0.01860 | 0.0039 |  |     | 0.40 |     |     |     | 118.9 | 4.6  |
|        | 12 | 46   | 70   | 0.66 | 0.04020 | 0.0203 | 0.09870 | 0.0207 | 0.01780 | 0.0041 |  |     | 0.20 |     |     |     | 113.8 | 4.6  |
|        | 13 | 121  | 132  | 0.92 | 0.05170 | 0.0111 | 0.13160 | 0.0135 | 0.01850 | 0.0077 |  |     | 0.60 |     |     |     | 118   | 9.0  |
|        | 14 | 386  | 262  | 1.47 | 0.04940 | 0.0058 | 0.12990 | 0.007  | 0.01910 | 0.0039 |  |     | 0.60 |     |     |     | 121.8 | 4.7  |
|        | 15 | 259  | 272  | 0.95 | 0.03190 | 0.0187 | 0.07870 | 0.0191 | 0.01790 | 0.0039 |  |     | 0.20 |     |     |     | 114.4 | 4.4  |
|        | 16 | 217  | 191  | 1.14 | 0.04820 | 0.0137 | 0.11950 | 0.0143 | 0.01800 | 0.0039 |  |     | 0.30 |     |     |     | 114.9 | 4.5  |
| FQ03-1 | 1  | N/A  | N/A  | N/A  | N/A     | N/A    | N/A     | N/A    | N/A     | N/A    |  | N/A | N/A  | N/A | N/A | N/A | N/A   | N/A  |
|        | 2  | 363  | 230  | 1.58 | 0.03500 | 0.0245 | 0.10530 | 0.0248 | 0.02180 | 0.004  |  |     | 0.20 |     |     |     | 139.2 | 5.5  |
|        | 3  | 279  | 163  | 1.71 | 0.03530 | 0.017  | 0.08570 | 0.0174 | 0.01760 | 0.0039 |  |     | 0.20 |     |     |     | 112.5 | 4.4  |
|        | 4  | 398  | 208  | 1.91 | 0.03560 | 0.0163 | 0.08970 | 0.0176 | 0.01830 | 0.0064 |  |     | 0.40 |     |     |     | 116.7 | 7.4  |
|        | 5  | 196  | 134  | 1.46 | 0.03810 | 0.0176 | 0.10210 | 0.018  | 0.01950 | 0.004  |  |     | 0.20 |     |     |     | 124.3 | 4.9  |

|          |    |     |     |      |         |        |         |        |         |         |      |       |      |
|----------|----|-----|-----|------|---------|--------|---------|--------|---------|---------|------|-------|------|
| 09XC01   | 6  | 171 | 114 | 1.50 | 0.06490 | 0.0133 | 0.15890 | 0.014  | 0.01780 | 0.0041  | 0.30 | 113.6 | 4.6  |
|          | 7  | 134 | 130 | 1.03 | 0.03080 | 0.0876 | 0.07370 | 0.0877 | 0.01740 | 0.004   | 0.00 | 111   | 4.4  |
|          | 8  | 143 | 132 | 1.08 | 0.04620 | 0.0148 | 0.11390 | 0.0153 | 0.01790 | 0.004   | 0.30 | 114.2 | 4.5  |
|          | 9  | 95  | 105 | 0.90 | 0.04600 | 0.0141 | 0.11710 | 0.0147 | 0.01840 | 0.004   | 0.30 | 117.8 | 4.6  |
|          | 10 | 137 | 107 | 1.28 | 0.03130 | 0.03   | 0.07590 | 0.0303 | 0.01760 | 0.0041  | 0.10 | 112.2 | 4.5  |
|          | 11 | 119 | 138 | 0.86 | 0.03040 | 0.0261 | 0.07480 | 0.0264 | 0.01790 | 0.004   | 0.20 | 114.2 | 4.5  |
|          | 12 | 132 | 147 | 0.90 | 0.06040 | 0.0113 | 0.14720 | 0.012  | 0.01770 | 0.004   | 0.30 | 112.9 | 4.4  |
|          | 13 | 216 | 152 | 1.42 | 0.05630 | 0.0101 | 0.13860 | 0.0116 | 0.01790 | 0.0056  | 0.50 | 114.1 | 6.4  |
|          | 14 | 172 | 199 | 0.86 | 0.04690 | 0.0146 | 0.11860 | 0.0151 | 0.01840 | 0.0039  | 0.30 | 117.3 | 4.6  |
|          | 15 | 121 | 99  | 1.22 | 0.43410 | 0.0588 | 1.83900 | 0.0676 | 0.03070 | 0.0333  | 0.50 | 195.1 | 64.0 |
|          | 16 | 337 | 369 | 0.91 | 0.04770 | 0.015  | 0.10990 | 0.0155 | 0.01670 | 0.0039  | 0.30 | 106.8 | 4.2  |
|          | 17 | 233 | 297 | 0.78 | 0.05490 | 0.0057 | 0.15680 | 0.0069 | 0.02070 | 0.0039  | 0.60 | 132.2 | 5.1  |
|          | 18 | 226 | 154 | 1.47 | 0.03930 | 0.0082 | 0.10320 | 0.0091 | 0.01900 | 0.0039  | 0.40 | 121.5 | 4.7  |
|          | 19 | 203 | 281 | 0.72 | 0.02530 | 0.0236 | 0.07370 | 0.0239 | 0.02110 | 0.0039  | 0.20 | 134.7 | 5.2  |
|          | 20 | 285 | 199 | 1.43 | 0.05740 | 0.0092 | 0.14110 | 0.01   | 0.01780 | 0.0039  | 0.40 | 114   | 4.4  |
|          | 21 | 113 | 117 | 0.97 | 0.02280 | 0.047  | 0.05410 | 0.0472 | 0.01720 | 0.0041  | 0.10 | 110   | 4.5  |
|          | 22 | 171 | 165 | 1.04 | 0.06100 | 0.0103 | 0.15680 | 0.011  | 0.01870 | 0.0039  | 0.40 | 119.1 | 4.6  |
|          | 23 | 166 | 162 | 1.02 | 0.03280 | 0.0219 | 0.08160 | 0.0223 | 0.01800 | 0.004   | 0.20 | 115.3 | 4.6  |
|          | 24 | 168 | 134 | 1.25 | 0.02480 | 0.0428 | 0.05970 | 0.043  | 0.01740 | 0.0041  | 0.10 | 111.4 | 4.5  |
|          | 25 | 41  | 82  | 0.50 | 0.05530 | 0.013  | 0.13700 | 0.0136 | 0.01800 | 0.004   | 0.30 | 114.8 | 4.6  |
|          | 26 | 112 | 97  | 1.15 | 0.04520 | 0.061  | 0.11520 | 0.0611 | 0.01850 | 0.0039  | 0.10 | 118   | 4.6  |
|          | 27 | 157 | 152 | 1.03 | 0.02890 | 0.029  | 0.07200 | 0.0293 | 0.01810 | 0.004   | 0.10 | 115.7 | 4.6  |
|          | 28 | 200 | 144 | 1.39 | 0.07910 | 0.0118 | 0.23000 | 0.0125 | 0.02110 | 0.0041  | 0.30 | 134.5 | 5.5  |
|          | 29 | 224 | 169 | 1.33 | 0.04150 | 0.0097 | 0.10460 | 0.0105 | 0.01830 | 0.0039  | 0.40 | 116.7 | 4.5  |
|          | 30 | 90  | 100 | 0.90 | 0.02320 | 0.047  | 0.06520 | 0.0472 | 0.02040 | 0.0041  | 0.10 | 130.3 | 5.3  |
|          | 31 | 143 | 140 | 1.02 | 0.03650 | 0.0201 | 0.09480 | 0.0205 | 0.01880 | 0.004   | 0.20 | 120.4 | 4.7  |
|          | 32 | 129 | 140 | 0.92 | 0.04130 | 0.0432 | 0.10560 | 0.0441 | 0.01850 | 0.0087  | 0.20 | 118.3 | 10.2 |
|          | 33 | 134 | 132 | 1.02 | 0.05980 | 0.0124 | 0.15230 | 0.013  | 0.01850 | 0.004   | 0.30 | 118   | 4.7  |
|          | 34 | 479 | 279 | 1.72 | 0.04910 | 0.0058 | 0.12970 | 0.0069 | 0.01920 | 0.0039  | 0.60 | 122.4 | 4.7  |
|          | 35 | 108 | 104 | 1.04 | 0.03690 | 0.0306 | 0.09570 | 0.0308 | 0.01880 | 0.0041  | 0.10 | 120.1 | 4.9  |
|          | 36 | 342 | 206 | 1.66 | 0.03620 | 0.0151 | 0.10220 | 0.0156 | 0.02050 | 0.004   | 0.30 | 130.7 | 5.1  |
|          | 37 | 165 | 151 | 1.09 | 0.04570 | 0.0359 | 0.11640 | 0.0361 | 0.01850 | 0.0039  | 0.10 | 118.1 | 4.6  |
|          | 38 | 117 | 96  | 1.22 | 0.04000 | 0.0216 | 0.10330 | 0.022  | 0.01870 | 0.004   | 0.20 | 119.6 | 4.8  |
|          | 39 | 324 | 405 | 0.80 | 0.05070 | 0.0032 | 0.25080 | 0.005  | 0.03590 | 0.0038  | 0.80 | 227.1 | 8.6  |
| 2R<br>2c | 1  | 113 | 93  | 1.22 | 0.07210 | 0.0135 | 0.18370 | 0.0141 | 0.01850 | 0.004   | 0.30 | 117.9 | 4.7  |
|          |    | 208 | 200 | 1.04 | 0.05330 | 0.0088 | 0.14620 | 0.0096 | 0.01990 | 0.0039  | 0.40 | 126.9 | 4.9  |
|          |    | 178 | 152 | 1.17 | 0.06050 | 0.0075 | 0.17650 | 0.0085 | 0.02120 | 0.0039  | 0.50 | 134.9 | 5.3  |
|          | 3  | 211 | 189 | 1.12 | 0.04810 | 0.0096 | 0.12330 | 0.0104 | 0.01860 | 0.0039  | 0.40 | 118.8 | 4.6  |
|          | 4  | 288 | 197 | 1.46 | 0.04150 | 0.0122 | 0.10790 | 0.0128 | 0.01880 | 0.0039  | 0.30 | 120.3 | 4.7  |
|          | 5  | 249 | 197 | 1.26 | 0.05580 | 0.0107 | 0.14690 | 0.012  | 0.01910 | 0.0055  | 0.50 | 121.9 | 6.7  |
|          | 6  | 194 | 160 | 1.21 | 0.04410 | 0.011  | 0.11410 | 0.0117 | 0.01880 | 0.0039  | 0.30 | 119.9 | 4.6  |
|          | 7  | 190 | 206 | 0.92 | 0.05310 | 0.0057 | 0.14700 | 0.0069 | 0.02010 | 0.0039  | 0.60 | 128.3 | 4.9  |
|          | 8  | 284 | 223 | 1.27 | 0.04450 | 0.008  | 0.11170 | 0.0111 | 0.01820 | 0.0078  | 0.70 | 116.2 | 8.9  |
|          | 9  | 136 | 136 | 1.00 | 0.00480 | 0.2809 | 0.01180 | 0.2809 | 0.01780 | 0.0042  | 0.00 | 114   | 4.7  |
|          | 10 | 289 | 207 | 1.40 | 0.04350 | 0.016  | 0.11090 | 0.0165 | 0.01850 | 0.004   | 0.20 | 118.1 | 4.6  |
|          | 11 | N/A | N/A | N/A  | N/A     | N/A    | N/A     | N/A    | N/A     | N/A     | N/A  | N/A   | N/A  |
|          | 12 | N/A | N/A | N/A  | N/A     | N/A    | N/A     | N/A    | N/A     | N/A     | N/A  | N/A   | N/A  |
|          | 13 | 261 | 239 | 1.09 | 0.04340 | 0.011  | 0.12570 | 0.0116 | 0.02100 | 0.0039  | 0.30 | 134.1 | 5.2  |
|          | 14 | 254 | 304 | 0.84 | 0.04280 | 0.0255 | 0.10860 | 0.0258 | 0.01840 | 0.0039  | 0.20 | 117.6 | 4.5  |
|          | 15 | 192 | 154 | 1.25 | 0.05260 | 0.0379 | 0.13500 | 0.0381 | 0.01860 | 0.0039  | 0.10 | 118.9 | 4.6  |
|          | 16 | 100 | 99  | 1.01 | 0.05080 | 0.0077 | 0.15220 | 0.0087 | 0.02170 | 0.0039  | 0.50 | 138.5 | 5.4  |
|          | 17 | 151 | 139 | 1.09 | 0.03180 | 0.0243 | 0.08160 | 0.0246 | 0.01860 | 0.004   | 0.20 | 118.7 | 4.7  |
|          | 18 | 175 | 164 | 1.07 | 0.03900 | 0.0443 | 0.09930 | 0.0445 | 0.01850 | 0.004   | 0.10 | 118   | 4.7  |
|          | 19 | 153 | 159 | 0.96 | 0.05760 | 0.0075 | 0.15500 | 0.0085 | 0.01950 | 0.0039  | 0.50 | 124.6 | 4.8  |
|          | 20 | 77  | 95  | 0.81 | 0.02950 | 0.0347 | 0.07160 | 0.035  | 0.01760 | 0.0042  | 0.10 | 112.6 | 4.7  |
|          | 21 | 153 | 182 | 0.84 | 0.04220 | 0.0346 | 0.11130 | 0.0348 | 0.01910 | 0.0042  | 0.10 | 122.2 | 5.1  |
|          | 22 | 164 | 153 | 1.07 | 0.03830 | 0.0203 | 0.10900 | 0.0207 | 0.02070 | 0.004   | 0.20 | 131.8 | 5.2  |
|          | 23 | 157 | 153 | 1.03 | 0.03340 | 0.0258 | 0.08430 | 0.0261 | 0.01830 | 0.004   | 0.20 | 117   | 4.6  |
|          | 24 | 172 | 163 | 1.06 | 0.02900 | 0.0312 | 0.07400 | 0.0322 | 0.01850 | 0.0079  | 0.20 | 118.1 | 9.3  |
|          | 25 | 89  | 99  | 0.90 | 0.04520 | 0.0417 | 0.11520 | 0.0423 | 0.01850 | 0.0068  | 0.20 | 118   | 8.0  |
|          | 26 | 250 | 176 | 1.42 | 0.05600 | 0.0048 | 0.14600 | 0.0062 | 0.01890 | 0.0039  | 0.60 | 120.8 | 4.6  |
|          | 27 | 215 | 183 | 1.17 | 0.04580 | 0.0349 | 0.11920 | 0.0351 | 0.01890 | 0.0039  | 0.10 | 120.5 | 4.7  |
|          | 28 | 162 | 145 | 1.12 | 0.03730 | 0.019  | 0.09500 | 0.0194 | 0.01850 | 0.004   | 0.20 | 118   | 4.6  |
|          | 29 | 178 | 168 | 1.06 | 0.05140 | 0.0148 | 0.13330 | 0.0153 | 0.01880 | 0.004   | 0.30 | 120.3 | 4.7  |
|          | 30 | 188 | 169 | 1.11 | 0.02960 | 0.0256 | 0.07350 | 0.0259 | 0.01800 | 0.00003 | 0.20 | 114.9 | 4.5  |

M5, Dongyang (Li JH et al., 2014)

|           |     |     |      |        |     |        |     |         |     |      |     |       |     |
|-----------|-----|-----|------|--------|-----|--------|-----|---------|-----|------|-----|-------|-----|
| zj31-1.1  | 855 | 967 | 0.91 | 0.0449 | 5.1 | 0.1347 | 5.2 | 0.02175 | 1.1 | -60  | 120 | 138.7 | 1.5 |
| zj31-1.2  | 370 | 574 | 0.67 | 0.0506 | 3.4 | 0.1477 | 3.6 | 0.02118 | 1.1 | 221  | 79  | 135.1 | 1.5 |
| zj31-1.3  | 210 | 216 | 1.01 | 0.054  | 12  | 0.157  | 12  | 0.02104 | 1.6 | 372  | 270 | 134.2 | 2.1 |
| zj31-1.4  | 247 | 273 | 0.93 | 0.0424 | 17  | 0.122  | 17  | 0.02095 | 1.6 | -203 | 420 | 133.7 | 2.1 |
| zj31-1.5  | 243 | 475 | 0.53 | 0.0403 | 9.6 | 0.117  | 9.6 | 0.0211  | 1.2 | -333 | 250 | 134.6 | 1.7 |
| zj31-1.6  | 309 | 508 | 0.63 | 0.0449 | 11  | 0.129  | 11  | 0.02083 | 1.3 | -59  | 280 | 132.9 | 1.7 |
| zj31-1.7  | 459 | 676 | 0.7  | 0.0471 | 8   | 0.138  | 8.1 | 0.02122 | 1.2 | 56   | 190 | 135.4 | 1.6 |
| zj31-1.8  | 336 | 469 | 0.74 | 0.0481 | 8.3 | 0.142  | 8.4 | 0.02143 | 1.3 | 103  | 200 | 136.7 | 1.7 |
| zj31-1.9  | 252 | 518 | 0.5  | 0.0466 | 15  | 0.14   | 15  | 0.02185 | 1.4 | 27   | 350 | 139.3 | 1.9 |
| zj31-1.10 | 556 | 348 | 1.65 | 0.0457 | 8.1 | 0.224  | 8.2 | 0.0356  | 1.2 | 148  | 200 | 225.5 | 2.8 |
| zj31-1.11 | 156 | 217 | 0.74 | 0.0532 | 12  | 0.155  | 12  | 0.02114 | 1.6 | 339  | 270 | 134.9 | 2.2 |
| zj31-1.12 | 248 | 309 | 0.83 | 0.0454 | 16  | 0.135  | 16  | 0.0216  | 1.5 | -36  | 390 | 137.8 | 2.1 |
| zj31-1.13 | 235 | 288 | 0.84 | 0.0495 | 10  | 0.143  | 10  | 0.02097 | 1.5 | 169  | 240 | 133.8 | 1.9 |
| zj31-1.14 | 214 | 284 | 0.78 | 0.0402 | 21  | 0.118  | 21  | 0.02126 | 1.5 | -340 | 550 | 135.6 | 2.1 |

M6, Yucaotou, Yiwu (Liu et al., 2012; Li CH et al., 2014)

|         |     |     |      |         |         |         |         |         |         |         |         |     |    |     |   |     |     |     |   |     |
|---------|-----|-----|------|---------|---------|---------|---------|---------|---------|---------|---------|-----|----|-----|---|-----|-----|-----|---|-----|
| DS01-01 | 327 | 346 | 0.95 | 0.04876 | 0.00127 | 0.15072 | 0.00400 | 0.02242 | 0.00032 | 0.00629 | 0.00028 | 136 | 63 | 143 | 4 | 143 | 2.0 | 127 | 6 | 1.0 |
|---------|-----|-----|------|---------|---------|---------|---------|---------|---------|---------|---------|-----|----|-----|---|-----|-----|-----|---|-----|

|         |      |     |      |         |         |         |         |         |         |         |         |      |     |      |    |      |      |      |     |     |
|---------|------|-----|------|---------|---------|---------|---------|---------|---------|---------|---------|------|-----|------|----|------|------|------|-----|-----|
| DS01-02 | 357  | 358 | 1.00 | 0.05047 | 0.00144 | 0.15089 | 0.00433 | 0.02169 | 0.00031 | 0.00650 | 0.00033 | 217  | 68  | 143  | 4  | 138  | 2.0  | 131  | 7   | 1.0 |
| DS01-03 | 548  | 556 | 0.99 | 0.05023 | 0.00099 | 0.15030 | 0.00302 | 0.02170 | 0.00027 | 0.00712 | 0.00036 | 206  | 47  | 142  | 3  | 138  | 2.0  | 143  | 7   | 1.0 |
| DS01-04 | 1391 | 998 | 1.39 | 0.05065 | 0.00117 | 0.14950 | 0.00361 | 0.02141 | 0.00032 | 0.00581 | 0.00037 | 225  | 55  | 141  | 3  | 137  | 2.0  | 117  | 7   | 1.0 |
| DS01-05 | 340  | 361 | 0.94 | 0.04891 | 0.00157 | 0.14956 | 0.00477 | 0.02218 | 0.00032 | 0.00738 | 0.00052 | 144  | 76  | 142  | 4  | 141  | 2.0  | 149  | 10  | 1.0 |
| DS01-06 | 289  | 473 | 0.61 | 0.04982 | 0.00084 | 0.19491 | 0.00346 | 0.02838 | 0.00036 | 0.00860 | 0.00042 | 187  | 40  | 181  | 3  | 180  | 2.0  | 173  | 8   | 1.0 |
| DS01-07 | 380  | 389 | 0.97 | 0.04919 | 0.00209 | 0.14989 | 0.00616 | 0.02210 | 0.00035 | 0.00730 | 0.00100 | 157  | 99  | 142  | 5  | 141  | 2.0  | 147  | 20  | 1.0 |
| DS01-08 | 568  | 658 | 0.86 | 0.04890 | 0.00090 | 0.14786 | 0.00281 | 0.02193 | 0.00028 | 0.00732 | 0.00047 | 143  | 44  | 140  | 2  | 140  | 2.0  | 147  | 9   | 1.0 |
| DS01-09 | 236  | 268 | 0.88 | 0.04968 | 0.00141 | 0.15201 | 0.00436 | 0.02220 | 0.00031 | 0.00693 | 0.00045 | 180  | 68  | 144  | 4  | 142  | 2.0  | 140  | 9   | 1.0 |
| DS01-10 | 96   | 136 | 0.70 | 0.04725 | 0.00551 | 0.14583 | 0.01653 | 0.02239 | 0.00066 | 0.00675 | 0.00137 | 62   | 236 | 138  | 15 | 143  | 4.0  | 136  | 28  | 1.0 |
| DS01-11 | 214  | 221 | 0.97 | 0.05111 | 0.00229 | 0.15451 | 0.00680 | 0.02192 | 0.00035 | 0.00718 | 0.00055 | 246  | 105 | 146  | 6  | 140  | 2.0  | 145  | 11  | 1.0 |
| DS01-12 | 753  | 694 | 1.08 | 0.04822 | 0.00104 | 0.14772 | 0.00316 | 0.02222 | 0.00027 | 0.00736 | 0.00057 | 110  | 52  | 140  | 3  | 142  | 2.0  | 148  | 11  | 1.0 |
| DS01-13 | 376  | 601 | 0.63 | 0.04823 | 0.00248 | 0.14676 | 0.00739 | 0.02207 | 0.00043 | 0.00685 | 0.00097 | 111  | 116 | 139  | 7  | 141  | 3.0  | 138  | 19  | 1.0 |
| DS01-14 | 250  | 304 | 0.82 | 0.04918 | 0.00426 | 0.14830 | 0.01250 | 0.02191 | 0.00061 | 0.00413 | 0.00085 | 156  | 196 | 140  | 11 | 140  | 4.0  | 83   | 17  | 1.0 |
| DS01-15 | 543  | 439 | 1.24 | 0.04910 | 0.00109 | 0.14949 | 0.00334 | 0.02208 | 0.00028 | 0.00718 | 0.00048 | 153  | 53  | 141  | 3  | 141  | 2.0  | 145  | 10  | 1.0 |
| DS01-16 | 295  | 198 | 1.49 | 0.04924 | 0.00235 | 0.15001 | 0.00711 | 0.02210 | 0.00038 | 0.00734 | 0.00064 | 159  | 110 | 142  | 6  | 141  | 2.0  | 148  | 13  | 1.0 |
| DS01-17 | 248  | 282 | 0.88 | 0.04992 | 0.00130 | 0.15078 | 0.00397 | 0.02190 | 0.00029 | 0.00724 | 0.00048 | 191  | 62  | 143  | 4  | 140  | 2.0  | 146  | 10  | 1.0 |
| DS01-18 | 311  | 306 | 1.02 | 0.05012 | 0.00154 | 0.15141 | 0.00469 | 0.02191 | 0.00033 | 0.00703 | 0.00058 | 201  | 73  | 143  | 4  | 140  | 2.0  | 142  | 12  | 1.0 |
| DS01-19 | 480  | 187 | 2.56 | 0.05065 | 0.00337 | 0.15040 | 0.00986 | 0.02155 | 0.00046 | 0.00625 | 0.00089 | 225  | 153 | 142  | 9  | 137  | 3.0  | 126  | 18  | 1.0 |
| DS01-21 | 36   | 648 | 0.06 | 0.11225 | 0.00144 | 3.72506 | 0.05160 | 0.24069 | 0.00286 | 0.07497 | 0.00572 | 1836 | 24  | 1577 | 11 | 1390 | 15.0 | 1461 | 108 | 0.9 |
|         |      |     |      |         |         |         |         |         |         |         |         |      |     |      |    |      |      |      |     |     |
| DS02-01 | 238  | 108 | 2.20 | 0.04943 | 0.00345 | 0.14554 | 0.01004 | 0.02135 | 0.00040 | 0.00661 | 0.00042 | 168  | 159 | 138  | 9  | 136  | 3.0  | 133  | 8   | 1.0 |
| DS02-02 | 207  | 149 | 1.39 | 0.04971 | 0.00220 | 0.14612 | 0.00645 | 0.02132 | 0.00032 | 0.00633 | 0.00036 | 181  | 103 | 138  | 6  | 136  | 2.0  | 128  | 7   | 1.0 |
| DS02-03 | 164  | 97  | 1.70 | 0.04891 | 0.00324 | 0.14611 | 0.00961 | 0.02167 | 0.00037 | 0.00674 | 0.00040 | 144  | 150 | 138  | 9  | 138  | 2.0  | 136  | 8   | 1.0 |
| DS02-04 | 166  | 152 | 1.09 | 0.04935 | 0.00288 | 0.15181 | 0.00868 | 0.02231 | 0.00038 | 0.00716 | 0.00071 | 164  | 133 | 144  | 8  | 142  | 2.0  | 144  | 14  | 1.0 |
| DS02-05 | 177  | 114 | 1.55 | 0.05010 | 0.00311 | 0.15325 | 0.00940 | 0.02219 | 0.00039 | 0.00672 | 0.00046 | 200  | 142 | 145  | 8  | 141  | 2.0  | 135  | 9   | 1.0 |
| DS02-06 | 695  | 466 | 1.49 | 0.04975 | 0.00100 | 0.14874 | 0.00312 | 0.02169 | 0.00028 | 0.00626 | 0.00036 | 183  | 48  | 141  | 3  | 138  | 2.0  | 126  | 7   | 1.0 |
| DS02-07 | 293  | 142 | 2.06 | 0.04899 | 0.00193 | 0.14739 | 0.00579 | 0.02182 | 0.00031 | 0.00620 | 0.00037 | 147  | 92  | 140  | 5  | 139  | 2.0  | 125  | 7   | 1.0 |
| DS02-08 | 300  | 186 | 1.62 | 0.04762 | 0.00211 | 0.14367 | 0.00625 | 0.02188 | 0.00033 | 0.00652 | 0.00060 | 80   | 99  | 136  | 6  | 140  | 2.0  | 131  | 12  | 1.0 |
| DS02-09 | 256  | 195 | 1.32 | 0.04996 | 0.00199 | 0.14919 | 0.00593 | 0.02166 | 0.00033 | 0.00610 | 0.00044 | 193  | 95  | 141  | 5  | 138  | 2.0  | 123  | 9   | 1.0 |
| DS02-10 | 116  | 83  | 1.40 | 0.04887 | 0.00491 | 0.14508 | 0.01432 | 0.02154 | 0.00049 | 0.00690 | 0.00094 | 142  | 225 | 138  | 13 | 137  | 3.0  | 139  | 19  | 1.0 |
| DS02-11 | 182  | 158 | 1.15 | 0.04749 | 0.00215 | 0.14325 | 0.00639 | 0.02188 | 0.00031 | 0.00679 | 0.00048 | 74   | 100 | 136  | 6  | 140  | 2.0  | 137  | 10  | 1.0 |
| DS02-12 | 147  | 98  | 1.49 | 0.05117 | 0.00277 | 0.14642 | 0.00787 | 0.02075 | 0.00031 | 0.00605 | 0.00030 | 248  | 126 | 139  | 7  | 132  | 2.0  | 122  | 6   | 0.9 |
| DS02-13 | 230  | 158 | 1.46 | 0.04805 | 0.00349 | 0.14590 | 0.01036 | 0.02205 | 0.00044 | 0.00697 | 0.00083 | 102  | 163 | 138  | 9  | 141  | 3.0  | 140  | 17  | 1.0 |
| DS02-15 | 456  | 297 | 1.54 | 0.05091 | 0.00319 | 0.14996 | 0.00922 | 0.02137 | 0.00046 | 0.00510 | 0.00050 | 237  | 145 | 142  | 8  | 136  | 3.0  | 103  | 10  | 1.0 |
| DS02-16 | 124  | 87  | 1.43 | 0.05031 | 0.00818 | 0.14995 | 0.02396 | 0.02161 | 0.00075 | 0.00587 | 0.00073 | 209  | 326 | 142  | 21 | 138  | 5.0  | 118  | 15  | 1.0 |
| DS02-17 | 225  | 160 | 1.40 | 0.04969 | 0.00424 | 0.14571 | 0.01223 | 0.02126 | 0.00050 | 0.00535 | 0.00052 | 181  | 194 | 138  | 11 | 136  | 3.0  | 108  | 10  | 1.0 |
| DS02-18 | 127  | 70  | 1.82 | 0.05004 | 0.00517 | 0.14704 | 0.01497 | 0.02133 | 0.00046 | 0.00704 | 0.00081 | 197  | 232 | 139  | 13 | 136  | 3.0  | 142  | 16  | 1.0 |
| DS02-19 | 192  | 94  | 2.04 | 0.05034 | 0.00360 | 0.14745 | 0.01037 | 0.02124 | 0.00038 | 0.00713 | 0.00069 | 211  | 164 | 140  | 9  | 135  | 2.0  | 144  | 14  | 1.0 |
| DS02-21 | 158  | 108 | 1.47 | 0.04837 | 0.00562 | 0.14610 | 0.01670 | 0.02190 | 0.00059 | 0.00521 | 0.00062 | 117  | 245 | 138  | 15 | 140  | 4.0  | 105  | 12  | 1.0 |
| DS02-23 | 196  | 151 | 1.30 | 0.04947 | 0.00235 | 0.14483 | 0.00675 | 0.02123 | 0.00032 | 0.00666 | 0.00073 | 170  | 110 | 137  | 6  | 135  | 2.0  | 134  | 15  | 1.0 |
|         |      |     |      |         |         |         |         |         |         |         |         |      |     |      |    |      |      |      |     |     |
| DS03-01 | 379  | 409 | 0.93 | 0.04979 | 0.00099 | 0.14262 | 0.00294 | 0.02078 | 0.00026 | 0.00620 | 0.00030 | 185  | 47  | 135  | 3  | 133  | 2.0  | 125  | 6   | 1.0 |
| DS03-02 | 396  | 377 | 1.05 | 0.05180 | 0.00119 | 0.15317 | 0.00359 | 0.02145 | 0.00028 | 0.00719 | 0.00041 | 277  | 54  | 145  | 3  | 137  | 2.0  | 145  | 8   | 0.9 |
| DS03-04 | 412  | 376 | 1.09 | 0.05239 | 0.00164 | 0.15732 | 0.00496 | 0.02178 | 0.00034 | 0.00489 | 0.00032 | 302  | 73  | 148  | 4  | 139  | 2.0  | 99   | 6   | 0.9 |
| DS03-05 | 267  | 329 | 0.81 | 0.05279 | 0.00267 | 0.15565 | 0.00774 | 0.02140 | 0.00041 | 0.00498 | 0.00056 | 320  | 118 | 147  | 7  | 136  | 3.0  | 100  | 11  | 0.9 |
| DS03-06 | 113  | 150 | 0.76 | 0.04928 | 0.00244 | 0.14799 | 0.00720 | 0.02178 | 0.00034 | 0.00617 | 0.00053 | 161  | 114 | 140  | 6  | 139  | 2.0  | 124  | 11  | 1.0 |
| DS03-07 | 2080 | 811 | 2.56 | 0.05074 | 0.00101 | 0.14727 | 0.00307 | 0.02106 | 0.00029 | 0.00495 | 0.00031 | 229  | 47  | 139  | 3  | 134  | 2.0  | 100  | 6   | 1.0 |
| DS03-08 | 131  | 153 | 0.85 | 0.04726 | 0.00207 | 0.13893 | 0.00604 | 0.02132 | 0.00031 | 0.00618 | 0.00047 | 62   | 96  | 132  | 5  | 136  | 2.0  | 125  | 9   | 1.0 |
| DS03-09 | 473  | 523 | 0.90 | 0.04929 | 0.00158 | 0.14326 | 0.00460 | 0.02108 | 0.00033 | 0.00533 | 0.00055 | 162  | 76  | 136  | 4  | 134  | 2.0  | 1    |     |     |

|               |     |     |      |         |         |         |         |     |      |
|---------------|-----|-----|------|---------|---------|---------|---------|-----|------|
| DY11-23-4-3   | 51  | 19  | 2.67 | 0.15026 | 0.04658 | 0.02044 | 0.00096 | 130 | 6.1  |
| DY11-23-4-4   | 33  | 45  | 0.74 | 0.36902 | 0.03433 | 0.02131 | 0.00143 | 136 | 9.0  |
| DY11-23-4-5   | 35  | 26  | 1.33 | 0.15003 | 0.00646 | 0.02084 | 0.00160 | 133 | 10.1 |
| DY11-23-4-6   | 18  | 9   | 1.99 | 0.17879 | 0.07856 | 0.02542 | 0.00357 | 162 | 22.4 |
| DY11-23-4-7   | 74  | 35  | 2.10 | 0.27263 | 0.07477 | 0.02145 | 0.00172 | 137 | 10.8 |
| DY11-23-4-8   | 96  | 46  | 2.11 | 0.13974 | 0.01979 | 0.02156 | 0.00154 | 137 | 9.7  |
| DY11-23-4-9   | 17  | 17  | 0.97 | 0.15398 | 0.02913 | 0.02151 | 0.00221 | 137 | 14.0 |
| DY11-23-4-10  | 250 | 119 | 2.11 | 0.15944 | 0.03950 | 0.02191 | 0.00194 | 140 | 12.3 |
| DY11-23-4-11  | 67  | 21  | 3.22 | 0.30103 | 0.05334 | 0.02557 | 0.00189 | 163 | 11.9 |
| DY11-23-4-12  | 95  | 64  | 1.48 | 0.16453 | 0.01130 | 0.02174 | 0.00072 | 139 | 4.6  |
| DY11-23-4-13  | 48  | 51  | 0.94 | 0.19868 | 0.03085 | 0.02189 | 0.00025 | 140 | 1.6  |
| DY11-23-4-14  | 24  | 16  | 1.51 | 0.15347 | 0.01756 | 0.02136 | 0.00162 | 136 | 10.2 |
| DY11-23-4-15  | 15  | 10  | 1.50 | 0.13512 | 0.04989 | 0.02191 | 0.00464 | 140 | 29.3 |
| DY11-23-4-16  | 63  | 55  | 1.14 | 0.31033 | 0.06960 | 0.03198 | 0.00203 | 203 | 12.7 |
| DY11-23-4-17  | 110 | 71  | 1.55 | 0.31608 | 0.03573 | 0.02423 | 0.00094 | 154 | 5.9  |
| DY11-23-4-18  | 23  | 6   | 3.90 | 0.71229 | 0.14376 | 0.03089 | 0.00079 | 196 | 4.9  |
| DY11-23-4-19  | 25  | 11  | 2.17 | 0.15695 | 0.05162 | 0.02011 | 0.00244 | 128 | 15.4 |
| DY11-23-4-20  | 31  | 21  | 1.47 | 0.16106 | 0.01797 | 0.02187 | 0.00078 | 139 | 4.9  |
| DY11-24-6-1   | 77  | 52  | 1.47 | 0.16366 | 0.00917 | 0.02210 | 0.00066 | 141 | 4.1  |
| DY11-24-6-2   | 60  | 66  | 0.91 | 0.16539 | 0.01253 | 0.02245 | 0.00057 | 143 | 3.6  |
| DY11-24-6-3   | 184 | 92  | 2.01 | 0.16109 | 0.01666 | 0.02200 | 0.00047 | 140 | 2.9  |
| DY11-24-6-4   | 112 | 68  | 1.64 | 0.30837 | 0.01712 | 0.02203 | 0.00086 | 140 | 5.4  |
| DY11-24-6-5   | 65  | 46  | 1.43 | 0.15261 | 0.02034 | 0.02210 | 0.00126 | 141 | 7.9  |
| DY11-24-6-6   | 194 | 118 | 1.65 | 0.21250 | 0.00085 | 0.02520 | 0.00053 | 160 | 3.3  |
| DY11-24-6-7   | 97  | 97  | 1.00 | 0.18072 | 0.02158 | 0.02264 | 0.00119 | 144 | 7.5  |
| DY11-24-6-8   | 80  | 60  | 1.35 | 0.14109 | 0.00905 | 0.02184 | 0.00040 | 139 | 2.5  |
| DY11-24-6-9   | 42  | 31  | 1.35 | 0.18810 | 0.04637 | 0.02091 | 0.00056 | 133 | 3.6  |
| DY11-24-6-10  | 506 | 271 | 1.87 | 0.22312 | 0.00155 | 0.02091 | 0.00112 | 133 | 7.1  |
| DY11-24-6-11  | 105 | 56  | 1.87 | 0.46882 | 0.03667 | 0.02201 | 0.00115 | 140 | 7.3  |
| DY11-24-6-12  | 281 | 214 | 1.31 | 0.16829 | 0.01008 | 0.02258 | 0.00139 | 144 | 8.8  |
| DY11-24-6-13  | 191 | 139 | 1.37 | 0.14433 | 0.00943 | 0.02196 | 0.00080 | 140 | 5.0  |
| DY11-24-6-14  | 63  | 49  | 1.28 | 0.44481 | 0.01788 | 0.02185 | 0.00059 | 139 | 3.7  |
| DY11-24-6-15  | 813 | 310 | 2.62 | 0.16018 | 0.00282 | 0.02188 | 0.00029 | 140 | 1.8  |
| DY11-24-6-16  | 95  | 66  | 1.44 | 0.14778 | 0.01057 | 0.02196 | 0.00038 | 140 | 2.4  |
| DY11-24-6-17  | 73  | 51  | 1.44 | 0.16882 | 0.00303 | 0.02244 | 0.00060 | 143 | 3.8  |
| DY11-24-6-18  | 111 | 73  | 1.53 | 0.14944 | 0.00921 | 0.02202 | 0.00079 | 140 | 5.0  |
| DY11-24-6-19  | 117 | 62  | 1.88 | 0.23985 | 0.02778 | 0.02341 | 0.00140 | 149 | 8.8  |
| DY11-24-6-20  | 135 | 95  | 1.43 | 0.19803 | 0.00548 | 0.02112 | 0.00033 | 135 | 2.1  |
| DY11-146-1-1  | 177 | 232 | 0.76 | 0.16355 | 0.00346 | 0.02258 | 0.00056 | 144 | 3.5  |
| DY11-146-1-2  | 116 | 148 | 0.78 | 0.16093 | 0.00301 | 0.02271 | 0.00027 | 145 | 1.7  |
| DY11-146-1-3  | 85  | 65  | 1.32 | 0.21898 | 0.00597 | 0.02251 | 0.00034 | 144 | 2.1  |
| DY11-146-1-4  | 63  | 61  | 1.04 | 0.16843 | 0.00610 | 0.02326 | 0.00055 | 148 | 3.5  |
| DY11-146-1-5  | 115 | 81  | 1.42 | 0.17692 | 0.01163 | 0.02270 | 0.00088 | 145 | 5.6  |
| DY11-146-1-6  | 431 | 197 | 2.19 | 0.14902 | 0.00551 | 0.02262 | 0.00074 | 144 | 4.7  |
| DY11-146-1-7  | 44  | 50  | 0.89 | 0.15525 | 0.01271 | 0.02273 | 0.00030 | 145 | 1.9  |
| DY11-146-1-8  | 137 | 124 | 1.11 | 0.16427 | 0.01600 | 0.02248 | 0.00083 | 143 | 5.3  |
| DY11-146-1-9  | 60  | 36  | 1.65 | 0.15564 | 0.02378 | 0.02261 | 0.00132 | 144 | 8.3  |
| DY11-146-1-10 | 45  | 41  | 1.09 | 0.15696 | 0.00841 | 0.02285 | 0.00092 | 146 | 5.8  |
| DY11-146-1-11 | 147 | 92  | 1.59 | 0.27099 | 0.00838 | 0.02353 | 0.00068 | 150 | 4.3  |
| DY11-146-1-12 | 63  | 33  | 1.92 | 0.15659 | 0.00877 | 0.02279 | 0.00039 | 145 | 2.5  |
| DY11-146-1-13 | 31  | 21  | 1.47 | 0.20226 | 0.01580 | 0.02320 | 0.00098 | 148 | 6.2  |
| DY11-146-1-14 | 66  | 55  | 1.19 | 0.45648 | 0.00779 | 0.02372 | 0.00023 | 151 | 1.4  |
| DY11-146-1-15 | 213 | 163 | 1.30 | 0.18332 | 0.01441 | 0.02222 | 0.00043 | 142 | 2.7  |
| DY11-146-1-16 | 97  | 82  | 1.19 | 0.16665 | 0.00496 | 0.02248 | 0.00037 | 143 | 2.3  |
| DY11-146-1-17 | 119 | 73  | 1.64 | 0.14750 | 0.00730 | 0.02204 | 0.00069 | 141 | 4.4  |
| DY11-146-1-18 | 87  | 77  | 1.14 | 0.17268 | 0.01367 | 0.02385 | 0.00042 | 152 | 2.6  |
| DY11-146-1-19 | 377 | 177 | 2.13 | 0.15668 | 0.00405 | 0.02304 | 0.00065 | 147 | 4.1  |
| DY11-146-1-20 | 152 | 62  | 2.46 | 0.16601 | 0.00865 | 0.02247 | 0.00092 | 143 | 5.8  |
| DY11-152-1-1  | 146 | 85  | 1.72 | 0.15864 | 0.00588 | 0.02278 | 0.00028 | 145 | 1.8  |
| DY11-152-1-2  | 69  | 43  | 1.58 | 0.14990 | 0.01918 | 0.02231 | 0.00032 | 142 | 2.0  |
| DY11-152-1-3  | 44  | 31  | 1.40 | 0.15298 | 0.01900 | 0.02276 | 0.00115 | 145 | 7.2  |
| DY11-152-1-4  | 59  | 61  | 0.97 | 0.16791 | 0.00546 | 0.02238 | 0.00051 | 143 | 3.2  |
| DY11-152-1-5  | 19  | 23  | 0.84 | 0.26543 | 0.02514 | 0.02270 | 0.00083 | 145 | 5.2  |
| DY11-152-1-6  | 132 | 81  | 1.64 | 0.15274 | 0.00538 | 0.02209 | 0.00035 | 141 | 2.2  |
| DY11-152-1-7  | 22  | 20  | 1.06 | 0.14472 | 0.00682 | 0.02180 | 0.00050 | 139 | 3.1  |
| DY11-152-1-8  | 78  | 61  | 1.28 | 0.15198 | 0.00484 | 0.02230 | 0.00050 | 142 | 3.1  |
| DY11-152-1-9  | 124 | 83  | 1.49 | 0.14638 | 0.01110 | 0.02194 | 0.00092 | 140 | 5.8  |
| DY11-152-1-10 | 439 | 211 | 2.08 | 0.15563 | 0.00342 | 0.02224 | 0.00031 | 142 | 1.9  |
| DY11-152-1-11 | 140 | 69  | 2.03 | 0.15317 | 0.00324 | 0.02221 | 0.00024 | 142 | 1.5  |
| DY11-152-1-12 | 119 | 75  | 1.59 | 0.15387 | 0.01544 | 0.02242 | 0.00046 | 143 | 2.9  |
| DY11-152-1-13 | 93  | 63  | 1.48 | 0.15290 | 0.00411 | 0.02231 | 0.00037 | 142 | 2.3  |
| DY11-152-1-14 | 65  | 65  | 1.01 | 0.16716 | 0.01294 | 0.02221 | 0.00067 | 142 | 4.2  |
| DY11-152-1-15 | 103 | 88  | 1.18 | 0.15756 | 0.00301 | 0.02222 | 0.00028 | 142 | 1.7  |
| DY11-152-1-16 | 19  | 21  | 0.89 | 0.16131 | 0.00724 | 0.02205 | 0.00037 | 141 | 2.4  |
| DY11-152-1-17 | 188 | 114 | 1.65 | 0.19112 | 0.00430 | 0.02145 | 0.00037 | 137 | 2.3  |
| DY11-152-1-18 | 51  | 44  | 1.17 | 0.15770 | 0.00949 | 0.02196 | 0.00054 | 140 | 3.4  |
| DY11-152-1-19 | 31  | 50  | 0.63 | 0.19331 | 0.01536 | 0.02797 | 0.00059 | 178 | 3.7  |
| DY11-152-1-20 | 74  | 69  | 1.08 | 0.14682 | 0.00622 | 0.02224 | 0.00036 | 142 | 2.3  |

M7, Jiande Group in Pujiang (Liu et al., 2014)

|         |     |     |      |         |         |         |         |         |         |         |         |     |     |     |    |     |     |    |    |     |
|---------|-----|-----|------|---------|---------|---------|---------|---------|---------|---------|---------|-----|-----|-----|----|-----|-----|----|----|-----|
| LC04-01 | 219 | 138 | 1.58 | 0.04870 | 0.00675 | 0.14682 | 0.01977 | 0.02182 | 0.00084 | 0.00303 | 0.00034 | 133 | 278 | 139 | 18 | 139 | 5.0 | 61 | 7  | 1.0 |
| LC04-02 | 342 | 312 | 1.10 | 0.04852 | 0.00545 | 0.14181 | 0.01542 | 0.02121 | 0.00073 | 0.00366 | 0.00057 | 125 | 243 | 135 | 14 | 135 | 5.0 | 74 | 11 | 1.0 |

|         |     |     |      |         |         |         |         |         |         |         |         |     |     |     |    |     |     |     |    |     |
|---------|-----|-----|------|---------|---------|---------|---------|---------|---------|---------|---------|-----|-----|-----|----|-----|-----|-----|----|-----|
| LC04-03 | 416 | 227 | 1.83 | 0.04899 | 0.00455 | 0.14314 | 0.01293 | 0.02119 | 0.00060 | 0.00531 | 0.00072 | 147 | 211 | 136 | 11 | 135 | 4.0 | 107 | 14 | 1.0 |
| LC04-04 | 504 | 501 | 1.01 | 0.04778 | 0.00375 | 0.13903 | 0.01059 | 0.02112 | 0.00057 | 0.00403 | 0.00059 | 88  | 176 | 132 | 9  | 135 | 4.0 | 81  | 12 | 1.0 |
| LC04-05 | 225 | 216 | 1.04 | 0.04988 | 0.00521 | 0.14441 | 0.01460 | 0.02100 | 0.00066 | 0.00541 | 0.00112 | 189 | 234 | 137 | 13 | 134 | 4.0 | 109 | 23 | 1.0 |
| LC04-06 | 622 | 544 | 1.14 | 0.04872 | 0.00177 | 0.14236 | 0.00517 | 0.02119 | 0.00037 | 0.00548 | 0.00056 | 134 | 85  | 135 | 5  | 135 | 2.0 | 110 | 11 | 1.0 |
| LC04-07 | 157 | 178 | 0.88 | 0.04957 | 0.00335 | 0.14660 | 0.00970 | 0.02145 | 0.00048 | 0.00539 | 0.00059 | 175 | 154 | 139 | 9  | 137 | 3.0 | 109 | 12 | 1.0 |
| LC04-08 | 347 | 327 | 1.06 | 0.04862 | 0.00181 | 0.14108 | 0.00529 | 0.02105 | 0.00037 | 0.00441 | 0.00034 | 130 | 86  | 134 | 5  | 134 | 2.0 | 89  | 7  | 1.0 |
| LC04-09 | 375 | 284 | 1.32 | 0.05268 | 0.00326 | 0.15536 | 0.00939 | 0.02139 | 0.00048 | 0.00589 | 0.00092 | 315 | 144 | 147 | 8  | 136 | 3.0 | 119 | 18 | 0.9 |
| LC04-10 | 375 | 322 | 1.16 | 0.04857 | 0.00172 | 0.14457 | 0.00517 | 0.02159 | 0.00037 | 0.00429 | 0.00032 | 127 | 82  | 137 | 5  | 138 | 2.0 | 87  | 6  | 1.0 |
| LC04-11 | 755 | 731 | 1.03 | 0.04975 | 0.00099 | 0.14688 | 0.00319 | 0.02141 | 0.00033 | 0.00357 | 0.00015 | 183 | 47  | 139 | 3  | 137 | 2.0 | 72  | 3  | 1.0 |
| LC04-12 | 378 | 406 | 0.93 | 0.04846 | 0.00134 | 0.14226 | 0.00407 | 0.02129 | 0.00034 | 0.00464 | 0.00025 | 122 | 66  | 135 | 4  | 136 | 2.0 | 94  | 5  | 1.0 |
| LC04-13 | 133 | 82  | 1.62 | 0.04970 | 0.00372 | 0.14793 | 0.01096 | 0.02159 | 0.00044 | 0.00309 | 0.00015 | 181 | 170 | 140 | 10 | 138 | 3.0 | 62  | 3  | 1.0 |
| LC04-14 | 451 | 265 | 1.70 | 0.04868 | 0.00164 | 0.14458 | 0.00495 | 0.02154 | 0.00036 | 0.00386 | 0.00019 | 132 | 79  | 137 | 4  | 137 | 2.0 | 78  | 4  | 1.0 |
| LC04-15 | 308 | 226 | 1.36 | 0.04913 | 0.00395 | 0.14507 | 0.01133 | 0.02140 | 0.00059 | 0.00161 | 0.00012 | 154 | 182 | 138 | 10 | 136 | 4.0 | 33  | 2  | 1.0 |
| LC04-16 | 301 | 276 | 1.09 | 0.04904 | 0.00168 | 0.14312 | 0.00497 | 0.02117 | 0.00035 | 0.00376 | 0.00020 | 150 | 81  | 136 | 4  | 135 | 2.0 | 76  | 4  | 1.0 |
| LC04-17 | 340 | 307 | 1.11 | 0.04725 | 0.00156 | 0.13796 | 0.00464 | 0.02118 | 0.00035 | 0.00402 | 0.00022 | 62  | 73  | 131 | 4  | 135 | 2.0 | 81  | 4  | 1.0 |
| LC04-18 | 432 | 328 | 1.32 | 0.04799 | 0.00193 | 0.14008 | 0.00562 | 0.02117 | 0.00039 | 0.00359 | 0.00023 | 99  | 91  | 133 | 5  | 135 | 2.0 | 72  | 5  | 1.0 |
| LC04-19 | 256 | 137 | 1.87 | 0.04831 | 0.00408 | 0.14090 | 0.01155 | 0.02114 | 0.00060 | 0.00104 | 0.00006 | 114 | 190 | 134 | 10 | 135 | 4.0 | 21  | 1  | 1.0 |
| LC04-20 | 188 | 132 | 1.42 | 0.04890 | 0.00285 | 0.14346 | 0.00829 | 0.02128 | 0.00041 | 0.00421 | 0.00029 | 143 | 132 | 136 | 7  | 136 | 3.0 | 85  | 6  | 1.0 |
| LC04-21 | 160 | 124 | 1.29 | 0.04775 | 0.00522 | 0.13849 | 0.01458 | 0.02104 | 0.00075 | 0.00061 | 0.00005 | 87  | 230 | 132 | 13 | 134 | 5.0 | 12  | 1  | 1.0 |
| LC04-22 | 97  | 61  | 1.60 | 0.04634 | 0.00493 | 0.13716 | 0.01444 | 0.02147 | 0.00052 | 0.00214 | 0.00013 | 15  | 219 | 131 | 13 | 137 | 3.0 | 43  | 3  | 1.0 |
| LC04-23 | 262 | 239 | 1.10 | 0.04852 | 0.00260 | 0.14118 | 0.00744 | 0.02111 | 0.00041 | 0.00627 | 0.00081 | 125 | 121 | 134 | 7  | 135 | 3.0 | 126 | 16 | 1.0 |
| LC04-24 | 189 | 112 | 1.69 | 0.04868 | 0.00505 | 0.14102 | 0.01432 | 0.02101 | 0.00060 | 0.00370 | 0.00039 | 132 | 232 | 134 | 13 | 134 | 4.0 | 75  | 8  | 1.0 |
|         |     |     |      |         |         |         |         |         |         |         |         |     |     |     |    |     |     |     |    |     |
| HJ07-01 | 227 | 290 | 0.78 | 0.04884 | 0.00173 | 0.13831 | 0.00492 | 0.02054 | 0.00034 | 0.00540 | 0.00032 | 140 | 83  | 132 | 4  | 131 | 2.0 | 109 | 6  | 1.0 |
| HJ07-02 | 445 | 419 | 1.06 | 0.04878 | 0.00140 | 0.13364 | 0.00396 | 0.01987 | 0.00032 | 0.00378 | 0.00018 | 137 | 69  | 127 | 4  | 127 | 2.0 | 76  | 4  | 1.0 |
| HJ07-03 | 192 | 211 | 0.91 | 0.04887 | 0.00259 | 0.13723 | 0.00721 | 0.02037 | 0.00040 | 0.00340 | 0.00022 | 142 | 121 | 131 | 6  | 130 | 3.0 | 69  | 4  | 1.0 |
| HJ07-04 | 186 | 229 | 0.81 | 0.04866 | 0.00203 | 0.13408 | 0.00561 | 0.01999 | 0.00035 | 0.00346 | 0.00019 | 131 | 96  | 128 | 5  | 128 | 2.0 | 70  | 4  | 1.0 |
| HJ07-05 | 91  | 138 | 0.66 | 0.04872 | 0.00293 | 0.13858 | 0.00826 | 0.02063 | 0.00040 | 0.00492 | 0.00040 | 134 | 136 | 132 | 7  | 132 | 3.0 | 99  | 8  | 1.0 |
| HJ07-06 | 186 | 250 | 0.74 | 0.04865 | 0.00382 | 0.13335 | 0.01023 | 0.01992 | 0.00053 | 0.00203 | 0.00021 | 131 | 177 | 127 | 9  | 127 | 3.0 | 41  | 4  | 1.0 |
| HJ07-07 | 158 | 186 | 0.85 | 0.04884 | 0.00288 | 0.13560 | 0.00791 | 0.02015 | 0.00042 | 0.00316 | 0.00023 | 140 | 134 | 129 | 7  | 129 | 3.0 | 64  | 5  | 1.0 |
| HJ07-08 | 234 | 275 | 0.85 | 0.05012 | 0.00359 | 0.14205 | 0.00988 | 0.02057 | 0.00049 | 0.00775 | 0.00152 | 201 | 164 | 135 | 9  | 131 | 3.0 | 156 | 30 | 1.0 |
| HJ07-09 | 138 | 175 | 0.79 | 0.04866 | 0.00246 | 0.13609 | 0.00684 | 0.02029 | 0.00038 | 0.00519 | 0.00043 | 131 | 115 | 130 | 6  | 129 | 2.0 | 105 | 9  | 1.0 |
| HJ07-10 | 131 | 153 | 0.86 | 0.04860 | 0.00288 | 0.13722 | 0.00808 | 0.02049 | 0.00040 | 0.00410 | 0.00033 | 129 | 134 | 131 | 7  | 131 | 3.0 | 83  | 7  | 1.0 |
| HJ07-11 | 139 | 497 | 0.70 | 0.04962 | 0.00447 | 0.15536 | 0.01359 | 0.02275 | 0.00069 | 0.00159 | 0.00016 | 177 | 205 | 147 | 12 | 145 | 4.0 | 32  | 3  | 1.0 |
| HJ07-12 | 153 | 190 | 0.80 | 0.04874 | 0.00223 | 0.13556 | 0.00621 | 0.02018 | 0.00036 | 0.00468 | 0.00028 | 135 | 104 | 129 | 6  | 129 | 2.0 | 94  | 6  | 1.0 |
| HJ07-13 | 220 | 265 | 0.83 | 0.04872 | 0.00209 | 0.13658 | 0.00588 | 0.02034 | 0.00037 | 0.00436 | 0.00029 | 134 | 99  | 130 | 5  | 130 | 2.0 | 88  | 6  | 1.0 |
| HJ07-14 | 301 | 364 | 0.83 | 0.04861 | 0.00164 | 0.13678 | 0.00467 | 0.02042 | 0.00033 | 0.00552 | 0.00039 | 129 | 79  | 130 | 4  | 130 | 2.0 | 111 | 8  | 1.0 |
| HJ07-15 | 101 | 163 | 0.62 | 0.04851 | 0.00271 | 0.13854 | 0.00770 | 0.02072 | 0.00040 | 0.00434 | 0.00033 | 124 | 126 | 132 | 7  | 132 | 3.0 | 88  | 7  | 1.0 |
| HJ07-16 | 198 | 294 | 0.67 | 0.04877 | 0.00168 | 0.13820 | 0.00484 | 0.02056 | 0.00034 | 0.00519 | 0.00038 | 137 | 81  | 131 | 4  | 131 | 2.0 | 105 | 8  | 1.0 |
| HJ07-17 | 166 | 185 | 0.89 | 0.04870 | 0.00509 | 0.13440 | 0.01364 | 0.02003 | 0.00060 | 0.00639 | 0.00124 | 133 | 234 | 128 | 12 | 128 | 4.0 | 129 | 25 | 1.0 |
| HJ07-18 | 158 | 201 | 0.78 | 0.04871 | 0.00218 | 0.13949 | 0.00624 | 0.02077 | 0.00036 | 0.00553 | 0.00046 | 134 | 102 | 133 | 6  | 133 | 2.0 | 111 | 9  | 1.0 |
| HJ07-19 | 96  | 146 | 0.66 | 0.05347 | 0.00299 | 0.15155 | 0.00839 | 0.02056 | 0.00042 | 0.00480 | 0.00043 | 349 | 130 | 143 | 7  | 131 | 3.0 | 97  | 9  | 0.9 |
| HJ07-20 | 207 | 290 | 0.71 | 0.04844 | 0.00212 | 0.13594 | 0.00596 | 0.02036 | 0.00039 | 0.00404 | 0.00036 | 121 | 99  | 129 | 5  | 130 | 2.0 | 81  | 7  | 1.0 |
| HJ07-21 | 141 | 179 | 0.79 | 0.04816 | 0.00566 | 0.13780 | 0.01568 | 0.02077 | 0.00070 | 0.00636 | 0.00168 | 107 | 248 | 131 | 14 | 133 | 4.0 | 128 | 34 | 1.0 |
|         |     |     |      |         |         |         |         |         |         |         |         |     |     |     |    |     |     |     |    |     |
| SC02-01 | 106 | 132 | 0.81 | 0.04662 | 0.00376 | 0.12357 | 0.00984 | 0.01922 | 0.00042 | 0.00535 | 0.00042 | 30  | 180 | 118 | 9  | 123 | 3.0 | 108 | 8  | 1.0 |
| SC02-02 | 45  | 57  | 0.80 | 0.05079 | 0.01795 | 0.12739 | 0.04410 | 0.01818 | 0.00136 | 0.00229 | 0.00061 | 231 | 616 | 122 | 40 | 116 | 9.0 | 46  | 12 | 1.0 |
| SC02-03 | 69  | 83  | 0.83 | 0.04905 | 0.00693 | 0.12948 | 0.01794 | 0.01914 | 0.00062 | 0.00591 | 0.00089 | 150 | 283 | 124 | 16 | 122 | 4.0 | 119 | 18 | 1.0 |
| SC02-04 | 43  | 58  | 0.74 | 0.05090 | 0.01082 | 0.13310 | 0.02778 | 0.01895 | 0.00085 | 0.00302 | 0.00046 | 236 | 397 | 127 | 25 | 121 | 5.0 | 61  | 9  | 1.0 |
| SC02-05 | 70  | 70  |      |         |         |         |         |         |         |         |         |     |     |     |    |     |     |     |    |     |

|         |      |      |      |         |         |         |         |         |         |         |         |     |     |     |    |     |      |     |    |     |
|---------|------|------|------|---------|---------|---------|---------|---------|---------|---------|---------|-----|-----|-----|----|-----|------|-----|----|-----|
| HS01-20 | 43   | 40   | 1.08 | 0.04996 | 0.01104 | 0.12548 | 0.02722 | 0.01821 | 0.00083 | 0.00530 | 0.00091 | 193 | 399 | 120 | 25 | 116 | 5.0  | 107 | 18 | 1.0 |
| HS02-01 | 374  | 350  | 1.07 | 0.04704 | 0.00169 | 0.12461 | 0.00449 | 0.01921 | 0.00032 | 0.00552 | 0.00036 | 51  | 78  | 119 | 4  | 123 | 2.0  | 111 | 7  | 1.0 |
| HS02-02 | 503  | 412  | 1.22 | 0.05025 | 0.00133 | 0.12929 | 0.00353 | 0.01866 | 0.00029 | 0.00541 | 0.00029 | 207 | 63  | 123 | 3  | 119 | 2.0  | 109 | 6  | 1.0 |
| HS02-03 | 265  | 240  | 1.10 | 0.04854 | 0.00400 | 0.12796 | 0.01022 | 0.01912 | 0.00052 | 0.00470 | 0.00058 | 126 | 186 | 122 | 9  | 122 | 3.0  | 95  | 12 | 1.0 |
| HS02-04 | 216  | 128  | 1.68 | 0.04959 | 0.01092 | 0.12678 | 0.02698 | 0.01857 | 0.00114 | 0.00209 | 0.00038 | 176 | 395 | 121 | 24 | 119 | 7.0  | 42  | 8  | 1.0 |
| HS02-05 | 44   | 26   | 0.40 | 0.06363 | 0.00470 | 1.05497 | 0.07538 | 0.12031 | 0.00331 | 0.01912 | 0.00298 | 729 | 462 | 731 | 37 | 732 | 19.0 | 383 | 59 | 1.0 |
| HS02-06 | 316  | 274  | 1.15 | 0.04851 | 0.00192 | 0.13613 | 0.00535 | 0.02036 | 0.00036 | 0.00558 | 0.00042 | 124 | 91  | 130 | 5  | 130 | 2.0  | 112 | 8  | 1.0 |
| HS02-07 | 483  | 437  | 1.10 | 0.04838 | 0.00342 | 0.12837 | 0.00880 | 0.01925 | 0.00049 | 0.00490 | 0.00076 | 118 | 159 | 123 | 8  | 123 | 3.0  | 99  | 15 | 1.0 |
| HS02-08 | 408  | 320  | 1.27 | 0.04745 | 0.00421 | 0.12620 | 0.01086 | 0.01930 | 0.00056 | 0.00452 | 0.00079 | 72  | 196 | 121 | 10 | 123 | 4.0  | 91  | 16 | 1.0 |
| HS02-09 | 409  | 115  | 3.54 | 0.04966 | 0.00781 | 0.14448 | 0.02205 | 0.02109 | 0.00093 | 0.00281 | 0.00035 | 179 | 315 | 137 | 20 | 135 | 6.0  | 57  | 7  | 1.0 |
| HS02-10 | 52   | 45   | 1.15 | 0.06416 | 0.00198 | 1.05205 | 0.03282 | 0.11894 | 0.00197 | 0.03311 | 0.00258 | 747 | 67  | 730 | 16 | 724 | 11.0 | 658 | 50 | 1.0 |
| HS02-11 | 400  | 183  | 2.18 | 0.04847 | 0.00594 | 0.12770 | 0.01517 | 0.01911 | 0.00072 | 0.00181 | 0.00023 | 122 | 254 | 122 | 14 | 122 | 5.0  | 37  | 5  | 1.0 |
| HS03-01 | 163  | 204  | 0.80 | 0.04898 | 0.00465 | 0.12853 | 0.01184 | 0.01903 | 0.00056 | 0.00467 | 0.00059 | 147 | 215 | 123 | 11 | 122 | 4.0  | 94  | 12 | 1.0 |
| HS03-02 | 181  | 143  | 1.26 | 0.04924 | 0.00595 | 0.13968 | 0.01634 | 0.02056 | 0.00075 | 0.00170 | 0.00017 | 159 | 256 | 133 | 15 | 131 | 5.0  | 34  | 3  | 1.0 |
| HS03-03 | 97   | 100  | 0.98 | 0.04886 | 0.00508 | 0.14283 | 0.01447 | 0.02120 | 0.00061 | 0.00854 | 0.00106 | 141 | 233 | 136 | 13 | 135 | 4.0  | 172 | 21 | 1.0 |
| HS03-04 | 194  | 138  | 1.41 | 0.05121 | 0.00361 | 0.14074 | 0.00970 | 0.01994 | 0.00047 | 0.00228 | 0.00014 | 250 | 162 | 134 | 9  | 127 | 3.0  | 46  | 3  | 0.9 |
| HS03-05 | 79   | 84   | 0.93 | 0.06632 | 0.00154 | 1.27356 | 0.03103 | 0.13929 | 0.00223 | 0.03082 | 0.00184 | 816 | 50  | 834 | 14 | 841 | 13.0 | 614 | 36 | 1.0 |
| HS03-06 | 120  | 157  | 0.76 | 0.04754 | 0.00424 | 0.12310 | 0.01071 | 0.01879 | 0.00051 | 0.00455 | 0.00052 | 76  | 197 | 118 | 10 | 120 | 3.0  | 92  | 10 | 1.0 |
| HS03-07 | 435  | 247  | 1.76 | 0.05026 | 0.00420 | 0.14292 | 0.01149 | 0.02062 | 0.00057 | 0.00706 | 0.00124 | 207 | 191 | 136 | 10 | 132 | 4.0  | 142 | 25 | 1.0 |
| HS03-08 | 294  | 237  | 1.24 | 0.04897 | 0.00403 | 0.13699 | 0.01094 | 0.02029 | 0.00055 | 0.00419 | 0.00057 | 146 | 186 | 130 | 10 | 129 | 3.0  | 85  | 11 | 1.0 |
| HS03-09 | 91   | 408  | 0.85 | 0.06721 | 0.00173 | 1.25709 | 0.03293 | 0.13568 | 0.00214 | 0.04145 | 0.00398 | 844 | 55  | 827 | 15 | 820 | 12.0 | 821 | 77 | 1.0 |
| HS03-10 | 116  | 145  | 0.80 | 0.04704 | 0.00332 | 0.11998 | 0.00831 | 0.01850 | 0.00042 | 0.00169 | 0.00012 | 51  | 157 | 115 | 8  | 118 | 3.0  | 34  | 2  | 1.0 |
| HS03-12 | 131  | 141  | 0.93 | 0.04956 | 0.00271 | 0.13652 | 0.00735 | 0.01998 | 0.00038 | 0.00588 | 0.00040 | 174 | 125 | 130 | 7  | 128 | 2.0  | 118 | 8  | 1.0 |
| HS03-13 | 791  | 308  | 2.57 | 0.04746 | 0.00658 | 0.12256 | 0.01640 | 0.01873 | 0.00076 | 0.00440 | 0.00094 | 72  | 268 | 117 | 15 | 120 | 5.0  | 89  | 19 | 1.0 |
| HS03-14 | 390  | 295  | 1.32 | 0.04744 | 0.00294 | 0.12254 | 0.00743 | 0.01874 | 0.00042 | 0.00401 | 0.00037 | 71  | 137 | 117 | 7  | 120 | 3.0  | 81  | 7  | 1.0 |
| HS03-15 | 120  | 106  | 1.13 | 0.04641 | 0.00756 | 0.12897 | 0.02041 | 0.02017 | 0.00085 | 0.00604 | 0.00117 | 19  | 291 | 123 | 18 | 129 | 5.0  | 122 | 24 | 1.0 |
| HS03-16 | 129  | 213  | 0.60 | 0.04861 | 0.00187 | 0.12532 | 0.00483 | 0.01870 | 0.00031 | 0.00316 | 0.00017 | 129 | 89  | 120 | 4  | 119 | 2.0  | 64  | 3  | 1.0 |
| HS03-17 | 133  | 163  | 0.82 | 0.04780 | 0.00249 | 0.12585 | 0.00651 | 0.01910 | 0.00037 | 0.00280 | 0.00017 | 89  | 116 | 120 | 6  | 122 | 2.0  | 57  | 3  | 1.0 |
| HS03-18 | 1133 | 2253 | 0.50 | 0.04887 | 0.00131 | 0.12632 | 0.00347 | 0.01875 | 0.00031 | 0.00474 | 0.00050 | 142 | 64  | 121 | 3  | 120 | 2.0  | 96  | 10 | 1.0 |
| HS03-19 | 578  | 455  | 1.27 | 0.04897 | 0.00302 | 0.13666 | 0.00820 | 0.02023 | 0.00051 | 0.00169 | 0.00015 | 146 | 140 | 130 | 7  | 129 | 3.0  | 34  | 3  | 1.0 |
| HS03-20 | 2883 | 1171 | 2.46 | 0.04816 | 0.00343 | 0.13283 | 0.00913 | 0.02000 | 0.00054 | 0.00236 | 0.00042 | 107 | 160 | 127 | 8  | 128 | 3.0  | 48  | 8  | 1.0 |
| HS03-21 | 361  | 411  | 0.88 | 0.04912 | 0.00348 | 0.12508 | 0.00858 | 0.01849 | 0.00049 | 0.00260 | 0.00035 | 154 | 161 | 120 | 8  | 118 | 3.0  | 52  | 7  | 1.0 |

M8, W Pujiang (Li JH et al., 2014)

|           |     |     |      |        |     |        |     |         |     |      |     |       |     |
|-----------|-----|-----|------|--------|-----|--------|-----|---------|-----|------|-----|-------|-----|
| zj36-1.1  | 243 | 337 | 0.75 | 0.0487 | 9.7 | 0.137  | 9.8 | 0.02045 | 1.4 | 135  | 230 | 130.5 | 1.8 |
| zj36-1.2  | 702 | 359 | 2.02 | 0.0472 | 13  | 0.133  | 13  | 0.0205  | 1.5 | 57   | 310 | 130.8 | 1.9 |
| zj36-1.3  | 156 | 296 | 0.55 | 0.0383 | 19  | 0.108  | 19  | 0.02038 | 1.5 | -466 | 500 | 130.1 | 2.0 |
| zj36-1.4  | 173 | 354 | 0.51 | 0.0545 | 13  | 0.151  | 13  | 0.0201  | 1.5 | 391  | 300 | 128.3 | 1.9 |
| zj36-1.5  | 246 | 361 | 0.7  | 0.0503 | 11  | 0.208  | 11  | 0.02996 | 1.4 | 210  | 250 | 129.3 | 2.5 |
| zj36-1.6  | 553 | 441 | 1.3  | 0.0502 | 14  | 0.138  | 14  | 0.01995 | 1.5 | 204  | 330 | 127.3 | 1.9 |
| zj36-1.7  | 246 | 284 | 0.9  | 0.046  | 33  | 0.128  | 33  | 0.02015 | 2.5 | 3    | 790 | 128.6 | 3.2 |
| zj36-1.8  | 701 | 900 | 0.81 | 0.0463 | 6.4 | 0.1301 | 6.5 | 0.02037 | 1.1 | 15   | 150 | 130   | 1.4 |
| zj36-1.9  | 205 | 434 | 0.49 | 0.0476 | 4.1 | 0.1351 | 4.3 | 0.02057 | 1.2 | 81   | 97  | 131.3 | 1.6 |
| zj36-1.10 | 154 | 106 | 1.5  | 0.061  | 22  | 0.169  | 22  | 0.0201  | 2.2 | 642  | 470 | 128.3 | 2.8 |
| zj36-1.11 | 271 | 380 | 0.74 | 0.0513 | 10  | 0.145  | 10  | 0.02055 | 1.5 | 256  | 230 | 131.1 | 1.9 |
| zj36-1.12 | 123 | 175 | 0.73 | 0.055  | 19  | 0.154  | 19  | 0.0201  | 2   | 430  | 430 | 128.3 | 2.6 |
| zj36-1.13 | 202 | 240 | 0.87 | 0.0491 | 20  | 0.137  | 20  | 0.02029 | 1.7 | 152  | 460 | 129.5 | 2.3 |
| zj36-1.14 | 148 | 175 | 0.87 | 0.046  | 28  | 0.126  | 28  | 0.02014 | 2.1 | -27  | 680 | 128.6 | 2.7 |

M9, Jiande Group in Jiande (Samples with letters LC, HJ, and SC from Liu et al., 2014; others from Wang et al., 2016)

|         |     |      |      |         |         |         |         |         |         |         |         |     |     |     |    |     |     |     |    |     |
|---------|-----|------|------|---------|---------|---------|---------|---------|---------|---------|---------|-----|-----|-----|----|-----|-----|-----|----|-----|
| LC01-01 | 157 | 264  | 0.59 | 0.04944 | 0.00204 | 0.13997 | 0.00579 | 0.02053 | 0.00033 | 0.00624 | 0.00046 | 169 | 97  | 133 | 5  | 131 | 2.0 | 126 | 9  | 1.0 |
| LC01-02 | 733 | 1066 | 0.69 | 0.04869 | 0.00099 | 0.13984 | 0.00311 | 0.02083 | 0.00032 | 0.00289 | 0.00011 | 133 | 49  | 133 | 3  | 133 | 2.0 | 58  | 2  | 1.0 |
| LC01-03 | 182 | 291  | 0.62 | 0.04891 | 0.00455 | 0.13904 | 0.01261 | 0.02062 | 0.00056 | 0.00567 | 0.00093 | 144 | 211 | 132 | 11 | 132 | 4.0 | 114 | 19 | 1.0 |
| LC01-04 | 128 | 228  | 0.56 | 0.04818 | 0.00245 | 0.13591 | 0.00687 | 0.02046 | 0.00036 | 0.00672 | 0.00060 | 108 | 115 | 129 | 6  | 131 | 2.0 | 135 | 12 | 1.0 |
| LC01-05 | 323 | 333  | 0.97 | 0.04993 | 0.00277 | 0.13911 | 0.00756 | 0.02021 | 0.00039 | 0.00551 | 0.00069 | 192 | 128 | 132 | 7  | 129 | 2.0 | 111 | 14 | 1.0 |
| LC01-06 | 264 | 375  | 0.70 | 0.04960 | 0.00178 | 0.13858 | 0.00499 | 0.02027 | 0.00033 | 0.00618 | 0.00053 | 176 | 85  | 132 | 4  | 129 | 2.0 | 125 | 11 | 1.0 |
| LC01-07 | 203 | 317  | 0.64 | 0.04864 | 0.00184 | 0.13865 | 0.00529 | 0.02068 | 0.00035 | 0.00382 | 0.00023 | 131 | 88  | 132 | 5  | 132 | 2.0 | 77  | 5  | 1.0 |
| LC01-08 | 154 | 100  | 1.54 | 0.04795 | 0.00938 | 0.13526 | 0.02586 | 0.02047 | 0.00090 | 0.00701 | 0.00166 | 97  | 348 | 129 | 23 | 131 | 6.0 | 141 | 33 | 1.0 |
| LC01-09 | 177 | 335  | 0.53 | 0.04923 | 0.00317 | 0.13915 | 0.00880 | 0.02050 | 0.00046 | 0.00491 | 0.00068 | 159 | 146 | 132 | 8  | 131 | 3.0 | 99  | 14 | 1.0 |
| LC01-10 | 362 | 664  | 0.55 | 0.04805 | 0.00514 | 0.13483 | 0.01400 | 0.02042 | 0.00077 | 0.00147 | 0.00027 | 102 | 233 | 128 | 13 | 130 | 5.0 | 30  | 5  | 1.0 |
| LC01-11 | 238 | 296  | 0.80 | 0.04885 | 0.00289 | 0.13702 | 0.00802 | 0.02035 | 0.00043 | 0.00281 | 0.00018 | 141 | 134 | 130 | 7  | 130 | 3.0 | 57  | 4  | 1.0 |
| LC01-12 | 360 | 420  | 0.86 | 0.04744 | 0.00171 | 0.13470 | 0.00491 | 0.02059 | 0.00034 | 0.00535 | 0.00037 | 71  | 80  | 128 | 4  | 131 | 2.0 | 108 | 7  | 1.0 |
| LC01-13 | 91  | 124  | 0.73 | 0.04788 | 0.00522 | 0.13747 | 0.01471 | 0.02083 | 0.00055 | 0.00759 | 0.00107 | 93  | 232 | 131 | 13 | 133 | 3.0 | 153 | 21 | 1.0 |
| LC01-14 | 175 | 272  | 0.64 | 0.05003 | 0.00256 | 0.14066 | 0.00707 | 0.02039 | 0.00037 | 0.00730 | 0.00082 | 196 | 119 | 134 | 6  | 130 | 2.0 | 147 | 16 | 1.0 |
| LC01-15 | 65  | 85   | 0.76 | 0.04907 | 0.00504 | 0.14097 | 0.01435 | 0.02084 | 0.00046 | 0.00641 | 0.00067 | 151 | 230 | 134 | 13 | 133 | 3.0 | 129 | 13 | 1.0 |
| LC01-16 | 539 | 649  | 0.83 | 0.04883 | 0.00205 | 0.13744 | 0.00571 | 0.02042 | 0.00037 | 0.00585 | 0.00074 | 140 | 97  | 131 | 5  | 130 | 2.0 | 118 | 15 | 1.0 |
| LC01-17 | 553 | 675  | 0.82 | 0.04968 | 0.00238 | 0.13891 | 0.00655 | 0.02028 | 0.00040 | 0.00533 | 0.00069 | 180 | 111 | 132 | 6  | 129 | 3.0 | 107 | 14 | 1.0 |
| LC01-18 | 178 | 337  | 0.53 | 0.04935 | 0.00578 | 0.14051 | 0.01594 | 0.02067 | 0.00071 | 0.00494 | 0.00111 | 164 | 254 | 133 | 14 | 132 | 4.0 | 100 | 22 | 1.0 |



|         |      |      |      |         |         |         |         |         |         |         |         |     |     |     |    |     |     |     |    |     |
|---------|------|------|------|---------|---------|---------|---------|---------|---------|---------|---------|-----|-----|-----|----|-----|-----|-----|----|-----|
| LC02-13 | 526  | 474  | 1.11 | 0.04801 | 0.00188 | 0.14025 | 0.00547 | 0.02119 | 0.00037 | 0.00667 | 0.00068 | 100 | 89  | 133 | 5  | 135 | 2.0 | 134 | 14 | 1.0 |
| LC02-14 | 517  | 488  | 1.06 | 0.04949 | 0.00141 | 0.14367 | 0.00420 | 0.02105 | 0.00034 | 0.00546 | 0.00038 | 171 | 68  | 136 | 4  | 134 | 2.0 | 110 | 8  | 1.0 |
| LC02-15 | 639  | 485  | 1.32 | 0.04978 | 0.00472 | 0.14648 | 0.01345 | 0.02134 | 0.00067 | 0.00411 | 0.00072 | 185 | 216 | 139 | 12 | 136 | 4.0 | 83  | 14 | 1.0 |
| LC02-16 | 645  | 430  | 1.50 | 0.04856 | 0.00295 | 0.14435 | 0.00854 | 0.02156 | 0.00048 | 0.00679 | 0.00107 | 127 | 137 | 137 | 8  | 138 | 3.0 | 137 | 21 | 1.0 |
| LC02-17 | 885  | 776  | 1.14 | 0.04898 | 0.00121 | 0.14341 | 0.00374 | 0.02124 | 0.00034 | 0.00487 | 0.00034 | 147 | 59  | 136 | 3  | 135 | 2.0 | 98  | 7  | 1.0 |
| LC02-18 | 1651 | 844  | 1.96 | 0.04797 | 0.00292 | 0.14025 | 0.00834 | 0.02120 | 0.00052 | 0.00247 | 0.00029 | 98  | 136 | 133 | 7  | 135 | 3.0 | 50  | 6  | 1.0 |
| LC02-19 | 602  | 422  | 1.43 | 0.05224 | 0.00555 | 0.15143 | 0.01545 | 0.02102 | 0.00078 | 0.00180 | 0.00026 | 296 | 243 | 143 | 14 | 134 | 5.0 | 36  | 5  | 0.9 |
| LC02-20 | 432  | 421  | 1.02 | 0.04736 | 0.00136 | 0.13992 | 0.00414 | 0.02143 | 0.00035 | 0.00318 | 0.00017 | 67  | 64  | 133 | 4  | 137 | 2.0 | 64  | 3  | 1.0 |
| LC02-21 | 270  | 162  | 1.66 | 0.04666 | 0.00536 | 0.13155 | 0.01477 | 0.02045 | 0.00064 | 0.00304 | 0.00036 | 32  | 232 | 125 | 13 | 130 | 4.0 | 61  | 7  | 1.0 |
| LC02-22 | 503  | 510  | 0.99 | 0.04893 | 0.00172 | 0.14354 | 0.00510 | 0.02128 | 0.00037 | 0.00511 | 0.00047 | 144 | 83  | 136 | 5  | 136 | 2.0 | 103 | 9  | 1.0 |
| LC02-23 | 429  | 338  | 1.27 | 0.04912 | 0.00200 | 0.14350 | 0.00586 | 0.02119 | 0.00038 | 0.00472 | 0.00042 | 154 | 95  | 136 | 5  | 135 | 2.0 | 95  | 8  | 1.0 |
| LC02-24 | 362  | 363  | 1.00 | 0.05010 | 0.00183 | 0.14694 | 0.00541 | 0.02127 | 0.00037 | 0.00443 | 0.00037 | 200 | 87  | 139 | 5  | 136 | 2.0 | 89  | 7  | 1.0 |
| LC02-25 | 1163 | 606  | 1.92 | 0.04884 | 0.00205 | 0.14388 | 0.00602 | 0.02137 | 0.00042 | 0.00342 | 0.00033 | 140 | 97  | 136 | 5  | 136 | 3.0 | 69  | 7  | 1.0 |
|         |      |      |      |         |         |         |         |         |         |         |         |     |     |     |    |     |     |     |    |     |
| HJ01-02 | 107  | 134  | 0.80 | 0.04878 | 0.00387 | 0.13708 | 0.01071 | 0.02038 | 0.00048 | 0.00428 | 0.00034 | 137 | 179 | 130 | 10 | 130 | 3.0 | 86  | 7  | 1.0 |
| HJ01-03 | 58   | 94   | 0.62 | 0.05009 | 0.00758 | 0.14100 | 0.02084 | 0.02041 | 0.00076 | 0.00388 | 0.00076 | 199 | 305 | 134 | 19 | 130 | 5.0 | 78  | 15 | 1.0 |
| HJ01-04 | 299  | 126  | 2.38 | 0.04907 | 0.00463 | 0.13588 | 0.01255 | 0.02008 | 0.00051 | 0.00510 | 0.00058 | 151 | 214 | 129 | 11 | 128 | 3.0 | 103 | 12 | 1.0 |
| HJ01-05 | 62   | 25   | 2.54 | 0.04716 | 0.01503 | 0.13403 | 0.04239 | 0.02061 | 0.00089 | 0.00546 | 0.00053 | 57  | 524 | 128 | 38 | 132 | 6.0 | 110 | 11 | 1.0 |
| HJ01-06 | 124  | 141  | 0.88 | 0.04890 | 0.00338 | 0.13467 | 0.00916 | 0.01997 | 0.00041 | 0.00566 | 0.00055 | 143 | 157 | 128 | 8  | 127 | 3.0 | 114 | 11 | 1.0 |
| HJ01-07 | 73   | 91   | 0.80 | 0.04843 | 0.00472 | 0.13743 | 0.01320 | 0.02058 | 0.00049 | 0.00637 | 0.00070 | 120 | 217 | 131 | 12 | 131 | 3.0 | 128 | 14 | 1.0 |
| HJ01-08 | 64   | 92   | 0.70 | 0.04886 | 0.00614 | 0.13609 | 0.01679 | 0.02020 | 0.00062 | 0.00382 | 0.00046 | 141 | 261 | 130 | 15 | 129 | 4.0 | 77  | 9  | 1.0 |
| HJ01-09 | 69   | 94   | 0.74 | 0.04999 | 0.00858 | 0.13814 | 0.02313 | 0.02004 | 0.00086 | 0.00335 | 0.00060 | 195 | 326 | 131 | 21 | 128 | 5.0 | 68  | 12 | 1.0 |
| HJ01-10 | 107  | 135  | 0.79 | 0.04881 | 0.00411 | 0.13359 | 0.01103 | 0.01985 | 0.00046 | 0.00600 | 0.00078 | 139 | 190 | 127 | 10 | 127 | 3.0 | 121 | 16 | 1.0 |
| HJ01-11 | 520  | 764  | 0.68 | 0.04882 | 0.00152 | 0.13777 | 0.00440 | 0.02045 | 0.00037 | 0.00256 | 0.00015 | 139 | 74  | 131 | 4  | 130 | 2.0 | 52  | 3  | 1.0 |
| HJ01-12 | 424  | 201  | 2.11 | 0.05120 | 0.00271 | 0.14062 | 0.00736 | 0.01992 | 0.00038 | 0.00510 | 0.00035 | 250 | 124 | 134 | 7  | 127 | 2.0 | 103 | 7  | 0.9 |
| HJ01-13 | 88   | 115  | 0.77 | 0.04912 | 0.00497 | 0.13819 | 0.01369 | 0.02039 | 0.00058 | 0.00304 | 0.00029 | 154 | 227 | 131 | 12 | 130 | 4.0 | 61  | 6  | 1.0 |
| HJ01-14 | 142  | 153  | 0.92 | 0.05007 | 0.00408 | 0.13923 | 0.01112 | 0.02017 | 0.00049 | 0.00436 | 0.00039 | 198 | 186 | 132 | 10 | 129 | 3.0 | 88  | 8  | 1.0 |
| HJ01-15 | 106  | 71   | 1.49 | 0.04915 | 0.00517 | 0.13723 | 0.01427 | 0.02025 | 0.00048 | 0.00474 | 0.00036 | 155 | 236 | 131 | 13 | 129 | 3.0 | 96  | 7  | 1.0 |
| HJ01-16 | 55   | 68   | 0.82 | 0.04999 | 0.00761 | 0.15611 | 0.02326 | 0.02265 | 0.00081 | 0.00553 | 0.00093 | 495 | 307 | 147 | 20 | 144 | 5.0 | 111 | 49 | 1.0 |
| HJ01-18 | 47   | 71   | 0.66 | 0.05066 | 0.00993 | 0.14116 | 0.02706 | 0.02021 | 0.00092 | 0.00693 | 0.00128 | 225 | 366 | 134 | 24 | 129 | 6.0 | 140 | 26 | 1.0 |
| HJ01-19 | 150  | 149  | 1.01 | 0.04928 | 0.00384 | 0.14132 | 0.01082 | 0.02080 | 0.00048 | 0.00507 | 0.00048 | 161 | 177 | 134 | 10 | 133 | 3.0 | 102 | 10 | 1.0 |
| HJ01-21 | 80   | 89   | 0.89 | 0.05288 | 0.00986 | 0.14909 | 0.02710 | 0.02044 | 0.00094 | 0.00404 | 0.00082 | 324 | 376 | 141 | 24 | 130 | 6.0 | 81  | 17 | 0.9 |
| HJ01-22 | 120  | 138  | 0.87 | 0.04839 | 0.00316 | 0.13498 | 0.00871 | 0.02023 | 0.00039 | 0.00578 | 0.00058 | 118 | 147 | 129 | 8  | 129 | 2.0 | 116 | 12 | 1.0 |
| HJ01-23 | 90   | 117  | 0.77 | 0.05033 | 0.01122 | 0.14158 | 0.03046 | 0.02038 | 0.00129 | 0.00185 | 0.00052 | 210 | 403 | 134 | 27 | 130 | 8.0 | 37  | 40 | 1.0 |
| HJ01-24 | 75   | 72   | 1.04 | 0.04908 | 0.00562 | 0.15409 | 0.01737 | 0.02277 | 0.00064 | 0.00399 | 0.00043 | 152 | 251 | 146 | 15 | 145 | 4.0 | 80  | 9  | 1.0 |
| HJ01-25 | 93   | 143  | 0.65 | 0.04913 | 0.00584 | 0.13728 | 0.01590 | 0.02026 | 0.00067 | 0.00670 | 0.00176 | 154 | 255 | 131 | 14 | 129 | 4.0 | 135 | 35 | 1.0 |
|         |      |      |      |         |         |         |         |         |         |         |         |     |     |     |    |     |     |     |    |     |
| HJ02-01 | 1038 | 1135 | 0.91 | 0.04859 | 0.00095 | 0.13389 | 0.00287 | 0.01998 | 0.00031 | 0.00488 | 0.00024 | 128 | 47  | 128 | 3  | 128 | 2.0 | 98  | 5  | 1.0 |
| HJ02-02 | 267  | 431  | 0.62 | 0.04716 | 0.00176 | 0.13002 | 0.00482 | 0.02001 | 0.00033 | 0.00629 | 0.00053 | 57  | 82  | 124 | 4  | 128 | 2.0 | 127 | 11 | 1.0 |
| HJ02-03 | 1576 | 2761 | 0.57 | 0.04880 | 0.00123 | 0.13364 | 0.00342 | 0.01988 | 0.00030 | 0.00709 | 0.00076 | 138 | 61  | 127 | 3  | 127 | 2.0 | 143 | 15 | 1.0 |
| HJ02-04 | 1491 | 2477 | 0.60 | 0.04888 | 0.00077 | 0.13426 | 0.00243 | 0.01993 | 0.00029 | 0.00557 | 0.00029 | 142 | 38  | 128 | 2  | 127 | 2.0 | 112 | 6  | 1.0 |
| HJ02-05 | 117  | 175  | 0.67 | 0.04676 | 0.00206 | 0.12895 | 0.00567 | 0.02001 | 0.00035 | 0.00530 | 0.00031 | 37  | 95  | 123 | 5  | 128 | 2.0 | 107 | 6  | 1.0 |
| HJ02-06 | 177  | 342  | 0.52 | 0.04852 | 0.00186 | 0.13354 | 0.00514 | 0.01996 | 0.00036 | 0.00426 | 0.00030 | 125 | 89  | 127 | 5  | 127 | 2.0 | 86  | 6  | 1.0 |
| HJ02-07 | 171  | 281  | 0.61 | 0.04937 | 0.00172 | 0.13563 | 0.00477 | 0.01993 | 0.00034 | 0.00533 | 0.00034 | 165 | 83  | 129 | 4  | 127 | 2.0 | 107 | 7  | 1.0 |
| HJ02-08 | 451  | 459  | 0.98 | 0.04867 | 0.00218 | 0.13499 | 0.00601 | 0.02012 | 0.00041 | 0.00347 | 0.00028 | 132 | 102 | 129 | 5  | 128 | 3.0 | 70  | 6  | 1.0 |
| HJ02-09 | 1872 | 2663 | 0.70 | 0.05025 | 0.00345 | 0.14047 | 0.00936 | 0.02028 | 0.00060 | 0.00187 | 0.00027 | 207 | 157 | 133 | 8  | 129 | 4.0 | 38  | 5  | 1.0 |
| HJ02-10 | 123  | 166  | 0.74 | 0.04828 | 0.00291 | 0.13286 | 0.00792 | 0.01996 | 0.00043 | 0.00365 | 0.00030 | 113 | 136 | 127 | 7  | 127 | 3.0 | 74  | 6  | 1.0 |
| HJ02-11 | 99   | 112  | 0.89 | 0.04927 | 0.00850 | 0.13339 | 0.02233 | 0.01964 | 0.00090 | 0.00631 | 0.00092 | 161 | 323 | 127 | 20 | 125 | 6.0 | 127 | 18 | 1.0 |
| HJ02-12 | 2148 | 2436 | 0.88 | 0.05414 | 0.00094 | 0.14720 | 0.00278 | 0.01973 | 0.00028 | 0.00635 | 0.00031 | 377 | 40  | 139 | 2  | 126 | 2.0 | 128 | 6  | 0.9 |
| HJ02-13 | 1223 | 2001 | 0.61 | 0.04736 | 0.00129 | 0.13092 | 0.00373 | 0.02005 | 0.00035 | 0.00350 | 0.00019 | 67  | 61  | 125 | 3  | 128 |     |     |    |     |

|            |      |      |      |         |         |         |         |         |         |         |         |     |     |     |    |       |      |     |    |     |
|------------|------|------|------|---------|---------|---------|---------|---------|---------|---------|---------|-----|-----|-----|----|-------|------|-----|----|-----|
| SC01-17    | 152  | 212  | 0.72 | 0.04907 | 0.00502 | 0.13590 | 0.01354 | 0.02009 | 0.00061 | 0.00476 | 0.00076 | 151 | 229 | 129 | 12 | 128   | 4.0  | 96  | 15 | 1.0 |
| SC01-19    | 129  | 171  | 0.76 | 0.04835 | 0.00414 | 0.13622 | 0.01134 | 0.02043 | 0.00052 | 0.00748 | 0.00129 | 116 | 193 | 130 | 10 | 130   | 3.0  | 151 | 26 | 1.0 |
| SC01-20    | 458  | 299  | 1.53 | 0.04873 | 0.00350 | 0.13711 | 0.00962 | 0.02041 | 0.00050 | 0.00444 | 0.00065 | 135 | 162 | 130 | 9  | 130   | 3.0  | 90  | 13 | 1.0 |
| SC01-21    | 83   | 74   | 1.12 | 0.05602 | 0.00212 | 0.57601 | 0.02189 | 0.07458 | 0.00131 | 0.01767 | 0.00163 | 453 | 86  | 462 | 14 | 464   | 8.0  | 354 | 32 | 1.0 |
|            |      |      |      |         |         |         |         |         |         |         |         |     |     |     |    |       |      |     |    |     |
| T0003-1.1  | 117  | 157  | 0.75 | 0.0483  | 0.0094  | 0.1400  | 0.0096  | 0.0210  | 0.0020  |         |         |     |     |     |    | 133.9 | 3.2  |     |    |     |
| T0003-2.1  | 138  | 411  | 0.34 | 0.0467  | 0.0044  | 0.1401  | 0.0047  | 0.0217  | 0.0017  |         |         |     |     |     |    | 138.7 | 2.4  |     |    |     |
| T0003-3.1  | 226  | 120  | 1.88 | 0.0390  | 0.0061  | 0.8990  | 0.0063  | 0.1669  | 0.0018  |         |         |     |     |     |    | 996.0 | 27.0 |     |    |     |
| T0003-4.1  | 41   | 74   | 0.55 | 0.0720  | 0.0510  | 0.2200  | 0.0510  | 0.0227  | 0.0028  |         |         |     |     |     |    | 144.9 | 8.0  |     |    |     |
| T0003-5.1  | 31   | 62   | 0.50 | 0.0658  | 0.0042  | 1.3860  | 0.0047  | 0.1527  | 0.0022  |         |         |     |     |     |    | 916.0 | 21.0 |     |    |     |
| T0003-6.1  | 447  | 926  | 0.48 | 0.0592  | 0.0100  | 0.1730  | 0.0110  | 0.0212  | 0.0015  |         |         |     |     |     |    | 135.1 | 2.5  |     |    |     |
| T0003-7.1  | 151  | 306  | 0.49 | 0.0409  | 0.0087  | 0.1190  | 0.0089  | 0.0211  | 0.0018  |         |         |     |     |     |    | 134.4 | 3.1  |     |    |     |
| T0003-8.1  | 229  | 409  | 0.56 | 0.0573  | 0.0040  | 0.1683  | 0.0044  | 0.0213  | 0.0018  |         |         |     |     |     |    | 135.9 | 2.6  |     |    |     |
| T0003-9.1  | 1757 | 2167 | 0.81 | 0.0866  | 0.0030  | 0.2588  | 0.0033  | 0.0217  | 0.0015  |         |         |     |     |     |    | 138.2 | 3.2  |     |    |     |
| T0003-10.1 | 365  | 744  | 0.49 | 0.0545  | 0.0039  | 0.1553  | 0.0042  | 0.0207  | 0.0015  |         |         |     |     |     |    | 131.9 | 2.4  |     |    |     |
| T0003-11.1 | 162  | 214  | 0.76 | 0.0679  | 0.0018  | 1.2560  | 0.0024  | 0.1342  | 0.0016  |         |         |     |     |     |    | 812.0 | 14.0 |     |    |     |
| T0003-13.1 | 87   | 181  | 0.48 | 0.0525  | 0.0059  | 0.1528  | 0.0062  | 0.0211  | 0.0019  |         |         |     |     |     |    | 134.6 | 2.8  |     |    |     |
| T0003-14.1 | 312  | 711  | 0.44 | 0.0543  | 0.0034  | 0.1573  | 0.0037  | 0.0210  | 0.0016  |         |         |     |     |     |    | 134.1 | 2.2  |     |    |     |
| T0003-15.1 | 462  | 700  | 0.66 | 0.0606  | 0.0039  | 0.1790  | 0.0042  | 0.0214  | 0.0016  |         |         |     |     |     |    | 136.7 | 2.4  |     |    |     |
| T0003-16.1 | 61   | 113  | 0.54 | 0.0557  | 0.0080  | 0.1720  | 0.0083  | 0.0224  | 0.0021  |         |         |     |     |     |    | 142.8 | 3.4  |     |    |     |
| T0003-17.1 | 59   | 103  | 0.57 | 0.0697  | 0.0039  | 1.3820  | 0.0044  | 0.1439  | 0.0020  |         |         |     |     |     |    | 866.0 | 18.0 |     |    |     |
| T0003-18.1 | 136  | 254  | 0.54 | 0.0456  | 0.0110  | 0.1820  | 0.0110  | 0.0289  | 0.0021  |         |         |     |     |     |    | 183.8 | 4.5  |     |    |     |
|            |      |      |      |         |         |         |         |         |         |         |         |     |     |     |    |       |      |     |    |     |
| T0004-1.1  | 114  | 98   | 1.16 | 0.0550  | 0.0320  | 0.1690  | 0.0320  | 0.0223  | 0.0023  |         |         |     |     |     |    | 141.9 | 5.0  |     |    |     |
| T0004-2.1  | 329  | 432  | 0.76 | 0.0483  | 0.0041  | 0.1406  | 0.0045  | 0.0211  | 0.0019  |         |         |     |     |     |    | 134.6 | 2.9  |     |    |     |
| T0004-3.1  | 338  | 188  | 1.80 | 0.0646  | 0.0092  | 0.1980  | 0.0094  | 0.0223  | 0.0019  |         |         |     |     |     |    | 142.0 | 4.1  |     |    |     |
| T0004-4.1  | 603  | 790  | 0.76 | 0.0606  | 0.0027  | 0.1792  | 0.0035  | 0.0215  | 0.0023  |         |         |     |     |     |    | 136.8 | 3.6  |     |    |     |
| T0004-5.1  | 853  | 483  | 1.77 | 0.0886  | 0.0058  | 0.2700  | 0.0064  | 0.0221  | 0.0027  |         |         |     |     |     |    | 140.9 | 6.9  |     |    |     |
| T0004-6.1  | 231  | 235  | 0.98 | 0.0493  | 0.0058  | 0.1458  | 0.0061  | 0.0214  | 0.0019  |         |         |     |     |     |    | 136.8 | 3.2  |     |    |     |
| T0004-7.1  | 636  | 442  | 1.44 | 0.0613  | 0.0067  | 0.1750  | 0.0070  | 0.0207  | 0.0017  |         |         |     |     |     |    | 132.3 | 3.1  |     |    |     |
| T0004-8.1  | 900  | 413  | 2.18 | 0.1010  | 0.0025  | 0.3028  | 0.0031  | 0.0217  | 0.0017  |         |         |     |     |     |    | 138.6 | 3.8  |     |    |     |
| T0004-9.1  | 424  | 431  | 0.98 | 0.0551  | 0.0049  | 0.1574  | 0.0051  | 0.0207  | 0.0017  |         |         |     |     |     |    | 132.1 | 2.7  |     |    |     |
| T0004-10.1 | 222  | 220  | 1.01 | 0.0647  | 0.0056  | 0.1990  | 0.0060  | 0.0223  | 0.0019  |         |         |     |     |     |    | 142.1 | 3.3  |     |    |     |
| T0004-11.1 | 151  | 163  | 0.93 | 0.0570  | 0.0070  | 0.1700  | 0.0073  | 0.0217  | 0.0020  |         |         |     |     |     |    | 138.3 | 3.5  |     |    |     |
| T0004-12.1 | 416  | 500  | 0.83 | 0.0575  | 0.0130  | 0.1630  | 0.0130  | 0.0205  | 0.0016  |         |         |     |     |     |    | 130.8 | 3.1  |     |    |     |
| T0004-13.1 | 226  | 144  | 1.57 | 0.0740  | 0.0230  | 0.2270  | 0.0230  | 0.0224  | 0.0020  |         |         |     |     |     |    | 142.5 | 9.3  |     |    |     |
| T0004-14.1 | 272  | 379  | 0.72 | 0.0497  | 0.0060  | 0.1413  | 0.0062  | 0.0206  | 0.0017  |         |         |     |     |     |    | 131.5 | 2.8  |     |    |     |
|            |      |      |      |         |         |         |         |         |         |         |         |     |     |     |    |       |      |     |    |     |
| T0007-1.1  | 561  | 617  | 0.91 | 0.0579  | 0.0029  | 0.1635  | 0.0033  | 0.0205  | 0.0016  |         |         |     |     |     |    | 130.8 | 2.4  |     |    |     |
| T0007-2.1  | 147  | 203  | 0.72 | 0.0546  | 0.0057  | 0.1608  | 0.0060  | 0.0214  | 0.0019  |         |         |     |     |     |    | 136.2 | 2.9  |     |    |     |
| T0007-3.1  | 226  | 256  | 0.88 | 0.0614  | 0.0130  | 0.1810  | 0.0130  | 0.0214  | 0.0017  |         |         |     |     |     |    | 136.6 | 6.3  |     |    |     |
| T0007-4.1  | 154  | 218  | 0.71 | 0.0530  | 0.0058  | 0.1470  | 0.0061  | 0.0201  | 0.0019  |         |         |     |     |     |    | 128.3 | 2.8  |     |    |     |
| T0007-5.1  | 340  | 398  | 0.85 | 0.0534  | 0.0040  | 0.1515  | 0.0045  | 0.0206  | 0.0021  |         |         |     |     |     |    | 131.3 | 3.3  |     |    |     |
| T0007-6.1  | 133  | 154  | 0.86 | 0.0550  | 0.0540  | 0.1600  | 0.0540  | 0.0212  | 0.0020  |         |         |     |     |     |    | 135.1 | 8.2  |     |    |     |
| T0007-7.1  | 79   | 468  | 0.17 | 0.1047  | 0.0012  | 1.4940  | 0.0020  | 0.1035  | 0.0015  |         |         |     |     |     |    | 634.8 | 9.4  |     |    |     |
| T0007-8.1  | 413  | 502  | 0.82 | 0.0522  | 0.0037  | 0.1451  | 0.0040  | 0.0202  | 0.0016  |         |         |     |     |     |    | 128.8 | 2.4  |     |    |     |
| T0007-9.1  | 338  | 226  | 1.50 | 0.0744  | 0.0037  | 0.2134  | 0.0041  | 0.0208  | 0.0018  |         |         |     |     |     |    | 132.7 | 3.2  |     |    |     |
| T0007-10.1 | 311  | 349  | 0.89 | 0.0509  | 0.0043  | 0.1411  | 0.0046  | 0.0201  | 0.0017  |         |         |     |     |     |    | 128.2 | 2.5  |     |    |     |
| T0007-11.1 | 189  | 253  | 0.75 | 0.0570  | 0.0069  | 0.1620  | 0.0072  | 0.0206  | 0.0018  |         |         |     |     |     |    | 131.2 | 2.8  |     |    |     |
| T0007-12.1 | 99   | 124  | 0.80 | 0.0454  | 0.0130  | 0.1270  | 0.0130  | 0.0204  | 0.0027  |         |         |     |     |     |    | 130.1 | 4.2  |     |    |     |
| T0007-13.1 | 416  | 511  | 0.81 | 0.0540  | 0.0034  | 0.1513  | 0.0038  | 0.0203  | 0.0016  |         |         |     |     |     |    | 129.7 | 2.4  |     |    |     |
| T0007-14.1 | 94   | 147  | 0.64 | 0.0463  | 0.0077  | 0.1410  | 0.0080  | 0.0221  | 0.0020  |         |         |     |     |     |    | 140.7 | 3.2  |     |    |     |
| T0007-15.1 | 271  | 224  | 1.21 | 0.0548  | 0.0094  | 0.1750  | 0.0096  | 0.0231  | 0.0018  |         |         |     |     |     |    | 147.4 | 4.4  |     |    |     |
| T0007-16.1 | 316  | 434  | 0.73 | 0.0553  | 0.0034  | 0.1568  | 0.0038  | 0.0206  | 0.0017  |         |         |     |     |     |    | 131.3 | 2.5  |     |    |     |
|            |      |      |      |         |         |         |         |         |         |         |         |     |     |     |    |       |      |     |    |     |
| T0011-2.1  | 3444 | 4006 | 0.86 | 0.0752  | 0.0021  | 0.1548  | 0.0026  | 0.0149  | 0.0015  |         |         |     |     |     |    | 95.5  | 2.1  |     |    |     |
| T0011-3.1  | 230  | 400  | 0.58 | 0.0580  | 0.0043  | 0.1604  | 0.0046  | 0.0201  | 0.0016  |         |         |     |     |     |    | 128.1 | 2.4  |     |    |     |
| T0011-4.1  | 2536 | 3947 | 0.64 | 0.0511  | 0.0018  | 0.1203  | 0.0023  | 0.0171  | 0.0014  |         |         |     |     |     |    | 109.1 | 1.9  |     |    |     |
| T0011-5.1  | 322  | 373  | 0.86 | 0.0589  | 0.0067  | 0.1720  | 0.0069  | 0.0211  | 0.0016  |         |         |     |     |     |    | 134.8 | 2.9  |     |    |     |
| T0011-6.1  | 243  | 441  | 0.55 | 0.0516  | 0.0037  | 0.1415  | 0.0041  | 0.0199  | 0.0016  |         |         |     |     |     |    | 126.9 | 2.3  |     |    |     |
| T0011-7.1  | 1799 | 3497 | 0.51 | 0.0525  | 0.0012  | 0.1376  | 0.0020  | 0.0190  | 0.0015  |         |         |     |     |     |    | 121.3 | 2.0  |     |    |     |
| T0011-8.1  | 195  | 434  | 0.45 | 0.0490  | 0.0048  | 0.1384  | 0.0050  | 0.0205  | 0.0016  |         |         |     |     |     |    | 130.6 | 2.4  |     |    |     |
| T0011-9.1  | 345  | 396  | 0.87 | 0.0570  | 0.0039  | 0.1571  | 0.0042  | 0.0200  | 0.0017  |         |         |     |     |     |    | 127.7 | 2.5  |     |    |     |
| T0011-10.1 | 345  | 396  | 0.87 | 0.0562  | 0.0039  | 0.2970  | 0.0044  | 0.0384  | 0.0020  |         |         |     |     |     |    | 242.7 | 5.7  |     |    |     |
| T0011-11.1 | 296  | 366  | 0.81 | 0.0618  | 0.0041  | 0.1741  | 0.0045  | 0.0204  | 0.0017  |         |         |     |     |     |    | 130.3 | 2.6  |     |    |     |

M10, Jinhua (Li CL et al., 2014)

|                          |                |                |                 |  |  |                    |                    |                    |                    |  |  |  |  |  |  |                |                |  |  |  |
|--------------------------|----------------|----------------|-----------------|--|--|--------------------|--------------------|--------------------|--------------------|--|--|--|--|--|--|----------------|----------------|--|--|--|
| DY11-155-1-1             | 486            | 246            | 1.98            |  |  | 0.15475            | 0.00289            | 0.02197            | 0.00030            |  |  |  |  |  |  | 140            | 1.9            |  |  |  |
| <del>DY11-155-1-2</del>  | <del>217</del> | <del>124</del> | <del>1.75</del> |  |  | <del>0.18373</del> | <del>0.01226</del> | <del>0.02362</del> | <del>0.00068</del> |  |  |  |  |  |  | <del>150</del> | <del>4.3</del> |  |  |  |
| DY11-155-1-3             | 73             | 77             | 0.95            |  |  | 0.14876            | 0.00770            | 0.02063            | 0.00042            |  |  |  |  |  |  | 132            | 2.7            |  |  |  |
| DY11-155-1-4             | 70             | 71             | 0.99            |  |  | 0.14365            | 0.00668            | 0.02190            | 0.00034            |  |  |  |  |  |  | 140            | 2.1            |  |  |  |
| DY11-155-1-5             | 98             | 76             | 1.29            |  |  | 0.15220            | 0.00456            | 0.02224            | 0.00027            |  |  |  |  |  |  | 142            | 1.7            |  |  |  |
| DY11-155-1-6             | 334            | 248            | 1.35            |  |  | 0.15071            | 0.00570            | 0.02192            | 0.00051            |  |  |  |  |  |  | 140            | 3.2            |  |  |  |
| DY11-155-1-7             | 187            | 100            | 1.86            |  |  | 0.15296            | 0.00593            | 0.02191            | 0.00050            |  |  |  |  |  |  | 140            | 3.2            |  |  |  |
| DY11-155-1-8             | 86             | 83             | 1.04            |  |  | 0.14274            | 0.00701            | 0.02118            | 0.00073            |  |  |  |  |  |  | 135            | 4.6            |  |  |  |
| DY11-155-1-9             | 146            | 95             | 1.54            |  |  | 0.15653            | 0.01021            | 0.02221            | 0.00042            |  |  |  |  |  |  | 142            | 2.6            |  |  |  |
| DY11-155-1-10            | 268            | 148            | 1.81            |  |  | 0.15139            | 0.00285            | 0.02215            | 0.00021            |  |  |  |  |  |  | 141            | 1.3            |  |  |  |
| DY11-155-1-11            | 99             | 85             | 1.17            |  |  | 0.16081            | 0.00463            | 0.02172            | 0.00040            |  |  |  |  |  |  | 138            | 2.5            |  |  |  |
| DY11-155-1-12            | 316            | 172            | 1.84            |  |  | 0.15472            | 0.00297            | 0.02142            | 0.00038            |  |  |  |  |  |  | 137            | 2.4            |  |  |  |
| <del>DY11-155-1-13</del> | <del>54</del>  | <del>55</del>  | <del>0.99</del> |  |  | <del>0.21797</del> | <del>0.01671</del> | <del>0.02205</del> | <del>0.00121</del> |  |  |  |  |  |  | <del>141</del> | <del>7.6</del> |  |  |  |
| DY11-155-1-14            | 83             | 77             | 1.07            |  |  | 0.15882            | 0.00389            | 0.02200            | 0.00029            |  |  |  |  |  |  | 140            | 1.8            |  |  |  |
| DY11-155-1-15            | 249            | 336            | 0.74            |  |  | 0.15198            | 0.00186            | 0.02224            | 0.00023            |  |  |  |  |  |  | 142            | 1.5            |  |  |  |
| DY11-155-1-16            | 52             | 55             | 0.95            |  |  | 0.14814            | 0.01079            | 0.02184            | 0.00042            |  |  |  |  |  |  | 139            | 2.7            |  |  |  |
| DY11-155-1-17            | 55             | 47             | 1.17            |  |  | 0.15336            | 0.00598            | 0.02216            | 0.00036            |  |  |  |  |  |  | 141            | 2.3            |  |  |  |
| DY11-155-1-18            | 82             | 73             | 1.12            |  |  | 0.15823            | 0.00435            | 0.02194            | 0.00030            |  |  |  |  |  |  | 140            | 1.9            |  |  |  |

|               |     |     |      |  |  |         |         |         |         |  |  |     |     |
|---------------|-----|-----|------|--|--|---------|---------|---------|---------|--|--|-----|-----|
| DY11-155-1-19 | 178 | 117 | 1.52 |  |  | 0.16363 | 0.00262 | 0.02221 | 0.00020 |  |  | 142 | 1.2 |
| DY11-155-1-20 | 353 | 180 | 1.96 |  |  | 0.14959 | 0.00217 | 0.02181 | 0.00023 |  |  | 139 | 1.5 |

M11, Yongkang (10ZJ109 from Zhang et al., 2018; another from Li JH et al., 2014)

|               |      |     |      |         |         |             |         |         |         |      |      |       |     |     |
|---------------|------|-----|------|---------|---------|-------------|---------|---------|---------|------|------|-------|-----|-----|
| DY11-120-1-1  | 31   | 26  | 1.19 |         |         | 0.70463     | 0.02535 | 0.02631 | 0.00019 |      |      | 167   | 1.2 |     |
| DY11-120-1-2  | 42   | 33  | 1.27 |         |         | 0.14865     | 0.02162 | 0.02208 | 0.00036 |      |      | 140   | 2.3 |     |
| DY11-120-1-3  | 79   | 74  | 1.06 |         |         | 0.15257     | 0.00103 | 0.02123 | 0.00118 |      |      | 135   | 7.5 |     |
| DY11-120-1-4  | 129  | 93  | 1.38 |         |         | 0.15840     | 0.00461 | 0.02119 | 0.00015 |      |      | 135   | 0.9 |     |
| DY11-120-1-5  | 94   | 88  | 1.08 |         |         | 0.14698     | 0.01055 | 0.02146 | 0.00037 |      |      | 137   | 2.3 |     |
| DY11-120-1-6  | 59   | 50  | 1.16 |         |         | 0.15950     | 0.01944 | 0.02159 | 0.00015 |      |      | 138   | 0.9 |     |
| DY11-120-1-7  | 111  | 51  | 2.20 |         |         | 0.15696     | 0.01213 | 0.02203 | 0.00021 |      |      | 140   | 1.3 |     |
| DY11-120-1-8  | 85   | 63  | 1.35 |         |         | 0.15640     | 0.00642 | 0.02123 | 0.00018 |      |      | 136   | 1.1 |     |
| DY11-120-1-9  | 199  | 121 | 1.65 |         |         | 0.14493     | 0.01038 | 0.02119 | 0.00012 |      |      | 135   | 0.8 |     |
| DY11-120-1-10 | 98   | 49  | 2.01 |         |         | 0.83081     | 0.03321 | 0.02320 | 0.00040 |      |      | 148   | 2.5 |     |
| DY11-120-1-11 | 73   | 45  | 1.63 |         |         | 0.14059     | 0.02460 | 0.02093 | 0.00034 |      |      | 133   | 2.1 |     |
| DY11-120-1-12 | 22   | 27  | 0.82 |         |         | 0.14266     | 0.01750 | 0.02146 | 0.00031 |      |      | 137   | 2.0 |     |
| DY11-120-1-13 | 92   | 77  | 1.21 |         |         | 0.14569     | 0.00904 | 0.02098 | 0.00018 |      |      | 134   | 1.1 |     |
| DY11-120-1-14 | 46   | 39  | 1.18 |         |         | 0.57624     | 0.01669 | 0.02396 | 0.00015 |      |      | 153   | 0.9 |     |
| DY11-120-1-15 | 47   | 36  | 1.33 |         |         | 0.15541     | 0.01530 | 0.02163 | 0.00031 |      |      | 139   | 1.9 |     |
| DY11-120-1-16 | 120  | 45  | 2.69 |         |         | 1.94542     | 0.03537 | 0.03406 | 0.00058 |      |      | 216   | 3.6 |     |
| DY11-120-1-17 | 155  | 137 | 1.13 |         |         | 0.14997     | 0.00632 | 0.02160 | 0.00037 |      |      | 138   | 2.3 |     |
| DY11-120-1-18 | 149  | 60  | 2.48 |         |         | 0.17255     | 0.00143 | 0.01616 | 0.00009 |      |      | 103   | 0.6 |     |
|               |      |     |      |         |         |             |         |         |         |      |      |       |     |     |
| zj47-1.1      | 209  | 133 | 1.62 | 0.14790 | 0.00058 | 0.38500     | 0.00068 | 0.01885 | 0.00036 | 2322 | 100  | 120.4 | 4.3 |     |
| zj47-1.2      | 64   | 74  | 0.9  | 0.11700 | 0.00130 | 0.31700     | 0.00130 | 0.01967 | 0.00026 | 1912 | 230  | 115.7 | 4.7 |     |
| zj47-1.3      | 75   | 80  | 0.97 | 0.09300 | 0.00380 | 0.27000     | 0.00380 | 0.02120 | 0.00048 | 1485 | 720  | 123   | 4.7 |     |
| zj47-1.4      | 56   | 66  | 0.87 | 0.11900 | 0.00330 | 0.33000     | 0.00330 | 0.02045 | 0.00045 | 1934 | 590  | 114.8 | 3.8 |     |
| zj47-1.5      | 52   | 54  | 0.99 | 0.05400 | 0.00940 | 0.14000     | 0.00940 | 0.01920 | 0.00065 | 370  | 2100 | 127.6 | 4.5 |     |
| zj47-1.6      | 49   | 54  | 0.95 | 0.08100 | 0.00550 | 0.22000     | 0.00560 | 0.02010 | 0.00060 | 1210 | 1100 | 119   | 5.7 |     |
| zj47-1.7      | 98   | 105 | 0.96 | 0.04300 | 0.00610 | 0.11500     | 0.00610 | 0.01917 | 0.00035 | -140 | 1500 | 119.6 | 4.1 |     |
| zj47-1.8      | 128  | 87  | 1.51 | 0.22500 | 0.00110 | 0.55900     | 0.00120 | 0.01802 | 0.00043 | 3015 | 170  | 121.6 | 4.4 |     |
| zj47-1.9      | 77   | 87  | 0.91 | 0.04600 | 0.00640 | 0.11900     | 0.00640 | 0.01873 | 0.00041 | 10   | 1500 | 123   | 4.4 |     |
| zj47-1.10     | 48   | 59  | 0.84 | #####   | 0.28000 | 0.01760     | 0.00089 | #####   | 0.00035 | 400  | 2800 | 123   | 3.5 |     |
| zj47-1.11     | 63   | 65  | 1.01 | 0.05500 | 0.00260 | 0.14500     | 0.00260 | 0.01902 | 0.00030 | 424  | 590  | 110.5 | 4.8 |     |
|               |      |     |      |         |         |             |         |         |         |      |      |       |     |     |
| zj47-2.1      | 1071 | 348 | 3.18 | 0.02900 | 0.00500 | 0.06300     | 0.00500 | 0.01601 | 0.00022 | -130 | 160  | 102.4 | 2.3 |     |
| zj47-2.2      | 71   | 60  | 1.21 | 0.11200 | 0.00330 | 0.30000     | 0.00340 | 0.01930 | 0.00051 | 1828 | 610  | 123.2 | 6.4 |     |
| zj47-2.3      | 160  | 110 | 1.51 | 0.11000 | 0.00210 | 0.27500     | 0.00220 | 0.01806 | 0.00041 | 1806 | 390  | 115.4 | 4.8 |     |
| zj47-2.4      | 775  | 429 | 1.87 | 0.05680 | 0.00140 | 0.13400     | 0.00140 | 0.01711 | 0.00018 | 485  | 300  | 109.4 | 2.0 |     |
| zj47-2.5      | 338  | 180 | 1.94 | 0.04700 | 0.00340 | 0.10400     | 0.00340 | 0.01621 | 0.00030 | 34   | 810  | 103.6 | 3.1 |     |
| zj47-2.6      | 201  | 159 | 1.3  | 0.05100 | 0.00720 | 0.11200     | 0.00720 | 0.01593 | 0.00049 | 230  | 1700 | 101.9 | 5.0 |     |
| zj47-2.7      | 149  | 136 | 1.14 | 0.05000 | 0.00220 | 0.11100     | 0.00220 | 0.01590 | 0.00027 | 217  | 500  | 101.7 | 2.7 |     |
| zj47-2.8      | 127  | 72  | 1.82 | 0.14600 | 0.00180 | 0.37800     | 0.00180 | 0.01870 | 0.00038 | 2307 | 300  | 119.5 | 4.6 |     |
| zj47-2.9      | 441  | 247 | 1.84 | 0.06800 | 0.00280 | 0.15600     | 0.00280 | 0.01661 | 0.00029 | 869  | 580  | 106.2 | 3.1 |     |
| zj47-2.10     | 272  | 178 | 1.58 | 0.05600 | 0.00320 | 0.12800     | 0.00330 | 0.01665 | 0.00027 | 437  | 720  | 106.5 | 2.9 |     |
| zj47-2.11     | 366  | 224 | 1.69 | 0.06900 | 0.00260 | 0.16400     | 0.00260 | 0.01719 | 0.00027 | 906  | 530  | 109.8 | 3.0 |     |
| zj47-2.12     | 67   | 69  | 1.01 | 0.17600 | 0.00190 | 0.50000     | 0.00200 | 0.02060 | 0.00050 | 2619 | 320  | 131.5 | 6.6 |     |
|               |      |     |      |         |         |             |         |         |         |      |      |       |     |     |
| zj49-1.1      | 156  | 251 | 0.64 | 0.05300 | 0.00380 | 0.19300     | 0.00380 | 0.02621 | 0.00025 | 348  | 860  | 166.8 | 4.2 |     |
| zj49-1.2      | 369  | 448 | 0.85 | 0.05770 | 0.00090 | 0.16100     | 0.00091 | 0.02028 | 0.00013 | 517  | 200  | 129.4 | 1.7 |     |
| zj49-1.3      | 529  | 575 | 0.95 | 0.05110 | 0.00150 | 0.14300     | 0.00150 | 0.02032 | 0.00014 | 247  | 340  | 129.7 | 1.9 |     |
| zj49-1.4      | 438  | 373 | 1.21 | 0.05200 | 0.00240 | 0.14400     | 0.00240 | 0.02023 | 0.00019 | 267  | 560  | 129.1 | 2.5 |     |
| zj49-1.5      | 367  | 476 | 0.8  | 0.04960 | 0.00096 | 0.14000     | 0.00097 | 0.02041 | 0.00013 | 177  | 220  | 130.2 | 1.7 |     |
| zj49-1.6      | 481  | 534 | 0.93 | 0.04930 | 0.00170 | 0.13800     | 0.00170 | 0.02034 | 0.00015 | 162  | 390  | 129.8 | 1.9 |     |
| zj49-1.7      | 254  | 331 | 0.79 | 0.04820 | 0.00120 | 0.13400     | 0.00120 | 0.02021 | 0.00015 | 109  | 290  | 129   | 1.9 |     |
| zj49-1.8      | 370  | 492 | 0.78 | 0.04450 | 0.00100 | 0.12400     | 0.00100 | 0.02017 | 0.00013 | -81  | 250  | 128.8 | 1.6 |     |
| zj49-1.9      | 517  | 516 | 1.04 | 0.05390 | 0.00088 | 0.14900     | 0.00089 | 0.02002 | 0.00013 | 365  | 200  | 127.8 | 1.6 |     |
| zj49-1.10     | 324  | 390 | 0.86 | 0.04500 | 0.00290 | 0.12900     | 0.00290 | 0.02055 | 0.00020 | -31  | 700  | 131.1 | 2.6 |     |
| zj49-1.11     | 664  | 631 | 1.09 | 0.05800 | 0.00180 | 0.16200     | 0.00180 | 0.02025 | 0.00017 | 537  | 390  | 129.2 | 2.2 |     |
| zj49-1.12     | 838  | 707 | 1.23 | 0.03750 | 0.00130 | 0.10500     | 0.00140 | 0.02025 | 0.00012 | -518 | 360  | 129.3 | 1.6 |     |
| zj49-1.13     | 463  | 499 | 0.96 | 0.04230 | 0.00110 | 0.11800     | 0.00110 | 0.02026 | 0.00013 | -208 | 270  | 129.3 | 1.7 |     |
| zj49-1.14     | 360  | 470 | 0.79 | 0.04800 | 0.00250 | 0.13700     | 0.00260 | 0.02048 | 0.00019 | 123  | 600  | 130.7 | 2.5 |     |
|               |      |     |      |         |         |             |         |         |         |      |      |       |     |     |
| 10ZJ109 01    |      |     | 1.64 | 0.04605 | 0.00938 | 0.09331     | 0.01845 | 0.01470 | 0.00072 | 91   | 17   | 94    | 5.0 | 1.0 |
| 10ZJ109 02    |      |     | 1.69 | 0.06118 | 0.01440 | 0.13191     | 0.03041 | 0.01564 | 0.00074 | 126  | 27   | 100   | 5.0 | 0.8 |
| 10ZJ109 03    |      |     | 1.10 | 0.05436 | 0.00342 | 0.15490     | 0.00890 | 0.02067 | 0.00067 | 146  | 8    | 132   | 4.0 | 0.9 |
| 10ZJ109 04    |      |     | 0.83 | 0.05872 | 0.00845 | 0.15140     | 0.02139 | 0.01870 | 0.00052 | 143  | 19   | 119   | 3.0 | 0.8 |
| 10ZJ109 05    |      |     | 2.13 | 0.05691 | 0.00769 | 0.13323     | 0.01657 | 0.01698 | 0.00098 | 127  | 15   | 109   | 6.0 | 0.9 |
| 10ZJ109 06    |      |     | 1.39 | 0.06076 | 0.00418 | 0.14118     | 0.00874 | 0.01685 | 0.00061 | 134  | 8    | 108   | 4.0 | 0.8 |
| 10ZJ109 07    |      |     | 0.78 | 0.04703 | 0.00405 | 0.11076     | 0.00879 | 0.01708 | 0.00067 | 107  | 8    | 109   | 4.0 | 1.0 |
| 10ZJ109 08    |      |     | 0.99 | 0.04792 | 0.00374 | 0.13926     | 0.01013 | 0.02108 | 0.00073 | 132  | 9    | 134   | 5.0 | 1.0 |
| 10ZJ109 09    |      |     | 1.35 | 0.04605 | 0.00638 | 0.09925     | 0.01188 | 0.01563 | 0.00109 | 96   | 11   | 100   | 7.0 | 1.0 |
| 10ZJ109 10    |      |     | 1.79 | 0.04899 | 0.00337 | 0.11646     | 0.00741 | 0.01724 | 0.00057 | 112  | 7    | 110   | 4.0 | 1.0 |
| 10ZJ109 11    |      |     | 1.15 | 0.05096 | 0.00429 | 0.14440     | 0.01116 | 0.02055 | 0.00081 | 137  | 10   | 131   | 5.0 | 1.0 |
| 10ZJ109 12    |      |     | 2.63 | 0.05961 | 0.00540 | 0.13763     | 0.01126 | 0.01675 | 0.00074 | 131  | 10   | 107   | 5.0 | 0.8 |
| 10ZJ109 13    |      |     | 1.33 | 0.07810 | 0.01183 | 0.18142     | 0.02438 | 0.01685 | 0.00125 | 169  | 21   | 108   | 8.0 | 0.6 |
| 10ZJ109 14    |      |     | 1.12 | 0.05340 | 0.00220 | 0.15636     | 0.00591 | 0.02124 | 0.00054 | 148  | 5    | 135   | 3.0 | 0.9 |
| 10ZJ109 15    |      |     | 0.70 | 0.04958 | 0.00279 | 0.14487     | 0.00755 | 0.02119 | 0.00061 | 137  | 7    | 135   | 4.0 | 1.0 |
| 10ZJ109 16    |      |     | 1.64 | 0.05476 | 0.00497 | 0.11512     | 0.00960 | 0.01525 | 0.00063 | 111  | 9    | 98    | 4.0 | 0.9 |
| 10ZJ109 17    |      |     | 1.49 | 0.05435 | 0.00807 | 0.12537     | 0.01704 | 0.01673 | 0.00107 | 120  | 15   | 107   | 7.0 | 0.9 |
| 10ZJ109 18    |      |     | 2.04 | 0.06172 | 0.00377 | 0.1433535</ |         |         |         |      |      |       |     |     |

|                                                                                                                     |     |     |
|---------------------------------------------------------------------------------------------------------------------|-----|-----|
| ZJ90.1                                                                                                              | 125 | 4.2 |
| ZJ90.2                                                                                                              | 120 | 1.7 |
| ZJ90.3                                                                                                              | 122 | 1.9 |
| ZJ90.4                                                                                                              | 127 | 2.0 |
| ZJ90.5                                                                                                              | 119 | 1.2 |
| ZJ90.6                                                                                                              | 118 | 1.5 |
| ZJ90.7                                                                                                              | 119 | 1.2 |
| ZJ90.8                                                                                                              | 130 | 1.9 |
| ZJ90.9                                                                                                              | 122 | 1.8 |
| ZJ90.10                                                                                                             | 119 | 1.8 |
| ZJ90.11                                                                                                             | 128 | 1.9 |
| ZJ90.12                                                                                                             | 119 | 1.5 |
| ZJ90.13                                                                                                             | 121 | 1.6 |
| ZJ90.14                                                                                                             | 122 | 2.6 |
| ZJ90.15                                                                                                             | 127 | 2.6 |
| ZJ90.16                                                                                                             | 129 | 2.7 |
| ZJ90.17                                                                                                             | 120 | 1.1 |
| ZJ90.18                                                                                                             | 121 | 1.2 |
| ZJ90.19                                                                                                             | 121 | 1.7 |
| ZJ90.20                                                                                                             | 121 | 1.6 |
| ZJ90.21                                                                                                             | 119 | 1.2 |
| ZJ90.22                                                                                                             | 128 | 2.5 |
| ZJ90.23                                                                                                             | 121 | 1.2 |
| ZJ90.24                                                                                                             | 128 | 1.3 |
| ZJ90.25                                                                                                             | 121 | 1.5 |
| ZJ90.26                                                                                                             | 129 | 3.5 |
| ZJ90.27                                                                                                             | 128 | 2.7 |
| ZJ90.28                                                                                                             | 128 | 2.3 |
| ZJ90.29                                                                                                             | 129 | 1.7 |
| ZJ90.30                                                                                                             | 129 | 1.9 |
|                                                                                                                     |     |     |
| ZJ93.1                                                                                                              | 110 | 1.1 |
| ZJ93.2                                                                                                              | 113 | 1.1 |
| ZJ93.3                                                                                                              | 110 | 1.1 |
| ZJ93.4                                                                                                              | 110 | 1.1 |
| ZJ93.5                                                                                                              | 110 | 1.1 |
| ZJ93.6                                                                                                              | 112 | 1.1 |
| ZJ93.7                                                                                                              | 114 | 1.1 |
| ZJ93.8                                                                                                              | 113 | 1.1 |
| ZJ93.9                                                                                                              | 113 | 1.1 |
| ZJ93.10                                                                                                             | 112 | 1.1 |
| ZJ93.11                                                                                                             | 113 | 1.1 |
| ZJ93.12                                                                                                             | 112 | 1.2 |
| ZJ93.13                                                                                                             | 114 | 1.2 |
| ZJ93.14                                                                                                             | 112 | 1.1 |
| ZJ93.15                                                                                                             | 110 | 1.1 |
| ZJ93.16                                                                                                             | 115 | 1.4 |
| ZJ93.17                                                                                                             | 111 | 1.1 |
|                                                                                                                     |     |     |
| WYS08.1                                                                                                             | 113 | 1.3 |
| WYS08.2                                                                                                             | 113 | 1.5 |
| WYS08.3                                                                                                             | 119 | 1.8 |
| WYS08.4                                                                                                             | 115 | 1.7 |
| WYS08.5                                                                                                             | 114 | 1.5 |
| WYS08.6                                                                                                             | 114 | 1.5 |
| WYS08.7                                                                                                             | 118 | 1.6 |
| WYS08.8                                                                                                             | 115 | 1.7 |
| WYS08.9                                                                                                             | 113 | 1.5 |
| WYS08.10                                                                                                            | 110 | 1.4 |
| WYS08.11                                                                                                            | 110 | 1.4 |
| WYS08.12                                                                                                            | 111 | 1.5 |
| WYS08.13                                                                                                            | 115 | 1.8 |
| WYS08.14                                                                                                            | 117 | 2.1 |
| WYS08.15                                                                                                            | 113 | 1.5 |
| WYS08.16                                                                                                            | 118 | 2.0 |
| WYS08.17                                                                                                            | 119 | 2.5 |
| WYS08.18                                                                                                            | 113 | 1.3 |
|                                                                                                                     |     |     |
| WYS08-9.1                                                                                                           | 115 | 1.6 |
| WYS08-9.2                                                                                                           | 115 | 1.8 |
| WYS08-9.3                                                                                                           | 112 | 1.3 |
| WYS08-9.4                                                                                                           | 117 | 1.5 |
| WYS08-9.5                                                                                                           | 112 | 1.5 |
| WYS08-9.6                                                                                                           | 116 | 1.7 |
| WYS08-9.7                                                                                                           | 114 | 1.6 |
| WYS08-9.8                                                                                                           | 115 | 1.6 |
| WYS08-9.9                                                                                                           | 114 | 1.5 |
| WYS08-9.10                                                                                                          | 120 | 1.7 |
| WYS08-9.11                                                                                                          | 113 | 1.5 |
| WYS08-9.12                                                                                                          | 111 | 1.3 |
|                                                                                                                     |     |     |
| M13, Laozhu, Lishui (ZJ66 from Ma et al., 2016; 10ZJ064 from Zhang et al., 2018; and others from Wang et al., 2015) |     |     |
| ZJ66.1                                                                                                              | 115 | 1.7 |
| ZJ66.2                                                                                                              | 120 | 1.8 |
| ZJ66.3                                                                                                              | 121 | 1.9 |

[illegible]

| T3-TW-13-1                                                                  | 46    | 46   | 1.00 | 0.05200 | 0.0270  | 0.15400 | 0.0280  | 0.02140 | 0.0065  |         |         |     |     | 137.0 | 13.0 |     |     |     |    |     |
|-----------------------------------------------------------------------------|-------|------|------|---------|---------|---------|---------|---------|---------|---------|---------|-----|-----|-------|------|-----|-----|-----|----|-----|
| M14, Maonong, Songyang (Liu et al., 2012)                                   |       |      |      |         |         |         |         |         |         |         |         |     |     |       |      |     |     |     |    |     |
| MN01-01                                                                     | 432   | 765  | 0.57 | 0.04897 | 0.00088 | 0.18694 | 0.00343 | 0.02769 | 0.00034 | 0.00819 | 0.00056 | 146 | 43  | 174   | 3    | 176 | 2.0 | 165 | 11 | 1.0 |
| MN01-02                                                                     | 595   | 1034 | 0.58 | 0.05000 | 0.00218 | 0.19079 | 0.00813 | 0.02768 | 0.00051 | 0.00566 | 0.00073 | 195 | 102 | 177   | 7    | 176 | 3.0 | 114 | 15 | 1.0 |
| MN01-03                                                                     | 421   | 733  | 0.57 | 0.04780 | 0.00138 | 0.18378 | 0.00526 | 0.02789 | 0.00039 | 0.00787 | 0.00082 | 89  | 67  | 171   | 5    | 177 | 2.0 | 158 | 16 | 1.0 |
| MN01-04                                                                     | 461   | 796  | 0.58 | 0.05066 | 0.00090 | 0.19357 | 0.00354 | 0.02772 | 0.00034 | 0.00825 | 0.00062 | 225 | 42  | 180   | 3    | 176 | 2.0 | 166 | 12 | 1.0 |
| MN01-05                                                                     | 818   | 1085 | 0.75 | 0.05170 | 0.00099 | 0.19844 | 0.00391 | 0.02785 | 0.00036 | 0.00714 | 0.00055 | 272 | 45  | 184   | 3    | 177 | 2.0 | 144 | 11 | 1.0 |
| MN01-06                                                                     | 749   | 1156 | 0.65 | 0.05012 | 0.00122 | 0.19488 | 0.00480 | 0.02822 | 0.00040 | 0.00588 | 0.00053 | 201 | 58  | 181   | 4    | 179 | 3.0 | 118 | 11 | 1.0 |
| MN01-07                                                                     | 570   | 809  | 0.70 | 0.05028 | 0.00114 | 0.19352 | 0.00436 | 0.02793 | 0.00035 | 0.01012 | 0.00142 | 208 | 54  | 180   | 4    | 178 | 2.0 | 204 | 28 | 1.0 |
| MN01-08                                                                     | 671   | 952  | 0.71 | 0.05031 | 0.00108 | 0.19524 | 0.00418 | 0.02815 | 0.00035 | 0.01086 | 0.00154 | 209 | 51  | 181   | 4    | 179 | 2.0 | 218 | 31 | 1.0 |
| MN01-09                                                                     | 289   | 684  | 0.42 | 0.04973 | 0.00123 | 0.19318 | 0.00475 | 0.02818 | 0.00037 | 0.01052 | 0.00163 | 182 | 59  | 179   | 4    | 179 | 2.0 | 212 | 33 | 1.0 |
| MN01-10                                                                     | 571   | 910  | 0.63 | 0.04974 | 0.00106 | 0.19620 | 0.00420 | 0.02861 | 0.00036 | 0.00969 | 0.00127 | 183 | 51  | 182   | 4    | 182 | 2.0 | 195 | 25 | 1.0 |
| MN01-11                                                                     | 513   | 950  | 0.54 | 0.05003 | 0.00143 | 0.19234 | 0.00550 | 0.02788 | 0.00042 | 0.00602 | 0.00047 | 196 | 68  | 179   | 5    | 177 | 3.0 | 121 | 9  | 1.0 |
| MN01-12                                                                     | 457   | 660  | 0.69 | 0.04905 | 0.00192 | 0.19009 | 0.00720 | 0.02811 | 0.00044 | 0.01016 | 0.00187 | 150 | 91  | 177   | 6    | 179 | 3.0 | 204 | 37 | 1.0 |
| MN01-13                                                                     | 156   | 319  | 0.49 | 0.04972 | 0.00135 | 0.19185 | 0.00516 | 0.02799 | 0.00037 | 0.00877 | 0.00073 | 182 | 65  | 178   | 4    | 178 | 2.0 | 176 | 15 | 1.0 |
| MN01-14                                                                     | 570   | 1093 | 0.52 | 0.05004 | 0.00193 | 0.19363 | 0.00733 | 0.02807 | 0.00049 | 0.00458 | 0.00052 | 197 | 91  | 180   | 6    | 178 | 3.0 | 92  | 10 | 1.0 |
| MN01-15                                                                     | 222   | 515  | 0.43 | 0.04924 | 0.00192 | 0.18969 | 0.00727 | 0.02794 | 0.00046 | 0.00543 | 0.00055 | 159 | 92  | 176   | 6    | 178 | 3.0 | 109 | 11 | 1.0 |
| MN01-16                                                                     | 556   | 1107 | 0.50 | 0.04920 | 0.00110 | 0.18747 | 0.00424 | 0.02764 | 0.00038 | 0.00618 | 0.00051 | 157 | 54  | 174   | 4    | 176 | 2.0 | 125 | 10 | 1.0 |
| MN01-17                                                                     | 828   | 1095 | 0.76 | 0.05042 | 0.00086 | 0.19220 | 0.00333 | 0.02765 | 0.00033 | 0.00775 | 0.00068 | 214 | 40  | 179   | 3    | 176 | 2.0 | 156 | 14 | 1.0 |
| MN01-18                                                                     | 821   | 1217 | 0.67 | 0.04999 | 0.00104 | 0.19013 | 0.00402 | 0.02759 | 0.00037 | 0.00685 | 0.00063 | 195 | 49  | 177   | 3    | 175 | 2.0 | 138 | 13 | 1.0 |
| MN01-19                                                                     | 308   | 511  | 0.60 | 0.04958 | 0.00305 | 0.18972 | 0.01109 | 0.02779 | 0.00059 | 0.00728 | 0.00209 | 175 | 141 | 176   | 9    | 177 | 4.0 | 147 | 42 | 1.0 |
| MN01-20                                                                     | 562   | 1009 | 0.56 | 0.04824 | 0.00200 | 0.18677 | 0.00757 | 0.02807 | 0.00050 | 0.00652 | 0.00112 | 111 | 94  | 174   | 6    | 178 | 3.0 | 131 | 22 | 1.0 |
| MN01-21                                                                     | 529   | 729  | 0.73 | 0.05227 | 0.00218 | 0.19836 | 0.00787 | 0.02754 | 0.00046 | 0.00749 | 0.00154 | 297 | 98  | 184   | 7    | 175 | 3.0 | 151 | 31 | 1.0 |
| M15, Ehuling Formation in southern Jiangshan, Zhejiang (Zhang et al., 2009) |       |      |      |         |         |         |         |         |         |         |         |     |     |       |      |     |     |     |    |     |
| 1.1                                                                         | 680   | 653  | 1.08 | 0.05250 | 0.00430 |         |         | 0.04360 | 0.00220 |         |         |     |     | 144.7 | 3.3  |     |     |     |    |     |
| 2.1                                                                         | 307   | 506  | 0.63 | 0.02250 | 0.00500 |         |         | 0.02888 | 0.00230 |         |         |     |     | 186.2 | 5.6  |     |     |     |    |     |
| 3.1                                                                         | 383   | 404  | 0.98 | 0.07500 | 0.02200 |         |         | 0.04340 | 0.00240 |         |         |     |     | 144.8 | 3.5  |     |     |     |    |     |
| 4.1                                                                         | 301   | 336  | 0.93 | 0.07380 | 0.00820 |         |         | 0.04420 | 0.00240 |         |         |     |     | 137.7 | 4.1  |     |     |     |    |     |
| 5.1                                                                         | 257   | 424  | 0.63 | 0.06680 | 0.01100 |         |         | 0.04630 | 0.00230 |         |         |     |     | 133.5 | 3.5  |     |     |     |    |     |
| 5.1                                                                         | 381   | 513  | 0.77 | 0.07790 | 0.00790 |         |         | 0.04500 | 0.00230 |         |         |     |     | 137.6 | 3.3  |     |     |     |    |     |
| 7.1                                                                         | 355   | 356  | 1.03 | 0.04240 | 0.00420 |         |         | 0.04510 | 0.00240 |         |         |     |     | 139.7 | 3.4  |     |     |     |    |     |
| 8.1                                                                         | 341   | 297  | 1.18 | 0.08850 | 0.01000 |         |         | 0.04340 | 0.00370 |         |         |     |     | 139.1 | 5.4  |     |     |     |    |     |
| 9.1                                                                         | 732   | 679  | 1.11 | 0.06140 | 0.00940 |         |         | 0.04490 | 0.00220 |         |         |     |     | 140.9 | 3.3  |     |     |     |    |     |
| 10.1                                                                        | 11489 | 6778 | 1.75 | 0.06450 | 0.00210 |         |         | 0.04005 | 0.00210 |         |         |     |     | 156.3 | 3.3  |     |     |     |    |     |
| 11.1                                                                        | 454   | 452  | 1.04 | 0.05320 | 0.00860 |         |         | 0.04610 | 0.00230 |         |         |     |     | 136.3 | 3.2  |     |     |     |    |     |
| 12.1                                                                        | 527   | 514  | 1.06 | 0.05170 | 0.01100 |         |         | 0.04600 | 0.00230 |         |         |     |     | 136.8 | 3.1  |     |     |     |    |     |
| 13.1                                                                        | 323   | 465  | 0.72 | 0.06360 | 0.00610 |         |         | 0.04370 | 0.00230 |         |         |     |     | 143.6 | 3.6  |     |     |     |    |     |
| 14.1                                                                        | 443   | 502  | 0.91 | 0.05790 | 0.00380 |         |         | 0.04500 | 0.00280 |         |         |     |     | 139.2 | 4.0  |     |     |     |    |     |
| 15.1                                                                        | 429   | 537  | 0.83 | 0.04520 | 0.00590 |         |         | 0.04690 | 0.00230 |         |         |     |     | 134.8 | 3.0  |     |     |     |    |     |
| 16.1                                                                        | 455   | 553  | 0.85 | 0.05950 | 0.01000 |         |         | 0.04660 | 0.00230 |         |         |     |     | 136.1 | 3.1  |     |     |     |    |     |
| 17.1                                                                        | 553   | 478  | 1.19 | 0.06490 | 0.00980 |         |         | 0.04610 | 0.00230 |         |         |     |     | 134.4 | 3.2  |     |     |     |    |     |



|    |               |      |      |      |         |         |         |         |         |         |         |         |      |      |     |      |    |      |      |      |     |     |
|----|---------------|------|------|------|---------|---------|---------|---------|---------|---------|---------|---------|------|------|-----|------|----|------|------|------|-----|-----|
|    | 1107-03-8     | 653  | 115  | 5.69 | 0.04865 | 0.00742 | 0.15244 | 0.02304 | 0.02272 | 0.00057 | 0.00626 | 0.00189 | 0.03 | 131  | 295 | 144  | 20 | 145  | 4.0  | 126  | 38  | 1.0 |
|    | 1107-03-9     | 1117 | 443  | 2.52 | 0.04863 | 0.00259 | 0.13993 | 0.00739 | 0.02087 | 0.00034 | 0.00601 | 0.00185 | 0.13 | 130  | 121 | 133  | 7  | 133  | 2.0  | 121  | 37  | 1.0 |
|    | 1107-03-10    | 3927 | 1754 | 2.24 | 0.04825 | 0.00128 | 0.14228 | 0.00383 | 0.02139 | 0.00031 | 0.00391 | 0.00070 | 0.30 | 112  | 63  | 135  | 3  | 136  | 2.0  | 79   | 14  | 1.0 |
|    | 1107-03-11    | 1946 | 791  | 2.46 | 0.04999 | 0.00227 | 0.15348 | 0.00704 | 0.02229 | 0.00037 | 0.00914 | 0.00929 | 0.21 | 195  | 106 | 145  | 6  | 142  | 2.0  | 184  | 186 | 1.0 |
|    | 1107-03-12    | 4646 | 1879 | 2.47 | 0.04851 | 0.00128 | 0.14874 | 0.00398 | 0.02224 | 0.00032 | 0.00276 | 0.00046 | 0.29 | 124  | 63  | 141  | 4  | 142  | 2.0  | 56   | 9   | 1.0 |
|    | 1107-03-13    | 5354 | 1875 | 2.86 | 0.04676 | 0.00126 | 0.14235 | 0.00387 | 0.02208 | 0.00032 | 0.00251 | 0.00034 | 0.28 | 37   | 58  | 135  | 3  | 141  | 2.0  | 51   | 7   | 1.0 |
|    | 1107-03-14    | 2936 | 1457 | 2.01 | 0.04751 | 0.00142 | 0.13768 | 0.00414 | 0.02102 | 0.00031 | 0.00439 | 0.00111 | 0.26 | 75   | 67  | 131  | 4  | 134  | 2.0  | 89   | 22  | 1.0 |
|    | 1107-03-15    | 5696 | 1914 | 2.98 | 0.04737 | 0.00143 | 0.14532 | 0.00439 | 0.02225 | 0.00033 | 0.00522 | 0.00151 | 0.25 | 68   | 68  | 138  | 4  | 142  | 2.0  | 105  | 30  | 1.0 |
| E4 | 1107-04-1     | 1916 | 420  | 4.56 | 0.04942 | 0.00246 | 0.14214 | 0.00700 | 0.02085 | 0.00035 | 0.00570 | 0.00104 | 0.14 | 168  | 115 | 135  | 6  | 133  | 2.0  | 115  | 21  | 1.0 |
|    | 1107-04-2     | 4245 | 1479 | 2.87 | 0.05092 | 0.00109 | 0.15096 | 0.00341 | 0.02149 | 0.00031 | 0.00319 | 0.00026 | 0.40 | 237  | 51  | 143  | 3  | 137  | 2.0  | 64   | 5   | 1.0 |
|    | 1107-04-3     | 5108 | 1610 | 3.17 | 0.04965 | 0.00167 | 0.14410 | 0.00483 | 0.02105 | 0.00033 | 0.00680 | 0.00208 | 0.23 | 179  | 80  | 137  | 4  | 134  | 2.0  | 137  | 42  | 1.0 |
|    | 1107-04-4     | 5730 | 1673 | 3.43 | 0.05025 | 0.00152 | 0.14777 | 0.00450 | 0.02132 | 0.00032 | 0.00680 | 0.00206 | 0.26 | 207  | 72  | 140  | 4  | 136  | 2.0  | 137  | 41  | 1.0 |
|    | 1107-04-5     | 5182 | 1768 | 2.93 | 0.05009 | 0.00150 | 0.14721 | 0.00442 | 0.02131 | 0.00032 | 0.00599 | 0.00151 | 0.26 | 199  | 71  | 139  | 4  | 136  | 2.0  | 121  | 30  | 1.0 |
|    | 1107-04-6     | 574  | 301  | 1.90 | 0.05292 | 0.00359 | 0.14857 | 0.00994 | 0.02036 | 0.00039 | 0.00823 | 0.00288 | 0.09 | 325  | 157 | 141  | 9  | 130  | 2.0  | 166  | 58  | 0.9 |
|    | 1107-04-7     | 841  | 346  | 2.43 | 0.04822 | 0.00248 | 0.13654 | 0.00698 | 0.02054 | 0.00034 | 0.00272 | 0.00026 | 0.14 | 110  | 116 | 130  | 6  | 131  | 2.0  | 55   | 5   | 1.0 |
|    | 1107-04-8     | 659  | 254  | 2.60 | 0.04799 | 0.00363 | 0.13589 | 0.01013 | 0.02054 | 0.00040 | 0.00775 | 0.00242 | 0.07 | 99   | 170 | 129  | 9  | 131  | 3.0  | 156  | 49  | 1.0 |
|    | 1107-04-9     | 2038 | 821  | 2.48 | 0.04969 | 0.00145 | 0.13798 | 0.00410 | 0.02014 | 0.00030 | 0.00216 | 0.00019 | 0.29 | 181  | 70  | 131  | 4  | 129  | 2.0  | 44   | 4   | 1.0 |
|    | 1107-04-10    | 960  | 132  | 7.28 | 0.05441 | 0.00578 | 0.14599 | 0.01536 | 0.01946 | 0.00042 | 0.00298 | 0.00040 | 0.06 | 388  | 242 | 138  | 14 | 124  | 3.0  | 60   | 8   | 0.9 |
|    | 1107-04-11    | 5098 | 1478 | 3.45 | 0.04749 | 0.00126 | 0.13494 | 0.00365 | 0.02061 | 0.00031 | 0.00250 | 0.00028 | 0.31 | 74   | 61  | 129  | 3  | 132  | 2.0  | 50   | 6   | 1.0 |
|    | 1107-04-12    | 245  | 87   | 2.82 | 0.04698 | 0.00910 | 0.13055 | 0.02512 | 0.02017 | 0.00056 | 0.00655 | 0.00292 | 0.03 | 48   | 338 | 125  | 23 | 129  | 4.0  | 132  | 59  | 1.0 |
|    | 1107-04-13    | 2883 | 1035 | 2.78 | 0.04868 | 0.00172 | 0.13413 | 0.00470 | 0.01999 | 0.00031 | 0.00394 | 0.00092 | 0.20 | 132  | 82  | 128  | 4  | 128  | 2.0  | 79   | 19  | 1.0 |
|    | 1107-04-14    | 238  | 52   | 4.61 | 0.08334 | 0.01448 | 0.21440 | 0.03669 | 0.01866 | 0.00064 | 0.00254 | 0.00041 | 0.02 | 1277 | 368 | 197  | 31 | 119  | 4.0  | 51   | 8   | 0.6 |
|    | 1107-04-15    | 528  | 205  | 2.58 | 0.05188 | 0.00453 | 0.14418 | 0.01242 | 0.02016 | 0.00042 | 0.00591 | 0.00256 | 0.06 | 280  | 200 | 137  | 11 | 129  | 3.0  | 119  | 51  | 0.9 |
| E5 | 13103-03zk-01 | 7525 | 1404 | 5.36 | 0.05661 | 0.00174 | 0.16957 | 0.00514 | 0.02172 | 0.00032 | #####   | 0.02294 | 0.21 | 476  | 41  | 159  | 4  | 139  | 2.0  | -340 | 472 | 0.9 |
|    | 13103-03zk-02 | 5569 | 1369 | 4.07 | 0.05187 | 0.00131 | 0.15588 | 0.00394 | 0.02180 | 0.00032 | 0.00691 | 0.00362 | 0.29 | 280  | 32  | 147  | 3  | 139  | 2.0  | 139  | 73  | 0.9 |
|    | 13103-03zk-03 | 1679 | 577  | 2.91 | 0.04982 | 0.00303 | 0.15046 | 0.00901 | 0.02190 | 0.00038 | #####   | 0.09961 | 0.09 | 187  | 105 | 142  | 8  | 140  | 2.0  | -646 | ### | 1.0 |
|    | 13103-03zk-04 | 1182 | 546  | 2.16 | 0.06681 | 0.00135 | 1.25325 | 0.02557 | 0.13606 | 0.00203 | 0.03105 | 0.01097 | 0.38 | 832  | 20  | 825  | 12 | 822  | 12.0 | 618  | 215 | 1.0 |
|    | 13103-03zk-05 | 3698 | 1056 | 3.50 | 0.05630 | 0.00215 | 0.17229 | 0.00650 | 0.02220 | 0.00036 | 0.03230 | 0.10599 | 0.19 | 464  | 55  | 161  | 6  | 142  | 2.0  | 643  | ### | 0.9 |
|    | 13103-03zk-06 | 4719 | 1237 | 3.82 | 0.05194 | 0.00158 | 0.15969 | 0.00485 | 0.02230 | 0.00035 | 0.00604 | 0.00328 | 0.26 | 283  | 41  | 150  | 4  | 142  | 2.0  | 122  | 66  | 0.9 |
|    | 13103-03zk-07 | 5782 | 1331 | 4.34 | 0.05402 | 0.00273 | 0.16555 | 0.00817 | 0.02222 | 0.00045 | 0.00183 | 0.00042 | 0.15 | 372  | 75  | 156  | 7  | 142  | 3.0  | 37   | 8   | 0.9 |
|    | 13103-03zk-08 | 5038 | 1577 | 3.19 | 0.05079 | 0.00218 | 0.16486 | 0.00698 | 0.02354 | 0.00044 | 0.00245 | 0.00074 | 0.19 | 231  | 63  | 155  | 6  | 150  | 3.0  | 49   | 15  | 1.0 |
|    | 13103-03zk-09 | 3539 | 830  | 4.27 | 0.04897 | 0.00187 | 0.14752 | 0.00560 | 0.02185 | 0.00033 | 0.07717 | 0.63703 | 0.18 | 146  | 61  | 140  | 5  | 139  | 2.0  | 1503 | ### | 1.0 |
|    | 13103-03zk-10 | 1503 | 638  | 2.35 | 0.04901 | 0.00221 | 0.14774 | 0.00659 | 0.02186 | 0.00034 | 0.03737 | 0.13758 | 0.14 | 148  | 75  | 140  | 6  | 139  | 2.0  | 742  | ### | 1.0 |
|    | 13103-03zk-11 | 2495 | 899  | 2.78 | 0.04986 | 0.00228 | 0.15103 | 0.00682 | 0.02197 | 0.00039 | 0.00392 | 0.00164 | 0.16 | 188  | 72  | 143  | 6  | 140  | 2.0  | 79   | 33  | 1.0 |
|    | 13103-03zk-12 | 688  | 161  | 4.28 | 0.09450 | 0.00268 | 3.44786 | 0.09738 | 0.26457 | 0.00393 | 0.20606 | 0.39685 | 0.26 | 1518 | 31  | 1515 | 22 | 1513 | 20.0 | 3787 | ### | 1.0 |
|    | 13103-03zk-13 | 3348 | 1044 | 3.21 | 0.05430 | 0.00182 | 0.16402 | 0.00547 | 0.02191 | 0.00033 | 0.01019 | 0.01022 | 0.21 | 384  | 48  | 154  | 5  | 140  | 2.0  | 205  | 204 | 0.9 |
|    | 13103-03zk-14 | 3698 | 1176 | 3.14 | 0.05292 | 0.00191 | 0.15953 | 0.00576 | 0.02186 | 0.00036 | 0.00559 | 0.00366 | 0.23 | 325  | 52  | 150  | 5  | 139  | 2.0  | 113  | 74  | 0.9 |
|    | 13103-03zk-15 | 472  | 187  | 2.52 | 0.10927 | 0.00397 | 4.81251 | 0.17402 | 0.31936 | 0.00581 | 0.04662 | 0.02221 | 0.24 | 1787 | 40  | 1787 | 30 | 1787 | 28.0 | 921  | 429 | 1.0 |

L6, Southern Datianchenjia of Guixi county in Xinjiang Basin

|    |               |      |     |      |         |         |         |         |         |         |         |         |      |      |     |     |    |     |     |     |     |     |
|----|---------------|------|-----|------|---------|---------|---------|---------|---------|---------|---------|---------|------|------|-----|-----|----|-----|-----|-----|-----|-----|
| F1 | 1108-04-1     | 1534 | 447 | 3.43 | 0.04739 | 0.00232 | 0.13695 | 0.00670 | 0.02097 | 0.00034 | 0.00238 | 0.00026 | 0.16 | 69   | 108 | 130 | 6  | 134 | 2.0 | 48  | 5   | 1.0 |
|    | 1108-04-2     | 2471 | 475 | 5.20 | 0.04789 | 0.00229 | 0.14301 | 0.00684 | 0.02167 | 0.00035 | 0.00175 | 0.00015 | 0.17 | 94   | 107 | 136 | 6  | 138 | 2.0 | 35  | 3   | 1.0 |
|    | 1108-04-3     | 1452 | 388 | 3.74 | 0.04798 | 0.00264 | 0.14207 | 0.00782 | 0.02148 | 0.00035 | 0.00444 | 0.00088 | 0.15 | 98   | 123 | 135 | 7  | 137 | 2.0 | 90  | 18  | 1.0 |
|    | 1108-04-4     | 801  | 269 | 2.97 | 0.04951 | 0.00405 | 0.14334 | 0.01165 | 0.02100 | 0.00038 | 0.00545 | 0.00143 | 0.08 | 172  | 186 | 136 | 10 | 134 | 2.0 | 110 | 29  | 1.0 |
|    | 1108-04-5     | 619  | 244 | 2.54 | 0.04682 | 0.00407 | 0.13633 | 0.01177 | 0.02112 | 0.00040 | 0.00218 | 0.00029 | 0.08 | 40   | 192 | 130 | 11 | 135 | 3.0 | 44  | 6   | 1.0 |
|    | 1108-04-6     | 1812 | 415 | 4.37 | 0.04776 | 0.00253 | 0.14117 | 0.00747 | 0.02144 | 0.00035 | 0.00276 | 0.00039 | 0.15 | 87   | 118 | 134 | 7  | 137 | 2.0 | 56  | 8   | 1.0 |
|    | 1108-04-7     | 1460 | 374 | 3.90 | 0.04551 | 0.00273 | 0.13633 | 0.00814 | 0.02174 | 0.00038 | 0.00157 | 0.00015 | 0.13 | -28  | 131 | 130 | 7  | 139 | 2.0 | 32  | 3   | 1.1 |
|    | 1108-04-8     | 321  | 137 | 2.34 | 0.04883 | 0.00713 | 0.14566 | 0.02115 | 0.02164 | 0.00050 | 0.00602 | 0.00225 | 0.04 | 140  | 293 | 138 | 19 | 138 | 3.0 | 121 | 45  | 1.0 |
|    | 1108-04-9     | 1228 | 296 | 4.15 | 0.04767 | 0.00368 | 0.14212 | 0.01093 | 0.02162 | 0.00040 | 0.00562 | 0.00218 | 0.10 | 83   | 173 | 135 | 10 | 138 | 3.0 | 113 | 44  | 1.0 |
|    | 1108-04-10    | 1270 | 314 | 4.05 | 0.04667 | 0.00295 | 0.13815 | 0.00870 | 0.02147 | 0.00037 | 0.00183 | 0.00020 | 0.12 | 32   | 139 | 131 | 8  | 137 | 2.0 | 37  | 4   | 1.0 |
|    | 1108-04-11    | 3466 | 851 | 4.07 | 0.04883 | 0.00196 | 0.14300 | 0.00580 | 0.02123 | 0.00034 | 0.00516 | 0.00176 | 0.22 | 140  | 93  | 136 | 5  | 135 | 2.0 | 104 | 35  | 1.0 |
|    | 1108-04-12    | 3215 | 745 | 4.31 | 0.04754 | 0.00175 | 0.14389 | 0.00534 | 0.02195 | 0.00035 | 0.00232 | 0.00031 | 0.23 | 76   | 82  | 137 | 5  | 140 | 2.0 | 47  | 6   | 1.0 |
|    | 1108-04-13    | 1718 | 504 | 3.41 | 0.04835 | 0.00239 | 0.14286 | 0.00707 | 0.02142 | 0.00036 | 0.00297 | 0.00056 | 0.17 | 116  | 112 | 136 | 6  | 137 | 2.0 | 60  | 11  | 1.0 |
|    | 1108-04-14    | 385  | 171 | 2.25 | 0.04814 | 0.00553 | 0.14326 | 0.01637 | 0.02157 | 0.00044 | 0.00469 | 0.00139 | 0.06 | 106  | 242 | 136 | 15 | 138 | 3.0 | 95  | 28  | 1.0 |
|    | 1108-04-15    | 888  | 351 | 2.53 | 0.04782 | 0.00273 | 0.14160 | 0.00806 | 0.02147 | 0.00036 | 0.00206 | 0.00028 | 0.14 | 90   | 127 | 134 | 7  | 137 | 2.0 | 42  | 6   | 1.0 |
| F2 | 1109-05-1     | 371  | 95  | 3.91 | 0.04501 | 0.00852 | 0.12908 | 0.02426 | 0.02080 | 0.00060 | 0.01114 | 0.00459 | 0.03 | -19  | 306 | 123 | 22 | 133 | 4.0 | 224 | 92  | 1.1 |
|    | 1109-05-2     | 1195 | 272 | 4.40 | 0.04687 | 0.00284 | 0.13132 | 0.00793 | 0.02032 | 0.00035 | 0.00405 | 0.00052 | 0.13 | 43   | 133 | 125 | 7  | 130 | 2.0 | 82  | 10  | 1.0 |
|    | 1109-05-3     | 943  | 219 | 4.30 | 0.09009 | 0.00597 | 0.27614 | 0.01745 | 0.02223 | 0.00059 | 0.00116 | 0.00007 | 0.09 | 1427 | 130 | 248 | 14 | 142 | 4.0 | 23  | 1   | 0.6 |
|    | 1109-05-4     | 1070 | 231 | 4.63 | 0.04636 | 0.00293 | 0.13023 | 0.00820 | 0.02037 | 0.00036 | 0.00196 | 0.00013 | 0.13 | 16   | 139 | 124 | 7  | 130 | 2.0 | 40  | 3   | 1.0 |
|    | 1109-05-5     | 987  | 243 | 4.07 | 0.05165 | 0.00309 | 0.14493 | 0.00861 | 0.02035 | 0.00036 | 0.00399 | 0.00056 | 0.13 | 270  | 139 | 137 | 8  | 130 | 2.0 | 80  | 11  | 0.9 |
|    | 1109-05-6     | 1230 | 293 | 4.19 | 0.04437 | 0.00383 | 0.12503 | 0.01062 | 0.02044 | 0.00049 | 0.00091 | 0.00006 | 0.08 | -51  | 174 | 120 | 10 | 130 | 3.0 | 18  | 1   | 1.1 |
|    | 1109-05-7     | 305  | 87  | 3.49 | 0.04719 | 0.00687 | 0.13481 | 0.01951 | 0.02072 | 0.00049 | 0.00205 | 0.00019 | 0.05 | 59   | 273 | 128 | 17 | 132 | 3.0 | 41  | 4   | 1.0 |
|    | 1109-05-8     | 245  | 66  | 3.72 | 0.05343 | 0.01046 | 0.14290 | 0.02776 | 0.01940 | 0.00058 | 0.00796 | 0.00308 | 0.03 | 347  | 387 | 136 | 25 | 124 | 4.0 | 160 | 62  | 0.9 |
|    | 1109-05-9     | 420  | 121 | 3.47 | 0.04473 | 0.00714 | 0.12973 | 0.02046 | 0.02104 | 0.00062 | 0.00135 | 0.00011 | 0.03 | -33  | 267 | 124 | 18 | 134 | 4.0 | 27  | 2   | 1.1 |
|    | 1109-05-10    | 442  | 140 | 3.15 | 0.09553 | 0.00839 | 0.28001 | 0.02350 | 0.02126 | 0.00067 | 0.00152 | 0.00014 | 0.06 | 1539 | 171 | 251 | 19 | 136 | 4.0 | 31  | 3   | 0.5 |
|    | 1109-05-11    | 1329 | 386 | 3.45 | 0.04558 | 0.00208 | 0.13330 | 0.00608 | 0.02121 | 0.00036 | 0.00194 | 0.00015 | 0.18 | -24  | 97  | 127 | 5  | 135 | 2.0 | 39  | 3   | 1.1 |
|    | 1109-05-12    | 727  | 169 | 4.30 | 0.06015 | 0.00392 | 0.18152 | 0.01173 | 0.02189 | 0.00042 | 0.00277 | 0.00030 | 0.12 | 609  | 145 | 169 | 10 | 140 | 3.0 | 56  | 6   | 0.8 |
|    | 1109-05-13    | 1131 | 276 | 4.10 | 0.04378 | 0.00265 | 0.12576 | 0.00756 | 0.02083 | 0.00038 | 0.00187 | 0.00016 | 0.13 | -82  | 133 | 120 | 7  | 133 | 2.0 | 38  | 3   | 1.1 |
|    | 1109-05-14    | 530  | 133 | 3.98 | 0.04709 | 0.00473 | 0.13722 | 0.01370 | 0.02114 | 0.00044 | 0.00270 | 0.00031 | 0.08 | 54   | 218 | 131 | 12 | 135 | 3.0 | 54  | 6   | 1.0 |
|    | 1109-05-15    | 1576 | 346 | 4.55 | 0.08705 | 0.00287 | 0.26621 | 0.00874 | 0.02218 | 0.00038 | 0.00247 | 0.00022 | 0.25 | 1362 | 65  | 240 | 7  | 141 | 2.0 | 50  | 4   | 0.6 |
| F3 | 13104-01zk-01 | 2435 | 653 | 3.73 | 0.05077 | 0.00196 | 0.15194 | 0.00582 | 0.02171 | 0.00034 | 0.00863 | 0.00266 | 0.19 | 230  | 59  | 144 | 5  | 138 | 2.0 | 174 | 53  | 1.0 |
|    | 13104-01zk-02 | 685  | 302 | 2.27 | 0.05862 | 0.00227 | 0.65331 | 0.02480 | 0.08084 | 0.00139 | 0.03016 | 0.01262 | 0.18 | 553  | 53  | 511 | 15 | 501 | 8.0 | 601 | 248 | 1.0 |
|    | 13104-01zk-03 | 2178 | 602 | 3.62 | 0.04870 | 0.00240 | 0.14400 | 0.00701 | 0.02145 | 0.00036 | 0.00810 | 0.00251 | 0.14 | 133  | 81  | 137 | 6  | 137 | 2.0 | 163 | 50  | 1.0 |
|    | 13104-01zk-04 | 1317 | 514 | 2.56 | 0.04375 | 0.00238 | 0.13220 | 0.00713 | 0.02192 | 0.00036 | 0.00871 | 0.00287 | 0.12 | -84  | 86  | 126 | 6  | 140 | 2.0 | 175 | 58  | 1.1 |
|    | 13104-01zk-05 | 1138 | 341 | 3.34 | 0.04884 | 0.00315 | 0.14635 | 0.00936 | 0.02173 | 0.00038 | 0.00592 | 0.00113 | 0.11 | 140  | 111 | 139 | 8  | 139 | 2.0 | 119 | 23  | 1.0 |
|    | 13104-01zk-06 | 981  | 397 | 2.47 | 0.05102 | 0.00291 | 0.15317 | 0.00864 | 0.02178 | 0.00037 | 0.00746 | 0.00221 | 0.11 | 242  | 99  | 145 | 8  | 139 | 2.0 | 150 | 44  | 1.0 |
|    | 13104-01zk-07 | 2042 | 663 | 3.08 | 0.04907 | 0.00191 | 0.14757 | 0.00570 | 0.02182 | 0.00036 | 0.00640 | 0.00148 | 0.20 | 151  | 60  | 140 | 5  | 139 | 2.0 | 129 | 30  | 1.0 |
|    | 13104-01zk-08 | 1056 | 359 | 2.94 | 0.04891 | 0.00357 | 0.14884 | 0.01073 | 0.02208 | 0.00041 | 0.00681 | 0.00228 | 0.08 | 144  | 127 | 141 | 9  | 141 | 3.0 | 137 | 46  | 1.0 |
|    | 13104-01zk-09 | 2427 | 736 | 3.30 | 0.04994 | 0.00215 | 0.14523 | 0.00616 | 0.02110 | 0.00035 | 0.00748 | 0.00280 | 0.16 | 192  | 68  | 138 | 5  | 135 | 2.0 | 151 | 56  | 1.0 |
|    | 13104-01zk-10 | 2763 | 698 | 3.96 | 0.04974 | 0.00210 | 0.14184 | 0.00590 | 0.02069 | 0.00034 | 0.00651 | 0.00213 | 0.16 | 183  | 66  | 135 | 5  | 132 | 2.0 | 131 | 43  | 1.0 |

|               |      |     |      |         |         |         |         |         |         |         |         |      |     |     |     |    |     |     |     |    |     |
|---------------|------|-----|------|---------|---------|---------|---------|---------|---------|---------|---------|------|-----|-----|-----|----|-----|-----|-----|----|-----|
| 13104-01zk-11 | 3526 | 837 | 4.21 | 0.04875 | 0.00247 | 0.15501 | 0.00772 | 0.02306 | 0.00045 | 0.00431 | 0.00094 | 0.15 | 136 | 78  | 146 | 7  | 147 | 3.0 | 87  | 19 | 1.0 |
| 13104-01zk-12 | 2283 | 742 | 3.08 | 0.04849 | 0.00184 | 0.14749 | 0.00554 | 0.02206 | 0.00036 | 0.00574 | 0.00143 | 0.19 | 123 | 58  | 140 | 5  | 141 | 2.0 | 116 | 29 | 1.0 |
| 13104-01zk-13 | 3194 | 754 | 4.24 | 0.04895 | 0.00223 | 0.15041 | 0.00674 | 0.02228 | 0.00039 | 0.00628 | 0.00221 | 0.15 | 145 | 72  | 142 | 6  | 142 | 2.0 | 127 | 44 | 1.0 |
| 13104-01zk-14 | 1815 | 497 | 3.66 | 0.04874 | 0.00239 | 0.14844 | 0.00720 | 0.02209 | 0.00037 | 0.00704 | 0.00241 | 0.14 | 135 | 80  | 141 | 6  | 141 | 2.0 | 142 | 48 | 1.0 |
| 13104-01zk-15 | 1769 | 361 | 4.91 | 0.04889 | 0.00351 | 0.15203 | 0.01081 | 0.02255 | 0.00044 | 0.00623 | 0.00204 | 0.10 | 143 | 124 | 144 | 10 | 144 | 3.0 | 126 | 41 | 1.0 |

L60, Aoxi town, Le'an

|              |       |       |      |         |         |         |         |         |         |         |         |      |     |     |     |    |     |      |     |    |     |
|--------------|-------|-------|------|---------|---------|---------|---------|---------|---------|---------|---------|------|-----|-----|-----|----|-----|------|-----|----|-----|
| 150127-01-01 | 155.4 | 167.1 | 0.93 | 0.04845 | 0.00111 | 0.14234 | 0.00319 | 0.02131 | 0.00030 | 0.00545 | 0.00016 | 0.28 | 121 | 55  | 135 | 3  | 136 | 2.0  | 110 | 3  | 1.0 |
| 150127-01-02 | 193.6 | 180.7 | 1.07 | 0.04878 | 0.00100 | 0.15062 | 0.00304 | 0.02240 | 0.00032 | 0.00585 | 0.00015 | 0.33 | 137 | 49  | 142 | 3  | 143 | 2.0  | 118 | 3  | 1.0 |
| 150127-01-03 | 210.4 | 270.1 | 0.78 | 0.04816 | 0.00092 | 0.14144 | 0.00266 | 0.02130 | 0.00029 | 0.00548 | 0.00016 | 0.34 | 107 | 46  | 134 | 2  | 136 | 2.0  | 110 | 3  | 1.0 |
| 150127-01-04 | 162.3 | 189.3 | 0.86 | 0.04854 | 0.00100 | 0.14351 | 0.00290 | 0.02145 | 0.00030 | 0.00575 | 0.00016 | 0.32 | 126 | 50  | 136 | 3  | 137 | 2.0  | 116 | 3  | 1.0 |
| 150127-01-05 | 197.5 | 251.5 | 0.79 | 0.04903 | 0.00093 | 0.14212 | 0.00265 | 0.02102 | 0.00029 | 0.00557 | 0.00017 | 0.35 | 149 | 45  | 135 | 2  | 134 | 2.0  | 112 | 3  | 1.0 |
| 150127-01-06 | 158.8 | 225.2 | 0.71 | 0.04871 | 0.00102 | 0.14506 | 0.00298 | 0.02160 | 0.00031 | 0.00560 | 0.00019 | 0.32 | 134 | 50  | 138 | 3  | 138 | 2.0  | 113 | 4  | 1.0 |
| 150127-01-07 | 170.1 | 244.4 | 0.70 | 0.04938 | 0.00086 | 0.14854 | 0.00256 | 0.02182 | 0.00030 | 0.00565 | 0.00017 | 0.39 | 166 | 42  | 141 | 2  | 139 | 2.0  | 114 | 3  | 1.0 |
| 150127-01-08 | 250.6 | 455.2 | 0.55 | 0.04752 | 0.00346 | 0.14621 | 0.01017 | 0.02228 | 0.00061 | 0.00403 | 0.00053 | 0.08 | 75  | 162 | 139 | 9  | 142 | 4.0  | 81  | 11 | 1.0 |
| 150127-01-09 | 270.9 | 412.3 | 0.66 | 0.04894 | 0.00179 | 0.14712 | 0.00516 | 0.02180 | 0.00038 | 0.00617 | 0.00046 | 0.16 | 145 | 86  | 139 | 5  | 139 | 2.0  | 124 | 9  | 1.0 |
| 150127-01-10 | 130.9 | 141.8 | 0.92 | 0.04875 | 0.00143 | 0.14697 | 0.00418 | 0.02187 | 0.00032 | 0.00671 | 0.00032 | 0.20 | 136 | 70  | 139 | 4  | 139 | 2.0  | 135 | 6  | 1.0 |
| 150127-01-11 | 311.3 | 311.0 | 1.00 | 0.04928 | 0.00079 | 0.14505 | 0.00230 | 0.02135 | 0.00029 | 0.00580 | 0.00015 | 0.42 | 161 | 38  | 138 | 2  | 136 | 2.0  | 117 | 3  | 1.0 |
| 150127-01-12 | 321.9 | 296.8 | 1.08 | 0.04840 | 0.00087 | 0.13954 | 0.00249 | 0.02091 | 0.00029 | 0.00568 | 0.00015 | 0.38 | 119 | 43  | 133 | 2  | 133 | 2.0  | 114 | 3  | 1.0 |
| 150127-01-13 | 220.2 | 232.2 | 0.95 | 0.04909 | 0.00108 | 0.15212 | 0.00329 | 0.02248 | 0.00033 | 0.00608 | 0.00019 | 0.31 | 152 | 53  | 144 | 3  | 143 | 2.0  | 123 | 4  | 1.0 |
| 150127-01-14 | 186.6 | 192.4 | 0.97 | 0.04895 | 0.00329 | 0.14517 | 0.00936 | 0.02151 | 0.00053 | 0.00482 | 0.00040 | 0.08 | 145 | 152 | 138 | 8  | 137 | 3.0  | 97  | 8  | 1.0 |
| 150127-01-15 | 127.1 | 193.8 | 0.66 | 0.04971 | 0.00117 | 0.15007 | 0.00347 | 0.02190 | 0.00032 | 0.00599 | 0.00022 | 0.29 | 181 | 56  | 142 | 3  | 140 | 2.0  | 121 | 4  | 1.0 |
| 150127-01-16 | 112.7 | 138.7 | 0.81 | 0.04848 | 0.00140 | 0.14240 | 0.00402 | 0.02130 | 0.00033 | 0.00572 | 0.00022 | 0.23 | 123 | 69  | 135 | 4  | 136 | 2.0  | 115 | 4  | 1.0 |
| 150127-01-17 | 341.6 | 279.8 | 1.22 | 0.04960 | 0.00232 | 0.14627 | 0.00657 | 0.02139 | 0.00042 | 0.00617 | 0.00046 | 0.12 | 176 | 109 | 139 | 6  | 136 | 3.0  | 124 | 9  | 1.0 |
| 150127-01-18 | 274.7 | 244.2 | 1.13 | 0.04878 | 0.00135 | 0.13717 | 0.00370 | 0.02039 | 0.00031 | 0.00585 | 0.00027 | 0.24 | 137 | 66  | 131 | 3  | 130 | 2.0  | 118 | 5  | 1.0 |
| 150127-01-19 | 147.8 | 146.2 | 1.01 | 0.04827 | 0.00176 | 0.14736 | 0.00521 | 0.02214 | 0.00037 | 0.00695 | 0.00037 | 0.17 | 113 | 84  | 140 | 5  | 141 | 2.0  | 140 | 7  | 1.0 |
| 150127-01-20 | 137.9 | 160.5 | 0.86 | 0.04859 | 0.00110 | 0.15178 | 0.00339 | 0.02266 | 0.00033 | 0.00650 | 0.00025 | 0.31 | 128 | 55  | 143 | 3  | 144 | 2.0  | 131 | 5  | 1.0 |
| 150127-02-01 | 328.9 | 388.9 | 0.85 | 0.04993 | 0.00093 | 0.13853 | 0.00255 | 0.02012 | 0.00028 | 0.00628 | 0.00020 | 0.36 | 192 | 44  | 132 | 2  | 128 | 2.0  | 127 | 4  | 1.0 |
| 150127-02-02 | 164.6 | 193.9 | 0.85 | 0.04978 | 0.00246 | 0.13754 | 0.00655 | 0.02004 | 0.00041 | 0.00638 | 0.00039 | 0.13 | 185 | 114 | 131 | 6  | 128 | 3.0  | 129 | 8  | 1.0 |
| 150127-02-03 | 901.8 | 423.3 | 2.13 | 0.04892 | 0.00134 | 0.13842 | 0.00368 | 0.02052 | 0.00033 | 0.00574 | 0.00023 | 0.25 | 144 | 66  | 132 | 3  | 131 | 2.0  | 116 | 5  | 1.0 |
| 150127-02-04 | 300.7 | 417.5 | 0.72 | 0.04894 | 0.00078 | 0.13708 | 0.00217 | 0.02032 | 0.00028 | 0.00565 | 0.00016 | 0.43 | 145 | 38  | 130 | 2  | 130 | 2.0  | 114 | 3  | 1.0 |
| 150127-02-05 | 356.6 | 415.3 | 0.86 | 0.04915 | 0.00126 | 0.21824 | 0.00545 | 0.03221 | 0.00052 | 0.00497 | 0.00024 | 0.28 | 155 | 61  | 200 | 5  | 204 | 3.0  | 100 | 5  | 1.0 |
| 150127-02-06 | 103.4 | 107.4 | 0.96 | 0.04881 | 0.00357 | 0.15642 | 0.01099 | 0.02325 | 0.00058 | 0.00586 | 0.00051 | 0.06 | 139 | 165 | 148 | 10 | 148 | 4.0  | 118 | 10 | 1.0 |
| 150127-02-07 | 164.5 | 116.8 | 1.41 | 0.04857 | 0.00128 | 0.14045 | 0.00362 | 0.02097 | 0.00030 | 0.00585 | 0.00019 | 0.24 | 127 | 63  | 133 | 3  | 134 | 2.0  | 118 | 4  | 1.0 |
| 150127-02-08 | 464.1 | 456.3 | 1.02 | 0.04987 | 0.00119 | 0.23273 | 0.00540 | 0.02385 | 0.00052 | 0.00564 | 0.00029 | 0.29 | 189 | 57  | 212 | 4  | 215 | 3.0  | 114 | 6  | 1.0 |
| 150127-02-09 | 229.9 | 204.0 | 1.13 | 0.04956 | 0.00143 | 0.14326 | 0.00400 | 0.02097 | 0.00031 | 0.00594 | 0.00028 | 0.20 | 174 | 69  | 136 | 4  | 134 | 2.0  | 120 | 6  | 1.0 |
| 150127-02-10 | 204.9 | 226.4 | 0.90 | 0.04932 | 0.00137 | 0.14716 | 0.00397 | 0.02164 | 0.00034 | 0.00510 | 0.00023 | 0.24 | 163 | 66  | 139 | 4  | 138 | 2.0  | 103 | 5  | 1.0 |
| 150127-02-11 | 183.4 | 227.8 | 0.80 | 0.04890 | 0.00095 | 0.13530 | 0.00258 | 0.02007 | 0.00028 | 0.00533 | 0.00014 | 0.34 | 143 | 47  | 129 | 2  | 128 | 2.0  | 107 | 3  | 1.0 |
| 150127-02-12 | 434.7 | 511.9 | 0.85 | 0.04808 | 0.00114 | 0.20715 | 0.00480 | 0.03125 | 0.00050 | 0.00457 | 0.00020 | 0.31 | 103 | 57  | 191 | 4  | 198 | 3.0  | 92  | 4  | 1.0 |
| 150127-02-13 | 257.8 | 369.0 | 0.70 | 0.04915 | 0.00075 | 0.13604 | 0.00207 | 0.02008 | 0.00027 | 0.00515 | 0.00013 | 0.44 | 155 | 37  | 130 | 2  | 128 | 2.0  | 104 | 3  | 1.0 |
| 150127-02-14 | 221.6 | 270.4 | 0.82 | 0.04859 | 0.00100 | 0.13207 | 0.00265 | 0.01972 | 0.00027 | 0.00503 | 0.00015 | 0.30 | 128 | 50  | 126 | 2  | 126 | 2.0  | 101 | 3  | 1.0 |
| 150127-02-15 | 69.9  | 81.2  | 0.86 | 0.06649 | 0.00167 | 1.25051 | 0.03040 | 0.13645 | 0.00223 | 0.03416 | 0.00170 | 0.29 | 822 | 54  | 824 | 14 | 825 | 13.0 | 679 | 33 | 1.0 |
| 150127-02-16 | 397.1 | 295.3 | 1.34 | 0.04937 | 0.00160 | 0.14498 | 0.00454 | 0.02131 | 0.00036 | 0.00524 | 0.00025 | 0.20 | 165 | 77  | 137 | 4  | 136 | 2.0  | 106 | 5  | 1.0 |
| 150127-02-17 | 249.1 | 308.1 | 0.81 | 0.04876 | 0.00087 | 0.14296 | 0.00252 | 0.02127 | 0.00029 | 0.00566 | 0.00018 | 0.37 | 136 | 43  | 136 | 2  | 136 | 2.0  | 114 | 4  | 1.0 |
| 150127-02-18 | 144.8 | 200.8 | 0.72 | 0.04910 | 0.00113 | 0.15333 | 0.00343 | 0.02265 | 0.00033 | 0.00556 | 0.00020 | 0.28 | 153 | 55  | 145 | 3  | 144 | 2.0  | 112 | 4  | 1.0 |
| 150127-02-19 | 384.6 | 299.4 | 1.28 | 0.04892 | 0.00102 | 0.14168 | 0.00289 | 0.02101 | 0.00030 | 0.00509 | 0.00018 | 0.32 | 144 | 50  | 135 | 3  | 134 | 2.0  | 103 | 4  | 1.0 |
| 150127-02-20 | 79.0  | 89.2  | 0.89 | 0.04926 | 0.00161 | 0.15234 | 0.00481 | 0.02243 | 0.00035 | 0.00594 | 0.00025 | 0.17 | 160 | 78  | 144 | 4  | 143 | 2.0  | 120 | 5  | 1.0 |

L7, Baisha, Tiantou of Ningdu Basin

|    |               |     |     |       |         |         |         |         |         |         |         |         |      |     |     |     |    |     |     |     |    |     |
|----|---------------|-----|-----|-------|---------|---------|---------|---------|---------|---------|---------|---------|------|-----|-----|-----|----|-----|-----|-----|----|-----|
|    | 124-01-01     | 42  | 372 | 0.11  | 0.05502 | 0.00065 | 0.47366 | 0.00572 | 0.06245 | 0.00085 | 0.01843 | 0.00066 | 0.58 | 413 | 27  | 394 | 4  | 391 | 5.0 | 369 | 13 | 1.0 |
|    | 124-01-02     | 58  | 437 | 0.13  | 0.05192 | 0.00060 | 0.30559 | 0.00359 | 0.04270 | 0.00056 | 0.01060 | 0.00037 | 0.57 | 282 | 27  | 271 | 3  | 270 | 3.0 | 213 | 7  | 1.0 |
|    | 124-01-03     | 143 | 38  | 3.75  | 0.04880 | 0.00299 | 0.14030 | 0.00831 | 0.02086 | 0.00043 | 0.00655 | 0.00026 | 0.07 | 138 | 139 | 133 | 7  | 133 | 3.0 | 132 | 5  | 1.0 |
|    | 124-01-04     | 113 | 30  | 3.74  | 0.04837 | 0.00691 | 0.15218 | 0.02099 | 0.02283 | 0.00093 | 0.00694 | 0.00058 | 0.02 | 117 | 287 | 144 | 18 | 146 | 6.0 | 140 | 12 | 1.0 |
|    | 124-01-05     | 58  | 493 | 0.12  | 0.04935 | 0.00090 | 0.14862 | 0.00264 | 0.02185 | 0.00030 | 0.00739 | 0.00039 | 0.35 | 164 | 44  | 141 | 2  | 139 | 2.0 | 149 | 8  | 1.0 |
|    | 124-01-06     | 144 | 144 | 1.00  | 0.04866 | 0.00126 | 0.13966 | 0.00352 | 0.02082 | 0.00030 | 0.00628 | 0.00024 | 0.24 | 131 | 62  | 133 | 3  | 133 | 2.0 | 127 | 5  | 1.0 |
|    | 124-01-07     | 180 | 62  | 2.89  | 0.04920 | 0.00247 | 0.14171 | 0.00687 | 0.02090 | 0.00040 | 0.00684 | 0.00030 | 0.11 | 157 | 115 | 135 | 6  | 133 | 3.0 | 138 | 6  | 1.0 |
|    | 124-01-08     | 941 | 382 | 2.47  | 0.04916 | 0.00095 | 0.14632 | 0.00277 | 0.02160 | 0.00030 | 0.00982 | 0.00041 | 0.34 | 155 | 46  | 139 | 2  | 138 | 2.0 | 198 | 8  | 1.0 |
|    | 124-01-09     | 43  | 22  | 1.92  | 0.04905 | 0.00573 | 0.14560 | 0.01648 | 0.02154 | 0.00069 | 0.00768 | 0.00070 | 0.03 | 150 | 253 | 138 | 15 | 137 | 4.0 | 155 | 14 | 1.0 |
|    | 124-01-10     | 13  | 115 | 0.11  | 0.04842 | 0.00130 | 0.13575 | 0.00355 | 0.02034 | 0.00030 | 0.00717 | 0.00049 | 0.23 | 120 | 64  | 129 | 3  | 130 | 2.0 | 144 | 10 | 1.0 |
|    | 124-01-11     | 167 | 98  | 1.70  | 0.05517 | 0.00103 | 0.51254 | 0.00933 | 0.06740 | 0.00095 | 0.01955 | 0.00058 | 0.35 | 419 | 43  | 420 | 6  | 420 | 6.0 | 391 | 11 | 1.0 |
|    | 124-01-13     | 295 | 108 | 2.74  | 0.04874 | 0.00130 | 0.15590 | 0.00406 | 0.02320 | 0.00035 | 0.00671 | 0.00019 | 0.25 | 135 | 64  | 147 | 4  | 148 | 2.0 | 135 | 4  | 1.0 |
|    | 124-01-14     | 195 | 385 | 0.51  | 0.05577 | 0.00113 | 0.55185 | 0.01103 | 0.07179 | 0.00113 | 0.02065 | 0.00107 | 0.38 | 443 | 46  | 446 | 7  | 447 | 7.0 | 413 | 21 | 1.0 |
|    | 124-01-15     | 83  | 27  | 3.02  | 0.04951 | 0.00363 | 0.14779 | 0.01049 | 0.02166 | 0.00050 | 0.00706 | 0.00034 | 0.06 | 172 | 167 | 140 | 9  | 138 | 3.0 | 142 | 7  | 1.0 |
|    | 124-01-16     | 216 | 167 | 1.30  | 0.06141 | 0.00131 | 0.87780 | 0.01804 | 0.10368 | 0.00147 | 0.03426 | 0.00199 | 0.29 | 654 | 47  | 640 | 10 | 636 | 9.0 | 681 | 39 | 1.0 |
|    | 124-01-17     | 136 | 34  | 3.96  | 0.04920 | 0.00400 | 0.15897 | 0.01245 | 0.02344 | 0.00060 | 0.00721 | 0.00044 | 0.04 | 157 | 184 | 150 | 11 | 149 | 4.0 | 145 | 9  | 1.0 |
|    | 124-01-18     | 101 | 55  | 1.85  | 0.05501 | 0.00254 | 0.49828 | 0.02210 | 0.06570 | 0.00132 | 0.01893 | 0.00123 | 0.13 | 413 | 106 | 411 | 15 | 410 | 8.0 | 379 | 24 | 1.0 |
|    | 124-01-19     | 157 | 34  | 4.60  | 0.05041 | 0.00259 | 0.16008 | 0.00794 | 0.02304 | 0.00044 | 0.00669 | 0.00027 | 0.10 | 214 | 120 | 151 | 7  | 147 | 3.0 | 135 | 5  | 1.0 |
|    | 124-01-20     | 319 | 318 | 1.00  | 0.05038 | 0.00105 | 0.23146 | 0.00469 | 0.03333 | 0.00047 | 0.00967 | 0.00049 | 0.31 | 213 | 49  | 211 | 4  | 211 | 3.0 | 195 | 10 | 1.0 |
| G2 | 13109-01zk-11 | 189 | 119 | 1.59  | 0.05132 | 0.00836 | 0.15216 | 0.02464 | 0.0215  | 0.0005  | 0.00828 | 0.00241 | 0.03 | 255 | 302 | 144 | 22 | 137 | 3.0 | 167 | 48 | 1.0 |
|    | 13109-01zk-19 | 459 | 29  | 15.65 | 0.04882 | 0.02988 | 0.14854 | 0.09061 | 0.02207 | 0.00115 | 0.00523 | 0.00126 | 0    | 139 | 980 | 141 | 80 | 141 | 7.0 | 105 | 25 | 1.0 |
|    | 13109-01zk-10 | 95  | 34  | 2.84  | 0.04821 | 0.03083 | 0.15019 | 0.09569 | 0.02259 | 0.00129 | 0.00681 | 0.00318 | 0    | 110 | 981 | 142 | 84 | 144 | 8.0 | 137 | 64 | 1.0 |

|            |     |     |      |         |         |         |       |     |
|------------|-----|-----|------|---------|---------|---------|-------|-----|
| SH003-11.1 | 189 | 186 | 1.05 | 0.04070 | 0.11740 | 0.02094 | 134.9 | 1.7 |
| SH003-12.1 | 286 | 306 | 0.96 | 0.05940 | 0.18180 | 0.02220 | 139.7 | 1.6 |
| SH003-13.1 | 301 | 328 | 0.95 | 0.05110 | 0.14690 | 0.02084 | 132.6 | 1.4 |
| SH003-14.1 | 133 | 131 | 1.04 | 0.04470 | 0.13000 | 0.02110 | 135.2 | 1.8 |

M16b, Shuangling, Gui (Wu and Wu, 2013)

|            |     |      |       |         |         |         |         |          |         |       |     |
|------------|-----|------|-------|---------|---------|---------|---------|----------|---------|-------|-----|
| GX103-1.1  | 249 | 5    | 7.89  | 0.04690 | 2.60000 | 0.13440 | 3.20000 | 0.020 77 | 1.70000 | 132.5 | 2.3 |
| GX103-2.1  | 147 | 311  | 0.49  | 0.04750 | 9.00000 | 0.14100 | 9.20000 | 0.021 59 | 2.10000 | 137.7 | 2.8 |
| GX103-3.1  | 112 | 460  | 3.58  | 0.04900 | 4.10000 | 0.14450 | 4.50000 | 0.021 41 | 2.00000 | 136.6 | 2.6 |
| GX103-4.1  | 80  | 184  | 0.10  | 0.03600 | #####   | 0.10200 | #####   | 0.020 34 | 3.00000 | 129.8 | 3.9 |
| GX103-5.1  | 495 | 2761 | 2.53  | 0.04730 | 2.10000 | 0.12940 | 2.70000 | 0.019 83 | 1.60000 | 126.6 | 2.0 |
| GX103-6.1  | 262 | 215  | 3.35  | 0.05640 | #####   | 0.16100 | #####   | 0.020 71 | 2.40000 | 132.1 | 3.2 |
| GX103-7.1  | 93  | 348  | 0.98  | 0.04840 | 9.30000 | 0.13900 | 9.50000 | 0.020 83 | 2.00000 | 132.9 | 2.7 |
| GX103-8.1  | 399 | 987  | 4.95  | 0.04550 | 2.60000 | 0.12990 | 3.40000 | 0.020 71 | 2.10000 | 132.2 | 2.8 |
| GX103-9.1  | 220 | 774  | 0.52  | 0.04520 | 3.90000 | 0.13930 | 4.30000 | 0.022 33 | 1.80000 | 142.4 | 2.5 |
| GX103-10.1 | 162 | 850  | 2.03  | 0.04470 | 4.30000 | 0.13230 | 4.90000 | 0.021 46 | 2.20000 | 136.9 | 3.0 |
| GX103-11.1 | 588 | 862  | 10.00 | 0.04540 | 4.40000 | 0.13020 | 4.70000 | 0.020 81 | 1.80000 | 132.8 | 2.3 |
| GX103-12.1 | 201 | 743  | 1.17  | 0.04870 | 2.70000 | 0.13990 | 3.30000 | 0.020 83 | 1.80000 | 132.9 | 2.3 |
| GX103-13.1 | 87  | 536  | 0.48  | 0.04850 | 3.70000 | 0.15240 | 4.20000 | 0.022 81 | 1.90000 | 145.4 | 2.7 |
| GX103-14.1 | 514 | 3441 | 5.15  | 0.04826 | 1.80000 | 0.12780 | 2.40000 | 0.019 21 | 1.60000 | 122.6 | 2.0 |
| GX103-15.1 | 257 | 1101 | 4.62  | 0.04680 | 2.40000 | 0.14020 | 2.90000 | 0.021 72 | 1.70000 | 138.5 | 2.4 |

M16b, Shuangling, Gui (Shu et al., 2017)

|            |      |      |      |        |        |        |        |        |        |     |    |     |      |     |
|------------|------|------|------|--------|--------|--------|--------|--------|--------|-----|----|-----|------|-----|
| 14SY-42-1  | 325  | 303  | 1.07 | 0.0507 | 0.0037 | 0.1465 | 0.0102 | 0.0213 | 0.0005 | 139 | 9  | 136 | 3.0  | 1.0 |
| 14SY-42-2  | 235  | 230  | 1.02 | 0.0501 | 0.005  | 0.1508 | 0.0138 | 0.022  | 0.0005 | 143 | 12 | 141 | 3.0  | 1.0 |
| 14SY-42-3  | 568  | 681  | 0.83 | 0.0495 | 0.003  | 0.1456 | 0.0077 | 0.0216 | 0.0004 | 138 | 7  | 138 | 3.0  | 1.0 |
| 14SY-42-4  | 258  | 189  | 1.37 | 0.0465 | 0.004  | 0.1401 | 0.0116 | 0.0217 | 0.0005 | 133 | 10 | 139 | 3.0  | 1.0 |
| 14SY-42-5  | 188  | 211  | 0.89 | 0.0494 | 0.0057 | 0.1448 | 0.0149 | 0.0216 | 0.0005 | 137 | 13 | 138 | 3.0  | 1.0 |
| 14SY-42-6  | 293  | 361  | 0.81 | 0.0527 | 0.0038 | 0.153  | 0.0101 | 0.0214 | 0.0004 | 145 | 9  | 137 | 3.0  | 0.9 |
| 14SY-42-7  | 84   | 186  | 0.45 | 0.0485 | 0.0052 | 0.145  | 0.0148 | 0.0214 | 0.0005 | 137 | 13 | 137 | 3.0  | 1.0 |
| 14SY-42-8  | 606  | 434  | 1.4  | 0.0495 | 0.0044 | 0.145  | 0.0116 | 0.0213 | 0.0004 | 138 | 10 | 136 | 3.0  | 1.0 |
| 14SY-42-9  | 222  | 229  | 0.97 | 0.0502 | 0.0046 | 0.1459 | 0.0113 | 0.0216 | 0.0005 | 138 | 10 | 138 | 3.0  | 1.0 |
| 14SY-42-10 | 171  | 161  | 1.06 | 0.0495 | 0.0047 | 0.15   | 0.0136 | 0.0223 | 0.0006 | 142 | 12 | 142 | 4.0  | 1.0 |
| 14SY-42-11 | 205  | 185  | 1.11 | 0.0498 | 0.0046 | 0.1423 | 0.0103 | 0.0213 | 0.0006 | 135 | 9  | 136 | 4.0  | 1.0 |
| 14SY-42-12 | 243  | 184  | 1.32 | 0.0495 | 0.0043 | 0.1459 | 0.0112 | 0.0216 | 0.0004 | 138 | 10 | 138 | 3.0  | 1.0 |
| 14SY-42-13 | 418  | 349  | 1.2  | 0.0497 | 0.0032 | 0.1472 | 0.0087 | 0.0219 | 0.0004 | 139 | 8  | 139 | 2.0  | 1.0 |
| 14SY-42-14 | 120  | 165  | 0.73 | 0.047  | 0.0044 | 0.1366 | 0.0115 | 0.0217 | 0.0004 | 130 | 10 | 139 | 3.0  | 1.1 |
| 14SY-42-15 | 279  | 240  | 1.16 | 0.0538 | 0.0043 | 0.1613 | 0.0137 | 0.0216 | 0.0005 | 152 | 12 | 138 | 3.0  | 0.9 |
| 14SY-42-16 | 255  | 226  | 1.13 | 0.0499 | 0.0048 | 0.1424 | 0.0129 | 0.0211 | 0.0005 | 135 | 11 | 135 | 3.0  | 1.0 |
| 14SY-42-17 | 257  | 271  | 0.95 | 0.0519 | 0.0041 | 0.1509 | 0.0106 | 0.0212 | 0.0004 | 143 | 9  | 135 | 3.0  | 0.9 |
| 14SY-42-18 | 106  | 122  | 0.87 | 0.0545 | 0.0119 | 0.1513 | 0.0262 | 0.0223 | 0.0015 | 143 | 23 | 142 | 10.0 | 1.0 |
| 14SY-42-19 | 306  | 292  | 1.05 | 0.0464 | 0.004  | 0.1384 | 0.011  | 0.0214 | 0.0004 | 132 | 10 | 137 | 3.0  | 1.0 |
| 14SY-42-20 | 188  | 147  | 1.28 | 0.0538 | 0.0053 | 0.155  | 0.0126 | 0.0213 | 0.0006 | 146 | 11 | 136 | 4.0  | 0.9 |
| 14SY-42-21 | 133  | 145  | 0.92 | 0.053  | 0.0052 | 0.1647 | 0.0149 | 0.022  | 0.0006 | 155 | 13 | 140 | 4.0  | 0.9 |
| 14SY-42-22 | 291  | 342  | 0.85 | 0.0486 | 0.0037 | 0.1429 | 0.0107 | 0.0213 | 0.0005 | 136 | 10 | 136 | 3.0  | 1.0 |
| 14SY-1-1   | 35   | 45   | 0.78 | 0.0529 | 0.0116 | 0.1389 | 0.0237 | 0.021  | 0.0009 | 132 | 21 | 134 | 6.0  | 1.0 |
| 14SY-1-2   | 116  | 120  | 0.97 | 0.0513 | 0.0056 | 0.1427 | 0.0132 | 0.0213 | 0.0005 | 135 | 12 | 136 | 3.0  | 1.0 |
| 14SY-1-3   | 61   | 89   | 0.69 | 0.0543 | 0.0102 | 0.1448 | 0.0195 | 0.0214 | 0.0007 | 137 | 17 | 137 | 5.0  | 1.0 |
| 14SY-1-4   | 38   | 44   | 0.85 | 0.0509 | 0.0091 | 0.1375 | 0.018  | 0.0208 | 0.0009 | 131 | 16 | 133 | 6.0  | 1.0 |
| 14SY-1-5   | 134  | 103  | 1.3  | 0.0489 | 0.0086 | 0.1378 | 0.0185 | 0.0203 | 0.0008 | 131 | 17 | 130 | 5.0  | 1.0 |
| 14SY-1-6   | 80   | 80   | 1    | 0.0556 | 0.018  | 0.1456 | 0.0379 | 0.0217 | 0.0014 | 138 | 34 | 138 | 9.0  | 1.0 |
| 14SY-1-7   | 606  | 750  | 0.81 | 0.0496 | 0.0031 | 0.1485 | 0.0095 | 0.0217 | 0.0005 | 141 | 8  | 138 | 3.0  | 1.0 |
| 14SY-1-8   | 74   | 107  | 0.69 | 0.0492 | 0.0075 | 0.1418 | 0.0205 | 0.0211 | 0.0005 | 135 | 18 | 134 | 3.0  | 1.0 |
| 14SY-1-9   | 97   | 101  | 0.96 | 0.0504 | 0.006  | 0.1577 | 0.0152 | 0.0217 | 0.0007 | 149 | 13 | 138 | 4.0  | 0.9 |
| 14SY-1-10  | 72   | 69   | 1.04 | 0.0567 | 0.017  | 0.1397 | 0.0282 | 0.0212 | 0.0016 | 133 | 25 | 135 | 10.0 | 1.0 |
| 14SY-1-11  |      |      |      | 0.051  | 0.0093 | 0.145  | 0.0184 | 0.0214 | 0.0009 | 138 | 16 | 137 | 6.0  | 1.0 |
| 14SY-1-12  | 92   | 106  | 0.87 | 0.0515 | 0.0052 | 0.1416 | 0.0113 | 0.021  | 0.0006 | 134 | 10 | 134 | 4.0  | 1.0 |
| 14SY-1-13  | 160  | 121  | 1.32 | 0.0516 | 0.0076 | 0.1479 | 0.0191 | 0.0217 | 0.0005 | 140 | 17 | 138 | 3.0  | 1.0 |
| 14SY-1-14  | 101  | 110  | 0.91 | 0.0511 | 0.0046 | 0.1449 | 0.0109 | 0.0212 | 0.0005 | 137 | 10 | 135 | 3.0  | 1.0 |
| 14SY-1-15  | 50   | 74   | 0.67 | 0.0552 | 0.0139 | 0.1555 | 0.0363 | 0.0231 | 0.0009 | 147 | 32 | 147 | 6.0  | 1.0 |
| 14SY-1-16  | 60   | 85   | 0.71 | 0.052  | 0.0068 | 0.1371 | 0.0137 | 0.0205 | 0.0007 | 130 | 12 | 131 | 4.0  | 1.0 |
| 14SY-36-1  | 313  | 725  | 0.43 | 0.0488 | 0.0031 | 0.149  | 0.0096 | 0.0221 | 0.0004 | 141 | 9  | 141 | 3.0  | 1.0 |
| 14SY-36-2  | 322  | 277  | 1.16 | 0.0484 | 0.0031 | 0.1408 | 0.0082 | 0.0212 | 0.0005 | 134 | 7  | 135 | 3.0  | 1.0 |
| 14SY-36-3  | 719  | 986  | 0.73 | 0.0524 | 0.0023 | 0.1561 | 0.0073 | 0.0215 | 0.0004 | 147 | 6  | 137 | 3.0  | 0.9 |
| 14SY-36-4  | 1275 | 1587 | 0.8  | 0.0477 | 0.0019 | 0.1412 | 0.0054 | 0.0215 | 0.0003 | 134 | 5  | 137 | 2.0  | 1.0 |
| 14SY-36-5  | 778  | 810  | 0.96 | 0.051  | 0.003  | 0.1506 | 0.009  | 0.0213 | 0.0004 | 142 | 8  | 136 | 2.0  | 1.0 |
| 14SY-36-6  | 365  | 468  | 0.78 | 0.0486 | 0.0026 | 0.1443 | 0.0074 | 0.0216 | 0.0004 | 137 | 7  | 138 | 2.0  | 1.0 |
| 14SY-36-7  | 497  | 590  | 0.84 | 0.053  | 0.0029 | 0.1517 | 0.0084 | 0.0206 | 0.0003 | 143 | 7  | 132 | 2.0  | 0.9 |
| 14SY-36-8  | 699  | 866  | 0.81 | 0.0527 | 0.003  | 0.1541 | 0.0085 | 0.0213 | 0.0004 | 146 | 8  | 136 | 3.0  | 0.9 |
| 14SY-36-9  | 313  | 288  | 1.09 | 0.0542 | 0.0083 | 0.1608 | 0.0225 | 0.0222 | 0.0007 | 151 | 20 | 142 | 4.0  | 0.9 |
| 14SY-36-10 | 745  | 1202 | 0.62 | 0.0489 | 0.0023 | 0.1412 | 0.0066 | 0.0208 | 0.0003 | 134 | 6  | 133 | 2.0  | 1.0 |
| 14SY-36-11 | 197  | 236  | 0.83 | 0.0506 | 0.0038 | 0.1455 | 0.0105 | 0.021  | 0.0004 | 138 | 9  | 134 | 3.0  | 1.0 |
| 14SY-36-12 | 258  | 196  | 1.31 | 0.0539 | 0.0048 | 0.1588 | 0.0126 | 0.0213 | 0.0005 | 150 | 11 | 136 | 3.0  | 0.9 |
| 14SY-36-13 | 912  | 1179 | 0.77 | 0.0541 | 0.0033 | 0.1618 | 0.0081 | 0.0219 | 0.0004 | 152 | 7  | 139 | 2.0  | 0.9 |
| 14SY-36-14 | 394  | 379  | 1.04 | 0.051  | 0.0037 | 0.1477 | 0.0106 | 0.021  | 0.0004 | 140 | 9  | 134 | 2.0  | 1.0 |
| 14SY-36-15 | 150  | 149  | 1.01 | 0.0493 | 0.0055 | 0.1521 | 0.0158 | 0.0226 | 0.0007 | 144 | 14 | 144 | 4.0  | 1.0 |
| 14SY-36-16 | 170  | 200  | 0.85 | 0.0494 | 0.0037 | 0.1452 | 0.0101 | 0.0214 | 0.0004 | 138 | 9  | 137 | 3.0  | 1.0 |
| 14SY-36-17 | 832  | 1243 | 0.67 | 0.054  | 0.0025 | 0.1651 | 0.0082 | 0.0221 | 0.0004 | 155 | 7  | 141 | 2.0  | 0.9 |
| 14SY-17-1  | 1924 | 2944 | 0.65 | 0.0455 | 0.0018 | 0.1354 | 0.0056 | 0.0214 | 0.0003 | 129 | 5  | 137 | 2.0  | 1.1 |
| 14SY-17-2  | 2723 | 3528 | 0.77 | 0.0469 | 0.0021 | 0.1379 | 0.0064 | 0.0211 | 0.0003 | 131 | 6  | 135 | 2.0  | 1.0 |
| 14SY-17-3  | 2580 | 3809 | 0.68 | 0.0474 | 0.0021 | 0.1381 | 0.0062 | 0.021  | 0.0003 | 131 | 6  | 134 | 2.0  | 1.0 |
| 14SY-17-4  | 1313 | 2173 | 0.6  | 0.0473 | 0.0019 | 0.1427 | 0.0059 | 0.0217 | 0.0003 | 135 | 5  | 138 | 2.0  | 1.0 |

|            |      |      |      |        |        |        |        |        |        |     |   |     |     |     |
|------------|------|------|------|--------|--------|--------|--------|--------|--------|-----|---|-----|-----|-----|
| 14SY-17-5  | 1768 | 3175 | 0.56 | 0.046  | 0.0016 | 0.1388 | 0.0044 | 0.0217 | 0.0002 | 132 | 4 | 138 | 2.0 | 1.0 |
| 14SY-17-6  | 1620 | 2394 | 0.68 | 0.0505 | 0.0022 | 0.1508 | 0.0059 | 0.0215 | 0.0003 | 143 | 5 | 137 | 2.0 | 1.0 |
| 14SY-17-7  | 843  | 1852 | 0.46 | 0.048  | 0.0023 | 0.1411 | 0.0069 | 0.021  | 0.0003 | 134 | 6 | 134 | 2.0 | 1.0 |
| 14SY-17-8  | 1412 | 2638 | 0.54 | 0.0486 | 0.0018 | 0.1464 | 0.005  | 0.0216 | 0.0003 | 139 | 4 | 138 | 2.0 | 1.0 |
| 14SY-17-9  | 2114 | 3362 | 0.63 | 0.0504 | 0.0026 | 0.146  | 0.0066 | 0.0209 | 0.0004 | 138 | 6 | 134 | 3.0 | 1.0 |
| 14SY-17-10 | 896  | 1738 | 0.52 | 0.0479 | 0.0033 | 0.1463 | 0.0099 | 0.0219 | 0.0005 | 139 | 9 | 140 | 3.0 | 1.0 |
| 14SY-17-11 | 1414 | 2426 | 0.58 | 0.0487 | 0.0015 | 0.1483 | 0.0046 | 0.0218 | 0.0003 | 140 | 4 | 139 | 2.0 | 1.0 |
| 14SY-17-12 | 1264 | 1923 | 0.66 | 0.049  | 0.0019 | 0.142  | 0.0052 | 0.0208 | 0.0002 | 135 | 5 | 133 | 1.0 | 1.0 |
| 14SY-17-13 | 1266 | 2051 | 0.62 | 0.0462 | 0.0017 | 0.1374 | 0.0051 | 0.0213 | 0.0003 | 131 | 5 | 136 | 2.0 | 1.0 |
| 14SY-17-14 | 1251 | 2123 | 0.59 | 0.0503 | 0.0021 | 0.1464 | 0.0059 | 0.021  | 0.0003 | 139 | 5 | 134 | 2.0 | 1.0 |
| 14SY-17-15 | 1757 | 3131 | 0.56 | 0.0468 | 0.0018 | 0.1375 | 0.0057 | 0.0211 | 0.0002 | 131 | 5 | 134 | 1.0 | 1.0 |
| 14SY-17-16 | 1771 | 2489 | 0.71 | 0.0554 | 0.0023 | 0.1673 | 0.0069 | 0.0217 | 0.0003 | 157 | 6 | 139 | 2.0 | 0.9 |
| 14SY-17-17 | 3793 | 3888 | 0.98 | 0.0535 | 0.0018 | 0.1563 | 0.0056 | 0.021  | 0.0003 | 147 | 5 | 134 | 2.0 | 0.9 |
| 14SY-17-18 | 702  | 1557 | 0.45 | 0.051  | 0.0016 | 0.1485 | 0.0047 | 0.021  | 0.0003 | 141 | 4 | 134 | 2.0 | 1.0 |
| 14SY-17-19 | 865  | 1637 | 0.53 | 0.0516 | 0.0024 | 0.1476 | 0.0064 | 0.0208 | 0.0003 | 140 | 6 | 133 | 2.0 | 1.0 |
| 14SY-17-20 | 1560 | 2391 | 0.65 | 0.0508 | 0.0016 | 0.1494 | 0.005  | 0.0212 | 0.0003 | 141 | 4 | 135 | 2.0 | 1.0 |

M17, Tianhuashan basin near the boundary of Fujian and Jiangxi (Su et al., 2013; LSK-30 from Su et al., 2014)

|           |      |      |      |         |         |          |         |         |         |      |      |      |    |      |      |     |
|-----------|------|------|------|---------|---------|----------|---------|---------|---------|------|------|------|----|------|------|-----|
| LSK-30-1  | 331  | 512  | 0.65 | 0.04680 | 0.00044 | 0.14132  | 0.00403 | 0.02164 | 0.00031 | 39   | 22   | 134  | 4  | 138  | 2.0  | 1.0 |
| LSK-30-2  | 272  | 330  | 0.82 | 0.04812 | 0.00074 | 0.14981  | 0.00700 | 0.02211 | 0.00041 | 106  | 32   | 142  | 6  | 141  | 3.0  | 1.0 |
| LSK-30-3  | 392  | 516  | 0.76 | 0.04646 | 0.00028 | 0.14048  | 0.00286 | 0.02190 | 0.00041 | 20   | 15   | 133  | 3  | 140  | 3.0  | 1.1 |
| LSK-30-4  | 116  | 189  | 0.61 | 0.04990 | 0.00147 | 0.15216  | 0.00487 | 0.02218 | 0.00029 | 191  | 69   | 144  | 4  | 141  | 2.0  | 1.0 |
| LSK-30-5  | 306  | 392  | 0.78 | 0.04777 | 0.00144 | 0.14752  | 0.00531 | 0.02224 | 0.00040 | 87   | 77   | 140  | 5  | 142  | 3.0  | 1.0 |
| LSK-30-6  | 798  | 737  | 1.08 | 0.04629 | 0.00024 | 0.13812  | 0.00107 | 0.02166 | 0.00014 | 13   | -183 | 131  | 1  | 138  | 1.0  | 1.1 |
| LSK-30-7  | 350  | 338  | 1.03 | 0.04853 | 0.00047 | 0.14789  | 0.00128 | 0.02223 | 0.00017 | 124  | 22   | 140  | 1  | 142  | 1.0  | 1.0 |
| LSK-30-8  | 925  | 706  | 1.31 | 0.04688 | 0.00038 | 0.14307  | 0.00138 | 0.02216 | 0.00015 | 43   | 14   | 136  | 1  | 141  | 1.0  | 1.0 |
| LSK-30-9  | 281  | 390  | 0.72 | 0.04638 | 0.00028 | 0.13787  | 0.00111 | 0.02159 | 0.00015 | 17   | -184 | 131  | 1  | 138  | 1.0  | 1.1 |
| LSK-30-10 | 503  | 638  | 0.79 | 0.04765 | 0.00065 | 0.14386  | 0.00239 | 0.02187 | 0.00015 | 83   | 33   | 136  | 2  | 139  | 1.0  | 1.0 |
| LSK-30-11 | 936  | 1028 | 0.91 | 0.05089 | 0.00030 | 0.15700  | 0.00163 | 0.02235 | 0.00017 | 235  | 15   | 148  | 1  | 142  | 1.0  | 1.0 |
| LSK-30-12 | 558  | 609  | 0.92 | 0.04925 | 0.00118 | 0.15393  | 0.00585 | 0.02222 | 0.00026 | 167  | 57   | 145  | 5  | 142  | 2.0  | 1.0 |
| LSK-30-13 | 637  | 743  | 0.86 | 0.04933 | 0.00134 | 0.15274  | 0.00564 | 0.02215 | 0.00019 | 165  | 68   | 144  | 5  | 141  | 1.0  | 1.0 |
| LSK-30-14 | 132  | 231  | 0.57 | 0.05040 | 0.00168 | 0.15436  | 0.00551 | 0.02234 | 0.00028 | 213  | 50   | 146  | 5  | 142  | 2.0  | 1.0 |
| LSK-30-15 | 513  | 560  | 0.92 | 0.04702 | 0.00122 | 0.14548  | 0.00761 | 0.02180 | 0.00023 | 50   | 59   | 138  | 7  | 139  | 1.0  | 1.0 |
| LSK-30-16 | 619  | 750  | 0.83 | 0.04666 | 0.00090 | 0.14111  | 0.00419 | 0.02167 | 0.00017 | 32   | 44   | 134  | 4  | 138  | 1.0  | 1.0 |
|           |      |      |      |         |         |          |         |         |         |      |      |      |    |      |      |     |
| LSK107-01 | 153  | 132  | 1.16 | 0.05001 | 0.00265 | 0.14968  | 0.00761 | 0.02181 | 0.00035 | 195  | 122  | 142  | 7  | 139  | 2.0  | 1.0 |
| LSK107-02 | 432  | 701  | 0.62 | 0.04795 | 0.00051 | 0.14575  | 0.00229 | 0.02209 | 0.00025 | 98   | 21   | 138  | 2  | 141  | 2.0  | 1.0 |
| LSK107-03 | 4    | 760  | 0    | 0.05535 | 0.00030 | 0.151550 | 0.00711 | 0.06788 | 0.00091 | 428  | 13   | 422  | 5  | 423  | 5.0  | 1.0 |
| LSK107-04 | 222  | 365  | 0.61 | 0.04845 | 0.00043 | 0.14693  | 0.00201 | 0.02202 | 0.00021 | 120  | 20   | 139  | 2  | 140  | 1.0  | 1.0 |
| LSK107-05 | 27   | 447  | 0.06 | 0.05696 | 0.00038 | 0.156248 | 0.01903 | 0.06916 | 0.00118 | 500  | 15   | 453  | 12 | 431  | 7.0  | 1.0 |
| LSK107-06 | 161  | 131  | 1.23 | 0.04997 | 0.00090 | 0.15304  | 0.00295 | 0.02231 | 0.00023 | 195  | 43   | 145  | 3  | 142  | 1.0  | 1.0 |
| LSK107-07 | 199  | 130  | 1.53 | 0.05145 | 0.00101 | 0.15855  | 0.00332 | 0.02242 | 0.00023 | 261  | 44   | 149  | 3  | 143  | 1.0  | 1.0 |
| LSK107-08 | 135  | 118  | 1.14 | 0.05053 | 0.00072 | 0.15466  | 0.00257 | 0.02222 | 0.00020 | 220  | 33   | 146  | 2  | 142  | 1.0  | 1.0 |
| LSK107-09 | 73   | 645  | 0.11 | 0.05549 | 0.00018 | 0.152171 | 0.00493 | 0.06821 | 0.00061 | 432  | 3    | 426  | 3  | 425  | 4.0  | 1.0 |
| LSK107-10 | 156  | 296  | 0.53 | 0.06668 | 0.00023 | 0.151441 | 0.00954 | 0.12520 | 0.00093 | 828  | 7    | 778  | 5  | 760  | 5.0  | 1.0 |
| LSK107-11 | 215  | 126  | 1.71 | 0.10043 | 0.00029 | 0.190099 | 0.03124 | 0.28175 | 0.00222 | 1632 | 6    | 1614 | 6  | 1600 | 11.0 | 1.0 |
| LSK107-12 | 147  | 73   | 2.03 | 0.04995 | 0.00358 | 0.15290  | 0.01045 | 0.02228 | 0.00047 | 195  | 167  | 144  | 9  | 142  | 3.0  | 1.0 |
| LSK107-13 | 121  | 82   | 1.48 | 0.05117 | 0.00129 | 0.15650  | 0.00410 | 0.02223 | 0.00021 | 256  | 57   | 148  | 4  | 142  | 1.0  | 1.0 |
| LSK107-14 | 28   | 123  | 0.23 | 0.05659 | 0.00054 | 0.153256 | 0.00736 | 0.06820 | 0.00064 | 476  | 20   | 434  | 5  | 425  | 4.0  | 1.0 |
| LSK107-15 | 411  | 543  | 0.76 | 0.05124 | 0.00036 | 0.15795  | 0.00130 | 0.02239 | 0.00016 | 250  | 49   | 149  | 1  | 143  | 1.0  | 1.0 |
| LSK107-16 | 42   | 61   | 0.69 | 0.04857 | 0.00543 | 0.14505  | 0.01579 | 0.02177 | 0.00096 | 128  | 244  | 138  | 14 | 139  | 6.0  | 1.0 |
| LSK107-17 | 151  | 103  | 1.47 | 0.05101 | 0.00151 | 0.15808  | 0.00476 | 0.02248 | 0.00017 | 243  | 69   | 149  | 4  | 143  | 1.0  | 1.0 |
| LSK107-18 | 132  | 88   | 1.5  | 0.05107 | 0.00113 | 0.15852  | 0.00370 | 0.02252 | 0.00019 | 243  | 52   | 149  | 3  | 144  | 1.0  | 1.0 |
| LSK107-19 | 366  | 176  | 2.09 | 0.05173 | 0.00074 | 0.15886  | 0.00233 | 0.02234 | 0.00017 | 272  | 33   | 150  | 2  | 142  | 1.0  | 0.9 |
| LSK107-20 | 14   | 550  | 0.02 | 0.05588 | 0.00023 | 0.152440 | 0.00455 | 0.06805 | 0.00053 | 456  | 9    | 428  | 3  | 424  | 3.0  | 1.0 |
| LSK107-21 | 14   | 855  | 0.02 | 0.05553 | 0.00021 | 0.151946 | 0.00332 | 0.06783 | 0.00035 | 435  | 5    | 425  | 2  | 423  | 2.0  | 1.0 |
|           |      |      |      |         |         |          |         |         |         |      |      |      |    |      |      |     |
| MD06-01   | 249  | 203  | 1.22 | 0.04890 | 0.00272 | 0.14552  | 0.00788 | 0.02158 | 0.00027 | 143  | 100  | 138  | 7  | 138  | 2.0  | 1.0 |
| MD06-02   | 229  | 173  | 1.33 | 0.04879 | 0.00478 | 0.14358  | 0.01380 | 0.02134 | 0.00041 | 138  | 179  | 136  | 12 | 136  | 3.0  | 1.0 |
| MD06-04   | 120  | 129  | 0.93 | 0.05008 | 0.00604 | 0.14780  | 0.01753 | 0.02141 | 0.00050 | 199  | 224  | 140  | 16 | 137  | 3.0  | 1.0 |
| MD06-05   | 294  | 211  | 1.39 | 0.04888 | 0.00292 | 0.14619  | 0.00859 | 0.02169 | 0.00024 | 142  | 112  | 139  | 8  | 138  | 2.0  | 1.0 |
| MD06-06   | 2693 | 3909 | 0.69 | 0.04883 | 0.00083 | 0.14354  | 0.00215 | 0.02132 | 0.00015 | 140  | 22   | 136  | 2  | 136  | 1.0  | 1.0 |
| MD06-07   | 132  | 134  | 0.98 | 0.04942 | 0.00503 | 0.14443  | 0.01442 | 0.02120 | 0.00044 | 168  | 186  | 137  | 13 | 135  | 3.0  | 1.0 |
| MD06-08   | 81   | 99   | 0.81 | 0.04955 | 0.00506 | 0.14537  | 0.01461 | 0.02128 | 0.00040 | 174  | 191  | 138  | 13 | 136  | 3.0  | 1.0 |
| MD06-09   | 214  | 239  | 0.89 | 0.04857 | 0.00297 | 0.14448  | 0.00860 | 0.02158 | 0.00031 | 127  | 107  | 137  | 8  | 138  | 2.0  | 1.0 |
| MD06-10   | 68   | 111  | 0.61 | 0.04861 | 0.00528 | 0.14343  | 0.01541 | 0.02140 | 0.00035 | 129  | 211  | 136  | 14 | 136  | 2.0  | 1.0 |
| MD06-11   | 1379 | 1990 | 0.69 | 0.05015 | 0.00120 | 0.14750  | 0.00327 | 0.02133 | 0.00017 | 202  | 37   | 140  | 3  | 136  | 1.0  | 1.0 |
| MD06-12   | 301  | 254  | 1.19 | 0.04872 | 0.00298 | 0.14469  | 0.00869 | 0.02154 | 0.00024 | 134  | 114  | 137  | 8  | 137  | 2.0  | 1.0 |
| MD06-13   | 204  | 233  | 0.88 | 0.04911 | 0.00207 | 0.14622  | 0.00597 | 0.02160 | 0.00022 | 153  | 76   | 139  | 5  | 138  | 1.0  | 1.0 |
| MD06-14   | 192  | 171  | 1.13 | 0.04851 | 0.00341 | 0.14370  | 0.00994 | 0.02149 | 0.00027 | 124  | 131  | 136  | 9  | 137  | 2.0  | 1.0 |
| MD06-15   | 109  | 118  | 0.93 | 0.04928 | 0.00550 | 0.14526  | 0.01602 | 0.02138 | 0.00038 | 161  | 215  | 138  | 14 | 136  | 2.0  | 1.0 |
| MD06-16   | 266  | 214  | 1.24 | 0.04910 | 0.00241 | 0.14437  | 0.00689 | 0.02133 | 0.00024 | 153  | 89   | 137  | 6  | 136  | 2.0  | 1.0 |
| MD06-17   | 121  | 137  | 0.88 | 0.04840 | 0.00749 | 0.14232  | 0.02161 | 0.02133 | 0.00066 | 119  | 256  | 135  | 19 | 136  | 4.0  | 1.0 |
| MD06-18   | 229  | 168  | 1.36 | 0.04869 | 0.00524 | 0.14360  | 0.01519 | 0.02139 | 0.00043 | 133  | 199  | 136  | 13 | 136  | 3.0  | 1.0 |
| MD06-19   | 128  | 171  | 0.75 | 0.04937 | 0.00646 | 0.14526  | 0.01867 | 0.02134 | 0.00056 | 165  | 237  | 138  | 17 | 136  | 4.0  | 1.0 |
| MD06-20   | 114  | 108  | 1.05 | 0.04873 | 0.00523 | 0.14388  | 0.01524 | 0.02142 | 0.00039 | 135  | 204  | 136  | 14 | 137  | 2.0  | 1.0 |
| MD06-21   | 461  | 264  | 1.74 | 0.04890 | 0.00307 | 0.14422  | 0.00884 | 0.02139 | 0.00030 | 143  | 112  | 137  | 8  | 136  | 2.0  | 1.0 |
| MD06-22   | 96   | 88   | 1.09 | 0.04876 | 0.00633 | 0.14384  | 0.01843 | 0.02140 | 0.00046 | 136  | 241  | 136  | 16 | 136  | 3.0  | 1.0 |
| MD06-23   | 224  | 231  | 0.97 | 0.04888 | 0.00270 | 0.14358  | 0.00774 | 0.02131 | 0.00024 | 142  | 102  | 136  | 7  | 136  | 2.0  | 1.0 |
| MD06-24   | 624  | 563  | 1.11 | 0.04868 | 0.00181 | 0.14365  | 0.00514 | 0.02141 | 0.00021 | 132  | 65   | 136  | 5  | 137  | 1.0  | 1.0 |
| MD06-25   | 130  | 124  | 1.05 | 0.04930 | 0.00374 | 0.14531  | 0.01080 | 0.02138 | 0.00032 | 162  | 140  | 138  | 10 | 136  | 2.0  | 1.0 |
| MD06-26   | 160  | 151  | 1.06 | 0.04914 | 0.00322 | 0.14465  | 0.00928 | 0.02135 | 0.00028 | 155  | 120  | 137  | 8  | 136  | 2.0  | 1.0 |
| MD06-27   | 265  | 223  | 1.19 | 0.04892 | 0.00311 | 0.14394  | 0.00892 | 0.02134 | 0.00031 | 144  | 113  | 137  | 8  | 136  | 2.0  | 1.0 |
| MD06-28   | 175  | 148  | 1.18 | 0.04877 | 0.00396 | 0.14340  | 0.01140 | 0.02133 | 0.00035 | 137  | 147  | 136  | 10 | 136  | 2.0  | 1.0 |
| MD06-29   | 177  | 149  | 1.18 | 0.04871 | 0.00500 | 0.14352  | 0.01452 | 0.02137 | 0.00040 | 134  | 191  | 136  | 13 | 136  | 3.0  | 1.0 |

|            |      |      |      |         |         |         |         |         |         |     |     |     |    |     |     |     |
|------------|------|------|------|---------|---------|---------|---------|---------|---------|-----|-----|-----|----|-----|-----|-----|
| MD06-30    | 227  | 185  | 1.23 | 0.04944 | 0.00282 | 0.14533 | 0.00807 | 0.02132 | 0.00027 | 169 | 103 | 138 | 7  | 136 | 2.0 | 1.0 |
| MD06-31    | 417  | 373  | 1.12 | 0.04931 | 0.00192 | 0.14495 | 0.00543 | 0.02133 | 0.00021 | 163 | 69  | 137 | 5  | 136 | 1.0 | 1.0 |
| MD06-32    | 267  | 185  | 1.44 | 0.04909 | 0.00270 | 0.14555 | 0.00783 | 0.02151 | 0.00023 | 152 | 103 | 138 | 7  | 137 | 1.0 | 1.0 |
| MD06-33    | 884  | 869  | 1.02 | 0.04838 | 0.00185 | 0.14348 | 0.00526 | 0.02151 | 0.00022 | 118 | 66  | 136 | 5  | 137 | 1.0 | 1.0 |
| MD06-34    | 886  | 1100 | 0.81 | 0.04920 | 0.00182 | 0.14509 | 0.00514 | 0.02139 | 0.00022 | 157 | 64  | 138 | 5  | 136 | 1.0 | 1.0 |
| MD06-35    | 373  | 429  | 0.87 | 0.04959 | 0.00195 | 0.14582 | 0.00553 | 0.02133 | 0.00021 | 176 | 70  | 138 | 5  | 136 | 1.0 | 1.0 |
| MD06-36    | 147  | 145  | 1.01 | 0.04911 | 0.00443 | 0.14496 | 0.01288 | 0.02141 | 0.00034 | 153 | 170 | 137 | 11 | 137 | 2.0 | 1.0 |
| MD06-37    | 1787 | 1579 | 1.13 | 0.04940 | 0.00119 | 0.14664 | 0.00329 | 0.02153 | 0.00017 | 167 | 38  | 139 | 3  | 137 | 1.0 | 1.0 |
| MD06-38    | 133  | 124  | 1.07 | 0.04884 | 0.00422 | 0.14363 | 0.01224 | 0.02133 | 0.00031 | 140 | 164 | 136 | 11 | 136 | 2.0 | 1.0 |
| MD06-39    | 313  | 205  | 1.53 | 0.04890 | 0.00363 | 0.14414 | 0.01046 | 0.02138 | 0.00034 | 143 | 133 | 137 | 9  | 136 | 2.0 | 1.0 |
| MD06-41    | 300  | 288  | 1.04 | 0.05016 | 0.00314 | 0.14857 | 0.00905 | 0.02149 | 0.00030 | 202 | 114 | 141 | 8  | 137 | 2.0 | 1.0 |
| SH10-15-01 | 316  | 907  | 0.35 | 0.04965 | 0.00122 | 0.13773 | 0.00315 | 0.02013 | 0.00016 | 179 | 38  | 131 | 3  | 128 | 1.0 | 1.0 |
| SH10-15-02 | 294  | 1112 | 0.26 | 0.05024 | 0.00163 | 0.13872 | 0.00428 | 0.02003 | 0.00018 | 206 | 55  | 132 | 4  | 128 | 1.0 | 1.0 |
| SH10-15-03 | 253  | 866  | 0.29 | 0.04877 | 0.00133 | 0.13598 | 0.00350 | 0.02023 | 0.00016 | 137 | 46  | 129 | 3  | 129 | 1.0 | 1.0 |
| SH10-15-04 | 958  | 2047 | 0.47 | 0.05082 | 0.00110 | 0.14283 | 0.00281 | 0.02039 | 0.00015 | 233 | 32  | 136 | 2  | 130 | 1.0 | 1.0 |
| SH10-15-05 | 453  | 606  | 0.75 | 0.04818 | 0.00216 | 0.14682 | 0.00635 | 0.02211 | 0.00024 | 108 | 78  | 139 | 6  | 141 | 2.0 | 1.0 |
| SH10-15-06 | 567  | 1948 | 0.29 | 0.04841 | 0.00172 | 0.14722 | 0.00500 | 0.02206 | 0.00021 | 119 | 62  | 139 | 4  | 141 | 1.0 | 1.0 |
| SH10-15-07 | 625  | 2272 | 0.28 | 0.05255 | 0.00131 | 0.15821 | 0.00365 | 0.02184 | 0.00017 | 309 | 38  | 149 | 3  | 139 | 1.0 | 0.9 |
| SH10-15-08 | 347  | 664  | 0.52 | 0.05182 | 0.00137 | 0.14334 | 0.00353 | 0.02007 | 0.00016 | 277 | 42  | 136 | 3  | 128 | 1.0 | 0.9 |
| SH10-15-09 | 724  | 1210 | 0.6  | 0.04842 | 0.00175 | 0.14775 | 0.00512 | 0.02214 | 0.00021 | 120 | 63  | 140 | 5  | 141 | 1.0 | 1.0 |
| SH10-15-10 | 695  | 2491 | 0.28 | 0.05007 | 0.00096 | 0.13945 | 0.00239 | 0.02021 | 0.00014 | 198 | 27  | 133 | 2  | 129 | 1.0 | 1.0 |
| SH10-15-11 | 729  | 1774 | 0.41 | 0.04976 | 0.00086 | 0.13965 | 0.00210 | 0.02036 | 0.00014 | 184 | 22  | 133 | 2  | 130 | 1.0 | 1.0 |
| SH10-15-12 | 576  | 1597 | 0.36 | 0.04886 | 0.00087 | 0.13693 | 0.00213 | 0.02033 | 0.00014 | 141 | 24  | 130 | 2  | 130 | 1.0 | 1.0 |
| SH10-15-13 | 869  | 2134 | 0.41 | 0.05043 | 0.00098 | 0.13941 | 0.00242 | 0.02006 | 0.00014 | 215 | 27  | 133 | 2  | 128 | 1.0 | 1.0 |
| SH10-15-14 | 515  | 1578 | 0.33 | 0.04959 | 0.00217 | 0.15077 | 0.00635 | 0.02206 | 0.00024 | 176 | 78  | 143 | 6  | 141 | 2.0 | 1.0 |
| SH10-15-15 | 1097 | 2320 | 0.47 | 0.04940 | 0.00157 | 0.15012 | 0.00453 | 0.02205 | 0.00020 | 167 | 53  | 142 | 4  | 141 | 1.0 | 1.0 |
| SH10-15-16 | 1030 | 2659 | 0.39 | 0.05344 | 0.00083 | 0.14948 | 0.00195 | 0.02029 | 0.00013 | 348 | 18  | 141 | 2  | 130 | 1.0 | 0.9 |
| SH10-15-17 | 595  | 2093 | 0.28 | 0.05016 | 0.00129 | 0.15344 | 0.00367 | 0.02219 | 0.00018 | 202 | 40  | 145 | 3  | 141 | 1.0 | 1.0 |
| SH10-15-18 | 879  | 2161 | 0.41 | 0.04850 | 0.00076 | 0.13408 | 0.00176 | 0.02006 | 0.00013 | 124 | 19  | 128 | 2  | 128 | 1.0 | 1.0 |
| SH10-15-19 | 171  | 369  | 0.46 | 0.04990 | 0.00211 | 0.15181 | 0.00619 | 0.02207 | 0.00022 | 190 | 76  | 144 | 5  | 141 | 1.0 | 1.0 |
| SH10-15-20 | 207  | 535  | 0.39 | 0.05020 | 0.00228 | 0.15209 | 0.00666 | 0.02198 | 0.00025 | 204 | 81  | 144 | 6  | 140 | 2.0 | 1.0 |
| SH10-15-21 | 933  | 2151 | 0.43 | 0.05018 | 0.00160 | 0.15083 | 0.00457 | 0.02181 | 0.00020 | 203 | 53  | 143 | 4  | 139 | 1.0 | 1.0 |
| SH10-15-22 | 163  | 248  | 0.66 | 0.04845 | 0.00389 | 0.14645 | 0.01150 | 0.02193 | 0.00037 | 121 | 144 | 139 | 10 | 140 | 2.0 | 1.0 |
| SH10-15-23 | 817  | 1867 | 0.44 | 0.05419 | 0.00206 | 0.16381 | 0.00595 | 0.02193 | 0.00023 | 379 | 63  | 154 | 5  | 140 | 1.0 | 0.9 |
| SH10-15-24 | 788  | 2003 | 0.39 | 0.05228 | 0.00107 | 0.14506 | 0.00266 | 0.02013 | 0.00015 | 298 | 28  | 138 | 2  | 129 | 1.0 | 0.9 |
| SH10-15-25 | 1270 | 2849 | 0.45 | 0.04965 | 0.00090 | 0.13768 | 0.00219 | 0.02012 | 0.00014 | 179 | 24  | 131 | 2  | 128 | 1.0 | 1.0 |
| SH10-15-26 | 989  | 2465 | 0.4  | 0.04931 | 0.00075 | 0.13544 | 0.00172 | 0.01993 | 0.00013 | 163 | 18  | 129 | 2  | 127 | 1.0 | 1.0 |
| SH10-15-27 | 966  | 2121 | 0.46 | 0.04936 | 0.00119 | 0.13739 | 0.00316 | 0.02019 | 0.00014 | 165 | 58  | 131 | 3  | 129 | 1.0 | 1.0 |
| SH10-15-28 | 686  | 1852 | 0.37 | 0.04965 | 0.00189 | 0.14064 | 0.00511 | 0.02055 | 0.00021 | 179 | 66  | 134 | 5  | 131 | 1.0 | 1.0 |
| SH10-15-29 | 833  | 1959 | 0.43 | 0.04884 | 0.00125 | 0.13470 | 0.00321 | 0.02001 | 0.00016 | 140 | 41  | 128 | 3  | 128 | 1.0 | 1.0 |
| SH10-15-30 | 735  | 1248 | 0.59 | 0.04950 | 0.00126 | 0.13857 | 0.00329 | 0.02031 | 0.00016 | 172 | 41  | 132 | 3  | 130 | 1.0 | 1.0 |
| SH10-15-32 | 553  | 1112 | 0.5  | 0.05030 | 0.00110 | 0.14093 | 0.00281 | 0.02033 | 0.00015 | 209 | 32  | 134 | 3  | 130 | 1.0 | 1.0 |
| SH10-15-33 | 1158 | 1957 | 0.59 | 0.04912 | 0.00162 | 0.14832 | 0.00464 | 0.02191 | 0.00020 | 154 | 56  | 140 | 4  | 140 | 1.0 | 1.0 |
| SH10-15-34 | 703  | 1707 | 0.41 | 0.05074 | 0.00131 | 0.14274 | 0.00342 | 0.02041 | 0.00016 | 229 | 41  | 135 | 3  | 130 | 1.0 | 1.0 |
| SH10-15-35 | 1087 | 2852 | 0.38 | 0.04779 | 0.00134 | 0.14540 | 0.00382 | 0.02207 | 0.00018 | 89  | 47  | 138 | 3  | 141 | 1.0 | 1.0 |
| SH10-15-37 | 613  | 1643 | 0.37 | 0.04765 | 0.00203 | 0.14472 | 0.00594 | 0.02203 | 0.00024 | 82  | 71  | 137 | 5  | 140 | 2.0 | 1.0 |
| SH10-15-38 | 522  | 1807 | 0.29 | 0.04877 | 0.00205 | 0.14678 | 0.00594 | 0.02183 | 0.00023 | 137 | 75  | 139 | 5  | 139 | 1.0 | 1.0 |
| SH10-15-39 | 666  | 1612 | 0.41 | 0.04937 | 0.00107 | 0.13717 | 0.00272 | 0.02016 | 0.00015 | 165 | 32  | 131 | 2  | 129 | 1.0 | 1.0 |
| SH10-15-40 | 620  | 1755 | 0.35 | 0.04877 | 0.00163 | 0.14752 | 0.00468 | 0.02194 | 0.00020 | 137 | 57  | 140 | 4  | 140 | 1.0 | 1.0 |
| SH10-15-41 | 241  | 312  | 0.77 | 0.04836 | 0.00284 | 0.13725 | 0.00783 | 0.02059 | 0.00027 | 117 | 104 | 131 | 7  | 131 | 2.0 | 1.0 |
| SH10-15-42 | 980  | 2242 | 0.44 | 0.04707 | 0.00185 | 0.14290 | 0.00539 | 0.02203 | 0.00022 | 53  | 64  | 136 | 5  | 140 | 1.0 | 1.0 |
| SH10-15-43 | 530  | 1444 | 0.37 | 0.05005 | 0.00138 | 0.15064 | 0.00390 | 0.02183 | 0.00018 | 197 | 45  | 142 | 3  | 139 | 1.0 | 1.0 |
| SH10-15-44 | 353  | 1240 | 0.28 | 0.04857 | 0.00132 | 0.13487 | 0.00345 | 0.02014 | 0.00016 | 127 | 45  | 128 | 3  | 129 | 1.0 | 1.0 |
| SH10-27-01 | 1771 | 2892 | 0.61 | 0.04955 | 0.00090 | 0.15471 | 0.00248 | 0.02276 | 0.00016 | 174 | 24  | 146 | 2  | 145 | 1.0 | 1.0 |
| SH10-27-02 | 2997 | 4581 | 0.65 | 0.04970 | 0.00115 | 0.15457 | 0.00329 | 0.02266 | 0.00018 | 181 | 35  | 146 | 3  | 144 | 1.0 | 1.0 |
| SH10-27-03 | 980  | 1695 | 0.58 | 0.04727 | 0.00118 | 0.14480 | 0.00336 | 0.02232 | 0.00018 | 63  | 39  | 137 | 3  | 142 | 1.0 | 1.0 |
| SH10-27-04 | 2079 | 3329 | 0.62 | 0.04878 | 0.00112 | 0.14869 | 0.00315 | 0.02220 | 0.00017 | 137 | 35  | 141 | 3  | 142 | 1.0 | 1.0 |
| SH10-27-05 | 2972 | 3557 | 0.84 | 0.05182 | 0.00112 | 0.15747 | 0.00312 | 0.02214 | 0.00017 | 277 | 31  | 148 | 3  | 141 | 1.0 | 1.0 |
| SH10-27-06 | 1666 | 3053 | 0.55 | 0.04903 | 0.00108 | 0.15107 | 0.00305 | 0.02244 | 0.00017 | 149 | 33  | 143 | 3  | 143 | 1.0 | 1.0 |
| SH10-27-07 | 1412 | 2245 | 0.63 | 0.04900 | 0.00092 | 0.15281 | 0.00255 | 0.02271 | 0.00016 | 148 | 26  | 144 | 2  | 145 | 1.0 | 1.0 |
| SH10-27-08 | 2627 | 3477 | 0.76 | 0.04721 | 0.00094 | 0.14818 | 0.00265 | 0.02285 | 0.00017 | 60  | 28  | 140 | 2  | 146 | 1.0 | 1.0 |
| SH10-27-09 | 1876 | 3383 | 0.55 | 0.04764 | 0.00094 | 0.14703 | 0.00261 | 0.02247 | 0.00016 | 81  | 29  | 139 | 2  | 143 | 1.0 | 1.0 |
| SH10-27-10 | 1433 | 2372 | 0.6  | 0.04825 | 0.00107 | 0.14695 | 0.00299 | 0.02217 | 0.00017 | 112 | 33  | 139 | 3  | 141 | 1.0 | 1.0 |
| SH10-27-11 | 2204 | 2630 | 0.84 | 0.05196 | 0.00112 | 0.15914 | 0.00314 | 0.02229 | 0.00017 | 284 | 31  | 150 | 3  | 142 | 1.0 | 0.9 |
| SH10-27-12 | 63   | 122  | 0.52 | 0.05550 | 0.00171 | 0.54444 | 0.01600 | 0.07138 | 0.00065 | 432 | 49  | 141 | 11 | 144 | 4.0 | 1.0 |
| SH10-27-13 | 3496 | 3800 | 0.92 | 0.04900 | 0.00099 | 0.15234 | 0.00279 | 0.02261 | 0.00017 | 148 | 29  | 144 | 2  | 144 | 1.0 | 1.0 |
| SH10-27-14 | 1098 | 1838 | 0.6  | 0.04770 | 0.00162 | 0.14630 | 0.00475 | 0.02230 | 0.00021 | 84  | 57  | 139 | 4  | 142 | 1.0 | 1.0 |
| SH10-27-15 | 1384 | 2238 | 0.62 | 0.04799 | 0.00132 | 0.14871 | 0.00386 | 0.02253 | 0.00019 | 99  | 45  | 141 | 3  | 144 | 1.0 | 1.0 |
| SH10-27-16 | 1563 | 1981 | 0.79 | 0.04830 | 0.00132 | 0.15251 | 0.00392 | 0.02295 | 0.00019 | 114 | 45  | 144 | 3  | 146 | 1.0 | 1.0 |
| SH10-27-17 | 1635 | 2805 | 0.58 | 0.04796 | 0.00096 | 0.14835 | 0.00270 | 0.02248 | 0.00016 | 97  | 30  | 140 | 2  | 143 | 1.0 | 1.0 |
| SH10-27-18 | 1430 | 2204 | 0.65 | 0.04636 | 0.00118 | 0.14359 | 0.00342 | 0.02250 | 0.00018 | 16  | 36  | 136 | 3  | 143 | 1.0 | 1.1 |
| SH10-27-19 | 1498 | 2358 | 0.64 | 0.04645 | 0.00154 | 0.14557 | 0.00461 | 0.02277 | 0.00021 | 21  | 50  | 138 | 4  | 145 | 1.0 | 1.1 |
| SH10-27-20 | 2881 | 3697 | 0.78 | 0.04793 | 0.00088 | 0.14956 | 0.00245 | 0.02267 | 0.00016 | 96  | 25  | 142 | 2  | 145 | 1.0 | 1.0 |
| SH10-27-21 | 3072 | 3705 | 0.83 | 0.04806 |         |         |         |         |         |     |     |     |    |     |     |     |

|            |     |      |      |         |         |         |         |         |         |         |         |      |     |      |    |       |      |     |     |     |
|------------|-----|------|------|---------|---------|---------|---------|---------|---------|---------|---------|------|-----|------|----|-------|------|-----|-----|-----|
| XS-30-1-01 | 95  | 182  | 0.52 | 0.11010 | 0.03080 | 0.36000 | 0.09950 | 0.02371 | 0.00100 | 0.00686 | 0.00054 | 1801 | 606 | 312  | 74 | 151   | 6.0  | 138 | 11  | 0.5 |
| XS-30-1-02 | 228 | 231  | 0.99 | 0.05940 | 0.00390 | 0.16050 | 0.01020 | 0.01961 | 0.00042 | 0.00661 | 0.00070 | 581  | 100 | 151  | 9  | 125   | 3.0  | 133 | 14  | 0.8 |
| XS-30-1-03 | 62  | 71   | 0.88 | 0.04950 | 0.00990 | 0.14220 | 0.02820 | 0.02085 | 0.00069 | 0.00761 | 0.00106 | 171  | 320 | 135  | 25 | 133   | 4.0  | 153 | 21  | 1.0 |
| XS-30-1-04 | 236 | 286  | 0.82 | 0.05060 | 0.00310 | 0.14040 | 0.00840 | 0.02013 | 0.00039 | 0.00664 | 0.00069 | 222  | 102 | 133  | 7  | 128   | 2.0  | 134 | 14  | 1.0 |
| XS-30-1-05 | 309 | 390  | 0.79 | 0.04930 | 0.00240 | 0.13860 | 0.00670 | 0.02041 | 0.00037 | 0.00665 | 0.00063 | 161  | 79  | 132  | 6  | 130   | 2.0  | 134 | 13  | 1.0 |
| XS-30-1-06 | 155 | 414  | 0.37 | 0.04930 | 0.00250 | 0.14190 | 0.00710 | 0.02089 | 0.00039 | 0.00710 | 0.00067 | 161  | 81  | 135  | 6  | 133   | 2.0  | 143 | 13  | 1.0 |
| XS-30-1-07 | 506 | 1204 | 0.42 | 0.04760 | 0.00140 | 0.14400 | 0.00430 | 0.02195 | 0.00036 | 0.00497 | 0.00031 | 79   | 41  | 137  | 4  | 140   | 2.0  | 100 | 6   | 1.0 |
| XS-30-1-08 | 548 | 2049 | 0.27 | 0.05000 | 0.00100 | 0.14550 | 0.00310 | 0.02111 | 0.00032 | 0.00679 | 0.00050 | 195  | 24  | 138  | 3  | 135   | 2.0  | 137 | 10  | 1.0 |
| XS-30-1-09 | 262 | 699  | 0.38 | 0.05140 | 0.00150 | 0.15260 | 0.00460 | 0.02155 | 0.00035 | 0.00649 | 0.00045 | 257  | 40  | 144  | 4  | 137   | 2.0  | 131 | 9   | 1.0 |
| XS-30-1-10 | 687 | 1534 | 0.45 | 0.04980 | 0.00120 | 0.15120 | 0.00370 | 0.02204 | 0.00034 | 0.00636 | 0.00043 | 184  | 30  | 143  | 3  | 141   | 2.0  | 128 | 9   | 1.0 |
| XS-30-1-11 | 224 | 609  | 0.37 | 0.05090 | 0.00170 | 0.14660 | 0.00500 | 0.02092 | 0.00034 | 0.00712 | 0.00061 | 234  | 49  | 139  | 4  | 133   | 2.0  | 143 | 12  | 1.0 |
| XS-30-1-12 | 266 | 483  | 0.55 | 0.05250 | 0.00180 | 0.15530 | 0.00540 | 0.02146 | 0.00035 | 0.00629 | 0.00066 | 307  | 49  | 147  | 5  | 137   | 2.0  | 127 | 13  | 0.9 |
| XS-30-1-13 | 586 | 1967 | 0.30 | 0.04940 | 0.00120 | 0.14800 | 0.00370 | 0.02172 | 0.00034 | 0.00691 | 0.00080 | 168  | 31  | 140  | 3  | 139   | 2.0  | 139 | 16  | 1.0 |
| XS-30-1-14 | 460 | 377  | 1.22 | 0.04890 | 0.00210 | 0.14330 | 0.00610 | 0.02126 | 0.00036 | 0.00636 | 0.00068 | 143  | 68  | 136  | 5  | 136   | 2.0  | 128 | 14  | 1.0 |
| XS-30-1-15 | 234 | 223  | 1.05 | 0.05040 | 0.00330 | 0.14230 | 0.00920 | 0.02047 | 0.00039 | 0.00725 | 0.00097 | 213  | 113 | 135  | 8  | 131   | 2.0  | 146 | 19  | 1.0 |
| XS-30-1-16 | 262 | 260  | 1.01 | 0.04960 | 0.00290 | 0.14390 | 0.00850 | 0.02105 | 0.00040 | 0.00657 | 0.00080 | 176  | 100 | 136  | 8  | 134   | 3.0  | 132 | 16  | 1.0 |
| XS-30-1-17 | 7   | 238  | 0.03 | 0.12120 | 0.00230 | 4.63980 | 0.09630 | 0.27773 | 0.00415 | 0.02414 | 0.00726 | 1974 | 18  | 1756 | 17 | 1580  | 21.0 | 482 | 143 | 0.9 |
| XS-30-1-18 | 216 | 684  | 0.32 | 0.04980 | 0.00150 | 0.14640 | 0.00440 | 0.02134 | 0.00033 | 0.00773 | 0.00128 | 185  | 42  | 139  | 4  | 136   | 2.0  | 156 | 26  | 1.0 |
| XS-30-1-19 | 74  | 107  | 0.70 | 0.04980 | 0.00640 | 0.14300 | 0.01810 | 0.02083 | 0.00054 | 0.00894 | 0.00227 | 186  | 233 | 136  | 16 | 133   | 3.0  | 180 | 45  | 1.0 |
| XS-30-1-20 | 137 | 277  | 0.50 | 0.04910 | 0.00260 | 0.14520 | 0.00770 | 0.02145 | 0.00038 | 0.00639 | 0.00088 | 153  | 88  | 138  | 7  | 137   | 2.0  | 129 | 18  | 1.0 |
| XS-30-1-21 | 439 | 1310 | 0.34 | 0.04910 | 0.00130 | 0.14470 | 0.00390 | 0.02139 | 0.00033 | 0.00770 | 0.00151 | 151  | 35  | 137  | 3  | 136   | 2.0  | 155 | 30  | 1.0 |
| XS-30-1-22 | 228 | 331  | 0.69 | 0.05730 | 0.00310 | 0.17200 | 0.00930 | 0.02176 | 0.00044 | 0.00760 | 0.00136 | 505  | 83  | 161  | 8  | 139   | 3.0  | 153 | 27  | 0.9 |
| XS-30-1-23 | 577 | 1648 | 0.35 | 0.04890 | 0.00130 | 0.14110 | 0.00370 | 0.02093 | 0.00033 | 0.00807 | 0.00183 | 144  | 33  | 134  | 3  | 134   | 2.0  | 162 | 37  | 1.0 |
|            |     |      |      |         |         |         |         |         |         |         |         |      |     |      |    |       |      |     |     |     |
| XS-30-3-11 | 244 | 1303 | 0.19 | 0.04640 | 0.00110 | 0.13630 | 0.00340 | 0.02132 | 0.00021 |         |         | 17   | 57  |      |    | 136.4 | 1.3  | 126 | 6.1 |     |
| XS-30-3-12 | 334 | 1664 | 0.21 | 0.04880 | 0.00060 | 0.14510 | 0.00230 | 0.02157 | 0.00021 |         |         | 137  | 29  |      |    | 137.6 | 1.3  | 131 | 2.9 |     |
| XS-30-3-2  | 90  | 292  | 0.32 | 0.04860 | 0.00290 | 0.14060 | 0.00860 | 0.02098 | 0.00025 |         |         | 129  | 140 |      |    | 133.8 | 1.6  | 136 | 10  |     |
| XS-30-3-3  | 114 | 620  | 0.19 | 0.05280 | 0.00080 | 0.15920 | 0.00300 | 0.02186 | 0.00022 |         |         | 320  | 37  |      |    | 138.7 | 1.4  | 168 | 4.9 |     |
| XS-30-3-4  | 421 | 910  | 0.48 | 0.04770 | 0.00110 | 0.13760 | 0.00360 | 0.02091 | 0.00209 |         |         | 85   | 58  |      |    | 133.6 | 1.3  | 128 | 3.1 |     |
| XS-30-3-5  | 385 | 738  | 0.54 | 0.04980 | 0.00150 | 0.14340 | 0.00460 | 0.02090 | 0.00021 |         |         | 184  | 70  |      |    | 133.2 | 1.3  | 134 | 3.5 |     |
| XS-30-3-6  | 205 | 638  | 0.33 | 0.05140 | 0.00110 | 0.14990 | 0.00340 | 0.02115 | 0.00021 |         |         | 258  | 48  |      |    | 134.5 | 1.4  | 139 | 3.8 |     |
| XS-30-3-7  | 82  | 171  | 0.49 | 0.04690 | 0.00610 | 0.13400 | 0.01740 | 0.02079 | 0.00031 |         |         | 42   | 300 |      |    | 133   | 1.8  | 131 | 13  |     |
|            |     |      |      |         |         |         |         |         |         |         |         |      |     |      |    |       |      |     |     |     |
| RYT03-01   | 219 | 857  | 0.26 | 0.04871 | 0.00136 | 0.14525 | 0.00403 | 0.02175 | 0.00027 | 0.00689 | 0.00023 |      |     | 138  | 4  | 139   | 2.0  |     |     | 1.0 |
| RYT03-02   | 298 | 1247 | 0.24 | 0.04624 | 0.00094 | 0.13675 | 0.00279 | 0.02139 | 0.00015 | 0.00685 | 0.00015 |      |     | 130  | 2  | 136   | 1.0  |     |     | 1.0 |
| RYT03-06   | 512 | 1613 | 0.32 | 0.04737 | 0.00119 | 0.14154 | 0.00361 | 0.02161 | 0.00024 | 0.00665 | 0.00021 |      |     | 134  | 3  | 138   | 1.0  |     |     | 1.0 |
| RYT03-07   | 921 | 4146 | 0.22 | 0.04789 | 0.00110 | 0.14240 | 0.00311 | 0.02152 | 0.00021 | 0.00733 | 0.00023 |      |     | 135  | 3  | 137   | 1.0  |     |     | 1.0 |
| RYT03-09   | 723 | 3609 | 0.20 | 0.05317 | 0.00068 | 0.15841 | 0.00199 | 0.02145 | 0.00012 | 0.00756 | 0.00013 |      |     | 149  | 2  | 137   | 1.0  |     |     | 0.9 |
| RYT03-10   | 356 | 2007 | 0.18 | 0.05038 | 0.00133 | 0.15021 | 0.00375 | 0.02151 | 0.00023 | 0.00652 | 0.00024 |      |     | 142  | 3  | 137   | 1.0  |     |     | 1.0 |
| RYT03-11   | 288 | 427  | 0.67 | 0.04976 | 0.00130 | 0.15090 | 0.00375 | 0.02202 | 0.00018 | 0.00725 | 0.00015 |      |     | 143  | 3  | 140   | 1.0  |     |     | 1.0 |
| RYT03-16   | 518 | 2409 | 0.21 | 0.04846 | 0.00113 | 0.14305 | 0.00332 | 0.02129 | 0.00019 | 0.00722 | 0.00022 |      |     | 136  | 3  | 136   | 1.0  |     |     | 1.0 |
| RYT03-17   | 192 | 718  | 0.27 | 0.05013 | 0.00115 | 0.15019 | 0.00332 | 0.02170 | 0.00018 | 0.00705 | 0.00019 |      |     | 142  | 3  | 138   | 1.0  |     |     | 1.0 |
| RYT03-19   | 172 | 552  | 0.31 | 0.05081 | 0.00117 | 0.15250 | 0.00334 | 0.02180 | 0.00018 | 0.00753 | 0.00020 |      |     | 144  | 3  | 139   | 1.0  |     |     | 1.0 |
| RYT03-22   | 664 | 4244 | 0.16 | 0.04916 | 0.00123 | 0.14424 | 0.00356 | 0.02116 | 0.00026 | 0.00673 | 0.00023 |      |     | 137  | 3  | 135   | 2.0  |     |     | 1.0 |
| RYT03-24   | 276 | 999  | 0.28 | 0.04968 | 0.00105 | 0.14647 | 0.00292 | 0.02141 | 0.00018 | 0.00727 | 0.00016 |      |     | 139  | 3  | 137   | 1.0  |     |     | 1.0 |
| RYT03-25   | 311 | 1396 | 0.22 | 0.04843 | 0.00135 | 0.14314 | 0.00394 | 0.02142 | 0.00025 | 0.00692 | 0.00023 |      |     | 136  | 4  | 137   | 2.0  |     |     | 1.0 |
| RYT03-26   | 520 | 2169 | 0.24 | 0.04910 | 0.00169 | 0.14216 | 0.00531 | 0.02085 | 0.00027 | 0.00685 | 0.00036 |      |     | 135  | 5  | 133   | 2.0  |     |     | 1.0 |
| RYT03-28   | 703 | 2793 | 0.25 | 0.04888 | 0.00064 | 0.14672 | 0.00205 | 0.02164 | 0.00015 | 0.00719 | 0.00013 |      |     | 139  | 2  | 138   | 1.0  |     |     | 1.0 |
|            |     |      |      |         |         |         |         |         |         |         |         |      |     |      |    |       |      |     |     |     |
| RYT04-01   | 122 | 428  | 0.29 | 0.04994 | 0.00231 | 0.14671 | 0.00648 | 0.02152 | 0.00029 | 0.00670 | 0.00032 |      |     | 139  | 6  | 137   | 2.0  |     |     | 1.0 |
| RYT04-02   | 111 | 199  | 0.56 | 0.04975 | 0.00213 | 0.14395 | 0.00597 | 0.02107 | 0.00032 | 0.00642 | 0.00028 |      |     | 137  | 5  | 134   | 2.0  |     |     | 1.0 |
| RYT04-04   | 160 | 470  | 0.34 | 0.04610 | 0.00185 | 0.13399 | 0.00525 | 0.02113 | 0.00028 | 0.00621 | 0.00024 |      |     | 128  | 5  | 135   | 2.0  |     |     | 1.1 |
| RYT04-05   | 203 | 682  | 0.30 | 0.04843 | 0.00137 | 0.14543 | 0.00473 | 0.      |         |         |         |      |     |      |    |       |      |     |     |     |



|            |      |      |      |         |         |         |         |         |         |         |         |      |      |       |     |       |     |
|------------|------|------|------|---------|---------|---------|---------|---------|---------|---------|---------|------|------|-------|-----|-------|-----|
| RYT06-01   | 109  | 134  | 0.81 | 0.05269 | 0.00217 | 0.15492 | 0.00629 | 0.02148 | 0.00026 | 0.00710 | 0.00021 | 146  | 6    | 137   | 2.0 | 0.9   |     |
| RYT06-03   | 321  | 402  | 0.80 | 0.05089 | 0.00171 | 0.14975 | 0.00523 | 0.02117 | 0.00026 | 0.00636 | 0.00020 | 142  | 5    | 135   | 2.0 | 1.0   |     |
| RYT06-04   | 181  | 272  | 0.66 | 0.05324 | 0.00219 | 0.15468 | 0.00617 | 0.02109 | 0.00030 | 0.00714 | 0.00024 | 146  | 5    | 135   | 2.0 | 0.9   |     |
| RYT06-05   | 161  | 633  | 0.25 | 0.04839 | 0.00210 | 0.14158 | 0.00616 | 0.02121 | 0.00037 | 0.00740 | 0.00033 | 134  | 5    | 135   | 2.0 | 1.0   |     |
| RYT06-06   | 85   | 134  | 0.63 | 0.05404 | 0.00186 | 0.16027 | 0.00509 | 0.02177 | 0.00024 | 0.00709 | 0.00022 | 151  | 4    | 139   | 2.0 | 0.9   |     |
| RYT06-10   | 111  | 134  | 0.83 | 0.04798 | 0.00377 | 0.14239 | 0.01189 | 0.02124 | 0.00054 | 0.00648 | 0.00037 | 135  | 11   | 136   | 3.0 | 1.0   |     |
| RYT06-14   | 148  | 340  | 0.43 | 0.05395 | 0.00186 | 0.16080 | 0.00538 | 0.02166 | 0.00028 | 0.00718 | 0.00023 | 151  | 5    | 138   | 2.0 | 0.9   |     |
| RYT06-16   | 224  | 717  | 0.31 | 0.04589 | 0.00269 | 0.13816 | 0.00774 | 0.02193 | 0.00042 | 0.00708 | 0.00041 | 131  | 7    | 140   | 3.0 | 1.1   |     |
| RYT06-17   | 805  | 3488 | 0.23 | 0.04898 | 0.00076 | 0.13983 | 0.00235 | 0.02053 | 0.00016 | 0.00657 | 0.00014 | 133  | 2    | 131   | 1.0 | 1.0   |     |
| RYT06-18   | 234  | 922  | 0.25 | 0.04768 | 0.00092 | 0.14426 | 0.00282 | 0.02181 | 0.00017 | 0.00686 | 0.00016 | 137  | 2    | 139   | 1.0 | 1.0   |     |
| RYT06-19   | 366  | 1574 | 0.23 | 0.04899 | 0.00095 | 0.14053 | 0.00272 | 0.02070 | 0.00017 | 0.00684 | 0.00016 | 134  | 2    | 132   | 1.0 | 1.0   |     |
| RYT06-20   | 588  | 1516 | 0.39 | 0.04822 | 0.00093 | 0.13686 | 0.00270 | 0.02047 | 0.00017 | 0.00655 | 0.00014 | 130  | 2    | 131   | 1.0 | 1.0   |     |
| RYT06-21   | 247  | 543  | 0.46 | 0.04830 | 0.00250 | 0.14105 | 0.00681 | 0.02130 | 0.00034 | 0.00605 | 0.00028 | 134  | 6    | 136   | 2.0 | 1.0   |     |
| RYT06-23   | 256  | 1146 | 0.22 | 0.04649 | 0.00112 | 0.14181 | 0.00344 | 0.02194 | 0.00021 | 0.00752 | 0.00023 | 135  | 3    | 140   | 1.0 | 1.0   |     |
| RYT06-24   | 172  | 773  | 0.22 | 0.04837 | 0.00151 | 0.14293 | 0.00461 | 0.02120 | 0.00023 | 0.00724 | 0.00029 | 136  | 4    | 135   | 1.0 | 1.0   |     |
| RYT07-01   | 1054 | 3223 | 0.33 | 0.05861 | 0.00104 | 0.16576 | 0.00301 | 0.02028 | 0.00018 | 0.00770 | 0.00016 | 156  | 3    | 129   | 1.0 | 0.8   |     |
| RYT07-02   | 831  | 3304 | 0.25 | 0.05267 | 0.00093 | 0.15597 | 0.00299 | 0.02118 | 0.00017 | 0.00722 | 0.00016 | 147  | 3    | 135   | 1.0 | 0.9   |     |
| RYT07-04   | 282  | 1165 | 0.24 | 0.05206 | 0.00121 | 0.15660 | 0.00348 | 0.02195 | 0.00029 | 0.00839 | 0.00023 | 148  | 3    | 140   | 2.0 | 0.9   |     |
| RYT07-06   | 1147 | 3816 | 0.30 | 0.05146 | 0.00085 | 0.14997 | 0.00272 | 0.02089 | 0.00019 | 0.00612 | 0.00012 | 142  | 2    | 133   | 1.0 | 0.9   |     |
| RYT07-07   | 445  | 1575 | 0.28 | 0.05043 | 0.00106 | 0.14665 | 0.00297 | 0.02104 | 0.00022 | 0.00704 | 0.00017 | 139  | 3    | 134   | 1.0 | 1.0   |     |
| RYT07-09   | 2163 | 7909 | 0.27 | 0.05032 | 0.00078 | 0.14554 | 0.00235 | 0.02078 | 0.00019 | 0.00698 | 0.00015 | 138  | 2    | 133   | 1.0 | 1.0   |     |
| RYT07-10   | 302  | 1330 | 0.23 | 0.04988 | 0.00120 | 0.14612 | 0.00358 | 0.02134 | 0.00022 | 0.00698 | 0.00020 | 138  | 3    | 136   | 1.0 | 1.0   |     |
| RYT07-11   | 588  | 3152 | 0.19 | 0.05151 | 0.00078 | 0.14834 | 0.00231 | 0.02077 | 0.00018 | 0.00740 | 0.00015 | 140  | 2    | 132   | 1.0 | 0.9   |     |
| RYT07-13   | 2160 | 6451 | 0.33 | 0.05771 | 0.00085 | 0.16329 | 0.00236 | 0.02038 | 0.00016 | 0.00666 | 0.00015 | 154  | 2    | 130   | 1.0 | 0.8   |     |
| RYT07-14   | 3054 | 9386 | 0.33 | 0.05632 | 0.00074 | 0.16403 | 0.00256 | 0.02079 | 0.00017 | 0.00782 | 0.00017 | 154  | 2    | 133   | 1.0 | 0.9   |     |
| RYT07-15   | 705  | 3927 | 0.18 | 0.04986 | 0.00101 | 0.14307 | 0.00280 | 0.02060 | 0.00020 | 0.00726 | 0.00021 | 136  | 2    | 131   | 1.0 | 1.0   |     |
| RYT07-16   | 1145 | 5179 | 0.22 | 0.05721 | 0.00089 | 0.16625 | 0.00263 | 0.02089 | 0.00017 | 0.00835 | 0.00017 | 156  | 2    | 133   | 1.0 | 0.9   |     |
| RYT07-17   | 341  | 1260 | 0.27 | 0.05166 | 0.00116 | 0.15096 | 0.00328 | 0.02109 | 0.00020 | 0.00692 | 0.00018 | 143  | 3    | 135   | 1.0 | 0.9   |     |
| RYT07-18   | 863  | 5588 | 0.15 | 0.05164 | 0.00087 | 0.14699 | 0.00241 | 0.02058 | 0.00017 | 0.00706 | 0.00018 | 139  | 2    | 131   | 1.0 | 0.9   |     |
| RYT07-19   | 308  | 946  | 0.33 | 0.05169 | 0.00211 | 0.14603 | 0.00608 | 0.02056 | 0.00028 | 0.00687 | 0.00030 | 138  | 5    | 131   | 2.0 | 0.9   |     |
| RYT07-22   | 199  | 528  | 0.38 | 0.05564 | 0.00168 | 0.16799 | 0.00486 | 0.02197 | 0.00026 | 0.00734 | 0.00023 | 158  | 4    | 140   | 2.0 | 0.9   |     |
| RYT07-25   | 280  | 536  | 0.52 | 0.06222 | 0.00210 | 0.18629 | 0.00617 | 0.02219 | 0.00044 | 0.00812 | 0.00028 | 173  | 5    | 142   | 3.0 | 0.8   |     |
| RYT07-26   | 177  | 350  | 0.50 | 0.05240 | 0.00159 | 0.15947 | 0.00479 | 0.02209 | 0.00025 | 0.00728 | 0.00020 | 150  | 4    | 141   | 2.0 | 0.9   |     |
| RYT07-27   | 149  | 373  | 0.40 | 0.05006 | 0.00254 | 0.14637 | 0.00725 | 0.02113 | 0.00038 | 0.00671 | 0.00035 | 139  | 6    | 135   | 2.0 | 1.0   |     |
| RYT07-28   | 122  | 380  | 0.32 | 0.05139 | 0.00125 | 0.16006 | 0.00388 | 0.02270 | 0.00027 | 0.00751 | 0.00020 | 151  | 3    | 145   | 2.0 | 1.0   |     |
| RYT07-29   | 182  | 700  | 0.26 | 0.05653 | 0.00149 | 0.17522 | 0.00478 | 0.02238 | 0.00036 | 0.00882 | 0.00031 | 164  | 4    | 143   | 2.0 | 0.9   |     |
| RYT07-30   | 163  | 317  | 0.52 | 0.06022 | 0.00159 | 0.17887 | 0.00449 | 0.02164 | 0.00023 | 0.00757 | 0.00018 | 167  | 4    | 138   | 1.0 | 0.8   |     |
| RYT07-32   | 127  | 298  | 0.43 | 0.05829 | 0.00209 | 0.17220 | 0.00635 | 0.02134 | 0.00034 | 0.00836 | 0.00030 | 161  | 6    | 136   | 2.0 | 0.8   |     |
| D0026-3@1  | 252  | 187  | 1.35 |         |         | 0.14093 | 0.01125 | 0.021   | 0.00055 |         |         | 136  | 182  | 133.9 | 10  | 133.8 | 3.5 |
| D0026-3@2  | 353  | 302  | 1.17 |         |         | 0.14151 | 0.00766 | 0.021   | 0.00046 |         |         | 137  | 125  | 134.4 | 6.8 | 134.2 | 2.9 |
| D0026-3@3  | 187  | 187  | 1.00 |         |         | 0.1431  | 0.00874 | 0.0223  | 0.00044 |         |         | 27.8 | 142  | 135.8 | 7.8 | 142.2 | 2.8 |
| D0026-3@4  | 81   | 73   | 1.11 |         |         | 0.14647 | 0.0189  | 0.0219  | 0.00063 |         |         | 133  | 282  | 138.8 | 17  | 139.3 | 4   |
| D0026-3@5  | 297  | 266  | 1.12 |         |         | 0.14129 | 0.01148 | 0.0208  | 0.00057 |         |         | 158  | 185  | 134.2 | 10  | 132.8 | 3.6 |
| D0026-3@6  | 275  | 661  | 0.42 |         |         | 0.19841 | 0.00664 | 0.0218  | 0.00038 |         |         | 812  | 69   | 183.8 | 5.6 | 138.9 | 2.4 |
| D0026-3@7  | 384  | 890  | 0.43 |         |         | 0.14786 | 0.00545 | 0.0219  | 0.00039 |         |         | 147  | 85.1 | 140   | 4.8 | 139.9 | 2.4 |
| D0026-3@8  | 140  | 162  | 0.86 |         |         | 0.57613 | 0.01586 | 0.0744  | 0.00123 |         |         | 461  | 59.3 | 462   | 10  | 462.3 | 7.4 |
| D0026-3@9  | 145  | 449  | 0.32 |         |         | 0.54667 | 0.01238 | 0.0712  | 0.0011  |         |         | 442  | 46.4 | 442.8 | 8.1 | 443.1 | 6.6 |
| D0026-3@10 | 767  | 613  | 1.25 |         |         | 0.1429  | 0.00443 | 0.0202  | 0.00034 |         |         | 257  | 69.1 | 135.6 | 3.9 | 128.8 | 2.2 |
| D0026-3@11 | 185  | 307  | 0.60 |         |         | 0.14457 | 0.00811 | 0.0219  | 0.00045 |         |         | 97.3 | 132  | 137.1 | 7.2 | 139.6 | 2.9 |
| D0026-3@12 | 524  | 534  | 0.98 |         |         | 0.13919 | 0.00681 | 0.0208  | 0.00044 |         |         | 126  | 114  | 132.3 | 6.1 | 132.7 | 2.8 |
| D0026-3@13 | 289  | 243  | 1.19 |         |         | 0.1295  | 0.01129 | 0.0194  | 0.00059 |         |         | 115  | 200  | 123.7 | 10  | 124.1 | 3.7 |
| D0026-3@14 | 139  | 131  | 1.06 |         |         | 0.31219 | 0.01865 | 0.021   | 0.00057 |         |         | 1765 | 111  | 275.9 | 14  | 133.8 | 3.6 |
| D0026-3@15 | 134  | 305  | 0.43 |         |         | 0.56877 | 0.01323 | 0.0735  | 0.00116 |         |         | 457  | 48.4 | 457.2 | 8.6 | 457.3 | 7   |
| D0026-3@16 | 465  | 349  | 1.33 |         |         | 0.15159 | 0.00708 | 0.0213  | 0.00041 |         |         | 265  | 105  | 143.3 | 6.2 | 136.1 | 2.6 |
| D0026-3@17 | 468  | 343  | 1.36 |         |         | 0.131   | 0.00955 | 0.0194  | 0.00052 |         |         | 146  | 168  | 125   | 8.6 | 123.9 | 3.3 |
| D0026-3@18 | 436  | 444  | 0.98 |         |         | 0.14885 | 0.00936 | 0.0204  | 0.00049 |         |         | 329  | 140  | 140.9 | 8.3 | 130   | 3.1 |
| D0026-3@19 | 482  | 692  | 0.70 |         |         | 0.13154 | 0.00484 | 0.019   | 0.00036 |         |         | 212  | 83.6 | 125.5 | 4.3 | 121   | 2.3 |
| D0026-3@20 | 475  | 828  | 0.57 |         |         | 0.1413  | 0.00854 | 0.0208  | 0.00037 |         |         | 162  | 136  | 134.2 | 7.6 | 132.6 | 2.3 |
| D0026-3@21 | 589  | 635  | 0.93 |         |         | 0.1454  | 0.00748 | 0.0214  | 0.00036 |         |         | 160  | 115  | 137.8 | 6.6 | 136.5 | 2.3 |
| D0026-3@22 | 375  | 668  | 0.56 |         |         | 0.14919 | 0.00776 | 0.0218  | 0.00039 |         |         | 183  | 116  | 141.2 | 6.9 | 138.7 | 2.4 |
| D0026-3@23 | 749  | 1091 | 0.69 |         |         | 0.15502 | 0.01081 | 0.0227  | 0.00051 |         |         | 166  | 157  | 146.3 | 9.5 | 144.9 | 3.2 |
| D0026-3@24 | 201  | 319  | 0.63 |         |         | 0.15331 | 0.0142  | 0.0227  | 0.00045 |         |         | 145  | 204  | 144.8 | 13  | 144.9 | 2.9 |
| D0026-3@25 | 779  | 1603 | 0.49 |         |         | 0.15241 | 0.00568 | 0.022   | 0.0004  |         |         | 212  | 82.5 | 144   | 5   | 139.9 | 2.5 |
| D0026-3@26 | 325  | 267  | 1.22 |         |         | 0.15222 | 0.01751 | 0.0223  | 0.00049 |         |         | 176  | 249  | 143.9 | 15  | 141.9 | 3.1 |
| D0026-3@27 | 934  | 1432 | 0.65 |         |         | 0.15742 | 0.01114 | 0.0221  | 0.00048 |         |         | 272  | 156  | 148.4 | 9.8 | 141   | 3.1 |
| D0026-3@28 | 370  | 229  | 1.62 |         |         | 0.15163 | 0.02711 | 0.0226  | 0.00062 |         |         | 135  | 376  | 143.3 | 24  | 143.8 | 3.9 |
| D0026-3@29 | 303  | 568  | 0.53 |         |         | 0.15045 | 0.0199  | 0.0214  | 0.0008  |         |         | 242  | 285  | 142.3 | 18  | 136.5 | 5.1 |
| D0026-3@30 | 521  | 594  | 0.88 |         |         | 0.14567 | 0.01537 | 0.0211  | 0.00064 |         |         | 202  | 233  | 138.1 | 14  | 134.6 | 4   |
| D0026-3@31 | 128  | 123  | 1.04 |         |         | 0.15008 | 0.05802 | 0.0225  | 0.00091 |         |         | 112  | 726  | 142   | 51  | 143.7 | 5.7 |
| D0026-3@32 | 161  | 159  | 1.01 |         |         | 0.15455 | 0.03504 | 0.0227  | 0.0007  |         |         | 161  | 461  | 145.9 | 31  | 144.9 | 4.4 |
| D0026-3@33 | 282  | 208  | 1.36 |         |         | 0.15066 | 0.03392 | 0.0221  | 0.00067 |         |         | 169  | 457  | 142.5 | 30  | 140.7 | 4.2 |
| D0839-13@1 | 912  | 1525 | 0.60 |         |         | 0.14125 | 0.004   | 0.021   | 0.00036 |         |         | 134  | 63.6 | 134.2 | 3.6 | 134.2 | 2.3 |
| D0839-13@2 | 641  | 724  | 0.89 |         |         | 0.14672 | 0.00386 | 0.0218  | 0.00035 |         |         | 140  | 57.8 | 139   | 3.4 | 138.9 | 2.2 |
| D0839-13@3 | 1868 | 1874 | 1.00 |         |         | 0.15203 | 0.0033  | 0.0225  | 0.00034 |         |         | 145  | 45.9 | 143.7 | 2.9 |       |     |

|              |      |      |      |          |         |        |         |      |      |       |     |       |      |
|--------------|------|------|------|----------|---------|--------|---------|------|------|-------|-----|-------|------|
| D0839-13@12  | 1767 | 1948 | 0.91 | 0.15539  | 0.00336 | 0.023  | 0.00035 | 147  | 46.1 | 146.7 | 3   | 146.6 | 2.2  |
| D0839-13@13  | 1344 | 1424 | 0.94 | 0.15152  | 0.00362 | 0.0225 | 0.00034 | 142  | 52.1 | 143.3 | 3.2 | 143.3 | 2.2  |
| D0839-13@14  | 3065 | 2567 | 1.19 | 0.16799  | 0.0035  | 0.0228 | 0.00034 | 349  | 42.5 | 157.7 | 3   | 145.2 | 2.2  |
| D0839-13@15  | 1182 | 1190 | 0.99 | 0.14658  | 0.00355 | 0.0224 | 0.00035 | 77.4 | 54.1 | 138.9 | 3.1 | 142.5 | 2.2  |
| D0839-13@16  | 1074 | 1061 | 1.01 | 0.13882  | 0.00359 | 0.0206 | 0.00033 | 139  | 57.2 | 132   | 3.2 | 131.6 | 2.1  |
| D0839-13@17  | 2414 | 2351 | 1.03 | 0.15144  | 0.00339 | 0.0225 | 0.00034 | 142  | 48.1 | 143.2 | 3   | 143.3 | 2.2  |
| D0839-13@18  | 1790 | 1945 | 0.92 | 0.14938  | 0.00325 | 0.0222 | 0.00034 | 138  | 46.2 | 141.4 | 2.9 | 141.6 | 2.2  |
| D0839-13@19  | 942  | 1271 | 0.74 | 0.15269  | 0.00372 | 0.0226 | 0.00036 | 144  | 53   | 144.3 | 3.3 | 144.3 | 2.2  |
|              |      |      |      |          |         |        |         |      |      |       |     |       |      |
| D0001-1@1    | 812  | 701  | 1.16 | 0.15262  | 0.00705 | 0.0228 | 0.00037 | 129  | 104  | 144.2 | 6.2 | 145.2 | 2.3  |
| D0001-1@2    | 508  | 303  | 1.68 | 0.14743  | 0.0155  | 0.022  | 0.00046 | 134  | 231  | 139.6 | 14  | 140   | 2.9  |
| D0001-1@3    | 297  | 276  | 1.08 | 0.14408  | 0.01511 | 0.0221 | 0.00042 | 64.3 | 234  | 136.7 | 13  | 140.9 | 2.7  |
| D0001-1@4    | 223  | 183  | 1.22 | 0.139641 | 0.04093 | 0.1479 | 0.00234 | 883  | 57.3 | 887.4 | 17  | 889.4 | 3.1  |
| D0001-1@5    | 315  | 272  | 1.16 | 0.14706  | 0.01631 | 0.0218 | 0.00044 | 141  | 242  | 139.3 | 14  | 139.2 | 2.8  |
| D0001-1@6    | 779  | 555  | 1.40 | 0.15138  | 0.00825 | 0.0222 | 0.00037 | 166  | 122  | 143.1 | 7.3 | 141.8 | 2.3  |
| D0001-1@7    | 116  | 138  | 0.84 | 0.47755  | 0.0372  | 0.0709 | 0.00132 | 142  | 174  | 396.4 | 26  | 441.3 | 8    |
| D0001-1@8    | 131  | 144  | 0.91 | 0.33147  | 0.03585 | 0.0462 | 0.00102 | 285  | 231  | 290.7 | 27  | 291.4 | 6.3  |
| D0001-1@9    | 137  | 276  | 0.50 | 0.52595  | 0.02293 | 0.0694 | 0.00117 | 413  | 94   | 429.1 | 15  | 432.3 | 7    |
| D0001-1@10   | 32   | 384  | 0.08 | 0.53938  | 0.02283 | 0.0707 | 0.0012  | 425  | 91.2 | 438   | 15  | 440.5 | 7.2  |
| D0001-1@11   | 141  | 250  | 0.56 | 0.54306  | 0.02184 | 0.071  | 0.00116 | 430  | 86.2 | 440.4 | 14  | 442.4 | 7    |
| D0001-1@12   | 71   | 68   | 1.04 | 4.48215  | 0.18777 | 0.3196 | 0.00616 | 1656 | 76.9 | 1728  | 35  | 787.9 | 30.1 |
| D0001-1@13   | 291  | 217  | 1.34 | 0.19546  | 0.02202 | 0.0199 | 0.0005  | 969  | 217  | 181.3 | 19  | 126.7 | 3.2  |
| D0001-1@14   | 252  | 856  | 0.29 | 0.35634  | 0.00922 | 0.0491 | 0.00073 | 314  | 55.1 | 309.5 | 6.9 | 308.9 | 4.5  |
| D0001-1@15   | 243  | 700  | 0.35 | 0.54162  | 0.01371 | 0.0708 | 0.00108 | 431  | 52.1 | 439.5 | 9   | 441.1 | 6.5  |
| D0001-1@17   | 48   | 52   | 0.92 | 1.12494  | 0.07776 | 0.126  | 0.00238 | 767  | 140  | 765.3 | 37  | 764.8 | 13.6 |
| D0001-1@18   | 70   | 352  | 0.20 | 0.50772  | 0.02114 | 0.0665 | 0.00111 | 426  | 90.5 | 416.9 | 14  | 415.2 | 6.7  |
| D0001-1@19   | 746  | 449  | 1.66 | 0.13113  | 0.00995 | 0.02   | 0.00038 | 82.8 | 172  | 125.1 | 8.9 | 127.3 | 2.4  |
| D0001-1@20   | 394  | 434  | 0.91 | 0.51792  | 0.01506 | 0.0679 | 0.00104 | 427  | 61.2 | 423.8 | 10  | 423.2 | 6.3  |
| D0001-1@21   | 191  | 328  | 0.58 | 0.51278  | 0.02217 | 0.0686 | 0.0012  | 379  | 93.9 | 420.3 | 15  | 427.9 | 7.2  |
| D0001-1@22   | 371  | 240  | 1.55 | 0.1371   | 0.02181 | 0.0205 | 0.00056 | 123  | 339  | 130.5 | 20  | 130.9 | 3.5  |
| D0001-1@23   | 79   | 190  | 0.42 | 0.28022  | 0.02297 | 0.0394 | 0.00077 | 270  | 178  | 250.8 | 18  | 248.8 | 4.8  |
| D0001-1@24   | 221  | 153  | 1.44 | 0.1387   | 0.02264 | 0.0207 | 0.00047 | 131  | 345  | 131.9 | 20  | 132   | 3    |
| D0001-1@25   | 158  | 182  | 0.87 | 0.51059  | 0.02655 | 0.0699 | 0.00118 | 328  | 113  | 418.8 | 18  | 435.6 | 7.1  |
| D0001-1@26   | 421  | 612  | 0.69 | 0.14459  | 0.01064 | 0.0216 | 0.00046 | 125  | 166  | 137.1 | 9.4 | 137.9 | 2.9  |
| D0001-1@27   | 612  | 479  | 1.28 | 0.15332  | 0.01039 | 0.0228 | 0.00042 | 135  | 152  | 144.8 | 9.2 | 145.5 | 2.7  |
| D0001-1@28   | 668  | 354  | 1.89 | 1.38286  | 0.03172 | 0.1492 | 0.00221 | 845  | 43.5 | 881.7 | 14  | 896.7 | 2.4  |
| D0001-1@29   | 400  | 291  | 1.37 | 0.14109  | 0.01391 | 0.0223 | 0.00042 | 0.1  | 214  | 134   | 12  | 142.3 | 2.7  |
| D0001-1@30   | 137  | 85   | 1.61 | 1.3574   | 0.05865 | 0.1447 | 0.00243 | 870  | 86.2 | 870.7 | 25  | 871.2 | 3.7  |
| D0001-1@31   | 306  | 274  | 1.12 | 0.16378  | 0.01908 | 0.0243 | 0.00055 | 142  | 254  | 154   | 17  | 154.8 | 3.5  |
| D0001-1@32   | 129  | 507  | 0.25 | 0.50015  | 0.01518 | 0.0657 | 0.00105 | 421  | 62.9 | 411.8 | 10  | 410.1 | 6.3  |
| D0001-1@33   | 84   | 65   | 1.29 | 3.60841  | 0.1267  | 0.2724 | 0.00496 | 1549 | 63.1 | 1551  | 28  | 1553  | 25.1 |
| D0001-1@34   | 2132 | 1252 | 1.70 | 0.16426  | 0.0085  | 0.0241 | 0.0005  | 172  | 117  | 154.4 | 74  | 153.3 | 3.1  |
| D0001-1@35   | 396  | 485  | 0.82 | 0.57783  | 0.01737 | 0.0746 | 0.00116 | 459  | 63.1 | 463.1 | 11  | 464   | 7    |
| D0001-1@36   | 1008 | 641  | 1.57 | 0.14683  | 0.00853 | 0.0227 | 0.00038 | 45.7 | 133  | 139.1 | 7.6 | 144.6 | 2.4  |
| D0001-1@37   | 202  | 707  | 0.29 | 0.84542  | 0.02191 | 0.101  | 0.00161 | 629  | 51.2 | 622.1 | 12  | 620.4 | 9.4  |
| D0001-1@38   | 409  | 263  | 1.56 | 1.24578  | 0.05859 | 0.1354 | 0.0027  | 831  | 95.4 | 821.5 | 27  | 818.4 | 5.3  |
| D0001-1@39   | 461  | 712  | 0.65 | 0.14889  | 0.00873 | 0.0217 | 0.00038 | 182  | 131  | 140.9 | 7.7 | 138.5 | 2.4  |
| D0001-1@40   | 440  | 393  | 1.12 | 0.15578  | 0.01347 | 0.0233 | 0.00043 | 126  | 192  | 147   | 12  | 148.3 | 2.7  |
| D0001-1@41   | 279  | 312  | 0.89 | 0.57467  | 0.02513 | 0.0742 | 0.00127 | 459  | 94.1 | 461   | 16  | 461.4 | 7.6  |
|              |      |      |      |          |         |        |         |      |      |       |     |       |      |
| D0004-1@1    | 168  | 150  | 1.12 | 0.1459   | 0.03254 | 0.0219 | 0.0006  | 120  | 457  | 138.3 | 29  | 139.4 | 3.8  |
| D0004-1@2    | 849  | 539  | 1.58 | 0.14659  | 0.00866 | 0.0215 | 0.00036 | 167  | 132  | 138.9 | 7.7 | 137.3 | 2.3  |
| D0004-1@3    | 5888 | 3449 | 1.71 | 0.15136  | 0.00476 | 0.0221 | 0.00033 | 183  | 70.7 | 143.1 | 4.2 | 140.8 | 2.1  |
| D0004-1@4    | 1639 | 1256 | 1.30 | 0.14225  | 0.00493 | 0.0213 | 0.00033 | 125  | 77.9 | 135   | 4.4 | 135.7 | 2.1  |
| D0004-1@5    | 1636 | 638  | 2.56 | 0.14732  | 0.0106  | 0.0217 | 0.00042 | 161  | 162  | 139.5 | 9.4 | 138.3 | 2.6  |
| D0004-1@6    | 259  | 294  | 0.88 | 0.14615  | 0.01916 | 0.0215 | 0.0005  | 168  | 282  | 138.5 | 17  | 136.8 | 3.1  |
| D0004-1@7    | 706  | 548  | 1.29 | 0.14049  | 0.00966 | 0.0212 | 0.00038 | 109  | 155  | 133.5 | 8.6 | 134.9 | 2.4  |
| D0004-1@8    | 636  | 324  | 1.96 | 0.13836  | 0.02059 | 0.0207 | 0.00055 | 120  | 320  | 131.6 | 18  | 132.3 | 3.5  |
| D0004-1@9    | 754  | 934  | 0.81 | 0.14317  | 0.00634 | 0.0217 | 0.00035 | 89.2 | 103  | 135.9 | 5.6 | 138.5 | 2.2  |
| D0004-1@10   | 726  | 514  | 1.41 | 0.13747  | 0.01085 | 0.0211 | 0.0004  | 67.1 | 180  | 130.8 | 9.7 | 134.3 | 2.5  |
| D0004-1@11   | 2606 | 1798 | 1.45 | 0.14207  | 0.00428 | 0.0212 | 0.00032 | 129  | 68.1 | 134.9 | 3.8 | 135.3 | 2    |
| D0004-1@12   | 540  | 587  | 0.92 | 0.13777  | 0.00801 | 0.0206 | 0.00034 | 127  | 132  | 131.1 | 7.2 | 131.3 | 2.2  |
| D0004-1@13   | 986  | 620  | 1.59 | 0.14213  | 0.00781 | 0.021  | 0.00037 | 151  | 124  | 134.9 | 6.9 | 134.1 | 2.3  |
| D0004-1@14   | 691  | 636  | 1.09 | 0.14238  | 0.00739 | 0.0216 | 0.00035 | 90.8 | 119  | 135.2 | 6.6 | 137.7 | 2.2  |
| D0004-1@15   | 1250 | 894  | 1.40 | 0.1392   | 0.00541 | 0.0205 | 0.00032 | 158  | 86.8 | 132.3 | 4.8 | 130.9 | 2.1  |
| D0004-1@16   | 1303 | 994  | 1.31 | 0.13687  | 0.00615 | 0.0207 | 0.00035 | 98.1 | 103  | 130.3 | 5.5 | 132   | 2.2  |
| D0004-1@17   | 2744 | 1912 | 1.44 | 0.14586  | 0.00399 | 0.0217 | 0.00034 | 135  | 59.8 | 138.3 | 3.5 | 138.5 | 2.1  |
| D0004-1@18   | 187  | 105  | 1.78 | 0.13854  | 0.0413  | 0.0209 | 0.00068 | 109  | 587  | 131.7 | 37  | 133   | 4.3  |
| D0004-1@19   | 1785 | 1579 | 1.13 | 0.14022  | 0.00584 | 0.021  | 0.00035 | 127  | 95   | 133.2 | 5.2 | 133.7 | 2.2  |
| D0004-1@20   | 860  | 617  | 1.39 | 0.14099  | 0.00818 | 0.021  | 0.00036 | 137  | 131  | 133.9 | 7.3 | 133.8 | 2.3  |
| D0004-1@21   | 1944 | 1940 | 1.00 | 0.14432  | 0.00425 | 0.0212 | 0.00033 | 162  | 64.2 | 136.9 | 3.8 | 135.5 | 2.1  |
| D0004-1@22   | 3094 | 2745 | 1.13 | 0.14357  | 0.00386 | 0.0213 | 0.00033 | 140  | 58.1 | 136.2 | 3.4 | 136   | 2.1  |
| D0004-1@23   | 1537 | 1267 | 1.21 | 0.14113  | 0.00528 | 0.0215 | 0.00035 | 78.4 | 85   | 134   | 4.7 | 137.2 | 2.2  |
| D0004-1@24   | 2341 | 2390 | 0.98 | 0.14128  | 0.00433 | 0.0216 | 0.00035 | 75.8 | 68.5 | 134.2 | 3.9 | 137.5 | 2.2  |
| D0004-1@25   | 283  | 156  | 1.81 | 0.13792  | 0.02966 | 0.0206 | 0.00058 | 124  | 443  | 131.2 | 27  | 131.6 | 3.7  |
|              |      |      |      |          |         |        |         |      |      |       |     |       |      |
| ZK26-101-2@1 | 282  | 638  | 0.44 | 0.1414   | 0.02722 | 0.021  | 0.03505 | 136  | 50.9 | 134.3 | 3.4 | 134.2 | 2.1  |
| ZK26-101-2@2 | 161  | 495  | 0.33 | 0.14239  | 0.02683 | 0.0207 | 0.01603 | 193  | 49.9 | 135.2 | 3.4 | 131.9 | 2    |
| ZK26-101-2@3 | 261  | 367  | 0.71 | 0.13609  | 0.02883 | 0.021  | 0.01566 | 54.7 | 57.2 | 129.6 | 3.5 | 133.7 | 2    |
| ZK26-101-2@4 | 183  | 613  | 0.30 | 0.14149  | 0.02414 | 0.0209 | 0.01539 | 158  | 43   | 134.4 | 3   | 133.1 | 2    |
| ZK26-101-2@5 | 222  | 1056 | 0.21 | 0.14335  | 0.02188 | 0.0212 | 0.01536 | 154  | 33.8 | 136   | 2.8 | 135   | 2.2  |
| ZK26-101-2@6 | 110  | 243  | 0.45 | 0.14179  | 0.03251 | 0.0208 | 0.01632 | 165  | 65.6 | 134.6 | 4.1 | 132.9 | 2    |
| ZK26-101-2@7 | 154  | 451  | 0.34 | 0.14738  | 0.02617 | 0.0224 | 0.01536 | 86.7 | 73.2 | 139.6 | 4.6 | 142.7 | 2.1  |
| ZK26-101-2@8 | 327  | 1295 | 0.25 | 0.13705  | 0.02081 | 0.0206 | 0.01511 | 108  | 33   | 130.4 | 2.5 | 131.7 | 2    |

|                |     |      |      |         |          |        |         |       |      |       |     |       |     |
|----------------|-----|------|------|---------|----------|--------|---------|-------|------|-------|-----|-------|-----|
| ZK26-101-2@9   | 426 | 1568 | 0.27 | 0.23919 | 0.02094  | 0.034  | 0.01528 | 245   | 22.5 | 217.8 | 3.5 | 215.3 | 3.2 |
| ZK26-101-2@10  | 314 | 981  | 0.32 | 0.14045 | 0.0242   | 0.0212 | 0.01501 | 102   | 39.6 | 133.4 | 3   | 135.2 | 2.3 |
| ZK26-101-2@11  | 90  | 133  | 0.68 | 0.14305 | 0.08059  | 0.0207 | 0.01727 | 205   | 174  | 135.8 | 10  | 131.8 | 2.1 |
| ZK26-101-2@12  | 269 | 841  | 0.32 | 0.14271 | 0.02542  | 0.0208 | 0.01605 | 182   | 47   | 135.5 | 3.2 | 132.8 | 2   |
| ZK26-101-2@13  | 314 | 1210 | 0.26 | 0.14978 | 0.02145  | 0.0219 | 0.01509 | 181   | 33.2 | 141.7 | 2.8 | 139.4 | 2.2 |
| ZK26-101-2@14  | 69  | 140  | 0.49 | 0.13639 | 0.04676  | 0.0213 | 0.01591 | 0     | 117  | 129.8 | 5.7 | 136.2 | 2.2 |
| #####          |     |      |      |         |          |        |         |       |      |       |     |       |     |
| ZK26-101-70@1  | 255 | 378  | 0.67 | 0.01598 | 124.22.0 |        |         |       |      |       |     |       |     |
| ZK26-101-70@2  | 137 | 275  | 0.50 | 0.14647 | 0.04151  | 0.0206 | 0.01742 | 264   | 84.3 | 138.8 | 5.4 | 131.6 | 2.3 |
| ZK26-101-70@3  | 132 | 285  | 0.46 | 0.13936 | 0.04485  | 0.0206 | 0.0155  | 154   | 95.7 | 132.5 | 5.6 | 131.3 | 2   |
| ZK26-101-70@4  | 469 | 1714 | 0.27 | 0.14044 | 0.01935  | 0.0207 | 0.01508 | 156   | 28.2 | 133.4 | 2.4 | 132.2 | 2   |
| ZK26-101-70@5  | 290 | 825  | 0.35 | 0.13861 | 0.02267  | 0.0205 | 0.0151  | 150   | 39.2 | 131.8 | 2.8 | 130.8 | 2   |
| ZK26-101-70@8  | 60  | 135  | 0.44 | 0.14358 | 0.04362  | 0.0205 | 0.01588 | 228   | 91.2 | 136.2 | 5.6 | 131   | 2.1 |
| ZK26-101-70@9  | 141 | 270  | 0.52 | 0.13852 | 0.03672  | 0.021  | 0.01545 | 91.4  | 77.1 | 131.7 | 4.5 | 134   | 2   |
| ZK26-101-70@10 | 245 | 853  | 0.29 | 0.14498 | 0.02191  | 0.0218 | 0.01517 | 115   | 36.9 | 137.5 | 2.8 | 138.8 | 2.1 |
| ZK26-101-70@11 | 85  | 165  | 0.52 | 0.14547 | 0.0538   | 0.0212 | 0.01541 | 179   | 116  | 137.9 | 7   | 135.5 | 2.1 |
| ZK26-101-70@12 | 255 | 900  | 0.28 | 0.14054 | 0.02251  | 0.0211 | 0.01549 | 118   | 38   | 133.5 | 2.8 | 134.4 | 2.1 |
| ZK26-101-70@13 | 214 | 393  | 0.54 | 0.14245 | 0.0283   | 0.0214 | 0.01573 | 117   | 54.6 | 135.2 | 3.6 | 136.3 | 2.1 |
| ZK26-101-70@14 | 162 | 452  | 0.36 | 0.1348  | 0.03731  | 0.0205 | 0.0153  | 84.2  | 78.8 | 128.4 | 4.5 | 130.8 | 2   |
| ZK26-101-70@15 | 199 | 518  | 0.38 | 0.11482 | 0.18211  | 0.0168 | 0.01532 | 172   | 376  | 110.4 | 19  | 107.5 | 1.6 |
| ZK26-101-70@16 | 149 | 296  | 0.50 | 0.14192 | 0.03585  | 0.0212 | 0.01722 | 121   | 72.5 | 134.7 | 4.5 | 135.5 | 2.3 |
| ZK26-101-70@17 | 190 | 587  | 0.32 | 0.14388 | 0.02895  | 0.0215 | 0.01521 | 130   | 56.9 | 136.5 | 3.7 | 136.9 | 2.1 |
| ZK26-101-70@18 | 277 | 790  | 0.35 | 0.14016 | 0.02367  | 0.0211 | 0.01516 | 111   | 42.4 | 133.2 | 3   | 134.4 | 2   |
| ZK26-101-70@19 | 100 | 254  | 0.39 | 0.14698 | 0.04791  | 0.0207 | 0.01501 | 259   | 101  | 139.2 | 6.3 | 132.3 | 2   |
| ZK26-101-70@20 | 190 | 317  | 0.60 | 0.13569 | 0.0326   | 0.0218 | 0.0152  | -42.7 | 68.6 | 129.2 | 4   | 138.7 | 2.1 |
| ZK26-101-70@21 | 164 | 381  | 0.43 | 0.13706 | 0.03013  | 0.0206 | 0.01605 | 116   | 59.1 | 130.4 | 3.7 | 131.2 | 2.1 |
| ZK26-101-70@22 | 344 | 1049 | 0.33 | 0.1444  | 0.02125  | 0.0215 | 0.01502 | 137   | 35   | 137   | 2.7 | 136.9 | 2   |
| ZK26-101-70@23 | 133 | 261  | 0.51 | 0.14109 | 0.03375  | 0.0209 | 0.01513 | 141   | 69.3 | 134   | 4.2 | 133.6 | 2   |
| ZK26-101-70@24 | 151 | 309  | 0.49 | 0.15803 | 0.10071  | 0.0209 | 0.01585 | 402   | 209  | 149   | 14  | 133.6 | 2.1 |
| ZK26-101-70@25 | 361 | 792  | 0.46 | 0.1349  | 0.02496  | 0.0202 | 0.01552 | 123   | 45.4 | 128.5 | 3   | 128.8 | 2   |
| ZK26-101-70@26 | 227 | 499  | 0.45 | 0.13765 | 0.02948  | 0.021  | 0.01501 | 74.5  | 59.2 | 130.9 | 3.6 | 134.1 | 2   |
| ZK26-101-70@27 | 131 | 264  | 0.50 | 0.14745 | 0.05931  | 0.0212 | 0.01521 | 219   | 128  | 139.7 | 7.8 | 135   | 2   |
| ZK26-101-70@28 | 252 | 518  | 0.49 | 0.14418 | 0.02679  | 0.0215 | 0.01563 | 136   | 50.4 | 136.8 | 3.4 | 136.8 | 2.1 |
| ZK26-101-70@29 | 276 | 541  | 0.51 | 0.14717 | 0.0296   | 0.022  | 0.01543 | 121   | 58.5 | 139.4 | 3.9 | 140.5 | 2.1 |

M18b, southmost Jiangxi and northmost Guangdong (Wu et al., 2011a, b)

|              |     |     |      |        |   |         |         |  |  |  |  |       |     |
|--------------|-----|-----|------|--------|---|---------|---------|--|--|--|--|-------|-----|
| AY015-1.1    | 75  | 88  | 0.85 | 0.063  | 3 | 0.14400 | 0.02178 |  |  |  |  | 138.9 | 2.1 |
| AY015-2.1    | 59  | 95  | 0.62 | 0.064  | 8 | 0.18600 | 0.02263 |  |  |  |  | 144.2 | 2.3 |
| AY015-3.1    | 170 | 235 | 0.72 | 0.054  | 9 | 0.14030 | 0.02234 |  |  |  |  | 142.4 | 1.7 |
| AY015-4.1    | 216 | 258 | 0.84 | 0.053  | 3 | 0.14000 | 0.02221 |  |  |  |  | 141.6 | 2.3 |
| AY015-5.1    | 125 | 216 | 0.58 | 0.057  | 2 | 0.17910 | 0.02220 |  |  |  |  | 141.5 | 1.7 |
| AY015-6.1    | 123 | 184 | 0.67 | 0.055  | 2 | 0.14860 | 0.02210 |  |  |  |  | 140.9 | 1.7 |
| AY015-7.1    | 139 | 289 | 0.48 | 0.054  | 4 | 0.27090 | 0.03649 |  |  |  |  | 231   | 2.4 |
| AY015-8.1    | 136 | 253 | 0.54 | 0.053  | 3 | 0.15460 | 0.02240 |  |  |  |  | 142.8 | 1.5 |
| AY015-9.1    | 246 | 347 | 0.71 | 0.055  | 6 | 0.18340 | 0.02222 |  |  |  |  | 141.7 | 1.5 |
| AY015-10.1   | 129 | 205 | 0.63 | 0.056  | 0 | 0.14960 | 0.02208 |  |  |  |  | 140.8 | 1.6 |
| AY015-11.1   | 227 | 353 | 0.64 | 0.053  | 2 | 0.14930 | 0.02205 |  |  |  |  | 140.6 | 1.5 |
| AY015-12.1   | 150 | 253 | 0.59 | 0.055  | 0 | 0.16510 | 0.02287 |  |  |  |  | 145.8 | 2.2 |
| AY015-13.1   | 196 | 288 | 0.68 | 0.052  | 2 | 0.15600 | 0.02245 |  |  |  |  | 143.1 | 1.6 |
| AY015-14.1   | 120 | 189 | 0.63 | 0.0216 |   | 0.13100 | 0.02160 |  |  |  |  | 137.8 | 1.7 |
|              |     |     |      |        |   |         |         |  |  |  |  |       |     |
| DCS-110-1.1  | 144 | 194 | 0.74 |        |   | 0.13500 | 0.02088 |  |  |  |  | 133.2 | 3.0 |
| DCS-110-2.1  | 452 | 695 | 0.65 |        |   | 0.14510 | 0.02136 |  |  |  |  | 136.3 | 2.5 |
| DCS-110-3.1  | 79  | 172 | 0.46 |        |   | 0.13930 | 0.02041 |  |  |  |  | 130.2 | 2.8 |
| DCS-110-4.1  | 177 | 200 | 0.89 |        |   | 0.15000 | 0.02149 |  |  |  |  | 137.1 | 3.2 |
| DCS-110-5.1  | 338 | 485 | 0.70 |        |   | 0.14940 | 0.02127 |  |  |  |  | 135.7 | 3.0 |
| DCS-110-6.1  | 349 | 500 | 0.70 |        |   | 0.14560 | 0.02214 |  |  |  |  | 141.2 | 4.0 |
| DCS-110-7.1  | 292 | 506 | 0.58 |        |   | 0.13660 | 0.02143 |  |  |  |  | 136.7 | 2.5 |
| DCS-110-8.1  | 271 | 377 | 0.72 |        |   | 0.14690 | 0.02126 |  |  |  |  | 135.6 | 2.7 |
| DCS-110-9.1  | 279 | 387 | 0.72 |        |   | 0.14610 | 0.02187 |  |  |  |  | 139.5 | 2.8 |
| DCS-110-10.1 | 480 | 644 | 0.75 |        |   | 0.14840 | 0.02117 |  |  |  |  | 135.1 | 2.5 |
| DCS-110-11.1 | 575 | 579 | 0.99 |        |   | 0.15050 | 0.02132 |  |  |  |  | 136   | 2.7 |
| DCS-110-12.1 | 484 | 572 | 0.85 |        |   | 0.13670 | 0.02094 |  |  |  |  | 133.6 | 2.6 |
| DCS-110-13.1 | 448 | 569 | 0.79 |        |   | 0.1436  | 0.0209  |  |  |  |  | 133.3 | 2.6 |
|              |     |     |      |        |   |         |         |  |  |  |  |       |     |
| CF102-1.1    | 71  | 126 | 0.56 |        |   | 0.12040 | 0.02070 |  |  |  |  | 132.1 | 2.0 |
| CF102-2.1    | 300 | 567 | 0.53 |        |   | 0.15790 | 0.02058 |  |  |  |  | 131.3 | 1.2 |
| CF102-3.1    | 358 | 656 | 0.55 |        |   | 0.14430 | 0.02032 |  |  |  |  | 129.7 | 1.2 |
| CF102-4.1    | 411 | 659 | 0.62 |        |   | 0.15230 | 0.02030 |  |  |  |  | 129.5 | 1.2 |
| CF102-5.1    | 199 | 404 | 0.49 |        |   | 0.17100 | 0.02090 |  |  |  |  | 133.4 | 1.6 |
| CF102-6.1    | 317 | 513 | 0.62 |        |   | 0.15180 | 0.02080 |  |  |  |  | 132.7 | 1.3 |
| CF102-7.1    | 973 | 634 | 1.53 |        |   | 0.16690 | 0.02079 |  |  |  |  | 132.7 | 1.3 |
| CF102-8.1    | 476 | 786 | 0.61 |        |   | 0.14220 | 0.02024 |  |  |  |  | 129.2 | 1.2 |
| CF102-9.1    | 498 | 717 | 0.69 |        |   | 0.13430 | 0.02033 |  |  |  |  | 129.8 | 1.2 |
| CF102-10.1   | 333 | 570 | 0.58 |        |   | 0.17560 | 0.02085 |  |  |  |  | 133   | 1.7 |
| CF102-11.1   | 299 | 460 | 0.65 |        |   | 0.15570 | 0.02063 |  |  |  |  | 131.7 | 1.3 |
| CF102-12.1   | 341 | 144 | 2.37 |        |   | 0.14100 | 0.02032 |  |  |  |  | 129.7 | 1.8 |
| CF102-13.1   | 248 | 446 | 0.56 |        |   | 0.11500 | 0.02024 |  |  |  |  | 129.2 | 1.5 |
| CF102-14.1   | 301 | 220 | 1.37 |        |   | 0.15060 | 0.02022 |  |  |  |  | 129   | 1.5 |
|              |     |     |      |        |   |         |         |  |  |  |  |       |     |
| BS201-1.1    | 143 | 386 | 0.37 |        |   | 0.30610 | 0.04184 |  |  |  |  | 264.2 | 3.7 |
| BS201-2.1    | 83  | 125 | 0.66 |        |   | 0.20900 | 0.02305 |  |  |  |  | 146.9 | 2.5 |
| BS201-3.1    | 311 | 718 | 0.43 |        |   | 0.15830 | 0.02242 |  |  |  |  | 142.9 | 2.0 |

M18c, southmost Jiangxi and northmost Guangdong (Wu et al., 2012)

### 3.Fujian province

L8, Golden Lake of Taining county in Taining Basin

|            |     |     |      |         |         |         |         |         |         |         |         |      |     |     |     |    |    |     |     |    |     |  |
|------------|-----|-----|------|---------|---------|---------|---------|---------|---------|---------|---------|------|-----|-----|-----|----|----|-----|-----|----|-----|--|
| H1         |     |     |      |         |         |         |         |         |         |         |         |      |     |     |     |    |    |     |     |    |     |  |
| 1110-01-1  | 103 | 70  | 1.46 | 0.05348 | 0.00495 | 0.11291 | 0.01041 | 0.01532 | 0.00028 | 0.00341 | 0.00022 | 0.08 | 349 | 212 | 109 | 9  | 98 | 2.0 | 69  | 4  | 0.9 |  |
| 1110-01-2  | 85  | 44  | 1.91 | 0.05080 | 0.00883 | 0.10828 | 0.01870 | 0.01546 | 0.00038 | 0.00445 | 0.00040 | 0.03 | 232 | 339 | 104 | 17 | 99 | 2.0 | 90  | 8  | 1.0 |  |
| 1110-01-3  | 110 | 61  | 1.79 | 0.04726 | 0.00609 | 0.09717 | 0.01246 | 0.01492 | 0.00030 | 0.00295 | 0.00022 | 0.05 | 62  | 257 | 94  | 12 | 95 | 2.0 | 60  | 4  | 1.0 |  |
| 1110-01-4  | 234 | 93  | 2.52 | 0.05020 | 0.00467 | 0.10752 | 0.00993 | 0.01553 | 0.00030 | 0.00499 | 0.00043 | 0.07 | 204 | 212 | 104 | 9  | 99 | 2.0 | 101 | 9  | 1.0 |  |
| 1110-01-5  | 85  | 55  | 1.53 | 0.04782 | 0.00670 | 0.09712 | 0.01356 | 0.01473 | 0.00030 | 0.00409 | 0.00037 | 0.05 | 90  | 276 | 94  | 13 | 94 | 2.0 | 82  | 7  | 1.0 |  |
| 1110-01-6  | 63  | 42  | 1.50 | 0.04880 | 0.00883 | 0.10020 | 0.01804 | 0.01489 | 0.00034 | 0.00531 | 0.00056 | 0.02 | 138 | 334 | 97  | 17 | 95 | 2.0 | 107 | 11 | 1.0 |  |
| 1110-01-7  | 177 | 72  | 2.47 | 0.05787 | 0.00562 | 0.12116 | 0.01166 | 0.01519 | 0.00031 | 0.00428 | 0.00037 | 0.06 | 525 | 221 | 116 | 11 | 97 | 2.0 | 86  | 7  | 0.8 |  |
| 1110-01-8  | 57  | 37  | 1.56 | 0.04756 | 0.00940 | 0.10060 | 0.01980 | 0.01534 | 0.00037 | 0.00428 | 0.00048 | 0.03 | 77  | 349 | 97  | 18 | 98 | 2.0 | 86  | 10 | 1.0 |  |
| 1110-01-9  | 368 | 123 | 2.99 | 0.04813 | 0.00507 | 0.10122 | 0.01058 | 0.01526 | 0.00033 | 0.00353 | 0.00028 | 0.07 | 106 | 232 | 98  | 10 | 98 | 2.0 | 71  | 6  | 1.0 |  |
| 1110-01-10 | 328 | 126 | 2.61 | 0.04847 | 0.00339 | 0.10055 | 0.00700 | 0.01504 | 0.00026 | 0.00408 | 0.00030 | 0.11 | 122 | 157 | 97  | 6  | 96 | 2.0 | 82  | 6  | 1.0 |  |

|    |            |      |      |      |         |         |         |         |         |         |         |         |      |      |     |      |    |      |      |      |     |     |
|----|------------|------|------|------|---------|---------|---------|---------|---------|---------|---------|---------|------|------|-----|------|----|------|------|------|-----|-----|
|    | 1110-01-11 | 81   | 40   | 2.03 | 0.04849 | 0.00964 | 0.10376 | 0.02053 | 0.01552 | 0.00039 | 0.00442 | 0.00046 | 0.03 | 123  | 354 | 100  | 19 | 99   | 2.0  | 89   | 9   | 1.0 |
|    | 1110-01-12 | 83   | 44   | 1.89 | 0.06289 | 0.00892 | 0.13053 | 0.01835 | 0.01506 | 0.00037 | 0.00436 | 0.00047 | 0.04 | 705  | 318 | 125  | 16 | 96   | 2.0  | 88   | 9   | 0.8 |
|    | 1110-01-13 | 81   | 43   | 1.86 | 0.05090 | 0.00883 | 0.10545 | 0.01820 | 0.01503 | 0.00036 | 0.00433 | 0.00048 | 0.03 | 236  | 339 | 102  | 17 | 96   | 2.0  | 87   | 10  | 0.9 |
|    | 1110-01-14 | 78   | 48   | 1.60 | 0.06169 | 0.00881 | 0.12684 | 0.01794 | 0.01492 | 0.00038 | 0.00480 | 0.00060 | 0.04 | 663  | 322 | 121  | 16 | 95   | 2.0  | 97   | 12  | 0.8 |
|    | 1110-01-15 | 125  | 55   | 2.27 | 0.05898 | 0.00762 | 0.12442 | 0.01593 | 0.01531 | 0.00036 | 0.00354 | 0.00036 | 0.04 | 566  | 293 | 119  | 14 | 98   | 2.0  | 71   | 7   | 0.8 |
| H2 | 1110-02-1D | 132  | 65   | 2.02 | 0.03925 | 0.00425 | 0.08269 | 0.00889 | 0.01529 | 0.00031 | 0.00406 | 0.00031 | 0.06 | -334 | 210 | 81   | 8  | 98   | 2.0  | 82   | 6   | 1.2 |
|    | 1110-02-2  | 192  | 74   | 2.60 | 0.04779 | 0.00618 | 0.09889 | 0.01271 | 0.01501 | 0.00031 | 0.00491 | 0.00039 | 0.04 | 89   | 258 | 96   | 12 | 96   | 2.0  | 99   | 8   | 1.0 |
|    | 1110-02-3  | 157  | 110  | 1.43 | 0.04707 | 0.00497 | 0.10075 | 0.01061 | 0.01553 | 0.00028 | 0.00329 | 0.00018 | 0.07 | 53   | 222 | 97   | 10 | 99   | 2.0  | 66   | 4   | 1.0 |
|    | 1110-02-4  | 295  | 125  | 2.36 | 0.04836 | 0.00363 | 0.10300 | 0.00770 | 0.01545 | 0.00026 | 0.00363 | 0.00024 | 0.09 | 117  | 169 | 100  | 7  | 99   | 2.0  | 73   | 5   | 1.0 |
|    | 1110-02-5  | 404  | 117  | 3.45 | 0.04782 | 0.00510 | 0.09921 | 0.01043 | 0.01504 | 0.00038 | 0.00078 | 0.00004 | 0.06 | 90   | 230 | 96   | 10 | 96   | 2.0  | 15.8 | 0.8 | 1.0 |
|    | 1110-02-6  | 303  | 89   | 3.39 | 0.04573 | 0.00409 | 0.09524 | 0.00846 | 0.01511 | 0.00028 | 0.00474 | 0.00041 | 0.07 | -16  | 193 | 92   | 8  | 97   | 2.0  | 96   | 8   | 1.1 |
|    | 1110-02-7  | 245  | 84   | 2.92 | 0.04795 | 0.00433 | 0.10263 | 0.00923 | 0.01553 | 0.00027 | 0.00298 | 0.00016 | 0.08 | 97   | 200 | 99   | 8  | 99   | 2.0  | 60   | 3   | 1.0 |
|    | 1110-02-8  | 100  | 58   | 1.73 | 0.04753 | 0.00495 | 0.09826 | 0.01017 | 0.01500 | 0.00028 | 0.00403 | 0.00030 | 0.06 | 76   | 224 | 95   | 9  | 96   | 2.0  | 81   | 6   | 1.0 |
|    | 1110-02-9  | 704  | 167  | 4.21 | 0.04626 | 0.00649 | 0.09592 | 0.01341 | 0.01504 | 0.00031 | 0.00212 | 0.00014 | 0.05 | 11   | 259 | 93   | 12 | 96   | 2.0  | 43   | 3   | 1.0 |
|    | 1110-02-10 | 362  | 99   | 3.65 | 0.05028 | 0.00279 | 0.10619 | 0.00587 | 0.01532 | 0.00025 | 0.00362 | 0.00026 | 0.13 | 208  | 128 | 102  | 5  | 98   | 2.0  | 73   | 5   | 1.0 |
|    | 1110-02-11 | 521  | 114  | 4.59 | 0.05505 | 0.00380 | 0.11444 | 0.00786 | 0.01508 | 0.00025 | 0.00205 | 0.00009 | 0.10 | 414  | 159 | 110  | 7  | 96   | 2.0  | 41   | 2   | 0.9 |
|    | 1110-02-12 | 516  | 95   | 5.44 | 0.04833 | 0.00410 | 0.10004 | 0.00843 | 0.01502 | 0.00028 | 0.00305 | 0.00021 | 0.08 | 115  | 191 | 97   | 8  | 96   | 2.0  | 62   | 4   | 1.0 |
|    | 1110-02-13 | 768  | 231  | 3.32 | 0.05027 | 0.00583 | 0.10875 | 0.01247 | 0.01569 | 0.00037 | 0.00465 | 0.00064 | 0.05 | 207  | 261 | 105  | 11 | 100  | 2.0  | 94   | 13  | 1.0 |
|    | 1110-02-14 | 301  | 139  | 2.16 | 0.04645 | 0.00274 | 0.09985 | 0.00585 | 0.01559 | 0.00029 | 0.00183 | 0.00012 | 0.14 | 21   | 129 | 97   | 5  | 100  | 2.0  | 37   | 2   | 1.0 |
|    | 1110-02-15 | 9    | 244  | 0.04 | 0.05447 | 0.00450 | 0.11291 | 0.00923 | 0.01504 | 0.00032 | 0.00273 | 0.00024 | 0.09 | 391  | 190 | 109  | 8  | 96   | 2.0  | 55   | 5   | 0.9 |
| H3 | 1110-03-1  | 171  | 45   | 3.79 | 0.04779 | 0.00716 | 0.09770 | 0.01457 | 0.01483 | 0.00032 | 0.00393 | 0.00027 | 0.04 | 89   | 282 | 95   | 13 | 95   | 2.0  | 79   | 5   | 1.0 |
|    | 1110-03-2  | 127  | 35   | 3.63 | 0.05058 | 0.00988 | 0.10227 | 0.01986 | 0.01466 | 0.00038 | 0.00421 | 0.00039 | 0.02 | 222  | 364 | 99   | 18 | 94   | 2.0  | 85   | 8   | 0.9 |
|    | 1110-03-3  | 142  | 49   | 2.93 | 0.04734 | 0.00645 | 0.09886 | 0.01340 | 0.01515 | 0.00030 | 0.00389 | 0.00029 | 0.04 | 66   | 268 | 96   | 12 | 97   | 2.0  | 78   | 6   | 1.0 |
|    | 1110-03-4  | 259  | 123  | 2.10 | 0.04786 | 0.00283 | 0.09969 | 0.00588 | 0.01511 | 0.00024 | 0.00360 | 0.00025 | 0.13 | 92   | 132 | 96   | 5  | 97   | 2.0  | 73   | 5   | 1.0 |
|    | 1110-03-5  | 991  | 383  | 2.59 | 0.04904 | 0.00122 | 0.10324 | 0.00265 | 0.01527 | 0.00021 | 0.00402 | 0.00024 | 0.32 | 150  | 60  | 100  | 2  | 98   | 1.0  | 81   | 5   | 1.0 |
|    | 1110-03-6  | 119  | 33   | 3.57 | 0.04805 | 0.00940 | 0.10060 | 0.01958 | 0.01518 | 0.00037 | 0.00334 | 0.00034 | 0.02 | 102  | 348 | 97   | 18 | 97   | 2.0  | 67   | 7   | 1.0 |
|    | 1110-03-7  | 120  | 39   | 3.04 | 0.04797 | 0.01036 | 0.10152 | 0.02178 | 0.01535 | 0.00045 | 0.00429 | 0.00047 | 0.02 | 98   | 375 | 98   | 20 | 98   | 3.0  | 87   | 9   | 1.0 |
|    | 1110-03-8  | 137  | 48   | 2.85 | 0.04776 | 0.00659 | 0.09863 | 0.01355 | 0.01498 | 0.00030 | 0.00408 | 0.00033 | 0.04 | 87   | 276 | 96   | 13 | 96   | 2.0  | 82   | 7   | 1.0 |
|    | 1110-03-9  | 124  | 39   | 3.19 | 0.04807 | 0.00772 | 0.10412 | 0.01665 | 0.01571 | 0.00035 | 0.00416 | 0.00034 | 0.04 | 103  | 299 | 101  | 15 | 100  | 2.0  | 84   | 7   | 1.0 |
|    | 1110-03-10 | 201  | 54   | 3.74 | 0.04759 | 0.00599 | 0.10008 | 0.01253 | 0.01525 | 0.00030 | 0.00367 | 0.00029 | 0.04 | 79   | 253 | 97   | 12 | 98   | 2.0  | 74   | 6   | 1.0 |
|    | 1110-03-11 | 379  | 195  | 1.94 | 0.04939 | 0.00256 | 0.10398 | 0.00536 | 0.01527 | 0.00026 | 0.00326 | 0.00030 | 0.15 | 166  | 119 | 100  | 5  | 98   | 2.0  | 66   | 6   | 1.0 |
|    | 1110-03-12 | 287  | 72   | 4.01 | 0.04963 | 0.00487 | 0.10422 | 0.01016 | 0.01523 | 0.00030 | 0.00369 | 0.00033 | 0.07 | 178  | 223 | 101  | 9  | 97   | 2.0  | 74   | 7   | 1.0 |
|    | 1110-03-13 | 190  | 61   | 3.13 | 0.04813 | 0.00531 | 0.10235 | 0.01123 | 0.01543 | 0.00030 | 0.00401 | 0.00036 | 0.06 | 106  | 238 | 99   | 10 | 99   | 2.0  | 81   | 7   | 1.0 |
|    | 1110-03-14 | 120  | 36   | 3.32 | 0.04370 | 0.01073 | 0.09095 | 0.02222 | 0.01510 | 0.00044 | 0.00571 | 0.00083 | 0.02 | -86  | 374 | 88   | 21 | 97   | 3.0  | 115  | 17  | 1.1 |
|    | 1110-03-15 | 126  | 39   | 3.24 | 0.04774 | 0.00805 | 0.09893 | 0.01662 | 0.01503 | 0.00033 | 0.00437 | 0.00045 | 0.04 | 86   | 310 | 96   | 15 | 96   | 2.0  | 88   | 9   | 1.0 |
| H4 | 1110-04-1  | 950  | 288  | 3.30 | 0.04978 | 0.00215 | 0.14692 | 0.00639 | 0.02140 | 0.00034 | 0.00375 | 0.00030 | 0.20 | 185  | 101 | 139  | 6  | 136  | 2.0  | 76   | 6   | 1.0 |
|    | 1110-04-2  | 867  | 441  | 1.97 | 0.04743 | 0.00175 | 0.11570 | 0.00432 | 0.01769 | 0.00027 | 0.00254 | 0.00018 | 0.23 | 71   | 82  | 111  | 4  | 113  | 2.0  | 51   | 4   | 1.0 |
|    | 1110-04-3  | 1591 | 1116 | 1.43 | 0.05086 | 0.00097 | 0.25867 | 0.00536 | 0.03688 | 0.00054 | 0.00704 | 0.00069 | 0.46 | 234  | 45  | 234  | 4  | 233  | 3.0  | 142  | 14  | 1.0 |
|    | 1110-04-4  | 1262 | 288  | 4.39 | 0.06079 | 0.00145 | 1.10608 | 0.02754 | 0.13204 | 0.00216 | 0.00918 | 0.00054 | 0.39 | 632  | 53  | 756  | 13 | 799  | 12.0 | 185  | 11  | 1.1 |
|    | 1110-04-5  | 323  | 396  | 0.81 | 0.05286 | 0.00120 | 0.38014 | 0.00912 | 0.05216 | 0.00079 | 0.00768 | 0.00057 | 0.40 | 323  | 53  | 327  | 7  | 328  | 5.0  | 155  | 11  | 1.0 |
|    | 1110-04-6  | 231  | 64   | 3.62 | 0.05272 | 0.00693 | 0.25371 | 0.03308 | 0.03489 | 0.00085 | 0.00865 | 0.00140 | 0.05 | 317  | 298 | 230  | 27 | 221  | 5.0  | 174  | 28  | 1.0 |
|    | 1110-04-7  | 92   | 69   | 1.33 | 0.10498 | 0.00207 | 0.24939 | 0.09024 | 0.29353 | 0.00446 | 0.04519 | 0.00426 | 0.45 | 1714 | 37  | 1684 | 17 | 1659 | 22.0 | 893  | 82  | 1.0 |
|    | 1110-04-8  | 145  | 43   | 3.40 | 0.04889 | 0.01649 | 0.11820 | 0.03970 | 0.01753 | 0.00062 | 0.00286 | 0.00048 | 0.01 | 143  | 571 | 113  | 36 | 112  | 4.0  | 58   | 10  | 1.0 |
|    | 1110-04-9  | 2431 | 297  | 8.18 | 0.04902 | 0.00177 | 0.24727 | 0.00905 | 0.03660 | 0.00060 | 0.00369 | 0.00025 | 0.25 | 149  | 85  | 224  | 7  | 232  | 4.0  | 74   | 5   | 1.0 |
|    |            |      |      |      |         |         |         |         |         |         |         |         |      |      |     |      |    |      |      |      |     |     |

|               |        |       |      |         |         |         |         |         |         |         |         |      |      |     |     |    |     |     |     |    |     |
|---------------|--------|-------|------|---------|---------|---------|---------|---------|---------|---------|---------|------|------|-----|-----|----|-----|-----|-----|----|-----|
| 13105-03zk-06 | 603.1  | 200.9 | 3.00 | 0.04834 | 0.00867 | 0.13867 | 0.02463 | 0.02083 | 0.00065 | 0.00684 | 0.00361 | 0.01 | 116  | 290 | 132 | 22 | 133 | 4.0 | 138 | 72 | 1.0 |
| 13105-03zk-07 | 530.5  | 164.8 | 3.22 | 0.02931 | 0.01124 | 0.07913 | 0.03023 | 0.01958 | 0.00078 | 0.00146 | 0.00025 | 0.01 | 314  | 410 | 77  | 28 | 125 | 5.0 | 29  | 5  | 1.6 |
| 13105-03zk-08 | 615.1  | 199.6 | 3.08 | 0.04828 | 0.00500 | 0.13520 | 0.01395 | 0.02031 | 0.00040 | 0.00788 | 0.00259 | 0.01 | 113  | 194 | 129 | 12 | 130 | 3.0 | 159 | 52 | 1.0 |
| 13105-03zk-09 | 418.8  | 113.9 | 3.68 | 0.04941 | 0.00833 | 0.13445 | 0.02258 | 0.01974 | 0.00046 | 0.00742 | 0.00224 | 0.01 | 167  | 296 | 128 | 20 | 126 | 3.0 | 149 | 45 | 1.0 |
| 13105-03zk-10 | 1203.8 | 262.7 | 4.58 | 0.04408 | 0.00353 | 0.12151 | 0.00973 | 0.02000 | 0.00035 | 0.00465 | 0.00094 | 0.01 | -66  | 140 | 116 | 9  | 128 | 2.0 | 94  | 19 | 1.1 |
| 13105-03zk-11 | 392.6  | 144.8 | 2.71 | 0.03221 | 0.00896 | 0.08972 | 0.02489 | 0.02021 | 0.00059 | 0.00309 | 0.00059 | 0.01 | -189 | 302 | 87  | 23 | 129 | 4.0 | 62  | 12 | 1.5 |
| 13105-03zk-12 | 313.2  | 116.8 | 2.68 | 0.04816 | 0.01013 | 0.14065 | 0.02939 | 0.02118 | 0.00062 | 0.00672 | 0.00278 | 0.01 | 107  | 332 | 134 | 26 | 135 | 4.0 | 135 | 56 | 1.0 |
| 13105-03zk-13 | 875.5  | 191.3 | 4.58 | 0.04918 | 0.00797 | 0.14293 | 0.02291 | 0.02110 | 0.00062 | 0.00831 | 0.00459 | 0.01 | 156  | 274 | 136 | 20 | 135 | 4.0 | 167 | 92 | 1.0 |
| 13105-03zk-14 | 2533.5 | 467.8 | 5.42 | 0.04923 | 0.00238 | 0.13743 | 0.00670 | 0.02025 | 0.00034 | 0.00444 | 0.00101 | 0.01 | 159  | 82  | 131 | 6  | 129 | 2.0 | 90  | 20 | 1.0 |
| 13105-03zk-15 | 841.3  | 191.1 | 4.40 | 0.04792 | 0.00573 | 0.13782 | 0.01637 | 0.02086 | 0.00046 | 0.00576 | 0.00225 | 0.01 | 95   | 221 | 131 | 15 | 133 | 3.0 | 116 | 45 | 1.0 |

L9, Jikou-Longdong of Shaxian county in Shaxian Basin

|               |              |               |       |      |         |         |         |         |         |         |         |         |         |      |     |     |     |     |     |     |    |     |
|---------------|--------------|---------------|-------|------|---------|---------|---------|---------|---------|---------|---------|---------|---------|------|-----|-----|-----|-----|-----|-----|----|-----|
| I1            | SX-04-01     | 197           | 38    | 5.23 | 0.04862 | 0.00897 | 0.09676 | 0.01752 | 0.01444 | 0.00055 | 0.00363 | 0.00034 | 0.01    | 130  | 292 | 94  | 16  | 92  | 3.0 | 73  | 7  | 1.0 |
|               | SX-04-02     | 129           | 21    | 6.25 | 0.04800 | 0.01681 | 0.09750 | 0.03360 | 0.01473 | 0.00095 | 0.00353 | 0.00052 | 0.01    | 99   | 481 | 94  | 31  | 94  | 6.0 | 71  | 10 | 1.0 |
|               | SX-04-03     | 156           | 24    | 6.62 | 0.04815 | 0.01049 | 0.09709 | 0.02087 | 0.01463 | 0.00056 | 0.00435 | 0.00034 | 0.01    | 107  | 333 | 94  | 19  | 94  | 4.0 | 88  | 7  | 1.0 |
|               | SX-04-04     | 143           | 21    | 6.69 | 0.05012 | 0.01475 | 0.09968 | 0.02887 | 0.01443 | 0.00079 | 0.00324 | 0.00040 | 0.01    | 201  | 429 | 96  | 27  | 92  | 5.0 | 65  | 8  | 1.0 |
|               | SX-04-05     | 139           | 26    | 5.24 | 0.04894 | 0.00773 | 0.09883 | 0.01542 | 0.01465 | 0.00042 | 0.00429 | 0.00030 | 0.02    | 145  | 266 | 96  | 14  | 94  | 3.0 | 87  | 6  | 1.0 |
|               | SX-04-06     | 60            | 12    | 4.85 | 0.04936 | 0.02134 | 0.09834 | 0.04208 | 0.01445 | 0.00091 | 0.00400 | 0.00067 | 0.00    | 165  | 636 | 95  | 39  | 92  | 6.0 | 81  | 13 | 1.0 |
|               | SX-04-07     | 379           | 82    | 4.63 | 0.04849 | 0.00333 | 0.09859 | 0.00663 | 0.01475 | 0.00029 | 0.00383 | 0.00020 | 0.07    | 123  | 114 | 95  | 6   | 94  | 2.0 | 77  | 4  | 1.0 |
|               | SX-04-08     | 63            | 14    | 4.67 | 0.04861 | 0.01795 | 0.09685 | 0.03533 | 0.01445 | 0.00087 | 0.00461 | 0.00064 | 0.01    | 129  | 526 | 94  | 33  | 92  | 6.0 | 93  | 13 | 1.0 |
|               | SX-04-09     | 84            | 17    | 4.81 | 0.04857 | 0.02385 | 0.09657 | 0.04669 | 0.01442 | 0.00127 | 0.00370 | 0.00080 | 0.00    | 127  | 690 | 94  | 43  | 92  | 8.0 | 75  | 16 | 1.0 |
|               | SX-04-10     | 117           | 25    | 4.68 | 0.04787 | 0.01162 | 0.09681 | 0.02314 | 0.01467 | 0.00067 | 0.00485 | 0.00048 | 0.01    | 93   | 352 | 94  | 21  | 94  | 4.0 | 98  | 10 | 1.0 |
|               | SX-04-11     | 303           | 66    | 4.56 | 0.05510 | 0.00428 | 0.10961 | 0.00828 | 0.01443 | 0.00033 | 0.00350 | 0.00018 | 0.06    | 416  | 128 | 106 | 8   | 92  | 2.0 | 71  | 4  | 0.9 |
|               | SX-04-12     | 415           | 60    | 6.97 | 0.05314 | 0.00742 | 0.10592 | 0.01433 | 0.01446 | 0.00054 | 0.00411 | 0.00026 | 0.02    | 335  | 235 | 102 | 13  | 93  | 3.0 | 83  | 5  | 0.9 |
|               | SX-04-13     | 108           | 24    | 4.45 | 0.05356 | 0.00825 | 0.10837 | 0.01637 | 0.01468 | 0.00049 | 0.00413 | 0.00032 | 0.02    | 353  | 275 | 104 | 15  | 94  | 3.0 | 83  | 6  | 0.9 |
|               | SX-04-14     | 131           | 28    | 4.74 | 0.05405 | 0.00867 | 0.10806 | 0.01700 | 0.01450 | 0.00050 | 0.00400 | 0.00031 | 0.02    | 373  | 287 | 104 | 16  | 93  | 3.0 | 81  | 6  | 0.9 |
|               | SX-04-15     | 267           | 42    | 6.38 | 0.05038 | 0.00502 | 0.10193 | 0.00997 | 0.01468 | 0.00035 | 0.00383 | 0.00018 | 0.04    | 213  | 176 | 99  | 9   | 94  | 2.0 | 77  | 4  | 0.9 |
| I2            | 150122-01-01 | 218.9         | 86.5  | 2.53 | 0.04927 | 0.00484 | 0.09848 | 0.00932 | 0.01450 | 0.00044 | 0.00404 | 0.00028 | 0.04    | 161  | 223 | 95  | 9   | 93  | 3.0 | 81  | 6  | 1.0 |
|               | 150122-01-02 | 372.3         | 143.0 | 2.60 | 0.04863 | 0.00214 | 0.09788 | 0.00417 | 0.01461 | 0.00025 | 0.00423 | 0.00017 | 0.12    | 130  | 101 | 95  | 4   | 94  | 2.0 | 85  | 3  | 1.0 |
|               | 150122-01-03 | 38.1          | 16.3  | 2.33 | 0.04703 | 0.00976 | 0.10572 | 0.02158 | 0.01631 | 0.00066 | 0.00344 | 0.00030 | 0.01    | 51   | 357 | 102 | 20  | 104 | 4.0 | 69  | 6  | 1.0 |
|               | 150122-01-04 | 193.2         | 85.1  | 2.27 | 0.04755 | 0.00309 | 0.09939 | 0.00626 | 0.01516 | 0.00033 | 0.00440 | 0.00021 | 0.08    | 77   | 145 | 96  | 6   | 97  | 2.0 | 89  | 4  | 1.0 |
|               | 150122-01-05 | 164.2         | 72.0  | 2.28 | 0.04775 | 0.00376 | 0.10487 | 0.00799 | 0.01593 | 0.00039 | 0.00458 | 0.00027 | 0.05    | 87   | 176 | 101 | 7   | 102 | 2.0 | 92  | 5  | 1.0 |
|               | 150122-01-06 | 754.6         | 247.0 | 3.05 | 0.04815 | 0.00264 | 0.10353 | 0.00546 | 0.01560 | 0.00034 | 0.00300 | 0.00018 | 0.11    | 107  | 123 | 100 | 5   | 100 | 2.0 | 61  | 4  | 1.0 |
|               | 150122-01-07 | 144.6         | 72.0  | 2.01 | 0.05397 | 0.00407 | 0.10545 | 0.00763 | 0.01417 | 0.00036 | 0.00410 | 0.00027 | 0.05    | 370  | 174 | 102 | 7   | 91  | 2.0 | 83  | 5  | 0.9 |
|               | 150122-01-08 | 319.5         | 124.4 | 2.57 | 0.04847 | 0.00219 | 0.10070 | 0.00441 | 0.01507 | 0.00027 | 0.00407 | 0.00019 | 0.13    | 122  | 103 | 97  | 4   | 96  | 2.0 | 82  | 4  | 1.0 |
|               | 150122-01-10 | 133.0         | 65.9  | 2.02 | 0.04734 | 0.00360 | 0.09842 | 0.00727 | 0.01508 | 0.00035 | 0.00429 | 0.00027 | 0.06    | 66   | 170 | 95  | 7   | 96  | 2.0 | 87  | 5  | 1.0 |
|               | 150122-01-11 | 401.9         | 116.2 | 3.46 | 0.04833 | 0.00226 | 0.09583 | 0.00434 | 0.01438 | 0.00026 | 0.00408 | 0.00015 | 0.12    | 115  | 106 | 93  | 4   | 92  | 2.0 | 82  | 3  | 1.0 |
|               | 150122-01-12 | 207.0         | 70.6  | 2.93 | 0.04936 | 0.00419 | 0.10902 | 0.00894 | 0.01602 | 0.00042 | 0.00503 | 0.00029 | 0.05    | 165  | 192 | 105 | 8   | 102 | 3.0 | 101 | 6  | 1.0 |
|               | 150122-01-13 | 384.4         | 205.2 | 1.87 | 0.04807 | 0.00250 | 0.10308 | 0.00515 | 0.01556 | 0.00031 | 0.00421 | 0.00025 | 0.09    | 103  | 117 | 100 | 5   | 100 | 2.0 | 85  | 5  | 1.0 |
|               | 150122-01-14 | 199.1         | 92.3  | 2.16 | 0.04792 | 0.00223 | 0.09446 | 0.00428 | 0.01430 | 0.00025 | 0.00405 | 0.00015 | 0.12    | 95   | 105 | 92  | 4   | 92  | 2.0 | 82  | 3  | 1.0 |
|               | 150122-01-15 | 151.1         | 71.2  | 2.12 | 0.04845 | 0.00377 | 0.09668 | 0.00729 | 0.01448 | 0.00034 | 0.00438 | 0.00025 | 0.05    | 121  | 175 | 94  | 7   | 93  | 2.0 | 88  | 5  | 1.0 |
|               | 150122-01-16 | 464.6         | 193.1 | 2.41 | 0.04780 | 0.00163 | 0.09836 | 0.00325 | 0.01493 | 0.00025 | 0.00437 | 0.00017 | 0.19    | 89   | 77  | 95  | 3   | 96  | 2.0 | 88  | 3  | 1.0 |
|               | 150122-01-17 | 136.4         | 49.4  | 2.76 | 0.04814 | 0.00343 | 0.09773 | 0.00680 | 0.01473 | 0.00031 | 0.00438 | 0.00019 | 0.07    | 106  | 160 | 95  | 6   | 94  | 2.0 | 88  | 4  | 1.0 |
|               | 150122-01-18 | 138.9         | 58.2  | 2.38 | 0.04902 | 0.00417 | 0.09856 | 0.00814 | 0.01459 | 0.00036 | 0.00428 | 0.00026 | 0.05    | 149  | 193 | 95  | 8   | 93  | 2.0 | 86  | 5  | 1.0 |
|               | 150122-01-19 | 944.2         | 260.5 | 3.62 | 0.04830 | 0.00261 | 0.10432 | 0.00542 | 0.01567 | 0.00033 | 0.00451 | 0.00033 | 0.10    | 114  | 122 | 101 | 5   | 100 | 2.0 | 91  | 7  | 1.0 |
|               | 150122-01-20 | 304.8         | 143.1 | 2.13 | 0.05020 | 0.00382 | 0.10499 | 0.00769 | 0.01518 | 0.00039 | 0.00543 | 0.00050 | 0.06    | 204  | 174 | 101 | 7   | 97  | 2.0 | 109 | 10 | 1.0 |
|               | I3           | 13106-02zk-01 | 1820  | 573  | 3.18    | 0.04866 | 0.00422 | 0.14537 | 0.01247 | 0.02167 | 0.00053 | 0.00334 | 0.00055 | 0.01 | 131 | 146 | 138 | 11  | 138 | 3.0 | 67 | 11  |
| 13106-02zk-02 |              | 418           | 112   | 3.74 | 0.04778 | 0.01009 | 0.14077 | 0.02957 | 0.02137 | 0.00062 | 0.00436 | 0.00061 | 0.01    | 88   | 328 | 134 | 26  | 136 | 4.0 | 88  | 12 | 1.0 |
| 13106-02zk-03 |              | 572           | 177   | 3.23 | 0.05854 | 0.00550 | 0.18622 | 0.01735 | 0.02307 | 0.00047 | 0.00698 | 0.00160 | 0.01    | 550  | 170 | 173 | 15  | 147 | 3.0 | 141 | 32 | 0.8 |
| 13106-02zk-04 |              | 1960          | 643   | 3.05 | 0.05964 | 0.00273 | 0.16468 | 0.00749 | 0.02003 | 0.00034 | 0.00672 | 0.00187 | 0.01    | 591  | 69  | 155 | 7   | 128 | 2.0 | 135 | 38 | 0.8 |
| 13106-02zk-05 |              | 788           | 314   | 2.51 | 0.05299 | 0.00362 | 0.15927 | 0.01087 | 0.02181 | 0.00041 | 0.00525 | 0.00097 | 0.01    | 328  | 121 | 150 | 10  | 139 | 3.0 | 106 | 20 | 0.9 |
| 13106-02zk-06 |              | 430           | 146   | 2.94 | 0.04518 | 0.00727 | 0.12491 | 0.02002 | 0.02006 | 0.00046 | 0.00421 | 0.00068 | 0.01    | -10  | 248 | 120 | 18  | 128 | 3.0 | 85  | 14 | 1.1 |
| 13106-02zk-07 |              | 174           | 59    | 2.94 | 0.04884 | 0.01623 | 0.13906 | 0.04604 | 0.02065 | 0.00069 | 0.00732 | 0.00182 | 0.01    | 140  | 509 | 132 | 41  | 132 | 4.0 | 147 | 37 | 1.0 |
| 13106-02zk-08 |              | 1738          | 568   | 3.06 | 0.04831 | 0.00209 | 0.13889 | 0.00609 | 0.02086 | 0.00034 | 0.00591 | 0.00124 | 0.01    | 114  | 71  | 132 | 5   | 133 | 2.0 | 119 | 25 | 1.0 |
| 13106-02zk-09 |              | 911           | 230   | 3.96 | 0.05160 | 0.00585 | 0.14887 | 0.01677 | 0.02094 | 0.00048 | 0.00637 | 0.00181 | 0.01    | 268  | 212 | 141 | 15  | 134 | 3.0 | 128 | 36 | 1.0 |
| 13106-02zk-10 |              | 579           | 208   | 2.79 | 0.04106 | 0.00519 | 0.11832 | 0.01492 | 0.02090 | 0.00043 | 0.00486 | 0.00097 | 0.01    | -229 | 184 | 114 | 14  | 133 | 3.0 | 98  | 20 | 1.2 |
| 13106-02zk-11 |              | 1403          | 578   | 2.43 | 0.05133 | 0.00227 | 0.14555 | 0.00650 | 0.02057 | 0.00034 | 0.00608 | 0.00157 | 0.01    | 256  | 72  | 138 | 6   | 131 | 2.0 | 123 | 32 | 0.9 |
| 13106-02zk-12 |              | 169           | 55    | 3.06 | 0.04586 | 0.01607 | 0.13802 | 0.04823 | 0.02183 | 0.00071 | 0.00437 | 0.00089 | 0.01    | -9   | 516 | 131 | 43  | 139 | 4.0 | 88  | 18 | 1.1 |
| 13106-02zk-13 |              | 1017          | 774   | 1.31 | 0.04920 | 0.00191 | 0.14069 | 0.00556 | 0.02075 | 0.00033 | 0.00610 | 0.00170 | 0.01    | 157  | 63  | 134 | 5   | 132 | 2.0 | 123 | 34 | 1.0 |
| 13106-02zk-14 |              | 509           | 130   | 3.93 | 0.04987 | 0.00811 | 0.14971 | 0.02424 | 0.02178 | 0.00053 | 0.00560 | 0.00177 | 0.01    | 189  | 287 | 142 | 21  | 139 | 3.0 | 113 | 36 | 1.0 |
| 13106-02zk-15 |              | 870           | 239   | 3.65 | 0.04894 | 0.00677 | 0.14654 | 0.02010 | 0.02173 | 0.00060 | 0.00297 | 0.00066 | 0.01    | 145  | 247 | 139 | 18  | 139 | 4.0 | 60  | 13 | 1.0 |
| I4            | 1111-01-2-1  | 1926          | 504   | 3.82 | 0.04895 | 0.00237 | 0.12060 | 0.00580 | 0.01788 | 0.00032 | 0.00156 | 0.00009 | 0.17    | 145  | 111 | 116 | 5   | 114 | 2.0 | 32  | 2  | 1.0 |
|               | 1111-01-2-5  | 584           | 154   | 3.79 | 0.07169 | 0.00659 | 0.15982 | 0.01444 | 0.01618 | 0.00039 | 0.00149 | 0.00012 | 0.07    | 977  | 194 | 151 | 13  | 103 | 2.0 | 30  | 2  | 0.7 |
|               | 1111-01-2-6  | 1356          | 325   | 4.17 | 0.05196 | 0.00304 | 0.12735 | 0.00741 | 0.01778 | 0.00031 | 0.00497 | 0.00102 | 0.13    | 284  | 136 | 122 | 7   | 114 | 2.0 | 100 | 21 | 0.9 |
|               | 1111-01-2-2  | 645           | 153   | 4.22 | 0.04842 | 0.00337 | 0.16706 | 0.01162 | 0.02503 | 0.00043 | 0.00360 | 0.00029 | 0.12    | 120  | 156 | 157 | 10  | 159 | 3.0 | 73  | 6  | 1.0 |
|               | 1111-01-2-11 | 570           | 232   | 2.45 | 0.04884 | 0.00251 | 0.18010 | 0.00928 | 0.02676 | 0.00045 | 0.00399 | 0.00041 | 0.17    | 140  | 117 | 166 | 8   | 170 | 3.0 | 80  | 8  | 1.0 |
|               | 1111-01-2-12 | 988           | 236   | 4.19 | 0.05014 | 0.00217 | 0.24948 | 0.01081 | 0.03610 | 0.00062 | 0.00378 | 0.00031 | 0.20    | 201  | 102 | 228 | 9   | 229 | 4.0 | 76  | 6  | 1.0 |
|               |              |               |       |      |         |         |         |         |         |         |         |         |         |      |     |     |     |     |     |     |    |     |

|            |     |     |      |         |         |         |         |         |         |         |         |      |      |      |     |     |     |     |     |    |     |
|------------|-----|-----|------|---------|---------|---------|---------|---------|---------|---------|---------|------|------|------|-----|-----|-----|-----|-----|----|-----|
| 1110-06-6  | 212 | 33  | 6.48 | 0.05094 | 0.02894 | 0.10678 | 0.06046 | 0.01521 | 0.00075 | 0.00531 | 0.00132 | 0.01 | 238  | 995  | 103 | 55  | 97  | 5.0 | 107 | 27 | 0.9 |
| 1110-06-7  | 323 | 53  | 6.09 | 0.04739 | 0.01581 | 0.10461 | 0.03477 | 0.01601 | 0.00054 | 0.00201 | 0.00025 | 0.01 | 69   | 548  | 101 | 32  | 102 | 3.0 | 41  | 5  | 1.0 |
| 1110-06-8  | 473 | 61  | 7.76 | 0.04541 | 0.01509 | 0.09563 | 0.03165 | 0.01528 | 0.00054 | 0.00152 | 0.00015 | 0.02 | -33  | 532  | 93  | 29  | 98  | 3.0 | 31  | 3  | 1.1 |
| 1110-06-9  | 414 | 63  | 6.53 | 0.04997 | 0.01459 | 0.10401 | 0.03025 | 0.01510 | 0.00047 | 0.00384 | 0.00083 | 0.02 | 194  | 502  | 100 | 28  | 97  | 3.0 | 77  | 17 | 1.0 |
| 1110-06-10 | 362 | 52  | 7.02 | 0.04702 | 0.01600 | 0.09971 | 0.03381 | 0.01538 | 0.00051 | 0.00204 | 0.00024 | 0.01 | 50   | 557  | 97  | 31  | 98  | 3.0 | 41  | 5  | 1.0 |
| 1110-06-11 | 83  | 46  | 5.18 | 0.08843 | 0.06050 | 0.18434 | 0.12494 | 0.01513 | 0.00144 | 0.00406 | 0.00168 | 0.01 | 1392 | 1405 | 172 | 107 | 97  | 9.0 | 82  | 34 | 0.6 |
| 1110-06-12 | 846 | 87  | 9.70 | 0.04745 | 0.00891 | 0.10450 | 0.01954 | 0.01597 | 0.00038 | 0.00187 | 0.00020 | 0.03 | 72   | 332  | 101 | 18  | 102 | 2.0 | 38  | 4  | 1.0 |
| 1110-06-13 | 653 | 213 | 3.07 | 0.04519 | 0.00426 | 0.09620 | 0.00903 | 0.01544 | 0.00030 | 0.00168 | 0.00018 | 0.08 | -10  | 191  | 93  | 8   | 99  | 2.0 | 34  | 4  | 1.1 |
| 1110-06-14 | 537 | 166 | 3.23 | 0.04301 | 0.00512 | 0.09425 | 0.01117 | 0.01590 | 0.00033 | 0.00158 | 0.00017 | 0.06 | -123 | 202  | 91  | 10  | 102 | 2.0 | 32  | 3  | 1.1 |
| 1110-06-15 | 408 | 94  | 4.35 | 0.04481 | 0.00935 | 0.09417 | 0.01958 | 0.01525 | 0.00038 | 0.00166 | 0.00021 | 0.03 | -29  | 328  | 91  | 18  | 98  | 2.0 | 34  | 4  | 1.1 |

L10, Xiadu-Jishan of Yong'an county in Yong'an Basin

|    |            |      |      |      |         |         |         |         |         |         |         |         |      |      |     |     |    |     |     |     |    |     |
|----|------------|------|------|------|---------|---------|---------|---------|---------|---------|---------|---------|------|------|-----|-----|----|-----|-----|-----|----|-----|
|    | 0125-05-1  | 777  | 206  | 3.76 | 0.05097 | 0.00194 | 0.14445 | 0.00543 | 0.02056 | 0.00038 | 0.00199 | 0.00009 | 0.22 | 239  | 90  | 137 | 5  | 131 | 2.0 | 40  | 2  | 1.0 |
|    | 0125-05-2  | 718  | 137  | 5.25 | 0.04813 | 0.00158 | 0.13966 | 0.00458 | 0.02103 | 0.00035 | 0.00237 | 0.00008 | 0.25 | 106  | 76  | 133 | 4  | 134 | 2.0 | 48  | 2  | 1.0 |
|    | 0125-05-17 | 709  | 243  | 2.92 | 0.04932 | 0.00123 | 0.14261 | 0.00367 | 0.02097 | 0.00032 | 0.00401 | 0.00018 | 0.35 | 163  | 60  | 135 | 3  | 134 | 2.0 | 81  | 4  | 1.0 |
|    | 0125-05-13 | 345  | 81   | 4.24 | 0.04785 | 0.00161 | 0.14101 | 0.00473 | 0.02138 | 0.00032 | 0.00610 | 0.00029 | 0.22 | 92   | 76  | 134 | 4  | 136 | 2.0 | 123 | 6  | 1.0 |
|    | 0125-05-18 | 522  | 142  | 3.69 | 0.05088 | 0.00193 | 0.15030 | 0.00566 | 0.02143 | 0.00038 | 0.00402 | 0.00021 | 0.22 | 235  | 90  | 142 | 5  | 137 | 2.0 | 81  | 4  | 1.0 |
|    | 0125-05-5  | 881  | 304  | 2.90 | 0.08302 | 0.00147 | 0.24987 | 0.00474 | 0.02182 | 0.00032 | 0.00374 | 0.00013 | 0.47 | 1270 | 35  | 226 | 4  | 139 | 2.0 | 75  | 3  | 0.6 |
|    | 0125-05-12 | 528  | 99   | 5.35 | 0.09317 | 0.00631 | 0.29099 | 0.01846 | 0.02265 | 0.00067 | 0.00373 | 0.00030 | 0.08 | 1491 | 132 | 259 | 15 | 144 | 4.0 | 75  | 6  | 0.6 |
|    | 0125-05-3  | 928  | 190  | 4.87 | 0.06161 | 0.00345 | 0.19749 | 0.01061 | 0.02324 | 0.00053 | 0.00503 | 0.00045 | 0.11 | 661  | 123 | 183 | 9  | 148 | 3.0 | 101 | 9  | 0.8 |
|    | 0125-05-9  | 685  | 119  | 5.76 | 0.06314 | 0.00285 | 0.20293 | 0.00877 | 0.02332 | 0.00044 | 0.00620 | 0.00059 | 0.11 | 713  | 98  | 188 | 7  | 149 | 3.0 | 125 | 12 | 0.8 |
|    | 0125-05-11 | 2378 | 491  | 4.84 | 0.05524 | 0.00124 | 0.18173 | 0.00417 | 0.02386 | 0.00034 | 0.00781 | 0.00058 | 0.35 | 422  | 51  | 170 | 4  | 152 | 2.0 | 157 | 12 | 0.9 |
|    | 0125-05-15 | 302  | 113  | 2.68 | 0.05257 | 0.00206 | 0.17446 | 0.00667 | 0.02407 | 0.00040 | 0.00849 | 0.00073 | 0.16 | 310  | 91  | 163 | 6  | 153 | 3.0 | 171 | 15 | 0.9 |
|    | 0125-05-6  | 797  | 111  | 7.19 | 0.04881 | 0.00213 | 0.16265 | 0.00698 | 0.02416 | 0.00045 | 0.00339 | 0.00017 | 0.18 | 139  | 100 | 153 | 6  | 154 | 3.0 | 68  | 3  | 1.0 |
|    | 0125-05-16 | 915  | 178  | 5.15 | 0.04862 | 0.00118 | 0.16182 | 0.00404 | 0.02414 | 0.00035 | 0.00548 | 0.00025 | 0.34 | 130  | 58  | 152 | 4  | 154 | 2.0 | 110 | 5  | 1.0 |
|    | 0125-05-14 | 849  | 338  | 2.51 | 0.04925 | 0.00166 | 0.16552 | 0.00558 | 0.02438 | 0.00042 | 0.00454 | 0.00029 | 0.26 | 160  | 80  | 156 | 5  | 155 | 3.0 | 92  | 6  | 1.0 |
|    | 0125-05-7  | 561  | 199  | 2.82 | 0.04861 | 0.00127 | 0.16407 | 0.00438 | 0.02446 | 0.00038 | 0.00302 | 0.00013 | 0.33 | 129  | 63  | 154 | 4  | 156 | 2.0 | 61  | 3  | 1.0 |
|    | 0125-05-10 | 333  | 93   | 3.58 | 0.04840 | 0.00191 | 0.16307 | 0.00636 | 0.02443 | 0.00043 | 0.00369 | 0.00022 | 0.20 | 119  | 91  | 153 | 6  | 156 | 3.0 | 74  | 4  | 1.0 |
|    | 0125-05-8  | 670  | 232  | 2.88 | 0.04768 | 0.00152 | 0.16191 | 0.00516 | 0.02461 | 0.00041 | 0.00288 | 0.00017 | 0.26 | 83   | 72  | 152 | 5  | 157 | 3.0 | 58  | 3  | 1.0 |
|    | 0125-05-4  | 1932 | 403  | 4.79 | 0.05035 | 0.00090 | 0.17420 | 0.00338 | 0.02508 | 0.00036 | 0.00424 | 0.00013 | 0.47 | 211  | 42  | 163 | 3  | 160 | 2.0 | 86  | 3  | 1.0 |
|    | 0125-05-20 | 632  | 195  | 3.24 | 0.05085 | 0.00107 | 0.17606 | 0.00389 | 0.02512 | 0.00036 | 0.00500 | 0.00023 | 0.40 | 234  | 50  | 165 | 3  | 160 | 2.0 | 101 | 5  | 1.0 |
|    | 0125-05-19 | 675  | 104  | 6.47 | 0.05112 | 0.00293 | 0.18737 | 0.01046 | 0.02658 | 0.00058 | 0.00375 | 0.00026 | 0.13 | 246  | 133 | 174 | 9  | 169 | 4.0 | 76  | 5  | 1.0 |
| J2 | YA-01-01   | 548  | 252  | 2.18 | 0.04749 | 0.00158 | 0.16788 | 0.00548 | 0.02564 | 0.00038 | 0.00674 | 0.00031 | 0.18 | 74   | 75  | 158 | 5  | 163 | 2.0 | 136 | 6  | 1.0 |
|    | YA-01-02   | 480  | 156  | 3.08 | 0.05074 | 0.00234 | 0.17658 | 0.00794 | 0.02524 | 0.00044 | 0.00682 | 0.00033 | 0.13 | 229  | 109 | 165 | 7  | 161 | 3.0 | 137 | 7  | 1.0 |
|    | YA-01-03   | 601  | 204  | 2.94 | 0.04940 | 0.00123 | 0.17072 | 0.00423 | 0.02507 | 0.00034 | 0.00701 | 0.00032 | 0.26 | 167  | 60  | 160 | 4  | 160 | 2.0 | 141 | 6  | 1.0 |
|    | YA-01-04   | 422  | 363  | 1.16 | 0.05352 | 0.00168 | 0.18651 | 0.00576 | 0.02527 | 0.00037 | 0.00713 | 0.00030 | 0.20 | 351  | 73  | 174 | 5  | 161 | 2.0 | 144 | 6  | 0.9 |
|    | YA-01-05   | 322  | 192  | 1.68 | 0.05554 | 0.00305 | 0.19223 | 0.01015 | 0.02510 | 0.00051 | 0.00720 | 0.00048 | 0.09 | 434  | 126 | 179 | 9  | 160 | 3.0 | 145 | 10 | 0.9 |
|    | YA-01-06   | 244  | 106  | 2.30 | 0.04981 | 0.00262 | 0.17145 | 0.00877 | 0.02496 | 0.00046 | 0.00663 | 0.00037 | 0.10 | 186  | 122 | 161 | 8  | 159 | 3.0 | 134 | 7  | 1.0 |
|    | YA-01-07   | 132  | 41   | 3.20 | 0.05624 | 0.00583 | 0.19320 | 0.01934 | 0.02492 | 0.00076 | 0.00687 | 0.00054 | 0.03 | 462  | 236 | 179 | 16 | 159 | 5.0 | 138 | 11 | 0.9 |
|    | YA-01-08   | 465  | 148  | 3.14 | 0.04880 | 0.00217 | 0.16768 | 0.00726 | 0.02492 | 0.00042 | 0.00711 | 0.00033 | 0.12 | 138  | 102 | 157 | 6  | 159 | 3.0 | 143 | 7  | 1.0 |
|    | YA-01-09   | 339  | 140  | 2.42 | 0.05377 | 0.00200 | 0.18346 | 0.00667 | 0.02474 | 0.00039 | 0.00720 | 0.00033 | 0.16 | 361  | 86  | 171 | 6  | 158 | 2.0 | 145 | 7  | 0.9 |
|    | YA-01-10   | 757  | 296  | 2.56 | 0.05004 | 0.00132 | 0.17282 | 0.00455 | 0.02505 | 0.00035 | 0.00662 | 0.00027 | 0.26 | 197  | 63  | 162 | 4  | 159 | 2.0 | 133 | 5  | 1.0 |
|    | YA-01-11   | 395  | 181  | 2.18 | 0.05395 | 0.00294 | 0.19571 | 0.01027 | 0.02631 | 0.00054 | 0.00769 | 0.00046 | 0.10 | 369  | 126 | 181 | 9  | 167 | 3.0 | 155 | 9  | 0.9 |
|    | YA-01-12   | 779  | 203  | 3.84 | 0.05040 | 0.00150 | 0.17481 | 0.00515 | 0.02516 | 0.00036 | 0.00710 | 0.00029 | 0.22 | 213  | 71  | 164 | 4  | 160 | 2.0 | 143 | 6  | 1.0 |
|    | YA-01-13   | 623  | 192  | 3.25 | 0.05317 | 0.00193 | 0.18291 | 0.00648 | 0.02495 | 0.00039 | 0.00672 | 0.00030 | 0.16 | 336  | 84  | 171 | 6  | 159 | 2.0 | 135 | 6  | 0.9 |
|    | YA-01-14   | 474  | 134  | 3.54 | 0.05005 | 0.00176 | 0.17114 | 0.00593 | 0.02480 | 0.00037 | 0.00697 | 0.00029 | 0.18 | 197  | 84  | 160 | 5  | 158 | 2.0 | 140 | 6  | 1.0 |
|    | YA-01-15   | 678  | 240  | 2.82 | 0.06317 | 0.00220 | 0.21800 | 0.00736 | 0.02503 | 0.00041 | 0.00788 | 0.00035 | 0.18 | 714  | 76  | 200 | 6  | 159 | 3.0 | 159 | 7  | 0.8 |
| J3 | YA02-1     | 1316 | 494  | 2.66 | 0.04918 | 0.00061 | 0.16031 | 0.00226 | 0.02361 | 0.00030 | 0.00320 | 0.00005 | 0.58 | 156  | 30  | 151 | 2  | 150 | 2.0 | 65  | 1  | 1.0 |
|    | YA02-2     | 249  | 102  | 2.43 | 0.04915 | 0.00125 | 0.16093 | 0.00414 | 0.02372 | 0.00033 | 0.00368 | 0.00009 | 0.29 | 155  | 61  | 152 | 4  | 151 | 2.0 | 74  | 2  | 1.0 |
|    | YA02-3     | 512  | 474  | 1.08 | 0.04820 | 0.00061 | 0.15944 | 0.00226 | 0.02398 | 0.00030 | 0.00382 | 0.00007 | 0.56 | 109  | 31  | 150 | 2  | 153 | 2.0 | 77  | 1  | 1.0 |
|    | YA02-4     | 441  | 197  | 2.25 | 0.05186 | 0.00113 | 0.16724 | 0.00373 | 0.02338 | 0.00033 | 0.00356 | 0.00010 | 0.35 | 279  | 51  | 157 | 3  | 149 | 2.0 | 72  | 2  | 0.9 |
|    | YA02-5     | 2927 | 1559 | 1.88 | 0.07485 | 0.00094 | 0.19279 | 0.00263 | 0.01869 | 0.00022 | 0.00513 | 0.00017 | 0.52 | 1064 | 26  | 179 | 2  | 119 | 1.0 | 103 | 3  | 0.7 |
|    | YA02-6     | 479  | 216  | 2.22 | 0.05342 | 0.00119 | 0.17113 | 0.00382 | 0.02324 | 0.00031 | 0.00559 | 0.00024 | 0.30 | 347  | 52  | 160 | 3  | 148 | 2.0 | 113 | 5  | 0.9 |
|    | YA02-7     | 244  | 107  | 2.27 | 0.05016 | 0.00097 | 0.16176 | 0.00324 | 0.02339 | 0.00030 | 0.00502 | 0.00013 | 0.37 | 202  | 46  | 152 | 3  | 149 | 2.0 | 101 | 3  | 1.0 |
|    | YA02-8     | 609  | 202  | 3.02 | 0.05625 | 0.00138 | 0.17937 | 0.00446 | 0.02316 | 0.00034 | 0.00425 | 0.00017 | 0.32 | 462  | 56  | 168 | 4  | 148 | 2.0 | 86  | 3  | 0.9 |
|    | YA02-9     | 374  | 189  | 1.98 | 0.05126 | 0.00106 | 0.16612 | 0.00359 | 0.02352 | 0.00033 | 0.00431 | 0.00014 | 0.39 | 253  | 49  | 156 | 3  | 150 | 2.0 | 87  | 3  | 1.0 |
|    | YA02-10    | 722  | 275  | 2.62 | 0.05454 | 0.00064 | 0.19749 | 0.00686 | 0.06617 | 0.00085 | 0.01229 | 0.00029 | 0.61 | 393  | 27  | 410 | 5  | 413 | 5.0 | 247 | 6  | 1.0 |
|    | YA02-11    | 399  | 132  | 3.02 | 0.05101 | 0.00101 | 0.16770 | 0.00347 | 0.02385 | 0.00032 | 0.00577 | 0.00019 | 0.39 | 241  | 47  | 157 | 3  | 152 | 2.0 | 116 | 4  | 1.0 |
|    | YA02-12    | 526  | 232  | 2.27 | 0.05131 | 0.00091 | 0.16618 | 0.00314 | 0.02350 | 0.00031 | 0.00586 | 0.00024 | 0.43 | 255  | 42  | 156 | 3  | 150 | 2.0 | 118 | 5  | 1.0 |
|    | YA02-13    | 640  | 312  | 2.05 | 0.04846 | 0.00107 | 0.16199 | 0.00380 | 0.02423 | 0.00037 | 0.00314 | 0.00013 | 0.41 | 122  | 53  | 152 | 3  | 154 | 2.0 | 63  | 3  | 1.0 |
|    | YA02-14    | 633  | 228  | 2.77 | 0.05020 | 0.00079 | 0.16494 | 0.00283 | 0.02384 | 0.00031 | 0.00640 | 0.00025 | 0.48 | 204  | 37  | 155 | 2  | 152 | 2.0 | 129 | 5  | 1.0 |
|    | YA02-15    | 255  | 92   | 2.76 | 0.04954 | 0.00113 | 0.16739 | 0.00397 | 0.02451 | 0.00034 | 0.00625 | 0.00026 | 0.36 | 173  | 54  | 157 | 3  | 156 | 2.0 | 126 | 5  | 1.0 |
| J4 | 0125-04-7  | 820  | 294  | 2.79 | 0.05350 | 0.00228 | 0.17394 | 0.00719 | 0.02362 | 0.00048 | 0.00218 | 0.00018 | 0.18 | 350  | 99  | 163 | 6  | 150 | 3.0 | 44  | 4  | 0.9 |
|    | 0125-04-20 | 529  | 161  | 3.29 | 0.05043 | 0.00137 | 0.16331 | 0.00453 | 0.02354 | 0.00038 | 0.00250 | 0.00009 | 0.33 | 215  | 64  | 154 | 4  | 150 | 2.0 | 50  | 2  | 1.0 |
|    | 0125-04-3  | 165  | 56   | 2.92 | 0.05157 | 0.00245 | 0.16814 | 0.00774 | 0.02364 | 0.00042 | 0.00679 | 0.00050 | 0.11 | 266  | 111 | 158 | 7  | 151 | 3.0 | 137 | 10 | 1.0 |
|    | 0125-04-5  | 825  | 271  | 3.05 | 0.04844 | 0.00109 | 0.15911 | 0.00374 | 0.02383 | 0.00036 | 0.00310 | 0.00011 | 0.39 | 121  | 54  | 150 | 3  | 152 | 2.0 | 63  | 2  | 1.0 |
|    | 0125-04-6  | 674  | 138  | 4.88 | 0.05342 | 0.00169 | 0.17547 | 0.00557 | 0.02384 | 0.00041 | 0.00276 | 0.00011 | 0.0  |      |     |     |    |     |     |     |    |     |



|    |           |            |      |      |         |         |         |         |         |         |         |         |         |      |     |     |     |     |     |     |     |     |     |
|----|-----------|------------|------|------|---------|---------|---------|---------|---------|---------|---------|---------|---------|------|-----|-----|-----|-----|-----|-----|-----|-----|-----|
| J5 |           | 1112-02-6  | 860  | 229  | 3.76    | 0.04985 | 0.00253 | 0.13791 | 0.00689 | 0.02007 | 0.00031 | 0.00776 | 0.00134 | 0.10 | 188 | 118 | 131 | 6   | 128 | 2.0 | 156 | 27  | 1.0 |
|    |           | 1112-02-10 | 1065 | 243  | 4.39    | 0.04937 | 0.00239 | 0.13896 | 0.00665 | 0.02042 | 0.00032 | 0.00265 | 0.00020 | 0.13 | 165 | 112 | 132 | 6   | 130 | 2.0 | 53  | 4   | 1.0 |
|    |           | 1112-02-5  | 539  | 168  | 3.21    | 0.04880 | 0.00357 | 0.13757 | 0.00988 | 0.02048 | 0.00038 | 0.00695 | 0.00139 | 0.06 | 138 | 165 | 131 | 9   | 131 | 2.0 | 140 | 28  | 1.0 |
|    |           | 1112-02-8  | 1401 | 306  | 4.59    | 0.04881 | 0.00178 | 0.13814 | 0.00500 | 0.02052 | 0.00029 | 0.00445 | 0.00047 | 0.18 | 139 | 85  | 131 | 4   | 131 | 2.0 | 90  | 9   | 1.0 |
|    |           | 1112-02-9  | 854  | 317  | 2.70    | 0.04906 | 0.00205 | 0.13880 | 0.00574 | 0.02053 | 0.00031 | 0.00328 | 0.00029 | 0.15 | 151 | 97  | 132 | 5   | 131 | 2.0 | 66  | 6   | 1.0 |
|    |           | 1112-02-2  | 1295 | 296  | 4.37    | 0.04996 | 0.00202 | 0.14356 | 0.00574 | 0.02085 | 0.00031 | 0.00645 | 0.00091 | 0.16 | 193 | 96  | 136 | 5   | 133 | 2.0 | 130 | 18  | 1.0 |
|    |           | 1112-02-7  | 782  | 197  | 3.98    | 0.04718 | 0.00315 | 0.13588 | 0.00891 | 0.02090 | 0.00037 | 0.00616 | 0.00112 | 0.07 | 58  | 148 | 129 | 8   | 133 | 2.0 | 124 | 22  | 1.0 |
|    |           | 1112-02-11 | 971  | 241  | 4.04    | 0.04889 | 0.00216 | 0.14086 | 0.00614 | 0.02089 | 0.00031 | 0.00324 | 0.00029 | 0.13 | 143 | 102 | 134 | 5   | 133 | 2.0 | 65  | 6   | 1.0 |
|    |           | 1112-02-13 | 891  | 227  | 3.92    | 0.04697 | 0.00260 | 0.13640 | 0.00743 | 0.02108 | 0.00035 | 0.00255 | 0.00021 | 0.10 | 48  | 121 | 130 | 7   | 134 | 2.0 | 51  | 4   | 1.0 |
|    |           | 1112-02-14 | 257  | 77   | 3.35    | 0.04977 | 0.00577 | 0.14377 | 0.01653 | 0.02095 | 0.00042 | 0.00594 | 0.00097 | 0.04 | 184 | 258 | 136 | 15  | 134 | 3.0 | 120 | 19  | 1.0 |
|    |           | 1112-02-3  | 1141 | 272  | 4.20    | 0.04849 | 0.00193 | 0.14113 | 0.00558 | 0.02110 | 0.00031 | 0.00381 | 0.00029 | 0.17 | 123 | 91  | 134 | 5   | 135 | 2.0 | 77  | 6   | 1.0 |
|    |           | 1112-02-12 | 709  | 353  | 2.01    | 0.04800 | 0.00195 | 0.14350 | 0.00575 | 0.02168 | 0.00034 | 0.00245 | 0.00020 | 0.16 | 99  | 92  | 136 | 5   | 138 | 2.0 | 49  | 4   | 1.0 |
|    |           | 1112-02-1  | 920  | 251  | 3.66    | 0.04894 | 0.00357 | 0.14799 | 0.01058 | 0.02194 | 0.00046 | 0.00389 | 0.00048 | 0.08 | 145 | 165 | 140 | 9   | 140 | 3.0 | 78  | 10  | 1.0 |
|    |           | 1112-02-4  | 2032 | 685  | 2.96    | 0.04937 | 0.00115 | 0.14974 | 0.00352 | 0.02199 | 0.00030 | 0.00255 | 0.00014 | 0.31 | 165 | 56  | 142 | 3   | 140 | 2.0 | 51  | 3   | 1.0 |
|    |           | 1112-02-15 | 2801 | 1048 | 2.67    | 0.04701 | 0.00145 | 0.14218 | 0.00437 | 0.02195 | 0.00034 | 0.00217 | 0.00019 | 0.24 | 50  | 68  | 135 | 4   | 140 | 2.0 | 44  | 4   | 1.0 |
| J6 | YA-13-01  | 279        | 97   | 2.88 | 0.05531 | 0.00279 | 0.15071 | 0.00740 | 0.01976 | 0.00036 | 0.00541 | 0.00043 | 0.11    | 425  | 116 | 143 | 7   | 126 | 2.0 | 109 | 9   | 0.9 |     |
|    | YA-13-02  | 981        | 304  | 3.23 | 0.05115 | 0.00151 | 0.14129 | 0.00410 | 0.02003 | 0.00029 | 0.00522 | 0.00038 | 0.21    | 248  | 70  | 134 | 4   | 128 | 2.0 | 105 | 8   | 1.0 |     |
|    | YA-13-03  | 486        | 212  | 2.29 | 0.04976 | 0.00176 | 0.13753 | 0.00477 | 0.02005 | 0.00031 | 0.00507 | 0.00039 | 0.18    | 184  | 84  | 131 | 4   | 128 | 2.0 | 102 | 8   | 1.0 |     |
|    | YA-13-04  | 126        | 60   | 2.11 | 0.05161 | 0.00344 | 0.14294 | 0.00925 | 0.02009 | 0.00042 | 0.00506 | 0.00047 | 0.07    | 268  | 154 | 136 | 8   | 128 | 3.0 | 102 | 9   | 0.9 |     |
|    | YA-13-05  | 180        | 104  | 1.73 | 0.04966 | 0.00229 | 0.13699 | 0.00616 | 0.02001 | 0.00034 | 0.00516 | 0.00044 | 0.12    | 179  | 107 | 130 | 6   | 128 | 2.0 | 104 | 9   | 1.0 |     |
|    | YA-13-06  | 316        | 142  | 2.22 | 0.04908 | 0.00211 | 0.13555 | 0.00567 | 0.02003 | 0.00033 | 0.00466 | 0.00040 | 0.13    | 152  | 100 | 129 | 5   | 128 | 2.0 | 94  | 8   | 1.0 |     |
|    | YA-13-07  | 339        | 182  | 1.86 | 0.04904 | 0.00188 | 0.13605 | 0.00508 | 0.02012 | 0.00032 | 0.00506 | 0.00044 | 0.15    | 150  | 90  | 130 | 5   | 128 | 2.0 | 102 | 9   | 1.0 |     |
|    | YA-13-08  | 210        | 79   | 2.67 | 0.05020 | 0.00373 | 0.13854 | 0.00998 | 0.02002 | 0.00046 | 0.00492 | 0.00048 | 0.06    | 204  | 170 | 132 | 9   | 128 | 3.0 | 99  | 10  | 1.0 |     |
|    | YA-13-09  | 273        | 127  | 2.15 | 0.04751 | 0.00218 | 0.13078 | 0.00584 | 0.01997 | 0.00034 | 0.00449 | 0.00042 | 0.12    | 75   | 102 | 125 | 5   | 127 | 2.0 | 91  | 8   | 1.0 |     |
|    | YA-13-10  | 498        | 160  | 3.11 | 0.04968 | 0.00197 | 0.13668 | 0.00528 | 0.01995 | 0.00032 | 0.00484 | 0.00045 | 0.14    | 180  | 94  | 130 | 5   | 127 | 2.0 | 98  | 9   | 1.0 |     |
|    | YA-13-11  | 253        | 82   | 3.11 | 0.04873 | 0.00254 | 0.13529 | 0.00688 | 0.02013 | 0.00036 | 0.00430 | 0.00023 | 0.10    | 135  | 119 | 129 | 6   | 128 | 2.0 | 87  | 5   | 1.0 |     |
|    | YA-13-12  | 321        | 191  | 1.68 | 0.04868 | 0.00171 | 0.13447 | 0.00463 | 0.02004 | 0.00030 | 0.00454 | 0.00024 | 0.17    | 132  | 82  | 128 | 4   | 128 | 2.0 | 92  | 5   | 1.0 |     |
|    | YA-13-13  | 238        | 84   | 2.83 | 0.06558 | 0.00271 | 0.17736 | 0.00709 | 0.01962 | 0.00034 | 0.00522 | 0.00029 | 0.14    | 793  | 89  | 166 | 6   | 125 | 2.0 | 105 | 6   | 0.8 |     |
|    | YA-13-14  | 116        | 60   | 1.91 | 0.04300 | 0.00433 | 0.11745 | 0.01153 | 0.01981 | 0.00053 | 0.00515 | 0.00047 | 0.04    | -123 | 180 | 113 | 10  | 126 | 3.0 | 104 | 9   | 1.1 |     |
|    | YA-13-15  | 267        | 90   | 2.97 | 0.04786 | 0.00240 | 0.13197 | 0.00647 | 0.02000 | 0.00034 | 0.00471 | 0.00029 | 0.11    | 92   | 112 | 126 | 6   | 128 | 2.0 | 95  | 6   | 1.0 |     |
|    | YA-13-16  | 214        | 93   | 2.30 | 0.04995 | 0.00221 | 0.13843 | 0.00595 | 0.02010 | 0.00034 | 0.00514 | 0.00034 | 0.12    | 193  | 104 | 132 | 5   | 128 | 2.0 | 104 | 7   | 1.0 |     |
|    | YA-13-17  | 451        | 198  | 2.27 | 0.04339 | 0.00204 | 0.11896 | 0.00546 | 0.01988 | 0.00034 | 0.00505 | 0.00035 | 0.12    | -102 | 103 | 114 | 5   | 127 | 2.0 | 102 | 7   | 1.1 |     |
|    | YA-13-18  | 544        | 124  | 4.38 | 0.05802 | 0.00225 | 0.16004 | 0.00603 | 0.02001 | 0.00033 | 0.00564 | 0.00039 | 0.15    | 531  | 87  | 151 | 5   | 128 | 2.0 | 114 | 8   | 0.8 |     |
|    | YA-13-19  | 241        | 109  | 2.20 | 0.05619 | 0.00220 | 0.15220 | 0.00579 | 0.01965 | 0.00032 | 0.00648 | 0.00050 | 0.14    | 460  | 89  | 144 | 5   | 125 | 2.0 | 131 | 10  | 0.9 |     |
|    | YA-13-20  | 276        | 99   | 2.78 | 0.04715 | 0.00240 | 0.12925 | 0.00639 | 0.01988 | 0.00035 | 0.00574 | 0.00048 | 0.09    | 57   | 112 | 123 | 6   | 127 | 2.0 | 116 | 10  | 1.0 |     |
| J7 | YA-04A-12 | 248        | 72   | 3.46 | 0.04741 | 0.00276 | 0.12651 | 0.00731 | 0.01935 | 0.00044 | 0.00545 | 0.00036 | 0.18    | 70   | 129 | 121 | 7   | 124 | 3.0 | 110 | 7   | 1.0 |     |
|    | YA-04A-9  | 229        | 66   | 3.47 | 0.04803 | 0.00397 | 0.13065 | 0.01061 | 0.01973 | 0.00056 | 0.00492 | 0.00041 | 0.12    | 101  | 186 | 125 | 10  | 126 | 4.0 | 99  | 8   | 1.0 |     |
|    | YA-04A-11 | 283        | 59   | 4.79 | 0.04810 | 0.00337 | 0.13343 | 0.00926 | 0.02012 | 0.00050 | 0.00548 | 0.00036 | 0.15    | 104  | 157 | 127 | 8   | 128 | 3.0 | 110 | 7   | 1.0 |     |
|    | YA-04A-1  | 276        | 96   | 2.88 | 0.05037 | 0.00265 | 0.14043 | 0.00729 | 0.02022 | 0.00046 | 0.00596 | 0.00048 | 0.19    | 212  | 122 | 133 | 6   | 129 | 3.0 | 120 | 10  | 1.0 |     |
|    | YA-04A-10 | 1019       | 463  | 2.20 | 0.04863 | 0.00108 | 0.13630 | 0.00331 | 0.02033 | 0.00040 | 0.00313 | 0.00017 | 0.51    | 130  | 53  | 130 | 3   | 130 | 3.0 | 63  | 3   | 1.0 |     |
|    | YA-04A-14 | 259        | 59   | 4.38 | 0.04928 | 0.00414 | 0.14317 | 0.01187 | 0.02107 | 0.00066 | 0.00387 | 0.00030 | 0.15    | 161  | 190 | 136 | 11  | 134 | 4.0 | 78  | 6   | 1.0 |     |
|    | YA-04A-2  | 588        | 232  | 2.54 | 0.04902 | 0.00133 | 0.14306 | 0.00422 | 0.02117 | 0.00046 | 0.00410 | 0.00019 | 0.47    | 149  | 65  | 136 | 4   | 135 | 3.0 | 83  | 4   | 1.0 |     |
|    | YA-04A-8  | 136        | 42   | 3.24 | 0.04944 | 0.00729 | 0.14443 | 0.02065 | 0.02119 | 0.00099 | 0.00257 | 0.00026 | 0.07    | 169  | 296 | 137 | 18  | 135 | 6.0 | 52  | 5   | 1.0 |     |
|    | YA-04A-3  | 516        | 146  | 3.53 | 0.04744 | 0.00191 | 0.13996 | 0.00582 | 0.02140 | 0.00051 | 0.00384 | 0.00020 | 0.34    | 71   | 89  | 133 | 5   | 136 | 3.0 | 77  | 4   | 1.0 |     |
|    | YA-04A-6  | 345        | 98   | 3.50 | 0.04870 | 0.00203 | 0.14321 | 0.00608 | 0.02133 | 0.00048 | 0.00483 | 0.00021 | 0.30    | 133  | 96  | 136 | 5   | 136 | 3.0 | 97  | 4   | 1.0 |     |
|    | YA-04A-15 | 325        | 122  | 2.65 |         |         |         |         |         |         |         |         |         |      |     |     |     |     |     |     |     |     |     |

## M19, Xiamei, Wuyishan (Hu et al., 2011)

|           |     |     |      |         |         |         |         |         |         |         |         |     |    |     |     |     |    |     |
|-----------|-----|-----|------|---------|---------|---------|---------|---------|---------|---------|---------|-----|----|-----|-----|-----|----|-----|
| wys-01-01 | 290 | 234 | 1.20 | 0.04901 | 0.00287 | 0.13426 | 0.00779 | 0.01987 | 0.00036 | 0.00521 | 0.00048 | 128 | 7  | 127 | 2.0 | 105 | 10 | 1.0 |
| wys-01-02 | 242 | 236 | 1.00 | 0.04805 | 0.00277 | 0.13621 | 0.00781 | 0.02056 | 0.00036 | 0.00569 | 0.00053 | 130 | 7  | 131 | 2.0 | 115 | 11 | 1.0 |
| wys-01-04 | 398 | 332 | 1.20 | 0.04930 | 0.00214 | 0.14351 | 0.00622 | 0.02111 | 0.00034 | 0.00640 | 0.00067 | 136 | 6  | 135 | 2.0 | 129 | 13 | 1.0 |
| wys-01-05 | 192 | 174 | 1.10 | 0.04844 | 0.00540 | 0.14179 | 0.01552 | 0.02123 | 0.00056 | 0.00640 | 0.00118 | 135 | 14 | 135 | 4.0 | 129 | 24 | 1.0 |
| wys-01-06 | 172 | 157 | 1.10 | 0.04801 | 0.00659 | 0.13202 | 0.01775 | 0.01995 | 0.00063 | 0.00633 | 0.00136 | 126 | 16 | 127 | 4.0 | 128 | 27 | 1.0 |
| wys-01-08 | 127 | 120 | 1.10 | 0.04895 | 0.00493 | 0.14580 | 0.01449 | 0.02160 | 0.00049 | 0.00677 | 0.00113 | 138 | 13 | 138 | 3.0 | 136 | 23 | 1.0 |
| wys-01-09 | 389 | 350 | 1.10 | 0.04811 | 0.00231 | 0.14005 | 0.00666 | 0.02111 | 0.00037 | 0.00659 | 0.00110 | 133 | 6  | 135 | 2.0 | 133 | 22 | 1.0 |
| wys-01-10 | 139 | 127 | 1.10 | 0.04847 | 0.00587 | 0.14001 | 0.01671 | 0.02095 | 0.00053 | 0.00729 | 0.00169 | 133 | 15 | 134 | 3.0 | 147 | 34 | 1.0 |
| wys-01-11 | 95  | 87  | 1.10 | 0.04899 | 0.00567 | 0.14509 | 0.01665 | 0.02148 | 0.00048 | 0.00677 | 0.00087 | 138 | 15 | 137 | 3.0 | 136 | 17 | 1.0 |
| wys-01-12 | 184 | 178 | 1.00 | 0.04907 | 0.00448 | 0.14551 | 0.01305 | 0.02151 | 0.00051 | 0.00773 | 0.00127 | 138 | 12 | 137 | 3.0 | 156 | 25 | 1.0 |
| wys-01-13 | 337 | 357 | 0.90 | 0.04827 | 0.00223 | 0.12985 | 0.00593 | 0.01951 | 0.00033 | 0.00649 | 0.00085 | 124 | 5  | 125 | 2.0 | 131 | 17 | 1.0 |
| wys-01-14 | 164 | 170 | 1.00 | 0.04904 | 0.00300 | 0.14114 | 0.00858 | 0.02088 | 0.00035 | 0.00666 | 0.00074 | 134 | 8  | 133 | 2.0 | 134 | 15 | 1.0 |
| wys-01-15 | 625 | 863 | 0.70 | 0.04816 | 0.00111 | 0.13184 | 0.00316 | 0.01986 | 0.00028 | 0.00612 | 0.00069 | 126 | 3  | 127 | 2.0 | 123 | 14 | 1.0 |
| wys-01-16 | 172 | 143 | 1.20 | 0.04834 | 0.00542 | 0.14159 | 0.01563 | 0.02125 | 0.00055 | 0.00688 | 0.00127 | 134 | 14 | 136 | 3.0 | 139 | 25 | 1.0 |
| wys-01-17 | 179 | 158 | 1.10 | 0.04886 | 0.00376 | 0.14710 | 0.01121 | 0.02183 | 0.00043 | 0.00719 | 0.00102 | 139 | 10 | 139 | 3.0 | 145 | 20 | 1.0 |
| wys-01-18 | 246 | 165 | 1.50 | 0.04846 | 0.00650 | 0.13341 | 0.01752 | 0.01997 | 0.00063 | 0.00699 | 0.00184 | 127 | 16 | 127 | 4.0 | 141 | 37 | 1.0 |
| wys-01-19 | 260 | 246 | 1.10 | 0.04875 | 0.00276 | 0.13876 | 0.00778 | 0.02065 | 0.00036 | 0.00599 | 0.00086 | 132 | 7  | 132 | 2.0 | 121 | 17 | 1.0 |
|           |     |     |      |         |         |         |         |         |         |         |         |     |    |     |     |     |    |     |
| wys-02-01 | 773 | 307 | 2.50 | 0.04890 | 0.00273 | 0.12371 | 0.00673 | 0.01832 | 0.00037 | 0.00466 | 0.00039 | 118 | 6  | 117 | 2.0 | 94  | 8  | 1.0 |
| wys-02-02 | 257 | 195 | 1.30 | 0.04703 | 0.00274 | 0.11731 | 0.00670 | 0.01811 | 0.00036 | 0.00430 | 0.00030 | 113 | 6  | 116 | 2.0 | 87  | 6  | 1.0 |
| wys-02-04 | 215 | 117 | 1.80 | 0.04774 | 0.00470 | 0.12649 | 0.01211 | 0.01924 | 0.00054 | 0.00460 | 0.00045 | 121 | 11 | 123 | 3.0 | 93  | 9  | 1.0 |
| wys-02-05 | 180 | 114 | 1.60 | 0.04905 | 0.00294 | 0.14233 | 0.00835 | 0.02104 | 0.00040 | 0.00626 | 0.00047 | 135 | 7  | 134 | 3.0 | 126 | 9  | 1.0 |
| wys-02-06 | 317 | 315 | 1.00 | 0.04851 | 0.00244 | 0.13687 | 0.00674 | 0.02049 | 0.00041 | 0.00431 | 0.00037 | 130 | 6  | 131 | 3.0 | 87  | 7  | 1.0 |
| wys-02-08 | 767 | 636 | 1.20 | 0.04825 | 0.00149 | 0.14910 | 0.00456 | 0.02241 | 0.00034 | 0.00612 | 0.00062 | 141 | 4  | 143 | 2.0 | 123 | 42 | 1.0 |
| wys-02-10 | 573 | 152 | 3.80 | 0.04851 | 0.00375 | 0.13020 | 0.00977 | 0.01947 | 0.00046 | 0.00574 | 0.00086 | 124 | 9  | 124 | 3.0 | 116 | 17 | 1.0 |
| wys-02-11 | 314 | 275 | 1.10 | 0.04821 | 0.00222 | 0.14140 | 0.00641 | 0.02128 | 0.00039 | 0.00489 | 0.00036 | 134 | 6  | 136 | 2.0 | 99  | 7  | 1.0 |
| wys-02-13 | 100 | 98  | 1.00 | 0.05002 | 0.00714 | 0.14501 | 0.02010 | 0.02102 | 0.00084 | 0.00247 | 0.00036 | 137 | 18 | 134 | 5.0 | 50  | 7  | 1.0 |
| wys-02-14 | 217 | 141 | 1.50 | 0.04937 | 0.00253 | 0.13218 | 0.00668 | 0.01942 | 0.00034 | 0.00503 | 0.00038 | 126 | 6  | 124 | 2.0 | 101 | 8  | 1.0 |
| wys-02-15 | 288 | 230 | 1.30 | 0.04873 | 0.00178 | 0.13340 | 0.00482 | 0.01986 | 0.00031 | 0.00492 | 0.00039 | 127 | 4  | 127 | 2.0 | 99  | 8  | 1.0 |

## M20, Baiyashan, Tainian (Liu et al., 2016)

|          |      |      |      |         |         |         |         |         |         |         |         |     |     |     |    |     |     |     |     |     |
|----------|------|------|------|---------|---------|---------|---------|---------|---------|---------|---------|-----|-----|-----|----|-----|-----|-----|-----|-----|
| SMS20-01 | 805  | 741  | 1.09 | 0.04755 | 0.00398 | 0.10295 | 0.00852 | 0.01570 | 0.00039 | 0.00298 | 0.00063 | 77  | 188 | 99  | 8  | 100 | 2.0 | 60  | 13  | 1.0 |
| SMS20-02 | 3411 | 1242 | 2.75 | 0.04894 | 0.00147 | 0.10482 | 0.00330 | 0.01553 | 0.00026 | 0.00406 | 0.00072 | 145 | 72  | 101 | 3  | 99  | 2.0 | 82  | 14  | 1.0 |
| SMS20-03 | 3099 | 1247 | 2.49 | 0.04840 | 0.00152 | 0.10267 | 0.00335 | 0.01538 | 0.00026 | 0.00460 | 0.00092 | 119 | 74  | 99  | 3  | 98  | 2.0 | 93  | 19  | 1.0 |
| SMS20-04 | 1175 | 1038 | 1.13 | 0.04852 | 0.00288 | 0.10590 | 0.00625 | 0.01583 | 0.00035 | 0.00248 | 0.00045 | 125 | 134 | 102 | 6  | 101 | 2.0 | 50  | 9   | 1.0 |
| SMS20-05 | 958  | 431  | 2.22 | 0.04953 | 0.00486 | 0.10616 | 0.01024 | 0.01555 | 0.00039 | 0.00534 | 0.00233 | 173 | 223 | 102 | 9  | 99  | 2.0 | 108 | 47  | 1.0 |
| SMS20-06 | 620  | 238  | 2.61 | 0.04956 | 0.00693 | 0.14106 | 0.01939 | 0.02064 | 0.00065 | 0.00943 | 0.00565 | 174 | 286 | 134 | 17 | 132 | 4.0 | 190 | 113 | 1.0 |
| SMS20-07 | 140  | 142  | 0.99 | 0.04769 | 0.01344 | 0.10368 | 0.02896 | 0.01577 | 0.00066 | 0.00454 | 0.00134 | 84  | 469 | 100 | 27 | 101 | 4.0 | 92  | 27  | 1.0 |
| SMS20-08 | 365  | 369  | 0.99 | 0.04754 | 0.00358 | 0.10377 | 0.00780 | 0.01583 | 0.00031 | 0.00440 | 0.00106 | 76  | 168 | 100 | 7  | 101 | 2.0 | 89  | 21  | 1.0 |
| SMS20-09 | 309  | 197  | 1.57 | 0.04866 | 0.00702 | 0.10192 | 0.01460 | 0.01519 | 0.00038 | 0.00517 | 0.00177 | 131 | 289 | 99  | 13 | 97  | 2.0 | 104 | 36  | 1.0 |
| SMS20-10 | 1368 | 643  | 2.13 | 0.04832 | 0.00240 | 0.10510 | 0.00525 | 0.01577 | 0.00028 | 0.00484 | 0.00134 | 115 | 112 | 101 | 5  | 101 | 2.0 | 98  | 27  | 1.0 |
| SMS20-11 | 854  | 479  | 1.78 | 0.04914 | 0.00404 | 0.10743 | 0.00871 | 0.01586 | 0.00036 | 0.00474 | 0.00178 | 155 | 186 | 104 | 8  | 101 | 2.0 | 96  | 36  | 1.0 |

## M21, Jishan and Xiadu villages, Yong'an (Two samples js-jch and js-09 below are cited from Hu et al., 2011, and other four samples from Liu et al., 2016)

|           |     |     |      |         |         |         |         |         |         |         |         |     |    |     |     |     |    |     |
|-----------|-----|-----|------|---------|---------|---------|---------|---------|---------|---------|---------|-----|----|-----|-----|-----|----|-----|
| js-jch-01 | 199 | 79  | 2.50 | 0.04884 | 0.00373 | 0.16601 | 0.01243 | 0.02466 | 0.00060 | 0.00691 | 0.00048 | 156 | 11 | 157 | 4.0 | 139 | 10 | 1.0 |
| js-jch-02 | 515 | 303 | 1.70 | 0.04961 | 0.00220 | 0.14606 | 0.00631 | 0.02136 | 0.00038 | 0.00637 | 0.00060 | 138 | 6  | 136 | 2.0 | 128 | 12 | 1.0 |
| js-jch-04 | 671 | 356 | 1.90 | 0.05032 | 0.00134 | 0.16886 | 0.00451 | 0.02434 | 0.00036 | 0.00703 | 0.00047 | 158 | 4  | 155 | 2.0 | 142 | 9  | 1.0 |
| js-jch-05 | 270 | 259 | 1.00 | 0.04924 | 0.00163 | 0.17688 | 0.00593 | 0.02606 | 0.00045 | 0.00710 | 0.00050 | 165 | 5  | 166 | 3.0 | 143 | 10 | 1.0 |
| js-jch-08 | 245 | 199 | 1.20 | 0.05196 | 0.00186 | 0.18938 | 0.00679 | 0.02643 | 0.00047 | 0.00764 | 0.00065 | 176 | 6  | 168 | 3.0 | 154 | 13 | 1.0 |
| js-jch-09 | 393 | 241 | 1.60 | 0.05174 | 0.00211 | 0.18380 | 0.00751 | 0.02577 | 0.00051 | 0.00602 | 0.00060 | 171 | 6  | 164 | 3.0 | 121 | 12 | 1.0 |
| js-jch-11 | 386 | 405 | 1.00 | 0.04912 | 0.00115 | 0.15937 | 0.00380 | 0.02353 | 0.00034 | 0.00545 | 0.00028 | 150 | 3  | 150 | 2.0 | 110 | 6  | 1.0 |
| js-jch-12 | 669 | 459 | 1.50 | 0.04846 | 0.00123 | 0.13799 | 0.00349 | 0.02066 | 0.00029 | 0.00530 | 0.00032 | 131 | 3  | 132 | 2.0 | 107 | 6  | 1.0 |
| js-jch-13 | 180 | 164 | 1.10 | 0.04997 | 0.00227 | 0.15928 | 0.00705 | 0.02312 | 0.00040 | 0.00666 | 0.00056 | 150 | 6  | 147 | 3.0 | 134 | 11 | 1.0 |
| js-jch-14 | 215 | 162 | 1.30 | 0.04939 | 0.00202 | 0.16990 | 0.00684 | 0.02496 | 0.00041 | 0.00638 | 0.00042 | 159 | 6  | 159 | 3.0 | 129 | 8  | 1.0 |
| js-jch-17 | 125 | 120 | 1.00 | 0.04942 | 0.00302 | 0.15275 | 0.00910 | 0.02244 | 0.00045 | 0.00556 | 0.00048 | 144 | 8  | 143 | 3.0 | 112 | 10 | 1.0 |
| js-jch-18 | 259 | 201 | 1.30 | 0.05015 | 0.00206 | 0.14564 | 0.00584 | 0.02107 | 0.00035 | 0.00511 | 0.00042 | 138 | 5  | 134 | 2.0 | 103 | 8  | 1.0 |
| js-jch-19 | 136 | 154 | 0.90 | 0.05016 | 0.00208 | 0.15968 | 0.00640 | 0.02309 | 0.00037 | 0.00627 | 0.00060 | 150 | 6  | 147 | 2.0 | 126 | 12 | 1.0 |
| js-jch-21 | 296 | 329 | 0.90 | 0.05064 | 0.00158 | 0.15899 | 0.00491 | 0.02278 | 0.00033 | 0.00674 | 0.00053 | 150 | 4  | 145 | 2.0 | 136 | 11 | 1.0 |
| js-jch-22 | 200 | 198 | 1.00 | 0.04839 | 0.00209 | 0.15323 | 0.00655 | 0.02297 | 0.00038 | 0.00660 | 0.00045 | 145 | 6  | 146 | 2.0 | 133 | 9  | 1.0 |
| js-jch-23 | 478 | 314 | 1.50 | 0.05069 | 0.00148 | 0.16087 | 0.00470 | 0.02302 | 0.00034 | 0.00686 | 0.00047 | 151 | 4  | 147 | 2.0 | 138 | 9  | 1.0 |
| js-jch-24 | 223 | 160 | 1.40 | 0.05097 | 0.00237 | 0.16284 | 0.00743 | 0.02318 | 0.00040 | 0.00676 | 0.00053 | 153 | 6  | 148 | 3.0 | 136 | 11 | 1.0 |
| js-jch-25 | 313 | 266 | 1.20 | 0.04942 | 0.00159 | 0.15029 | 0.00482 | 0.02206 | 0.00033 | 0.00646 | 0.00045 | 142 | 4  | 141 | 2.0 | 130 | 9  | 1.0 |
| js-jch-26 | 394 | 357 | 1.10 | 0.04980 | 0.00128 | 0.17051 | 0.00443 | 0.02483 | 0.00035 | 0.00666 | 0.00046 | 160 | 4  | 158 | 2.0 | 134 | 9  | 1.0 |
| js-jch-27 | 77  | 42  | 1.80 | 0.04935 | 0.00618 | 0.16386 | 0.02025 | 0.02408 | 0.00061 | 0.00530 | 0.00045 | 154 | 18 | 153 | 4.0 | 107 | 9  | 1.0 |
| js-jch-28 | 162 | 151 | 1.10 | 0.04967 | 0.00218 | 0.16603 | 0.00722 | 0.02425 | 0.00040 | 0.00643 | 0.00051 | 156 | 6  | 154 | 3.0 | 130 | 10 | 1.0 |
|           |     |     |      |         |         |         |         |         |         |         |         |     |    |     |     |     |    |     |
| js-09-01  | 140 | 96  | 1.50 | 0.04963 | 0.00454 | 0.14027 | 0.01250 | 0.02050 | 0.00051 | 0.00675 | 0.00073 | 133 | 11 | 131 | 3.0 | 136 | 15 | 1.0 |

|          |     |     |      |         |         |         |         |         |         |         |         |      |      |      |     |      |      |      |     |     |
|----------|-----|-----|------|---------|---------|---------|---------|---------|---------|---------|---------|------|------|------|-----|------|------|------|-----|-----|
| js-09-26 | 611 | 310 | 2.00 | 0.04855 | 0.00141 | 0.15238 | 0.00443 | 0.02277 | 0.00033 | 0.00656 | 0.00055 | 144  | 4    | 145  | 2.0 | 132  | 11   | 1.0  |     |     |
| js-09-27 | 185 | 136 | 1.40 | 0.04891 | 0.00268 | 0.14820 | 0.00797 | 0.02198 | 0.00039 | 0.00668 | 0.00071 | 140  | 7    | 140  | 2.0 | 135  | 14   | 1.0  |     |     |
| js-09-29 | 555 | 479 | 1.20 | 0.04944 | 0.00186 | 0.16534 | 0.00614 | 0.02426 | 0.00041 | 0.00691 | 0.00083 | 155  | 5    | 155  | 3.0 | 139  | 17   | 1.0  |     |     |
| js-09-30 | 667 | 438 | 1.50 | 0.04813 | 0.00141 | 0.16529 | 0.00488 | 0.02491 | 0.00038 | 0.00672 | 0.00066 | 155  | 4    | 159  | 2.0 | 135  | 13   | 1.0  |     |     |
| js-09-32 | 440 | 360 | 1.20 | 0.05140 | 0.00194 | 0.15909 | 0.00587 | 0.02245 | 0.00036 | 0.00546 | 0.00042 | 150  | 5    | 143  | 2.0 | 110  | 8    | 1.0  |     |     |
| js-09-33 | 268 | 313 | 0.90 | 0.04819 | 0.00161 | 0.15020 | 0.00497 | 0.02261 | 0.00034 | 0.00605 | 0.00039 | 142  | 4    | 144  | 2.0 | 122  | 8    | 1.0  |     |     |
| js-09-34 | 100 | 119 | 0.80 | 0.04850 | 0.00347 | 0.15102 | 0.01056 | 0.02259 | 0.00049 | 0.00484 | 0.00039 | 143  | 9    | 144  | 3.0 | 98   | 8    | 1.0  |     |     |
| js-09-35 | 588 | 369 | 1.60 | 0.04848 | 0.00146 | 0.14705 | 0.00441 | 0.02200 | 0.00032 | 0.00504 | 0.00030 | 139  | 4    | 140  | 2.0 | 102  | 6    | 1.0  |     |     |
| js-09-36 | 282 | 187 | 1.50 | 0.04847 | 0.00206 | 0.16518 | 0.00689 | 0.02472 | 0.00042 | 0.00582 | 0.00040 | 155  | 6    | 157  | 3.0 | 117  | 8    | 1.0  |     |     |
| js-09-37 | 385 | 276 | 1.40 | 0.04881 | 0.00193 | 0.15992 | 0.00625 | 0.02377 | 0.00039 | 0.00541 | 0.00043 | 151  | 5    | 151  | 2.0 | 109  | 9    | 1.0  |     |     |
| js-09-38 | 290 | 223 | 1.30 | 0.05072 | 0.00200 | 0.15804 | 0.00609 | 0.02260 | 0.00036 | 0.00650 | 0.00061 | 149  | 5    | 144  | 2.0 | 131  | 12   | 1.0  |     |     |
| js-09-39 | 188 | 224 | 0.80 | 0.04860 | 0.00195 | 0.15213 | 0.00602 | 0.02271 | 0.00037 | 0.00570 | 0.00047 | 144  | 5    | 145  | 2.0 | 115  | 9    | 1.0  |     |     |
| js-09-40 | 262 | 255 | 1.00 | 0.04888 | 0.00189 | 0.15126 | 0.00577 | 0.02245 | 0.00036 | 0.00643 | 0.00061 | 143  | 5    | 143  | 2.0 | 130  | 12   | 1.0  |     |     |
| NY36-01  | 909 | 362 | 2.51 | 0.04722 | 0.01626 | 0.13722 | 0.04647 | 0.02110 | 0.00141 | 0.00125 | 0.00071 | 60   | 566  | 131  | 41  | 135  | 9.0  | 25   | 44  | 1.0 |
| NY36-02  | 387 | 211 | 1.84 | 0.04873 | 0.00672 | 0.14353 | 0.01971 | 0.02136 | 0.00048 | 0.00274 | 0.00056 | 135  | 276  | 136  | 18  | 136  | 3.0  | 55   | 11  | 1.0 |
| NY36-03  | 262 | 135 | 1.94 | 0.04915 | 0.02921 | 0.14466 | 0.08524 | 0.02134 | 0.00170 | 0.01357 | 0.03463 | 155  | 967  | 137  | 76  | 136  | 11.0 | 272  | 691 | 1.0 |
| NY36-04  | 240 | 165 | 1.46 | 0.04878 | 0.00956 | 0.14040 | 0.02737 | 0.02087 | 0.00057 | 0.00333 | 0.00120 | 137  | 353  | 133  | 24  | 133  | 4.0  | 67   | 24  | 1.0 |
| NY36-05  | 582 | 284 | 2.05 | 0.05034 | 0.01348 | 0.14730 | 0.03873 | 0.02122 | 0.00124 | 0.00082 | 0.00023 | 211  | 474  | 140  | 34  | 135  | 8.0  | 17   | 5   | 1.0 |
| NY36-06  | 408 | 254 | 1.61 | 0.04662 | 0.01133 | 0.13751 | 0.03302 | 0.02143 | 0.00092 | 0.00152 | 0.00052 | 30   | 401  | 131  | 29  | 137  | 6.0  | 31   | 10  | 1.0 |
| NY36-07  | 560 | 258 | 2.17 | 0.04846 | 0.00756 | 0.14299 | 0.02210 | 0.02139 | 0.00059 | 0.00700 | 0.00451 | 122  | 294  | 136  | 20  | 136  | 4.0  | 141  | 91  | 1.0 |
| NY36-08  | 217 | 154 | 1.41 | 0.04880 | 0.00942 | 0.14159 | 0.02722 | 0.02104 | 0.00055 | 0.00496 | 0.00186 | 138  | 350  | 134  | 24  | 134  | 3.0  | 100  | 37  | 1.0 |
| NY36-09  | 302 | 133 | 2.27 | 0.04926 | 0.01628 | 0.14545 | 0.04772 | 0.02141 | 0.00095 | 0.00610 | 0.00570 | 160  | 563  | 138  | 42  | 137  | 6.0  | 123  | 115 | 1.0 |
| NY36-10  | 354 | 240 | 1.48 | 0.04874 | 0.01061 | 0.14299 | 0.03077 | 0.02126 | 0.00078 | 0.00599 | 0.00593 | 135  | 387  | 136  | 27  | 136  | 5.0  | 121  | 119 | 1.0 |
| NY36-11  | 399 | 700 | 0.57 | 0.11067 | 0.00206 | 4.72312 | 0.10032 | 0.30953 | 0.00481 | 0.04975 | 0.01083 | 1810 | 35   | 1771 | 18  | 1738 | 24.0 | 981  | 209 | 1.0 |
| NY36-12  | 236 | 86  | 2.75 | 0.04819 | 0.01543 | 0.15414 | 0.04918 | 0.02320 | 0.00075 | 0.00560 | 0.00148 | 109  | 537  | 146  | 43  | 148  | 5.0  | 113  | 30  | 1.0 |
| NY36-13  | 211 | 124 | 1.7  | 0.04994 | 0.01746 | 0.14506 | 0.05043 | 0.02106 | 0.00088 | 0.00527 | 0.00274 | 192  | 603  | 138  | 45  | 134  | 6.0  | 106  | 55  | 1.0 |
| NY36-14  | 505 | 305 | 1.65 | 0.04849 | 0.00592 | 0.14290 | 0.01736 | 0.02137 | 0.00049 | 0.00320 | 0.00080 | 123  | 253  | 136  | 15  | 136  | 3.0  | 65   | 16  | 1.0 |
| NY36-15  | 456 | 231 | 1.98 | 0.04880 | 0.00693 | 0.14400 | 0.02037 | 0.02140 | 0.00050 | 0.00655 | 0.00298 | 138  | 285  | 137  | 18  | 136  | 3.0  | 132  | 60  | 1.0 |
| NY36-16  | 243 | 126 | 1.93 | 0.04937 | 0.02744 | 0.14427 | 0.07963 | 0.02119 | 0.00147 | 0.00853 | 0.01765 | 165  | 968  | 137  | 71  | 135  | 9.0  | 172  | 354 | 1.0 |
| NY36-17  | 234 | 121 | 1.93 | 0.04680 | 0.02836 | 0.13779 | 0.08292 | 0.02144 | 0.00160 | 0.00585 | 0.00938 | 39   | 965  | 131  | 74  | 137  | 10.0 | 118  | 188 | 1.0 |
| NY36-18  | 265 | 126 | 2.1  | 0.04882 | 0.02071 | 0.14289 | 0.06022 | 0.02124 | 0.00109 | 0.01354 | 0.02554 | 139  | 726  | 136  | 54  | 135  | 7.0  | 272  | 509 | 1.0 |
| NY36-19  | 486 | 289 | 1.68 | 0.04915 | 0.01231 | 0.14239 | 0.03526 | 0.02101 | 0.00090 | 0.00846 | 0.01569 | 155  | 438  | 135  | 31  | 134  | 6.0  | 170  | 314 | 1.0 |
| NY36-20  | 528 | 364 | 1.45 | 0.04804 | 0.00555 | 0.13934 | 0.01600 | 0.02104 | 0.00049 | 0.00489 | 0.00252 | 101  | 244  | 132  | 14  | 134  | 3.0  | 99   | 51  | 1.0 |
| NY36-21  | 211 | 152 | 1.38 | 0.04836 | 0.02258 | 0.14111 | 0.06532 | 0.02120 | 0.00134 | 0.02619 | 0.16067 | 117  | 810  | 134  | 58  | 135  | 8.0  | 523  | ### | 1.0 |
| NY37-01  | 318 | 112 | 2.83 | 0.04864 | 0.01401 | 0.13954 | 0.04004 | 0.02081 | 0.00068 | 0.00304 | 0.00068 | 131  | 483  | 133  | 36  | 133  | 4.0  | 61   | 14  | 1.0 |
| NY37-02  | 341 | 137 | 2.48 | 0.04881 | 0.01456 | 0.13870 | 0.04116 | 0.02061 | 0.00075 | 0.01815 | 0.02608 | 139  | 503  | 132  | 37  | 132  | 5.0  | 364  | 518 | 1.0 |
| NY37-03  | 206 | 97  | 2.12 | 0.04816 | 0.02600 | 0.13644 | 0.07325 | 0.02055 | 0.00123 | 0.00719 | 0.00573 | 107  | 941  | 130  | 65  | 131  | 8.0  | 145  | 115 | 1.0 |
| NY37-04  | 274 | 117 | 2.33 | 0.04797 | 0.02139 | 0.13836 | 0.06130 | 0.02091 | 0.00113 | 0.00144 | 0.00040 | 98   | 763  | 132  | 55  | 133  | 7.0  | 29   | 8   | 1.0 |
| NY37-05  | 243 | 168 | 1.45 | 0.05077 | 0.02395 | 0.14311 | 0.06694 | 0.02047 | 0.00131 | 0.00484 | 0.00347 | 230  | 844  | 136  | 59  | 131  | 8.0  | 98   | 70  | 1.0 |
| NY37-06  | 622 | 284 | 2.19 | 0.04969 | 0.01243 | 0.14074 | 0.03487 | 0.02056 | 0.00082 | 0.00837 | 0.01011 | 181  | 441  | 134  | 31  | 131  | 5.0  | 168  | 203 | 1.0 |
| NY37-07  | 196 | 93  | 2.1  | 0.04748 | 0.02519 | 0.13429 | 0.07089 | 0.02051 | 0.00119 | 0.00094 | 0.00025 | 73   | 913  | 128  | 63  | 131  | 8.0  | 19   | 5   | 1.0 |
| NY37-08  | 284 | 127 | 2.24 | 0.04896 | 0.01366 | 0.13922 | 0.03866 | 0.02062 | 0.00067 | 0.00322 | 0.00102 | 146  | 475  | 132  | 34  | 132  | 4.0  | 65   | 21  | 1.0 |
| NY37-09  | 152 | 78  | 1.96 | 0.04808 | 0.01950 | 0.13790 | 0.05575 | 0.02080 | 0.00080 | 0.00410 | 0.00128 | 103  | 683  | 131  | 50  | 133  | 5.0  | 83   | 26  | 1.0 |
| NY37-10  | 224 | 104 | 2.16 | 0.04821 | 0.01582 | 0.13797 | 0.04514 | 0.02076 | 0.00068 | 0.00363 | 0.00130 | 110  | 550  | 131  | 40  | 132  | 4.0  | 73   | 26  | 1.0 |
| NY37-11  | 202 | 111 | 1.83 | 0.04930 | 0.01403 | 0.14241 | 0.04038 | 0.02095 | 0.00064 | 0.00344 | 0.00079 | 162  | 486  | 135  | 36  | 134  | 4.0  | 69   | 16  | 1.0 |
| NY37-12  | 358 | 177 | 2.02 | 0.04913 | 0.01650 | 0.14420 | 0.04809 | 0.02129 | 0.00096 | 0.00577 | 0.00403 | 154  | 573  | 137  | 43  | 136  | 6.0  | 116  | 81  | 1.0 |
| NY37-13  | 199 | 84  | 2.36 | 0.04885 | 0.02304 | 0.14011 | 0.06578 | 0.02081 | 0.00102 | 0.00566 | 0.00292 | 141  | 825  | 133  | 59  | 133  | 6.0  | 114  | 59  | 1.0 |
| NY37-14  | 345 | 153 | 2.25 | 0.04882 | 0.01368 | 0.13782 | 0.03841 | 0.02048 | 0.00073 | 0.00208 | 0.00049 | 139  | 475  | 131  | 34  | 131  | 5.0  | 42   | 10  | 1.0 |
| NY37-15  | 284 | 147 | 1.93 | 0.04858 | 0.01161 | 0.13788 | 0.03282 | 0.02059 | 0.00059 | 0.00507 | 0.00210 | 128  | 416  | 131  | 29  | 131  | 4.0  | 102  | 42  | 1.0 |
| NY37-16  | 195 | 82  | 2.37 | 0.04942 | 0.03967 | 0.13799 | 0.11020 | 0.02026 | 0.00170 | #####   | 0.04504 | 168  | 1104 | 131  | 98  | 129  | 11.0 | -385 | 928 | 1.0 |
| NY37-17  | 423 | 190 | 2.23 | 0.04962 | 0.01156 | 0.14146 | 0.03275 | 0.02068 | 0.00068 | 0.00563 | 0.00316 | 177  | 414  | 134  | 29  | 132  | 4.0  | 113  | 64  | 1.0 |
| NY37-18  | 375 | 171 | 2.19 | 0.04859 | 0.01063 | 0.14124 | 0.03073 | 0.02109 | 0.00063 | 0.00622 | 0.00347 | 128  | 385  | 134  | 27  | 135  | 4.0  | 125  | 70  | 1.0 |
| NY37-19  | 365 | 139 | 2.63 | 0.04881 | 0.01223 | 0.14178 | 0.03538 | 0.02107 | 0.00064 | 0.00556 | 0.00251 | 139  | 435  | 135  | 31  | 134  | 4.0  | 112  | 50  | 1.0 |
| NY37-20  | 237 | 129 | 1.84 | 0.04783 | 0.02412 | 0.13487 | 0.06759 | 0.02045 | 0.00120 | #####   | 0.04067 | 91   | 860  | 128  | 60  | 130  | 8.0  | -354 | 837 | 1.0 |
| NY37-21  | 320 | 164 | 1.95 | 0.04859 | 0.00976 | 0.13726 | 0.02746 | 0.02049 | 0.00053 | 0.00633 | 0.00332 | 128  | 358  | 131  | 25  | 131  | 3.0  | 128  | 67  | 1.0 |
| NY37-22  | 369 | 153 | 2.42 | 0.04792 | 0.01592 | 0.13912 | 0.04587 | 0.02105 | 0.00095 | 0.00262 | 0.00121 | 95   | 553  | 132  | 41  | 134  | 6.0  | 53   | 24  | 1.0 |
| NY38-02  | 591 | 293 | 2.02 | 0.04766 | 0.02181 | 0.10350 | 0.04678 | 0.01571 | 0.00118 | 0.00067 | 0.00030 | 71   | 1109 | 95   | 70  | 96   | 9.0  | 13   | 5   | 1.0 |
| NY38-03  | 535 | 114 | 4.7  | 0.04773 | 0.02077 | 0.10155 | 0.04401 | 0.01543 | 0.00067 | 0.00330 | 0.00113 | 131  | 1018 | 99   | 59  | 98   | 6.0  | 103  | 68  | 1.0 |
| NY38-04  | 320 | 130 | 2.46 | 0.04743 | 0.03686 | 0.09851 | 0.07603 | 0.01505 | 0.00141 | 0.00066 | 0.00023 | 99   | 153  | 98   | 6   | 98   | 2.0  | 75   | 31  | 1.0 |
| NY38-05  | 538 | 277 | 1.94 | 0.04892 | 0.00755 | 0.14082 | 0.02161 | 0.02089 | 0.00055 | 0.00292 | 0.00080 | 86   | 739  | 98   | 41  | 99   | 4.0  | 67   | 23  | 1.0 |
| NY38-06  | 379 | 99  | 3.83 | 0.04865 | 0.03026 | 0.10282 | 0.06372 | 0.01535 | 0.00090 | 0.00513 | 0.00340 | 97   | 617  | 99   | 35  | 99   | 4.0  | 59   | 41  | 1.0 |
| NY38-07  | 260 | 87  | 2.97 | 0.04958 | 0.0528  |         |         |         |         |         |         |      |      |      |     |      |      |      |     |     |

|         |      |     |      |         |         |         |         |         |         |         |         |     |      |     |     |     |      |     |    |     |
|---------|------|-----|------|---------|---------|---------|---------|---------|---------|---------|---------|-----|------|-----|-----|-----|------|-----|----|-----|
| NY39-06 | 857  | 456 | 1.88 | 0.04688 | 0.00484 | 0.09772 | 0.01008 | 0.01512 | 0.00030 | 0.00268 | 0.00037 | 43  | 217  | 95  | 9   | 97  | 2.0  | 54  | 7  | 1.0 |
| NY39-07 | 812  | 534 | 1.52 | 0.04643 | 0.00400 | 0.09793 | 0.00845 | 0.01530 | 0.00029 | 0.00301 | 0.00044 | 20  | 190  | 95  | 8   | 98  | 2.0  | 61  | 9  | 1.0 |
| NY39-08 | 74   | 48  | 1.53 | 0.04841 | 0.06353 | 0.09897 | 0.12935 | 0.01482 | 0.00182 | 0.00228 | 0.00082 | 119 | 1452 | 96  | 120 | 95  | 12.0 | 46  | 17 | 1.0 |
| NY39-09 | 493  | 346 | 1.42 | 0.04781 | 0.00848 | 0.10282 | 0.01806 | 0.01560 | 0.00049 | 0.00438 | 0.00156 | 90  | 325  | 99  | 17  | 100 | 3.0  | 88  | 31 | 1.0 |
| NY39-10 | 58   | 559 | 0.1  | 0.05345 | 0.00167 | 0.48948 | 0.01576 | 0.06642 | 0.00110 | 0.01515 | 0.00393 | 348 | 72   | 405 | 11  | 415 | 7.0  | 304 | 78 | 1.0 |
| NY39-11 | 238  | 96  | 2.47 | 0.04801 | 0.01852 | 0.09903 | 0.03806 | 0.01496 | 0.00056 | 0.00416 | 0.00085 | 100 | 646  | 96  | 35  | 96  | 4.0  | 84  | 17 | 1.0 |
| NY39-12 | 1115 | 687 | 1.62 | 0.04781 | 0.00301 | 0.10108 | 0.00638 | 0.01533 | 0.00027 | 0.00415 | 0.00082 | 90  | 140  | 98  | 6   | 98  | 2.0  | 84  | 17 | 1.0 |
| NY39-13 | 1141 | 651 | 1.75 | 0.04791 | 0.00325 | 0.09876 | 0.00671 | 0.01495 | 0.00027 | 0.00377 | 0.00070 | 95  | 152  | 96  | 6   | 96  | 2.0  | 76  | 14 | 1.0 |
| NY39-14 | 807  | 481 | 1.68 | 0.04792 | 0.00464 | 0.10142 | 0.00977 | 0.01535 | 0.00032 | 0.00338 | 0.00069 | 95  | 215  | 98  | 9   | 98  | 2.0  | 68  | 14 | 1.0 |
| NY39-15 | 435  | 220 | 1.98 | 0.04916 | 0.02483 | 0.10578 | 0.05294 | 0.01559 | 0.00112 | 0.00347 | 0.00211 | 155 | 876  | 102 | 49  | 100 | 7.0  | 70  | 43 | 1.0 |
| NY39-16 | 708  | 498 | 1.42 | 0.04744 | 0.00608 | 0.10155 | 0.01288 | 0.01553 | 0.00041 | 0.00444 | 0.00192 | 71  | 256  | 98  | 12  | 99  | 3.0  | 90  | 39 | 1.0 |
| NY39-17 | 160  | 118 | 1.36 | 0.04754 | 0.03360 | 0.10096 | 0.07095 | 0.01541 | 0.00121 | 0.00238 | 0.00104 | 76  | 1051 | 98  | 65  | 99  | 8.0  | 48  | 21 | 1.0 |
| NY39-18 | 309  | 172 | 1.79 | 0.04900 | 0.01320 | 0.10550 | 0.02826 | 0.01562 | 0.00055 | 0.00291 | 0.00070 | 148 | 460  | 102 | 26  | 100 | 3.0  | 59  | 14 | 1.0 |
| NY39-19 | 758  | 294 | 2.58 | 0.04778 | 0.00655 | 0.09904 | 0.01352 | 0.01504 | 0.00034 | 0.00346 | 0.00082 | 88  | 274  | 96  | 12  | 96  | 2.0  | 70  | 17 | 1.0 |
| NY39-20 | 177  | 82  | 2.14 | 0.04794 | 0.02846 | 0.10237 | 0.06052 | 0.01549 | 0.00092 | 0.00142 | 0.00035 | 96  | 974  | 99  | 56  | 99  | 6.0  | 29  | 7  | 1.0 |

M22, Zijinshan and Shanghang, SW Fujian (Jiang et al., 2013, 2015)

|            |                |      |      |         |         |         |         |         |         |      |      |       |     |       |     |     |
|------------|----------------|------|------|---------|---------|---------|---------|---------|---------|------|------|-------|-----|-------|-----|-----|
| ZJ10-7-1   | 101            | 180  | 0.56 | 0.04807 | 0.00107 | 0.11459 | 0.00346 | 0.01714 | 0.00012 | 102  | 67.6 | 109.9 | 2.4 | 109.1 | 0.7 | 1.0 |
| ZJ10-7-2   | 102            | 181  | 0.56 | 0.048   | 0.00106 | 0.11429 | 0.00345 | 0.01712 | 0.00012 | 98.2 | 47.2 | 109.9 | 3.1 | 109.4 | 0.7 | 1.0 |
| ZJ10-7-3   | 77             | 51   | 1.52 | 0.04899 | 0.00099 | 0.13648 | 0.0028  | 0.02026 | 0.00012 | 102  | 49.1 | 110.2 | 3.2 | 109.5 | 0.7 | 1.0 |
| ZJ10-7-4   | 198            | 139  | 1.43 | 0.04839 | 0.00122 | 0.11747 | 0.00308 | 0.01759 | 0.0001  | 98.2 | 25   | 110.5 | 1.9 | 110.4 | 0.8 | 1.0 |
| ZJ10-7-5   | 247            | 416  | 0.59 | 0.04799 | 0.00058 | 0.11499 | 0.00205 | 0.01728 | 0.00012 | 121  | 23.1 | 110.6 | 1.2 | 110.4 | 0.6 | 1.0 |
| ZJ10-7-6   | 151            | 227  | 0.66 | 0.05556 | 0.00081 | 0.55187 | 0.01477 | 0.07155 | 0.00121 | 87.1 | 33.3 | 110.7 | 4.3 | 110.9 | 1.8 | 1.0 |
| ZJ10-7-7   | 144            | 193  | 0.75 | 0.04806 | 0.00072 | 0.1143  | 0.00263 | 0.01707 | 0.0001  | 117  | 59.3 | 112.8 | 2.8 | 112.4 | 0.6 | 1.0 |
| ZJ10-7-8   | 202            | 194  | 1.04 | 0.0484  | 0.00058 | 0.11505 | 0.00135 | 0.01727 | 0.00009 | 146  | 48.1 | 129.9 | 2.5 | 129.3 | 0.8 | 1.0 |
| ZJ10-7-9   | 30             | 85   | 0.36 | 0.05039 | 0.00163 | 0.15833 | 0.00321 | 0.02336 | 0.00019 | 1499 | 859  | 135.2 | 4.6 | 134.1 | 2.2 | 1.0 |
| ZJ10-7-10  | 339            | 497  | 0.68 | 0.04775 | 0.00066 | 0.11516 | 0.0047  | 0.01735 | 0.00029 | 213  | 43.5 | 149.2 | 2.8 | 148.9 | 1.2 | 1.0 |
| ZJ10-7-11  | 357            | 392  | 0.91 | 0.09354 | 0.03857 | 0.14247 | 0.00522 | 0.02101 | 0.00035 | 165  | 25.9 | 160.6 | 3.3 | 159.3 | 1.9 | 1.0 |
| ZJ10-7-12  | 14             | 203  | 0.07 | 0.04936 | 0.00056 | 0.1714  | 0.00375 | 0.02502 | 0.0003  | 309  | 11.1 | 376.4 | 2.3 | 387.4 | 1.9 | 1.0 |
| ZJ10-7-13  | 102            | 76   | 1.36 | 0.07126 | 0.00028 | 1.59523 | 0.01164 | 0.16237 | 0.00101 | 435  | 5.6  | 446.2 | 9.7 | 445.5 | 7.3 | 1.0 |
| ZJ10-7-14  | 228            | 166  | 1.37 | 0.05255 | 0.00026 | 0.44879 | 0.00324 | 0.06193 | 0.00032 | 965  | 2.8  | 968.3 | 4.6 | 969.9 | 5.6 | 1.0 |
|            |                |      |      |         |         |         |         |         |         |      |      |       |     |       |     |     |
| ZJ10-12-1  | 223            | 851  | 0.26 | 0.04781 | 0.00022 | 0.1122  | 0.00117 | 0.01702 | 0.00016 | 100  | 11.1 | 108   | 1.1 | 108.8 | 1.0 | 1.0 |
| ZJ10-12-2  | 305            | 873  | 0.35 | 0.04859 | 0.0009  | 0.11814 | 0.00244 | 0.01764 | 0.00019 | 200  | 9.3  | 110.2 | 0.5 | 109   | 0.4 | 1.0 |
| ZJ10-12-3  | 164            | 774  | 0.21 | 0.04674 | 0.00031 | 0.11009 | 0.00173 | 0.01708 | 0.00023 | 35.3 | 14.8 | 106   | 1.6 | 109.2 | 1.5 | 1.0 |
| ZJ10-12-4  | 572            | 1345 | 0.43 | 0.04821 | 0.00017 | 0.11505 | 0.00093 | 0.01731 | 0.00012 | 109  | 12   | 109.3 | 0.5 | 109.3 | 0.3 | 1.0 |
| ZJ10-12-5  | 252            | 848  | 0.3  | 0.05134 | 0.00019 | 0.17947 | 0.00327 | 0.02532 | 0.0004  | 102  | 61.1 | 109.2 | 2   | 109.5 | 1.8 | 1.0 |
| ZJ10-12-6  | 323            | 1290 | 0.25 | 0.04926 | 0.00033 | 0.11648 | 0.00268 | 0.01715 | 0.00038 | 167  | 14.8 | 111.9 | 2.4 | 109.6 | 2.4 | 1.0 |
| ZJ10-12-7  | 106            | 369  | 0.29 | 0.04717 | 0.00029 | 0.11391 | 0.00114 | 0.01751 | 0.00014 | 200  | 14.8 | 111.6 | 2.9 | 110.3 | 3.0 | 1.0 |
| ZJ10-12-8  | 214            | 574  | 0.37 | 0.0499  | 0.0003  | 0.1186  | 0.00207 | 0.01731 | 0.00037 | 109  | 7.4  | 110.6 | 0.8 | 110.6 | 0.8 | 1.0 |
| ZJ10-12-9  | 287            | 842  | 0.34 | 0.04799 | 0.00029 | 0.11459 | 0.00159 | 0.01731 | 0.0002  | 191  | 17.6 | 113.8 | 1.9 | 110.6 | 2.3 | 1.0 |
| ZJ10-12-10 | 137            | 300  | 0.46 | 0.05536 | 0.00021 | 0.52571 | 0.00568 | 0.06888 | 0.0007  | 98.2 | 19.4 | 110.2 | 1.4 | 110.6 | 1.2 | 1.0 |
| ZJ10-12-11 | 287            | 899  | 0.32 | 0.04879 | 0.00031 | 0.11614 | 0.00323 | 0.01726 | 0.00048 | 55.7 | 42.6 | 108.6 | 3   | 111.3 | 1.5 | 1.0 |
| ZJ10-12-12 | 357            | 1056 | 0.34 | 0.04806 | 0.00066 | 0.1135  | 0.00223 | 0.01714 | 0.00029 | 94.5 | 65.7 | 110.7 | 2   | 111.6 | 1.6 | 1.0 |
| ZJ10-12-13 | 174            | 718  | 0.24 | 0.04699 | 0.00101 | 0.11287 | 0.00334 | 0.01741 | 0.00024 | 57.5 | 14.8 | 109.5 | 1   | 111.9 | 0.9 | 1.0 |
| ZJ10-12-14 | 114            | 448  | 0.25 | 0.04834 | 0.00035 | 0.11952 | 0.00133 | 0.01793 | 0.00014 | 128  | 44.4 | 113.4 | 2.2 | 112.7 | 1.2 | 1.0 |
| ZJ10-12-15 | 520            | 978  | 0.53 | 0.04829 | 0.00017 | 0.11824 | 0.00056 | 0.01776 | 0.00007 | 102  | 4.6  | 112.3 | 0.5 | 112.9 | 0.4 | 1.0 |
| ZJ10-12-16 | 252            | 883  | 0.29 | 0.04791 | 0.00141 | 0.11519 | 0.0022  | 0.01747 | 0.00026 | 122  | 7.4  | 113.5 | 0.5 | 113.5 | 0.4 | 1.0 |
| ZJ10-12-17 | 310            | 1052 | 0.3  | 0.04817 | 0.00016 | 0.1136  | 0.00052 | 0.01711 | 0.00005 | 122  | 16.7 | 114.6 | 1.2 | 114.5 | 0.9 | 1.0 |
| ZJ10-12-18 | 1669           | 1412 | 1.18 | 0.04804 | 0.00018 | 0.11696 | 0.0006  | 0.01766 | 0.00006 | 258  | 4.6  | 167.6 | 2.8 | 161.2 | 2.5 | 1.0 |
| ZJ10-12-19 | 340            | 1120 | 0.3  | 0.04879 | 0.00017 | 0.11467 | 0.00056 | 0.01705 | 0.00006 | 428  | 9.3  | 429   | 3.8 | 429.4 | 4.2 | 1.0 |
|            |                |      |      |         |         |         |         |         |         |      |      |       |     |       |     |     |
| ZJ10-16-1  | 125            | 55   | 2.27 | 0.04793 | 0.00101 | 0.10917 | 0.00299 | 0.01643 | 0.00013 | 94.5 | 45.4 | 105.2 | 2.7 | 105   | 0.8 | 1.0 |
| ZJ10-16-2  | 95             | 34   | 2.8  | 0.10457 | 0.00431 | 0.28912 | 0.01492 | 0.01902 | 0.00021 | 1707 | 75.9 | 257.9 | 12  | 121.5 | 1.4 | 0.5 |
| ZJ10-16-3  | 67             | 36   | 1.89 | 0.04832 | 0.00142 | 0.11082 | 0.00388 | 0.01656 | 0.00014 | 122  | 70.4 | 106.7 | 3.5 | 105.9 | 0.9 | 1.0 |
| ZJ10-16-4  | 94             | 44   | 2.11 | 0.04756 | 0.00142 | 0.11016 | 0.00357 | 0.01684 | 0.00026 | 76   | -127 | 106.1 | 3.3 | 107.7 | 1.6 | 1.0 |
| ZJ10-16-5  | 589            | 320  | 1.84 | 0.04607 | 0.00062 | 0.10932 | 0.00662 | 0.01657 | 0.0004  | 400  | -365 | 105.3 | 6.1 | 105.9 | 2.5 | 1.0 |
| ZJ10-16-6  | 164            | 56   | 2.9  | 0.04851 | 0.00101 | 0.11105 | 0.00231 | 0.01666 | 0.00012 | 124  | 48.1 | 106.9 | 2.1 | 106.5 | 0.8 | 1.0 |
| ZJ10-16-7  | 121            | 106  | 1.14 | 0.04829 | 0.00092 | 0.11317 | 0.0033  | 0.01683 | 0.00014 | 122  | 44.4 | 108.9 | 3   | 107.6 | 0.9 | 1.0 |
| ZJ10-16-8  | 132            | 62   | 2.13 | 0.04844 | 0.0013  | 0.11288 | 0.00372 | 0.01678 | 0.00012 | 121  | 63   | 108.6 | 3.4 | 107.3 | 0.8 | 1.0 |
| ZJ10-16-9  | 534            | 446  | 1.2  | 0.05185 | 0.0048  | 0.11387 | 0.01011 | 0.01642 | 0.0004  | 280  | 215  | 109.5 | 9.2 | 105   | 2.6 | 1.0 |
| ZJ10-16-10 | 129            | 34   | 3.83 | 0.04858 | 0.00104 | 0.10909 | 0.0026  | 0.01628 | 0.00011 | 128  | 50   | 105.1 | 2.4 | 104.1 | 0.7 | 1.0 |
| ZJ10-16-11 | 57             | 27   | 2.13 | 0.04823 | 0.00177 | 0.10813 | 0.0045  | 0.01617 | 0.00012 | 109  | 87   | 104.3 | 4.1 | 103.4 | 0.8 | 1.0 |
| ZJ10-16-12 | 84             | 39   | 2.15 | 0.04853 | 0.00111 | 0.11045 | 0.00273 | 0.01652 | 0.00011 | 124  | 55.6 | 106.4 | 2.5 | 105.6 | 0.7 | 1.0 |
| ZJ10-16-13 | 189            | 78   | 2.43 | 0.05064 | 0.00061 | 0.11351 | 0.00153 | 0.01626 | 0.00009 | 233  | 29.6 | 109.2 | 1.4 | 104   | 0.6 | 1.0 |
| ZJ10-16-14 | 132            | 70   | 1.88 | 0.04843 | 0.00115 | 0.10997 | 0.00389 | 0.01622 | 0.00011 | 121  | 55.6 | 105.9 | 3.6 | 103.7 | 0.7 | 1.0 |
| ZJ10-16-15 | 151            | 116  | 1.3  | 0.04836 | 0.00311 | 0.11207 | 0.00916 | 0.01664 | 0.00033 | 117  | 144  | 107.9 | 8.4 | 106.4 | 2.1 | 1.0 |
| ZJ10-16-16 | 47             | 25   | 1.9  | 0.04878 | 0.00139 | 0.11087 | 0.0043  | 0.01632 | 0.00017 | 200  | 66.7 | 106.8 | 3.9 | 104.3 | 1.1 | 1.0 |
| ZJ10-16-17 | 467            | 513  | 0.91 | 0.04767 | 0.00065 | 0.11062 | 0.00501 | 0.01633 | 0.0003  | 83.4 | 36.1 | 106.5 | 4.6 | 104.4 | 1.9 | 1.0 |
| ZJ10-16-18 | 59             | 42   | 1.39 | 0.04854 | 0.00091 | 0.11151 | 0.00237 | 0.01663 | 0.00012 | 124  | 44.4 | 107.4 | 2.2 | 106.3 | 0.7 | 1.0 |
|            |                |      |      |         |         |         |         |         |         |      |      |       |     |       |     |     |
| ZJ10-21    | Data unavailbe |      |      |         |         |         |         |         |         |      |      |       |     |       |     |     |
|            |                |      |      |         |         |         |         |         |         |      |      |       |     |       |     |     |
| ZJ10-22-1  | 283            | 166  | 1.7  | 0.04815 | 0.00089 | 0.10469 | 0.00238 | 0.01579 | 0.00027 | 189  | 59.2 | 103.3 | 3.2 | 99    | 1.3 | 1.0 |
| ZJ10-22-2  | 578            | 265  | 2.18 | 0.04835 | 0.00104 | 0.10475 | 0.00282 | 0.01563 | 0.00023 | 117  | 50   | 101.2 | 2.6 | 100   | 1.5 | 1.0 |
| ZJ10-22-3  | 430            | 273  | 1.57 | 0.0497  | 0.00124 | 0.10706 | 0.0035  | 0.01547 | 0.00021 | 122  | 15.7 | 100.9 | 2.1 | 100   | 1.4 | 1.0 |
| ZJ10-22-4  | 562            | 572  | 0.98 | 0.04881 | 0.00112 | 0.10763 | 0.00429 | 0.01565 | 0.00022 | 139  | 53.7 | 103.8 | 3.9 | 100.1 | 1.4 | 1.0 |
| ZJ10-22-5  | 354            | 113  | 3.13 | 0.04819 | 0.00103 | 0.10434 | 0.00232 | 0.01575 | 0.00017 | 109  | 54.6 | 100.8 | 2.1 | 100.7 | 1.1 | 1.0 |
| ZJ10-22-6  | 553            | 210  | 2.63 | 0.04828 | 0.00078 | 0.10642 | 0.00192 | 0.01599 | 0.00014 | 106  | 44.4 | 101.1 | 2.2 | 101   | 1.7 | 1.0 |
| ZJ10-22-7  | 161            | 97   | 1.65 | 0.04746 | 0.00212 | 0.10468 | 0.00518 | 0.01592 | 0.00014 | 154  | 36.1 | 105.9 | 4.3 | 101   | 1.1 | 1.0 |
| ZJ10-22-8  | 251            | 123  | 2.03 | 0.04824 | 0.00132 | 0.1066  | 0.003   | 0.01603 | 0.00013 | 117  | 22.2 | 101.9 | 1.4 | 101.1 | 0.7 | 1.0 |
| ZJ10-22-9  | 100            | 87   | 1.15 | 0.04795 | 0.00178 | 0.1065  | 0.00396 | 0.01617 | 0.00021 | 102  | 4.6  | 101.4 | 0.5 | 101.4 | 0.5 | 1.0 |
| ZJ10-22-10 | 275            | 147  | 1.87 | 0.04902 | 0.00173 | 0.10827 | 0.00377 | 0.01605 | 0.00015 | 72.3 | 104  | 101.1 | 4.8 | 101.8 | 0.9 | 1.0 |
| ZJ10-22-11 | 522            | 427  | 1.22 | 0.04809 | 0.00067 | 0.10622 | 0.0015  | 0.01605 | 0.0001  | 76   | 19.4 | 101.7 | 2.4 | 101.9 | 1.5 | 1.0 |
| ZJ10-22-12 | 469            | 212  | 2.21 | 0.0489  | 0.00073 | 0.10819 | 0.00168 | 0.01607 | 0.00012 | 122  | 38.9 | 102.7 | 1.8 | 102.2 | 0.9 | 1.0 |

|            |        |       |      |         |         |         |         |         |         |      |      |       |     |       |      |     |
|------------|--------|-------|------|---------|---------|---------|---------|---------|---------|------|------|-------|-----|-------|------|-----|
| ZJ10-22-13 | 410    | 326   | 1.26 | 0.04802 | 0.00044 | 0.10574 | 0.00115 | 0.016   | 0.00013 | 98.2 | 20.4 | 102.1 | 1.1 | 102.3 | 0.8  | 1.0 |
| ZJ10-22-14 | 369    | 171   | 2.16 | 0.05022 | 0.00086 | 0.1107  | 0.0021  | 0.016   | 0.00017 | 206  | 38.9 | 106.6 | 1.9 | 102.3 | 1.1  | 1.0 |
| ZJ10-22-15 | 2588   | 2091  | 1.24 | 0.04825 | 0.00042 | 0.10446 | 0.00225 | 0.01564 | 0.00021 | 109  | 60.2 | 102.9 | 2.8 | 102.5 | 0.8  | 1.0 |
| ZJ10-22-16 | 1444   | 1244  | 1.16 | 0.0491  | 0.00085 | 0.10996 | 0.00472 | 0.0158  | 0.00017 | 106  | 61.1 | 102.5 | 1.4 | 102.6 | 0.6  | 1.0 |
| ZJ10-22-17 | 575    | 568   | 1.01 | 0.04835 | 0.00045 | 0.10561 | 0.00153 | 0.0158  | 0.00011 | 150  | 81.5 | 104.4 | 3.5 | 102.7 | 1.0  | 1.0 |
| ZJ10-22-18 | 314    | 181   | 1.73 | 0.04939 | 0.00091 | 0.10895 | 0.0019  | 0.01608 | 0.00012 | 143  | 33.3 | 104.3 | 1.5 | 102.7 | 0.7  | 1.0 |
| ZJ10-22-19 | 1415   | 1261  | 1.12 | 0.04754 | 0.00029 | 0.10535 | 0.00258 | 0.01593 | 0.00024 | 165  | 42.6 | 105   | 1.7 | 102.8 | 0.8  | 1.0 |
| ZJ10-22-20 | 1977   | 1524  | 1.3  | 0.04802 | 0.00016 | 0.10498 | 0.00059 | 0.01586 | 0.00008 | 98.2 | 88.9 | 102.8 | 3.6 | 103.4 | 1.3  | 1.0 |
| ZJ10-23-1  | 191    | 459   | 0.42 | 0.04706 | 0.00045 | 0.11098 | 0.00299 | 0.01693 | 0.00021 | 53.8 | 24.1 | 106.9 | 2.7 | 108.2 | 1.3  | 1.0 |
| ZJ10-23-2  | 204    | 552   | 0.37 | 0.04807 | 0.00069 | 0.11431 | 0.00386 | 0.01695 | 0.00019 | 102  | 61.1 | 109.9 | 3.5 | 108.4 | 1.2  | 1.0 |
| ZJ10-23-3  | 214    | 740   | 0.29 | 0.04806 | 0.00046 | 0.11208 | 0.00235 | 0.01679 | 0.00019 | 102  | 22.2 | 107.9 | 2.1 | 107.3 | 1.2  | 1.0 |
| ZJ10-23-4  | 228    | 581   | 0.39 | 0.04755 | 0.00063 | 0.1123  | 0.00387 | 0.01682 | 0.0002  | 76   | 26.9 | 108.1 | 3.5 | 107.6 | 1.3  | 1.0 |
| ZJ10-23-5  | 136    | 409   | 0.33 | 0.04755 | 0.00059 | 0.11092 | 0.00295 | 0.01674 | 0.00018 | 76   | 25   | 106.8 | 2.7 | 107   | 1.1  | 1.0 |
| ZJ10-23-6  | 262    | 502   | 0.52 | 0.04704 | 0.00037 | 0.1099  | 0.002   | 0.01686 | 0.00018 | 50.1 | 23.1 | 105.9 | 1.8 | 107.8 | 1.1  | 1.0 |
| ZJ10-23-7  | 189    | 505   | 0.38 | 0.04796 | 0.00099 | 0.11268 | 0.00334 | 0.0169  | 0.00018 | 98.2 | 45.4 | 108.4 | 3.1 | 108   | 1.2  | 1.0 |
| ZJ10-23-8  | 182    | 528   | 0.34 | 0.04719 | 0.00063 | 0.11081 | 0.00402 | 0.01669 | 0.00023 | 57.5 | 33.3 | 106.7 | 3.7 | 106.7 | 1.5  | 1.0 |
| ZJ10-23-9  | 64     | 269   | 0.24 | 0.04824 | 0.00068 | 0.11133 | 0.00262 | 0.0166  | 0.00013 | 109  | 33.3 | 107.2 | 2.4 | 106.1 | 0.8  | 1.0 |
| ZJ10-23-10 | 259    | 674   | 0.38 | 0.0484  | 0.00122 | 0.11378 | 0.00584 | 0.01658 | 0.00025 | 121  | 59.3 | 109.4 | 5.3 | 106   | 1.6  | 1.0 |
| ZJ10-23-11 | 180    | 609   | 0.3  | 0.04679 | 0.00087 | 0.11053 | 0.00322 | 0.01698 | 0.00018 | 39   | 44.4 | 106.4 | 2.9 | 108.5 | 1.2  | 1.0 |
| ZJ10-23-12 | 362    | 703   | 0.51 | 0.04684 | 0.00054 | 0.11066 | 0.00355 | 0.01688 | 0.00021 | 42.7 | 32.4 | 106.6 | 3.2 | 107.9 | 1.3  | 1.0 |
| ZJ10-23-13 | 111    | 529   | 0.21 | 0.04799 | 0.00065 | 0.11242 | 0.00274 | 0.01684 | 0.00018 | 98.2 | 33.3 | 108.2 | 2.5 | 107.7 | 1.1  | 1.0 |
| ZJ10-23-14 | 126    | 343   | 0.37 | 0.04717 | 0.00092 | 0.11104 | 0.00392 | 0.01682 | 0.00018 | 57.5 | 46.3 | 106.9 | 3.6 | 107.5 | 1.2  | 1.0 |
| ZJ10-23-15 | 231    | 806   | 0.29 | 0.04705 | 0.00038 | 0.11157 | 0.00401 | 0.01694 | 0.00031 | 50.1 | 23.1 | 107.4 | 3.7 | 108.3 | 2.0  | 1.0 |
| ZJ10-23-16 | 262    | 718   | 0.36 | 0.04744 | 0.00071 | 0.11217 | 0.00387 | 0.01686 | 0.00022 | 77.9 | 35.2 | 107.9 | 3.5 | 107.8 | 1.4  | 1.0 |
| ZJ10-23-17 | 177    | 509   | 0.35 | 0.04755 | 0.00055 | 0.1112  | 0.00271 | 0.01681 | 0.00016 | 76   | 25   | 107.1 | 2.5 | 107.4 | 1.0  | 1.0 |
| ZJ10-23-18 | 174    | 850   | 0.21 | 0.04799 | 0.00081 | 0.11253 | 0.00337 | 0.01679 | 0.00021 | 98.2 | 71.3 | 108.3 | 3.1 | 107.3 | 1.3  | 1.0 |
| ZJ10-23-19 | 127    | 396   | 0.32 | 0.0479  | 0.00085 | 0.11313 | 0.00334 | 0.01691 | 0.00018 | 94.5 | 73.1 | 108.8 | 3   | 108.1 | 1.1  | 1.0 |
| ZJ10-23-20 | 175    | 724   | 0.24 | 0.04754 | 0.00056 | 0.11233 | 0.00328 | 0.01693 | 0.00021 | 76   | 25   | 108.1 | 3   | 108.2 | 1.3  | 1.0 |
| SH12-1-1   | 1007.7 | 457.4 | 2.2  | 0.05051 | 0.00073 | 0.10783 | 0.0052  | 0.01553 | 0.00077 | 220  | 33.3 | 104   | 4.8 | 99.4  | 4.9  | 1.0 |
| SH12-1-2   | 1033.3 | 657.8 | 1.57 | 0.05708 | 0.00349 | 0.11957 | 0.0065  | 0.01521 | 0.00025 | 495  | 140  | 114.7 | 5.9 | 97.3  | 1.6  | 0.8 |
| SH12-1-3   | 780.3  | 489.4 | 1.59 | 0.05608 | 0.00548 | 0.11896 | 0.01144 | 0.01539 | 0.00019 | 454  | 212  | 114.1 | 10  | 98.5  | 1.2  | 0.9 |
| SH12-1-4   | 904.7  | 407.9 | 2.22 | 0.0533  | 0.00178 | 0.11461 | 0.00368 | 0.01568 | 0.00079 | 343  | 75.9 | 110.2 | 3.4 | 100.3 | 5.0  | 0.9 |
| SH12-1-5   | 624.3  | 183.1 | 3.41 | 0.05502 | 0.00286 | 0.11657 | 0.00754 | 0.01533 | 0.00041 | 413  | 112  | 112   | 6.9 | 98.1  | 2.6  | 0.9 |
| SH12-1-6   | 399    | 241.7 | 1.65 | 0.05004 | 0.00052 | 0.10584 | 0.00942 | 0.01533 | 0.00128 | 198  | 24.1 | 102.2 | 8.6 | 98.1  | 8.1  | 1.0 |
| SH12-1-7   | 800.6  | 379.7 | 2.11 | 0.05166 | 0.00079 | 0.10993 | 0.00254 | 0.01541 | 0.00022 | 333  | 35.2 | 105.9 | 2.3 | 98.6  | 1.4  | 0.9 |
| SH12-1-8   | 471.6  | 96.5  | 4.89 | 0.09731 | 0.00362 | 0.2112  | 0.00991 | 0.01557 | 0.00021 | 1573 | 70.4 | 194.6 | 8.3 | 99.6  | 1.3  | 0.5 |
| SH12-1-9   | 742.5  | 262.4 | 2.83 | 0.08482 | 0.00163 | 0.18159 | 0.00429 | 0.01546 | 0.00013 | 1322 | 38.1 | 169.4 | 3.7 | 98.9  | 0.8  | 0.6 |
| SH12-1-10  | 205.4  | 79.6  | 2.58 | 0.0877  | 0.00751 | 0.18762 | 0.01865 | 0.01543 | 0.00027 | 1376 | 133  | 174.6 | 16  | 98.7  | 1.7  | 0.6 |
| SH12-1-11  | 253.8  | 88.4  | 2.87 | 0.08067 | 0.00675 | 0.1675  | 0.01349 | 0.01518 | 0.00036 | 1213 | 165  | 157.2 | 12  | 97.1  | 2.3  | 0.6 |
| SH12-1-12  | 402.9  | 114.8 | 3.51 | 0.0568  | 0.00411 | 0.12106 | 0.01052 | 0.01534 | 0.00029 | 483  | 159  | 116   | 9.5 | 98.2  | 1.8  | 0.8 |
| SH12-1-13  | 1359.7 | 376.9 | 3.61 | 0.05021 | 0.00051 | 0.10558 | 0.00121 | 0.01527 | 0.00012 | 206  | 19.4 | 101.9 | 1.1 | 97.7  | 0.8  | 1.0 |
| SH12-1-14  | 288.6  | 197.5 | 1.46 | 0.06397 | 0.00356 | 0.14069 | 0.00098 | 0.01599 | 0.00081 | 740  | 118  | 133.7 | 0.9 | 102.3 | 5.1  | 0.8 |
| SH12-1-15  | 521.9  | 353.8 | 1.47 | 0.05631 | 0.00103 | 0.11989 | 0.00237 | 0.01545 | 0.00015 | 465  | 36.1 | 115   | 2.1 | 98.8  | 1.0  | 0.9 |
| SH12-1-16  | 406.1  | 191   | 2.13 | 0.06934 | 0.00258 | 0.15053 | 0.00589 | 0.01575 | 0.00021 | 909  | 75.9 | 142.4 | 5.2 | 100.7 | 1.3  | 0.7 |
| SH12-1-17  | 274.7  | 77.6  | 3.54 | 0.06239 | 0.00223 | 0.13359 | 0.00497 | 0.01553 | 0.00019 | 687  | 75.9 | 127.3 | 4.4 | 99.4  | 1.2  | 0.8 |
| SH12-1-18  | 451.7  | 215   | 2.1  | 0.07435 | 0.00517 | 0.16004 | 0.01274 | 0.01556 | 0.00022 | 1051 | 141  | 150.7 | 11  | 99.5  | 1.4  | 0.7 |
| SH12-1-19  | 1544.7 | 664.3 | 2.33 | 0.05327 | 0.00073 | 0.1139  | 0.00186 | 0.01551 | 0.00015 | 339  | 31.5 | 109.5 | 1.7 | 99.2  | 1.0  | 0.9 |
| SH12-2-1   | 187.5  | 109.3 | 1.72 | 0.16901 | 0.00351 | 0.43058 | 0.0102  | 0.01847 | 0.00017 | 2548 | 35.3 | 363.6 | 7.2 | 118   | 1.1  | 0.3 |
| SH12-2-2   | 491.1  | 428.7 | 1.15 | 0.08067 | 0.00233 | 0.18105 | 0.00743 | 0.01627 | 0.00029 | 1213 | 57.1 | 169   | 6.4 | 104   | 1.9  | 0.6 |
| SH12-2-3   | 241.3  | 82.5  | 2.93 | 0.21501 | 0.00642 | 0.54028 | 0.0246  | 0.01817 | 0.00037 | 2944 | 48.2 | 438.6 | 16  | 116.1 | 2.4  | 0.3 |
| SH12-2-4   | 195.5  | 110.3 | 1.77 | 0.10476 | 0.00327 | 0.22651 | 0.0082  | 0.01567 | 0.00017 | 1710 | 57.4 | 207.3 | 6.8 | 100.2 | 1.1  | 0.5 |
| SH12-2-5   | 165.9  | 62.3  | 2.66 | 0.08257 | 0.00369 | 0.18167 | 0.00946 | 0.01591 | 0.00027 | 1259 | 87.8 | 169.5 | 8.1 | 101.8 | 1.7  | 0.6 |
| SH12-2-6   | 131.8  | 59.9  | 2.2  | 0.16565 | 0.01594 | 0.42656 | 0.07402 | 0.01816 | 0.0016  | 2514 | 196  | 360.7 | 53  | 116   | 10.2 | 0.3 |
| SH12-2-7   | 298    | 194.1 | 1.54 | 0.06083 | 0.00446 | 0.1329  | 0.01156 | 0.0158  | 0.00053 | 632  | 153  | 126.7 | 10  | 101.1 | 3.3  | 0.8 |
| SH12-2-8   | 635.4  | 191.5 | 3.32 | 0.06342 | 0.00295 | 0.13898 | 0.00714 | 0.01594 | 0.00035 | 724  | 98.9 | 132.1 | 6.4 | 101.9 | 2.2  | 0.8 |
| SH12-2-9   | 1555.3 | 703.9 | 2.21 | 0.05299 | 0.0017  | 0.11455 | 0.006   | 0.01568 | 0.00068 | 328  | 72.2 | 110.1 | 5.5 | 100.3 | 4.3  | 0.9 |
| SH12-2-10  | 400.1  | 89.8  | 4.46 | 0.05647 | 0.00359 | 0.12319 | 0.0104  | 0.01577 | 0.00067 | 472  | 141  | 118   | 9.4 | 100.9 | 4.3  | 0.9 |
| SH12-2-11  | 2019.7 | 796.7 | 2.54 | 0.05305 | 0.00104 | 0.11725 | 0.00185 | 0.01604 | 0.00016 | 332  | 44.4 | 112.6 | 1.7 | 102.6 | 1.0  | 0.9 |
| SH12-2-12  | 1095.5 | 627.2 | 1.75 | 0.04992 | 0.00032 | 0.10673 | 0.0011  | 0.0155  | 0.00013 | 191  | 14.8 | 103   | 1   | 99.2  | 0.8  | 1.0 |
| SH12-2-13  | 555.6  | 259.5 | 2.14 | 0.05122 | 0.00073 | 0.11036 | 0.00181 | 0.01562 | 0.00014 | 250  | 33.3 | 106.3 | 1.7 | 99.9  | 0.9  | 0.9 |
| SH12-2-14  | 266.4  | 115.3 | 2.31 | 0.10059 | 0.00493 | 0.21927 | 0.01128 | 0.01582 | 0.00035 | 1635 | 90.7 | 201.3 | 9.4 | 101.2 | 2.2  | 0.5 |
| SH12-2-15  | 598.2  | 322.6 | 1.85 | 0.05154 | 0.00052 | 0.11222 | 0.00164 | 0.0158  | 0.00018 | 265  | 22.2 | 108   | 1.5 | 101   | 1.1  | 0.9 |
| SH12-2-16  | 364.9  | 189.4 | 1.93 | 0.05204 | 0.00116 | 0.11069 | 0.00232 | 0.01549 | 0.00022 | 287  | 54.6 | 106.6 | 2.1 | 99.1  | 1.4  | 0.9 |
| SH12-2-17  | 130.5  | 63.6  | 2.05 | 0.10097 | 0.00614 | 0.26023 | 0.02029 | 0.01834 | 0.00031 | 1643 | 113  | 234.9 | 16  | 117.2 | 1.9  | 0.5 |
| SH12-2-18  | 253.7  | 124.9 | 2.03 | 0.13428 | 0.00601 | 0.33101 | 0.01838 | 0.0177  | 0.00024 | 2155 | 77.8 | 290.3 | 14  | 113.1 | 1.5  | 0.4 |
| SH12-2-19  | 526.5  | 385.1 | 1.37 | 0.07955 | 0.01129 | 0.18566 | 0.03456 | 0.01682 | 0.00077 | 1187 | 284  | 172.9 | 30  | 107.5 | 4.9  | 0.6 |
| SH12-2-20  | 137.2  | 91.1  | 1.51 | 0.20164 | 0.00622 | 0.5499  | 0.02017 | 0.0197  | 0.00021 | 2840 | 55.7 | 444.9 | 13  | 125.8 | 1.3  | 0.3 |
| SH12-3-1   | 519.3  | 295.1 | 1.76 | 0.06694 | 0.00246 | 0.14795 | 0.00594 | 0.01608 | 0.0006  | 835  | 72.1 | 140.1 | 5.3 | 102.8 | 3.8  | 0.7 |
| SH12-3-2   | 316.8  | 277.9 | 1.14 | 0.05996 | 0.00145 | 0.13301 | 0.00345 | 0.0161  | 0.00019 | 611  | 51.8 | 126.8 | 3.1 | 103   | 1.2  | 0.8 |
| SH12-3-3   | 264.5  | 278.9 | 0.95 | 0.06877 | 0.0025  | 0.15334 | 0.00588 | 0.01617 | 0.00018 | 900  | 75.2 | 144.9 | 5.2 | 103.4 | 1.1  | 0.7 |
| SH12-3-4   | 189.1  | 250.6 | 0.75 | 0.098   | 0.00472 |         |         |         |         |      |      |       |     |       |      |     |

|           |        |       |      |         |         |         |         |         |         |      |      |       |     |       |      |     |
|-----------|--------|-------|------|---------|---------|---------|---------|---------|---------|------|------|-------|-----|-------|------|-----|
| SH12-3-15 | 317.9  | 270.3 | 1.18 | 0.0565  | 0.00094 | 0.12259 | 0.00265 | 0.01574 | 0.00024 | 472  | 37   | 117.4 | 2.4 | 100.7 | 1.5  | 0.9 |
| SH12-3-16 | 1333.8 | 631.3 | 2.11 | 0.06613 | 0.00163 | 0.14675 | 0.00644 | 0.01604 | 0.00047 | 809  | 47.2 | 139   | 5.7 | 102.5 | 3.0  | 0.7 |
| SH12-3-17 | 129.5  | 191.1 | 0.68 | 0.19495 | 0.00754 | 0.47497 | 0.02172 | 0.01764 | 0.00028 | 2784 | 63.6 | 394.6 | 15  | 112.7 | 1.8  | 0.3 |
| SH12-3-18 | 210    | 238.8 | 0.88 | 0.05782 | 0.00125 | 0.1253  | 0.00334 | 0.01568 | 0.00016 | 524  | 46.3 | 119.9 | 3   | 100.3 | 1.0  | 0.8 |
| SH12-3-19 | 272.8  | 311.8 | 0.87 | 0.07955 | 0.0017  | 0.17852 | 0.00418 | 0.01625 | 0.0001  | 1187 | 42.6 | 166.8 | 3.6 | 103.9 | 0.7  | 0.6 |
| SH12-4-1  | 339.7  | 300.5 | 1.13 | 0.06014 | 0.00097 | 0.12988 | 0.00219 | 0.01567 | 0.00011 | 609  | 35.2 | 124   | 2   | 100.2 | 0.7  | 0.8 |
| SH12-4-2  | 188.4  | 359.2 | 0.52 | 0.05236 | 0.00064 | 0.11619 | 0.00156 | 0.01611 | 0.00016 | 302  | 27.8 | 111.6 | 1.4 | 103   | 1.0  | 0.9 |
| SH12-4-3  | 176.8  | 146.1 | 1.21 | 0.07544 | 0.00312 | 0.16689 | 0.0077  | 0.01599 | 0.00016 | 1080 | 83.3 | 156.7 | 6.7 | 102.3 | 1.0  | 0.7 |
| SH12-4-4  | 172.5  | 184.7 | 0.93 | 0.08065 | 0.00261 | 0.18363 | 0.0062  | 0.01651 | 0.0002  | 1213 | 64   | 171.2 | 5.3 | 105.6 | 1.3  | 0.6 |
| SH12-4-5  | 276.9  | 252.5 | 1.1  | 0.07009 | 0.00159 | 0.15724 | 0.00361 | 0.01627 | 0.00011 | 932  | 46.3 | 148.3 | 3.2 | 104.1 | 0.7  | 0.7 |
| SH12-4-6  | 396.5  | 246.5 | 1.61 | 0.07218 | 0.00212 | 0.16026 | 0.00523 | 0.01609 | 0.00017 | 991  | 59.3 | 150.9 | 4.6 | 102.9 | 1.1  | 0.7 |
| SH12-4-7  | 315.1  | 129.8 | 2.43 | 0.11747 | 0.00901 | 0.27417 | 0.03135 | 0.01622 | 0.00032 | 1918 | 138  | 246   | 25  | 103.7 | 2.0  | 0.4 |
| SH12-4-8  | 317    | 246.5 | 1.29 | 0.05785 | 0.0016  | 0.12655 | 0.00526 | 0.01586 | 0.00049 | 524  | 61.1 | 121   | 4.7 | 101.4 | 3.1  | 0.8 |
| SH12-4-9  | 439.6  | 296.4 | 1.48 | 0.05186 | 0.00114 | 0.11485 | 0.00333 | 0.01609 | 0.00037 | 280  | 50   | 110.4 | 3   | 102.9 | 2.3  | 0.9 |
| SH12-4-10 | 693.9  | 387   | 1.79 | 0.05153 | 0.00093 | 0.11207 | 0.0035  | 0.01577 | 0.0004  | 265  | 36.1 | 107.9 | 3.2 | 100.8 | 2.5  | 0.9 |
| SH12-4-11 | 131.3  | 136.8 | 0.96 | 0.05435 | 0.00143 | 0.11979 | 0.00535 | 0.01618 | 0.00077 | 387  | 59.3 | 114.9 | 4.8 | 103.5 | 4.9  | 0.9 |
| SH12-4-12 | 240.7  | 312.5 | 0.77 | 0.05135 | 0.00115 | 0.11381 | 0.00622 | 0.01616 | 0.00089 | 258  | 47.2 | 109.4 | 5.7 | 103.3 | 5.7  | 0.9 |
| SH12-4-13 | 75.6   | 70    | 1.08 | 0.0742  | 0.00047 | 1.36888 | 0.03125 | 0.13384 | 0.00297 | 1056 | 13   | 875.7 | 13  | 809.7 | 16.9 | 0.9 |
| SH12-4-14 | 161.3  | 168.9 | 0.95 | 0.14589 | 0.02966 | 0.4323  | 0.11304 | 0.02025 | 0.0014  | 2299 | 357  | 364.8 | 80  | 129.2 | 8.8  | 0.4 |
| SH12-4-15 | 173    | 438.8 | 0.39 | 0.05285 | 0.0007  | 0.1181  | 0.00272 | 0.01621 | 0.00032 | 324  | 26.9 | 113.4 | 2.5 | 103.7 | 2.0  | 0.9 |
| SH12-4-16 | 622    | 352.5 | 1.76 | 0.05849 | 0.00129 | 0.12962 | 0.00407 | 0.01613 | 0.00046 | 550  | 48.1 | 123.8 | 3.7 | 103.2 | 2.9  | 0.8 |
| SH12-4-17 | 489.8  | 355.7 | 1.38 | 0.05236 | 0.00078 | 0.11536 | 0.00291 | 0.01599 | 0.00035 | 302  | 39.8 | 110.9 | 2.7 | 102.3 | 2.2  | 0.9 |
| SH12-4-18 | 183.3  | 200.2 | 0.92 | 0.06601 | 0.00187 | 0.14896 | 0.00666 | 0.01635 | 0.00052 | 806  | 59.3 | 141   | 5.9 | 104.5 | 3.3  | 0.7 |
| SH12-4-19 | 155.8  | 145.4 | 1.07 | 0.06529 | 0.0047  | 0.14653 | 0.01008 | 0.01633 | 0.00037 | 783  | 147  | 138.8 | 8.9 | 104.4 | 2.4  | 0.8 |
| SH12-4-20 | 393.8  | 371.8 | 1.06 | 0.05047 | 0.0015  | 0.10877 | 0.00244 | 0.01567 | 0.00018 | 217  | 68.5 | 104.8 | 2.2 | 100.2 | 1.1  | 1.0 |
| SH12-6-1  | 418.4  | 297.9 | 1.4  | 0.04934 | 0.00337 | 0.10431 | 0.00964 | 0.01541 | 0.00131 | 165  | 152  | 100.7 | 8.9 | 98.6  | 8.3  | 1.0 |
| SH12-6-2  | 151.7  | 122.1 | 1.24 | 0.08018 | 0.00344 | 0.18206 | 0.00918 | 0.01643 | 0.00027 | 1267 | 84.4 | 169.8 | 7.9 | 105   | 1.7  | 0.6 |
| SH12-6-3  | 193.2  | 203.8 | 0.95 | 0.05053 | 0.00107 | 0.11129 | 0.00286 | 0.01596 | 0.00025 | 220  | 82.4 | 107.1 | 2.6 | 102.1 | 1.6  | 1.0 |
| SH12-6-4  | 332.3  | 206.4 | 1.61 | 0.05125 | 0.00082 | 0.1115  | 0.00257 | 0.01582 | 0.00034 | 250  | 37   | 107.3 | 2.4 | 101.2 | 2.1  | 0.9 |
| SH12-6-5  | 627.4  | 396.9 | 1.58 | 0.05045 | 0.00067 | 0.11503 | 0.00242 | 0.01657 | 0.00033 | 217  | 36.1 | 110.6 | 2.2 | 106   | 2.1  | 1.0 |
| SH12-6-6  | 624.4  | 439.6 | 1.42 | 0.05328 | 0.00141 | 0.11545 | 0.00955 | 0.01579 | 0.00147 | 343  | 59.3 | 110.9 | 8.7 | 101   | 9.3  | 0.9 |
| SH12-6-7  | 270.5  | 281.3 | 0.96 | 0.05552 | 0.00097 | 0.12636 | 0.00278 | 0.01657 | 0.00032 | 432  | 38.9 | 120.8 | 2.5 | 105.9 | 2.0  | 0.9 |
| SH12-6-8  | 304.8  | 277.1 | 1.1  | 0.0627  | 0.00689 | 0.13951 | 0.01672 | 0.01611 | 0.00081 | 698  | 231  | 132.6 | 15  | 103   | 5.1  | 0.8 |
| SH12-6-9  | 880.2  | 449.9 | 1.96 | 0.04845 | 0.00046 | 0.10594 | 0.00619 | 0.01584 | 0.00088 | 121  | 22.2 | 102.2 | 5.7 | 101.3 | 5.6  | 1.0 |
| SH12-6-10 | 314.8  | 199.2 | 1.58 | 0.05048 | 0.0017  | 0.10741 | 0.00365 | 0.01555 | 0.00044 | 217  | 47.2 | 103.6 | 3.3 | 99.5  | 2.8  | 1.0 |
| SH12-6-11 | 386    | 310.5 | 1.24 | 0.05038 | 0.00149 | 0.10869 | 0.00637 | 0.01573 | 0.00089 | 213  | 68.5 | 104.8 | 5.8 | 100.6 | 5.7  | 1.0 |
| SH12-6-12 | 204.9  | 201.4 | 1.02 | 0.07517 | 0.00569 | 0.17704 | 0.01659 | 0.01668 | 0.00038 | 1073 | 148  | 165.5 | 14  | 106.7 | 2.4  | 0.6 |
| SH12-6-13 | 130.7  | 125.1 | 1.04 | 0.05179 | 0.00128 | 0.11346 | 0.00544 | 0.01578 | 0.00057 | 276  | 57.4 | 109.1 | 5   | 100.9 | 3.6  | 0.9 |
| SH12-6-14 | 220    | 209.2 | 1.05 | 0.08418 | 0.00396 | 0.19971 | 0.01341 | 0.01706 | 0.00043 | 1298 | 60.2 | 184.9 | 11  | 109   | 2.7  | 0.6 |
| SH12-6-15 | 486.7  | 338.2 | 1.44 | 0.05176 | 0.00069 | 0.1117  | 0.00209 | 0.01564 | 0.0002  | 276  | 31.5 | 107.5 | 1.9 | 100.1 | 1.2  | 0.9 |
| SH12-6-16 | 1752.6 | 574.8 | 3.05 | 0.05117 | 0.00067 | 0.11172 | 0.00199 | 0.01584 | 0.00022 | 256  | 31.5 | 107.5 | 1.8 | 101.3 | 1.4  | 0.9 |
| SH12-6-17 | 413.3  | 272.7 | 1.52 | 0.05222 | 0.00087 | 0.11264 | 0.00231 | 0.01565 | 0.00023 | 295  | 37   | 108.4 | 2.1 | 100.1 | 1.4  | 0.9 |
| SH12-6-18 | 125.2  | 114.9 | 1.09 | 0.05095 | 0.00314 | 0.11205 | 0.00601 | 0.01599 | 0.00025 | 239  | 138  | 107.8 | 5.5 | 102.3 | 1.6  | 0.9 |
| SH12-6-19 | 796.8  | 386.8 | 2.06 | 0.05234 | 0.00052 | 0.11485 | 0.00137 | 0.01592 | 0.00013 | 302  | 24.1 | 110.4 | 1.2 | 101.8 | 0.8  | 0.9 |
| SH12-6-20 | 574.2  | 360.7 | 1.59 | 0.04969 | 0.00063 | 0.10876 | 0.00324 | 0.01586 | 0.0004  | 189  | 29.6 | 104.8 | 3   | 101.4 | 2.6  | 1.0 |
| SH12-7-1  | 214.2  | 306.8 | 0.7  | 0.05174 | 0.00078 | 0.11625 | 0.00372 | 0.01626 | 0.00041 | 272  | 35.2 | 111.7 | 3.4 | 104   | 2.6  | 0.9 |
| SH12-7-2  | 136.1  | 204.8 | 0.66 | 0.04985 | 0.00068 | 0.11056 | 0.00234 | 0.01607 | 0.00025 | 187  | 26.8 | 106.5 | 2.1 | 102.8 | 1.6  | 1.0 |
| SH12-7-3  | 105.8  | 286.4 | 0.37 | 0.06223 | 0.00176 | 0.1504  | 0.00596 | 0.01767 | 0.00066 | 683  | 61.1 | 142.3 | 5.3 | 112.9 | 4.2  | 0.8 |
| SH12-7-4  | 155    | 423.5 | 0.37 | 0.0505  | 0.00065 | 0.11418 | 0.0031  | 0.01638 | 0.00039 | 217  | 34.3 | 109.8 | 2.8 | 104.8 | 2.5  | 1.0 |
| SH12-7-5  | 202.1  | 278.5 | 0.73 | 0.05075 | 0.00067 | 0.11484 | 0.00268 | 0.01644 | 0.00033 | 228  | 31.5 | 110.4 | 2.4 | 105.1 | 2.1  | 1.0 |
| SH12-7-6  | 288.8  | 412.5 | 0.7  | 0.05047 | 0.00179 | 0.11309 | 0.0099  | 0.01616 | 0.00084 | 217  | 83.3 | 108.8 | 9   | 103.4 | 5.3  | 1.0 |
| SH12-7-7  | 283    | 804.3 | 0.35 | 0.05073 | 0.00056 | 0.11673 | 0.00265 | 0.01674 | 0.0004  | 228  | 21.3 | 112.1 | 2.4 | 107   | 2.5  | 1.0 |
| SH12-7-8  | 251.2  | 303.8 | 0.83 | 0.05054 | 0.00364 | 0.11068 | 0.01108 | 0.01611 | 0.00229 | 220  | 173  | 106.6 | 10  | 103   | 14.6 | 1.0 |
| SH12-7-9  | 183.1  | 348.7 | 0.53 | 0.0505  | 0.00064 | 0.11511 | 0.00229 | 0.01651 | 0.00022 | 217  | 34.3 | 110.6 | 2.1 | 105.6 | 1.4  | 1.0 |
| SH12-7-10 | 185.2  | 262.1 | 0.71 | 0.05146 | 0.00053 | 0.11574 | 0.00126 | 0.01633 | 0.00011 | 261  | 22.2 | 111.2 | 1.1 | 104.4 | 0.7  | 0.9 |
| SH12-7-11 | 192.7  | 401.7 | 0.48 | 0.05091 | 0.00056 | 0.11435 | 0.00203 | 0.0163  | 0.00025 | 235  | 24.1 | 109.9 | 1.8 | 104.3 | 1.6  | 0.9 |
| SH12-7-12 | 182.7  | 281.1 | 0.65 | 0.05022 | 0.00064 | 0.11164 | 0.00239 | 0.0161  | 0.00025 | 206  | 29.6 | 107.5 | 2.2 | 103   | 1.6  | 1.0 |
| SH12-7-13 | 181    | 273.3 | 0.66 | 0.05076 | 0.00081 | 0.11256 | 0.00231 | 0.0161  | 0.00023 | 232  | 35.2 | 108.3 | 2.1 | 103   | 1.5  | 1.0 |
| SH12-7-14 | 306.9  | 320   | 0.96 | 0.05167 | 0.00107 | 0.11789 | 0.00479 | 0.01654 | 0.00051 | 333  | 41.7 | 113.2 | 4.4 | 105.7 | 3.2  | 0.9 |
| SH12-7-15 | 309.5  | 432.9 | 0.71 | 0.05195 | 0.00084 | 0.11668 | 0.00301 | 0.01623 | 0.0002  | 283  | 32.4 | 112.1 | 2.7 | 103.8 | 1.3  | 0.9 |
| SH12-7-16 | 143.6  | 228.9 | 0.63 | 0.05058 | 0.00067 | 0.11535 | 0.00198 | 0.01654 | 0.00017 | 220  | 31.5 | 110.8 | 1.8 | 105.8 | 1.1  | 1.0 |
| SH12-8-1  | 228.7  | 407.4 | 0.56 | 0.0504  | 0.00084 | 0.11512 | 0.00363 | 0.01661 | 0.0006  | 213  | 38.9 | 110.6 | 3.3 | 106.2 | 3.8  | 1.0 |
| SH12-8-2  | 225.8  | 293.6 | 0.77 | 0.05007 | 0.00052 | 0.11037 | 0.00152 | 0.01601 | 0.00018 | 198  | 24.1 | 106.3 | 1.4 | 102.4 | 1.1  | 1.0 |
| SH12-8-3  | 133.7  | 237.4 | 0.56 | 0.05046 | 0.00182 | 0.11264 | 0.00508 | 0.01623 | 0.00086 | 217  | 83.3 | 108.4 | 4.6 | 103.8 | 5.4  | 1.0 |
| SH12-8-4  | 439    | 439.7 | 1    | 0.05042 | 0.00037 | 0.11212 | 0.00158 | 0.01612 | 0.00018 | 213  | 16.7 | 107.9 | 1.4 | 103.1 | 1.2  | 1.0 |
| SH12-8-5  | 147.3  | 234.4 | 0.63 | 0.0508  | 0.00101 | 0.11366 | 0.00367 | 0.01627 | 0.00053 | 232  | 46.3 | 109.3 | 3.3 | 104   | 3.4  | 1.0 |
| SH12-8-6  | 306.2  | 545.7 | 0.56 | 0.05063 | 0.00039 | 0.11348 | 0.00182 | 0.01628 | 0.00025 | 233  | 18.5 | 109.1 | 1.7 | 104.1 | 1.6  | 1.0 |
| SH12-8-7  | 369.5  | 455.3 | 0.81 | 0.05042 | 0.00041 | 0.11298 | 0.00255 | 0.01629 | 0.00036 | 213  | 18.5 | 108.7 | 2.3 | 104.2 | 2.3  | 1.0 |
| SH12-8-8  | 143.4  | 338.9 | 0.42 | 0.0512  | 0.00118 | 0.11588 | 0.00463 | 0.01643 | 0.00058 | 250  | 53.7 | 111.3 | 4.2 | 105.1 | 3.7  | 0.9 |
| SH12-8-9  | 188.7  | 285.6 | 0.66 | 0.05022 | 0.00056 | 0.11194 | 0.00291 | 0.01621 | 0.00042 | 206  | 21.3 | 107.7 | 2.7 | 103.7 | 2.6  | 1.0 |

|            |        |       |      |         |         |         |         |         |         |      |      |       |     |       |      |     |
|------------|--------|-------|------|---------|---------|---------|---------|---------|---------|------|------|-------|-----|-------|------|-----|
| SH12-9-2   | 192.6  | 294.5 | 0.65 | 0.04878 | 0.00145 | 0.10779 | 0.00537 | 0.01599 | 0.00037 | 200  | 70.4 | 103.9 | 4.9 | 102.2 | 2.3  | 1.0 |
| SH12-9-3   | 315.3  | 397.9 | 0.79 | 0.0506  | 0.00043 | 0.11258 | 0.00112 | 0.01616 | 0.00012 | 233  | 15.7 | 108.3 | 1   | 103.3 | 0.8  | 1.0 |
| SH12-9-4   | 181    | 295.6 | 0.61 | 0.05073 | 0.00403 | 0.11635 | 0.00919 | 0.01664 | 0.00008 | 228  | 216  | 111.8 | 8.4 | 106.4 | 0.5  | 1.0 |
| SH12-9-5   | 138    | 303.7 | 0.45 | 0.06605 | 0.00109 | 0.15222 | 0.00254 | 0.01672 | 0.00011 | 809  | 35.2 | 143.9 | 2.2 | 106.9 | 0.7  | 0.7 |
| SH12-9-6   | 285.2  | 446.7 | 0.64 | 0.06026 | 0.0011  | 0.1411  | 0.00303 | 0.01698 | 0.00015 | 613  | 39.7 | 134   | 2.7 | 108.5 | 1.0  | 0.8 |
| SH12-9-7   | 245    | 345.2 | 0.71 | 0.05005 | 0.00193 | 0.11848 | 0.00482 | 0.01717 | 0.00012 | 198  | 88.9 | 113.7 | 4.4 | 109.7 | 0.8  | 1.0 |
| SH12-9-8   | 151.9  | 405.2 | 0.37 | 0.05163 | 0.00141 | 0.11491 | 0.00447 | 0.01613 | 0.00036 | 333  | 63   | 110.5 | 4.1 | 103.2 | 2.3  | 0.9 |
| SH12-9-9   | 241    | 346.1 | 0.7  | 0.05348 | 0.00336 | 0.12033 | 0.00614 | 0.01638 | 0.00053 | 350  | 138  | 115.4 | 5.6 | 104.8 | 3.4  | 0.9 |
| SH12-9-10  | 273.4  | 661.1 | 0.41 | 0.04982 | 0.00086 | 0.11018 | 0.00252 | 0.01604 | 0.00025 | 187  | 43.5 | 106.1 | 2.3 | 102.6 | 1.6  | 1.0 |
| SH12-9-11  | 86     | 260.4 | 0.33 | 0.05036 | 0.00158 | 0.11139 | 0.00387 | 0.01609 | 0.00052 | 213  | 41.7 | 107.2 | 3.5 | 102.9 | 3.3  | 1.0 |
| SH12-9-12  | 138    | 173.5 | 0.8  | 0.05022 | 0.00093 | 0.11105 | 0.00792 | 0.01596 | 0.00091 | 206  | 47.2 | 106.9 | 7.2 | 102.1 | 5.8  | 1.0 |
| SH12-9-13  | 557.1  | 1184  | 0.47 | 0.04977 | 0.00047 | 0.11146 | 0.0028  | 0.01624 | 0.00039 | 183  | 22.2 | 107.3 | 2.6 | 103.9 | 2.5  | 1.0 |
| SH12-9-14  | 274.7  | 367.2 | 0.75 | 0.04823 | 0.00093 | 0.11136 | 0.00412 | 0.01673 | 0.00045 | 109  | 50.9 | 107.2 | 3.8 | 106.9 | 2.9  | 1.0 |
| SH12-9-15  | 149.1  | 269.6 | 0.55 | 0.04848 | 0.00157 | 0.11023 | 0.00485 | 0.01636 | 0.00049 | 124  | 71.3 | 106.2 | 4.4 | 104.6 | 3.1  | 1.0 |
| SH12-9-16  | 406    | 511   | 0.79 | 0.04951 | 0.00034 | 0.10981 | 0.00114 | 0.0161  | 0.00013 | 172  | 10.2 | 105.8 | 1   | 102.9 | 0.8  | 1.0 |
| SH12-9-17  | 344.8  | 525   | 0.66 | 0.04911 | 0.00027 | 0.10875 | 0.00117 | 0.01607 | 0.00016 | 154  | 13   | 104.8 | 1.1 | 102.8 | 1.0  | 1.0 |
| SH12-9-18  | 383.7  | 397.5 | 0.97 | 0.05015 | 0.00037 | 0.11174 | 0.0013  | 0.01616 | 0.00014 | 211  | 18.5 | 107.6 | 1.2 | 103.3 | 0.9  | 1.0 |
| SH12-9-19  | 247.4  | 300.2 | 0.82 | 0.04983 | 0.00073 | 0.1123  | 0.00273 | 0.01634 | 0.00031 | 187  | 33.3 | 108.1 | 2.5 | 104.5 | 1.9  | 1.0 |
| SH12-9-20  | 111.5  | 188.6 | 0.59 | 0.05181 | 0.00082 | 0.11473 | 0.00224 | 0.01607 | 0.00019 | 276  | 41.7 | 110.3 | 2   | 102.8 | 1.2  | 0.9 |
| SH12-13-1  | 163.8  | 102.3 | 1.6  | 0.05143 | 0.00158 | 0.11112 | 0.00341 | 0.01569 | 0.0002  | 261  | 70.4 | 107   | 3.1 | 100.4 | 1.3  | 0.9 |
| SH12-13-2  | 307.3  | 184.1 | 1.67 | 0.04914 | 0.00132 | 0.10479 | 0.00232 | 0.01551 | 0.00018 | 154  | 58.3 | 101.2 | 2.1 | 99.2  | 1.2  | 1.0 |
| SH12-13-3  | 89.2   | 44.5  | 2.01 | 0.04906 | 0.0022  | 0.10401 | 0.00454 | 0.01556 | 0.00065 | 150  | 106  | 100.5 | 4.2 | 99.5  | 4.1  | 1.0 |
| SH12-13-4  | 461.3  | 160.2 | 2.88 | 0.04841 | 0.00324 | 0.10251 | 0.00809 | 0.01535 | 0.00074 | 121  | 213  | 99.1  | 7.5 | 98.2  | 4.7  | 1.0 |
| SH12-13-5  | 500.2  | 257.9 | 1.94 | 0.05056 | 0.00078 | 0.10731 | 0.00222 | 0.0154  | 0.0002  | 220  | 37   | 103.5 | 2   | 98.5  | 1.3  | 1.0 |
| SH12-13-6  | 618.1  | 304.5 | 2.03 | 0.05092 | 0.0021  | 0.1084  | 0.00727 | 0.01532 | 0.00051 | 235  | 94.4 | 104.5 | 6.7 | 98    | 3.2  | 0.9 |
| SH12-13-7  | 285.6  | 216.1 | 1.32 | 0.05108 | 0.00184 | 0.11022 | 0.00497 | 0.0157  | 0.00078 | 243  | 78.7 | 106.2 | 4.5 | 100.4 | 5.0  | 0.9 |
| SH12-13-8  | 766    | 424.6 | 1.8  | 0.04819 | 0.00077 | 0.10623 | 0.00584 | 0.016   | 0.00087 | 109  | 34.3 | 102.5 | 5.4 | 102.4 | 5.5  | 1.0 |
| SH12-13-9  | 672.1  | 358.8 | 1.87 | 0.0494  | 0.0004  | 0.10728 | 0.00175 | 0.01578 | 0.00024 | 165  | 18.5 | 103.5 | 1.6 | 100.9 | 1.5  | 1.0 |
| SH12-13-10 | 245.2  | 111.4 | 2.2  | 0.06343 | 0.00218 | 0.14735 | 0.00609 | 0.01685 | 0.00037 | 724  | 72.2 | 139.6 | 5.4 | 107.7 | 2.4  | 0.8 |
| SH12-13-11 | 230.9  | 215.1 | 1.07 | 0.0492  | 0.00348 | 0.10722 | 0.00998 | 0.01591 | 0.00158 | 167  | 156  | 103.4 | 9.2 | 101.8 | 10.1 | 1.0 |
| SH12-13-12 | 135    | 72.7  | 1.86 | 0.20426 | 0.02016 | 0.95295 | 0.19242 | 0.02277 | 0.00174 | 2861 | 161  | 679.6 | 100 | 145.1 | 10.9 | 0.2 |
| SH12-13-13 | 1449.2 | 383.1 | 3.78 | 0.04958 | 0.0005  | 0.10588 | 0.00251 | 0.01545 | 0.00032 | 176  | 24.1 | 102.2 | 2.3 | 98.9  | 2.0  | 1.0 |
| SH12-13-14 | 333.8  | 346.5 | 0.96 | 0.0489  | 0.00046 | 0.10343 | 0.00218 | 0.01538 | 0.00032 | 143  | 22.2 | 99.9  | 2   | 98.4  | 2.0  | 1.0 |
| SH12-13-15 | 284.1  | 260.4 | 1.09 | 0.049   | 0.00071 | 0.10615 | 0.00239 | 0.01569 | 0.00028 | 146  | 33.3 | 102.4 | 2.2 | 100.4 | 1.8  | 1.0 |
| SH12-13-16 | 511.8  | 215.7 | 2.37 | 0.05009 | 0.00104 | 0.11024 | 0.00396 | 0.016   | 0.00055 | 198  | 52.8 | 106.2 | 3.6 | 102.3 | 3.5  | 1.0 |
| SH12-14-1  | 520.5  | 211.1 | 2.47 | 0.05186 | 0.00116 | 0.11531 | 0.00409 | 0.01608 | 0.00036 | 280  | 51.8 | 110.8 | 3.7 | 102.8 | 2.3  | 0.9 |
| SH12-14-2  | 230.5  | 123.6 | 1.86 | 0.05068 | 0.00125 | 0.11052 | 0.00331 | 0.01588 | 0.00035 | 233  | 57.4 | 106.4 | 3   | 101.5 | 2.2  | 1.0 |
| SH12-14-3  | 802.4  | 307.6 | 2.61 | 0.05105 | 0.00193 | 0.11138 | 0.00724 | 0.01598 | 0.00109 | 243  | 87   | 107.2 | 6.6 | 102.2 | 6.9  | 1.0 |
| SH12-14-4  | 1316.4 | 443.8 | 2.97 | 0.0507  | 0.00054 | 0.10775 | 0.00174 | 0.01545 | 0.00022 | 228  | 19.4 | 103.9 | 1.6 | 98.8  | 1.4  | 1.0 |
| SH12-14-5  | 260.1  | 136   | 1.91 | 0.05567 | 0.00233 | 0.12064 | 0.00561 | 0.01575 | 0.0004  | 439  | 94.4 | 115.7 | 5.1 | 100.7 | 2.5  | 0.9 |
| SH12-14-6  | 1477.2 | 456.6 | 3.24 | 0.04955 | 0.00043 | 0.1061  | 0.00185 | 0.01558 | 0.00027 | 172  | 20.4 | 102.4 | 1.7 | 99.6  | 1.7  | 1.0 |
| SH12-14-7  | 243.3  | 172.1 | 1.41 | 0.05008 | 0.00281 | 0.11138 | 0.01018 | 0.01602 | 0.00125 | 198  | 132  | 107.2 | 9.3 | 102.5 | 7.9  | 1.0 |
| SH12-14-8  | 232.2  | 247.7 | 0.94 | 0.04996 | 0.00059 | 0.10806 | 0.00214 | 0.01568 | 0.00025 | 195  | 27.8 | 104.2 | 2   | 100.3 | 1.6  | 1.0 |
| SH12-14-9  | 92.3   | 135.8 | 0.68 | 0.05177 | 0.00108 | 0.17272 | 0.00458 | 0.02428 | 0.00054 | 276  | 45.4 | 161.8 | 4   | 154.6 | 3.4  | 1.0 |
| SH12-14-10 | 336.6  | 105.8 | 3.18 | 0.04999 | 0.00068 | 0.10747 | 0.00192 | 0.01558 | 0.00016 | 195  | 36.1 | 103.6 | 1.8 | 99.6  | 1.0  | 1.0 |
| SH12-14-11 | 842.2  | 848.9 | 0.99 | 0.04868 | 0.00115 | 0.10373 | 0.00601 | 0.01544 | 0.00068 | 132  | 55.6 | 100.2 | 5.5 | 98.8  | 4.3  | 1.0 |
| SH12-14-12 | 1137.8 | 282   | 4.03 | 0.04968 | 0.00132 | 0.1051  | 0.00548 | 0.01532 | 0.00058 | 189  | 61.1 | 101.5 | 5   | 98    | 3.7  | 1.0 |
| SH12-14-13 | 200.9  | 131.9 | 1.52 | 0.0488  | 0.00377 | 0.10691 | 0.01472 | 0.01576 | 0.00141 | 200  | 109  | 103.1 | 14  | 100.8 | 8.9  | 1.0 |
| SH12-14-14 | 985.5  | 436.1 | 2.26 | 0.0508  | 0.00185 | 0.11307 | 0.01129 | 0.01608 | 0.00108 | 232  | 88   | 108.8 | 10  | 102.8 | 6.8  | 0.9 |
| SH12-14-15 | 260    | 96.7  | 2.69 | 0.04817 | 0.00103 | 0.10318 | 0.00432 | 0.01553 | 0.00051 | 109  | 54.6 | 99.7  | 4   | 99.3  | 3.2  | 1.0 |
| SH12-14-16 | 348    | 120.3 | 2.89 | 0.05139 | 0.00267 | 0.10984 | 0.00369 | 0.01554 | 0.00036 | 258  | 86.1 | 105.8 | 3.4 | 99.4  | 2.3  | 0.9 |
| SH12-14-17 | 509.9  | 168.6 | 3.02 | 0.04941 | 0.00124 | 0.10667 | 0.0033  | 0.01565 | 0.00024 | 169  | 62   | 102.9 | 3   | 100.1 | 1.5  | 1.0 |
| SH12-14-18 | 138.5  | 168.3 | 0.82 | 0.0516  | 0.001   | 0.11306 | 0.00221 | 0.01593 | 0.00015 | 333  | 44.4 | 108.8 | 2   | 101.9 | 1.0  | 0.9 |
| SH12-14-19 | 198.9  | 81.1  | 2.45 | 0.0529  | 0.00185 | 0.11234 | 0.00356 | 0.0155  | 0.00028 | 324  | 112  | 108.1 | 3.2 | 99.2  | 1.7  | 0.9 |

Notes: 1, Region numbers as marked in figure 1;

2, Ratio of 206Pb/238U versus 207Pb/235U indicating concordance;

3, Data with cross lines are zircons that are either discordant, or errors over 3-5%, or inherited.

## References cited

- Guo, F. S., Yang, Q. K., Xie, C. F., Meng, X. J., Zhou, W. P., Jiang, Y. B., Zhang, S. M., and Wu, Z. C.: Zircon geochronology and evolution sequence of the acidic volcano intrusive complex from Xiangshan, Jiangxi Province, Chin J. Geol., 50(3), 684-707 (in Chinese with abstract), 2015.
- Hu, G., Hu, W. X., Cao, J., Yao, S. p., Wang, X. Y., and Liu, Y. X.: The zircon U-Pb dating of the Lower Cretaceous Bantou Formation in western Fujian and stratigraphic correlation, Adv. Earth Sci. 26(9), 933-943 (in Chinese with English abstract), 2011.
- Jiang, S. H., Bagas, L., and Liang, Q. L.: New insights into the petrogenesis of volcanic rocks in the Shanghang Basin in the Fujian Province, China. J. Asian Earth Sci., 105, 48-67, 2015.
- Jiang, S. H., Liang, Q. L., Bagas, L., Wang, S. H., Nie, F. J., and Liu, Y. F.: Geodynamic setting of the Zijinshan porphyry-epithermal Cu-Au-Mo-Ag ore system, SW Fujian Province, China: constraints from the geochronology and geochemistry of the igneous rocks. Ore Geol. Rev., 53, 287-305, 2013.
- Li, C. L., Wang, Z. X., Wang, D. X., Cao, W. T., Yu, X. Q., Zhou, G. Z., and Gao, W. L.: Crust-mantle interaction triggered by oblique subduction of the Pacific plate: geochronological, geochemical, and Hf isotopic evidence from the Early Cretaceous volcanic rocks of Zhejiang Province, southeast China, Intl. Geol. Rev., 56(14), 1732-1753, doi: 10.1080/00206814.2014.956347, 2014.
- Li, J. H., Ma, Z. L., Zhang, Y. Q., Dong, S. W., Li, Y., Lu, M. A., and Tan, J. Q.: Tectonic evolution of Cretaceous extensional basins in Zhejiang Province, eastern South China: Structural and geochronological constraints. Intl. Geol. Rev., 56(13), 1602-1629, doi: 10.1080/00206814.2014.951978, 2014.
- Liu, F. Y., Wu, J. H., and Liu, S.: Early Cretaceous zircon SHRIMP U-Pb age of the trachyte and its significances of the Gan-Hang belt. J. East China Inst. Techn., 32((4)), 330-335 (in Chinese with English abstract), 2009.
- Liu, L., Xu, X. S., and Xia, Y.: Asynchronizing paleo-Pacific slab rollback beneath SE China: Insights from the episodic Late Mesozoic volcanism, Gond. Res., 37, 397-407, 2016.
- Liu, L., Xu, X. S., and Xia, Y.: Cretaceous Pacific plate movement beneath SE China: Evidence from episodic volcanism and related intrusions, Tectonophysics, 614, 170-184, 2014.
- Liu, L., Xu, X. S., and Zou, H. B.: Episodic eruptions of the Late Mesozoic volcanic sequences in southeastern Zhejiang, SE China: petrogenesis and implications for the geodynamics of paleo-Pacific subduction, Lithos, 154, 166-180, 2012.
- Ma, Z. L., Li, J. H., Zhang, Y. Q., Dong, S. W., Song, C. Z., and Li, Y.: Geochronological and structural constraints on the lithostratigraphic units of the Lishui Basin, southeastern China, Geol. China, 43(1), 56-71 (in Chinese with English abstract), 2016.
- Shu, X., Yang, S. Y., Jiang, S. Y., and Ye, M.: Petrogenesis and geodynamic setting of Early Cretaceous felsic rocks in the Gan-Hang Belt, Southeast China: Constraints from geochronology and geochemistry of the tuffs and trachyandesitic rocks in Shengyuan volcanic Basin, Lithos, 284-285, 691-708, 2017.



- Su, H. M., Mao, J. W., He, X. R., and Lu, R.: Timing of the formation of the Tianhuashan Basin, northern Wuyi: constraints from geochronology of volcanic and plutonic rocks, *Sci. China (Series D)*, 56, 940-955, 2013.
- Su, H. M., Mao, J. W., Santosh, M., and Xie, G. Q.: Petrogenesis and tectonic significance of Late Jurassic–Early Cretaceous volcanic–intrusive complex in the Tianhuashan basin, South China, *Ore Geol. Rev.*, 56, 566-583, 2014.
- Wang, J. E., Liu, Y. D., Wang, Z., Tao, L., and Li, Y.: SHRIMP zircon U-Pb ages of the Zhucun Formation of the Moshishan Group in Zhejiang, *J. Stratigr.*, 39(2), 267-273 (in Chinese with English abstract), 2015.
- Wang, J. E., Wang, Z., Liu, Y. D., and Liang, H.: Geological age and structural environment of volcanic rocks from the Laocun Formation (Jiande Group), *J. Stratigr.*, 40(3), 261-271 (in Chinese with English abstract), 2016.
- Wu, J. H., Lao, Y. J., Xie, G. F., Zhang, J. Y., Wu, R. G., Nie, F. J.: Stratigraphy and geochronology of the volcanic rocks in the Xiangshan uranium orefield, Jiangxi Province and its geological implications. *Geol. China*, 44(5), 974- 992 (in Chinese with English abstract), 2017.
- Wu, J. H., Liu, F. Y., and Liu, Sh.: SHRIMP U-Pb Zircon Age of Late Mesozoic Trachyte in Xiajiang—Guangfeng and Sannan (Quannan, Dingnan and Longnan)—Xunwu Volcanic Belts, *Geol. Rev.*, 57(1), 125-132 (in Chinese with English abstract), 2011a.
- Wu, J. H., Xiang, Y. X., and Liu, S.: Wuyi Group of southern Jiangxi and its geological age, *J. Stratigr.*, 35(2), 200-208 (in Chinese with English abstract), 2011b.
- Wu, J., and Wu, J. H.: Shuangfengling formation in Jiangxi and its geological age, *J. East China Inst. Techn.*, 36, 17-24 (in Chinese with English abstract), 2013.
- Yang, S. Y., Jiang, S. Y., Jiang, Y. H., Zhao, K. D., and Fan, H. H.: Zircon U-Pb geochronology, Hf isotopic composition and geological implications of the rhyodacite and rhyodacitic porphyry in the Xiangshan uranium ore field, Jiangxi Province, China, *Sci. China (Earth Sci.)*, 40(8), 953-969, doi: 10.1007/s11430-010-4058-0, 2010.
- Yang, S. Y., Jiang, S. Y., Zhao, K. D., Jiang, Y. H., Ling, H. F., and Chen, P. R.: Timing and geological implications of volcanic rocks from the Ruyiting Section, Xiangshan uranium ore field, Jiangxi province, SE China, *Acta Petro. Sin.*, 29(12), 4362-4372 (in Chinese with English abstract), 2013.
- Zhang, F. Q., Chen, H. L., Batt, G. E., Li, Z. X., and Yang, S. F.: Early Cretaceous Aptian charcoal from Xinchang petrified wood national Geopark of Zhejiang province, eastern South China, *Palaios*, 29, 325-337, doi: <http://dx.doi.org/10.2110/palo.2013.130>, 2014.
- Zhang, J. H., Yang, J. H., Chen, J. Y., Wu, F. Y., and Wilde, S. A.: Genesis of late Early Cretaceous high-silica rhyolites in eastern Zhejiang Province, southeast China: A crystal mush origin with mantle input, *Lithos*, 296-299, 482-495, 2018.
- Zhang, J. J, Shi, G. H., Tong, G. S., Zhang, Z. Y., Liu, H., Wu, R. T., and Chen, L.: Geochemistry and geochronology of copper and polymetal-bearing volcanic rocks of the Ehuling Formation in Xujiadun, Zhejiang Province, *Acta Geol. Sin.*, 83, 791-799 (in Chinese with English abstract), 2009.

Table S3 Details of single zircon U-Pb isotope ages of volcanic and pyroclastic rocks from former works in the CZ, South China

| Analysis                                                                             | Th U  |       | Isotopic ratio |                                      |         |                                     |         |                                     |         |                                      |         |                                      | Age (Ma) |                                     |     |                                     |      |                                      |      |      | Con-<br>cord |
|--------------------------------------------------------------------------------------|-------|-------|----------------|--------------------------------------|---------|-------------------------------------|---------|-------------------------------------|---------|--------------------------------------|---------|--------------------------------------|----------|-------------------------------------|-----|-------------------------------------|------|--------------------------------------|------|------|--------------|
|                                                                                      | (ppm) | (ppm) | Th/U           | <sup>207</sup> Pb/ <sup>206</sup> Pb |         | <sup>207</sup> Pb/ <sup>235</sup> U |         | <sup>206</sup> Pb/ <sup>238</sup> U |         | <sup>208</sup> Pb/ <sup>232</sup> Th |         | <sup>207</sup> Pb/ <sup>206</sup> Pb |          | <sup>207</sup> Pb/ <sup>235</sup> U |     | <sup>206</sup> Pb/ <sup>238</sup> U |      | <sup>208</sup> Pb/ <sup>232</sup> Th |      |      |              |
|                                                                                      |       |       |                | 1σ                                   | 1σ      | 1σ                                  | 1σ      | 1σ                                  | 1σ      | 1σ                                   | 1σ      | 1σ                                   | 1σ       | 1σ                                  | 1σ  | 1σ                                  | 1σ   | 1σ                                   |      |      |              |
| Zhejiang province                                                                    |       |       |                |                                      |         |                                     |         |                                     |         |                                      |         |                                      |          |                                     |     |                                     |      |                                      |      |      |              |
| N1, Xiaoxiong, Sanmen (Liu et al., 2012)                                             |       |       |                |                                      |         |                                     |         |                                     |         |                                      |         |                                      |          |                                     |     |                                     |      |                                      |      |      |              |
| XX06-01                                                                              | 2981  | 574   | 5.20           | 0.04794                              | 0.00196 | 0.09661                             | 0.00387 | 0.01462                             | 0.00021 | 0.00547                              | 0.00068 | 96                                   | 92       | 94                                  | 4   | 94                                  | 1    | 110                                  | 14   | 1.00 |              |
| XX06-02                                                                              | 981   | 406   | 2.42           | 0.05036                              | 0.00221 | 0.10229                             | 0.00443 | 0.01474                             | 0.00021 | 0.00568                              | 0.00056 | 212                                  | 104      | 99                                  | 4   | 94                                  | 1    | 114                                  | 11   | 0.95 |              |
| XX06-03                                                                              | 707   | 339   | 2.09           | 0.04797                              | 0.00256 | 0.09528                             | 0.00502 | 0.01441                             | 0.00022 | 0.00537                              | 0.00051 | 98                                   | 120      | 92                                  | 5   | 92                                  | 1    | 108                                  | 10   | 1.00 |              |
| XX06-04                                                                              | 1165  | 598   | 1.95           | 0.04922                              | 0.00162 | 0.09714                             | 0.00317 | 0.01432                             | 0.00019 | 0.00515                              | 0.00050 | 158                                  | 79       | 94                                  | 3   | 92                                  | 1    | 104                                  | 10   | 0.98 |              |
| XX06-05                                                                              | 3706  | 708   | 5.23           | 0.04782                              | 0.00207 | 0.09760                             | 0.00413 | 0.01482                             | 0.00022 | 0.00563                              | 0.00078 | 90                                   | 97       | 95                                  | 4   | 95                                  | 1    | 113                                  | 16   | 1.00 |              |
| XX06-06                                                                              | 516   | 357   | 1.45           | 0.04828                              | 0.00340 | 0.10681                             | 0.00736 | 0.01605                             | 0.00030 | 0.00620                              | 0.00102 | 113                                  | 158      | 103                                 | 7   | 103                                 | 2    | 125                                  | 20   | 1.00 |              |
| XX06-07                                                                              | 1107  | 429   | 2.58           | 0.04821                              | 0.00220 | 0.11215                             | 0.00503 | 0.01688                             | 0.00024 | 0.00611                              | 0.00077 | 110                                  | 103      | 108                                 | 5   | 108                                 | 2    | 123                                  | 15   | 1.00 |              |
| XX06-08                                                                              | 2126  | 1257  | 1.69           | 0.04933                              | 0.00107 | 0.09889                             | 0.00214 | 0.01455                             | 0.00018 | 0.00521                              | 0.00051 | 164                                  | 52       | 96                                  | 2   | 93                                  | 1    | 105                                  | 10   | 0.97 |              |
| XX06-09                                                                              | 7149  | 1048  | 6.82           | 0.04928                              | 0.00162 | 0.10048                             | 0.00322 | 0.01480                             | 0.00020 | 0.00466                              | 0.00061 | 161                                  | 78       | 97                                  | 3   | 95                                  | 1    | 94                                   | 12   | 0.98 |              |
| XX06-10                                                                              | 1429  | 429   | 3.33           | 0.05409                              | 0.00209 | 0.10815                             | 0.00413 | 0.01451                             | 0.00020 | 0.00505                              | 0.00046 | 375                                  | 89       | 104                                 | 4   | 93                                  | 1    | 102                                  | 9    | 0.89 |              |
| XX06-11                                                                              | 1026  | 388   | 2.65           | 0.04751                              | 0.00226 | 0.09668                             | 0.00455 | 0.01477                             | 0.00021 | 0.00556                              | 0.00084 | 75                                   | 105      | 94                                  | 4   | 95                                  | 1    | 112                                  | 17   | 1.01 |              |
| XX06-12                                                                              | 1604  | 735   | 2.18           | 0.04883                              | 0.00157 | 0.09881                             | 0.00316 | 0.01468                             | 0.00020 | 0.00482                              | 0.00065 | 140                                  | 77       | 96                                  | 3   | 94                                  | 1    | 97                                   | 13   | 0.98 |              |
| XX06-13                                                                              | 2349  | 558   | 4.21           | 0.04930                              | 0.00175 | 0.09956                             | 0.00349 | 0.01465                             | 0.00020 | 0.00539                              | 0.00085 | 162                                  | 84       | 96                                  | 3   | 94                                  | 1    | 109                                  | 17   | 0.98 |              |
| XX06-14                                                                              | 285   | 138   | 2.06           | 0.04802                              | 0.00661 | 0.12664                             | 0.01712 | 0.01916                             | 0.00054 | 0.00602                              | 0.00167 | 400                                  | 276      | 121                                 | 15  | 122                                 | 3    | 121                                  | 34   | 1.01 |              |
| XX06-15                                                                              | 1153  | 334   | 3.45           | 0.04802                              | 0.00298 | 0.09778                             | 0.00595 | 0.01477                             | 0.00025 | 0.00458                              | 0.00099 | 100                                  | 139      | 95                                  | 6   | 95                                  | 2    | 92                                   | 20   | 1.00 |              |
| XX06-16                                                                              | 661   | 353   | 1.87           | 0.04789                              | 0.00246 | 0.09742                             | 0.00493 | 0.01476                             | 0.00022 | 0.00566                              | 0.00108 | 94                                   | 115      | 94                                  | 5   | 94                                  | 1    | 114                                  | 22   | 1.00 |              |
| XX06-18                                                                              | 919   | 473   | 1.95           | 0.04894                              | 0.00155 | 0.14164                             | 0.00445 | 0.02100                             | 0.00028 | 0.00671                              | 0.00107 | 145                                  | 76       | 135                                 | 4   | 134                                 | 2    | 135                                  | 21   | 0.99 |              |
| XX06-19                                                                              | 1850  | 452   | 4.09           | 0.04942                              | 0.00422 | 0.09795                             | 0.00811 | 0.01438                             | 0.00035 | 0.00392                              | 0.00133 | 168                                  | 194      | 95                                  | 8   | 92                                  | 2    | 79                                   | 27   | 0.97 |              |
| XX06-20                                                                              | 294   | 207   | 1.42           | 0.04775                              | 0.00496 | 0.09656                             | 0.00985 | 0.01467                             | 0.00034 | 0.00484                              | 0.00138 | 87                                   | 229      | 94                                  | 9   | 94                                  | 2    | 98                                   | 28   | 1.00 |              |
| N2, Taozu (Chen et al., 2008)                                                        |       |       |                |                                      |         |                                     |         |                                     |         |                                      |         |                                      |          |                                     |     |                                     |      |                                      |      |      |              |
| ZJ-23-1                                                                              |       |       |                |                                      | 0.09140 | 0.00091                             | 0.04023 | 0.00035                             | 0.00446 | 0.00002                              |         |                                      | 89       | 1                                   | 254 | 2                                   | 90   | 0.4                                  | 2.85 |      |              |
| ZJ-23-2                                                                              |       |       |                |                                      | 0.34366 | 0.23684                             | 0.01625 | 0.00176                             | 0.00455 | 0.00061                              |         |                                      | 300      | ##                                  | 104 | 11                                  | 92   | 12                                   | 0.35 |      |              |
| ZJ-23-3                                                                              |       |       |                |                                      | 0.09035 | 0.00311                             | 0.01423 | 0.00013                             | 0.00517 | 0.00009                              |         |                                      | 88       | 3                                   | 91  | 0.8                                 | 104  | 2                                    | 1.03 |      |              |
| ZJ-23-4                                                                              |       |       |                |                                      | 0.08951 | 0.00252                             | 0.01364 | 0.00013                             | 0.00433 | 0.00003                              |         |                                      | 87       | 2                                   | 87  | 0.8                                 | 87   | 0.7                                  | 1.00 |      |              |
| ZJ-23-5                                                                              |       |       |                |                                      | 0.09312 | 0.00265                             | 0.01366 | 0.00013                             | 0.00432 | 0.00003                              |         |                                      | 90       | 2                                   | 88  | 0.8                                 | 87   | 0.7                                  | 0.98 |      |              |
| ZJ-23-6                                                                              |       |       |                |                                      | 0.09211 | 0.00088                             | 0.01391 | 0.00012                             | 0.00448 | 0.00002                              |         |                                      | 90       | 1                                   | 89  | 0.8                                 | 90   | 0.4                                  | 0.99 |      |              |
| ZJ-23-7                                                                              |       |       |                |                                      | 0.07573 | 0.00188                             | 0.01193 | 0.00011                             | 0.00482 | 0.00006                              |         |                                      | 74       | 2                                   | 76  | 0.7                                 | 97   | 1                                    | 1.03 |      |              |
| ZJ-23-8                                                                              |       |       |                |                                      | 0.09392 | 0.00086                             | 0.01342 | 0.00012                             | 0.00426 | 0.00002                              |         |                                      | 91       | 1                                   | 86  | 0.8                                 | 86   | 0.4                                  | 0.95 |      |              |
| ZJ-23-9                                                                              |       |       |                |                                      | 0.08217 | 0.00072                             | 0.01180 | 0.00010                             | 0.00392 | 0.00002                              |         |                                      | 80       | 1                                   | 76  | 0.6                                 | 79   | 0.4                                  | 0.95 |      |              |
| ZJ-23-10                                                                             |       |       |                |                                      | 0.07685 | 0.00067                             | 0.01156 | 0.00010                             | 0.00367 | 0.00002                              |         |                                      | 75       | 1                                   | 74  | 0.6                                 | 74   | 0.4                                  | 0.99 |      |              |
| ZJ-23-11                                                                             |       |       |                |                                      | 0.08574 | 0.00076                             | 0.01213 | 0.00011                             | 0.00469 | 0.00003                              |         |                                      | 84       | 1                                   | 78  | 0.7                                 | 95   | 0.6                                  | 0.93 |      |              |
| ZJ-23-12                                                                             |       |       |                |                                      | 0.14579 | 0.00141                             | 0.01489 | 0.00013                             | 0.00572 | 0.00003                              |         |                                      | 138      | 1                                   | 95  | 0.8                                 | 115  | 0.6                                  | 0.69 |      |              |
| ZJ-23-13                                                                             |       |       |                |                                      | 0.08869 | 0.00252                             | 0.01397 | 0.00012                             | 0.00470 | 0.00006                              |         |                                      | 86       | 2                                   | 89  | 0.8                                 | 95   | 1                                    | 1.03 |      |              |
| ZJ-23-14                                                                             |       |       |                |                                      | 0.17677 | 0.00158                             | 0.01426 | 0.00013                             | 0.00621 | 0.00003                              |         |                                      | 165      | 1                                   | 91  | 0.8                                 | 125  | 0.6                                  | 0.55 |      |              |
| ZJ-23-15                                                                             |       |       |                |                                      | 0.08795 | 0.00264                             | 0.01385 | 0.00012                             | 0.00460 | 0.00009                              |         |                                      | 86       | 2                                   | 89  | 0.8                                 | 93   | 2                                    | 1.03 |      |              |
| ZJ-23-16                                                                             |       |       |                |                                      | 0.08310 | 0.00074                             | 0.01181 | 0.00010                             | 0.00443 | 0.00002                              |         |                                      | 81       | 1                                   | 76  | 0.6                                 | 89   | 0.4                                  | 0.94 |      |              |
| ZJ-23-17                                                                             |       |       |                |                                      | 0.17045 | 0.00299                             | 0.01361 | 0.00013                             | 0.00401 | 0.00004                              |         |                                      | 160      | 3                                   | 87  | 0.8                                 | 81   | 0.7                                  | 0.54 |      |              |
| ZJ-23-18                                                                             |       |       |                |                                      | 0.08560 | 0.00076                             | 0.01183 | 0.00010                             | 0.00414 | 0.00002                              |         |                                      | 83       | 1                                   | 76  | 0.6                                 | 84   | 0.4                                  | 0.92 |      |              |
| ZJ-23-19                                                                             |       |       |                |                                      | 0.08615 | 0.00077                             | 0.01285 | 0.00011                             | 0.00443 | 0.00002                              |         |                                      | 84       | 1                                   | 82  | 0.7                                 | 89   | 0.4                                  | 0.98 |      |              |
| ZJ-23-20                                                                             |       |       |                |                                      | 0.11021 | 0.00096                             | 0.01222 | 0.00011                             | 0.00435 | 0.00002                              |         |                                      | 106      | 1                                   | 78  | 0.7                                 | 88   | 0.4                                  | 0.74 |      |              |
| ZJ-23-21                                                                             |       |       |                |                                      | 0.08713 | 0.00332                             | 0.01372 | 0.00013                             | 0.00480 | 0.00012                              |         |                                      | 85       | 3                                   | 88  | 0.8                                 | 97   | 2                                    | 1.04 |      |              |
| ZJ-23-22                                                                             |       |       |                |                                      | 0.09015 | 0.00234                             | 0.01420 | 0.00012                             | 0.00548 | 0.00330                              |         |                                      | 88       | 2                                   | 91  | 0.8                                 | 9819 | 41                                   | 1.03 |      |              |
| ZJ-23-23                                                                             |       |       |                |                                      | 0.07504 | 0.00224                             | 0.01182 | 0.00010                             | 0.00497 | 0.00009                              |         |                                      | 73       | 2                                   | 76  | 0.7                                 | 100  | 2                                    | 1.04 |      |              |
| ZJ-23-24                                                                             |       |       |                |                                      | 0.10390 | 0.00930                             | 0.01303 | 0.00012                             | 0.00527 | 0.00003                              |         |                                      | 100      | 1                                   | 84  | 0.8                                 | 106  | 0.6                                  | 0.84 |      |              |
| ZJ-23-25                                                                             |       |       |                |                                      | 0.08660 | 0.00079                             | 0.01338 | 0.00012                             | 0.00483 | 0.00003                              |         |                                      | 84       | 1                                   | 86  | 0.8                                 | 97   | 0.6                                  | 1.02 |      |              |
| N3, Tangshang, Tiantai (TS01 from Liu et al., 2012; another from Zhang et al., 2018) |       |       |                |                                      |         |                                     |         |                                     |         |                                      |         |                                      |          |                                     |     |                                     |      |                                      |      |      |              |
| TS01-01                                                                              | 722   | 576   | 1.25           | 0.04937                              | 0.00150 | 0.11738                             | 0.00367 | 0.01725                             | 0.00029 | 0.00515                              | 0.00043 | 165                                  | 73       | 113                                 | 3   | 110                                 | 2    | 104                                  | 9    | 0.97 |              |
| TS01-02                                                                              | 1346  | 1361  | 0.99           | 0.04955                              | 0.00097 | 0.11870                             | 0.00259 | 0.01738                             | 0.00027 | 0.00518                              | 0.00042 | 174                                  | 47       | 114                                 | 2   | 111                                 | 2    | 104                                  | 8    | 0.97 |              |
| TS01-03                                                                              | 285   | 131   | 2.18           | 0.05028                              | 0.00367 | 0.12131                             | 0.00874 | 0.01750                             | 0.00038 | 0.00555                              | 0.00054 | 208                                  | 167      | 116                                 | 8   | 112                                 | 2    | 112                                  | 11   | 0.97 |              |
| TS01-04                                                                              | 426   | 204   | 2.09           | 0.04835                              | 0.00286 | 0.11369                             | 0.00663 | 0.01706                             | 0.00035 | 0.00515                              | 0.00054 | 116                                  | 133      | 109                                 | 6   | 109                                 | 2    | 104                                  | 11   | 1.00 |              |
| TS01-07                                                                              | 524   | 391   | 1.34           | 0.04794                              | 0.00346 | 0.11874                             | 0.00841 | 0.01797                             | 0.00046 | 0.00482                              | 0.00077 | 96                                   | 162      | 114                                 | 8   | 115                                 | 3    | 97                                   | 15   | 1.01 |              |
| TS01-08                                                                              | 246   | 181   | 1.35           | 0.04867                              | 0.00303 | 0.11760                             | 0.00724 | 0.01753                             | 0.00037 | 0.00523                              | 0.00065 | 132                                  | 141      | 113                                 | 7   | 112                                 | 2    | 105                                  | 13   | 0.99 |              |
| TS01-09                                                                              | 874   | 802   | 1.09           | 0.04846                              | 0.00209 | 0.11303                             | 0.00489 | 0.01692                             | 0.00034 | 0.00506                              | 0.00079 | 122                                  | 98       | 109                                 | 4   | 108                                 | 2    | 102                                  | 16   | 0.99 |              |
| TS01-11                                                                              | 229   | 145   | 1.58           | 0.04841                              | 0.00344 | 0.11796                             | 0.00830 | 0.01768                             | 0.00038 | 0.00548                              | 0.00046 | 119                                  | 160      | 113                                 | 8   | 113                                 | 2    | 110                                  | 9    | 1.00 |              |
| TS01-12                                                                              | 725   | 351   | 2.07           | 0.04753                              | 0.00196 | 0.11215                             | 0.00465 | 0.01712                             | 0.00031 | 0.00495                              | 0.00043 | 76                                   | 92       | 108                                 | 4   | 109                                 | 2    | 100                                  | 9    | 1.01 |              |
| TS01-13                                                                              | 896   | 439   | 2.04           | 0.04820                              | 0.00186 | 0.11556                             | 0.00447 | 0.01739                             | 0.00031 | 0.00486                              | 0.00047 | 109                                  | 88       | 111                                 | 4   | 111                                 | 2    | 98                                   | 9    | 1.00 |              |
| TS01-14                                                                              | 671   | 473   | 1.42           | 0.04855                              | 0.00181 | 0.11862                             | 0.00448 | 0.01773                             | 0.00032 | 0.00517                              | 0.00046 | 126                                  | 86       |                                     |     |                                     |      |                                      |      |      |              |

|            |     |     |      |         |         |        |         |       |     |       |     |      |
|------------|-----|-----|------|---------|---------|--------|---------|-------|-----|-------|-----|------|
| 10ZJ125-10 | 826 | 310 | 2.67 | 0.11481 | 0.00325 | 0.0177 | 0.00155 | 110.4 | 3.4 | 113.4 | 1.7 | 1.03 |
| 10ZJ125-11 | 366 | 244 | 1.5  | 0.13285 | 0.00373 | 0.0207 | 0.00153 | 126.7 | 4.4 | 131.9 | 2.0 | 1.04 |
| 10ZJ125-12 | 697 | 481 | 1.45 | 0.11084 | 0.00437 | 0.0171 | 0.00151 | 106.7 | 4.4 | 109.5 | 1.6 | 1.03 |
| 10ZJ125-13 | 287 | 272 | 1.05 | 0.14060 | 0.00381 | 0.0206 | 0.00154 | 133.6 | 4.8 | 131.4 | 2.0 | 0.98 |
| 10ZJ125-14 | 167 | 178 | 0.94 | 0.11997 | 0.0061  | 0.0172 | 0.0019  | 115.0 | 6.7 | 110.2 | 2.1 | 0.96 |
| 10ZJ125-15 | 300 | 362 | 0.83 | 0.14162 | 0.00352 | 0.0209 | 0.00152 | 134.5 | 4.4 | 133.5 | 2.0 | 0.99 |
| 10ZJ125-16 | 390 | 331 | 1.18 | 0.12053 | 0.00414 | 0.0176 | 0.00151 | 115.6 | 4.5 | 112.6 | 1.7 | 0.97 |

N4, Jiuliping, Tiantai (Chen et al., 2008; Liu et al., 2012)

|          |         |         |         |         |         |         |      |    |      |     |      |     |      |
|----------|---------|---------|---------|---------|---------|---------|------|----|------|-----|------|-----|------|
| JL-02-1  | 0.49262 | 0.00425 | 0.06460 | 0.00056 | 0.02012 | 0.00010 | 407  | 6  | 404  | 12  | 403  | 4.1 | 0.99 |
| JL-02-2  | 0.28587 | 0.00246 | 0.03518 | 0.00030 | 0.01234 | 0.00006 | 255  | 4  | 223  | 3.8 | 248  | 2.5 | 0.87 |
| JL-02-3  | 0.27427 | 0.00249 | 0.03574 | 0.00031 | 0.01081 | 0.00006 | 246  | 4  | 226  | 3.8 | 217  | 2.3 | 0.92 |
| JL-02-4  | 0.21204 | 0.00182 | 0.02882 | 0.00025 | 0.00928 | 0.00005 | 195  | 3  | 183  | 3.1 | 187  | 1.9 | 0.94 |
| JL-02-5  | 0.19922 | 0.00170 | 0.02886 | 0.00025 | 0.01033 | 0.00005 | 185  | 3  | 183  | 3.1 | 208  | 2.1 | 0.99 |
| JL-02-6  | 0.20543 | 0.00178 | 0.02875 | 0.00026 | 0.01052 | 0.00005 | 190  | 3  | 183  | 3.2 | 212  | 2.2 | 0.96 |
| JL-02-7  | 0.14241 | 0.00129 | 0.02091 | 0.00018 | 0.00664 | 0.00003 | 135  | 2  | 133  | 2.3 | 134  | 1.4 | 0.99 |
| JL-02-8  | 0.17890 | 0.00155 | 0.01972 | 0.00017 | 0.00734 | 0.00004 | 167  | 3  | 126  | 2.2 | 148  | 1.5 | 0.75 |
| JL-02-9  | 0.14826 | 0.00135 | 0.02045 | 0.00018 | 0.00630 | 0.00003 | 140  | 2  | 131  | 2.3 | 127  | 1.3 | 0.94 |
| JL-02-10 | 0.16663 | 0.00144 | 0.02041 | 0.00018 | 0.00760 | 0.00004 | 157  | 3  | 130  | 2.3 | 153  | 1.6 | 0.83 |
| JL-02-11 | 0.12623 | 0.00109 | 0.01592 | 0.00014 | 0.00571 | 0.00003 | 121  | 2  | 102  | 1.8 | 115  | 1.2 | 0.84 |
| JL-02-12 | 0.24120 | 0.00207 | 0.01674 | 0.00015 | 0.00767 | 0.00004 | 219  | 3  | 107  | 1.9 | 155  | 1.6 | 0.49 |
| JL-02-13 | 0.10553 | 0.00092 | 0.01621 | 0.00014 | 0.00539 | 0.00003 | 102  | 2  | 104  | 1.8 | 109  | 1.1 | 1.02 |
| JL-02-14 | 0.11834 | 0.00102 | 0.01607 | 0.00014 | 0.00525 | 0.00003 | 114  | 2  | 103  | 1.8 | 106  | 1.1 | 0.90 |
| JL-02-15 | 0.10763 | 0.00098 | 0.01509 | 0.00013 | 0.00496 | 0.00003 | 104  | 2  | 97   | 1.7 | 100  | 1.1 | 0.93 |
| JL-02-16 | 0.12531 | 0.00108 | 0.01582 | 0.00014 | 0.00514 | 0.00003 | 120  | 2  | 101  | 1.8 | 104  | 1.1 | 0.84 |
| JL-02-17 | 0.10701 | 0.00093 | 0.01588 | 0.00014 | 0.00526 | 0.00003 | 103  | 2  | 102  | 1.8 | 106  | 1.1 | 0.99 |
| JL-02-18 | 0.13090 | 0.00114 | 0.01572 | 0.00014 | 0.00504 | 0.00003 | 125  | 2  | 101  | 1.8 | 102  | 1   | 0.81 |
| JL-02-19 | 0.11913 | 0.00104 | 0.01559 | 0.00014 | 0.00558 | 0.00003 | 114  | 2  | 100  | 1.8 | 113  | 1.2 | 0.88 |
| JL-02-20 | 0.11871 | 0.00103 | 0.01569 | 0.00014 | 0.00553 | 0.00003 | 114  | 2  | 100  | 1.8 | 111  | 1.1 | 0.88 |
| JL-02-21 | 0.11958 | 0.00105 | 0.01160 | 0.00010 | 0.00418 | 0.00002 | 115  | 2  | 74   | 1.3 | 84   | 0.9 | 0.64 |
| JL-02-22 | 0.27192 | 0.00232 | 0.02218 | 0.00019 | 0.01025 | 0.00005 | 244  | 4  | 141  | 2.4 | 206  | 2.1 | 0.58 |
| JL-02-23 | 0.24503 | 0.00211 | 0.01679 | 0.00015 | 0.00622 | 0.00003 | 223  | 3  | 107  | 1.9 | 125  | 1.3 | 0.48 |
| JL-02-24 | 0.30109 | 0.00260 | 0.01705 | 0.00015 | 0.00776 | 0.00004 | 267  | 4  | 109  | 8.1 | 156  | 1.6 | 0.41 |
| JL-02-25 | 4.21667 | 0.03565 | 0.27246 | 0.00237 | 0.08926 | 0.00045 | 1677 | 14 | 1562 | 28  | 1728 | 17  | 0.93 |
| JL-02-26 | #####   | 0.28665 | 0.31221 | 0.00270 | 0.80703 | 0.00409 | 3607 | 17 | 1752 | 33  | 92   |     | 0.49 |
| JL-02-27 | #####   | 0.17916 | 0.19409 | 0.00173 | 0.00966 | 0.00005 | 3128 | 17 | 1144 | 33  | 194  | 2   | 0.37 |
| JL-02-28 | 3.00957 | 0.02590 | 0.04084 | 0.00035 | 0.08682 | 0.00045 | 1410 | 13 | 258  | 26  | 1683 | 17  | 0.18 |
| JL-02-29 | 0.68973 | 0.00589 | 0.02189 | 0.00019 | 0.01708 | 0.00009 | 533  | 7  | 140  | 14  | 342  | 3.5 | 0.26 |
| JL-02-30 | 0.60353 | 0.00510 | 0.02605 | 0.00022 | 0.03715 | 0.00019 | 480  | 7  | 166  | 13  | 737  | 7.4 | 0.35 |

|         |     |     |      |         |         |         |         |         |         |         |         |     |     |     |    |     |   |     |    |      |
|---------|-----|-----|------|---------|---------|---------|---------|---------|---------|---------|---------|-----|-----|-----|----|-----|---|-----|----|------|
| GW01-01 | 529 | 221 | 2.39 | 0.04890 | 0.00292 | 0.14053 | 0.00820 | 0.02085 | 0.00036 | 0.00855 | 0.00198 | 143 | 135 | 134 | 7  | 133 | 2 | 172 | 40 | 0.99 |
| GW01-02 | 190 | 84  | 2.27 | 0.04884 | 0.00810 | 0.14074 | 0.02296 | 0.02090 | 0.00069 | 0.00907 | 0.00241 | 140 | 312 | 134 | 20 | 133 | 4 | 182 | 48 | 0.99 |
| GW01-04 | 348 | 199 | 1.75 | 0.04975 | 0.00272 | 0.14429 | 0.00775 | 0.02103 | 0.00035 | 0.00516 | 0.00056 | 183 | 126 | 137 | 7  | 134 | 2 | 104 | 11 | 0.98 |
| GW01-05 | 208 | 82  | 2.54 | 0.05006 | 0.00699 | 0.14418 | 0.01981 | 0.02093 | 0.00059 | 0.00687 | 0.00176 | 198 | 289 | 137 | 18 | 134 | 4 | 138 | 35 | 0.98 |
| GW01-06 | 343 | 154 | 2.23 | 0.04860 | 0.00419 | 0.14239 | 0.01204 | 0.02129 | 0.00045 | 0.00647 | 0.00161 | 129 | 195 | 135 | 11 | 136 | 3 | 130 | 32 | 1.01 |
| GW01-07 | 331 | 174 | 1.90 | 0.04974 | 0.00489 | 0.14215 | 0.01368 | 0.02082 | 0.00051 | 0.00568 | 0.00177 | 183 | 224 | 135 | 12 | 133 | 3 | 114 | 36 | 0.99 |
| GW01-08 | 301 | 120 | 2.51 | 0.04981 | 0.00552 | 0.14212 | 0.01548 | 0.02069 | 0.00051 | 0.00570 | 0.00105 | 186 | 249 | 135 | 14 | 132 | 3 | 115 | 21 | 0.98 |
| GW01-09 | 439 | 217 | 2.02 | 0.04944 | 0.00310 | 0.13991 | 0.00857 | 0.02054 | 0.00038 | 0.00673 | 0.00196 | 169 | 143 | 133 | 8  | 131 | 2 | 136 | 39 | 0.98 |
| GW01-10 | 341 | 101 | 3.37 | 0.04856 | 0.00534 | 0.13884 | 0.01501 | 0.02073 | 0.00048 | 0.00857 | 0.00262 | 127 | 243 | 132 | 13 | 132 | 3 | 172 | 53 | 1.00 |
| GW01-11 | 437 | 201 | 2.17 | 0.04964 | 0.00310 | 0.14177 | 0.00870 | 0.02072 | 0.00036 | 0.00544 | 0.00065 | 178 | 143 | 135 | 8  | 132 | 2 | 110 | 13 | 0.98 |
| GW01-12 | 352 | 192 | 1.83 | 0.04924 | 0.00351 | 0.14162 | 0.00991 | 0.02086 | 0.00041 | 0.00407 | 0.00042 | 159 | 162 | 134 | 9  | 133 | 3 | 82  | 8  | 0.99 |
| GW01-13 | 267 | 167 | 1.60 | 0.04829 | 0.00596 | 0.13925 | 0.01683 | 0.02097 | 0.00063 | 0.00300 | 0.00037 | 114 | 253 | 132 | 15 | 134 | 4 | 61  | 7  | 1.02 |
| GW01-16 | 282 | 152 | 1.85 | 0.04930 | 0.00339 | 0.14191 | 0.00962 | 0.02088 | 0.00036 | 0.00506 | 0.00059 | 162 | 156 | 135 | 9  | 133 | 2 | 102 | 12 | 0.99 |
| GW01-17 | 238 | 124 | 1.92 | 0.04879 | 0.00362 | 0.14078 | 0.01033 | 0.02093 | 0.00036 | 0.00475 | 0.00056 | 138 | 168 | 134 | 9  | 134 | 2 | 96  | 11 | 1.00 |
| GW01-18 | 517 | 323 | 1.60 | 0.04761 | 0.00203 | 0.13774 | 0.00576 | 0.02099 | 0.00031 | 0.00569 | 0.00088 | 80  | 95  | 131 | 5  | 134 | 2 | 115 | 18 | 1.02 |
| GW01-19 | 449 | 167 | 2.69 | 0.04924 | 0.00858 | 0.13868 | 0.02354 | 0.02044 | 0.00086 | 0.00535 | 0.00186 | 159 | 324 | 132 | 21 | 130 | 5 | 108 | 37 | 0.98 |
| GW01-20 | 303 | 160 | 1.90 | 0.04989 | 0.00374 | 0.14125 | 0.01040 | 0.02053 | 0.00039 | 0.00533 | 0.00093 | 190 | 171 | 134 | 9  | 131 | 2 | 107 | 19 | 0.98 |
| GW01-21 | 526 | 205 | 2.56 | 0.04890 | 0.00380 | 0.14047 | 0.01061 | 0.02084 | 0.00044 | 0.00808 | 0.00319 | 143 | 176 | 133 | 9  | 133 | 3 | 163 | 64 | 1.00 |

|         |      |     |      |         |         |         |         |         |         |         |         |     |     |     |    |     |   |     |     |      |
|---------|------|-----|------|---------|---------|---------|---------|---------|---------|---------|---------|-----|-----|-----|----|-----|---|-----|-----|------|
| GW02-01 | 437  | 176 | 2.48 | 0.04964 | 0.00409 | 0.13982 | 0.01126 | 0.02043 | 0.00043 | 0.00765 | 0.00188 | 178 | 187 | 133 | 10 | 130 | 3 | 154 | 38  | 0.98 |
| GW02-02 | 253  | 153 | 1.66 | 0.04853 | 0.00578 | 0.13907 | 0.01623 | 0.02079 | 0.00057 | 0.00676 | 0.00152 | 125 | 252 | 132 | 14 | 133 | 4 | 136 | 31  | 1.01 |
| GW02-03 | 521  | 258 | 2.02 | 0.0495  | 0.00515 | 0.1413  | 0.01431 | 0.02071 | 0.00057 | 0.0058  | 0.00139 | 172 | 233 | 134 | 13 | 132 | 4 | 117 | 28  | 0.99 |
| GW02-04 | 342  | 170 | 2.02 | 0.04865 | 0.00688 | 0.13841 | 0.01913 | 0.02068 | 0.00067 | 0.00669 | 0.00284 | 131 | 284 | 132 | 17 | 132 | 4 | 135 | 57  | 1.00 |
| GW02-05 | 714  | 359 | 1.99 | 0.04866 | 0.00183 | 0.13773 | 0.00512 | 0.02053 | 0.00029 | 0.0044  | 0.00046 | 131 | 87  | 131 | 5  | 131 | 2 | 89  | 9   | 1.00 |
| GW02-06 | 444  | 139 | 3.19 | 0.04739 | 0.00447 | 0.13467 | 0.01248 | 0.02062 | 0.00044 | 0.00545 | 0.00123 | 69  | 209 | 128 | 11 | 132 | 3 | 110 | 25  | 1.03 |
| GW02-07 | 433  | 210 | 2.06 | 0.04933 | 0.00466 | 0.14102 | 0.01295 | 0.02076 | 0.00051 | 0.00585 | 0.00212 | 164 | 214 | 134 | 12 | 132 | 3 | 118 | 43  | 0.99 |
| GW02-08 | 221  | 123 | 1.80 | 0.04891 | 0.00566 | 0.13754 | 0.01562 | 0.0204  | 0.00051 | 0.00594 | 0.00162 | 144 | 250 | 131 | 14 | 130 | 3 | 120 | 33  | 0.99 |
| GW02-09 | 1116 | 366 | 3.05 | 0.05028 | 0.00744 | 0.14154 | 0.02029 | 0.0204  | 0.00085 | 0.00644 | 0.00572 | 208 | 301 | 134 | 18 | 130 | 5 | 130 | 115 | 0.97 |
| GW02-10 | 349  | 199 | 1.76 | 0.04997 | 0.00849 | 0.1397  | 0.02315 | 0.0203  | 0.00084 | 0.00497 | 0.00223 | 194 | 323 | 133 | 21 | 130 | 5 | 100 | 45  | 0.98 |
| GW02-11 | 940  | 500 | 1.88 | 0.04915 | 0.00233 | 0.14182 | 0.00631 | 0.02093 | 0.00044 | 0.00337 | 0.00062 | 155 | 109 | 135 | 6  | 134 | 3 | 68  | 12  | 0.99 |
| GW02-12 | 289  | 144 | 2.01 | 0.04929 | 0.00512 | 0.13959 | 0.0139  | 0.02057 | 0.00066 | 0.00639 | 0.00292 | 162 | 233 | 133 | 12 | 131 | 4 | 129 | 59  | 0.98 |
| GW02-13 | 861  | 226 | 3.82 | 0.04939 | 0.00409 | 0.14036 | 0.01106 | 0.02061 | 0.00059 | 0.00584 | 0.00119 | 166 | 188 | 133 | 10 | 132 | 4 | 118 | 24  | 0.99 |
| GW02-14 | 506  | 222 | 2.28 | 0.0493  | 0.0029  | 0.13992 | 0.00789 | 0.02059 | 0.00043 | 0.00451 | 0.00093 | 162 | 134 | 133 | 7  | 131 | 3 | 91  | 19  | 0.98 |
| GW02-15 | 270  | 134 | 2.01 | 0.04915 | 0.00425 | 0.14036 | 0.01174 | 0.02072 | 0.00053 | 0.00511 | 0.00139 | 155 | 196 | 133 | 10 | 132 | 3 | 103 | 28  | 0.99 |
| GW02-16 | 102  | 54  | 1.90 | 0.04806 | 0.00875 | 0.13992 | 0.02498 | 0.02112 | 0.00079 | 0.00743 | 0.00344 | 102 | 330 | 133 | 22 | 135 | 5 | 150 | 69  | 1.02 |
| GW02-17 | 362  | 197 | 1.84 | 0.04701 | 0.00681 | 0.13786 | 0.01897 | 0.02128 | 0.00102 | 0.00682 | 0.00622 | 50  | 270 | 131 | 17 | 136 | 6 | 137 | 125 | 1.04 |
| GW02-18 | 298  | 153 | 1.95 | 0.04958 | 0.00407 | 0.14165 | 0.01116 | 0.02072 | 0.00054 | 0.00641 | 0.00306 | 175 | 187 | 135 | 10 | 132 | 3 | 129 | 61  | 0.98 |
| GW02-19 | 262  | 119 | 2.19 | 0.04885 | 0.00841 | 0.13891 | 0.02298 | 0.02065 | 0.00105 | 0.00929 | 0.0132  | 141 | 319 | 132 | 20 | 132 | 7 | 187 | 264 | 1.00 |
| GW02-20 | 269  | 127 | 2.11 | 0.04876 | 0.00783 | 0.13922 | 0.02145 | 0.02072 | 0.00099 | 0.01086 | 0.01426 | 136 | 304 | 132 | 19 | 132 | 6 | 218 | 285 | 1.00 |

|          |      |     |      |         |         |         |         |         |         |         |         |     |     |     |    |     |   |     |     |      |
|----------|------|-----|------|---------|---------|---------|---------|---------|---------|---------|---------|-----|-----|-----|----|-----|---|-----|-----|------|
| XST01-06 | 373  | 134 | 2.79 | 0.04881 | 0.00251 | 0.13526 | 0.00687 | 0.02010 | 0.00031 | 0.00616 | 0.00042 | 139 | 117 | 129 | 6  | 128 | 2 | 124 | 8   | 0.99 |
| XST01-08 | 129  | 71  | 1.82 | 0.04985 | 0.00470 | 0.13880 | 0.01289 | 0.02019 | 0.00042 | 0.00715 | 0.00070 | 188 | 214 | 132 | 11 | 129 | 3 | 144 | 14  | 0.98 |
| XST01-09 | 277  | 232 | 1.19 | 0.04937 | 0.00337 | 0.13463 | 0.00894 | 0.01978 | 0.00042 | 0.00822 | 0.00190 | 165 | 155 | 128 | 8  | 126 | 3 | 165 | 38  | 0.98 |
| XST01-10 | 985  | 485 | 2.03 | 0.05307 | 0.00117 | 0.15150 | 0.00337 | 0.02071 | 0.00027 | 0.00664 | 0.00057 | 332 | 51  | 143 | 3  | 132 | 2 | 134 | 11  | 0.92 |
| XST01-11 | 153  | 107 | 1.43 | 0.04891 | 0.00358 | 0.13433 | 0.00970 | 0.01992 | 0.00036 | 0.00681 | 0.00056 | 144 | 166 | 128 | 9  | 127 | 2 | 137 | 11  | 0.99 |
| XST01-12 | 162  | 132 | 1.23 | 0.04974 | 0.00525 | 0.13748 | 0.01418 | 0.02004 | 0.00054 | 0.00659 | 0.00084 | 183 | 237 | 131 | 13 | 128 | 3 | 133 | 17  | 0.98 |
| XST01-13 | 144  | 91  | 1.58 | 0.04951 | 0.00367 | 0.13781 | 0.01006 | 0.02019 | 0.00036 | 0.00717 | 0.00070 | 172 | 169 | 131 | 9  | 129 | 2 | 144 | 14  | 0.98 |
| XST01-14 | 433  | 181 | 2.40 | 0.04761 | 0.00957 | 0.13358 | 0.02612 | 0.02035 | 0.00100 | 0.01269 | 0.00684 | 80  | 354 | 127 | 23 | 130 | 6 | 255 | 137 | 1.02 |
| XST01-15 | 641  | 237 | 2.71 | 0.04728 | 0.00404 | 0.13165 | 0.01094 | 0.02020 | 0.00049 | 0.00737 | 0.00142 | 63  | 192 | 126 | 10 | 129 | 3 | 148 | 28  | 1.02 |
| XST01-16 | 296  | 131 | 2.26 | 0.04945 | 0.00365 | 0.13459 | 0.00971 | 0.01974 | 0.00039 | 0.00787 | 0.00125 | 169 | 168 | 128 | 9  | 126 | 2 | 158 | 25  | 0.98 |
| XST01-17 | 139  | 136 | 1.02 | 0.04833 | 0.00861 | 0.13268 | 0.02299 | 0.01990 | 0.00087 | 0.00907 | 0.00315 | 115 | 327 | 127 | 21 | 127 | 5 | 182 | 63  | 1.00 |
| XST01-18 | 646  | 257 | 2.51 | 0.04883 | 0.00214 | 0.13292 | 0.00567 | 0.01974 | 0.00030 | 0.00940 | 0.00193 | 140 | 101 | 127 | 5  | 126 | 2 | 189 | 39  | 0.99 |
| XST01-19 | 469  | 303 | 1.55 | 0.04969 | 0.00240 | 0.13674 | 0.00640 | 0.01996 | 0.00034 | 0.00795 | 0.00145 | 181 | 112 | 130 | 6  | 127 | 2 | 160 | 29  | 0.98 |
| XST01-20 | 313  | 103 | 3.05 | 0.04838 | 0.00403 | 0.13461 | 0.01100 | 0.02018 | 0.00041 | 0.00851 | 0.00172 | 118 | 188 | 128 | 10 | 129 | 3 | 171 | 34  | 1.01 |
| XST01-21 | 220  | 70  | 3.16 | 0.04803 | 0.00711 | 0.13257 | 0.01927 | 0.02002 | 0.00062 | 0.00913 | 0.00244 | 101 | 285 | 126 | 17 | 128 | 4 | 184 | 49  | 1.02 |
|          |      |     |      |         |         |         |         |         |         |         |         |     |     |     |    |     |   |     |     |      |
| XST02-01 | 331  | 198 | 1.67 | 0.04904 | 0.00284 | 0.13553 | 0.00770 | 0.02005 | 0.00036 | 0.00624 | 0.00046 | 150 | 132 | 129 | 7  | 128 | 2 | 126 | 9   | 0.99 |
| XST02-02 | 154  | 139 | 1.11 | 0.04873 | 0.00299 | 0.13473 | 0.00810 | 0.02006 | 0.00035 | 0.00651 | 0.00056 | 135 | 139 | 128 | 7  | 128 | 2 | 131 | 11  | 1.00 |
| XST02-03 | 238  | 200 | 1.19 | 0.04884 | 0.00400 | 0.13455 | 0.01069 | 0.01998 | 0.00047 | 0.00684 | 0.00101 | 140 | 185 | 128 | 10 | 128 | 3 | 138 | 20  | 1.00 |
| XST02-04 | 109  | 98  | 1.12 | 0.04832 | 0.00464 | 0.13525 | 0.01272 | 0.02030 | 0.00047 | 0.00786 | 0.00107 | 115 | 214 | 129 | 11 | 130 | 3 | 158 | 21  | 1.01 |
| XST02-05 | 341  | 261 | 1.31 | 0.04825 | 0.00327 | 0.13591 | 0.00894 | 0.02043 | 0.00043 | 0.00601 | 0.00079 | 112 | 152 | 129 | 8  | 130 | 3 | 121 | 16  | 1.01 |
| XST02-06 | 345  | 243 | 1.42 | 0.04769 | 0.00163 | 0.13279 | 0.00451 | 0.02020 | 0.00028 | 0.00629 | 0.00046 | 84  | 77  | 127 | 4  | 129 | 2 | 127 | 9   | 1.02 |
| XST02-08 | 212  | 153 | 1.38 | 0.04988 | 0.00673 | 0.13968 | 0.01831 | 0.02032 | 0.00073 | 0.00623 | 0.00132 | 189 | 281 | 133 | 16 | 130 | 5 | 126 | 27  | 0.98 |
| XST02-09 | 149  | 123 | 1.21 | 0.04921 | 0.00410 | 0.13770 | 0.01122 | 0.02030 | 0.00045 | 0.00599 | 0.00080 | 158 | 189 | 131 | 10 | 130 | 3 | 121 | 16  | 0.99 |
| XST02-10 | 207  | 226 | 0.91 | 0.04885 | 0.00573 | 0.13570 | 0.01544 | 0.02023 | 0.00067 | 0.00706 | 0.00193 | 141 | 248 | 129 | 14 | 129 | 4 | 142 | 39  | 1.00 |
| XST02-11 | 194  | 139 | 1.40 | 0.05396 | 0.00594 | 0.14702 | 0.01568 | 0.01977 | 0.00060 | 0.00617 | 0.00107 | 369 | 251 | 139 | 14 | 126 | 4 | 124 | 21  | 0.91 |
| XST02-12 | 154  | 135 | 1.14 | 0.04779 | 0.00524 | 0.13153 | 0.01407 | 0.01996 | 0.00055 | 0.00746 | 0.00126 | 89  | 231 | 125 | 13 | 127 | 3 | 150 | 25  | 1.02 |
| XST02-13 | 666  | 556 | 1.20 | 0.04865 | 0.00105 | 0.13629 | 0.00297 | 0.02033 | 0.00026 | 0.00615 | 0.00041 | 131 | 52  | 130 | 3  | 130 | 2 | 124 | 8   | 1.00 |
| XST02-14 | 242  | 184 | 1.32 | 0.05012 | 0.00496 | 0.13762 | 0.01323 | 0.01992 | 0.00055 | 0.00745 | 0.00138 | 201 | 225 | 131 | 12 | 127 | 3 | 150 | 28  | 0.97 |
| XST02-15 | 420  | 335 | 1.25 | 0.04869 | 0.00365 | 0.13553 | 0.00980 | 0.02021 | 0.00048 | 0.00584 | 0.00124 | 133 | 169 | 129 | 9  | 129 | 3 | 118 | 25  | 1.00 |
| XST02-16 | 348  | 209 | 1.66 | 0.04853 | 0.00193 | 0.13561 | 0.00532 | 0.02027 | 0.00029 | 0.00660 | 0.00055 | 125 | 92  | 129 | 5  | 129 | 2 | 133 | 11  | 1.00 |
| XST02-17 | 324  | 208 | 1.56 | 0.04938 | 0.00329 | 0.13541 | 0.00880 | 0.01991 | 0.00041 | 0.00621 | 0.00080 | 166 | 151 | 129 | 8  | 127 | 3 | 125 | 16  | 0.98 |
| XST02-18 | 111  | 97  | 1.14 | 0.04904 | 0.00449 | 0.13637 | 0.01222 | 0.02017 | 0.00045 | 0.00796 | 0.00126 | 150 | 208 | 130 | 11 | 129 | 3 | 160 | 25  | 0.99 |
| XST02-19 | 288  | 167 | 1.72 | 0.05024 | 0.00471 | 0.13957 | 0.01271 | 0.02015 | 0.00052 | 0.00652 | 0.00120 | 206 | 214 | 133 | 11 | 129 | 3 | 131 | 24  | 0.97 |
| XST02-20 | 149  | 139 | 1.07 | 0.04704 | 0.00579 | 0.13195 | 0.01579 | 0.02035 | 0.00064 | 0.00588 | 0.00135 | 51  | 245 | 126 | 14 | 130 | 4 | 118 | 27  | 1.03 |
| XST02-21 | 238  | 167 | 1.42 | 0.04800 | 0.00529 | 0.13325 | 0.01429 | 0.02014 | 0.00059 | 0.00608 | 0.00130 | 99  | 235 | 127 | 13 | 129 | 4 | 123 | 26  | 1.02 |
|          |      |     |      |         |         |         |         |         |         |         |         |     |     |     |    |     |   |     |     |      |
| XST03-01 | 161  | 114 | 1.42 | 0.04844 | 0.00305 | 0.13692 | 0.00850 | 0.02050 | 0.00035 | 0.00724 | 0.00057 | 121 | 142 | 130 | 8  | 131 | 2 | 146 | 11  | 1.01 |
| XST03-02 | 298  | 195 | 1.53 | 0.04901 | 0.00268 | 0.13815 | 0.00737 | 0.02045 | 0.00035 | 0.00782 | 0.00085 | 148 | 125 | 131 | 7  | 130 | 2 | 157 | 17  | 0.99 |
| XST03-03 | 248  | 199 | 1.25 | 0.04969 | 0.00617 | 0.13895 | 0.01670 | 0.02029 | 0.00069 | 0.00655 | 0.00121 | 181 | 264 | 132 | 15 | 129 | 4 | 132 | 24  | 0.98 |
| XST03-04 | 455  | 225 | 2.02 | 0.04997 | 0.00202 | 0.13976 | 0.00553 | 0.02029 | 0.00030 | 0.00704 | 0.00066 | 194 | 96  | 133 | 5  | 129 | 2 | 142 | 13  | 0.97 |
| XST03-05 | 172  | 135 | 1.27 | 0.04960 | 0.00300 | 0.13945 | 0.00825 | 0.02039 | 0.00036 | 0.00685 | 0.00072 | 176 | 138 | 133 | 7  | 130 | 2 | 138 | 14  | 0.98 |
| XST03-06 | 246  | 185 | 1.33 | 0.04776 | 0.00200 | 0.13564 | 0.00561 | 0.02060 | 0.00030 | 0.00643 | 0.00050 | 87  | 94  | 129 | 5  | 131 | 2 | 130 | 10  | 1.02 |
| XST03-07 | 393  | 193 | 2.03 | 0.04931 | 0.00200 | 0.13860 | 0.00554 | 0.02039 | 0.00030 | 0.00621 | 0.00052 | 163 | 95  | 132 | 5  | 130 | 2 | 125 | 10  | 0.98 |
| XST03-08 | 158  | 113 | 1.40 | 0.04791 | 0.00398 | 0.13655 | 0.01110 | 0.02067 | 0.00044 | 0.00717 | 0.00114 | 95  | 187 | 130 | 10 | 132 | 3 | 144 | 23  | 1.02 |
| XST03-09 | 203  | 177 | 1.15 | 0.04986 | 0.00711 | 0.13942 | 0.01920 | 0.02028 | 0.00079 | 0.00610 | 0.00169 | 188 | 292 | 133 | 17 | 129 | 5 | 123 | 34  | 0.97 |
| XST03-10 | 163  | 128 | 1.27 | 0.04974 | 0.00455 | 0.13995 | 0.01243 | 0.02041 | 0.00051 | 0.00603 | 0.00113 | 183 | 208 | 133 | 11 | 130 | 3 | 122 | 23  | 0.98 |
| XST03-11 | 763  | 355 | 2.15 | 0.04986 | 0.00271 | 0.13944 | 0.00732 | 0.02029 | 0.00038 | 0.00643 | 0.00090 | 188 | 126 | 133 | 7  | 129 | 2 | 130 | 18  | 0.97 |
| XST03-12 | 223  | 143 | 1.57 | 0.04849 | 0.00720 | 0.13637 | 0.01972 | 0.02041 | 0.00075 | 0.00602 | 0.00140 | 123 | 289 | 130 | 18 | 130 | 5 | 121 | 28  | 1.00 |
| XST03-13 | 202  | 196 | 1.03 | 0.04776 | 0.00233 | 0.13455 | 0.00643 | 0.02043 | 0.00033 | 0.00656 | 0.00066 | 87  | 109 | 128 | 6  | 130 | 2 | 132 | 13  | 1.02 |
| XST03-14 | 1070 | 562 | 1.90 | 0.04686 | 0.00111 | 0.13439 | 0.00317 | 0.02080 | 0.00026 | 0.00654 | 0.00052 | 42  | 52  | 128 | 3  | 133 | 2 | 132 | 10  | 1.04 |
| XST03-15 | 209  | 105 | 1.99 | 0.04807 | 0.      |         |         |         |         |         |         |     |     |     |    |     |   |     |     |      |

|          |      |      |      |         |         |         |         |         |         |         |         |     |     |     |   |     |   |     |    |      |
|----------|------|------|------|---------|---------|---------|---------|---------|---------|---------|---------|-----|-----|-----|---|-----|---|-----|----|------|
| JLP01-10 | 367  | 211  | 1.73 | 0.05025 | 0.00265 | 0.13202 | 0.00687 | 0.01906 | 0.00038 | 0.00536 | 0.00071 | 207 | 122 | 126 | 6 | 122 | 2 | 108 | 14 | 0.97 |
| JLP01-11 | 1019 | 406  | 2.51 | 0.05029 | 0.00186 | 0.13204 | 0.00492 | 0.01905 | 0.00034 | 0.00526 | 0.00047 | 208 | 88  | 126 | 4 | 122 | 2 | 106 | 9  | 0.97 |
| JLP01-12 | 1290 | 660  | 1.95 | 0.05026 | 0.00241 | 0.12763 | 0.00606 | 0.01842 | 0.00038 | 0.00543 | 0.00070 | 207 | 112 | 122 | 5 | 118 | 2 | 109 | 14 | 0.97 |
| JLP01-13 | 428  | 428  | 1.00 | 0.04900 | 0.00391 | 0.12473 | 0.00963 | 0.01845 | 0.00050 | 0.00532 | 0.00120 | 148 | 181 | 119 | 9 | 118 | 3 | 107 | 24 | 0.99 |
| JLP01-14 | 713  | 380  | 1.88 | 0.05116 | 0.00179 | 0.13160 | 0.00470 | 0.01866 | 0.00033 | 0.00530 | 0.00047 | 248 | 82  | 126 | 4 | 119 | 2 | 107 | 9  | 0.94 |
| JLP01-15 | 708  | 514  | 1.38 | 0.04709 | 0.00287 | 0.12331 | 0.00738 | 0.01900 | 0.00044 | 0.00591 | 0.00095 | 54  | 134 | 118 | 7 | 121 | 3 | 119 | 19 | 1.03 |
| JLP01-16 | 137  | 160  | 0.86 | 0.04817 | 0.00357 | 0.12632 | 0.00926 | 0.01903 | 0.00042 | 0.00537 | 0.00063 | 108 | 167 | 121 | 8 | 122 | 3 | 108 | 13 | 1.01 |
| JLP01-17 | 1975 | 1124 | 1.76 | 0.04980 | 0.00149 | 0.12923 | 0.00404 | 0.01882 | 0.00034 | 0.00568 | 0.00068 | 186 | 71  | 123 | 4 | 120 | 2 | 114 | 14 | 0.98 |
| JLP01-18 | 1284 | 800  | 1.61 | 0.04938 | 0.00177 | 0.13256 | 0.00481 | 0.01948 | 0.00036 | 0.00570 | 0.00077 | 166 | 85  | 126 | 4 | 124 | 2 | 115 | 15 | 0.98 |
| JLP01-19 | 1149 | 784  | 1.47 | 0.05056 | 0.00158 | 0.13098 | 0.00421 | 0.01879 | 0.00033 | 0.00570 | 0.00073 | 221 | 74  | 125 | 4 | 120 | 2 | 115 | 15 | 0.96 |
| JLP01-20 | 838  | 536  | 1.56 | 0.04956 | 0.00208 | 0.13019 | 0.00549 | 0.01906 | 0.00037 | 0.00594 | 0.00085 | 174 | 98  | 124 | 5 | 122 | 2 | 120 | 17 | 0.98 |
| JLP01-22 | 345  | 280  | 1.23 | 0.04936 | 0.00263 | 0.13051 | 0.00689 | 0.01918 | 0.00039 | 0.00629 | 0.00106 | 165 | 122 | 125 | 6 | 122 | 2 | 127 | 21 | 0.98 |
| JLP01-23 | 903  | 791  | 1.14 | 0.04943 | 0.00166 | 0.12930 | 0.00445 | 0.01897 | 0.00034 | 0.00615 | 0.00107 | 168 | 80  | 123 | 4 | 121 | 2 | 124 | 21 | 0.98 |

#### N5, Xianju (Li CL et al., 2014)

|              |     |     |      |  |  |         |         |         |         |  |  |  |  |  |  |     |    |  |  |  |
|--------------|-----|-----|------|--|--|---------|---------|---------|---------|--|--|--|--|--|--|-----|----|--|--|--|
| DY11-13-3-1  | 64  | 41  | 1.55 |  |  | 0.17434 | 0.00430 | 0.02262 | 0.00107 |  |  |  |  |  |  | 144 | 7  |  |  |  |
| DY11-13-3-2  | 113 | 97  | 1.16 |  |  | 0.16372 | 0.00207 | 0.02240 | 0.00158 |  |  |  |  |  |  | 143 | 10 |  |  |  |
| DY11-13-3-3  | 178 | 91  | 1.95 |  |  | 0.15186 | 0.00974 | 0.02243 | 0.00110 |  |  |  |  |  |  | 143 | 7  |  |  |  |
| DY11-13-3-4  | 94  | 64  | 1.46 |  |  | 0.15681 | 0.00430 | 0.02232 | 0.00043 |  |  |  |  |  |  | 142 | 3  |  |  |  |
| DY11-13-3-5  | 82  | 62  | 1.31 |  |  | 0.14352 | 0.00613 | 0.02237 | 0.00050 |  |  |  |  |  |  | 143 | 3  |  |  |  |
| DY11-13-3-6  | 78  | 78  | 1.00 |  |  | 0.39305 | 0.04927 | 0.02265 | 0.00089 |  |  |  |  |  |  | 144 | 6  |  |  |  |
| DY11-13-3-7  | 275 | 105 | 2.62 |  |  | 0.28596 | 0.04244 | 0.02332 | 0.00410 |  |  |  |  |  |  | 149 | 26 |  |  |  |
| DY11-13-3-8  | 108 | 73  | 1.49 |  |  | 0.16640 | 0.00780 | 0.02259 | 0.00078 |  |  |  |  |  |  | 144 | 5  |  |  |  |
| DY11-13-3-9  | 29  | 20  | 1.42 |  |  | 0.14843 | 0.01618 | 0.02259 | 0.00186 |  |  |  |  |  |  | 144 | 12 |  |  |  |
| DY11-13-3-10 | 15  | 23  | 0.66 |  |  | 0.15874 | 0.01420 | 0.02157 | 0.00084 |  |  |  |  |  |  | 138 | 5  |  |  |  |
| DY11-13-3-11 | 140 | 84  | 1.66 |  |  | 0.15703 | 0.02945 | 0.02273 | 0.00219 |  |  |  |  |  |  | 145 | 14 |  |  |  |
| DY11-13-3-12 | 143 | 103 | 1.38 |  |  | 0.15254 | 0.00526 | 0.02241 | 0.00065 |  |  |  |  |  |  | 143 | 4  |  |  |  |
| DY11-13-3-13 | 21  | 15  | 1.39 |  |  | 0.17555 | 0.01251 | 0.02132 | 0.00174 |  |  |  |  |  |  | 136 | 11 |  |  |  |
| DY11-13-3-14 | 87  | 77  | 1.13 |  |  | 0.16745 | 0.01082 | 0.02267 | 0.00123 |  |  |  |  |  |  | 144 | 8  |  |  |  |
| DY11-13-3-15 | 21  | 17  | 1.19 |  |  | 0.16513 | 0.02681 | 0.02208 | 0.00088 |  |  |  |  |  |  | 141 | 6  |  |  |  |
| DY11-13-3-16 | 74  | 33  | 2.23 |  |  | 0.18204 | 0.06369 | 0.02327 | 0.00316 |  |  |  |  |  |  | 148 | 20 |  |  |  |
| DY11-13-3-17 | 175 | 76  | 2.29 |  |  | 0.16915 | 0.01576 | 0.02311 | 0.00115 |  |  |  |  |  |  | 147 | 7  |  |  |  |
| DY11-13-3-18 | 59  | 29  | 2.02 |  |  | 0.36372 | 0.01074 | 0.02219 | 0.00121 |  |  |  |  |  |  | 141 | 8  |  |  |  |
| DY11-13-3-19 | 36  | 24  | 1.52 |  |  | 0.15098 | 0.03940 | 0.02234 | 0.00218 |  |  |  |  |  |  | 142 | 14 |  |  |  |
| DY11-13-3-20 | 31  | 41  | 0.75 |  |  | 0.17230 | 0.02986 | 0.02312 | 0.00096 |  |  |  |  |  |  | 147 | 6  |  |  |  |
|              |     |     |      |  |  |         |         |         |         |  |  |  |  |  |  |     |    |  |  |  |
| DY11-63-3-1  | 42  | 50  | 0.86 |  |  | 0.15304 | 0.01935 | 0.02220 | 0.00061 |  |  |  |  |  |  | 142 | 4  |  |  |  |
| DY11-63-3-2  | 68  | 59  | 1.15 |  |  | 0.15978 | 0.00855 | 0.02242 | 0.00042 |  |  |  |  |  |  | 143 | 3  |  |  |  |
| DY11-63-3-3  | 167 | 152 | 1.10 |  |  | 0.14564 | 0.00500 | 0.02206 | 0.00030 |  |  |  |  |  |  | 141 | 2  |  |  |  |
| DY11-63-3-4  | 47  | 45  | 1.05 |  |  | 0.13629 | 0.04208 | 0.01919 | 0.00032 |  |  |  |  |  |  | 123 | 2  |  |  |  |
| DY11-63-3-5  | 299 | 288 | 1.04 |  |  | 0.15930 | 0.00323 | 0.02197 | 0.00024 |  |  |  |  |  |  | 140 | 2  |  |  |  |
| DY11-63-3-6  | 110 | 135 | 0.81 |  |  | 0.17077 | 0.01946 | 0.02075 | 0.00047 |  |  |  |  |  |  | 132 | 3  |  |  |  |
| DY11-63-3-7  | 71  | 51  | 1.40 |  |  | 0.15227 | 0.01184 | 0.02191 | 0.00076 |  |  |  |  |  |  | 140 | 5  |  |  |  |
| DY11-63-3-8  | 90  | 92  | 0.98 |  |  | 0.16095 | 0.01219 | 0.02163 | 0.00041 |  |  |  |  |  |  | 138 | 3  |  |  |  |
| DY11-63-3-9  | 57  | 50  | 1.14 |  |  | 0.18277 | 0.04004 | 0.02242 | 0.00014 |  |  |  |  |  |  | 143 | 1  |  |  |  |
| DY11-63-3-10 | 152 | 177 | 0.85 |  |  | 0.16258 | 0.00603 | 0.02191 | 0.00053 |  |  |  |  |  |  | 140 | 3  |  |  |  |
| DY11-63-3-11 | 73  | 92  | 0.80 |  |  | 0.28593 | 0.00808 | 0.02183 | 0.00017 |  |  |  |  |  |  | 139 | 1  |  |  |  |
| DY11-63-3-12 | 84  | 66  | 1.26 |  |  | 0.14287 | 0.01338 | 0.02193 | 0.00054 |  |  |  |  |  |  | 140 | 3  |  |  |  |
| DY11-63-3-13 | 165 | 106 | 1.56 |  |  | 0.18102 | 0.00835 | 0.02311 | 0.00075 |  |  |  |  |  |  | 147 | 5  |  |  |  |
| DY11-63-3-14 | 559 | 312 | 1.79 |  |  | 0.16094 | 0.00239 | 0.02203 | 0.00027 |  |  |  |  |  |  | 140 | 2  |  |  |  |
| DY11-63-3-15 | 44  | 39  | 1.13 |  |  | 0.24096 | 0.03721 | 0.02474 | 0.00063 |  |  |  |  |  |  | 158 | 4  |  |  |  |
| DY11-63-3-16 | 77  | 60  | 1.28 |  |  | 0.19034 | 0.03161 | 0.02153 | 0.00112 |  |  |  |  |  |  | 137 | 7  |  |  |  |
| DY11-63-3-17 | 149 | 123 | 1.21 |  |  | 0.32551 | 0.11490 | 0.02261 | 0.00181 |  |  |  |  |  |  | 144 | 11 |  |  |  |
| DY11-63-3-18 | 651 | 310 | 2.10 |  |  | 0.16626 | 0.00648 | 0.02246 | 0.00037 |  |  |  |  |  |  | 143 | 2  |  |  |  |
| DY11-63-3-19 | 130 | 75  | 1.74 |  |  | 0.32049 | 0.03430 | 0.02429 | 0.00123 |  |  |  |  |  |  | 155 | 8  |  |  |  |
| DY11-63-3-20 | 38  | 20  | 1.91 |  |  | 0.46167 | 0.03380 | 0.02494 | 0.00121 |  |  |  |  |  |  | 159 | 8  |  |  |  |

#### N6, Qingyuan (Duan et al., 2013)

|              |     |     |      |        |        |        |        |        |        |  |  |  |     |    |     |   |  |  |      |
|--------------|-----|-----|------|--------|--------|--------|--------|--------|--------|--|--|--|-----|----|-----|---|--|--|------|
| 117QY-1-1-1  | 272 | 176 | 1.55 | 0.0519 | 0.0031 | 0.1495 | 0.0092 | 0.0212 | 0.0006 |  |  |  | 141 | 8  | 135 | 4 |  |  | 0.96 |
| 117QY-1-1-2  | 149 | 221 | 0.68 | 0.054  | 0.003  | 0.1579 | 0.0094 | 0.0214 | 0.0006 |  |  |  | 149 | 8  | 136 | 4 |  |  | 0.91 |
| 117QY-1-1-3  | 630 | 282 | 2.24 | 0.0474 | 0.0024 | 0.139  | 0.0078 | 0.0214 | 0.0006 |  |  |  | 132 | 7  | 137 | 4 |  |  | 1.04 |
| 117QY-1-1-4  | 866 | 290 | 2.98 | 0.0505 | 0.003  | 0.1472 | 0.009  | 0.0212 | 0.0006 |  |  |  | 139 | 8  | 135 | 4 |  |  | 0.97 |
| 117QY-1-1-5  | 430 | 170 | 2.53 | 0.0488 | 0.003  | 0.1412 | 0.009  | 0.0213 | 0.0006 |  |  |  | 134 | 8  | 136 | 4 |  |  | 1.01 |
| 117QY-1-1-6  | 212 | 330 | 0.64 | 0.0574 | 0.0038 | 0.1695 | 0.0116 | 0.0215 | 0.0006 |  |  |  | 159 | 10 | 137 | 4 |  |  | 0.86 |
| 117QY-1-1-7  | 244 | 127 | 1.92 | 0.0543 | 0.0038 | 0.1563 | 0.0118 | 0.0208 | 0.0006 |  |  |  | 147 | 10 | 133 | 4 |  |  | 0.90 |
| 117QY-1-1-8  | 360 | 264 | 1.36 | 0.0495 | 0.0027 | 0.1452 | 0.0084 | 0.0215 | 0.0006 |  |  |  | 138 | 7  | 137 | 4 |  |  | 0.99 |
| 117QY-1-1-9  | 440 | 190 | 2.31 | 0.0473 | 0.0025 | 0.136  | 0.0079 | 0.0212 | 0.0006 |  |  |  | 129 | 7  | 135 | 4 |  |  | 1.05 |
| 117QY-1-1-10 | 194 | 210 | 0.92 | 0.047  | 0.0029 | 0.1379 | 0.0088 | 0.0216 | 0.0007 |  |  |  | 131 | 8  | 138 | 4 |  |  | 1.05 |
| 117QY-1-1-11 | 503 | 213 | 2.36 | 0.0519 | 0.0028 | 0.1515 | 0.0093 | 0.0212 | 0.0006 |  |  |  | 143 | 8  | 135 | 4 |  |  | 0.94 |
| 117QY-1-1-12 | 162 | 149 | 1.09 | 0.0605 | 0.0043 | 0.1762 | 0.0135 | 0.0214 | 0.0007 |  |  |  | 165 | 12 | 137 | 4 |  |  | 0.83 |
| 117QY-1-1-13 | 254 | 194 | 1.31 | 0.0534 | 0.003  | 0.1531 | 0.0099 | 0.0213 | 0.0006 |  |  |  | 145 | 9  | 136 | 4 |  |  | 0.94 |
| 117QY-1-1-14 | 416 | 291 | 1.43 | 0.0492 | 0.0027 | 0.1378 | 0.0086 | 0.0211 | 0.0006 |  |  |  | 131 | 8  | 134 | 4 |  |  | 1.02 |
| 117QY-1-1-15 | 360 | 163 | 2.22 | 0.0554 | 0.0035 | 0.1597 | 0.0111 | 0.0214 | 0.0006 |  |  |  | 150 | 10 | 136 | 4 |  |  | 0.91 |
| 117QY-1-1-16 | 388 | 202 | 1.92 | 0.0508 | 0.0026 | 0.1478 | 0.0089 | 0.0214 | 0.0006 |  |  |  | 140 | 8  | 137 | 4 |  |  | 0.98 |
| 117QY-1-1-17 | 239 | 186 | 1.29 | 0.0527 | 0.0027 | 0.1534 | 0.0096 | 0.0213 | 0.0006 |  |  |  | 145 | 8  | 136 | 4 |  |  | 0.94 |
| 117QY-1-1-18 | 206 | 277 | 0.74 | 0.0483 | 0.0027 | 0.1418 | 0.0095 | 0.0213 | 0.0006 |  |  |  | 135 | 8  | 136 | 4 |  |  | 1.01 |
| 117QY-1-1-19 | 366 | 200 | 1.83 | 0.0508 | 0.0033 | 0.1544 | 0.0123 | 0.0215 | 0.0006 |  |  |  | 146 | 11 | 137 | 4 |  |  | 0.94 |
| 117QY-1-1-20 | 515 | 277 | 1.86 | 0.0466 | 0.0022 | 0.1393 | 0.0092 | 0.0214 | 0.0006 |  |  |  | 132 | 8  | 137 | 4 |  |  | 1.04 |
| 117QY-1-1-21 | 605 | 433 | 1.4  | 0.0479 | 0.0022 | 0.1427 | 0.0096 | 0.0215 | 0.0006 |  |  |  | 135 | 8  | 137 | 4 |  |  | 1.01 |
| 117QY-1-1-22 | 307 | 167 | 1.85 | 0.05   | 0.0039 | 0.1488 | 0.0143 | 0.0213 | 0.0007 |  |  |  | 141 | 13 | 136 | 4 |  |  | 0.96 |
| 117QY-1-1-23 | 648 | 379 | 1.71 | 0.0556 | 0.0026 | 0.162  | 0.0111 | 0.021  | 0.0006 |  |  |  | 152 | 10 | 134 | 4 |  |  | 0.88 |
| 117QY-1-1-24 | 880 | 282 | 3.12 | 0.045  | 0.0023 | 0.13   | 0.0086 | 0.0212 | 0.0006 |  |  |  | 124 | 8  | 135 | 4 |  |  | 1.09 |
| 117QY-1-1-25 | 331 | 195 | 1.69 | 0.0433 | 0.0023 | 0.1323 | 0.0092 | 0.0218 | 0.0006 |  |  |  | 126 | 8  | 139 | 4 |  |  | 1.10 |
|              |     |     |      |        |        |        |        |        |        |  |  |  |     |    |     |   |  |  |      |
| 117QY-3-1-1  | 655 | 603 | 1.09 | 0.0504 | 0.0017 | 0.1479 | 0.0079 | 0.0213 | 0.0002 |  |  |  | 140 | 7  | 136 | 1 |  |  | 0.97 |

|               |      |      |      |        |        |        |        |        |        |     |    |     |   |      |
|---------------|------|------|------|--------|--------|--------|--------|--------|--------|-----|----|-----|---|------|
| 117QY-3-1-2   | 271  | 234  | 1.16 | 0.0485 | 0.0025 | 0.136  | 0.0085 | 0.0206 | 0.0003 | 129 | 8  | 132 | 2 | 1.02 |
| 117QY-3-1-3   | 375  | 272  | 1.38 | 0.0539 | 0.0024 | 0.1539 | 0.0086 | 0.0208 | 0.0002 | 145 | 8  | 133 | 1 | 0.92 |
| 117QY-3-1-4   | 189  | 198  | 0.95 | 0.0523 | 0.0025 | 0.1503 | 0.0094 | 0.0208 | 0.0003 | 142 | 8  | 133 | 2 | 0.94 |
| 117QY-3-1-5   | 310  | 686  | 0.45 | 0.0477 | 0.0014 | 0.1364 | 0.0059 | 0.0208 | 0.0002 | 130 | 5  | 132 | 1 | 1.02 |
| 117QY-3-1-6   | 204  | 364  | 0.56 | 0.0536 | 0.002  | 0.1523 | 0.0076 | 0.0206 | 0.0002 | 144 | 7  | 132 | 2 | 0.92 |
| 117QY-3-1-7   | 354  | 275  | 1.28 | 0.0522 | 0.0021 | 0.1481 | 0.0075 | 0.0207 | 0.0002 | 140 | 7  | 132 | 1 | 0.94 |
| 117QY-3-1-8   | 179  | 282  | 0.63 | 0.0509 | 0.0024 | 0.1448 | 0.008  | 0.0208 | 0.0003 | 137 | 7  | 133 | 2 | 0.97 |
| 117QY-3-1-9   | 398  | 298  | 1.34 | 0.0524 | 0.002  | 0.1476 | 0.0093 | 0.0207 | 0.0003 | 140 | 8  | 132 | 2 | 0.94 |
| 117QY-3-1-10  | 201  | 186  | 1.08 | 0.0471 | 0.0027 | 0.1357 | 0.0117 | 0.0211 | 0.0003 | 129 | 10 | 135 | 2 | 1.05 |
| 117QY-3-1-11  | 266  | 434  | 0.61 | 0.0465 | 0.0022 | 0.137  | 0.0121 | 0.0214 | 0.0003 | 130 | 11 | 137 | 2 | 1.05 |
| 117QY-3-1-12  | 241  | 188  | 1.29 | 0.0454 | 0.0023 | 0.1311 | 0.0131 | 0.0211 | 0.0004 | 125 | 12 | 135 | 2 | 1.08 |
| 117QY-3-1-13  | 266  | 552  | 0.48 | 0.0466 | 0.0013 | 0.1333 | 0.0134 | 0.0209 | 0.0002 | 127 | 12 | 133 | 1 | 1.05 |
| 117QY-3-1-14  | 238  | 195  | 1.22 | 0.0454 | 0.0024 | 0.1278 | 0.0119 | 0.021  | 0.0003 | 122 | 11 | 134 | 2 | 1.10 |
| 117QY-3-1-15  | 337  | 379  | 0.89 | 0.0465 | 0.0025 | 0.1348 | 0.0114 | 0.0209 | 0.0004 | 128 | 10 | 134 | 2 | 1.05 |
| 117QY-3-1-16  | 122  | 169  | 0.72 | 0.0511 | 0.0031 | 0.1428 | 0.0107 | 0.0209 | 0.0004 | 136 | 9  | 133 | 3 | 0.98 |
| 117QY-3-1-17  | 497  | 365  | 1.36 | 0.0491 | 0.0019 | 0.1411 | 0.007  | 0.0209 | 0.0004 | 134 | 6  | 133 | 2 | 0.99 |
| 117QY-3-1-18  | 219  | 177  | 1.23 | 0.0473 | 0.0031 | 0.1369 | 0.009  | 0.0213 | 0.0005 | 130 | 8  | 136 | 3 | 1.05 |
| 117QY-3-1-19  | 310  | 446  | 0.69 | 0.0498 | 0.002  | 0.1448 | 0.006  | 0.021  | 0.0004 | 137 | 5  | 134 | 3 | 0.98 |
| 117QY-3-1-20  | 523  | 488  | 1.07 | 0.0543 | 0.0018 | 0.1557 | 0.0053 | 0.0205 | 0.0004 | 147 | 5  | 131 | 3 | 0.89 |
| 117QY-3-1-21  | 227  | 229  | 0.99 | 0.0551 | 0.0028 | 0.1587 | 0.0088 | 0.0208 | 0.0006 | 150 | 8  | 132 | 4 | 0.88 |
| 117QY-3-1-22  | 862  | 518  | 1.66 | 0.0474 | 0.0019 | 0.1364 | 0.0053 | 0.0208 | 0.0006 | 130 | 5  | 133 | 4 | 1.02 |
| 117QY-3-1-23  | 417  | 978  | 0.43 | 0.0501 | 0.002  | 0.1457 | 0.0066 | 0.0213 | 0.0008 | 138 | 6  | 136 | 5 | 0.99 |
| 117QY-3-1-24  | 378  | 361  | 1.05 | 0.0477 | 0.002  | 0.1332 | 0.0075 | 0.0211 | 0.0007 | 127 | 7  | 135 | 5 | 1.06 |
| 117QY-3-1-25  | 255  | 215  | 1.19 | 0.0517 | 0.0026 | 0.1448 | 0.0125 | 0.0206 | 0.0006 | 137 | 11 | 131 | 4 | 0.96 |
| 117QY-4-2-1   | 440  | 595  | 0.74 | 0.0491 | 0.002  | 0.1418 | 0.0075 | 0.0206 | 0.0006 | 135 | 7  | 131 | 4 | 0.97 |
| 117QY-4-2-2   | 201  | 217  | 0.92 | 0.0509 | 0.0028 | 0.1397 | 0.008  | 0.0201 | 0.0006 | 133 | 7  | 128 | 4 | 0.96 |
| 117QY-4-2-3   | 286  | 419  | 0.68 | 0.0498 | 0.0023 | 0.1454 | 0.0074 | 0.0208 | 0.0006 | 138 | 7  | 133 | 4 | 0.96 |
| 117QY-4-2-4   | 207  | 318  | 0.65 | 0.0496 | 0.0028 | 0.1443 | 0.0082 | 0.0213 | 0.0007 | 137 | 7  | 136 | 4 | 0.99 |
| 117QY-4-2-5   | 311  | 429  | 0.73 | 0.0484 | 0.0023 | 0.1358 | 0.0068 | 0.0202 | 0.0006 | 129 | 6  | 129 | 4 | 1.00 |
| 117QY-4-2-6   | 194  | 225  | 0.87 | 0.0504 | 0.0027 | 0.1473 | 0.008  | 0.021  | 0.0007 | 140 | 7  | 134 | 5 | 0.96 |
| 117QY-4-2-7   | 500  | 480  | 1.04 | 0.0503 | 0.0022 | 0.1418 | 0.0063 | 0.0202 | 0.0006 | 135 | 6  | 129 | 4 | 0.96 |
| 117QY-4-2-8   | 85.4 | 123  | 0.69 | 0.0554 | 0.0041 | 0.1622 | 0.0115 | 0.0213 | 0.0007 | 153 | 10 | 136 | 5 | 0.89 |
| 117QY-4-2-9   | 244  | 294  | 0.83 | 0.0475 | 0.0027 | 0.1413 | 0.0084 | 0.0213 | 0.0007 | 134 | 8  | 136 | 4 | 1.01 |
| 117QY-4-2-10  | 250  | 329  | 0.76 | 0.0527 | 0.0029 | 0.1492 | 0.0081 | 0.0203 | 0.0007 | 141 | 7  | 130 | 4 | 0.92 |
| 117QY-4-2-11  | 324  | 395  | 0.82 | 0.0463 | 0.0023 | 0.14   | 0.008  | 0.0216 | 0.0007 | 133 | 7  | 138 | 4 | 1.04 |
| 117QY-4-2-12  | 315  | 426  | 0.74 | 0.0485 | 0.0023 | 0.1441 | 0.0087 | 0.0213 | 0.0006 | 137 | 8  | 136 | 4 | 0.99 |
| 117QY-4-2-13  | 120  | 178  | 0.68 | 0.0587 | 0.0035 | 0.1711 | 0.0133 | 0.0208 | 0.0006 | 160 | 12 | 132 | 4 | 0.83 |
| 117QY-4-2-14  | 213  | 288  | 0.74 | 0.047  | 0.0027 | 0.1331 | 0.0109 | 0.0204 | 0.0006 | 127 | 10 | 130 | 4 | 1.02 |
| 117QY-4-2-15  | 164  | 222  | 0.74 | 0.0482 | 0.0028 | 0.1353 | 0.012  | 0.0205 | 0.0006 | 129 | 11 | 131 | 4 | 1.02 |
| 117QY-4-2-16  | 222  | 327  | 0.68 | 0.0493 | 0.0022 | 0.1382 | 0.0125 | 0.0201 | 0.0006 | 131 | 11 | 128 | 3 | 0.98 |
| 117QY-4-2-17  | 197  | 248  | 0.79 | 0.0465 | 0.0028 | 0.139  | 0.0128 | 0.0215 | 0.0006 | 132 | 11 | 137 | 4 | 1.04 |
| 117QY-4-2-18  | 257  | 322  | 0.8  | 0.049  | 0.0025 | 0.1374 | 0.0099 | 0.0204 | 0.0006 | 131 | 9  | 130 | 4 | 0.99 |
| 117QY-4-2-19  | 292  | 318  | 0.92 | 0.0462 | 0.0023 | 0.1379 | 0.0088 | 0.0214 | 0.0006 | 131 | 8  | 137 | 4 | 1.05 |
| 117QY-4-2-20  | 513  | 536  | 0.96 | 0.0472 | 0.0021 | 0.1347 | 0.0071 | 0.0206 | 0.0006 | 128 | 6  | 131 | 4 | 1.02 |
| 117QY-4-2-21  | 206  | 375  | 0.55 | 0.0477 | 0.0022 | 0.1374 | 0.0082 | 0.0211 | 0.0006 | 131 | 7  | 134 | 4 | 1.02 |
| 117QY-4-2-22  | 216  | 244  | 0.89 | 0.0457 | 0.0029 | 0.1269 | 0.0104 | 0.0202 | 0.0006 | 121 | 9  | 129 | 4 | 1.07 |
| 117QY-4-2-23  | 351  | 361  | 0.97 | 0.0503 | 0.0026 | 0.1449 | 0.0135 | 0.0209 | 0.0006 | 137 | 12 | 133 | 4 | 0.97 |
| 117QY-4-2-24  | 231  | 257  | 0.9  | 0.0531 | 0.0029 | 0.1467 | 0.0157 | 0.02   | 0.0006 | 139 | 14 | 128 | 4 | 0.92 |
| 117QY-4-2-25  | 307  | 307  | 1    | 0.0506 | 0.0026 | 0.1438 | 0.0164 | 0.0204 | 0.0006 | 136 | 15 | 130 | 4 | 0.96 |
| 117QY-4-2-26  | 120  | 155  | 0.78 | 0.0524 | 0.0035 | 0.148  | 0.0164 | 0.0213 | 0.0007 | 140 | 15 | 136 | 4 | 0.97 |
| 117QY-4-2-27  | 301  | 361  | 0.84 | 0.0585 | 0.003  | 0.1628 | 0.0152 | 0.0206 | 0.0006 | 153 | 13 | 131 | 4 | 0.86 |
| 117QY-4-2-28  | 169  | 238  | 0.71 | 0.0518 | 0.0029 | 0.1449 | 0.0133 | 0.0203 | 0.0006 | 137 | 12 | 129 | 4 | 0.94 |
| 117QY-4-2-29  | 194  | 263  | 0.74 | 0.0494 | 0.0025 | 0.1414 | 0.0124 | 0.0209 | 0.0006 | 134 | 11 | 133 | 4 | 0.99 |
| 117QY-10-1-1  | 117  | 117  | 0.99 | 0.0614 | 0.0037 | 0.1689 | 0.0153 | 0.0197 | 0.0006 | 158 | 13 | 126 | 4 | 0.80 |
| 117QY-10-1-2  | 249  | 189  | 1.32 | 0.0497 | 0.004  | 0.1343 | 0.0143 | 0.0198 | 0.0007 | 128 | 13 | 126 | 4 | 0.98 |
| 117QY-10-1-3  | 236  | 161  | 1.47 | 0.0582 | 0.0041 | 0.1646 | 0.0173 | 0.0197 | 0.0006 | 155 | 15 | 126 | 4 | 0.81 |
| 117QY-10-1-4  | 175  | 117  | 1.5  | 0.0567 | 0.0035 | 0.1602 | 0.0168 | 0.0199 | 0.0007 | 151 | 15 | 127 | 4 | 0.84 |
| 117QY-10-1-5  | 220  | 176  | 1.25 | 0.0524 | 0.0037 | 0.1532 | 0.0164 | 0.0204 | 0.0006 | 145 | 14 | 130 | 4 | 0.90 |
| 117QY-10-1-6  | 199  | 143  | 1.39 | 0.05   | 0.003  | 0.1419 | 0.0136 | 0.0198 | 0.0006 | 135 | 12 | 127 | 4 | 0.94 |
| 117QY-10-1-7  | 91.8 | 97.6 | 0.94 | 0.059  | 0.0039 | 0.1677 | 0.0171 | 0.0201 | 0.0007 | 157 | 15 | 128 | 4 | 0.82 |
| 117QY-10-1-8  | 95.1 | 98.4 | 0.97 | 0.0529 | 0.0043 | 0.1504 | 0.0172 | 0.0203 | 0.0008 | 142 | 15 | 129 | 5 | 0.91 |
| 117QY-10-1-9  | 120  | 119  | 1.01 | 0.0596 | 0.0038 | 0.1578 | 0.0166 | 0.0197 | 0.0006 | 149 | 15 | 126 | 4 | 0.85 |
| 117QY-10-1-10 | 127  | 114  | 1.11 | 0.0592 | 0.004  | 0.1671 | 0.0169 | 0.0203 | 0.0006 | 157 | 15 | 130 | 4 | 0.83 |
| 117QY-10-1-11 | 147  | 146  | 1.01 | 0.0567 | 0.0033 | 0.1566 | 0.0134 | 0.0203 | 0.0006 | 148 | 12 | 130 | 4 | 0.88 |
| 117QY-10-1-12 | 144  | 146  | 0.99 | 0.0493 | 0.0031 | 0.1358 | 0.0119 | 0.0199 | 0.0006 | 129 | 11 | 127 | 4 | 0.98 |
| 117QY-10-1-13 | 107  | 108  | 0.99 | 0.0604 | 0.0039 | 0.1644 | 0.0142 | 0.0199 | 0.0006 | 155 | 12 | 127 | 4 | 0.82 |
| 117QY-10-1-14 | 148  | 144  | 1.03 | 0.0572 | 0.0034 | 0.16   | 0.0141 | 0.0202 | 0.0007 | 151 | 12 | 129 | 4 | 0.85 |
| 117QY-10-1-15 | 152  | 123  | 1.23 | 0.0557 | 0.0036 | 0.1528 | 0.0138 | 0.0199 | 0.0006 | 144 | 12 | 127 | 4 | 0.88 |
| 117QY-10-1-16 | 111  | 106  | 1.05 | 0.0564 | 0.0037 | 0.154  | 0.0126 | 0.02   | 0.0006 | 145 | 11 | 128 | 4 | 0.88 |
| 117QY-10-1-17 | 114  | 113  | 1.02 | 0.0513 | 0.0042 | 0.1417 | 0.0118 | 0.0202 | 0.0007 | 135 | 10 | 129 | 4 | 0.96 |
| 117QY-10-1-18 | 470  | 278  | 1.69 | 0.0521 | 0.0026 | 0.1459 | 0.0089 | 0.0202 | 0.0006 | 138 | 8  | 129 | 4 | 0.93 |
| 117QY-10-1-19 | 222  | 275  | 0.81 | 0.0604 | 0.0033 | 0.1642 | 0.0111 | 0.0201 | 0.0006 | 154 | 10 | 128 | 4 | 0.83 |
| 117QY-10-1-20 | 264  | 206  | 1.28 | 0.0474 | 0.0028 | 0.1263 | 0.0098 | 0.0198 | 0.0006 | 121 | 9  | 126 | 4 | 1.04 |
| 117QY-10-1-21 | 118  | 113  | 1.04 | 0.0566 | 0.0036 | 0.1593 | 0.0143 | 0.0205 | 0.0006 | 150 | 13 | 131 | 4 | 0.87 |
| 117QY-10-1-22 | 172  | 144  | 1.19 | 0.0526 | 0.0032 | 0.1438 | 0.0121 | 0.02   | 0.0006 | 128 | 4  | 137 | 5 | 1.07 |
| 117QY-10-1-23 | 181  | 124  | 1.45 | 0.0593 | 0.0038 | 0.1658 | 0.014  | 0.0201 | 0.0006 | 128 | 4  | 137 | 4 | 1.07 |
| 117QY-10-1-24 | 427  | 429  | 0.99 | 0.0632 | 0.0048 | 0.1757 | 0.0168 | 0.0201 | 0.0006 | 428 | 4  | 450 | 7 | 1.17 |
| 117QY-10-1-25 | 104  | 104  | 1    | 0.0615 | 0.0039 | 0.1709 | 0.0151 | 0.0202 | 0.0006 | 129 | 4  | 139 | 5 | 1.08 |

N7, Taishun (Duan et al., 2013)

|              |     |     |      |        |        |        |        |        |        |     |   |     |   |      |
|--------------|-----|-----|------|--------|--------|--------|--------|--------|--------|-----|---|-----|---|------|
| 117TS-12-1-1 | 368 | 291 | 1.27 | 0.0497 | 0.0021 | 0.1207 | 0.0055 | 0.0178 | 0.0005 | 116 | 5 | 113 | 3 | 0.97 |
| 117TS-12-1-2 | 308 | 282 | 1.09 | 0.0546 | 0.0031 | 0.1325 | 0.0076 | 0.0178 | 0.0005 | 126 | 7 | 114 | 3 | 0.90 |
| 117TS-12-1-3 | 536 | 415 | 1.29 | 0.0482 | 0.0018 | 0.1183 | 0.0047 | 0.0178 | 0.0005 | 113 | 4 | 114 | 3 | 1.01 |



|               |      |     |      |        |        |        |        |        |        |     |    |     |   |      |
|---------------|------|-----|------|--------|--------|--------|--------|--------|--------|-----|----|-----|---|------|
| 117TS-12-1-4  | 438  | 330 | 1.33 | 0.0579 | 0.0025 | 0.1433 | 0.0067 | 0.018  | 0.0005 | 136 | 6  | 115 | 3 | 0.85 |
| 117TS-12-1-5  | 756  | 440 | 1.72 | 0.0541 | 0.0023 | 0.1315 | 0.0056 | 0.0178 | 0.0005 | 125 | 5  | 114 | 3 | 0.91 |
| 117TS-12-1-6  | 280  | 289 | 0.97 | 0.0546 | 0.0028 | 0.1318 | 0.0066 | 0.0177 | 0.0005 | 126 | 6  | 113 | 3 | 0.90 |
| 117TS-12-1-7  | 359  | 280 | 1.28 | 0.0494 | 0.0021 | 0.122  | 0.0057 | 0.0179 | 0.0005 | 117 | 5  | 114 | 3 | 0.97 |
| 117TS-12-1-8  | 597  | 266 | 2.25 | 0.0511 | 0.0021 | 0.1463 | 0.0064 | 0.0209 | 0.0006 | 139 | 6  | 134 | 4 | 0.96 |
| 117TS-12-1-9  | 432  | 300 | 1.44 | 0.0596 | 0.004  | 0.1474 | 0.0117 | 0.018  | 0.0005 | 140 | 10 | 115 | 3 | 0.82 |
| 117TS-12-1-10 | 443  | 176 | 2.52 | 0.0497 | 0.0026 | 0.1203 | 0.0063 | 0.0177 | 0.0005 | 115 | 6  | 113 | 3 | 0.98 |
| 117TS-12-1-11 | 229  | 239 | 0.96 | 0.0584 | 0.0037 | 0.1454 | 0.009  | 0.0184 | 0.0005 | 138 | 8  | 117 | 3 | 0.85 |
| 117TS-12-1-12 | 256  | 247 | 1.04 | 0.0518 | 0.0022 | 0.1274 | 0.0058 | 0.0178 | 0.0005 | 122 | 5  | 114 | 3 | 0.93 |
| 117TS-12-1-13 | 459  | 311 | 1.48 | 0.0494 | 0.0021 | 0.1218 | 0.0054 | 0.018  | 0.0005 | 117 | 5  | 115 | 3 | 0.98 |
| 117TS-12-1-14 | 720  | 454 | 1.59 | 0.048  | 0.0018 | 0.1193 | 0.0048 | 0.018  | 0.0005 | 114 | 4  | 115 | 3 | 1.01 |
| 117TS-12-1-15 | 263  | 281 | 0.93 | 0.0572 | 0.0027 | 0.1458 | 0.0076 | 0.0183 | 0.0005 | 138 | 7  | 117 | 3 | 0.85 |
| 117TS-12-1-16 | 332  | 290 | 1.15 | 0.058  | 0.0037 | 0.1439 | 0.0093 | 0.0181 | 0.0005 | 136 | 8  | 116 | 3 | 0.85 |
| 117TS-12-1-17 | 316  | 247 | 1.28 | 0.0556 | 0.0032 | 0.1392 | 0.008  | 0.0182 | 0.0005 | 132 | 7  | 116 | 3 | 0.88 |
| 117TS-12-1-18 | 539  | 365 | 1.48 | 0.0516 | 0.0021 | 0.1287 | 0.0056 | 0.018  | 0.0005 | 123 | 5  | 115 | 3 | 0.93 |
| 117TS-12-1-19 | 471  | 389 | 1.21 | 0.0482 | 0.0023 | 0.1212 | 0.0056 | 0.0185 | 0.0005 | 116 | 5  | 118 | 3 | 1.02 |
| 117TS-12-1-20 | 654  | 432 | 1.51 | 0.0496 | 0.002  | 0.123  | 0.0053 | 0.018  | 0.0005 | 118 | 5  | 115 | 3 | 0.97 |
| 117TS-12-1-21 | 479  | 348 | 1.38 | 0.0532 | 0.0022 | 0.1293 | 0.0056 | 0.0178 | 0.0005 | 123 | 5  | 114 | 3 | 0.93 |
| 117TS-12-1-22 | 663  | 399 | 1.66 | 0.0496 | 0.0022 | 0.12   | 0.0055 | 0.0178 | 0.0005 | 115 | 5  | 113 | 3 | 0.98 |
| 117TS-12-1-23 | 589  | 314 | 1.87 | 0.0532 | 0.0028 | 0.1364 | 0.0088 | 0.0183 | 0.0005 | 130 | 8  | 117 | 3 | 0.90 |
| 117TS-12-1-24 | 420  | 300 | 1.4  | 0.0511 | 0.0025 | 0.126  | 0.0062 | 0.018  | 0.0005 | 121 | 6  | 115 | 3 | 0.95 |
| 117TS-12-1-25 | 272  | 222 | 1.23 | 0.0625 | 0.0049 | 0.1508 | 0.0116 | 0.018  | 0.0005 | 143 | 10 | 115 | 3 | 0.80 |
| 117TS-3-1-1   | 280  | 273 | 1.03 | 0.0527 | 0.0042 | 0.1247 | 0.01   | 0.0173 | 0.0005 | 119 | 9  | 110 | 3 | 0.92 |
| 117TS-3-1-2   | 432  | 363 | 1.19 | 0.0544 | 0.0024 | 0.1315 | 0.0059 | 0.0175 | 0.0005 | 125 | 5  | 112 | 3 | 0.90 |
| 117TS-3-1-3   | 470  | 375 | 1.25 | 0.0485 | 0.0021 | 0.1156 | 0.0052 | 0.0172 | 0.0005 | 111 | 5  | 110 | 3 | 0.99 |
| 117TS-3-1-4   | 368  | 329 | 1.12 | 0.0513 | 0.0023 | 0.1271 | 0.0056 | 0.0181 | 0.0005 | 121 | 5  | 115 | 3 | 0.95 |
| 117TS-3-1-5   | 595  | 455 | 1.31 | 0.0504 | 0.0018 | 0.1256 | 0.0048 | 0.0179 | 0.0005 | 120 | 4  | 114 | 3 | 0.95 |
| 117TS-3-1-6   | 561  | 389 | 1.44 | 0.0575 | 0.0023 | 0.1411 | 0.0058 | 0.0177 | 0.0005 | 134 | 5  | 113 | 3 | 0.84 |
| 117TS-3-1-7   | 1859 | 817 | 2.28 | 0.0528 | 0.0026 | 0.1263 | 0.006  | 0.0174 | 0.0005 | 121 | 5  | 111 | 3 | 0.92 |
| 117TS-3-1-8   | 342  | 309 | 1.1  | 0.0547 | 0.0037 | 0.1276 | 0.0082 | 0.0173 | 0.0005 | 122 | 7  | 111 | 3 | 0.91 |
| 117TS-3-1-9   | 848  | 470 | 1.8  | 0.0501 | 0.0019 | 0.1179 | 0.0046 | 0.0171 | 0.0004 | 113 | 4  | 109 | 3 | 0.96 |
| 117TS-3-1-10  | 806  | 456 | 1.77 | 0.0526 | 0.0022 | 0.1252 | 0.0052 | 0.0172 | 0.0005 | 120 | 5  | 110 | 3 | 0.92 |
| 117TS-3-1-11  | 521  | 431 | 1.21 | 0.0498 | 0.0021 | 0.1218 | 0.0053 | 0.0177 | 0.0005 | 117 | 5  | 113 | 3 | 0.97 |
| 117TS-3-1-12  | 524  | 392 | 1.34 | 0.0502 | 0.0022 | 0.122  | 0.0053 | 0.0177 | 0.0005 | 117 | 5  | 113 | 3 | 0.97 |
| 117TS-3-1-13  | 289  | 304 | 0.95 | 0.0573 | 0.003  | 0.1367 | 0.0069 | 0.0174 | 0.0005 | 130 | 6  | 111 | 3 | 0.85 |
| 117TS-3-1-14  | 520  | 354 | 1.47 | 0.0558 | 0.0035 | 0.1345 | 0.0084 | 0.0175 | 0.0005 | 128 | 8  | 112 | 3 | 0.88 |
| 117TS-3-1-15  | 418  | 343 | 1.22 | 0.0554 | 0.0052 | 0.1381 | 0.0148 | 0.0178 | 0.0005 | 131 | 13 | 114 | 3 | 0.87 |
| 117TS-3-1-16  | 378  | 334 | 1.13 | 0.0517 | 0.0021 | 0.1285 | 0.0054 | 0.0179 | 0.0005 | 123 | 5  | 115 | 3 | 0.93 |
| 117TS-3-1-17  | 950  | 460 | 2.07 | 0.0531 | 0.0028 | 0.1278 | 0.0064 | 0.0177 | 0.0005 | 122 | 6  | 113 | 3 | 0.93 |
| 117TS-3-1-18  | 352  | 311 | 1.13 | 0.0508 | 0.0024 | 0.1214 | 0.0055 | 0.0175 | 0.0005 | 116 | 5  | 112 | 3 | 0.97 |
| 117TS-3-1-19  | 460  | 383 | 1.2  | 0.0537 | 0.0024 | 0.1329 | 0.0058 | 0.0181 | 0.0005 | 127 | 5  | 116 | 3 | 0.91 |
| 117TS-3-1-20  | 464  | 310 | 1.5  | 0.0559 | 0.0037 | 0.1359 | 0.0083 | 0.0179 | 0.0005 | 129 | 7  | 114 | 3 | 0.88 |
| 117TS-3-1-21  | 528  | 415 | 1.27 | 0.0526 | 0.0023 | 0.1288 | 0.0057 | 0.0179 | 0.0005 | 123 | 5  | 114 | 3 | 0.93 |
| 117TS-3-1-22  | 457  | 342 | 1.34 | 0.0587 | 0.0043 | 0.1424 | 0.0094 | 0.018  | 0.0005 | 135 | 8  | 115 | 3 | 0.85 |
| 117TS-3-1-23  | 310  | 294 | 1.05 | 0.0531 | 0.0025 | 0.1278 | 0.0058 | 0.0176 | 0.0005 | 122 | 5  | 112 | 3 | 0.92 |
| 117TS-3-1-24  | 378  | 314 | 1.2  | 0.0508 | 0.0024 | 0.1249 | 0.0058 | 0.018  | 0.0005 | 120 | 5  | 115 | 3 | 0.96 |
| 117TS-3-1-25  | 481  | 364 | 1.32 | 0.0517 | 0.0024 | 0.1264 | 0.0056 | 0.0179 | 0.0005 | 121 | 5  | 115 | 3 | 0.95 |
| 117TS-2-1-1   | 208  | 198 | 1.05 | 0.064  | 0.0057 | 0.1499 | 0.0137 | 0.0172 | 0.0005 | 142 | 12 | 110 | 3 | 0.77 |
| 117TS-2-1-2   | 627  | 358 | 1.75 | 0.0507 | 0.0035 | 0.1211 | 0.008  | 0.0177 | 0.0005 | 116 | 7  | 113 | 3 | 0.97 |
| 117TS-2-1-3   | 426  | 345 | 1.23 | 0.0543 | 0.0038 | 0.1289 | 0.0082 | 0.0176 | 0.0005 | 123 | 7  | 113 | 3 | 0.92 |
| 117TS-2-1-4   | 933  | 454 | 2.05 | 0.052  | 0.0019 | 0.1238 | 0.0046 | 0.0174 | 0.0005 | 119 | 4  | 111 | 3 | 0.93 |
| 117TS-2-1-5   | 481  | 336 | 1.43 | 0.0583 | 0.0047 | 0.1405 | 0.012  | 0.0175 | 0.0005 | 134 | 11 | 112 | 3 | 0.84 |
| 117TS-2-1-6   | 636  | 410 | 1.55 | 0.0546 | 0.0028 | 0.1286 | 0.0061 | 0.0172 | 0.0005 | 123 | 6  | 110 | 3 | 0.89 |
| 117TS-2-1-7   | 1022 | 514 | 1.99 | 0.0538 | 0.0026 | 0.127  | 0.0061 | 0.0172 | 0.0005 | 121 | 6  | 110 | 3 | 0.91 |
| 117TS-2-1-8   | 309  | 275 | 1.12 | 0.0602 | 0.0035 | 0.1424 | 0.008  | 0.0174 | 0.0005 | 135 | 7  | 111 | 3 | 0.82 |
| 117TS-2-1-9   | 327  | 313 | 1.05 | 0.0547 | 0.0033 | 0.1249 | 0.0077 | 0.0166 | 0.0005 | 119 | 7  | 106 | 3 | 0.89 |
| 117TS-2-1-10  | 411  | 340 | 1.21 | 0.0537 | 0.0026 | 0.1293 | 0.0061 | 0.0176 | 0.0005 | 123 | 6  | 113 | 3 | 0.92 |
| 117TS-2-1-11  | 407  | 300 | 1.35 | 0.0574 | 0.0035 | 0.1357 | 0.0082 | 0.0176 | 0.0005 | 129 | 7  | 112 | 3 | 0.87 |
| 117TS-2-1-12  | 758  | 403 | 1.88 | 0.0516 | 0.002  | 0.1398 | 0.0055 | 0.0197 | 0.0005 | 133 | 5  | 126 | 3 | 0.95 |
| 117TS-2-1-13  | 1576 | 605 | 2.61 | 0.0509 | 0.0018 | 0.1181 | 0.0042 | 0.0169 | 0.0004 | 113 | 4  | 108 | 3 | 0.96 |
| 117TS-2-1-14  | 1292 | 484 | 2.67 | 0.0591 | 0.0039 | 0.1411 | 0.0094 | 0.0175 | 0.0005 | 134 | 8  | 112 | 3 | 0.84 |
| 117TS-2-1-15  | 419  | 309 | 1.36 | 0.0585 | 0.005  | 0.1441 | 0.0145 | 0.0176 | 0.0005 | 137 | 13 | 112 | 3 | 0.82 |
| 117TS-2-1-16  | 360  | 286 | 1.26 | 0.0583 | 0.0034 | 0.1412 | 0.0083 | 0.0177 | 0.0005 | 134 | 7  | 113 | 3 | 0.84 |
| 117TS-2-1-17  | 1215 | 558 | 2.18 | 0.0508 | 0.002  | 0.1224 | 0.005  | 0.0176 | 0.0005 | 117 | 5  | 113 | 3 | 0.97 |
| 117TS-2-1-18  | 214  | 336 | 0.64 | 0.0522 | 0.0025 | 0.1505 | 0.0072 | 0.021  | 0.0006 | 142 | 6  | 134 | 4 | 0.94 |
| 117TS-2-1-19  | 428  | 320 | 1.34 | 0.0524 | 0.0033 | 0.1247 | 0.008  | 0.0175 | 0.0005 | 119 | 7  | 112 | 3 | 0.94 |
| 117TS-2-1-20  | 1078 | 522 | 2.06 | 0.0544 | 0.0034 | 0.1268 | 0.0073 | 0.0171 | 0.0005 | 121 | 7  | 109 | 3 | 0.90 |
| 117TS-2-1-21  | 1617 | 625 | 2.59 | 0.0533 | 0.0023 | 0.1292 | 0.0054 | 0.0178 | 0.0005 | 123 | 5  | 114 | 3 | 0.93 |
| 117TS-2-1-22  | 777  | 439 | 1.77 | 0.0549 | 0.0026 | 0.1329 | 0.0057 | 0.0178 | 0.0005 | 127 | 5  | 114 | 3 | 0.90 |
| 117TS-2-1-23  | 835  | 411 | 2.03 | 0.051  | 0.0019 | 0.1397 | 0.0056 | 0.0199 | 0.0005 | 133 | 5  | 127 | 3 | 0.95 |

# Fujian province

N8, Shouning (Duan et al., 2013)

|              |     |     |      |        |        |        |        |        |        |     |    |     |   |      |
|--------------|-----|-----|------|--------|--------|--------|--------|--------|--------|-----|----|-----|---|------|
| 117SN-3-1-1  | 238 | 230 | 1.04 | 0.0496 | 0.0021 | 0.149  | 0.0065 | 0.0219 | 0.0006 | 141 | 6  | 140 | 4 | 0.99 |
| 117SN-3-1-2  | 227 | 243 | 0.94 | 0.0484 | 0.0019 | 0.1513 | 0.0063 | 0.0227 | 0.0006 | 143 | 6  | 145 | 4 | 1.01 |
| 117SN-3-1-3  | 129 | 152 | 0.85 | 0.0499 | 0.0025 | 0.1516 | 0.0078 | 0.0223 | 0.0006 | 143 | 7  | 142 | 4 | 0.99 |
| 117SN-3-1-4  | 140 | 185 | 0.76 | 0.0558 | 0.0039 | 0.1738 | 0.0119 | 0.0228 | 0.0007 | 163 | 10 | 145 | 4 | 0.89 |
| 117SN-3-1-5  | 177 | 253 | 0.7  | 0.0491 | 0.0019 | 0.1524 | 0.0063 | 0.0226 | 0.0006 | 144 | 6  | 144 | 4 | 1.00 |
| 117SN-3-1-6  | 253 | 319 | 0.79 | 0.0495 | 0.0019 | 0.1541 | 0.0063 | 0.0228 | 0.0006 | 146 | 6  | 146 | 4 | 1.00 |
| 117SN-3-1-7  | 240 | 297 | 0.81 | 0.0492 | 0.002  | 0.1495 | 0.0064 | 0.0221 | 0.0006 | 141 | 6  | 141 | 4 | 1.00 |
| 117SN-3-1-8  | 218 | 219 | 1    | 0.0493 | 0.0021 | 0.1508 | 0.0065 | 0.0224 | 0.0006 | 143 | 6  | 143 | 4 | 1.00 |
| 117SN-3-1-9  | 128 | 186 | 0.69 | 0.0494 | 0.0026 | 0.1541 | 0.0084 | 0.0228 | 0.0006 | 146 | 7  | 145 | 4 | 0.99 |
| 117SN-3-1-10 | 104 | 155 | 0.67 | 0.0475 | 0.0022 | 0.1441 | 0.0069 | 0.0221 | 0.0006 | 137 | 6  | 141 | 4 | 1.03 |

|              |       |      |      |        |        |        |        |        |        |     |    |     |   |      |
|--------------|-------|------|------|--------|--------|--------|--------|--------|--------|-----|----|-----|---|------|
| 117SN-3-1-11 | 163   | 200  | 0.81 | 0.0559 | 0.0028 | 0.1743 | 0.0097 | 0.0225 | 0.0006 | 163 | 8  | 143 | 4 | 0.88 |
| 117SN-3-1-12 | 332   | 1089 | 0.3  | 0.0481 | 0.0014 | 0.1703 | 0.0057 | 0.0256 | 0.0007 | 160 | 5  | 163 | 4 | 1.02 |
| 117SN-3-1-13 | 211   | 297  | 0.71 | 0.0495 | 0.0019 | 0.1565 | 0.0068 | 0.0229 | 0.0007 | 148 | 6  | 146 | 4 | 0.99 |
| 117SN-3-1-14 | 595   | 454  | 1.31 | 0.0484 | 0.0016 | 0.1496 | 0.0058 | 0.0224 | 0.0006 | 142 | 5  | 143 | 4 | 1.01 |
| 117SN-3-1-15 | 404   | 680  | 0.59 | 0.0478 | 0.0014 | 0.1688 | 0.0061 | 0.0255 | 0.0007 | 158 | 5  | 163 | 4 | 1.03 |
| 117SN-3-1-16 | 385   | 410  | 0.94 | 0.0477 | 0.0018 | 0.1486 | 0.006  | 0.0227 | 0.0007 | 141 | 5  | 145 | 4 | 1.03 |
| 117SN-3-1-17 | 301   | 325  | 0.93 | 0.0496 | 0.0019 | 0.1509 | 0.0062 | 0.022  | 0.0006 | 143 | 5  | 141 | 4 | 0.99 |
| 117SN-3-1-18 | 222   | 216  | 1.03 | 0.058  | 0.0024 | 0.1778 | 0.0079 | 0.0223 | 0.0006 | 166 | 7  | 142 | 4 | 0.86 |
| 117SN-3-1-19 | 121   | 180  | 0.67 | 0.0518 | 0.0022 | 0.1595 | 0.0077 | 0.0225 | 0.0006 | 150 | 7  | 143 | 4 | 0.95 |
| 117SN-3-1-20 | 149   | 188  | 0.79 | 0.048  | 0.0023 | 0.1465 | 0.0073 | 0.0223 | 0.0006 | 139 | 6  | 142 | 4 | 1.02 |
| 117SN-3-1-21 | 182   | 279  | 0.65 | 0.0575 | 0.0025 | 0.1737 | 0.008  | 0.0219 | 0.0006 | 163 | 7  | 139 | 4 | 0.85 |
| 117SN-3-1-22 | 204   | 203  | 1    | 0.0623 | 0.0037 | 0.1955 | 0.013  | 0.0224 | 0.0007 | 181 | 11 | 143 | 4 | 0.79 |
| 117SN-3-1-23 | 109.7 | 134  | 0.82 | 0.0513 | 0.0028 | 0.1564 | 0.0086 | 0.0224 | 0.0007 | 148 | 8  | 143 | 4 | 0.97 |
| 117SN-3-1-24 | 144   | 162  | 0.89 | 0.0638 | 0.0036 | 0.2048 | 0.0132 | 0.0228 | 0.0006 | 189 | 11 | 145 | 4 | 0.77 |
| 117SN-3-1-25 | 211   | 265  | 0.8  | 0.0518 | 0.0028 | 0.1628 | 0.0093 | 0.0226 | 0.0006 | 153 | 8  | 144 | 4 | 0.94 |
| 117SN-3-1-26 | 189   | 201  | 0.94 | 0.0529 | 0.0021 | 0.1631 | 0.0068 | 0.0225 | 0.0006 | 153 | 6  | 143 | 4 | 0.93 |
| 117SN-3-1-27 | 240   | 297  | 0.81 | 0.0491 | 0.002  | 0.1544 | 0.0065 | 0.0228 | 0.0006 | 146 | 6  | 146 | 4 | 1.00 |

|              |      |     |      |        |        |        |        |        |        |     |    |     |   |      |
|--------------|------|-----|------|--------|--------|--------|--------|--------|--------|-----|----|-----|---|------|
| 117SN-1-1-1  | 677  | 361 | 1.87 | 0.0496 | 0.0018 | 0.1375 | 0.0059 | 0.0202 | 0.0005 | 131 | 5  | 129 | 3 | 0.98 |
| 117SN-1-1-2  | 439  | 276 | 1.59 | 0.0506 | 0.002  | 0.1367 | 0.0068 | 0.0197 | 0.0005 | 130 | 6  | 126 | 3 | 0.97 |
| 117SN-1-1-3  | 465  | 468 | 0.99 | 0.0486 | 0.0017 | 0.1321 | 0.0072 | 0.0198 | 0.0005 | 126 | 6  | 126 | 3 | 1.00 |
| 117SN-1-1-4  | 240  | 267 | 0.9  | 0.0516 | 0.0033 | 0.1397 | 0.0094 | 0.02   | 0.0005 | 133 | 8  | 128 | 3 | 0.96 |
| 117SN-1-1-5  | 203  | 203 | 0.98 | 0.0601 | 0.0033 | 0.1658 | 0.0093 | 0.0202 | 0.0006 | 156 | 8  | 129 | 4 | 0.83 |
| 117SN-1-1-6  | 513  | 329 | 1.56 | 0.0518 | 0.0022 | 0.1417 | 0.0065 | 0.0199 | 0.0005 | 135 | 6  | 127 | 3 | 0.94 |
| 117SN-1-1-7  | 336  | 277 | 1.21 | 0.0518 | 0.0023 | 0.1394 | 0.0064 | 0.0199 | 0.0005 | 132 | 6  | 127 | 3 | 0.96 |
| 117SN-1-1-8  | 357  | 341 | 1.05 | 0.0451 | 0.0021 | 0.1236 | 0.0059 | 0.02   | 0.0005 | 118 | 5  | 128 | 3 | 1.08 |
| 117SN-1-1-9  | 295  | 229 | 1.29 | 0.0553 | 0.0039 | 0.1505 | 0.0104 | 0.02   | 0.0006 | 142 | 9  | 128 | 4 | 0.90 |
| 117SN-1-1-10 | 227  | 230 | 0.99 | 0.0476 | 0.0025 | 0.127  | 0.0071 | 0.0194 | 0.0005 | 121 | 6  | 124 | 3 | 1.02 |
| 117SN-1-1-11 | 556  | 237 | 2.34 | 0.0437 | 0.0021 | 0.1174 | 0.006  | 0.0196 | 0.0005 | 113 | 5  | 125 | 3 | 1.11 |
| 117SN-1-1-12 | 312  | 222 | 1.41 | 0.051  | 0.0025 | 0.1377 | 0.0068 | 0.0198 | 0.0006 | 131 | 6  | 126 | 3 | 0.96 |
| 117SN-1-1-13 | 430  | 260 | 1.66 | 0.0475 | 0.0022 | 0.1261 | 0.006  | 0.0194 | 0.0005 | 121 | 5  | 124 | 3 | 1.02 |
| 117SN-1-1-14 | 749  | 387 | 1.93 | 0.0574 | 0.0023 | 0.1614 | 0.0072 | 0.0204 | 0.0005 | 152 | 6  | 130 | 3 | 0.86 |
| 117SN-1-1-15 | 598  | 312 | 1.92 | 0.059  | 0.0022 | 0.1631 | 0.007  | 0.02   | 0.0005 | 153 | 6  | 128 | 3 | 0.84 |
| 117SN-1-1-16 | 244  | 123 | 1.99 | 0.0564 | 0.003  | 0.1581 | 0.0086 | 0.0206 | 0.0006 | 149 | 8  | 132 | 4 | 0.89 |
| 117SN-1-1-17 | 403  | 357 | 1.13 | 0.0464 | 0.002  | 0.1227 | 0.0055 | 0.0194 | 0.0005 | 118 | 5  | 124 | 3 | 1.05 |
| 117SN-1-1-18 | 252  | 198 | 1.27 | 0.0486 | 0.0026 | 0.1301 | 0.0067 | 0.0196 | 0.0006 | 124 | 6  | 125 | 4 | 1.01 |
| 117SN-1-1-19 | 347  | 262 | 1.21 | 0.0571 | 0.0032 | 0.1526 | 0.0089 | 0.0194 | 0.0005 | 144 | 8  | 124 | 3 | 0.86 |
| 117SN-1-1-20 | 341  | 316 | 1.08 | 0.0543 | 0.0024 | 0.1503 | 0.0072 | 0.0202 | 0.0005 | 142 | 6  | 129 | 3 | 0.91 |
| 117SN-1-1-21 | 299  | 309 | 0.97 | 0.0499 | 0.0022 | 0.136  | 0.0063 | 0.0197 | 0.0005 | 129 | 6  | 126 | 3 | 0.98 |
| 117SN-1-1-22 | 954  | 462 | 2.06 | 0.0512 | 0.002  | 0.1362 | 0.0061 | 0.0193 | 0.0005 | 130 | 5  | 123 | 3 | 0.95 |
| 117SN-1-1-23 | 412  | 382 | 1.08 | 0.0509 | 0.0019 | 0.1368 | 0.0054 | 0.0195 | 0.0005 | 130 | 5  | 124 | 3 | 0.95 |
| 117SN-1-1-24 | 1058 | 390 | 2.72 | 0.0511 | 0.0021 | 0.134  | 0.0059 | 0.0191 | 0.0005 | 128 | 5  | 122 | 3 | 0.95 |
| 117SN-1-1-25 | 287  | 255 | 1.13 | 0.0571 | 0.0048 | 0.1548 | 0.013  | 0.0198 | 0.0006 | 146 | 11 | 127 | 4 | 0.87 |

N9, Zhenghe (Duan et al., 2013; Li et al., 2015)

|              |     |     |      |        |        |        |        |        |        |     |    |     |   |      |
|--------------|-----|-----|------|--------|--------|--------|--------|--------|--------|-----|----|-----|---|------|
| 117ZH-2-1-1  | 230 | 200 | 1.15 | 0.0524 | 0.0024 | 0.1599 | 0.0075 | 0.0221 | 0.0006 | 151 | 7  | 141 | 4 | 0.93 |
| 117ZH-2-1-2  | 195 | 274 | 0.71 | 0.0519 | 0.002  | 0.1605 | 0.0066 | 0.0224 | 0.0006 | 151 | 6  | 143 | 4 | 0.95 |
| 117ZH-2-1-3  | 357 | 262 | 1.36 | 0.0466 | 0.002  | 0.1439 | 0.0063 | 0.0225 | 0.0006 | 137 | 6  | 143 | 4 | 1.04 |
| 117ZH-2-1-4  | 210 | 220 | 0.95 | 0.0495 | 0.0021 | 0.1469 | 0.0065 | 0.0216 | 0.0006 | 139 | 6  | 138 | 4 | 0.99 |
| 117ZH-2-1-5  | 177 | 196 | 0.9  | 0.0522 | 0.0026 | 0.161  | 0.0081 | 0.0225 | 0.0006 | 152 | 7  | 144 | 4 | 0.95 |
| 117ZH-2-1-6  | 160 | 160 | 1    | 0.0473 | 0.0026 | 0.1421 | 0.0076 | 0.0221 | 0.0007 | 135 | 7  | 141 | 4 | 1.04 |
| 117ZH-2-1-7  | 130 | 157 | 0.83 | 0.0511 | 0.0023 | 0.1508 | 0.0067 | 0.0219 | 0.0006 | 143 | 6  | 140 | 4 | 0.98 |
| 117ZH-2-1-8  | 157 | 147 | 1.06 | 0.0517 | 0.0023 | 0.1565 | 0.0072 | 0.0221 | 0.0006 | 148 | 6  | 141 | 4 | 0.95 |
| 117ZH-2-1-9  | 194 | 187 | 1.03 | 0.0508 | 0.0022 | 0.1568 | 0.0069 | 0.0223 | 0.0006 | 148 | 6  | 142 | 4 | 0.96 |
| 117ZH-2-1-10 | 214 | 241 | 0.89 | 0.0484 | 0.002  | 0.1457 | 0.0064 | 0.0219 | 0.0006 | 138 | 6  | 139 | 4 | 1.01 |
| 117ZH-2-1-11 | 190 | 237 | 0.8  | 0.0486 | 0.0021 | 0.1469 | 0.0066 | 0.0218 | 0.0006 | 139 | 6  | 139 | 4 | 1.00 |
| 117ZH-2-1-12 | 171 | 235 | 0.73 | 0.0514 | 0.002  | 0.1532 | 0.0063 | 0.0216 | 0.0006 | 145 | 6  | 138 | 4 | 0.95 |
| 117ZH-2-1-13 | 320 | 330 | 0.97 | 0.05   | 0.0019 | 0.1495 | 0.0058 | 0.0217 | 0.0006 | 141 | 5  | 139 | 4 | 0.99 |
| 117ZH-2-1-14 | 223 | 216 | 1.03 | 0.0466 | 0.0019 | 0.1429 | 0.0061 | 0.0223 | 0.0006 | 136 | 5  | 142 | 4 | 1.04 |
| 117ZH-2-1-15 | 154 | 201 | 0.76 | 0.0479 | 0.0021 | 0.1432 | 0.0065 | 0.0217 | 0.0006 | 136 | 6  | 138 | 4 | 1.01 |
| 117ZH-2-1-16 | 234 | 205 | 1.14 | 0.0537 | 0.0022 | 0.1623 | 0.0071 | 0.0219 | 0.0006 | 153 | 6  | 140 | 4 | 0.92 |
| 117ZH-2-1-17 | 255 | 199 | 1.28 | 0.0496 | 0.0021 | 0.1544 | 0.0068 | 0.0226 | 0.0006 | 146 | 6  | 144 | 4 | 0.99 |
| 117ZH-2-1-18 | 168 | 216 | 0.78 | 0.0486 | 0.0022 | 0.1435 | 0.0066 | 0.0216 | 0.0006 | 136 | 6  | 138 | 4 | 1.01 |
| 117ZH-2-1-19 | 239 | 258 | 0.93 | 0.0488 | 0.002  | 0.1419 | 0.0058 | 0.0212 | 0.0006 | 135 | 5  | 135 | 4 | 1.00 |
| 117ZH-2-1-20 | 135 | 132 | 1.02 | 0.0474 | 0.0024 | 0.1431 | 0.0068 | 0.0225 | 0.0007 | 136 | 6  | 143 | 4 | 1.05 |
| 117ZH-2-1-21 | 106 | 121 | 0.87 | 0.0548 | 0.0045 | 0.1666 | 0.0143 | 0.0223 | 0.0006 | 156 | 12 | 142 | 4 | 0.91 |
| 117ZH-2-1-22 | 308 | 425 | 0.73 | 0.0502 | 0.0018 | 0.151  | 0.0056 | 0.0219 | 0.0006 | 143 | 5  | 140 | 4 | 0.98 |
| 117ZH-2-1-23 | 110 | 143 | 0.77 | 0.0481 | 0.0023 | 0.1416 | 0.0071 | 0.0215 | 0.0006 | 134 | 6  | 137 | 4 | 1.02 |
| 117ZH-2-1-24 | 227 | 262 | 0.87 | 0.048  | 0.002  | 0.1429 | 0.0061 | 0.0218 | 0.0006 | 136 | 5  | 139 | 4 | 1.02 |
| 117ZH-2-1-25 | 391 | 302 | 1.29 | 0.0496 | 0.0021 | 0.152  | 0.0065 | 0.0224 | 0.0006 | 144 | 6  | 143 | 4 | 0.99 |

|          |      |     |      |       |        |      |        |       |         |     |    |     |     |      |
|----------|------|-----|------|-------|--------|------|--------|-------|---------|-----|----|-----|-----|------|
| ZK701-1  | 39.1 | 243 | 0.16 | 0.045 | 0.0018 | 0.17 | 0.0119 | 0.027 | 0.00029 | 158 | 10 | 172 | 1.8 | 1.09 |
| ZK701-2  | 87.6 | 465 | 0.19 | 0.048 | 0.0013 | 0.18 | 0.0111 | 0.028 | 0.00029 | 172 | 10 | 176 | 1.8 | 1.02 |
| ZK701-3  | 68.7 | 315 | 0.22 | 0.048 | 0.002  | 0.18 | 0.0109 | 0.027 | 0.00033 | 166 | 9  | 172 | 2.1 | 1.04 |
| ZK701-4  | 60.3 | 169 | 0.36 | 0.047 | 0.0027 | 0.17 | 0.0114 | 0.027 | 0.00037 | 161 | 10 | 172 | 2.3 | 1.07 |
| ZK701-5  | 71   | 390 | 0.18 | 0.048 | 0.0017 | 0.18 | 0.0082 | 0.027 | 0.00031 | 166 | 7  | 172 | 2   | 1.04 |
| ZK701-6  | 116  | 405 | 0.29 | 0.049 | 0.0017 | 0.19 | 0.0073 | 0.027 | 0.00026 | 173 | 6  | 174 | 1.6 | 1.01 |
| ZK701-7  | 134  | 802 | 0.17 | 0.047 | 0.0014 | 0.17 | 0.0056 | 0.027 | 0.00023 | 162 | 5  | 170 | 1.4 | 1.05 |
| ZK701-8  | 72.5 | 359 | 0.2  | 0.049 | 0.0018 | 0.19 | 0.007  | 0.027 | 0.00032 | 174 | 6  | 175 | 2   | 1.00 |
| ZK701-9  | 56.3 | 186 | 0.3  | 0.051 | 0.0023 | 0.19 | 0.0084 | 0.027 | 0.00035 | 178 | 7  | 174 | 2.2 | 0.98 |
| ZK701-10 | 131  | 386 | 0.34 | 0.05  | 0.0019 | 0.19 | 0.0069 | 0.027 | 0.00027 | 176 | 6  | 175 | 1.7 | 0.99 |
| ZK701-11 | 113  | 425 | 0.27 | 0.051 | 0.0019 | 0.19 | 0.0073 | 0.027 | 0.0003  | 180 | 6  | 175 | 1.9 | 0.97 |
| ZK701-12 | 71.4 | 274 | 0.26 | 0.054 | 0.0023 | 0.2  | 0.0086 | 0.027 | 0.00031 | 188 | 7  | 174 | 2   | 0.93 |
| ZK701-13 | 77   | 264 | 0.29 | 0.052 | 0.0023 | 0.2  | 0.0085 | 0.027 | 0.0003  | 182 | 7  | 173 | 1.9 | 0.95 |
| ZK701-14 | 110  | 611 | 0.18 | 0.05  | 0.0014 | 0.19 | 0.0055 | 0.028 | 0.00027 | 177 | 5  | 175 | 1.7 | 0.99 |

|          |      |     |      |       |        |      |        |       |         |  |     |   |     |     |      |
|----------|------|-----|------|-------|--------|------|--------|-------|---------|--|-----|---|-----|-----|------|
| ZK701-15 | 39.7 | 179 | 0.22 | 0.046 | 0.0021 | 0.17 | 0.0079 | 0.027 | 0.00035 |  | 163 | 7 | 175 | 2.2 | 1.07 |
| ZK701-16 | 38.7 | 190 | 0.2  | 0.048 | 0.0024 | 0.18 | 0.0089 | 0.027 | 0.00034 |  | 171 | 8 | 174 | 2.1 | 1.02 |
| ZK701-17 | 125  | 451 | 0.28 | 0.049 | 0.0016 | 0.18 | 0.0061 | 0.027 | 0.00027 |  | 171 | 5 | 173 | 1.7 | 1.01 |
| ZK701-18 | 55.6 | 358 | 0.16 | 0.049 | 0.0019 | 0.18 | 0.0067 | 0.027 | 0.0003  |  | 172 | 6 | 174 | 1.9 | 1.01 |
| ZK701-19 | 52.3 | 281 | 0.19 | 0.051 | 0.0018 | 0.2  | 0.0075 | 0.027 | 0.00034 |  | 182 | 6 | 174 | 2.1 | 0.96 |
| ZK701-20 | 65.9 | 235 | 0.28 | 0.054 | 0.0019 | 0.21 | 0.0091 | 0.027 | 0.00033 |  | 190 | 8 | 175 | 2.1 | 0.92 |
| ZK701-21 | 64.9 | 411 | 0.16 | 0.051 | 0.0015 | 0.2  | 0.0081 | 0.028 | 0.00025 |  | 181 | 7 | 176 | 1.6 | 0.97 |

N10, Fu'an (Li et al., 2009)

|                |     |     |      |        |     |       |     |        |     |  |       |      |  |      |     |      |     |
|----------------|-----|-----|------|--------|-----|-------|-----|--------|-----|--|-------|------|--|------|-----|------|-----|
| T204-9400-1.1  | 434 | 299 | 1.45 | 0.0405 | 13  | 0.14  | 13  | 0.0251 | 4   |  | 2318  | 330  |  | 160  | 6.3 | 149  | 7.8 |
| T204-9400-2.1  | 108 | 130 | 0.83 | 0.028  | 52  | 0.092 | 52  | 0.0239 | 4.6 |  | 21380 | 1700 |  | 152  | 7   | 137  | 22  |
| T204-9400-3.1  | 210 | 178 | 1.18 | 0.0432 | 12  | 0.152 | 13  | 0.0255 | 4.1 |  | 2154  | 310  |  | 162  | 6.6 | 151  | 9.7 |
| T204-9400-4.1  | 285 | 197 | 1.45 | 0.039  | 27  | 0.138 | 28  | 0.0256 | 4.4 |  | 2409  | 720  |  | 163  | 7   | 150  | 13  |
| T204-9400-5.1  | 76  | 76  | 1.00 | 0.074  | 54  | 0.22  | 55  | 0.0216 | 8.2 |  | 1030  | 1100 |  | 138  | 11  | 188  | 49  |
| T204-9400-6.1  | 491 | 455 | 1.08 | 0.0513 | 7.5 | 0.177 | 8.5 | 0.0251 | 4   |  | 253   | 170  |  | 160  | 6.3 | 158  | 7.9 |
| T204-9400-7.1  | 42  | 58  | 0.72 | 0.2665 | 0.8 | 23.47 | 4.1 | 0.639  | 4   |  | 3286  | 13   |  | 3184 | 100 | 3146 | 140 |
| T204-9400-8.1  | 370 | 309 | 1.20 | 0.0479 | 9   | 0.18  | 9.9 | 0.0272 | 4   |  | 92    | 210  |  | 173  | 6.8 | 164  | 8.5 |
| T204-9400-9.1  | 351 | 360 | 0.98 | 0.0435 | 9.7 | 0.128 | 10  | 0.0214 | 4   |  | 2141  | 240  |  | 137  | 5.4 | 131  | 8.6 |
| T204-9400-10.1 | 380 | 361 | 1.05 | 0.0499 | 7.3 | 0.158 | 8.3 | 0.0229 | 4   |  | 190   | 170  |  | 146  | 5.8 | 141  | 7.3 |
| T204-9400-11.1 | 573 | 444 | 1.29 | 0.0523 | 4.2 | 0.195 | 5.7 | 0.0271 | 3.9 |  | 298   | 96   |  | 172  | 6.7 | 171  | 7.4 |
| T204-9400-12.1 | 224 | 178 | 1.26 | 0.034  | 31  | 0.113 | 31  | 0.0239 | 4.5 |  | 2766  | 880  |  | 152  | 6.8 | 132  | 12  |
| T204-9400-13.1 | 201 | 200 | 1.01 | 0.045  | 5.5 | 0.153 | 6.8 | 0.0246 | 4.1 |  | 258   | 130  |  | 157  | 6.3 | 154  | 7.9 |
| T204-9400-14.1 | 209 | 236 | 0.89 | 0.0471 | 9   | 0.161 | 9.8 | 0.0248 | 4   |  | 52    | 210  |  | 158  | 6.3 | 164  | 9.1 |
| T204-9400-15.1 | 529 | 342 | 1.55 | 0.0543 | 8.6 | 0.197 | 10  | 0.0263 | 5.5 |  | 382   | 190  |  | 168  | 9.1 | 164  | 10  |
| T204-9400-16.1 | 397 | 242 | 1.64 | 0.0593 | 9.2 | 0.218 | 10  | 0.0267 | 4   |  | 578   | 200  |  | 170  | 6.8 | 169  | 8.3 |
| T204-9400-17.1 | 372 | 777 | 0.48 | 0.0541 | 4.1 | 0.197 | 5.6 | 0.0264 | 3.9 |  | 376   | 92   |  | 168  | 6.5 | 178  | 9.2 |

|                |     |     |      |        |     |       |     |        |      |  |       |      |  |      |     |      |     |
|----------------|-----|-----|------|--------|-----|-------|-----|--------|------|--|-------|------|--|------|-----|------|-----|
| T204-9401-1.1  | 328 | 319 | 1.03 | 0.0476 | 8.3 | 0.153 | 9.2 | 0.0234 | 4    |  | 80    | 200  |  | 149  | 6   | 146  | 7.9 |
| T204-9401-2.1  | 73  | 79  | 0.92 | 0.048  | 31  | 0.172 | 31  | 0.0262 | 5.1  |  | 80    | 730  |  | 167  | 8.4 | 171  | 23  |
| T204-9401-3.1  | 148 | 163 | 0.91 | 0.044  | 27  | 0.136 | 27  | 0.0224 | 4.4  |  | 2108  | 660  |  | 143  | 6.2 | 126  | 16  |
| T204-9401-4.1  | 387 | 344 | 1.13 | 0.0582 | 10  | 0.193 | 11  | 0.0241 | 4    |  | 536   | 230  |  | 153  | 6.1 | 157  | 9.4 |
| T204-9401-5.1  | 118 | 166 | 0.71 | 0.02   | 79  | 0.061 | 79  | 0.0223 | 4.6  |  | 22660 | 3500 |  | 142  | 6.4 | 115  | 24  |
| T204-9401-6.1  | 130 | 575 | 0.23 | 0.1128 | 0.5 | 5.27  | 3.9 | 0.339  | 3.8  |  | 1846  | 9.6  |  | 1881 | 63  | 1874 | 75  |
| T204-9401-7.1  | 135 | 145 | 0.93 | 0.043  | 51  | 0.131 | 51  | 0.0222 | 4.8  |  | 2180  | 1300 |  | 142  | 6.8 | 131  | 25  |
| T204-9401-8.1  | 328 | 217 | 1.51 | 0.054  | 9.5 | 0.181 | 10  | 0.0244 | 4.1  |  | 370   | 210  |  | 155  | 6.2 | 164  | 8.3 |
| T204-9401-9.1  | 184 | 209 | 0.88 | 0.0487 | 14  | 0.151 | 15  | 0.0225 | 4.4  |  | 132   | 340  |  | 143  | 6.3 | 134  | 11  |
| T204-9401-10.1 | 203 | 238 | 0.85 | 0.0219 | 9.5 | 140   | 13  |        |      |  |       |      |  |      |     |      |     |
| T204-9401-11.1 | 39  | 36  | 1.08 | 0.018  | 8.9 | 115   | 10  | 109    | 52   |  |       |      |  |      |     |      |     |
| T204-9401-12.1 | 500 | 822 | 0.61 | 0.0425 | 8.9 | 0.153 | 9.7 | 0.0262 | 3.9  |  | 2194  | 220  |  | 167  | 6.4 | 154  | 10  |
| T204-9401-13.1 | 203 | 134 | 1.51 | 0.035  | 30  | 0.117 | 30  | 0.0239 | 4.3  |  | 2670  | 830  |  | 152  | 6.5 | 154  | 11  |
| T204-9401-14.1 | 303 | 259 | 1.17 | 0.0233 | 4.5 | 149   | 6.6 | 24530  | 7900 |  |       |      |  | 119  | 16  |      |     |
| T204-9401-15.1 | 487 | 258 | 1.89 | 0.047  | 11  | 0.164 | 13  | 0.0253 | 6.5  |  | 50    | 260  |  | 161  | 10  | 153  | 11  |
| T204-9401-16.1 | 145 | 162 | 0.90 | 0.037  | 29  | 0.116 | 30  | 0.0227 | 4.3  |  | 2554  | 790  |  | 145  | 6.1 | 127  | 14  |
| T204-9401-17.1 | 213 | 253 | 0.84 | 0.0415 | 15  | 0.133 | 16  | 0.0232 | 4.1  |  | 2258  | 390  |  | 148  | 6.1 | 137  | 11  |

N11, Zherong (Liu et al., 2016)

|         |      |     |      |         |         |         |         |         |         |         |         |      |     |     |    |     |   |     |    |      |
|---------|------|-----|------|---------|---------|---------|---------|---------|---------|---------|---------|------|-----|-----|----|-----|---|-----|----|------|
| NY03-02 | 189  | 117 | 1.61 | 0.0642  | 0.00933 | 0.17203 | 0.02347 | 0.02053 | 0.00059 | 0.00478 | 0.00031 | 746  | 281 | 161 | 20 | 131 | 4 | 96  | 6  | 0.81 |
| NY03-03 | 140  | 162 | 0.86 | 0.07144 | 0.00641 | 0.19151 | 0.01489 | 0.02029 | 0.00053 | 0.00462 | 0.00027 | 970  | 183 | 178 | 13 | 129 | 3 | 93  | 6  | 0.72 |
| NY03-04 | 212  | 151 | 1.41 | 0.05309 | 0.00563 | 0.14436 | 0.01468 | 0.02037 | 0.00050 | 0.00457 | 0.00026 | 332  | 247 | 137 | 13 | 130 | 3 | 92  | 5  | 0.95 |
| NY03-06 | 148  | 179 | 0.83 | 0.05944 | 0.00366 | 0.15900 | 0.00902 | 0.02007 | 0.00029 | 0.00449 | 0.00023 | 583  | 140 | 150 | 8  | 128 | 2 | 90  | 5  | 0.85 |
| NY03-07 | 147  | 116 | 1.27 | 0.09778 | 0.01208 | 0.28245 | 0.04093 | 0.01990 | 0.00055 | 0.00579 | 0.00042 | 1583 | 233 | 253 | 32 | 127 | 3 | 117 | 9  | 0.50 |
| NY03-08 | 263  | 161 | 1.64 | 0.08690 | 0.00604 | 0.25493 | 0.02091 | 0.02066 | 0.00045 | 0.00525 | 0.00025 | 1358 | 134 | 231 | 17 | 132 | 3 | 106 | 5  | 0.57 |
| NY03-09 | 353  | 235 | 1.5  | 0.05372 | 0.00340 | 0.14903 | 0.00944 | 0.02024 | 0.00031 | 0.00478 | 0.00020 | 367  | 143 | 141 | 8  | 129 | 2 | 96  | 4  | 0.91 |
| NY03-10 | 121  | 98  | 1.24 | 0.07662 | 0.00497 | 0.20772 | 0.01372 | 0.02027 | 0.00043 | 0.00477 | 0.00023 | 1122 | 130 | 192 | 12 | 129 | 3 | 96  | 5  | 0.67 |
| NY03-11 | 325  | 325 | 1    | 0.05400 | 0.00261 | 0.14868 | 0.00702 | 0.02022 | 0.00026 | 0.00481 | 0.00018 | 372  | 109 | 141 | 6  | 129 | 2 | 97  | 4  | 0.91 |
| NY03-12 | 121  | 87  | 1.4  | 0.07761 | 0.00559 | 0.19957 | 0.01223 | 0.02020 | 0.00042 | 0.00468 | 0.00020 | 1137 | 143 | 185 | 10 | 129 | 3 | 94  | 4  | 0.70 |
| NY03-13 | 84   | 65  | 1.3  | 0.10806 | 0.01120 | 0.28957 | 0.02547 | 0.02053 | 0.00061 | 0.00574 | 0.00038 | 1769 | 191 | 258 | 20 | 131 | 4 | 116 | 8  | 0.51 |
| NY03-14 | 130  | 90  | 1.45 | 0.06672 | 0.00750 | 0.19551 | 0.02502 | 0.02053 | 0.00069 | 0.00490 | 0.00033 | 828  | 236 | 181 | 21 | 131 | 4 | 99  | 7  | 0.72 |
| NY03-15 | 477  | 192 | 2.48 | 0.04925 | 0.00824 | 0.13793 | 0.02259 | 0.02059 | 0.00080 | 0.00483 | 0.00031 | 167  | 343 | 131 | 20 | 131 | 5 | 97  | 6  | 1.00 |
| NY03-16 | 281  | 250 | 1.13 | 0.04889 | 0.00384 | 0.13704 | 0.01006 | 0.02053 | 0.00042 | 0.00458 | 0.00024 | 143  | 174 | 130 | 9  | 131 | 3 | 92  | 5  | 1.01 |
| NY03-17 | 183  | 164 | 1.12 | 0.05496 | 0.00646 | 0.14919 | 0.01573 | 0.02062 | 0.00055 | 0.00434 | 0.00028 | 409  | 265 | 141 | 14 | 132 | 3 | 88  | 6  | 0.94 |
| NY03-18 | 172  | 106 | 1.62 | 0.06947 | 0.00778 | 0.20021 | 0.02677 | 0.02044 | 0.00101 | 0.00480 | 0.00037 | 922  | 231 | 185 | 23 | 130 | 6 | 97  | 8  | 0.70 |
| NY03-19 | 291  | 185 | 1.58 | 0.05237 | 0.00360 | 0.14652 | 0.01081 | 0.02061 | 0.00056 | 0.00485 | 0.00020 | 302  | 125 | 139 | 10 | 132 | 4 | 98  | 4  | 0.95 |
| NY03-20 | 162  | 119 | 1.36 | 0.06905 | 0.00462 | 0.18877 | 0.01168 | 0.02057 | 0.00044 | 0.00508 | 0.00024 | 902  | 133 | 176 | 10 | 131 | 3 | 102 | 5  | 0.74 |
| NY04-01 | 422  | 231 | 1.83 | 0.05685 | 0.00365 | 0.15886 | 0.00955 | 0.02048 | 0.00032 | 0.00513 | 0.00020 | 487  | 138 | 150 | 8  | 131 | 2 | 103 | 4  | 0.87 |
| NY04-03 | 243  | 117 | 2.08 | 0.05859 | 0.00437 | 0.15697 | 0.00990 | 0.02035 | 0.00052 | 0.00489 | 0.00021 | 554  | 158 | 148 | 9  | 130 | 3 | 99  | 4  | 0.88 |
| NY04-06 | 268  | 207 | 1.29 | 0.05565 | 0.00562 | 0.14201 | 0.01154 | 0.01976 | 0.00055 | 0.00487 | 0.00026 | 439  | 228 | 135 | 10 | 126 | 3 | 98  | 5  | 0.93 |
| NY04-07 | 197  | 118 | 1.67 | 0.05713 | 0.00636 | 0.15452 | 0.01500 | 0.02051 | 0.00070 | 0.00480 | 0.00027 | 498  | 246 | 146 | 13 | 131 | 4 | 97  | 5  | 0.90 |
| NY04-08 | 400  | 176 | 2.27 | 0.04905 | 0.00375 | 0.13376 | 0.00964 | 0.02040 | 0.00047 | 0.00492 | 0.00020 | 150  | 170 | 127 | 9  | 130 | 3 | 99  | 4  | 1.02 |
| NY04-09 | 264  | 278 | 0.95 | 0.05319 | 0.00336 | 0.14514 | 0.00935 | 0.02013 | 0.00041 | 0.00488 | 0.00021 | 345  | 144 | 138 | 8  | 128 | 3 | 98  | 4  | 0.93 |
| NY04-10 | 173  | 104 | 1.66 | 0.06163 | 0.00545 | 0.15897 | 0.01168 | 0.01980 | 0.00054 | 0.00481 | 0.00021 | 661  | 190 | 150 | 10 | 126 | 3 | 97  | 4  | 0.84 |
| NY04-13 | 464  | 323 | 1.43 | 0.05283 | 0.00350 | 0.14405 | 0.00966 | 0.01993 | 0.00031 | 0.00508 | 0.00022 | 320  | 150 | 137 | 9  | 127 | 2 | 102 | 4  | 0.93 |
| NY04-14 | 668  | 414 | 1.61 | 0.05669 | 0.00758 | 0.15466 | 0.01907 | 0.01998 | 0.00023 | 0.00439 | 0.00017 | 480  | 298 | 146 | 17 | 128 | 1 | 88  | 4  | 0.88 |
| NY04-15 | 1485 | 676 | 2.19 | 0.05238 | 0.00283 | 0.14665 | 0.00804 | 0.02041 | 0.00037 | 0.00409 | 0.00019 | 302  | 124 | 139 | 7  | 130 | 2 | 83  | 4  | 0.94 |
| NY04-16 | 300  | 227 | 1.32 | 0.05458 | 0.00315 | 0.14664 | 0.00847 | 0.01979 | 0.00030 | 0.00468 | 0.00022 | 394  | 130 | 139 | 8  | 126 | 2 | 94  | 4  | 0.91 |
| NY04-17 | 195  | 103 | 1.89 | 0.06527 | 0.00447 | 0.18087 | 0.01144 | 0.02034 | 0.00038 | 0.00475 | 0.00021 | 783  | 144 | 169 | 10 | 130 | 2 | 96  | 4  | 0.77 |
| NY04-20 | 560  | 398 | 1.41 | 0.05627 | 0.00257 | 0.15536 | 0.00699 | 0.02019 | 0.00025 | 0.00473 | 0.00017 | 465  | 97  | 147 | 6  | 129 | 2 | 95  | 3  | 0.88 |
| NY05-01 | 168  | 86  | 1.94 | 0.04692 | 0.01631 | 0.12960 | 0.04471 | 0.02004 | 0.00094 | 0.00402 | 0.00070 | 45   | 570 | 124 | 40 | 128 | 6 | 81  | 14 | 1.03 |
| NY05-02 | 231  | 105 | 2.19 | 0.04716 | 0.01030 | 0.13203 | 0.02862 | 0.02032 | 0.00069 | 0.00522 | 0.00068 | 57   | 375 | 126 | 26 | 130 | 4 | 105 | 14 | 1.03 |
| NY05-03 | 109  | 54  | 2.04 | 0.05136 | 0.01887 | 0.14415 | 0.05259 | 0.02035 | 0.00096 | 0.00409 | 0.00085 | 257  | 646 | 137 | 47 | 130 | 6 | 82  | 17 | 0.95 |
| NY05-04 | 112  | 47  | 2.41 | 0.04821 | 0.02604 | 0.13735 | 0.07375 | 0.02067 | 0.00128 | 0.00427 | 0.00086 | 110  | 942 | 131 | 66 | 132 | 8 | 86  | 17 | 1.01 |
| NY05-05 | 181  | 77  | 2.35 | 0.04843 | 0.00951 | 0.13502 | 0.02640 | 0.02022 | 0.00053 | 0.00541 | 0.00067 | 120  | 350 | 129 | 24 | 129 | 3 | 109 | 13 | 1.00 |
| NY05-06 | 140  | 59  | 2.38 | 0.04866 | 0.01765 | 0.13572 | 0.04894 | 0.02024 | 0.00090 | 0.00536 | 0.00095 | 131  | 610 | 129 | 44 | 129 | 6 | 108 | 19 | 1.00 |

|         |     |     |      |         |         |         |         |         |         |         |         |     |      |     |    |     |    |     |     |      |
|---------|-----|-----|------|---------|---------|---------|---------|---------|---------|---------|---------|-----|------|-----|----|-----|----|-----|-----|------|
| NY05-07 | 116 | 70  | 1.65 | 0.04717 | 0.01924 | 0.13365 | 0.05412 | 0.02054 | 0.00109 | 0.00535 | 0.00150 | 58  | 681  | 127 | 48 | 131 | 7  | 108 | 30  | 1.03 |
| NY05-08 | 187 | 151 | 1.23 | 0.04799 | 0.00657 | 0.13783 | 0.01868 | 0.02083 | 0.00054 | 0.00562 | 0.00110 | 99  | 274  | 131 | 17 | 133 | 3  | 113 | 22  | 1.02 |
| NY05-09 | 95  | 49  | 1.93 | 0.04662 | 0.03021 | 0.13097 | 0.08429 | 0.02036 | 0.00156 | 0.01045 | 0.00660 | 30  | 1006 | 125 | 76 | 130 | 40 | 210 | 132 | 1.04 |
| NY05-10 | 71  | 36  | 2.01 | 0.04887 | 0.03043 | 0.13554 | 0.08392 | 0.02011 | 0.00138 | 0.00404 | 0.00128 | 142 | 1022 | 129 | 75 | 128 | 9  | 81  | 26  | 0.99 |
| NY05-12 | 178 | 69  | 2.59 | 0.04977 | 0.02628 | 0.14220 | 0.07442 | 0.02072 | 0.00153 | 0.00480 | 0.00156 | 184 | 933  | 135 | 66 | 132 | 40 | 97  | 34  | 0.98 |
| NY05-15 | 530 | 367 | 1.45 | 0.05251 | 0.00479 | 0.14771 | 0.01326 | 0.02042 | 0.00052 | 0.00528 | 0.00104 | 308 | 209  | 140 | 12 | 130 | 3  | 106 | 21  | 0.93 |
| NY05-17 | 204 | 102 | 2    | 0.05046 | 0.01060 | 0.14050 | 0.02923 | 0.02019 | 0.00068 | 0.00639 | 0.00165 | 216 | 387  | 133 | 26 | 129 | 4  | 129 | 33  | 0.97 |
| NY05-18 | 348 | 459 | 0.76 | 0.04834 | 0.00442 | 0.13569 | 0.01218 | 0.02036 | 0.00051 | 0.00585 | 0.00153 | 116 | 206  | 129 | 11 | 130 | 3  | 118 | 31  | 1.01 |
| NY05-19 | 96  | 48  | 1.99 | 0.04810 | 0.01746 | 0.13610 | 0.04916 | 0.02052 | 0.00082 | 0.00593 | 0.00107 | 104 | 606  | 130 | 44 | 131 | 5  | 120 | 21  | 1.01 |
| NY05-20 | 291 | 117 | 2.49 | 0.04844 | 0.00857 | 0.13799 | 0.02420 | 0.02066 | 0.00061 | 0.00583 | 0.00108 | 121 | 326  | 131 | 22 | 132 | 4  | 117 | 22  | 1.01 |
| NY08-01 | 250 | 136 | 1.85 | 0.04978 | 0.00693 | 0.13900 | 0.01919 | 0.02025 | 0.00049 | 0.00633 | 0.00108 | 185 | 285  | 132 | 17 | 129 | 3  | 128 | 22  | 0.98 |
| NY08-02 | 452 | 367 | 1.23 | 0.04816 | 0.00258 | 0.13584 | 0.00729 | 0.02046 | 0.00034 | 0.00675 | 0.00087 | 107 | 120  | 129 | 7  | 131 | 2  | 136 | 17  | 1.02 |
| NY08-03 | 312 | 360 | 0.87 | 0.05044 | 0.00307 | 0.13738 | 0.00835 | 0.01976 | 0.00036 | 0.00557 | 0.00070 | 215 | 141  | 131 | 7  | 126 | 2  | 112 | 14  | 0.96 |
| NY08-04 | 120 | 56  | 2.14 | 0.04936 | 0.01472 | 0.13739 | 0.04077 | 0.02019 | 0.00067 | 0.00684 | 0.00109 | 165 | 504  | 131 | 36 | 129 | 4  | 138 | 22  | 0.98 |
| NY08-05 | 485 | 519 | 0.93 | 0.04688 | 0.00187 | 0.13223 | 0.00534 | 0.02046 | 0.00032 | 0.00671 | 0.00093 | 43  | 86   | 126 | 5  | 131 | 2  | 135 | 19  | 1.04 |
| NY08-06 | 204 | 129 | 1.59 | 0.04899 | 0.01453 | 0.13905 | 0.04076 | 0.02059 | 0.00100 | 0.00825 | 0.00273 | 147 | 500  | 132 | 36 | 131 | 6  | 166 | 55  | 0.99 |
| NY08-07 | 306 | 203 | 1.51 | 0.04653 | 0.00805 | 0.13150 | 0.02250 | 0.02050 | 0.00067 | 0.00335 | 0.00068 | 25  | 304  | 125 | 20 | 131 | 4  | 68  | 14  | 1.05 |
| NY08-09 | 167 | 94  | 1.79 | 0.04847 | 0.01143 | 0.13534 | 0.03169 | 0.02026 | 0.00067 | 0.00514 | 0.00112 | 122 | 410  | 129 | 28 | 129 | 4  | 104 | 23  | 1.00 |
| NY08-10 | 119 | 63  | 1.89 | 0.04853 | 0.01670 | 0.13943 | 0.04767 | 0.02084 | 0.00089 | 0.00730 | 0.00183 | 125 | 580  | 133 | 42 | 133 | 6  | 147 | 37  | 1.00 |
| NY08-12 | 297 | 159 | 1.86 | 0.04806 | 0.00622 | 0.13271 | 0.01705 | 0.02003 | 0.00048 | 0.00640 | 0.00097 | 102 | 261  | 127 | 15 | 128 | 3  | 129 | 19  | 1.01 |
| NY08-13 | 221 | 263 | 0.84 | 0.04758 | 0.00314 | 0.13523 | 0.00893 | 0.02062 | 0.00036 | 0.00681 | 0.00090 | 78  | 147  | 129 | 8  | 132 | 2  | 137 | 18  | 1.02 |
| NY08-15 | 153 | 124 | 1.23 | 0.04848 | 0.00734 | 0.13478 | 0.02029 | 0.02017 | 0.00050 | 0.00653 | 0.00104 | 123 | 292  | 128 | 18 | 129 | 3  | 132 | 21  | 1.01 |
| NY08-16 | 369 | 392 | 0.94 | 0.04956 | 0.00571 | 0.13715 | 0.01551 | 0.02007 | 0.00059 | 0.00349 | 0.00082 | 174 | 256  | 131 | 14 | 128 | 4  | 70  | 17  | 0.98 |
| NY08-18 | 427 | 433 | 0.98 | 0.05190 | 0.00210 | 0.14427 | 0.00590 | 0.02016 | 0.00032 | 0.00707 | 0.00122 | 281 | 95   | 137 | 5  | 129 | 2  | 142 | 24  | 0.94 |
| NY08-19 | 149 | 116 | 1.29 | 0.04742 | 0.00675 | 0.13533 | 0.01917 | 0.02070 | 0.00046 | 0.00699 | 0.00132 | 70  | 269  | 129 | 17 | 132 | 3  | 141 | 26  | 1.02 |
| NY08-20 | 475 | 474 | 1    | 0.05044 | 0.00248 | 0.14058 | 0.00685 | 0.02022 | 0.00035 | 0.00838 | 0.00226 | 215 | 115  | 134 | 6  | 129 | 2  | 169 | 45  | 0.96 |
| NY09-01 | 267 | 105 | 2.54 | 0.05047 | 0.01487 | 0.13998 | 0.04084 | 0.02012 | 0.00092 | 0.00682 | 0.00151 | 217 | 511  | 133 | 36 | 128 | 6  | 137 | 30  | 0.96 |
| NY09-02 | 117 | 74  | 1.57 | 0.04797 | 0.01677 | 0.13522 | 0.04695 | 0.02045 | 0.00093 | 0.00724 | 0.00156 | 98  | 581  | 129 | 42 | 130 | 6  | 146 | 31  | 1.01 |
| NY09-03 | 365 | 272 | 1.34 | 0.04912 | 0.00557 | 0.14025 | 0.01571 | 0.02071 | 0.00054 | 0.00477 | 0.00085 | 154 | 251  | 133 | 14 | 132 | 3  | 96  | 17  | 0.99 |
| NY09-04 | 151 | 146 | 1.03 | 0.04864 | 0.00537 | 0.13603 | 0.01495 | 0.02029 | 0.00040 | 0.00720 | 0.00103 | 131 | 244  | 130 | 13 | 129 | 3  | 145 | 21  | 0.99 |
| NY09-05 | 597 | 151 | 3.96 | 0.04699 | 0.00969 | 0.12981 | 0.02650 | 0.02004 | 0.00069 | 0.00352 | 0.00060 | 49  | 354  | 124 | 24 | 128 | 4  | 71  | 12  | 1.03 |
| NY09-06 | 410 | 141 | 2.92 | 0.04795 | 0.00625 | 0.13605 | 0.01760 | 0.02058 | 0.00048 | 0.00694 | 0.00130 | 97  | 260  | 130 | 16 | 131 | 3  | 140 | 26  | 1.01 |
| NY09-08 | 139 | 75  | 1.86 | 0.04700 | 0.01516 | 0.13378 | 0.04289 | 0.02065 | 0.00083 | 0.00823 | 0.00206 | 49  | 527  | 127 | 38 | 132 | 5  | 166 | 41  | 1.04 |
| NY09-09 | 329 | 199 | 1.65 | 0.04721 | 0.00416 | 0.13414 | 0.01176 | 0.02061 | 0.00039 | 0.00767 | 0.00147 | 60  | 195  | 128 | 11 | 132 | 2  | 154 | 29  | 1.03 |
| NY09-10 | 120 | 78  | 1.54 | 0.04768 | 0.02162 | 0.13662 | 0.06149 | 0.02079 | 0.00123 | 0.00386 | 0.00111 | 83  | 775  | 130 | 55 | 133 | 8  | 78  | 22  | 1.02 |
| NY09-11 | 252 | 122 | 2.07 | 0.05115 | 0.00675 | 0.14187 | 0.01862 | 0.02012 | 0.00054 | 0.00664 | 0.00081 | 248 | 288  | 135 | 17 | 128 | 3  | 134 | 16  | 0.95 |
| NY09-12 | 168 | 70  | 2.39 | 0.04872 | 0.01490 | 0.13373 | 0.04058 | 0.01991 | 0.00084 | 0.00422 | 0.00077 | 134 | 517  | 127 | 36 | 127 | 5  | 85  | 15  | 1.00 |
| NY09-13 | 370 | 208 | 1.78 | 0.04963 | 0.00427 | 0.13631 | 0.01166 | 0.01992 | 0.00039 | 0.00714 | 0.00105 | 178 | 196  | 130 | 10 | 127 | 2  | 144 | 21  | 0.98 |
| NY09-15 | 381 | 209 | 1.83 | 0.05090 | 0.00447 | 0.14012 | 0.01224 | 0.01997 | 0.00040 | 0.00579 | 0.00077 | 236 | 201  | 133 | 11 | 127 | 3  | 117 | 15  | 0.95 |
| NY09-16 | 333 | 361 | 0.92 | 0.04998 | 0.00332 | 0.14063 | 0.00928 | 0.02041 | 0.00040 | 0.00637 | 0.00103 | 194 | 152  | 134 | 8  | 130 | 3  | 128 | 21  | 0.97 |
| NY09-17 | 120 | 88  | 1.37 | 0.05072 | 0.01479 | 0.14664 | 0.04237 | 0.02097 | 0.00090 | 0.00843 | 0.00269 | 228 | 509  | 139 | 38 | 134 | 6  | 170 | 54  | 0.96 |
| NY09-18 | 285 | 182 | 1.57 | 0.04912 | 0.00449 | 0.14115 | 0.01284 | 0.02085 | 0.00040 | 0.00655 | 0.00116 | 154 | 207  | 134 | 11 | 133 | 3  | 132 | 23  | 0.99 |
| NY09-19 | 384 | 134 | 2.86 | 0.04914 | 0.00574 | 0.13876 | 0.01614 | 0.02048 | 0.00042 | 0.00582 | 0.00089 | 155 | 253  | 132 | 14 | 131 | 3  | 117 | 18  | 0.99 |
| NY09-20 | 557 | 213 | 2.62 | 0.05086 | 0.00380 | 0.14214 | 0.01058 | 0.02027 | 0.00037 | 0.00587 | 0.00091 | 234 | 171  | 135 | 9  | 129 | 2  | 118 | 18  | 0.96 |
| NY10-01 | 215 | 151 | 1.42 | 0.04894 | 0.00812 | 0.13320 | 0.02187 | 0.01974 | 0.00057 | 0.00770 | 0.00193 | 145 | 312  | 127 | 20 | 126 | 4  | 155 | 39  | 0.99 |
| NY10-02 | 57  | 43  | 1.32 | 0.05008 | 0.01826 | 0.13531 | 0.04913 | 0.01960 | 0.00074 | 0.00654 | 0.00105 | 199 | 630  | 129 | 44 | 125 | 5  | 132 | 21  | 0.97 |
| NY10-03 | 501 | 395 | 1.27 | 0.05142 | 0.00233 | 0.14061 | 0.00640 | 0.01983 | 0.00032 | 0.00498 | 0.00051 | 260 | 107  | 134 | 6  | 127 | 2  | 100 | 10  | 0.95 |
| NY10-04 | 321 | 234 | 1.38 | 0.04929 | 0.00741 | 0.13467 | 0.01988 | 0.01982 | 0.00067 | 0.00112 | 0.00013 | 162 | 302  | 128 | 18 | 127 | 4  | 23  | 3   | 0.99 |
| NY10-05 | 364 | 172 | 2.12 | 0.04893 | 0.00488 | 0.13457 | 0.01333 | 0.01995 | 0.00040 | 0.00412 | 0.00044 | 144 | 223  | 128 | 12 | 127 | 3  | 83  | 9   | 0.99 |
| NY10-06 | 575 | 582 | 0.99 | 0.05076 | 0.00171 | 0.17543 | 0.00601 | 0.02507 | 0.00040 | 0.00535 | 0.00059 | 230 | 80   | 164 | 5  | 160 | 3  | 108 | 12  | 0.98 |
| NY10-07 | 820 | 361 | 2.27 | 0.04846 | 0.00257 | 0.13421 | 0.00714 | 0.02009 | 0.00033 | 0.00586 | 0.00081 | 122 | 120  | 128 | 6  | 128 | 2  | 118 | 16  | 1.00 |
| NY10-08 | 196 | 153 | 1.28 | 0.04830 | 0.00537 | 0.13327 | 0.01474 | 0.02002 | 0.00041 | 0.00571 | 0.00082 | 114 | 240  | 127 | 13 | 128 | 3  | 115 | 16  | 1.01 |
| NY10-09 | 69  | 45  | 1.54 | 0.05019 | 0.01706 | 0.14145 | 0.04785 | 0.02044 | 0.00074 | 0.00789 | 0.00148 | 204 | 586  | 134 | 43 | 130 | 5  | 159 | 30  | 0.97 |
| NY10-10 | 728 | 499 | 1.46 | 0.04820 | 0.00180 | 0.14951 | 0.00567 | 0.02250 | 0.00035 | 0.00505 | 0.00065 | 109 | 85   | 141 | 5  | 143 | 2  | 102 | 13  | 1.01 |
| NY10-11 | 120 | 72  | 1.66 | 0.04775 | 0.01077 | 0.13464 | 0.03023 | 0.02045 | 0.00057 | 0.00613 | 0.00079 | 87  | 389  | 128 | 27 | 130 | 4  | 124 | 16  | 1.02 |
| NY10-12 | 404 | 256 | 1.57 | 0.05050 | 0.00329 | 0.14053 | 0.00915 | 0.02018 | 0.00035 | 0.00580 | 0.00063 | 218 | 149  | 134 | 8  | 129 | 2  | 117 | 13  | 0.96 |
| NY10-13 | 73  | 46  | 1.58 | 0.04854 | 0.01730 | 0.13709 | 0.04865 | 0.02049 | 0.00076 | 0.00666 | 0.00103 | 126 | 601  | 130 | 43 | 131 | 5  | 134 | 21  | 1.01 |
| NY10-14 | 131 | 102 | 1.28 | 0.05252 | 0.00809 | 0.14760 | 0.02260 | 0.02039 | 0.00050 | 0.00558 | 0.00069 | 308 | 324  | 140 | 20 | 130 | 3  | 112 | 14  | 0.93 |
| NY10-15 | 211 | 148 | 1.43 | 0.05053 | 0.00717 | 0.15412 | 0.02166 | 0.02212 | 0.00060 | 0.00576 | 0.00090 | 219 | 294  | 146 | 19 | 141 | 4  | 116 | 18  | 0.97 |
| NY10-16 | 502 | 260 | 1.93 | 0.05453 | 0.00315 | 0.16610 | 0.00958 | 0.02209 | 0.00038 | 0.00779 | 0.00118 | 393 | 133  | 156 | 8  | 141 | 2  | 157 | 24  | 0.90 |
| NY10-17 | 134 | 124 | 2.54 | 0.05131 | 0.00777 |         |         |         |         |         |         |     |      |     |    |     |    |     |     |      |

|          |     |     |      |         |         |          |         |         |         |         |         |      |     |      |    |      |    |      |     |      |
|----------|-----|-----|------|---------|---------|----------|---------|---------|---------|---------|---------|------|-----|------|----|------|----|------|-----|------|
| SMS01-20 | 645 | 374 | 1.73 | 0.04624 | 0.00251 | 0.12778  | 0.00695 | 0.02004 | 0.00033 | 0.00832 | 0.00199 | 10   | 118 | 122  | 6  | 128  | 2  | 167  | 40  | 1.05 |
| SMS03-01 | 762 | 235 | 3.24 | 0.04889 | 0.00412 | 0.13459  | 0.01123 | 0.01997 | 0.00039 | 0.00853 | 0.00181 | 143  | 190 | 128  | 10 | 127  | 2  | 172  | 36  | 0.99 |
| SMS03-02 | 176 | 99  | 1.78 | 0.04987 | 0.00840 | 0.13545  | 0.02267 | 0.01970 | 0.00048 | 0.00863 | 0.00162 | 189  | 320 | 129  | 20 | 126  | 3  | 174  | 32  | 0.98 |
| SMS03-03 | 135 | 100 | 1.35 | 0.04698 | 0.01229 | 0.12922  | 0.03355 | 0.01995 | 0.00073 | 0.00727 | 0.00183 | 48   | 431 | 123  | 30 | 127  | 5  | 146  | 37  | 1.03 |
| SMS03-05 | 87  | 74  | 1.18 | 0.04852 | 0.01782 | 0.13523  | 0.04936 | 0.02022 | 0.00092 | 0.00576 | 0.00157 | 125  | 617 | 129  | 44 | 129  | 6  | 116  | 32  | 1.00 |
| SMS03-06 | 189 | 116 | 1.62 | 0.05121 | 0.00999 | 0.13973  | 0.02705 | 0.01979 | 0.00061 | 0.00624 | 0.00127 | 250  | 367 | 133  | 24 | 126  | 4  | 126  | 26  | 0.95 |
| SMS03-07 | 576 | 392 | 1.47 | 0.04609 | 0.00243 | 0.12791  | 0.00675 | 0.02013 | 0.00033 | 0.00742 | 0.00142 | 2    | 114 | 122  | 6  | 128  | 2  | 149  | 28  | 1.05 |
| SMS03-09 | 86  | 99  | 0.87 | 0.05174 | 0.00790 | 0.14443  | 0.02192 | 0.02025 | 0.00047 | 0.00626 | 0.00138 | 274  | 315 | 137  | 19 | 129  | 3  | 126  | 28  | 0.94 |
| SMS03-10 | 57  | 46  | 1.23 | 0.05014 | 0.02374 | 0.13562  | 0.06384 | 0.01961 | 0.00106 | 0.00676 | 0.00286 | 201  | 842 | 129  | 57 | 125  | 7  | 136  | 57  | 0.97 |
| SMS03-11 | 137 | 91  | 1.51 | 0.04789 | 0.01351 | 0.13161  | 0.03686 | 0.01993 | 0.00078 | 0.00513 | 0.00113 | 94   | 470 | 126  | 33 | 127  | 5  | 103  | 23  | 1.01 |
| SMS03-12 | 124 | 92  | 1.34 | 0.04815 | 0.01528 | 0.13628  | 0.04289 | 0.02053 | 0.00092 | 0.00554 | 0.00135 | 107  | 532 | 130  | 38 | 131  | 6  | 112  | 27  | 1.01 |
| SMS03-13 | 236 | 154 | 1.54 | 0.05129 | 0.00723 | 0.14112  | 0.01971 | 0.01995 | 0.00052 | 0.00608 | 0.00108 | 254  | 301 | 134  | 18 | 127  | 3  | 123  | 22  | 0.95 |
| SMS03-15 | 204 | 121 | 1.68 | 0.04792 | 0.00629 | 0.13265  | 0.01734 | 0.02008 | 0.00042 | 0.00690 | 0.00112 | 95   | 262 | 126  | 16 | 128  | 3  | 139  | 22  | 1.02 |
| SMS03-16 | 402 | 199 | 0.51 | 0.10988 | 0.00216 | 0.389281 | 0.08143 | 0.25699 | 0.00366 | 0.05688 | 0.01093 | 1797 | 37  | 1612 | 17 | 1474 | 19 | 1118 | 209 | 0.91 |
| SMS03-17 | 475 | 368 | 1.29 | 0.05008 | 0.00329 | 0.13569  | 0.00884 | 0.01965 | 0.00037 | 0.00622 | 0.00135 | 199  | 150 | 129  | 8  | 125  | 2  | 125  | 27  | 0.97 |
| SMS03-18 | 171 | 114 | 1.51 | 0.04822 | 0.01317 | 0.13077  | 0.03542 | 0.01966 | 0.00079 | 0.00711 | 0.00243 | 110  | 459 | 125  | 32 | 126  | 5  | 143  | 49  | 1.01 |
| SMS03-19 | 218 | 111 | 1.97 | 0.05039 | 0.00723 | 0.13429  | 0.01916 | 0.01933 | 0.00043 | 0.00663 | 0.00125 | 213  | 294 | 128  | 17 | 123  | 3  | 134  | 25  | 0.96 |
| SMS03-20 | 108 | 79  | 1.35 | 0.05075 | 0.01335 | 0.13925  | 0.03633 | 0.01990 | 0.00075 | 0.00675 | 0.00199 | 229  | 468 | 132  | 32 | 127  | 5  | 136  | 40  | 0.96 |

# N12, Mingqing (Liu et al., 2016)

|         |     |     |      |         |         |         |         |         |         |         |         |      |     |      |    |      |    |      |     |      |
|---------|-----|-----|------|---------|---------|---------|---------|---------|---------|---------|---------|------|-----|------|----|------|----|------|-----|------|
| FK01-01 | 305 | 240 | 1.27 | 0.04914 | 0.00705 | 0.16421 | 0.02339 | 0.02424 | 0.00063 | 0.00581 | 0.00144 | 155  | 288 | 154  | 20 | 154  | 4  | 117  | 29  | 1.00 |
| FK01-02 | 828 | 586 | 1.41 | 0.04914 | 0.00302 | 0.16414 | 0.01009 | 0.02424 | 0.00047 | 0.00508 | 0.00095 | 155  | 140 | 154  | 9  | 154  | 3  | 102  | 19  | 1.00 |
| FK01-03 | 428 | 238 | 1.8  | 0.04914 | 0.00736 | 0.16649 | 0.02474 | 0.02458 | 0.00066 | 0.00684 | 0.00198 | 155  | 301 | 156  | 22 | 157  | 4  | 138  | 40  | 1.01 |
| FK01-04 | 398 | 280 | 1.42 | 0.04910 | 0.00698 | 0.16489 | 0.02322 | 0.02436 | 0.00069 | 0.00270 | 0.00042 | 153  | 285 | 155  | 20 | 155  | 4  | 54   | 8   | 1.00 |
| FK01-05 | 131 | 95  | 1.37 | 0.04780 | 0.01236 | 0.15734 | 0.04054 | 0.02387 | 0.00069 | 0.00606 | 0.00144 | 89   | 434 | 148  | 36 | 152  | 4  | 122  | 29  | 1.03 |
| FK01-06 | 279 | 255 | 1.09 | 0.05066 | 0.01172 | 0.16799 | 0.03836 | 0.02408 | 0.00104 | 0.00413 | 0.00129 | 225  | 420 | 158  | 33 | 153  | 7  | 83   | 26  | 0.97 |
| FK01-07 | 89  | 64  | 1.38 | 0.05086 | 0.01223 | 0.25716 | 0.06160 | 0.03667 | 0.00106 | 0.00528 | 0.00111 | 234  | 436 | 232  | 50 | 232  | 7  | 406  | 22  | 1.00 |
| FK01-08 | 151 | 173 | 0.88 | 0.04934 | 0.01165 | 0.16251 | 0.03806 | 0.02388 | 0.00084 | 0.00525 | 0.00196 | 164  | 415 | 153  | 33 | 152  | 5  | 106  | 39  | 0.99 |
| FK01-09 | 151 | 126 | 1.19 | 0.04891 | 0.01378 | 0.16273 | 0.04553 | 0.02413 | 0.00091 | 0.00519 | 0.00193 | 144  | 478 | 153  | 40 | 154  | 6  | 105  | 39  | 1.01 |
| FK01-10 | 133 | 120 | 1.11 | 0.05127 | 0.02826 | 0.16954 | 0.09257 | 0.02399 | 0.00186 | 0.00526 | 0.00442 | 253  | 980 | 159  | 80 | 153  | 12 | 406  | 89  | 0.96 |
| FK01-11 | 96  | 112 | 0.85 | 0.04885 | 0.01339 | 0.16469 | 0.04487 | 0.02449 | 0.00086 | 0.00749 | 0.00223 | 141  | 465 | 155  | 39 | 156  | 5  | 151  | 45  | 1.01 |
| FK01-12 | 284 | 193 | 1.47 | 0.04908 | 0.00868 | 0.15926 | 0.02800 | 0.02355 | 0.00067 | 0.00328 | 0.00057 | 152  | 327 | 150  | 25 | 150  | 4  | 66   | 11  | 1.00 |
| FK01-13 | 164 | 121 | 1.36 | 0.04937 | 0.01825 | 0.16269 | 0.05968 | 0.02390 | 0.00121 | 0.00542 | 0.00248 | 165  | 631 | 153  | 52 | 152  | 8  | 409  | 50  | 0.99 |
| FK01-14 | 147 | 130 | 1.13 | 0.11506 | 0.00237 | 0.35021 | 0.12337 | 0.33720 | 0.00542 | 0.06513 | 0.01235 | 1881 | 38  | 1877 | 20 | 1873 | 26 | 1275 | 234 | 1.00 |
| FK01-15 | 317 | 167 | 1.9  | 0.04866 | 0.02122 | 0.15969 | 0.06901 | 0.02383 | 0.00149 | 0.00290 | 0.00098 | 131  | 749 | 150  | 60 | 152  | 9  | 59   | 20  | 1.01 |
| FK01-16 | 129 | 106 | 1.22 | 0.04767 | 0.01946 | 0.15794 | 0.06406 | 0.02407 | 0.00119 | 0.00735 | 0.00468 | 83   | 686 | 149  | 56 | 153  | 7  | 148  | 94  | 1.03 |
| FK01-17 | 182 | 171 | 1.06 | 0.04889 | 0.00931 | 0.16433 | 0.03107 | 0.02437 | 0.00073 | 0.01018 | 0.00579 | 143  | 351 | 154  | 27 | 155  | 5  | 205  | 116 | 1.01 |
| FK01-18 | 172 | 188 | 0.92 | 0.04914 | 0.00629 | 0.16199 | 0.02068 | 0.02391 | 0.00052 | 0.00935 | 0.00385 | 155  | 266 | 152  | 18 | 152  | 3  | 188  | 77  | 1.00 |
| FK01-19 | 254 | 271 | 0.94 | 0.04904 | 0.00460 | 0.16157 | 0.01515 | 0.02390 | 0.00048 | 0.00775 | 0.00310 | 150  | 213 | 152  | 13 | 152  | 3  | 156  | 62  | 1.00 |
| FK01-20 | 253 | 227 | 1.11 | 0.04849 | 0.00525 | 0.16077 | 0.01736 | 0.02405 | 0.00050 | 0.00532 | 0.00136 | 123  | 239 | 151  | 15 | 153  | 3  | 107  | 27  | 1.01 |

|         |      |     |      |         |         |         |         |         |         |         |         |     |     |     |    |     |   |     |     |      |
|---------|------|-----|------|---------|---------|---------|---------|---------|---------|---------|---------|-----|-----|-----|----|-----|---|-----|-----|------|
| FK02-01 | 553  | 322 | 1.72 | 0.04894 | 0.00445 | 0.16551 | 0.01498 | 0.02453 | 0.00053 | 0.00242 | 0.00023 | 145 | 206 | 156 | 13 | 156 | 3 | 49  | 5   | 1.00 |
| FK02-02 | 732  | 646 | 1.13 | 0.04944 | 0.00212 | 0.16721 | 0.00732 | 0.02454 | 0.00042 | 0.00739 | 0.00158 | 169 | 100 | 157 | 6  | 156 | 3 | 149 | 32  | 0.99 |
| FK02-03 | 406  | 325 | 1.25 | 0.04972 | 0.00331 | 0.17074 | 0.01143 | 0.02491 | 0.00045 | 0.00572 | 0.00095 | 182 | 152 | 160 | 10 | 159 | 3 | 115 | 19  | 0.99 |
| FK02-04 | 329  | 184 | 1.79 | 0.04921 | 0.00657 | 0.16938 | 0.02252 | 0.02497 | 0.00056 | 0.01440 | 0.00723 | 158 | 272 | 159 | 20 | 159 | 4 | 289 | 144 | 1.00 |
| FK02-05 | 1017 | 533 | 1.91 | 0.04931 | 0.00403 | 0.16696 | 0.01347 | 0.02456 | 0.00055 | 0.02055 | 0.02287 | 163 | 185 | 157 | 12 | 156 | 3 | 411 | 453 | 0.99 |
| FK02-06 | 618  | 900 | 0.69 | 0.04926 | 0.00195 | 0.16668 | 0.00673 | 0.02455 | 0.00043 | 0.00416 | 0.00069 | 160 | 93  | 157 | 6  | 156 | 3 | 84  | 14  | 0.99 |
| FK02-07 | 595  | 547 | 1.09 | 0.04900 | 0.00236 | 0.16787 | 0.00818 | 0.02485 | 0.00044 | 0.00592 | 0.00134 | 148 | 110 | 158 | 7  | 158 | 3 | 119 | 27  | 1.00 |
| FK02-08 | 324  | 313 | 1.03 | 0.04916 | 0.00377 | 0.16628 | 0.01276 | 0.02454 | 0.00046 | 0.00743 | 0.00232 | 155 | 174 | 156 | 11 | 156 | 3 | 150 | 47  | 1.00 |
| FK02-09 | 733  | 394 | 1.86 | 0.04912 | 0.00438 | 0.16745 | 0.01484 | 0.02473 | 0.00056 | 0.00366 | 0.00076 | 154 | 202 | 157 | 13 | 157 | 4 | 74  | 15  | 1.00 |
| FK02-10 | 370  | 345 | 1.07 | 0.04866 | 0.00337 | 0.16459 | 0.01141 | 0.02454 | 0.00045 | 0.00751 | 0.00250 | 131 | 156 | 155 | 10 | 156 | 3 | 151 | 50  | 1.01 |
| FK02-11 | 694  | 338 | 2.06 | 0.04914 | 0.00683 | 0.16623 | 0.02281 | 0.02454 | 0.00071 | 0.00616 | 0.00288 | 155 | 281 | 156 | 20 | 156 | 4 | 124 | 58  | 1.00 |
| FK02-12 | 521  | 418 | 1.25 | 0.04921 | 0.00323 | 0.16742 | 0.01098 | 0.02468 | 0.00045 | 0.01014 | 0.00413 | 158 | 149 | 157 | 10 | 157 | 3 | 204 | 83  | 1.00 |
| FK02-13 | 544  | 431 | 1.26 | 0.04866 | 0.00397 | 0.16524 | 0.01340 | 0.02463 | 0.00050 | 0.00989 | 0.00507 | 131 | 184 | 155 | 12 | 157 | 3 | 199 | 101 | 1.01 |
| FK02-14 | 365  | 224 | 1.62 | 0.04904 | 0.00581 | 0.16706 | 0.01970 | 0.02471 | 0.00054 | 0.01246 | 0.00680 | 150 | 251 | 157 | 17 | 157 | 3 | 250 | 136 | 1.00 |
| FK02-15 | 895  | 380 | 2.35 | 0.04884 | 0.00680 | 0.16407 | 0.02253 | 0.02438 | 0.00072 | 0.00407 | 0.00145 | 140 | 279 | 154 | 20 | 155 | 5 | 82  | 29  | 1.01 |
| FK02-16 | 397  | 304 | 1.31 | 0.04885 | 0.00488 | 0.16617 | 0.01649 | 0.02468 | 0.00052 | 0.01322 | 0.00941 | 141 | 223 | 156 | 14 | 157 | 3 | 265 | 188 | 1.01 |
| FK02-17 | 435  | 289 | 1.51 | 0.04922 | 0.00440 | 0.16513 | 0.01471 | 0.02434 | 0.00047 | 0.00951 | 0.00446 | 158 | 203 | 155 | 13 | 155 | 3 | 191 | 89  | 1.00 |
| FK02-18 | 393  | 270 | 1.45 | 0.04924 | 0.01235 | 0.16723 | 0.04135 | 0.02464 | 0.00115 | 0.01464 | 0.03373 | 159 | 439 | 157 | 36 | 157 | 7 | 294 | 672 | 1.00 |
| FK02-19 | 588  | 377 | 1.56 | 0.04914 | 0.00392 | 0.16497 | 0.01309 | 0.02436 | 0.00048 | 0.00714 | 0.00321 | 155 | 181 | 155 | 11 | 155 | 3 | 144 | 64  | 1.00 |
| FK02-20 | 336  | 218 | 1.54 | 0.04878 | 0.00913 | 0.16619 | 0.03078 | 0.02471 | 0.00081 | 0.00186 | 0.00051 | 137 | 345 | 156 | 27 | 157 | 5 | 38  | 10  | 1.01 |

|         |     |     |     |         |         |         |         |         |         |         |         |     |     |     |    |     |   |     |    |      |
|---------|-----|-----|-----|---------|---------|---------|---------|---------|---------|---------|---------|-----|-----|-----|----|-----|---|-----|----|------|
| FK03-01 | 120 | 150 | 0.8 | 0.04932 | 0.01038 | 0.16858 | 0.03529 | 0.02480 | 0.00071 | 0.00707 | 0.00358 | 163 | 378 | 158 | 31 | 158 | 4 | 142 | 72 | 1.00 |
|---------|-----|-----|-----|---------|---------|---------|---------|---------|---------|---------|---------|-----|-----|-----|----|-----|---|-----|----|------|

|         |     |     |      |         |         |         |         |         |         |         |         |     |     |     |    |     |   |     |     |      |
|---------|-----|-----|------|---------|---------|---------|---------|---------|---------|---------|---------|-----|-----|-----|----|-----|---|-----|-----|------|
| NY11-03 | 619 | 451 | 1.38 | 0.04879 | 0.00189 | 0.14547 | 0.00567 | 0.02161 | 0.00033 | 0.00606 | 0.00065 | 138 | 90  | 138 | 5  | 138 | 2 | 122 | 13  | 1.00 |
| NY11-04 | 381 | 420 | 0.91 | 0.04851 | 0.00201 | 0.14553 | 0.00607 | 0.02176 | 0.00034 | 0.00598 | 0.00064 | 124 | 95  | 138 | 5  | 139 | 2 | 121 | 13  | 1.01 |
| NY11-05 | 161 | 203 | 0.79 | 0.04704 | 0.00652 | 0.13959 | 0.01905 | 0.02149 | 0.00061 | 0.00573 | 0.00148 | 51  | 262 | 133 | 17 | 137 | 4 | 115 | 30  | 1.03 |
| NY11-06 | 393 | 287 | 1.37 | 0.04750 | 0.00261 | 0.14194 | 0.00780 | 0.02167 | 0.00036 | 0.00623 | 0.00072 | 74  | 122 | 135 | 7  | 138 | 2 | 126 | 14  | 1.02 |
| NY11-07 | 177 | 146 | 1.21 | 0.04868 | 0.00647 | 0.14858 | 0.01953 | 0.02214 | 0.00056 | 0.00586 | 0.00113 | 132 | 271 | 141 | 17 | 141 | 4 | 118 | 23  | 1.00 |
| NY11-08 | 149 | 176 | 0.84 | 0.04871 | 0.00589 | 0.15013 | 0.01793 | 0.02236 | 0.00057 | 0.00691 | 0.00139 | 134 | 256 | 142 | 16 | 143 | 4 | 139 | 28  | 1.01 |
| NY11-09 | 515 | 453 | 1.14 | 0.04784 | 0.00179 | 0.14414 | 0.00547 | 0.02186 | 0.00034 | 0.00619 | 0.00082 | 91  | 85  | 137 | 5  | 139 | 2 | 125 | 16  | 1.01 |
| NY11-10 | 159 | 149 | 1.06 | 0.04958 | 0.00463 | 0.14990 | 0.01390 | 0.02193 | 0.00042 | 0.00677 | 0.00106 | 175 | 212 | 142 | 12 | 140 | 3 | 136 | 21  | 0.99 |
| NY11-11 | 252 | 255 | 0.99 | 0.04840 | 0.00593 | 0.14471 | 0.01750 | 0.02168 | 0.00058 | 0.00609 | 0.00116 | 119 | 254 | 137 | 16 | 138 | 4 | 123 | 23  | 1.01 |
| NY11-12 | 216 | 219 | 0.98 | 0.04959 | 0.00524 | 0.14806 | 0.01546 | 0.02166 | 0.00050 | 0.00605 | 0.00111 | 176 | 237 | 140 | 14 | 138 | 3 | 122 | 22  | 0.99 |
| NY11-13 | 311 | 355 | 0.88 | 0.04935 | 0.00327 | 0.14687 | 0.00969 | 0.02160 | 0.00041 | 0.00652 | 0.00093 | 164 | 151 | 139 | 9  | 138 | 3 | 131 | 19  | 0.99 |
| NY11-14 | 268 | 231 | 1.16 | 0.04867 | 0.00488 | 0.14617 | 0.01449 | 0.02178 | 0.00048 | 0.00630 | 0.00128 | 132 | 224 | 139 | 13 | 139 | 3 | 127 | 26  | 1.00 |
| NY11-15 | 104 | 126 | 0.83 | 0.04910 | 0.00612 | 0.14761 | 0.01831 | 0.02181 | 0.00045 | 0.00663 | 0.00099 | 153 | 264 | 140 | 16 | 139 | 3 | 134 | 20  | 0.99 |
| NY11-16 | 250 | 325 | 0.77 | 0.04714 | 0.00277 | 0.14155 | 0.00829 | 0.02178 | 0.00036 | 0.00714 | 0.00121 | 56  | 129 | 134 | 7  | 139 | 2 | 144 | 24  | 1.04 |
| NY11-17 | 705 | 575 | 1.23 | 0.05034 | 0.00276 | 0.14978 | 0.00813 | 0.02158 | 0.00041 | 0.00683 | 0.00147 | 211 | 127 | 142 | 7  | 138 | 3 | 138 | 30  | 0.97 |
| NY11-18 | 467 | 344 | 1.36 | 0.04842 | 0.00807 | 0.14646 | 0.02391 | 0.02200 | 0.00088 | 0.00521 | 0.00243 | 120 | 309 | 139 | 21 | 140 | 6 | 105 | 49  | 1.01 |
| NY11-19 | 213 | 201 | 1.06 | 0.04867 | 0.00498 | 0.14479 | 0.01469 | 0.02158 | 0.00045 | 0.00791 | 0.00214 | 132 | 229 | 137 | 13 | 138 | 3 | 159 | 43  | 1.01 |
| NY11-20 | 300 | 283 | 1.06 | 0.04818 | 0.00919 | 0.14394 | 0.02695 | 0.02166 | 0.00089 | 0.01330 | 0.01168 | 108 | 341 | 137 | 24 | 138 | 6 | 267 | 233 | 1.01 |
| NY12-01 | 208 | 170 | 1.23 | 0.04986 | 0.00471 | 0.15669 | 0.01474 | 0.02280 | 0.00043 | 0.00660 | 0.00085 | 188 | 215 | 148 | 13 | 145 | 3 | 133 | 17  | 0.98 |
| NY12-02 | 336 | 226 | 1.49 | 0.04866 | 0.00340 | 0.15579 | 0.01087 | 0.02322 | 0.00040 | 0.00731 | 0.00091 | 131 | 158 | 147 | 10 | 148 | 3 | 147 | 18  | 1.01 |
| NY12-03 | 166 | 155 | 1.07 | 0.04829 | 0.00906 | 0.15761 | 0.02923 | 0.02369 | 0.00079 | 0.00779 | 0.00188 | 114 | 339 | 149 | 26 | 151 | 5 | 157 | 38  | 1.01 |
| NY12-04 | 108 | 93  | 1.16 | 0.04886 | 0.01063 | 0.15474 | 0.03342 | 0.02297 | 0.00072 | 0.00827 | 0.00207 | 141 | 387 | 146 | 29 | 146 | 5 | 166 | 41  | 1.00 |
| NY12-05 | 189 | 141 | 1.35 | 0.04998 | 0.00547 | 0.15675 | 0.01708 | 0.02275 | 0.00045 | 0.00666 | 0.00098 | 194 | 246 | 148 | 15 | 145 | 3 | 134 | 20  | 0.98 |
| NY12-06 | 102 | 89  | 1.14 | 0.04989 | 0.00979 | 0.15751 | 0.03073 | 0.02290 | 0.00065 | 0.00450 | 0.00080 | 190 | 363 | 149 | 27 | 146 | 4 | 91  | 16  | 0.98 |
| NY12-07 | 369 | 424 | 0.87 | 0.04789 | 0.00207 | 0.15539 | 0.00677 | 0.02354 | 0.00037 | 0.00629 | 0.00092 | 94  | 97  | 147 | 6  | 150 | 2 | 127 | 18  | 1.02 |
| NY12-08 | 176 | 143 | 1.23 | 0.04791 | 0.00724 | 0.15365 | 0.02302 | 0.02327 | 0.00063 | 0.00518 | 0.00095 | 95  | 284 | 145 | 20 | 148 | 4 | 104 | 19  | 1.02 |
| NY12-09 | 132 | 120 | 1.1  | 0.04784 | 0.00801 | 0.15284 | 0.02541 | 0.02318 | 0.00063 | 0.00656 | 0.00132 | 91  | 307 | 144 | 22 | 148 | 4 | 132 | 27  | 1.03 |
| NY12-10 | 201 | 249 | 0.81 | 0.04732 | 0.00421 | 0.15178 | 0.01334 | 0.02327 | 0.00050 | 0.00515 | 0.00106 | 65  | 197 | 143 | 12 | 148 | 3 | 104 | 21  | 1.03 |
| NY12-11 | 148 | 137 | 1.08 | 0.05219 | 0.00567 | 0.16698 | 0.01805 | 0.02321 | 0.00047 | 0.00621 | 0.00077 | 294 | 249 | 157 | 16 | 148 | 3 | 125 | 15  | 0.94 |
| NY12-12 | 100 | 80  | 1.26 | 0.04700 | 0.01060 | 0.15124 | 0.03394 | 0.02335 | 0.00068 | 0.00604 | 0.00090 | 49  | 379 | 143 | 30 | 149 | 4 | 122 | 18  | 1.04 |
| NY12-13 | 248 | 196 | 1.27 | 0.05102 | 0.00688 | 0.16228 | 0.02163 | 0.02309 | 0.00064 | 0.00636 | 0.00124 | 242 | 288 | 153 | 19 | 147 | 4 | 128 | 25  | 0.96 |
| NY12-14 | 340 | 403 | 0.84 | 0.04846 | 0.00326 | 0.15417 | 0.01033 | 0.02308 | 0.00046 | 0.00552 | 0.00090 | 122 | 151 | 146 | 9  | 147 | 3 | 111 | 18  | 1.01 |
| NY12-15 | 391 | 439 | 0.89 | 0.04884 | 0.00236 | 0.15753 | 0.00764 | 0.02340 | 0.00039 | 0.00660 | 0.00097 | 140 | 110 | 149 | 7  | 149 | 2 | 133 | 19  | 1.00 |
| NY12-16 | 180 | 116 | 1.55 | 0.04966 | 0.00832 | 0.15851 | 0.02635 | 0.02316 | 0.00063 | 0.00543 | 0.00094 | 179 | 318 | 149 | 23 | 148 | 4 | 109 | 19  | 0.99 |
| NY12-17 | 86  | 78  | 1.1  | 0.04658 | 0.01219 | 0.15360 | 0.04000 | 0.02392 | 0.00078 | 0.00745 | 0.00155 | 28  | 430 | 145 | 35 | 152 | 5 | 150 | 31  | 1.05 |
| NY12-18 | 206 | 145 | 1.42 | 0.04926 | 0.00573 | 0.15529 | 0.01795 | 0.02287 | 0.00048 | 0.00645 | 0.00117 | 160 | 255 | 147 | 16 | 146 | 3 | 130 | 23  | 0.99 |
| NY12-19 | 200 | 217 | 0.92 | 0.05070 | 0.00372 | 0.16074 | 0.01172 | 0.02300 | 0.00041 | 0.00681 | 0.00128 | 227 | 168 | 151 | 10 | 147 | 3 | 137 | 26  | 0.97 |
| NY12-20 | 180 | 108 | 1.67 | 0.05079 | 0.01428 | 0.16217 | 0.04517 | 0.02315 | 0.00100 | 0.00697 | 0.00268 | 231 | 496 | 153 | 39 | 148 | 6 | 140 | 54  | 0.97 |

NY13, Minhou (Guo et al., 2012; Liu et al., 2016)

|         |      |     |      |         |         |         |         |         |         |         |         |     |     |     |    |     |   |     |     |      |
|---------|------|-----|------|---------|---------|---------|---------|---------|---------|---------|---------|-----|-----|-----|----|-----|---|-----|-----|------|
| NY14-01 | 378  | 408 | 0.93 | 0.04836 | 0.01063 | 0.10284 | 0.02237 | 0.01543 | 0.00059 | 0.00231 | 0.00033 | 117 | 383 | 99  | 21 | 99  | 4 | 47  | 7   | 1.00 |
| NY14-02 | 523  | 521 | 1    | 0.04895 | 0.00404 | 0.10414 | 0.00858 | 0.01544 | 0.00030 | 0.00287 | 0.00030 | 145 | 187 | 101 | 8  | 99  | 2 | 58  | 6   | 0.98 |
| NY14-03 | 820  | 741 | 1.11 | 0.04610 | 0.00699 | 0.09911 | 0.01481 | 0.01560 | 0.00053 | 0.00108 | 0.00012 | 3   | 275 | 96  | 14 | 100 | 3 | 22  | 2   | 1.04 |
| NY14-04 | 289  | 304 | 0.95 | 0.04928 | 0.00669 | 0.10539 | 0.01425 | 0.01552 | 0.00034 | 0.00308 | 0.00043 | 161 | 277 | 102 | 13 | 99  | 2 | 62  | 9   | 0.97 |
| NY14-05 | 632  | 574 | 1.1  | 0.04788 | 0.00541 | 0.10035 | 0.01123 | 0.01521 | 0.00036 | 0.00402 | 0.00102 | 93  | 238 | 97  | 10 | 97  | 2 | 81  | 21  | 1.00 |
| NY14-06 | 464  | 463 | 1    | 0.04794 | 0.00457 | 0.10114 | 0.00962 | 0.01531 | 0.00030 | 0.00255 | 0.00030 | 96  | 212 | 98  | 9  | 98  | 2 | 51  | 6   | 1.00 |
| NY14-07 | 483  | 547 | 0.88 | 0.04792 | 0.00629 | 0.10172 | 0.01323 | 0.01540 | 0.00041 | 0.00300 | 0.00067 | 95  | 262 | 98  | 12 | 99  | 3 | 61  | 14  | 1.01 |
| NY14-08 | 356  | 317 | 1.12 | 0.04788 | 0.00672 | 0.09985 | 0.01396 | 0.01513 | 0.00034 | 0.00298 | 0.00050 | 93  | 279 | 97  | 13 | 97  | 2 | 60  | 10  | 1.00 |
| NY14-09 | 197  | 224 | 0.88 | 0.04799 | 0.00921 | 0.10028 | 0.01919 | 0.01516 | 0.00038 | 0.00243 | 0.00037 | 99  | 341 | 97  | 18 | 97  | 2 | 49  | 7   | 1.00 |
| NY14-10 | 598  | 602 | 0.99 | 0.04803 | 0.00438 | 0.10278 | 0.00932 | 0.01552 | 0.00034 | 0.00169 | 0.00021 | 101 | 202 | 99  | 9  | 99  | 2 | 34  | 4   | 1.00 |
| NY14-11 | 436  | 480 | 0.91 | 0.04670 | 0.00524 | 0.09938 | 0.01111 | 0.01544 | 0.00032 | 0.00413 | 0.00107 | 34  | 227 | 96  | 10 | 99  | 2 | 83  | 22  | 1.03 |
| NY14-12 | 400  | 443 | 0.9  | 0.04814 | 0.00514 | 0.10351 | 0.01102 | 0.01560 | 0.00032 | 0.00270 | 0.00043 | 106 | 236 | 100 | 10 | 100 | 2 | 54  | 9   | 1.00 |
| NY14-13 | 714  | 512 | 1.39 | 0.04752 | 0.00565 | 0.10321 | 0.01221 | 0.01575 | 0.00037 | 0.00324 | 0.00067 | 75  | 241 | 100 | 11 | 101 | 2 | 65  | 13  | 1.01 |
| NY14-14 | 1225 | 834 | 1.47 | 0.04763 | 0.00594 | 0.10040 | 0.01234 | 0.01529 | 0.00045 | 0.00194 | 0.00038 | 81  | 253 | 97  | 11 | 98  | 3 | 39  | 8   | 1.01 |
| NY14-15 | 262  | 237 | 1.11 | 0.04817 | 0.00213 | 0.09954 | 0.04533 | 0.01500 | 0.00097 | 0.00319 | 0.00186 | 108 | 793 | 96  | 42 | 96  | 6 | 64  | 37  | 1.00 |
| NY14-16 | 198  | 208 | 0.95 | 0.04796 | 0.01542 | 0.10327 | 0.03300 | 0.01562 | 0.00063 | 0.00819 | 0.00733 | 97  | 537 | 100 | 30 | 100 | 4 | 165 | 147 | 1.00 |
| NY14-17 | 418  | 334 | 1.25 | 0.04956 | 0.01230 | 0.10602 | 0.02606 | 0.01552 | 0.00061 | 0.01981 | 0.05082 | 174 | 437 | 102 | 24 | 99  | 4 | 396 | ### | 0.97 |
| NY14-18 | 422  | 441 | 0.96 | 0.04881 | 0.01030 | 0.10372 | 0.02158 | 0.01541 | 0.00061 | 0.00162 | 0.00043 | 139 | 376 | 100 | 20 | 99  | 4 | 33  | 9   | 0.99 |
| NY14-19 | 837  | 768 | 1.09 | 0.04625 | 0.00543 | 0.09751 | 0.01132 | 0.01529 | 0.00040 | 0.00378 | 0.00172 | 11  | 233 | 94  | 10 | 98  | 3 | 76  | 35  | 1.04 |
| NY14-20 | 251  | 248 | 1.01 | 0.04807 | 0.01376 | 0.10231 | 0.02909 | 0.01544 | 0.00059 | 0.00899 | 0.00837 | 103 | 478 | 99  | 27 | 99  | 4 | 181 | 168 | 1.00 |

|         |     |     |      |         |         |         |         |         |         |         |         |     |     |     |    |     |   |     |    |      |
|---------|-----|-----|------|---------|---------|---------|---------|---------|---------|---------|---------|-----|-----|-----|----|-----|---|-----|----|------|
| NY15-01 | 254 | 270 | 0.94 | 0.04804 | 0.00782 | 0.10369 | 0.01681 | 0.01566 | 0.00037 | 0.00300 | 0.00047 | 101 | 301 | 100 | 15 | 100 | 2 | 61  | 9  | 1.00 |
| NY15-02 | 344 | 358 | 0.96 | 0.04725 | 0.01287 | 0.10190 | 0.02749 | 0.01565 | 0.00066 | 0.00351 | 0.00123 | 62  | 451 | 99  | 25 | 100 | 4 | 71  | 25 | 1.01 |
| NY15-03 | 210 | 204 | 1.03 | 0.04778 | 0.01171 | 0.10558 | 0.02576 | 0.01602 | 0.00049 | 0.00469 | 0.00152 | 88  | 414 | 102 | 24 | 102 | 3 | 95  | 31 | 1.00 |
| NY15-04 | 262 | 235 | 1.12 | 0.04794 | 0.01020 | 0.10410 | 0.02204 | 0.01575 | 0.00045 | 0.00236 | 0.00036 | 96  | 369 | 101 | 20 | 101 | 3 | 48  | 7  | 1.00 |
| NY15-05 | 246 | 228 | 1.08 | 0.04898 | 0.01125 | 0.10866 | 0.02482 | 0.01609 | 0.00050 | 0.00609 | 0.00245 | 147 | 402 | 105 | 23 | 103 | 3 | 123 | 49 | 0.98 |
| NY15-06 | 314 | 321 | 0.98 | 0.04741 | 0.01281 | 0.10348 | 0.02775 | 0.01584 | 0.00063 | 0.00249 | 0.00087 | 70  | 447 | 100 | 26 | 101 | 4 | 50  | 18 | 1.01 |
| NY15-07 | 125 | 149 | 0.84 | 0.04874 | 0.01619 | 0.13871 | 0.04579 | 0.02065 | 0.00086 | 0.00521 | 0.00191 | 135 | 561 | 132 | 41 | 132 | 5 | 105 | 38 | 1.00 |
| NY15-08 | 243 | 233 | 1.05 | 0.04895 | 0.00945 | 0.10344 | 0.01989 | 0.01533 | 0.00039 | 0.00328 | 0.00092 | 145 | 352 | 100 | 18 | 98  | 2 | 66  | 19 | 0.98 |
| NY15-09 | 203 | 196 | 1.04 | 0.04755 | 0.01115 | 0.10201 | 0.02383 | 0.01556 | 0.00044 | 0.00269 | 0.00069 | 77  | 397 | 99  | 22 | 100 | 3 | 54  | 14 | 1.01 |
| NY15-10 | 177 | 171 | 1.03 | 0.04839 | 0.01405 | 0.10329 | 0.02985 | 0.01549 | 0.00053 | 0.00182 | 0.00036 | 118 | 487 | 100 | 27 | 99  | 3 | 37  | 7  | 0.99 |
| NY15-11 | 326 | 357 | 0.91 | 0.04648 | 0.01090 | 0.09928 | 0.02305 | 0.01549 | 0.00060 | 0.00092 | 0.00015 | 23  | 389 | 96  | 21 | 99  | 4 | 19  | 3  | 1.03 |
| NY15-12 | 221 | 237 | 0.93 | 0.04697 | 0.02739 | 0.09986 | 0.05779 | 0.01543 | 0.00116 | 0.00367 | 0.00212 | 48  | 960 | 97  | 53 | 99  | 7 | 74  | 43 | 1.02 |
| NY15-13 | 249 | 176 | 1.42 | 0.04879 | 0.01643 | 0.10707 | 0.03585 | 0.01592 | 0.00064 | 0.00250 | 0.00050 | 138 | 569 | 103 | 33 | 102 | 4 | 50  | 10 | 0.99 |
| NY15-14 | 177 | 176 | 1    | 0.04797 | 0.01386 | 0.10541 | 0.03033 | 0.01594 | 0.00053 | 0.00443 | 0.00124 | 98  | 483 | 102 | 28 | 102 | 3 | 89  | 25 | 1.00 |
| NY15-15 | 285 | 292 | 0.98 | 0.04965 | 0.02046 | 0.10577 | 0.04318 | 0.01544 | 0.00092 | 0.00423 | 0.00221 | 179 | 711 | 102 | 40 | 99  | 6 | 85  | 44 | 0.97 |
| NY15-16 | 316 | 251 | 1.26 | 0.04802 | 0.01226 | 0.10156 | 0.02579 | 0.01534 | 0.00051 | 0.00388 | 0.00135 | 100 | 430 | 98  | 24 | 98  | 3 | 78  | 27 | 1.00 |
| NY15-17 | 437 | 370 | 1.18 | 0.05224 | 0.00893 | 0.11101 | 0.01880 | 0.01541 | 0.00046 | 0.00546 | 0.00261 | 296 | 348 | 107 | 17 | 99  | 3 | 110 | 52 | 0.93 |
| NY15-18 | 316 | 257 | 1.23 | 0.04750 | 0.01231 | 0.10400 | 0.02677 | 0.01588 | 0.00056 | 0.00390 | 0.00147 | 74  | 432 | 100 | 25 | 102 | 4 | 79  | 30 | 1.02 |
| NY15-19 | 259 | 263 | 0.98 | 0.05156 | 0.00847 | 0.11093 | 0.01814 | 0.01561 | 0.00038 | 0.00298 | 0.00074 | 266 | 333 | 107 | 17 | 100 | 2 | 60  | 15 | 0.93 |
| NY15-20 | 181 | 155 | 1.17 | 0.04840 | 0.01507 | 0.10605 | 0.03288 | 0.01589 | 0.00054 | 0.00393 | 0.00165 | 119 | 523 | 102 | 30 | 102 | 3 | 79  | 33 | 1.00 |



|             |     |     |      |         |         |         |         |         |         |         |         |     |     |     |    |     |     |     |    |      |
|-------------|-----|-----|------|---------|---------|---------|---------|---------|---------|---------|---------|-----|-----|-----|----|-----|-----|-----|----|------|
| NY16-04     | 190 | 218 | 0.87 | 0.04825 | 0.01137 | 0.10680 | 0.02482 | 0.01605 | 0.00071 | 0.00738 | 0.00264 | 112 | 409 | 103 | 23 | 103 | 5   | 149 | 53 | 1.00 |
| NY16-05     | 296 | 353 | 0.84 | 0.04953 | 0.00300 | 0.11025 | 0.00666 | 0.01615 | 0.00028 | 0.00480 | 0.00066 | 173 | 138 | 106 | 6  | 103 | 2   | 97  | 13 | 0.97 |
| NY16-06     | 328 | 353 | 0.93 | 0.04531 | 0.00282 | 0.09594 | 0.00598 | 0.01536 | 0.00026 | 0.00497 | 0.00069 | -4  | 136 | 93  | 6  | 98  | 2   | 100 | 14 | 1.05 |
| NY16-07     | 359 | 352 | 1.02 | 0.05266 | 0.00566 | 0.11539 | 0.01216 | 0.01590 | 0.00043 | 0.00532 | 0.00163 | 314 | 246 | 111 | 11 | 102 | 3   | 107 | 33 | 0.92 |
| NY16-08     | 219 | 244 | 0.9  | 0.04793 | 0.00921 | 0.10092 | 0.01909 | 0.01527 | 0.00057 | 0.00656 | 0.00348 | 96  | 341 | 98  | 18 | 98  | 4   | 132 | 70 | 1.00 |
| NY16-09     | 343 | 370 | 0.93 | 0.04597 | 0.00471 | 0.09700 | 0.00978 | 0.01531 | 0.00037 | 0.00425 | 0.00115 | -4  | 210 | 94  | 9  | 98  | 2   | 86  | 23 | 1.04 |
| NY16-10     | 339 | 314 | 1.08 | 0.05032 | 0.00656 | 0.10826 | 0.01381 | 0.01561 | 0.00049 | 0.00659 | 0.00260 | 210 | 278 | 104 | 13 | 100 | 3   | 133 | 52 | 0.96 |
| NY16-11     | 534 | 506 | 1.05 | 0.04745 | 0.00238 | 0.09827 | 0.00495 | 0.01502 | 0.00025 | 0.00503 | 0.00070 | 72  | 111 | 95  | 5  | 96  | 2   | 101 | 14 | 1.01 |
| NY16-12     | 688 | 708 | 0.97 | 0.04960 | 0.00178 | 0.10630 | 0.00389 | 0.01554 | 0.00025 | 0.00504 | 0.00067 | 176 | 85  | 103 | 4  | 99  | 2   | 102 | 13 | 0.96 |
| NY16-13     | 274 | 286 | 0.96 | 0.04529 | 0.00374 | 0.09545 | 0.00788 | 0.01529 | 0.00028 | 0.00491 | 0.00070 | -5  | 179 | 93  | 7  | 98  | 2   | 99  | 14 | 1.05 |
| NY16-14     | 218 | 233 | 0.94 | 0.04682 | 0.00551 | 0.09696 | 0.01131 | 0.01502 | 0.00034 | 0.00574 | 0.00123 | 40  | 238 | 94  | 10 | 96  | 2   | 116 | 25 | 1.02 |
| NY16-15     | 246 | 263 | 0.93 | 0.04621 | 0.00417 | 0.09537 | 0.00856 | 0.01497 | 0.00028 | 0.00562 | 0.00104 | 9   | 197 | 92  | 8  | 96  | 2   | 113 | 21 | 1.04 |
| NY16-16     | 558 | 511 | 1.09 | 0.04767 | 0.00230 | 0.10268 | 0.00499 | 0.01562 | 0.00026 | 0.00510 | 0.00081 | 83  | 108 | 99  | 5  | 100 | 2   | 103 | 16 | 1.01 |
| NY16-17     | 360 | 325 | 1.11 | 0.04642 | 0.00341 | 0.09602 | 0.00702 | 0.01500 | 0.00027 | 0.00547 | 0.00103 | 19  | 163 | 93  | 7  | 96  | 2   | 110 | 21 | 1.03 |
| NY16-18     | 458 | 467 | 0.98 | 0.04821 | 0.00248 | 0.10378 | 0.00535 | 0.01561 | 0.00026 | 0.00542 | 0.00100 | 110 | 116 | 100 | 5  | 100 | 2   | 109 | 20 | 1.00 |
| NY16-19     | 431 | 430 | 1    | 0.04646 | 0.00472 | 0.09832 | 0.00985 | 0.01534 | 0.00038 | 0.00450 | 0.00122 | 22  | 213 | 95  | 9  | 98  | 2   | 91  | 25 | 1.03 |
| NY16-20     | 356 | 347 | 1.03 | 0.04795 | 0.00343 | 0.10242 | 0.00730 | 0.01549 | 0.00029 | 0.00513 | 0.00109 | 97  | 160 | 99  | 7  | 99  | 2   | 103 | 22 | 1.00 |
| NY17-01     | 796 | 697 | 1.14 | 0.04727 | 0.00181 | 0.10015 | 0.00390 | 0.01537 | 0.00024 | 0.00519 | 0.00066 | 63  | 85  | 97  | 4  | 98  | 2   | 105 | 13 | 1.01 |
| NY17-02     | 887 | 715 | 1.24 | 0.04903 | 0.00327 | 0.10066 | 0.00664 | 0.01489 | 0.00031 | 0.00438 | 0.00075 | 149 | 151 | 97  | 6  | 95  | 2   | 88  | 15 | 0.98 |
| NY17-03     | 406 | 422 | 0.96 | 0.04375 | 0.00272 | 0.09410 | 0.00585 | 0.01560 | 0.00026 | 0.00527 | 0.00073 | -84 | 135 | 91  | 5  | 100 | 2   | 106 | 15 | 1.10 |
| NY17-04     | 407 | 413 | 0.99 | 0.04389 | 0.00289 | 0.09388 | 0.00617 | 0.01552 | 0.00027 | 0.00499 | 0.00070 | -76 | 143 | 91  | 6  | 99  | 2   | 101 | 14 | 1.09 |
| NY17-05     | 360 | 378 | 0.95 | 0.04965 | 0.00370 | 0.10778 | 0.00797 | 0.01574 | 0.00031 | 0.00469 | 0.00073 | 179 | 170 | 104 | 7  | 101 | 2   | 95  | 15 | 0.97 |
| NY17-06     | 275 | 268 | 1.03 | 0.04546 | 0.00391 | 0.09778 | 0.00836 | 0.01560 | 0.00028 | 0.00529 | 0.00085 | -31 | 187 | 95  | 8  | 100 | 2   | 107 | 17 | 1.05 |
| NY17-07     | 593 | 602 | 0.98 | 0.04741 | 0.00222 | 0.09791 | 0.00459 | 0.01498 | 0.00024 | 0.00458 | 0.00077 | 70  | 103 | 95  | 4  | 96  | 2   | 92  | 15 | 1.01 |
| NY17-08     | 502 | 529 | 0.95 | 0.05002 | 0.00445 | 0.10865 | 0.00948 | 0.01575 | 0.00038 | 0.00495 | 0.00139 | 196 | 203 | 105 | 9  | 101 | 2   | 100 | 28 | 0.96 |
| NY17-09     | 257 | 280 | 0.92 | 0.04787 | 0.00423 | 0.09818 | 0.00864 | 0.01488 | 0.00028 | 0.00395 | 0.00063 | 93  | 199 | 95  | 8  | 95  | 2   | 80  | 13 | 1.00 |
| NY17-10     | 360 | 366 | 0.98 | 0.04389 | 0.00317 | 0.09453 | 0.00681 | 0.01562 | 0.00027 | 0.00438 | 0.00078 | -76 | 156 | 92  | 6  | 100 | 2   | 88  | 16 | 1.09 |
| NY17-11     | 496 | 486 | 1.02 | 0.05307 | 0.00552 | 0.11467 | 0.01172 | 0.01569 | 0.00042 | 0.00368 | 0.00070 | 332 | 238 | 110 | 11 | 100 | 3   | 74  | 14 | 0.91 |
| NY17-12     | 360 | 377 | 0.95 | 0.04995 | 0.00335 | 0.10341 | 0.00689 | 0.01502 | 0.00027 | 0.00395 | 0.00056 | 193 | 153 | 100 | 6  | 96  | 2   | 80  | 11 | 0.96 |
| NY17-13     | 647 | 450 | 1.44 | 0.05011 | 0.00266 | 0.10211 | 0.00543 | 0.01478 | 0.00024 | 0.00391 | 0.00045 | 200 | 123 | 99  | 5  | 95  | 2   | 79  | 9  | 0.96 |
| NY17-14     | 889 | 705 | 1.26 | 0.05038 | 0.00208 | 0.10727 | 0.00446 | 0.01545 | 0.00025 | 0.00417 | 0.00053 | 213 | 98  | 103 | 4  | 99  | 2   | 84  | 11 | 0.96 |
| NY17-15     | 406 | 409 | 0.99 | 0.04817 | 0.00273 | 0.10274 | 0.00583 | 0.01547 | 0.00025 | 0.00428 | 0.00054 | 108 | 127 | 99  | 5  | 99  | 2   | 86  | 11 | 1.00 |
| NY17-16     | 292 | 287 | 1.02 | 0.04809 | 0.00492 | 0.09784 | 0.00993 | 0.01476 | 0.00032 | 0.00431 | 0.00072 | 104 | 225 | 95  | 9  | 94  | 2   | 87  | 14 | 0.99 |
| NY17-17     | 837 | 975 | 0.86 | 0.04705 | 0.00284 | 0.09650 | 0.00577 | 0.01488 | 0.00031 | 0.00295 | 0.00059 | 52  | 133 | 94  | 5  | 95  | 2   | 60  | 12 | 1.01 |
| NY17-18     | 514 | 497 | 1.03 | 0.05027 | 0.00281 | 0.10286 | 0.00572 | 0.01484 | 0.00026 | 0.00420 | 0.00074 | 207 | 129 | 99  | 5  | 95  | 2   | 85  | 15 | 0.96 |
| NY17-19     | 967 | 636 | 1.52 | 0.04664 | 0.00202 | 0.09586 | 0.00417 | 0.01491 | 0.00024 | 0.00439 | 0.00075 | 31  | 93  | 93  | 4  | 95  | 2   | 89  | 15 | 1.02 |
| NY17-20     | 424 | 413 | 1.03 | 0.04963 | 0.00296 | 0.10647 | 0.00633 | 0.01556 | 0.00027 | 0.00459 | 0.00085 | 178 | 136 | 103 | 6  | 100 | 2   | 93  | 17 | 0.97 |
| 09GF-84A 01 | 892 | 834 | 1.07 |         |         | 0.101   | 2.52    | 0.016   | 1.52    |         |         |     |     |     |    | 100 | 1.5 |     |    |      |
| 09GF-84A 02 | 764 | 941 | 0.81 |         |         | 0.104   | 2.25    | 0.016   | 1.54    |         |         |     |     |     |    | 99  | 1.5 |     |    |      |
| 09GF-84A 03 | 238 | 309 | 0.77 |         |         | 0.099   | 4.44    | 0.015   | 1.57    |         |         |     |     |     |    | 97  | 1.5 |     |    |      |
| 09GF-84A 04 | 547 | 759 | 0.72 |         |         | 0.102   | 2.53    | 0.016   | 1.52    |         |         |     |     |     |    | 100 | 1.5 |     |    |      |
| 09GF-84A 05 | 578 | 617 | 0.94 |         |         | 0.101   | 2.80    | 0.015   | 1.51    |         |         |     |     |     |    | 99  | 1.5 |     |    |      |
| 09GF-84A 06 | 157 | 197 | 0.80 |         |         | 0.101   | 3.87    | 0.016   | 1.59    |         |         |     |     |     |    | 100 | 1.6 |     |    |      |
| 09GF-84A 07 | 326 | 264 | 1.23 |         |         | 0.095   | 3.71    | 0.016   | 1.57    |         |         |     |     |     |    | 99  | 1.5 |     |    |      |
| 09GF-84A 08 | 536 | 593 | 0.90 |         |         | 0.100   | 2.86    | 0.015   | 1.56    |         |         |     |     |     |    | 99  | 1.5 |     |    |      |
| 09GF-84A 09 | 814 | 935 | 0.87 |         |         | 0.100   | 2.66    | 0.015   | 1.83    |         |         |     |     |     |    | 99  | 1.8 |     |    |      |
| 09GF-84A 10 | 451 | 439 | 1.03 |         |         | 0.103   | 3.72    | 0.016   | 1.54    |         |         |     |     |     |    | 100 | 1.5 |     |    |      |
| 09GF-84A 11 | 597 | 689 | 0.87 |         |         | 0.100   | 2.43    | 0.015   | 1.52    |         |         |     |     |     |    | 98  | 1.5 |     |    |      |
| 09GF-84A 12 | 524 | 484 | 1.08 |         |         | 0.101   | 2.89    | 0.016   | 1.78    |         |         |     |     |     |    | 99  | 1.8 |     |    |      |
| 09GF-84A 13 | 406 | 407 | 1.00 |         |         | 0.103   | 3.26    | 0.015   | 1.51    |         |         |     |     |     |    | 99  | 1.5 |     |    |      |
| 09GF-84A 14 | 487 | 393 | 1.24 |         |         | 0.100   | 4.27    | 0.016   | 1.55    |         |         |     |     |     |    | 100 | 1.5 |     |    |      |
| 09GF-84A 15 | 332 | 551 | 0.60 |         |         | 0.100   | 3.13    | 0.015   | 1.54    |         |         |     |     |     |    | 97  | 1.5 |     |    |      |
| 09GF-84A 16 | 316 | 316 | 1.00 |         |         | 0.101   | 4.74    | 0.015   | 1.56    |         |         |     |     |     |    | 98  | 1.5 |     |    |      |
| 09GF-96 01  | 68  | 142 | 0.48 |         |         | 0.1131  | 0.0087  | 0.0166  | 0.0005  |         |         |     |     |     |    | 106 | 3   |     |    |      |
| 09GF-96 02  | 179 | 269 | 0.66 |         |         | 0.1263  | 0.0045  | 0.0183  | 0.0003  |         |         |     |     |     |    | 117 | 2   |     |    |      |
| 09GF-96 03  | 314 | 347 | 0.91 |         |         | 0.1089  | 0.0041  | 0.0161  | 0.0003  |         |         |     |     |     |    | 103 | 2   |     |    |      |
| 09GF-96 04  | 248 | 244 | 1.01 |         |         | 0.1008  | 0.0049  | 0.0158  | 0.0003  |         |         |     |     |     |    | 101 | 2   |     |    |      |
| 09GF-96 05  | 137 | 166 | 0.83 |         |         | 0.1077  | 0.0071  | 0.0157  | 0.0004  |         |         |     |     |     |    | 100 | 3   |     |    |      |
| 09GF-96 06  | 221 | 329 | 0.67 |         |         | 0.1089  | 0.0054  | 0.0156  | 0.0003  |         |         |     |     |     |    | 100 | 2   |     |    |      |
| 09GF-96 07  | 187 | 264 | 0.71 |         |         | 0.1027  | 0.0046  | 0.0155  | 0.0003  |         |         |     |     |     |    | 99  | 2   |     |    |      |
| 09GF-96 08  | 256 | 335 | 0.76 |         |         | 0.1043  | 0.0044  | 0.0155  | 0.0003  |         |         |     |     |     |    | 99  | 2   |     |    |      |
| 09GF-96 09  | 380 | 386 | 0.98 |         |         | 0.1014  | 0.0068  | 0.0150  | 0.0002  |         |         |     |     |     |    | 96  | 2   |     |    |      |
| 09GF-96 10  | 519 | 393 | 1.32 |         |         | 0.1129  | 0.0036  | 0.0156  | 0.0002  |         |         |     |     |     |    | 100 | 1   |     |    |      |
| 09GF-96 11  | 327 | 369 | 0.89 |         |         | 0.1015  | 0.0036  | 0.0156  | 0.0003  |         |         |     |     |     |    | 100 | 2   |     |    |      |
| 09GF-96 12  | 326 | 446 | 0.73 |         |         | 0.1040  | 0.0034  | 0.0156  | 0.0002  |         |         |     |     |     |    | 100 | 2   |     |    |      |
| 09GF-96 13  | 464 | 544 | 0.85 |         |         | 0.1005  | 0.0032  | 0.0156  | 0.0002  |         |         |     |     |     |    | 100 | 1   |     |    |      |
| 09GF-96 14  | 298 | 425 | 0.70 |         |         | 0.1006  | 0.0037  | 0.0162  | 0.0003  |         |         |     |     |     |    | 103 | 2   |     |    |      |
| 09GF-96 15  | 406 | 422 | 0.96 |         |         | 0.1279  | 0.0043  | 0.0176  | 0.0003  |         |         |     |     |     |    | 112 | 2   |     |    |      |
| 09GF-96 16  | 269 | 376 | 0.72 |         |         | 0.1095  | 0.0037  | 0.0158  | 0.0003  |         |         |     |     |     |    | 101 | 2   |     |    |      |
| 09GF-96 17  | 323 | 432 | 0.75 |         |         | 0.1039  | 0.0037  | 0.0159  | 0.0003  |         |         |     |     |     |    | 102 | 2   |     |    |      |
| 09GF-96 18  | 390 | 315 | 1.24 |         |         | 0.1374  | 0.0071  | 0.0171  | 0.0004  |         |         |     |     |     |    | 109 | 2   |     |    |      |
| 09GF-96 19  | 262 | 380 | 0.69 |         |         | 0.1073  |         |         |         |         |         |     |     |     |    |     |     |     |    |      |

|              |     |      |      |        |        |        |        |     |     |
|--------------|-----|------|------|--------|--------|--------|--------|-----|-----|
| 09GF-103 05  | 269 | 376  | 0.72 | 0.1065 | 0.0036 | 0.0156 | 0.0003 | 100 | 2   |
| 09GF-103 06  | 352 | 493  | 0.71 | 0.1051 | 0.0028 | 0.0161 | 0.0003 | 103 | 2   |
| 09GF-103 07  | 165 | 212  | 0.78 | 0.1046 | 0.0040 | 0.0154 | 0.0003 | 99  | 2   |
| 09GF-103 08  | 229 | 283  | 0.81 | 0.1222 | 0.0038 | 0.0149 | 0.0003 | 95  | 2   |
| 09GF-103 09  | 143 | 210  | 0.68 | 0.0975 | 0.0052 | 0.0154 | 0.0004 | 98  | 2   |
| 09GF-103 10  | 229 | 309  | 0.74 | 0.0962 | 0.0032 | 0.0158 | 0.0003 | 101 | 2   |
| 09GF-103 11  | 253 | 342  | 0.74 | 0.1004 | 0.0031 | 0.0158 | 0.0003 | 101 | 2   |
| 09GF-103 12  | 539 | 618  | 0.87 | 0.1053 | 0.0030 | 0.0156 | 0.0003 | 100 | 2   |
| 09GF-103 13  | 250 | 360  | 0.69 | 0.1026 | 0.0034 | 0.0156 | 0.0003 | 100 | 2   |
| 09GF-103 14  | 364 | 509  | 0.71 | 0.1003 | 0.0026 | 0.0156 | 0.0003 | 99  | 2   |
| 09GF-103 15  | 443 | 546  | 0.81 | 0.1015 | 0.0039 | 0.0149 | 0.0003 | 95  | 2   |
| 09GF-103 16  | 253 | 395  | 0.64 | 0.0999 | 0.0031 | 0.0152 | 0.0003 | 97  | 2   |
| 09GF-103 17  | 256 | 390  | 0.66 | 0.1021 | 0.0034 | 0.0151 | 0.0003 | 97  | 2   |
| 09GF-103 18  | 227 | 339  | 0.67 | 0.1046 | 0.0037 | 0.0155 | 0.0003 | 99  | 2   |
| 09GF-103 19  | 497 | 753  | 0.66 | 0.1032 | 0.0021 | 0.0157 | 0.0002 | 101 | 1   |
| 09GF-103 20  | 246 | 269  | 0.91 | 0.1035 | 0.0042 | 0.0157 | 0.0003 | 101 | 2   |
| 09GF-103 21  | 375 | 512  | 0.73 | 0.1005 | 0.0035 | 0.0151 | 0.0003 | 97  | 2   |
| 09GF-103 22  | 144 | 235  | 0.62 | 0.1266 | 0.0046 | 0.0152 | 0.0003 | 97  | 2   |
| 09GF-103 23  | 285 | 403  | 0.71 | 0.1007 | 0.0030 | 0.0153 | 0.0003 | 98  | 2   |
| 09GF-103 24  | 251 | 457  | 0.55 | 0.1024 | 0.0047 | 0.0156 | 0.0004 | 100 | 2   |
|              |     |      |      |        |        |        |        |     |     |
| 09GF-104A 01 | 352 | 338  | 1.04 | 0.106  | 3.05   | 0.015  | 1.56   | 98  | 1.5 |
| 09GF-104A 02 | 349 | 398  | 0.88 | 0.099  | 3.30   | 0.015  | 1.57   | 97  | 1.5 |
| 09GF-104A 03 | 523 | 499  | 1.05 | 0.098  | 3.27   | 0.015  | 1.54   | 95  | 1.5 |
| 09GF-104A 04 | 496 | 478  | 1.04 | 0.100  | 3.47   | 0.015  | 1.56   | 97  | 1.5 |
| 09GF-104A 05 | 152 | 258  | 0.59 | 0.101  | 3.91   | 0.015  | 1.76   | 98  | 1.7 |
| 09GF-104A 06 | 473 | 528  | 0.90 | 0.097  | 2.66   | 0.015  | 1.57   | 98  | 1.5 |
| 09GF-104A 07 | 593 | 641  | 0.92 | 0.104  | 3.86   | 0.015  | 1.56   | 98  | 1.5 |
| 09GF-104A 08 | 416 | 433  | 0.96 | 0.100  | 2.81   | 0.015  | 1.52   | 99  | 1.5 |
| 09GF-104A 09 | 121 | 151  | 0.80 | 0.104  | 4.29   | 0.015  | 1.82   | 98  | 1.8 |
| 09GF-104A 10 | 669 | 631  | 1.06 | 0.100  | 3.11   | 0.015  | 1.54   | 98  | 1.5 |
| 09GF-104A 11 | 451 | 493  | 0.92 | 0.102  | 3.08   | 0.016  | 1.52   | 100 | 1.5 |
| 09GF-104A 12 | 463 | 404  | 1.14 | 0.099  | 3.25   | 0.015  | 1.54   | 98  | 1.5 |
| 09GF-104A 13 | 173 | 259  | 0.67 | 0.102  | 3.44   | 0.016  | 1.57   | 100 | 1.6 |
| 09GF-104A 14 | 631 | 462  | 1.37 | 0.100  | 3.20   | 0.015  | 1.58   | 96  | 1.5 |
| 09GF-104A 15 | 352 | 374  | 0.94 | 0.098  | 4.40   | 0.015  | 1.56   | 98  | 1.5 |
| 09GF-104A 16 | 470 | 411  | 1.14 | 0.100  | 2.92   | 0.015  | 1.55   | 97  | 1.5 |
|              |     |      |      |        |        |        |        |     |     |
| 09GF-108 01  | 202 | 194  | 1.04 | 0.101  | 7.83   | 0.015  | 1.64   | 98  | 2   |
| 09GF-108 02  | 419 | 538  | 0.78 | 0.104  | 3.30   | 0.016  | 1.53   | 100 | 2   |
| 09GF-108 03  | 209 | 328  | 0.64 | 0.101  | 4.13   | 0.015  | 1.56   | 98  | 2   |
| 09GF-108 04  | 399 | 363  | 1.10 | 0.104  | 3.67   | 0.016  | 1.52   | 101 | 2   |
| 09GF-108 05  | 219 | 291  | 0.75 | 0.100  | 4.21   | 0.015  | 1.57   | 99  | 2   |
| 09GF-108 06  | 253 | 230  | 1.10 | 0.105  | 5.53   | 0.015  | 1.79   | 99  | 2   |
| 09GF-108 07  | 211 | 289  | 0.73 | 0.099  | 4.44   | 0.015  | 1.57   | 99  | 2   |
| 09GF-108 08  | 305 | 278  | 1.10 | 0.101  | 4.18   | 0.016  | 1.57   | 99  | 2   |
| 09GF-108 09  | 370 | 470  | 0.79 | 0.103  | 3.11   | 0.016  | 1.54   | 99  | 2   |
| 09GF-108 10  | 228 | 240  | 0.95 | 0.104  | 5.45   | 0.016  | 1.67   | 99  | 2   |
| 09GF-108 11  | 661 | 396  | 1.67 | 0.101  | 3.71   | 0.016  | 1.54   | 100 | 2   |
| 09GF-108 12  | 322 | 288  | 1.12 | 0.101  | 4.44   | 0.015  | 1.57   | 99  | 2   |
| 09GF-108 13  | 150 | 181  | 0.83 | 0.106  | 7.37   | 0.015  | 1.81   | 99  | 2   |
| 09GF-108 14  | 170 | 170  | 1.00 | 0.106  | 7.04   | 0.016  | 1.62   | 100 | 2   |
|              |     |      |      |        |        |        |        |     |     |
| 09GF113A-02  | 111 | 114  | 0.97 | 0.0954 | 0.0244 | 0.0150 | 0.0019 | 96  | 12  |
| 09GF113A-03  | 167 | 148  | 1.13 | 0.1182 | 0.0294 | 0.0165 | 0.0017 | 106 | 11  |
| 09GF113A-04  | 287 | 243  | 1.18 | 0.1581 | 0.0360 | 0.0148 | 0.0008 | 95  | 5   |
| 09GF113A-05  | 108 | 105  | 1.04 | 0.1226 | 0.0346 | 0.0156 | 0.0009 | 100 | 6   |
| 09GF113A-06  | 324 | 189  | 1.71 | 0.2930 | 0.0754 | 0.0166 | 0.0012 | 106 | 8   |
| 09GF113A-08  | 161 | 173  | 0.93 | 0.1170 | 0.0908 | 0.0140 | 0.0017 | 90  | 11  |
| 09GF113A-09  | 120 | 101  | 1.19 | 0.0936 | 0.0291 | 0.0147 | 0.0010 | 94  | 6   |
| 09GF113A-10  | 572 | 297  | 1.93 | 0.1014 | 0.0359 | 0.0149 | 0.0010 | 95  | 6   |
| 09GF113A-12  | 222 | 236  | 0.94 | 0.1309 | 0.0370 | 0.0131 | 0.0008 | 84  | 5   |
| 09GF113A-13  | 486 | 346  | 1.40 | 0.1136 | 0.0459 | 0.0141 | 0.0012 | 90  | 7   |
| 09GF113A-14  | 116 | 114  | 1.02 | 0.0921 | 0.0446 | 0.0129 | 0.0011 | 83  | 7   |
| 09GF113A-15  | 437 | 369  | 1.18 | 0.1406 | 0.0212 | 0.0154 | 0.0005 | 99  | 3   |
| 09GF113A-16  | 335 | 277  | 1.21 | 0.1660 | 0.0334 | 0.0155 | 0.0006 | 99  | 4   |
| 09GF113A-17  | 252 | 336  | 0.75 | 0.1247 | 0.0237 | 0.0149 | 0.0007 | 96  | 4   |
| 09GF113A-18  | 206 | 171  | 1.21 | 0.0916 | 0.0191 | 0.0144 | 0.0010 | 92  | 6   |
| 09GF113A-19  | 70  | 66   | 1.05 | 0.1353 | 0.0215 | 0.0163 | 0.0008 | 104 | 5   |
| 09GF113A-21  | 142 | 96   | 1.49 | 0.0911 | 0.0337 | 0.0144 | 0.0013 | 92  | 8   |
| 09GF113A-22  | 262 | 286  | 0.92 | 0.1348 | 0.0278 | 0.0142 | 0.0006 | 91  | 4   |
| 09GF113A-24  | 81  | 81   | 1.00 | 0.1405 | 0.0231 | 0.0158 | 0.0011 | 101 | 7   |
| 09GF113A-25  | 203 | 143  | 1.42 | 0.1009 | 0.0104 | 0.0159 | 0.0005 | 102 | 3   |
| 09GF113A-26  | 105 | 97   | 1.09 | 0.0968 | 0.0365 | 0.0152 | 0.0013 | 98  | 8   |
| 09GF113A-27  | 112 | 114  | 0.99 | 0.0965 | 0.0193 | 0.0152 | 0.0007 | 97  | 4   |
| 09GF113A-28  | 550 | 1050 | 0.52 | 0.1140 | 0.0052 | 0.0156 | 0.0002 | 100 | 2   |
| 09GF113A-29  | 105 | 94   | 1.12 | 0.4652 | 0.3673 | 0.0221 | 0.0033 | 141 | 21  |
| 09GF113A-30  | 320 | 192  | 1.67 | 0.1463 | 0.0462 | 0.0159 | 0.0011 | 101 | 7   |
| 09GF113A-31  | 61  | 58   | 1.05 | 0.1097 | 0.0294 | 0.0158 | 0.0013 | 101 | 8   |
| 09GF113A-32  | 287 | 220  | 1.31 | 0.1460 | 0.0519 | 0.0128 | 0.0010 | 82  | 6   |
| 09GF113A-33  | 69  | 61   | 1.12 | 0.0937 | 0.0263 | 0.0148 | 0.0009 | 94  | 6   |
| 09GF113A-34  | 177 | 164  | 1.08 | 0.1192 | 0.0363 | 0.0135 | 0.0008 | 87  | 5   |
| 09GF113A-35  | 111 | 107  | 1.04 | 1.5000 | 0.6437 | 0.0241 | 0.0059 | 153 | 37  |
| 09GF113A-37  | 87  | 77   | 1.13 | 0.0983 | 0.0490 | 0.0155 | 0.0012 | 99  | 8   |
| 09GF113A-38  | 492 | 324  | 1.52 | 0.2467 | 0.0735 | 0.0158 | 0.0013 | 101 | 8   |

|             |      |      |      |        |        |        |        |     |   |
|-------------|------|------|------|--------|--------|--------|--------|-----|---|
| 09GF113A 39 | 876  | 727  | 1.21 | 0.0933 | 0.0258 | 0.0142 | 0.0007 | 91  | 4 |
| 09GF113A 40 | 115  | 109  | 1.06 | 0.1063 | 0.0333 | 0.0148 | 0.0009 | 95  | 6 |
| 09GF115A 03 | 1573 | 3714 | 0.42 | 0.0018 | 0.0199 | 0.0002 | 0.0063 | 127 | 2 |
| 09GF115A 04 | 966  | 867  | 1.11 | 0.0032 | 0.0179 | 0.0003 | 0.0052 | 115 | 2 |
| 09GF115A 05 | 306  | 368  | 0.83 | 0.0079 | 0.0213 | 0.0005 | 0.0068 | 136 | 3 |
| 09GF115A 07 | 229  | 205  | 1.12 | 0.0142 | 0.0201 | 0.0008 | 0.0065 | 128 | 5 |
| 09GF115A 08 | 1252 | 2824 | 0.44 | 0.0057 | 0.0195 | 0.0003 | 0.0062 | 125 | 2 |
| 09GF115A 09 | 127  | 176  | 0.72 | 0.0192 | 0.0213 | 0.0009 | 0.0067 | 136 | 6 |
| 09GF115A 10 | 183  | 199  | 0.92 | 0.0105 | 0.0215 | 0.0006 | 0.0065 | 137 | 4 |
| 09GF115A 11 | 325  | 321  | 1.01 | 0.0086 | 0.0206 | 0.0005 | 0.0066 | 131 | 3 |
| 09GF115A 12 | 145  | 209  | 0.69 | 0.0178 | 0.0160 | 0.0010 | 0.0054 | 102 | 6 |
| 09GF115A 13 | 826  | 1745 | 0.47 | 0.0026 | 0.0196 | 0.0003 | 0.0064 | 125 | 2 |
| 09GF115A 14 | 137  | 207  | 0.66 | 0.0185 | 0.0154 | 0.0006 | 0.0048 | 98  | 4 |
| 09GF115A 15 | 148  | 203  | 0.73 | 0.0491 | 0.0145 | 0.0011 | 0.0042 | 93  | 7 |
| 09GF115A 16 | 107  | 405  | 0.26 | 0.0136 | 0.0209 | 0.0006 | 0.0066 | 133 | 4 |
| 09GF115A 17 | 845  | 1188 | 0.71 | 0.0052 | 0.0197 | 0.0004 | 0.0058 | 126 | 3 |
| 09GF115A 18 | 619  | 647  | 0.96 | 0.0056 | 0.0149 | 0.0003 | 0.0048 | 95  | 2 |
| 09GF115A 19 | 262  | 290  | 0.90 | 0.0391 | 0.0163 | 0.0011 | 0.0051 | 104 | 7 |
| 09GF115A 21 | 659  | 1544 | 0.43 | 0.0049 | 0.0178 | 0.0003 | 0.0056 | 114 | 2 |
| 09GF115A 22 | 419  | 472  | 0.89 | 0.0174 | 0.0187 | 0.0005 | 0.0057 | 119 | 3 |
| 09GF115A 23 | 358  | 166  | 2.16 | 0.0284 | 0.0194 | 0.0006 | 0.0060 | 124 | 4 |
| 09GF115A 24 | 298  | 563  | 0.53 | 0.0061 | 0.0213 | 0.0003 | 0.0068 | 136 | 2 |
| 09GF115A 25 | 2506 | 2058 | 1.22 | 0.0028 | 0.0188 | 0.0003 | 0.0053 | 120 | 2 |
| 09GF115A 26 | 674  | 1516 | 0.44 | 0.0028 | 0.0209 | 0.0003 | 0.0067 | 133 | 2 |
| 09GF118A 01 | 132  | 201  | 0.66 | 0.0923 | 0.0410 | 0.0145 | 0.0013 | 93  | 8 |
| 09GF118A 02 | 299  | 308  | 0.97 | 0.0966 | 0.0058 | 0.0152 | 0.0004 | 97  | 2 |
| 09GF118A 03 | 355  | 369  | 0.96 | 0.1132 | 0.0101 | 0.0151 | 0.0006 | 96  | 4 |
| 09GF118A 04 | 458  | 392  | 1.17 | 0.1059 | 0.0070 | 0.0154 | 0.0004 | 99  | 3 |
| 09GF118A 05 | 381  | 521  | 0.73 | 0.1158 | 0.0135 | 0.0148 | 0.0008 | 95  | 5 |
| 09GF118A 06 | 323  | 432  | 0.75 | 0.1043 | 0.0121 | 0.0147 | 0.0004 | 94  | 3 |
| 09GF118A 07 | 309  | 378  | 0.82 | 0.0985 | 0.0087 | 0.0149 | 0.0006 | 95  | 3 |
| 09GF118A 08 | 231  | 315  | 0.73 | 0.1146 | 0.0152 | 0.0156 | 0.0005 | 100 | 3 |
| 09GF118A 09 | 239  | 366  | 0.65 | 0.0985 | 0.0068 | 0.0150 | 0.0004 | 96  | 3 |
| 09GF118A 10 | 267  | 387  | 0.69 | 0.1090 | 0.0133 | 0.0151 | 0.0008 | 97  | 5 |
| 09GF118A 11 | 285  | 360  | 0.79 | 0.1134 | 0.0056 | 0.0164 | 0.0004 | 105 | 2 |
| 09GF118A 12 | 225  | 375  | 0.60 | 0.1134 | 0.0082 | 0.0170 | 0.0005 | 109 | 3 |
| 09GF118A 13 | 184  | 262  | 0.70 | 0.1057 | 0.0107 | 0.0153 | 0.0006 | 98  | 4 |
| 09GF118A 14 | 306  | 339  | 0.90 | 0.1013 | 0.0053 | 0.0153 | 0.0003 | 98  | 2 |
| 09GF118A 15 | 376  | 512  | 0.73 | 0.1007 | 0.0044 | 0.0150 | 0.0003 | 96  | 2 |
| 09GF118A 16 | 674  | 767  | 0.88 | 0.0994 | 0.0031 | 0.0149 | 0.0002 | 95  | 2 |
| 09GF118A 17 | 271  | 409  | 0.66 | 0.1187 | 0.0052 | 0.0149 | 0.0003 | 95  | 2 |
| 09GF118A 18 | 251  | 371  | 0.68 | 0.1031 | 0.0059 | 0.0155 | 0.0004 | 99  | 2 |
| 09GF118A 19 | 225  | 315  | 0.71 | 0.1043 | 0.0061 | 0.0155 | 0.0004 | 99  | 2 |
| 09GF118A 20 | 243  | 399  | 0.61 | 0.0967 | 0.0086 | 0.0147 | 0.0004 | 94  | 2 |
| 09GF118A 21 | 228  | 282  | 0.81 | 0.0935 | 0.0094 | 0.0141 | 0.0006 | 90  | 4 |
| 09GF118A 22 | 339  | 465  | 0.73 | 0.0949 | 0.0049 | 0.0151 | 0.0003 | 96  | 2 |
| 09GF118A 23 | 399  | 549  | 0.73 | 0.0959 | 0.0036 | 0.0152 | 0.0003 | 97  | 2 |
| 09GF118A 24 | 382  | 442  | 0.86 | 0.0990 | 0.0041 | 0.0150 | 0.0003 | 96  | 2 |
| 09GF-126 01 | 160  | 273  | 0.58 | 0.148  | 6.37   | 0.022  | 1.56   | 139 | 2 |
| 09GF-126 02 | 427  | 435  | 0.98 | 0.151  | 4.22   | 0.022  | 1.74   | 143 | 2 |
| 09GF-126 03 | 99   | 184  | 0.54 | 0.151  | 5.15   | 0.022  | 1.55   | 141 | 2 |
| 09GF-126 04 | 185  | 312  | 0.59 | 0.144  | 4.89   | 0.022  | 1.54   | 140 | 2 |
| 09GF-126 05 | 230  | 378  | 0.61 | 0.143  | 3.86   | 0.022  | 1.54   | 141 | 2 |
| 09GF-126 06 | 298  | 245  | 1.22 | 0.152  | 3.90   | 0.023  | 1.91   | 145 | 3 |
| 09GF-126 07 | 422  | 379  | 1.11 | 0.150  | 2.93   | 0.022  | 1.53   | 140 | 2 |
| 09GF-126 08 | 159  | 263  | 0.61 | 0.149  | 4.45   | 0.022  | 1.50   | 140 | 2 |
| 09GF-126 09 | 501  | 455  | 1.10 | 0.145  | 3.42   | 0.021  | 1.61   | 136 | 2 |
| 09GF-126 10 | 433  | 417  | 1.04 | 0.153  | 2.84   | 0.023  | 1.59   | 144 | 2 |
| 09GF-126 11 | 98   | 152  | 0.64 | 0.139  | 7.12   | 0.022  | 1.61   | 138 | 2 |
| 09GF-126 12 | 131  | 133  | 0.99 | 0.153  | 6.21   | 0.022  | 1.76   | 141 | 2 |
| 09GF-126 13 | 282  | 297  | 0.95 | 0.142  | 4.58   | 0.022  | 1.64   | 141 | 2 |
| 09GF-126 14 | 248  | 366  | 0.68 | 0.149  | 3.41   | 0.022  | 1.55   | 141 | 2 |
| 09GF-126 15 | 404  | 385  | 1.05 | 0.144  | 5.55   | 0.022  | 1.94   | 141 | 3 |

N14, Yongtai (Guo et al., 2012)

|            |     |     |      |        |        |        |        |    |    |
|------------|-----|-----|------|--------|--------|--------|--------|----|----|
| 09GF55A 01 | 20  | 11  | 1.80 | 0.0886 | 0.0790 | 0.0152 | 0.0019 | 97 | 12 |
| 09GF55A 02 | 75  | 92  | 0.82 | 0.0960 | 0.0134 | 0.0142 | 0.0007 | 91 | 4  |
| 09GF55A 03 | 30  | 17  | 1.71 | 0.2476 | 0.0567 | 0.0161 | 0.0016 | 95 | 11 |
| 09GF55A 05 | 166 | 80  | 2.08 | 0.2318 | 0.0162 | 0.0157 | 0.0006 | 94 | 4  |
| 09GF55A 07 | 476 | 235 | 2.03 | 0.1127 | 0.0067 | 0.0149 | 0.0004 | 95 | 3  |
| 09GF55A 08 | 103 | 157 | 0.66 | 0.1089 | 0.0114 | 0.0142 | 0.0006 | 91 | 4  |
| 09GF55A 09 | 185 | 71  | 2.61 | 0.6864 | 0.0278 | 0.0188 | 0.0007 | 88 | 5  |
| 09GF55A 10 | 91  | 163 | 0.56 | 0.0960 | 0.0077 | 0.0146 | 0.0004 | 94 | 3  |
| 09GF55A 11 | 39  | 17  | 2.27 | 0.0916 | 0.0507 | 0.0137 | 0.0015 | 88 | 10 |
| 09GF55A 12 | 149 | 181 | 0.82 | 0.1288 | 0.0095 | 0.0145 | 0.0005 | 91 | 3  |
| 09GF55A 14 | 183 | 211 | 0.87 | 0.1023 | 0.0063 | 0.0136 | 0.0004 | 87 | 2  |
| 09GF55A 15 | 88  | 88  | 1.00 | 0.1386 | 0.0212 | 0.0148 | 0.0010 | 92 | 6  |
| 09GF55A 16 | 64  | 118 | 0.54 | 0.1668 | 0.0092 | 0.0151 | 0.0005 | 93 | 3  |
| 09GF55A 17 | 192 | 137 | 1.40 | 0.0909 | 0.0097 | 0.0138 | 0.0006 | 88 | 3  |
| 09GF55A 19 | 505 | 308 | 1.64 | 0.1158 | 0.0051 | 0.0145 | 0.0003 | 93 | 2  |
| 09GF55A 20 | 64  | 47  | 1.37 | 0.1081 | 0.0228 | 0.0147 | 0.0008 | 94 | 5  |
| 09GF55A 21 | 238 | 290 | 0.82 | 0.4491 | 0.0111 | 0.0173 | 0.0004 | 92 | 3  |

|            |     |     |      |  |        |        |        |        |  |  |  |  |  |  |  |  |  |     |   |
|------------|-----|-----|------|--|--------|--------|--------|--------|--|--|--|--|--|--|--|--|--|-----|---|
| 09GF55A 22 | 112 | 182 | 0.62 |  | 0.1209 | 0.0126 | 0.0147 | 0.0007 |  |  |  |  |  |  |  |  |  | 94  | 5 |
| 09GF55A 23 | 342 | 218 | 1.57 |  | 0.1185 | 0.0092 | 0.0141 | 0.0005 |  |  |  |  |  |  |  |  |  | 89  | 3 |
| 09GF55A 24 | 132 | 207 | 0.64 |  | 0.1106 | 0.0086 | 0.0143 | 0.0005 |  |  |  |  |  |  |  |  |  | 92  | 3 |
| 09GF-70 01 | 492 | 231 | 2.13 |  | 0.1150 | 0.0053 | 0.0159 | 0.0004 |  |  |  |  |  |  |  |  |  | 101 | 2 |
| 09GF-70 02 | 772 | 593 | 1.30 |  | 0.1134 | 0.0082 | 0.0156 | 0.0003 |  |  |  |  |  |  |  |  |  | 99  | 2 |
| 09GF-70 03 | 329 | 357 | 0.92 |  | 0.1093 | 0.0079 | 0.0147 | 0.0003 |  |  |  |  |  |  |  |  |  | 94  | 2 |
| 09GF-70 04 | 311 | 279 | 1.11 |  | 0.1122 | 0.0123 | 0.0140 | 0.0004 |  |  |  |  |  |  |  |  |  | 89  | 2 |
| 09GF-70 05 | 304 | 364 | 0.83 |  | 0.0997 | 0.0060 | 0.0152 | 0.0003 |  |  |  |  |  |  |  |  |  | 97  | 2 |
| 09GF-70 06 | 123 | 86  | 1.43 |  | 0.1001 | 0.0160 | 0.0151 | 0.0005 |  |  |  |  |  |  |  |  |  | 96  | 3 |
| 09GF-70 07 | 502 | 280 | 1.79 |  | 0.1060 | 0.0065 | 0.0157 | 0.0005 |  |  |  |  |  |  |  |  |  | 100 | 3 |
| 09GF-70 08 | 301 | 302 | 1.00 |  | 0.1072 | 0.0038 | 0.0152 | 0.0003 |  |  |  |  |  |  |  |  |  | 97  | 2 |
| 09GF-70 09 | 168 | 142 | 1.19 |  | 0.1061 | 0.0064 | 0.0148 | 0.0004 |  |  |  |  |  |  |  |  |  | 95  | 3 |
| 09GF-70 10 | 247 | 208 | 1.19 |  | 0.0944 | 0.0042 | 0.0153 | 0.0003 |  |  |  |  |  |  |  |  |  | 98  | 2 |
| 09GF-70 11 | 175 | 194 | 0.91 |  | 0.0985 | 0.0044 | 0.0149 | 0.0003 |  |  |  |  |  |  |  |  |  | 95  | 2 |
| 09GF-70 12 | 369 | 263 | 1.40 |  | 0.1013 | 0.0046 | 0.0144 | 0.0003 |  |  |  |  |  |  |  |  |  | 92  | 2 |
| 09GF-70 13 | 195 | 201 | 0.97 |  | 0.1051 | 0.0055 | 0.0155 | 0.0004 |  |  |  |  |  |  |  |  |  | 99  | 2 |
| 09GF-70 14 | 532 | 272 | 1.95 |  | 0.1090 | 0.0060 | 0.0156 | 0.0004 |  |  |  |  |  |  |  |  |  | 100 | 2 |
| 09GF-70 15 | 933 | 694 | 1.35 |  | 0.1123 | 0.0095 | 0.0147 | 0.0003 |  |  |  |  |  |  |  |  |  | 94  | 2 |
| 09GF-70 16 | 257 | 153 | 1.69 |  | 0.1018 | 0.0058 | 0.0150 | 0.0004 |  |  |  |  |  |  |  |  |  | 96  | 2 |
| 09GF-70 17 | 317 | 364 | 0.87 |  | 0.1006 | 0.0030 | 0.0151 | 0.0003 |  |  |  |  |  |  |  |  |  | 96  | 2 |
| 09GF-70 18 | 536 | 343 | 1.56 |  | 0.1044 | 0.0037 | 0.0151 | 0.0003 |  |  |  |  |  |  |  |  |  | 97  | 2 |
| 09GF-70 19 | 269 | 234 | 1.15 |  | 0.0951 | 0.0050 | 0.0155 | 0.0004 |  |  |  |  |  |  |  |  |  | 99  | 2 |
| 09GF-70 20 | 268 | 286 | 0.94 |  | 0.1288 | 0.0114 | 0.0154 | 0.0004 |  |  |  |  |  |  |  |  |  | 98  | 2 |
| 09GF-70 21 | 831 | 547 | 1.52 |  | 0.0974 | 0.0041 | 0.0154 | 0.0003 |  |  |  |  |  |  |  |  |  | 99  | 2 |
| 09GF-70 22 | 264 | 133 | 1.98 |  | 0.1307 | 0.0072 | 0.0150 | 0.0004 |  |  |  |  |  |  |  |  |  | 96  | 3 |
| 09GF-70 23 | 218 | 184 | 1.19 |  | 0.1013 | 0.0055 | 0.0151 | 0.0004 |  |  |  |  |  |  |  |  |  | 96  | 2 |
| 09GF-70 24 | 145 | 164 | 0.88 |  | 0.1022 | 0.0078 | 0.0151 | 0.0005 |  |  |  |  |  |  |  |  |  | 96  | 3 |

#### N15, Fuqing (Liu et al., 2016)

|          |      |     |      |         |         |         |         |         |         |         |         |     |     |     |    |     |   |     |    |      |
|----------|------|-----|------|---------|---------|---------|---------|---------|---------|---------|---------|-----|-----|-----|----|-----|---|-----|----|------|
| NY18-01  | 218  | 217 | 1    | 0.04563 | 0.00466 | 0.10917 | 0.01112 | 0.01735 | 0.00032 | 0.00567 | 0.00073 | -22 | 205 | 105 | 10 | 111 | 2 | 114 | 15 | 1.06 |
| NY18-02  | 245  | 258 | 0.95 | 0.04766 | 0.00655 | 0.11568 | 0.01576 | 0.01760 | 0.00049 | 0.00372 | 0.00067 | 82  | 275 | 111 | 14 | 112 | 3 | 75  | 13 | 1.01 |
| NY18-03  | 250  | 262 | 0.95 | 0.04660 | 0.00422 | 0.11149 | 0.01006 | 0.01735 | 0.00032 | 0.00565 | 0.00086 | 29  | 200 | 107 | 9  | 111 | 2 | 114 | 17 | 1.04 |
| NY18-04  | 356  | 373 | 0.95 | 0.04892 | 0.00555 | 0.11684 | 0.01309 | 0.01733 | 0.00047 | 0.00432 | 0.00097 | 144 | 248 | 112 | 12 | 111 | 3 | 87  | 20 | 0.99 |
| NY18-05  | 691  | 680 | 1.02 | 0.04930 | 0.00197 | 0.11747 | 0.00477 | 0.01728 | 0.00028 | 0.00540 | 0.00085 | 162 | 94  | 113 | 4  | 110 | 2 | 109 | 17 | 0.97 |
| NY18-06  | 226  | 211 | 1.07 | 0.04889 | 0.00984 | 0.11858 | 0.02360 | 0.01759 | 0.00063 | 0.00692 | 0.00234 | 143 | 362 | 114 | 21 | 112 | 4 | 139 | 47 | 0.98 |
| NY18-07  | 246  | 335 | 0.74 | 0.04927 | 0.00491 | 0.11638 | 0.01148 | 0.01714 | 0.00040 | 0.00549 | 0.00126 | 161 | 223 | 112 | 10 | 110 | 3 | 111 | 25 | 0.98 |
| NY18-08  | 175  | 177 | 0.99 | 0.04822 | 0.00740 | 0.11715 | 0.01788 | 0.01762 | 0.00045 | 0.00524 | 0.00123 | 110 | 289 | 112 | 16 | 113 | 3 | 106 | 25 | 1.01 |
| NY18-09  | 242  | 200 | 1.21 | 0.04934 | 0.00985 | 0.11849 | 0.02334 | 0.01742 | 0.00064 | 0.00466 | 0.00196 | 164 | 363 | 114 | 21 | 111 | 4 | 94  | 39 | 0.97 |
| NY18-10  | 509  | 348 | 1.46 | 0.05064 | 0.00359 | 0.12082 | 0.00855 | 0.01730 | 0.00032 | 0.00642 | 0.00168 | 224 | 162 | 116 | 8  | 111 | 2 | 129 | 34 | 0.96 |
| NY18-11  | 245  | 236 | 1.04 | 0.04881 | 0.00492 | 0.11734 | 0.01175 | 0.01745 | 0.00035 | 0.00572 | 0.00096 | 139 | 225 | 113 | 11 | 112 | 2 | 115 | 19 | 0.99 |
| NY18-12  | 214  | 197 | 1.08 | 0.04850 | 0.00703 | 0.11660 | 0.01676 | 0.01746 | 0.00044 | 0.00541 | 0.00099 | 124 | 291 | 112 | 15 | 112 | 3 | 109 | 20 | 1.00 |
| NY18-13  | 239  | 260 | 0.92 | 0.04813 | 0.00511 | 0.11614 | 0.01226 | 0.01751 | 0.00038 | 0.00561 | 0.00101 | 106 | 234 | 112 | 11 | 112 | 2 | 113 | 20 | 1.00 |
| NY18-14  | 234  | 219 | 1.07 | 0.04834 | 0.00696 | 0.11653 | 0.01664 | 0.01749 | 0.00045 | 0.00511 | 0.00117 | 116 | 289 | 112 | 15 | 112 | 3 | 103 | 24 | 1.00 |
| NY18-15  | 202  | 232 | 0.87 | 0.04859 | 0.00523 | 0.11485 | 0.01226 | 0.01715 | 0.00036 | 0.00578 | 0.00117 | 128 | 238 | 110 | 11 | 110 | 2 | 116 | 24 | 1.00 |
| NY18-16  | 249  | 294 | 0.85 | 0.04842 | 0.00370 | 0.11640 | 0.00885 | 0.01744 | 0.00031 | 0.00616 | 0.00117 | 120 | 172 | 112 | 8  | 111 | 2 | 124 | 24 | 0.99 |
| NY18-17  | 210  | 160 | 1.31 | 0.04805 | 0.00735 | 0.11452 | 0.01739 | 0.01730 | 0.00042 | 0.00540 | 0.00123 | 102 | 288 | 110 | 16 | 111 | 3 | 109 | 25 | 1.01 |
| NY18-18  | 452  | 367 | 1.23 | 0.04839 | 0.00521 | 0.11727 | 0.01239 | 0.01760 | 0.00045 | 0.00609 | 0.00185 | 118 | 238 | 113 | 11 | 112 | 3 | 123 | 37 | 0.99 |
| NY18-19  | 182  | 185 | 0.98 | 0.04505 | 0.01063 | 0.10955 | 0.02554 | 0.01766 | 0.00069 | 0.00721 | 0.00302 | -17 | 372 | 106 | 23 | 113 | 4 | 145 | 61 | 1.07 |
| SMS04-01 | 1198 | 910 | 1.32 | 0.04662 | 0.00280 | 0.11186 | 0.00666 | 0.01740 | 0.00037 | 0.00466 | 0.00090 | 30  | 132 | 108 | 6  | 111 | 2 | 94  | 18 | 1.03 |
| SMS04-02 | 1640 | 768 | 2.14 | 0.04683 | 0.00196 | 0.11127 | 0.00478 | 0.01723 | 0.00031 | 0.00407 | 0.00045 | 41  | 91  | 107 | 4  | 110 | 2 | 82  | 9  | 1.03 |
| SMS04-03 | 303  | 293 | 1.03 | 0.05027 | 0.00426 | 0.12027 | 0.01020 | 0.01735 | 0.00035 | 0.00441 | 0.00055 | 207 | 193 | 115 | 9  | 111 | 2 | 89  | 11 | 0.97 |
| SMS04-04 | 649  | 518 | 1.25 | 0.05114 | 0.00413 | 0.12204 | 0.00972 | 0.01731 | 0.00040 | 0.00494 | 0.00123 | 247 | 185 | 117 | 9  | 111 | 3 | 100 | 25 | 0.95 |
| SMS04-05 | 554  | 448 | 1.24 | 0.05192 | 0.00310 | 0.12414 | 0.00744 | 0.01734 | 0.00033 | 0.00512 | 0.00082 | 282 | 139 | 119 | 7  | 111 | 2 | 103 | 16 | 0.93 |
| SMS04-06 | 302  | 322 | 0.94 | 0.05269 | 0.00934 | 0.12633 | 0.02202 | 0.01739 | 0.00067 | 0.00632 | 0.00284 | 315 | 362 | 121 | 20 | 111 | 4 | 127 | 57 | 0.92 |
| SMS04-07 | 456  | 520 | 0.88 | 0.04621 | 0.00357 | 0.10966 | 0.00840 | 0.01721 | 0.00036 | 0.00448 | 0.00106 | 9   | 172 | 106 | 8  | 110 | 2 | 90  | 21 | 1.04 |
| SMS04-08 | 491  | 516 | 0.95 | 0.04853 | 0.00302 | 0.11429 | 0.00712 | 0.01708 | 0.00033 | 0.00546 | 0.00121 | 125 | 140 | 110 | 6  | 109 | 2 | 110 | 24 | 0.99 |
| SMS04-09 | 702  | 594 | 1.18 | 0.04594 | 0.00447 | 0.10995 | 0.01054 | 0.01736 | 0.00046 | 0.00476 | 0.00145 | -5  | 204 | 106 | 10 | 111 | 3 | 96  | 29 | 1.05 |
| SMS04-10 | 246  | 291 | 0.84 | 0.04839 | 0.00561 | 0.11569 | 0.01329 | 0.01734 | 0.00042 | 0.00577 | 0.00182 | 118 | 245 | 111 | 12 | 111 | 3 | 116 | 37 | 1.00 |
| SMS04-11 | 1032 | 805 | 1.28 | 0.04850 | 0.00205 | 0.11548 | 0.00500 | 0.01727 | 0.00031 | 0.00521 | 0.00085 | 124 | 97  | 111 | 5  | 110 | 2 | 105 | 17 | 0.99 |
| SMS04-12 | 1045 | 541 | 1.93 | 0.04612 | 0.00319 | 0.11032 | 0.00764 | 0.01735 | 0.00034 | 0.00608 | 0.00138 | 4   | 153 | 106 | 7  | 111 | 2 | 123 | 28 | 1.05 |
| SMS04-13 | 122  | 156 | 0.78 | 0.04895 | 0.01216 | 0.15147 | 0.03726 | 0.02247 | 0.00092 | 0.00387 | 0.00103 | 145 | 434 | 143 | 33 | 143 | 6 | 78  | 21 | 1.00 |
| SMS04-14 | 218  | 237 | 0.92 | 0.04792 | 0.00990 | 0.11403 | 0.02331 | 0.01726 | 0.00062 | 0.00739 | 0.00355 | 95  | 365 | 110 | 21 | 110 | 4 | 149 | 71 | 1.00 |
| SMS04-15 | 478  | 498 | 0.96 | 0.04805 | 0.00564 | 0.11490 | 0.01330 | 0.01734 | 0.00048 | 0.00682 | 0.00336 | 102 | 245 | 110 | 12 | 111 | 3 | 137 | 67 | 1.01 |
| SMS04-16 | 567  | 747 | 0.76 | 0.04935 | 0.00253 | 0.11736 | 0.00607 | 0.01725 | 0.00032 | 0.00598 | 0.00156 | 164 | 118 | 113 | 6  | 110 | 2 | 121 | 31 | 0.97 |
| SMS04-17 | 415  | 442 | 0.94 | 0.05033 | 0.00462 | 0.12131 | 0.01103 | 0.01748 | 0.00041 | 0.00499 | 0.00163 | 210 | 209 | 116 | 10 | 112 | 3 | 101 | 33 | 0.97 |
| SMS04-18 | 769  | 591 | 1.3  | 0.04915 | 0.00454 | 0.11853 | 0.01082 | 0.01749 | 0.00044 | 0.00495 | 0.00154 | 155 | 209 | 114 | 10 | 112 | 3 | 100 | 31 | 0.98 |
| SMS04-19 | 176  | 175 | 1.01 | 0.04844 | 0.00732 | 0.13020 | 0.01959 | 0.01950 | 0.00048 | 0.00728 | 0.00223 | 121 | 292 | 124 | 18 | 124 | 3 | 147 | 45 | 1.00 |
| SMS04-20 | 453  | 426 | 1.06 | 0.04839 | 0.00329 | 0.11677 | 0.00799 | 0.01750 | 0.00033 | 0.00454 | 0.00099 | 118 | 153 | 112 | 7  | 112 | 2 | 92  | 20 | 1.00 |
| SMS06-01 | 328  | 350 | 0.94 | 0.04772 | 0.00432 | 0.11385 | 0.01031 | 0.01731 | 0.00035 | 0.00497 | 0.00085 | 85  | 201 | 109 | 9  | 111 | 2 | 100 | 17 | 1.02 |
| SMS06-02 | 489  | 500 | 0.98 | 0.04801 | 0.00467 | 0.12604 | 0.01217 | 0.01905 | 0.00047 | 0.00488 | 0.00119 | 100 | 216 | 121 | 11 | 122 | 3 | 98  | 24 | 1.01 |
| SMS06-03 | 193  | 168 | 1.15 | 0.04950 | 0.01520 | 0.13360 | 0.04066 | 0.01960 | 0.00091 | 0.00448 | 0.00140 | 172 | 522 | 127 | 36 | 125 | 6 | 90  | 28 | 0.98 |
| SMS06-04 | 610  | 294 | 2.08 | 0.05204 | 0.01208 | 0.12561 | 0.02878 | 0.01752 | 0.00076 | 0.00486 | 0.00176 | 287 | 428 | 120 | 26 | 112 | 5 | 98  | 35 | 0.93 |
| SMS06-05 | 375  | 317 | 1.18 | 0.05046 | 0.00837 | 0.11909 | 0.01954 | 0.01712 | 0.00054 | 0.00494 | 0.00149 | 216 | 331 | 114 | 18 | 109 | 3 | 100 | 30 | 0.96 |
| SMS06-06 | 352  | 249 | 1.41 | 0.04926 | 0.00925 | 0.11592 | 0.02156 | 0.01707 | 0.00056 | 0.00457 | 0.00158 | 160 | 348 | 111 | 20 | 109 | 4 | 92  | 32 | 0.98 |
| SMS06-07 | 125  | 98  | 1.29 | 0.04865 | 0.01461 | 0.13227 | 0.03950 | 0.01972 | 0.00072 | 0.00517 | 0.00139 | 131 | 506 | 126 | 35 | 126 | 5 | 104 | 28 | 1.00 |
| SMS06-08 | 354  | 268 | 1.32 | 0.05115 | 0.01178 | 0.12263 | 0.02791 | 0.01739 | 0.00073 | 0.00493 | 0.00200 | 248 | 418 | 117 | 25 | 111 | 5 | 99  | 40 | 0.95 |
| SMS06-09 | 248  | 248 | 1    | 0.04744 | 0.00615 | 0.11352 | 0.01467 | 0.01736 | 0.00041 | 0.00518 | 0.00137 | 71  | 259 | 109 | 13 | 111 | 3 | 104 | 28 | 1.02 |
| SMS06-10 | 187  | 176 | 1.06 | 0.04869 | 0.00797 | 0.14489 | 0.02358 | 0.02159 | 0.00060 | 0.00662 | 0.00195 | 133 | 307 | 137 | 21 | 138 | 4 | 133 | 39 | 1.01 |
| SMS06-11 | 174  | 175 | 0.99 | 0.05147 | 0.01448 | 0.12148 | 0.03389 | 0.01712 | 0.00072 | 0.00605 | 0.00219 | 262 | 503 | 116 | 31 | 109 | 5 | 122 | 44 | 0.94 |
| SMS06-12 | 157  | 155 | 1.01 | 0.05086 | 0.01860 | 0.12044 | 0.04370 | 0.01718 | 0.00086 | 0.00421 | 0.00133 | 234 | 640 | 115 | 40 | 110 | 5 | 85  | 27 | 0.96 |
| SMS06-13 | 196  | 235 | 0.83 | 0.04927 | 0.01088 | 0.11854 | 0.02599 | 0.01745 | 0.00060 | 0.00618 | 0.00187 | 161 | 395 | 114 | 24 | 112 | 4 | 125 | 38 | 0.98 |
| SMS06-14 | 352  | 334 | 1.05 | 0.05020 | 0.01080 | 0.13034 | 0.02763 | 0.01885 | 0.00079 | 0.00755 | 0.00491 | 204 | 390 | 124 | 25 | 120 | 5 | 152 | 98 | 0.97 |

|          |      |     |      |         |         |         |         |         |         |         |         |      |      |     |    |     |   |     |    |      |
|----------|------|-----|------|---------|---------|---------|---------|---------|---------|---------|---------|------|------|-----|----|-----|---|-----|----|------|
| SMS06-15 | 379  | 364 | 1.04 | 0.04971 | 0.00641 | 0.11849 | 0.01517 | 0.01729 | 0.00045 | 0.00463 | 0.00121 | 181  | 274  | 114 | 14 | 111 | 3 | 93  | 24 | 0.97 |
| SMS06-16 | 644  | 474 | 1.36 | 0.04690 | 0.00799 | 0.11398 | 0.01913 | 0.01762 | 0.00062 | 0.00311 | 0.00089 | 44   | 303  | 110 | 17 | 113 | 4 | 63  | 18 | 1.03 |
| SMS06-17 | 217  | 233 | 0.93 | 0.05017 | 0.00823 | 0.12081 | 0.01968 | 0.01747 | 0.00048 | 0.00513 | 0.00139 | 203  | 324  | 116 | 18 | 112 | 3 | 103 | 28 | 0.97 |
| SMS06-18 | 150  | 162 | 0.92 | 0.04955 | 0.01961 | 0.11834 | 0.04639 | 0.01733 | 0.00099 | 0.00434 | 0.00174 | 174  | 678  | 114 | 42 | 111 | 6 | 88  | 35 | 0.97 |
| SMS06-19 | 177  | 166 | 1.06 | 0.04769 | 0.01052 | 0.11618 | 0.02552 | 0.01767 | 0.00052 | 0.00493 | 0.00142 | 84   | 382  | 112 | 23 | 113 | 3 | 99  | 29 | 1.01 |
| SMS06-20 | 323  | 243 | 1.33 | 0.04514 | 0.01769 | 0.10973 | 0.04262 | 0.01763 | 0.00098 | 0.00367 | 0.00144 | -12  | 629  | 106 | 39 | 113 | 6 | 74  | 29 | 1.07 |
| SMS07-01 | 376  | 204 | 1.84 | 0.05045 | 0.00814 | 0.11497 | 0.01827 | 0.01654 | 0.00056 | 0.00332 | 0.00063 | 216  | 326  | 111 | 17 | 106 | 4 | 67  | 13 | 0.95 |
| SMS07-02 | 469  | 245 | 1.91 | 0.04725 | 0.00568 | 0.10808 | 0.01288 | 0.01659 | 0.00042 | 0.00375 | 0.00058 | 62   | 244  | 104 | 12 | 106 | 3 | 76  | 12 | 1.02 |
| SMS07-03 | 244  | 159 | 1.53 | 0.04850 | 0.00797 | 0.11095 | 0.01806 | 0.01659 | 0.00049 | 0.00365 | 0.00071 | 124  | 306  | 107 | 17 | 106 | 3 | 74  | 14 | 0.99 |
| SMS07-04 | 255  | 146 | 1.75 | 0.04823 | 0.01705 | 0.10822 | 0.03781 | 0.01629 | 0.00097 | 0.00376 | 0.00153 | 111  | 589  | 104 | 35 | 104 | 6 | 76  | 31 | 1.00 |
| SMS07-05 | 193  | 122 | 1.59 | 0.04878 | 0.01342 | 0.11099 | 0.03024 | 0.01651 | 0.00071 | 0.00407 | 0.00122 | 137  | 467  | 107 | 28 | 106 | 5 | 82  | 25 | 0.99 |
| SMS07-06 | 305  | 190 | 1.6  | 0.04827 | 0.01091 | 0.10986 | 0.02452 | 0.01651 | 0.00067 | 0.00418 | 0.00147 | 113  | 393  | 106 | 22 | 106 | 4 | 84  | 30 | 1.00 |
| SMS07-07 | 424  | 211 | 2.01 | 0.04829 | 0.00533 | 0.11087 | 0.01217 | 0.01665 | 0.00037 | 0.00423 | 0.00091 | 114  | 238  | 107 | 11 | 106 | 2 | 85  | 18 | 0.99 |
| SMS07-08 | 294  | 167 | 1.76 | 0.04699 | 0.00890 | 0.10843 | 0.02034 | 0.01674 | 0.00056 | 0.00426 | 0.00139 | 49   | 333  | 105 | 19 | 107 | 4 | 86  | 28 | 1.02 |
| SMS07-09 | 233  | 140 | 1.66 | 0.04754 | 0.00897 | 0.11043 | 0.02069 | 0.01685 | 0.00050 | 0.00482 | 0.00135 | 76   | 334  | 106 | 19 | 108 | 3 | 97  | 27 | 1.02 |
| SMS07-11 | 237  | 125 | 1.89 | 0.04694 | 0.01173 | 0.10855 | 0.02692 | 0.01678 | 0.00062 | 0.00536 | 0.00190 | 46   | 414  | 105 | 25 | 107 | 4 | 108 | 38 | 1.02 |
| SMS07-12 | 213  | 124 | 1.72 | 0.04769 | 0.00896 | 0.11090 | 0.02071 | 0.01687 | 0.00046 | 0.00548 | 0.00144 | 84   | 333  | 107 | 19 | 108 | 3 | 110 | 29 | 1.01 |
| SMS07-13 | 219  | 137 | 1.6  | 0.05156 | 0.00894 | 0.11734 | 0.02021 | 0.01651 | 0.00047 | 0.00589 | 0.00151 | 266  | 350  | 113 | 18 | 106 | 3 | 119 | 30 | 0.94 |
| SMS07-14 | 223  | 141 | 1.59 | 0.04639 | 0.01394 | 0.10567 | 0.03150 | 0.01652 | 0.00073 | 0.00595 | 0.00191 | 18   | 489  | 102 | 29 | 106 | 5 | 120 | 38 | 1.04 |
| SMS07-15 | 150  | 99  | 1.52 | 0.04772 | 0.01289 | 0.11103 | 0.02980 | 0.01687 | 0.00062 | 0.00537 | 0.00174 | 85   | 448  | 107 | 27 | 108 | 4 | 108 | 35 | 1.01 |
| SMS07-16 | 260  | 145 | 1.79 | 0.04760 | 0.00752 | 0.11045 | 0.01736 | 0.01683 | 0.00042 | 0.00477 | 0.00101 | 79   | 291  | 106 | 16 | 108 | 3 | 96  | 20 | 1.02 |
| SMS07-17 | 274  | 158 | 1.73 | 0.04733 | 0.00749 | 0.11058 | 0.01740 | 0.01694 | 0.00044 | 0.00526 | 0.00152 | 66   | 289  | 106 | 16 | 108 | 3 | 106 | 31 | 1.02 |
| SMS07-18 | 250  | 144 | 1.74 | 0.04978 | 0.00855 | 0.11353 | 0.01934 | 0.01654 | 0.00048 | 0.00582 | 0.00194 | 185  | 326  | 109 | 18 | 106 | 3 | 117 | 39 | 0.97 |
| SMS07-19 | 200  | 116 | 1.72 | 0.04703 | 0.00983 | 0.10945 | 0.02274 | 0.01688 | 0.00051 | 0.00595 | 0.00213 | 51   | 359  | 105 | 21 | 108 | 3 | 120 | 43 | 1.03 |
| SMS07-20 | 409  | 161 | 2.55 | 0.04057 | 0.00693 | 0.09178 | 0.01560 | 0.01641 | 0.00040 | 0.00557 | 0.00209 | -257 | 260  | 89  | 15 | 105 | 3 | 112 | 42 | 1.18 |
| SMS08-01 | 494  | 331 | 1.49 | 0.05021 | 0.00213 | 0.11381 | 0.00467 | 0.01655 | 0.00019 | 0.00432 | 0.00016 | 206  | 100  | 109 | 4  | 106 | 1 | 87  | 3  | 0.97 |
| SMS08-02 | 437  | 468 | 0.93 | 0.05107 | 0.00263 | 0.11542 | 0.00574 | 0.01658 | 0.00023 | 0.00415 | 0.00018 | 243  | 123  | 111 | 5  | 106 | 1 | 84  | 4  | 0.95 |
| SMS08-03 | 281  | 253 | 1.11 | 0.05474 | 0.00368 | 0.12408 | 0.00754 | 0.01696 | 0.00026 | 0.00438 | 0.00022 | 467  | 152  | 119 | 7  | 108 | 2 | 88  | 4  | 0.91 |
| SMS08-04 | 336  | 329 | 1.02 | 0.05755 | 0.00396 | 0.12924 | 0.00818 | 0.01665 | 0.00031 | 0.00421 | 0.00022 | 522  | 152  | 123 | 7  | 106 | 2 | 85  | 4  | 0.86 |
| SMS08-05 | 270  | 258 | 1.05 | 0.05291 | 0.00335 | 0.11881 | 0.00750 | 0.01672 | 0.00033 | 0.00427 | 0.00026 | 324  | 143  | 114 | 7  | 107 | 2 | 86  | 5  | 0.94 |
| SMS08-06 | 474  | 518 | 0.92 | 0.04850 | 0.00300 | 0.11190 | 0.00648 | 0.01688 | 0.00024 | 0.00457 | 0.00026 | 124  | 141  | 108 | 6  | 108 | 2 | 92  | 5  | 1.00 |
| SMS08-07 | 201  | 230 | 0.88 | 0.05351 | 0.00480 | 0.12515 | 0.01106 | 0.01702 | 0.00031 | 0.00450 | 0.00026 | 350  | 171  | 120 | 10 | 109 | 2 | 91  | 5  | 0.91 |
| SMS08-08 | 305  | 333 | 0.92 | 0.04992 | 0.00275 | 0.11391 | 0.00565 | 0.01681 | 0.00023 | 0.00459 | 0.00030 | 191  | 132  | 110 | 5  | 107 | 1 | 93  | 6  | 0.97 |
| SMS08-09 | 134  | 143 | 0.94 | 0.04982 | 0.00671 | 0.11259 | 0.01473 | 0.01674 | 0.00053 | 0.00502 | 0.00032 | 187  | 285  | 108 | 13 | 107 | 3 | 101 | 6  | 0.99 |
| SMS08-10 | 190  | 251 | 0.76 | 0.04902 | 0.00425 | 0.11313 | 0.00928 | 0.01694 | 0.00036 | 0.00449 | 0.00022 | 150  | 189  | 109 | 8  | 108 | 2 | 91  | 4  | 0.99 |
| SMS08-11 | 168  | 177 | 0.95 | 0.05688 | 0.00325 | 0.12661 | 0.00713 | 0.01672 | 0.00028 | 0.00437 | 0.00020 | 487  | 121  | 121 | 6  | 107 | 2 | 88  | 4  | 0.88 |
| SMS08-12 | 192  | 199 | 0.96 | 0.04961 | 0.00377 | 0.11462 | 0.00890 | 0.01667 | 0.00035 | 0.00401 | 0.00019 | 176  | 170  | 110 | 8  | 107 | 2 | 81  | 4  | 0.97 |
| SMS08-13 | 315  | 374 | 0.84 | 0.04900 | 0.00302 | 0.10967 | 0.00596 | 0.01674 | 0.00036 | 0.00418 | 0.00020 | 146  | 141  | 106 | 5  | 107 | 2 | 84  | 4  | 1.01 |
| SMS08-14 | 210  | 259 | 0.81 | 0.04912 | 0.00270 | 0.11041 | 0.00562 | 0.01676 | 0.00024 | 0.00395 | 0.00016 | 154  | 128  | 106 | 5  | 107 | 2 | 80  | 3  | 1.01 |
| SMS08-15 | 327  | 454 | 0.72 | 0.05071 | 0.00295 | 0.11841 | 0.00699 | 0.01694 | 0.00027 | 0.00407 | 0.00019 | 228  | 140  | 114 | 6  | 108 | 2 | 82  | 4  | 0.95 |
| SMS08-16 | 207  | 268 | 0.77 | 0.05141 | 0.00618 | 0.11987 | 0.01445 | 0.01665 | 0.00050 | 0.00372 | 0.00023 | 257  | 265  | 115 | 13 | 106 | 3 | 75  | 5  | 0.92 |
| SMS08-17 | 434  | 423 | 1.02 | 0.04973 | 0.00377 | 0.11544 | 0.00901 | 0.01674 | 0.00019 | 0.00361 | 0.00016 | 189  | 161  | 111 | 8  | 107 | 1 | 73  | 3  | 0.96 |
| SMS08-18 | 187  | 207 | 0.9  | 0.05529 | 0.00512 | 0.12444 | 0.01127 | 0.01666 | 0.00037 | 0.00380 | 0.00019 | 433  | 203  | 119 | 10 | 107 | 2 | 77  | 4  | 0.90 |
| SMS08-19 | 121  | 148 | 0.82 | 0.05653 | 0.00532 | 0.13073 | 0.01260 | 0.01678 | 0.00045 | 0.00399 | 0.00019 | 472  | 242  | 125 | 11 | 107 | 3 | 80  | 4  | 0.86 |
| SMS08-20 | 169  | 224 | 0.75 | 0.05367 | 0.00438 | 0.12409 | 0.01076 | 0.01693 | 0.00037 | 0.00448 | 0.00021 | 367  | 185  | 119 | 10 | 108 | 2 | 90  | 4  | 0.91 |
| SMS10-01 | 385  | 512 | 0.75 | 0.05172 | 0.00220 | 0.11523 | 0.00477 | 0.01628 | 0.00017 | 0.00359 | 0.00013 | 272  | 98   | 111 | 4  | 104 | 1 | 72  | 3  | 0.94 |
| SMS10-02 | 557  | 658 | 0.85 | 0.05013 | 0.00153 | 0.11432 | 0.00358 | 0.01653 | 0.00015 | 0.00364 | 0.00011 | 211  | 103  | 110 | 3  | 106 | 1 | 73  | 2  | 0.96 |
| SMS10-03 | 1001 | 959 | 1.04 | 0.04874 | 0.00142 | 0.10992 | 0.00312 | 0.01638 | 0.00014 | 0.00349 | 0.00011 | 200  | 73   | 106 | 3  | 105 | 1 | 70  | 2  | 0.99 |
| SMS10-04 | 404  | 530 | 0.76 | 0.05173 | 0.00247 | 0.11520 | 0.00530 | 0.01629 | 0.00020 | 0.00338 | 0.00013 | 272  | 111  | 111 | 5  | 104 | 1 | 68  | 3  | 0.94 |
| SMS10-05 | 611  | 653 | 0.93 | 0.04781 | 0.00171 | 0.10897 | 0.00374 | 0.01664 | 0.00015 | 0.00338 | 0.00012 | 100  | -114 | 105 | 3  | 106 | 1 | 68  | 2  | 1.01 |
| SMS10-06 | 518  | 394 | 1.32 | 0.04908 | 0.00253 | 0.10984 | 0.00537 | 0.01655 | 0.00020 | 0.00338 | 0.00013 | 150  | 150  | 106 | 5  | 106 | 1 | 68  | 3  | 1.00 |
| SMS10-07 | 319  | 366 | 0.87 | 0.05024 | 0.00263 | 0.11312 | 0.00591 | 0.01655 | 0.00021 | 0.00367 | 0.00013 | 206  | 122  | 109 | 5  | 106 | 1 | 74  | 3  | 0.97 |
| SMS10-08 | 335  | 181 | 1.86 | 0.05257 | 0.00408 | 0.12021 | 0.00967 | 0.01647 | 0.00033 | 0.00371 | 0.00014 | 309  | 176  | 115 | 9  | 105 | 2 | 75  | 3  | 0.91 |
| SMS10-09 | 435  | 511 | 0.85 | 0.04612 | 0.00179 | 0.10494 | 0.00406 | 0.01658 | 0.00018 | 0.00364 | 0.00012 | 400  | -306 | 101 | 4  | 106 | 1 | 73  | 2  | 1.05 |
| SMS10-10 | 738  | 811 | 0.91 | 0.05086 | 0.00344 | 0.11289 | 0.00694 | 0.01627 | 0.00030 | 0.00369 | 0.00017 | 235  | 153  | 109 | 6  | 104 | 2 | 74  | 3  | 0.95 |
| SMS10-11 | 317  | 372 | 0.85 | 0.05077 | 0.00238 | 0.11508 | 0.00550 | 0.01647 | 0.00022 | 0.00433 | 0.00018 | 232  | 114  | 111 | 5  | 105 | 1 | 87  | 4  | 0.95 |
| SMS10-12 | 607  | 749 | 0.81 | 0.04628 | 0.00202 | 0.10418 | 0.00451 | 0.01638 | 0.00016 | 0.00406 | 0.00014 | 13   | 109  | 101 | 4  | 105 | 1 | 82  | 3  | 1.04 |
| SMS10-14 | 512  | 600 | 0.85 | 0.05015 | 0.00191 | 0.11344 | 0.00450 | 0.01644 | 0.00018 | 0.00429 | 0.00017 | 211  | 89   | 109 | 4  | 105 | 1 | 86  | 4  | 0.96 |
| SMS10-15 | 569  | 431 | 1.32 | 0.04867 | 0.00316 | 0.10788 | 0.00664 | 0.01643 | 0.00024 | 0.00435 | 0.00020 | 132  | 144  | 104 | 6  | 105 | 2 | 88  | 4  | 1.01 |
| SMS10-16 | 277  | 407 | 0.68 | 0.05011 | 0.00341 | 0.11331 | 0.00814 | 0.01629 | 0.00026 | 0.00457 | 0.00025 | 211  | 157  | 109 | 7  | 104 | 2 | 92  | 5  | 0.95 |
| SMS10-17 | 159  | 213 | 0.75 | 0.05122 | 0.00498 | 0.11491 | 0.01127 | 0.01645 | 0.00037 | 0.00450 | 0.0003  |      |      |     |    |     |   |     |    |      |

|                        |                |                |                 |         |         |                   |                   |                   |                   |         |         |     |     |     |    |     |   |                |              |      |
|------------------------|----------------|----------------|-----------------|---------|---------|-------------------|-------------------|-------------------|-------------------|---------|---------|-----|-----|-----|----|-----|---|----------------|--------------|------|
| 08JH 440 01            | 172            | 241            | 0.71            |         |         | 0.1614            | 0.0045            | 0.0209            | 0.0005            |         |         |     |     |     |    |     |   | 134            | 3            |      |
| 08JH 440 02            | 254            | 404            | 0.63            |         |         | 0.1428            | 0.0041            | 0.0210            | 0.0005            |         |         |     |     |     |    |     |   | 134            | 3            |      |
| 08JH 440 03            | 125            | 149            | 0.84            |         |         | 0.1415            | 0.0092            | 0.0201            | 0.0007            |         |         |     |     |     |    |     |   | 128            | 4            |      |
| 08JH 440 04            | 73             | 124            | 0.58            |         |         | 0.1635            | 0.0063            | 0.0208            | 0.0005            |         |         |     |     |     |    |     |   | 133            | 3            |      |
| 08JH 440 05            | 123            | 113            | 1.08            |         |         | 0.1537            | 0.0064            | 0.0204            | 0.0005            |         |         |     |     |     |    |     |   | 130            | 3            |      |
| 08JH 440 06            | 265            | 201            | 1.32            |         |         | 0.1536            | 0.0053            | 0.0209            | 0.0005            |         |         |     |     |     |    |     |   | 133            | 3            |      |
| 08JH 440 07            | 352            | 487            | 0.72            |         |         | 0.1689            | 0.0100            | 0.0202            | 0.0005            |         |         |     |     |     |    |     |   | 129            | 3            |      |
| 08JH 440 08            | 142            | 223            | 0.64            |         |         | 0.1486            | 0.0046            | 0.0205            | 0.0005            |         |         |     |     |     |    |     |   | 131            | 3            |      |
| 08JH 440 09            | 102            | 105            | 0.97            |         |         | 0.1378            | 0.0079            | 0.0207            | 0.0006            |         |         |     |     |     |    |     |   | 132            | 4            |      |
| 08JH 440 10            | 176            | 272            | 0.65            |         |         | 0.1388            | 0.0045            | 0.0205            | 0.0005            |         |         |     |     |     |    |     |   | 131            | 3            |      |
| 08JH 440 11            | 97             | 158            | 0.62            |         |         | 0.1362            | 0.0051            | 0.0206            | 0.0005            |         |         |     |     |     |    |     |   | 131            | 3            |      |
| 08JH 440 12            | 325            | 286            | 1.13            |         |         | 0.1722            | 0.0180            | 0.0200            | 0.0006            |         |         |     |     |     |    |     |   | 128            | 4            |      |
| 08JH 440 13            | 285            | 255            | 1.11            |         |         | 0.1366            | 0.0055            | 0.0199            | 0.0005            |         |         |     |     |     |    |     |   | 127            | 3            |      |
| <del>08JH 440 14</del> | <del>30</del>  | <del>53</del>  | <del>0.56</del> |         |         | <del>0.1589</del> | <del>0.0324</del> | <del>0.0215</del> | <del>0.0012</del> |         |         |     |     |     |    |     |   | <del>137</del> | <del>7</del> |      |
| 08JH 440 15            | 63             | 82             | 0.77            |         |         | 0.1400            | 0.0163            | 0.0204            | 0.0007            |         |         |     |     |     |    |     |   | 130            | 4            |      |
| 08JH 440 16            | 127            | 151            | 0.84            |         |         | 0.1471            | 0.0059            | 0.0204            | 0.0005            |         |         |     |     |     |    |     |   | 130            | 3            |      |
| 08JH 440 17            | 191            | 216            | 0.88            |         |         | 0.1762            | 0.0086            | 0.0209            | 0.0006            |         |         |     |     |     |    |     |   | 133            | 4            |      |
| 08JH 440 18            | 84             | 143            | 0.59            |         |         | 0.1466            | 0.0080            | 0.0204            | 0.0006            |         |         |     |     |     |    |     |   | 130            | 4            |      |
| 08JH 440 19            | 173            | 281            | 0.62            |         |         | 0.1381            | 0.0040            | 0.0204            | 0.0004            |         |         |     |     |     |    |     |   | 130            | 3            |      |
| 08JH 440 20            | 198            | 265            | 0.75            |         |         | 0.1497            | 0.0038            | 0.0208            | 0.0004            |         |         |     |     |     |    |     |   | 132            | 3            |      |
| 08JH 440 21            | 249            | 266            | 0.93            |         |         | 0.1379            | 0.0051            | 0.0201            | 0.0005            |         |         |     |     |     |    |     |   | 128            | 3            |      |
| 08JH 440 22            | 270            | 412            | 0.66            |         |         | 0.1467            | 0.0032            | 0.0206            | 0.0004            |         |         |     |     |     |    |     |   | 131            | 3            |      |
| 08JH 440 23            | 189            | 256            | 0.74            |         |         | 0.1572            | 0.0057            | 0.0202            | 0.0005            |         |         |     |     |     |    |     |   | 129            | 3            |      |
| 08JH 440 24            | 390            | 369            | 1.06            |         |         | 0.1428            | 0.0040            | 0.0205            | 0.0005            |         |         |     |     |     |    |     |   | 131            | 3            |      |
|                        |                |                |                 |         |         |                   |                   |                   |                   |         |         |     |     |     |    |     |   |                |              |      |
| 08JH454 01             | 241            | 332            | 0.73            |         |         | 0.1515            | 0.0040            | 0.0222            | 0.0004            |         |         |     |     |     |    |     |   | 142            | 3            |      |
| 08JH454 02             | 250            | 285            | 0.88            |         |         | 0.1476            | 0.0069            | 0.0221            | 0.0006            |         |         |     |     |     |    |     |   | 141            | 4            |      |
| 08JH454 03             | 196            | 309            | 0.63            |         |         | 0.1457            | 0.0045            | 0.0219            | 0.0005            |         |         |     |     |     |    |     |   | 140            | 3            |      |
| 08JH454 04             | 181            | 285            | 0.63            |         |         | 0.1495            | 0.0070            | 0.0220            | 0.0006            |         |         |     |     |     |    |     |   | 140            | 4            |      |
| 08JH454 05             | 331            | 523            | 0.63            |         |         | 0.1457            | 0.0039            | 0.0222            | 0.0004            |         |         |     |     |     |    |     |   | 142            | 3            |      |
| 08JH454 06             | 409            | 404            | 1.01            |         |         | 0.1528            | 0.0049            | 0.0226            | 0.0005            |         |         |     |     |     |    |     |   | 144            | 3            |      |
| 08JH454 07             | 883            | 1293           | 0.68            |         |         | 0.1484            | 0.0039            | 0.0224            | 0.0004            |         |         |     |     |     |    |     |   | 143            | 3            |      |
| 08JH454 08             | 354            | 367            | 0.96            |         |         | 0.1612            | 0.0083            | 0.0221            | 0.0006            |         |         |     |     |     |    |     |   | 141            | 4            |      |
| 08JH454 09             | 163            | 350            | 0.47            |         |         | 0.1566            | 0.0065            | 0.0227            | 0.0006            |         |         |     |     |     |    |     |   | 145            | 3            |      |
| 08JH454 10             | 319            | 483            | 0.66            |         |         | 0.1521            | 0.0033            | 0.0224            | 0.0004            |         |         |     |     |     |    |     |   | 143            | 3            |      |
| <del>08JH454 11</del>  | <del>154</del> | <del>230</del> | <del>0.67</del> |         |         | <del>0.1657</del> | <del>0.0137</del> | <del>0.0239</del> | <del>0.0010</del> |         |         |     |     |     |    |     |   | <del>152</del> | <del>6</del> |      |
| 08JH454 12             | 598            | 1261           | 0.47            |         |         | 0.1585            | 0.0041            | 0.0230            | 0.0004            |         |         |     |     |     |    |     |   | 146            | 3            |      |
| 08JH454 13             | 373            | 536            | 0.70            |         |         | 0.1725            | 0.0079            | 0.0226            | 0.0006            |         |         |     |     |     |    |     |   | 144            | 4            |      |
| 08JH454 14             | 134            | 183            | 0.73            |         |         | 0.1206            | 0.0099            | 0.0190            | 0.0006            |         |         |     |     |     |    |     |   | 121            | 4            |      |
| 08JH454 15             | 160            | 198            | 0.81            |         |         | 0.1554            | 0.0105            | 0.0221            | 0.0008            |         |         |     |     |     |    |     |   | 141            | 5            |      |
| 08JH454 16             | 599            | 522            | 1.15            |         |         | 0.1554            | 0.0046            | 0.0220            | 0.0005            |         |         |     |     |     |    |     |   | 140            | 3            |      |
| 08JH454 17             | 625            | 539            | 1.16            |         |         | 0.1680            | 0.0060            | 0.0208            | 0.0005            |         |         |     |     |     |    |     |   | 133            | 3            |      |
| 08JH454 18             | 347            | 390            | 0.89            |         |         | 0.1592            | 0.0071            | 0.0209            | 0.0006            |         |         |     |     |     |    |     |   | 133            | 3            |      |
| 08JH454 19             | 203            | 261            | 0.78            |         |         | 0.1673            | 0.0146            | 0.0213            | 0.0010            |         |         |     |     |     |    |     |   | 136            | 6            |      |
| 08JH454 20             | 191            | 194            | 0.99            |         |         | 0.1590            | 0.0081            | 0.0214            | 0.0006            |         |         |     |     |     |    |     |   | 136            | 4            |      |
| 08JH454 21             | 231            | 268            | 0.86            |         |         | 0.1513            | 0.0090            | 0.0209            | 0.0007            |         |         |     |     |     |    |     |   | 133            | 4            |      |
| 08JH454 22             | 264            | 406            | 0.65            |         |         | 0.1541            | 0.0086            | 0.0214            | 0.0006            |         |         |     |     |     |    |     |   | 136            | 4            |      |
| 08JH454 23             | 352            | 474            | 0.74            |         |         | 0.1487            | 0.0062            | 0.0219            | 0.0005            |         |         |     |     |     |    |     |   | 140            | 3            |      |
| 08JH454 24             | 262            | 289            | 0.91            |         |         | 0.1585            | 0.0048            | 0.0219            | 0.0005            |         |         |     |     |     |    |     |   | 140            | 3            |      |
|                        |                |                |                 |         |         |                   |                   |                   |                   |         |         |     |     |     |    |     |   |                |              |      |
| 08JH-460@1             | 103            | 252            | 0.41            |         |         | 0.144             | 2.49              | 0.021             | 1.51              |         |         |     |     |     |    |     |   | 133            | 2            |      |
| 08JH-460@2             | 508            | 757            | 0.67            |         |         | 0.133             | 6.04              | 0.021             | 1.51              |         |         |     |     |     |    |     |   | 134            | 2            |      |
| 08JH-460@3             | 145            | 157            | 0.92            |         |         | 0.144             | 4.48              | 0.021             | 1.55              |         |         |     |     |     |    |     |   | 133            | 2            |      |
| 08JH-460@4             | 116            | 255            | 0.45            |         |         | 0.137             | 2.51              | 0.021             | 1.50              |         |         |     |     |     |    |     |   | 132            | 2            |      |
| 08JH-460@5             | 154            | 252            | 0.61            |         |         | 0.138             | 3.03              | 0.021             | 1.54              |         |         |     |     |     |    |     |   | 132            | 2            |      |
| 08JH-460@6             | 231            | 378            | 0.61            |         |         | 0.139             | 2.54              | 0.021             | 1.50              |         |         |     |     |     |    |     |   | 134            | 2            |      |
| 08JH-460@7             | 148            | 211            | 0.70            |         |         | 0.136             | 4.04              | 0.021             | 1.51              |         |         |     |     |     |    |     |   | 134            | 2            |      |
| 08JH-460@8             | 260            | 230            | 1.13            |         |         | 0.138             | 2.92              | 0.021             | 1.52              |         |         |     |     |     |    |     |   | 132            | 2            |      |
| 08JH-460@9             | 46             | 113            | 0.41            |         |         | 0.142             | 3.33              | 0.021             | 1.55              |         |         |     |     |     |    |     |   | 133            | 2            |      |
| 08JH-460@10            | 129            | 253            | 0.51            |         |         | 0.133             | 3.20              | 0.021             | 1.54              |         |         |     |     |     |    |     |   | 132            | 2            |      |
| 08JH-460@11            | 542            | 423            | 1.28            |         |         | 0.142             | 2.23              | 0.021             | 1.60              |         |         |     |     |     |    |     |   | 135            | 2            |      |
| 08JH-460@12            | 428            | 649            | 0.66            |         |         | 0.146             | 4.50              | 0.021             | 1.53              |         |         |     |     |     |    |     |   | 133            | 2            |      |
| 08JH-460@13            | 100            | 104            | 0.96            |         |         | 0.128             | 4.57              | 0.021             | 1.55              |         |         |     |     |     |    |     |   | 132            | 2            |      |
| 08JH-460@14            | 100            | 110            | 0.91            |         |         | 0.130             | 5.62              | 0.020             | 1.59              |         |         |     |     |     |    |     |   | 131            | 2            |      |
| 08JH-460@15            | 1665           | 2640           | 0.63            |         |         | 0.146             | 1.63              | 0.022             | 1.50              |         |         |     |     |     |    |     |   | 141            | 2            |      |
| 08JH-460@16            | 274            | 225            | 1.22            |         |         | 0.141             | 2.59              | 0.021             | 1.52              |         |         |     |     |     |    |     |   | 134            | 2            |      |
| 08JH-460@17            | 395            | 309            | 1.28            |         |         | 0.137             | 2.66              | 0.021             | 1.51              |         |         |     |     |     |    |     |   | 135            | 2            |      |
| 08JH-460@18            | 298            | 282            | 1.05            |         |         | 0.142             | 2.40              | 0.021             | 1.51              |         |         |     |     |     |    |     |   | 133            | 2            |      |
| 08JH-460@19            | 1025           | 1362           | 0.75            |         |         | 0.140             | 2.50              | 0.021             | 1.50              |         |         |     |     |     |    |     |   | 132            | 2            |      |
| 08JH-460@20            | 106            | 118            | 0.89            |         |         | 0.135             | 7.15              | 0.021             | 1.50              |         |         |     |     |     |    |     |   | 133            | 2            |      |
|                        |                |                |                 |         |         |                   |                   |                   |                   |         |         |     |     |     |    |     |   |                |              |      |
| NY23-01                | 221            | 276            | 0.8             | 0.05151 | 0.00226 | 0.15999           | 0.00710           | 0.02274           | 0.00027           | 0.00612 | 0.00027 | 265 | 97  | 151 | 6  | 145 | 2 | 123            | 5            | 0.96 |
| NY23-04                | 122            | 189            | 0.65            | 0.05455 | 0.00650 | 0.16680           | 0.01845           | 0.02277           | 0.00049           | 0.00640 | 0.00043 | 394 | 270 | 157 | 16 |     |   |                |              |      |

|         |      |     |      |         |         |         |         |         |         |         |         |       |     |     |    |     |   |     |     |      |
|---------|------|-----|------|---------|---------|---------|---------|---------|---------|---------|---------|-------|-----|-----|----|-----|---|-----|-----|------|
| NY23-19 | 319  | 275 | 1.16 | 0.05447 | 0.00237 | 0.16804 | 0.00694 | 0.02273 | 0.00025 | 0.00638 | 0.00021 | 391   | 94  | 158 | 6  | 145 | 2 | 128 | 4   | 0.92 |
| NY23-20 | 199  | 193 | 1.03 | 0.05529 | 0.00586 | 0.17198 | 0.01569 | 0.02297 | 0.00053 | 0.00581 | 0.00026 | 433   | 237 | 161 | 14 | 146 | 3 | 117 | 5   | 0.91 |
| NY25-01 | 112  | 170 | 0.66 | 0.04819 | 0.00747 | 0.14861 | 0.02133 | 0.02279 | 0.00062 | 0.00596 | 0.00054 | 109   | 330 | 141 | 19 | 145 | 4 | 120 | 11  | 1.03 |
| NY25-02 | 217  | 498 | 0.44 | 0.05318 | 0.00190 | 0.16411 | 0.00577 | 0.02305 | 0.00044 | 0.01416 | 0.00831 | 345   | 81  | 154 | 5  | 147 | 3 | 284 | 166 | 0.95 |
| NY25-03 | 182  | 226 | 0.81 | 0.05350 | 0.00245 | 0.16215 | 0.00696 | 0.02250 | 0.00025 | 0.00617 | 0.00023 | 350   | 104 | 153 | 6  | 143 | 2 | 124 | 5   | 0.93 |
| NY25-05 | 291  | 396 | 0.73 | 0.05222 | 0.00185 | 0.16129 | 0.00561 | 0.02262 | 0.00025 | 0.00599 | 0.00023 | 295   | 80  | 152 | 5  | 144 | 2 | 121 | 5   | 0.95 |
| NY25-06 | 194  | 303 | 0.64 | 0.04458 | 0.00194 | 0.13766 | 0.00604 | 0.02239 | 0.00024 | 0.00620 | 0.00024 | error |     | 131 | 5  | 143 | 2 | 125 | 5   | 1.09 |
| NY25-07 | 177  | 184 | 0.96 | 0.04876 | 0.00248 | 0.15126 | 0.00785 | 0.02295 | 0.00036 | 0.00642 | 0.00026 | 200   | 119 | 143 | 7  | 146 | 2 | 129 | 5   | 1.02 |
| NY25-08 | 157  | 200 | 0.79 | 0.05345 | 0.00660 | 0.16813 | 0.02355 | 0.02268 | 0.00035 | 0.00620 | 0.00026 | 346   | 281 | 158 | 20 | 145 | 2 | 125 | 5   | 0.92 |
| NY25-09 | 271  | 313 | 0.86 | 0.05473 | 0.00283 | 0.16857 | 0.00877 | 0.02227 | 0.00026 | 0.00621 | 0.00021 | 467   | 121 | 158 | 8  | 142 | 2 | 125 | 4   | 0.90 |
| NY25-10 | 298  | 262 | 1.14 | 0.05169 | 0.00254 | 0.15890 | 0.00728 | 0.02284 | 0.00027 | 0.00618 | 0.00023 | 272   | 118 | 150 | 6  | 146 | 2 | 124 | 5   | 0.97 |
| NY25-11 | 294  | 417 | 0.71 | 0.04800 | 0.00171 | 0.14890 | 0.00524 | 0.02256 | 0.00024 | 0.00619 | 0.00021 | 98    | 88  | 141 | 5  | 144 | 2 | 125 | 4   | 1.02 |
| NY25-13 | 283  | 472 | 0.6  | 0.05739 | 0.00323 | 0.17491 | 0.00884 | 0.02245 | 0.00029 | 0.00651 | 0.00029 | 506   | 129 | 164 | 8  | 143 | 2 | 131 | 6   | 0.87 |
| NY25-14 | 236  | 300 | 0.79 | 0.05248 | 0.00232 | 0.16010 | 0.00638 | 0.02261 | 0.00027 | 0.00631 | 0.00023 | 306   | 97  | 151 | 6  | 144 | 2 | 127 | 5   | 0.95 |
| NY25-15 | 186  | 186 | 1    | 0.05513 | 0.00444 | 0.16698 | 0.01241 | 0.02248 | 0.00058 | 0.00615 | 0.00027 | 417   | 177 | 157 | 11 | 143 | 4 | 124 | 5   | 0.91 |
| NY25-16 | 86   | 111 | 0.77 | 0.05595 | 0.00818 | 0.16719 | 0.02499 | 0.02204 | 0.00073 | 0.00615 | 0.00056 | 450   | 330 | 157 | 22 | 141 | 5 | 124 | 11  | 0.90 |
| NY25-17 | 473  | 492 | 0.96 | 0.05119 | 0.00233 | 0.16143 | 0.00735 | 0.02295 | 0.00028 | 0.00641 | 0.00024 | 250   | 104 | 152 | 6  | 146 | 2 | 129 | 5   | 0.96 |
| NY25-18 | 230  | 221 | 1.04 | 0.04886 | 0.00256 | 0.15017 | 0.00774 | 0.02258 | 0.00029 | 0.00635 | 0.00023 | 143   | 124 | 142 | 7  | 144 | 2 | 128 | 5   | 1.01 |
| NY25-19 | 207  | 275 | 0.75 | 0.05177 | 0.00271 | 0.15843 | 0.00792 | 0.02259 | 0.00028 | 0.00610 | 0.00022 | 276   | 120 | 149 | 7  | 144 | 2 | 123 | 4   | 0.97 |
| NY25-20 | 484  | 394 | 1.23 | 0.04921 | 0.00208 | 0.15017 | 0.00602 | 0.02240 | 0.00023 | 0.00629 | 0.00025 | 167   | 98  | 142 | 5  | 143 | 1 | 127 | 5   | 1.01 |
| NY26-01 | 282  | 317 | 0.89 | 0.05209 | 0.00269 | 0.16161 | 0.00838 | 0.02249 | 0.00032 | 0.00641 | 0.00024 | 300   | 151 | 152 | 7  | 143 | 2 | 129 | 5   | 0.94 |
| NY26-02 | 142  | 184 | 0.78 | 0.04992 | 0.00270 | 0.15380 | 0.00831 | 0.02258 | 0.00039 | 0.00639 | 0.00023 | 191   | 131 | 145 | 7  | 144 | 2 | 129 | 5   | 0.99 |
| NY26-03 | 167  | 239 | 0.7  | 0.05505 | 0.00240 | 0.16457 | 0.00685 | 0.02261 | 0.00065 | 0.00617 | 0.00022 | 413   | 94  | 155 | 6  | 144 | 4 | 124 | 4   | 0.93 |
| NY26-04 | 225  | 314 | 0.72 | 0.05248 | 0.00204 | 0.16176 | 0.00633 | 0.02251 | 0.00027 | 0.00640 | 0.00023 | 306   | 87  | 152 | 6  | 143 | 2 | 129 | 5   | 0.94 |
| NY26-05 | 251  | 263 | 0.95 | 0.04912 | 0.00221 | 0.14973 | 0.00660 | 0.02231 | 0.00024 | 0.00616 | 0.00024 | 154   | 99  | 142 | 6  | 142 | 1 | 124 | 5   | 1.00 |
| NY26-07 | 609  | 768 | 0.79 | 0.04842 | 0.00226 | 0.15294 | 0.00860 | 0.02258 | 0.00037 | 0.00677 | 0.00027 | 120   | 114 | 145 | 8  | 144 | 2 | 136 | 5   | 0.99 |
| NY26-09 | 259  | 323 | 0.8  | 0.04759 | 0.00201 | 0.14664 | 0.00603 | 0.02251 | 0.00025 | 0.00645 | 0.00024 | 80    | 96  | 139 | 5  | 144 | 2 | 130 | 5   | 1.04 |
| NY26-11 | 214  | 248 | 0.86 | 0.04887 | 0.00229 | 0.14919 | 0.00681 | 0.02242 | 0.00029 | 0.00651 | 0.00026 | 143   | 114 | 141 | 6  | 143 | 2 | 131 | 5   | 1.01 |
| NY26-13 | 447  | 561 | 0.8  | 0.05082 | 0.00187 | 0.15871 | 0.00582 | 0.02273 | 0.00025 | 0.00628 | 0.00022 | 232   | 88  | 150 | 5  | 145 | 2 | 127 | 4   | 0.97 |
| NY26-14 | 232  | 266 | 0.87 | 0.05076 | 0.00237 | 0.15466 | 0.00733 | 0.02212 | 0.00027 | 0.00593 | 0.00022 | 232   | 114 | 146 | 6  | 141 | 2 | 120 | 4   | 0.97 |
| NY26-15 | 212  | 285 | 0.74 | 0.05321 | 0.00216 | 0.16448 | 0.00648 | 0.02253 | 0.00026 | 0.00595 | 0.00024 | 339   | 93  | 155 | 6  | 144 | 2 | 120 | 5   | 0.93 |
| NY26-16 | 211  | 245 | 0.86 | 0.04802 | 0.00302 | 0.14816 | 0.00918 | 0.02256 | 0.00043 | 0.00580 | 0.00027 | 98    | 144 | 140 | 8  | 144 | 3 | 117 | 5   | 1.03 |
| NY26-17 | 127  | 154 | 0.83 | 0.05321 | 0.00404 | 0.16088 | 0.01160 | 0.02233 | 0.00043 | 0.00588 | 0.00030 | 339   | 168 | 151 | 10 | 142 | 3 | 119 | 6   | 0.94 |
| NY26-18 | 812  | 505 | 1.61 | 0.05610 | 0.00473 | 0.17030 | 0.01369 | 0.02236 | 0.00046 | 0.00579 | 0.00028 | 457   | 189 | 160 | 12 | 143 | 3 | 117 | 6   | 0.89 |
| NY26-19 | 161  | 166 | 0.97 | 0.05636 | 0.00408 | 0.16930 | 0.01137 | 0.02229 | 0.00052 | 0.00625 | 0.00038 | 465   | 161 | 159 | 10 | 142 | 3 | 126 | 8   | 0.89 |
| NY26-20 | 147  | 200 | 0.73 | 0.05371 | 0.00545 | 0.16347 | 0.01524 | 0.02274 | 0.00049 | 0.00602 | 0.00042 | 367   | 225 | 154 | 13 | 145 | 3 | 121 | 8   | 0.94 |
| NY27-01 | 174  | 241 | 0.72 | 0.05522 | 0.00268 | 0.16646 | 0.00765 | 0.02260 | 0.00035 | 0.00631 | 0.00025 | 420   | 107 | 156 | 7  | 144 | 2 | 127 | 5   | 0.92 |
| NY27-02 | 112  | 165 | 0.68 | 0.05651 | 0.00343 | 0.16599 | 0.00946 | 0.02188 | 0.00030 | 0.00601 | 0.00029 | 472   | 140 | 156 | 8  | 140 | 2 | 121 | 6   | 0.90 |
| NY27-03 | 85   | 42  | 2.01 | 0.06336 | 0.00314 | 0.74604 | 0.03670 | 0.08656 | 0.00137 | 0.02353 | 0.00109 | 720   | 404 | 566 | 24 | 535 | 8 | 470 | 22  | 0.95 |
| NY27-04 | 229  | 302 | 0.76 | 0.04957 | 0.00201 | 0.15071 | 0.00642 | 0.02198 | 0.00028 | 0.00599 | 0.00031 | 176   | 129 | 143 | 6  | 140 | 2 | 121 | 6   | 0.98 |
| NY27-05 | 425  | 676 | 0.63 | 0.04657 | 0.00145 | 0.14232 | 0.00455 | 0.02211 | 0.00021 | 0.00622 | 0.00035 | 33    | 65  | 135 | 4  | 141 | 1 | 125 | 7   | 1.04 |
| NY27-06 | 246  | 328 | 0.75 | 0.04875 | 0.00201 | 0.14728 | 0.00622 | 0.02196 | 0.00026 | 0.00576 | 0.00035 | 200   | 96  | 140 | 6  | 140 | 2 | 116 | 7   | 1.00 |
| NY27-08 | 144  | 195 | 0.74 | 0.05734 | 0.00347 | 0.17074 | 0.00993 | 0.02230 | 0.00046 | 0.00568 | 0.00035 | 506   | 133 | 160 | 9  | 142 | 3 | 115 | 7   | 0.89 |
| NY27-09 | 219  | 312 | 0.7  | 0.04787 | 0.00235 | 0.14776 | 0.00715 | 0.02274 | 0.00053 | 0.00602 | 0.00027 | 100   | 106 | 140 | 6  | 145 | 3 | 121 | 5   | 1.04 |
| NY27-10 | 231  | 327 | 0.71 | 0.05216 | 0.00200 | 0.15908 | 0.00597 | 0.02230 | 0.00023 | 0.00573 | 0.00022 | 300   | 89  | 150 | 5  | 142 | 1 | 116 | 4   | 0.95 |
| NY27-11 | 240  | 322 | 0.75 | 0.04827 | 0.00190 | 0.14864 | 0.00573 | 0.02255 | 0.00024 | 0.00554 | 0.00045 | 122   | 97  | 141 | 5  | 144 | 2 | 112 | 9   | 1.02 |
| NY27-12 | 227  | 246 | 0.92 | 0.05223 | 0.00248 | 0.15818 | 0.00707 | 0.02213 | 0.00024 | 0.00538 | 0.00057 | 295   | 142 | 149 | 6  | 141 | 1 | 108 | 12  | 0.95 |
| NY27-13 | 215  | 288 | 0.75 | 0.05205 | 0.00199 | 0.15623 | 0.00580 | 0.02210 | 0.00028 | 0.00513 | 0.00068 | 287   | 87  | 147 | 5  | 141 | 2 | 103 | 14  | 0.96 |
| NY27-14 | 197  | 263 | 0.75 | 0.05130 | 0.00266 | 0.15407 | 0.00802 | 0.02201 | 0.00028 | 0.00549 | 0.00090 | 254   | 119 | 146 | 7  | 140 | 2 | 111 | 18  | 0.96 |
| NY27-15 | 257  | 199 | 1.3  | 0.05387 | 0.00627 | 0.16557 | 0.01996 | 0.02242 | 0.00063 | 0.00794 | 0.00269 | 365   | 265 | 156 | 17 | 143 | 4 | 160 | 54  | 0.92 |
| NY27-16 | 151  | 202 | 0.75 | 0.05052 | 0.00213 | 0.15435 | 0.00665 | 0.02210 | 0.00025 | 0.00506 | 0.00097 | 220   | 103 | 146 | 6  | 141 | 2 | 102 | 20  | 0.97 |
| NY27-18 | 101  | 169 | 0.6  | 0.05518 | 0.00319 | 0.16978 | 0.00991 | 0.02267 | 0.00033 | 0.00532 | 0.00075 | 420   | 130 | 159 | 9  | 144 | 2 | 107 | 15  | 0.91 |
| NY27-19 | 220  | 300 | 0.73 | 0.04952 | 0.00194 | 0.15089 | 0.00566 | 0.02236 | 0.00025 | 0.00512 | 0.00058 | 172   | 91  | 143 | 5  | 143 | 2 | 103 | 12  | 1.00 |
| NY27-20 | 196  | 275 | 0.71 | 0.05311 | 0.00235 | 0.16072 | 0.00716 | 0.02204 | 0.00029 | 0.00532 | 0.00049 | 345   | 100 | 151 | 6  | 141 | 2 | 107 | 10  | 0.93 |
| NY28-01 | 327  | 226 | 1.45 | 0.04693 | 0.00354 | 0.14428 | 0.01087 | 0.02229 | 0.00042 | 0.00444 | 0.00044 | 46    | 168 | 137 | 10 | 142 | 3 | 90  | 9   | 1.04 |
| NY28-02 | 1059 | 501 | 2.11 | 0.05050 | 0.00429 | 0.15360 | 0.01279 | 0.02206 | 0.00061 | 0.00168 | 0.00023 | 218   | 194 | 145 | 11 | 141 | 4 | 34  | 5   | 0.97 |
| NY28-03 | 444  | 225 | 1.98 | 0.04891 | 0.00379 | 0.14890 | 0.01150 | 0.02207 | 0.00043 | 0.00491 | 0.00060 | 144   | 175 | 141 | 10 | 141 | 3 | 99  | 12  | 1.00 |
| NY28-04 | 884  | 372 | 2.38 | 0.05183 | 0.00247 | 0.15768 | 0.00759 | 0.02206 | 0.00039 | 0.00430 | 0.00050 | 278   | 112 | 149 | 7  | 141 | 2 | 87  | 10  | 0.95 |
| NY28-05 | 715  | 502 | 1.42 | 0.04723 | 0.00211 | 0.14673 | 0.00661 | 0.02252 | 0.00039 | 0.00562 | 0.00087 | 61    | 98  | 139 | 6  | 144 | 2 | 113 | 17  | 1.04 |
| NY28-06 | 595  | 359 | 1.66 | 0.04745 | 0.00257 | 0.14573 | 0.00791 | 0.02227 | 0.00040 | 0.00555 | 0.00089 | 72    | 120 | 138 | 7  | 142 | 3 | 112 | 18  | 1.03 |
| NY28-07 | 807  | 436 | 1.85 | 0.04904 | 0.00505 | 0.15416 | 0.01557 | 0.02280 | 0.00069 | 0.00259 | 0.00063 |       |     |     |    |     |   |     |     |      |



|             |      |      |      |         |         |         |         |         |         |         |         |     |     |     |    |     |   |     |     |      |
|-------------|------|------|------|---------|---------|---------|---------|---------|---------|---------|---------|-----|-----|-----|----|-----|---|-----|-----|------|
| SMS12-06    | 478  | 445  | 1.07 | 0.05505 | 0.00147 | 0.51786 | 0.01450 | 0.06822 | 0.00111 | 0.02302 | 0.00692 | 414 | 61  | 424 | 10 | 425 | 7 | 460 | 137 | 1.00 |
| SMS12-07    | 566  | 181  | 3.12 | 0.04780 | 0.00651 | 0.11430 | 0.01550 | 0.01730 | 0.00040 | 0.00560 | 0.00180 | 91  | 272 | 110 | 14 | 111 | 3 | 113 | 37  | 1.01 |
| SMS12-08    | 549  | 248  | 2.22 | 0.04740 | 0.00503 | 0.11560 | 0.01220 | 0.01770 | 0.00040 | 0.00550 | 0.00190 | 68  | 223 | 111 | 11 | 113 | 2 | 112 | 37  | 1.02 |
| SMS12-09    | 530  | 221  | 2.4  | 0.04670 | 0.00519 | 0.11170 | 0.01220 | 0.01730 | 0.00050 | 0.00460 | 0.00180 | 36  | 226 | 107 | 11 | 111 | 3 | 93  | 36  | 1.04 |
| SMS12-10    | 997  | 322  | 3.09 | 0.04950 | 0.00406 | 0.11700 | 0.00960 | 0.01720 | 0.00040 | 0.00540 | 0.00190 | 169 | 187 | 112 | 9  | 110 | 2 | 108 | 38  | 0.98 |
| SMS12-11    | 590  | 275  | 2.15 | 0.04700 | 0.00420 | 0.11450 | 0.01020 | 0.01770 | 0.00040 | 0.00640 | 0.00170 | 51  | 198 | 110 | 9  | 113 | 2 | 128 | 33  | 1.03 |
| SMS12-12    | 425  | 235  | 1.81 | 0.04730 | 0.00499 | 0.11510 | 0.01210 | 0.01760 | 0.00040 | 0.00600 | 0.00160 | 66  | 224 | 111 | 11 | 113 | 2 | 121 | 33  | 1.02 |
| SMS12-13    | 512  | 255  | 2    | 0.05090 | 0.00569 | 0.12320 | 0.01370 | 0.01760 | 0.00040 | 0.00650 | 0.00210 | 235 | 252 | 118 | 12 | 112 | 3 | 131 | 43  | 0.95 |
| SMS12-14    | 388  | 253  | 1.53 | 0.04640 | 0.00513 | 0.11110 | 0.01220 | 0.01740 | 0.00040 | 0.00670 | 0.00190 | 18  | 223 | 107 | 11 | 111 | 2 | 135 | 39  | 1.04 |
| SMS12-15    | 344  | 188  | 1.83 | 0.05210 | 0.00909 | 0.12320 | 0.02120 | 0.01710 | 0.00060 | 0.00540 | 0.00180 | 291 | 355 | 118 | 19 | 110 | 4 | 108 | 37  | 0.93 |
| SMS12-16    | 732  | 445  | 1.64 | 0.04760 | 0.00389 | 0.11580 | 0.00940 | 0.01760 | 0.00040 | 0.00730 | 0.00260 | 80  | 183 | 111 | 9  | 113 | 3 | 147 | 53  | 1.02 |
| SMS12-17    | 504  | 229  | 2.2  | 0.05000 | 0.00803 | 0.12120 | 0.01910 | 0.01760 | 0.00060 | 0.00630 | 0.00350 | 197 | 322 | 116 | 17 | 112 | 4 | 127 | 69  | 0.97 |
| SMS12-18    | 369  | 250  | 1.47 | 0.04720 | 0.00498 | 0.11580 | 0.01220 | 0.01780 | 0.00040 | 0.00660 | 0.00240 | 58  | 222 | 111 | 11 | 114 | 2 | 134 | 49  | 1.03 |
| SMS12-19    | 826  | 350  | 2.36 | 0.04710 | 0.00411 | 0.10980 | 0.00950 | 0.01690 | 0.00040 | 0.00620 | 0.00230 | 54  | 193 | 106 | 9  | 108 | 2 | 126 | 45  | 1.02 |
| SMS12-20    | 453  | 257  | 1.77 | 0.05080 | 0.00559 | 0.11920 | 0.01300 | 0.01700 | 0.00040 | 0.00530 | 0.00190 | 230 | 248 | 114 | 12 | 109 | 3 | 107 | 38  | 0.96 |
| SMS14-01    | 1039 | 266  | 3.9  | 0.04700 | 0.00780 | 0.09570 | 0.01570 | 0.01480 | 0.00050 | 0.00280 | 0.00050 | 51  | 302 | 93  | 15 | 94  | 3 | 57  | 10  | 1.01 |
| SMS14-02    | 551  | 131  | 4.21 | 0.04740 | 0.01097 | 0.09390 | 0.02160 | 0.01440 | 0.00050 | 0.00520 | 0.00150 | 70  | 392 | 91  | 20 | 92  | 3 | 104 | 30  | 1.01 |
| SMS14-03    | 293  | 149  | 1.97 | 0.04950 | 0.01593 | 0.09870 | 0.03140 | 0.01450 | 0.00070 | 0.00440 | 0.00130 | 173 | 550 | 96  | 29 | 92  | 4 | 89  | 27  | 0.96 |
| SMS14-04    | 930  | 415  | 2.24 | 0.05010 | 0.00538 | 0.09770 | 0.01040 | 0.01420 | 0.00040 | 0.00620 | 0.00360 | 199 | 241 | 95  | 10 | 91  | 2 | 125 | 72  | 0.96 |
| SMS14-05    | 716  | 211  | 3.4  | 0.04630 | 0.01839 | 0.09220 | 0.03630 | 0.01450 | 0.00090 | 0.00130 | 0.00030 | 12  | 654 | 90  | 34 | 92  | 6 | 27  | 6   | 1.02 |
| SMS14-06    | 1969 | 619  | 3.18 | 0.04570 | 0.00273 | 0.09340 | 0.00560 | 0.01480 | 0.00030 | 0.00540 | 0.00160 | -20 | 130 | 91  | 5  | 95  | 2 | 109 | 32  | 1.04 |
| SMS14-07    | 3519 | 745  | 4.73 | 0.04520 | 0.00339 | 0.08960 | 0.00670 | 0.01440 | 0.00030 | 0.00320 | 0.00070 | -8  | 164 | 87  | 6  | 92  | 2 | 64  | 15  | 1.06 |
| SMS14-08    | 500  | 210  | 2.38 | 0.04650 | 0.00939 | 0.09430 | 0.01880 | 0.01470 | 0.00050 | 0.00400 | 0.00140 | 26  | 346 | 92  | 17 | 94  | 3 | 81  | 27  | 1.02 |
| SMS14-09    | 651  | 228  | 2.85 | 0.05040 | 0.00941 | 0.10190 | 0.01880 | 0.01470 | 0.00050 | 0.00130 | 0.00020 | 214 | 349 | 99  | 17 | 94  | 3 | 25  | 4   | 0.95 |
| SMS14-10    | 1311 | 519  | 2.53 | 0.04690 | 0.00638 | 0.08980 | 0.01200 | 0.01390 | 0.00040 | 0.00180 | 0.00040 | 42  | 259 | 87  | 11 | 89  | 3 | 36  | 9   | 1.02 |
| SMS14-11    | 469  | 132  | 3.56 | 0.04770 | 0.01127 | 0.09460 | 0.02220 | 0.01440 | 0.00050 | 0.00550 | 0.00260 | 83  | 401 | 92  | 21 | 92  | 3 | 111 | 51  | 1.00 |
| SMS14-12    | 433  | 160  | 2.7  | 0.05020 | 0.00896 | 0.09990 | 0.01770 | 0.01440 | 0.00040 | 0.00630 | 0.00330 | 206 | 338 | 97  | 16 | 92  | 2 | 127 | 66  | 0.95 |
| SMS14-13    | 1028 | 262  | 3.93 | 0.04620 | 0.00364 | 0.09350 | 0.00730 | 0.01470 | 0.00030 | 0.00430 | 0.00120 | 8   | 176 | 91  | 7  | 94  | 2 | 87  | 25  | 1.03 |
| 08JH427 01  | 1633 | 2337 | 0.70 |         |         | 0.1613  | 0.0041  | 0.0214  | 0.0003  |         |         |     |     |     |    |     |   | 137 | 2   |      |
| 08JH427 02  | 808  | 1614 | 0.50 |         |         | 0.1496  | 0.0028  | 0.0215  | 0.0003  |         |         |     |     |     |    |     |   | 137 | 2   |      |
| 08JH427 03  | 1047 | 1165 | 0.90 |         |         | 0.1681  | 0.0101  | 0.0215  | 0.0007  |         |         |     |     |     |    |     |   | 137 | 4   |      |
| 08JH427 04  | 385  | 732  | 0.53 |         |         | 0.1477  | 0.0148  | 0.0205  | 0.0006  |         |         |     |     |     |    |     |   | 131 | 3   |      |
| 08JH427 05  | 553  | 924  | 0.60 |         |         | 0.1528  | 0.0053  | 0.0217  | 0.0004  |         |         |     |     |     |    |     |   | 138 | 3   |      |
| 08JH427 06  | 355  | 509  | 0.70 |         |         | 0.1466  | 0.0155  | 0.0205  | 0.0006  |         |         |     |     |     |    |     |   | 131 | 4   |      |
| 08JH427 07  | 1231 | 1574 | 0.78 |         |         | 0.1584  | 0.0035  | 0.0216  | 0.0003  |         |         |     |     |     |    |     |   | 138 | 2   |      |
| 08JH427 08  | 657  | 1019 | 0.64 |         |         | 0.1683  | 0.0126  | 0.0205  | 0.0005  |         |         |     |     |     |    |     |   | 131 | 3   |      |
| 08JH427 09  | 383  | 575  | 0.67 |         |         | 0.1570  | 0.0081  | 0.0211  | 0.0006  |         |         |     |     |     |    |     |   | 135 | 3   |      |
| 08JH427 10  | 409  | 703  | 0.58 |         |         | 0.1558  | 0.0065  | 0.0215  | 0.0005  |         |         |     |     |     |    |     |   | 137 | 3   |      |
| 08JH427 11  | 828  | 1147 | 0.72 |         |         | 0.1862  | 0.0055  | 0.0263  | 0.0004  |         |         |     |     |     |    |     |   | 167 | 3   |      |
| 08JH427 12  | 685  | 961  | 0.71 |         |         | 0.1848  | 0.0055  | 0.0210  | 0.0004  |         |         |     |     |     |    |     |   | 134 | 2   |      |
| 08JH427 13  | 491  | 570  | 0.86 |         |         | 0.1905  | 0.0196  | 0.0202  | 0.0006  |         |         |     |     |     |    |     |   | 129 | 4   |      |
| 08JH427 14  | 1007 | 856  | 1.18 |         |         | 0.1915  | 0.0083  | 0.0210  | 0.0005  |         |         |     |     |     |    |     |   | 134 | 3   |      |
| 08JH427 15  | 524  | 697  | 0.75 |         |         | 0.2083  | 0.0111  | 0.0210  | 0.0007  |         |         |     |     |     |    |     |   | 134 | 4   |      |
| 08JH427 16  | 352  | 638  | 0.55 |         |         | 0.1472  | 0.0054  | 0.0216  | 0.0004  |         |         |     |     |     |    |     |   | 138 | 3   |      |
| 08JH427 17  | 862  | 966  | 0.89 |         |         | 0.1946  | 0.0167  | 0.0210  | 0.0005  |         |         |     |     |     |    |     |   | 134 | 3   |      |
| 08JH427 18  | 1015 | 1845 | 0.55 |         |         | 0.1563  | 0.0082  | 0.0207  | 0.0003  |         |         |     |     |     |    |     |   | 132 | 2   |      |
| 08JH427 19  | 994  | 1542 | 0.64 |         |         | 0.1533  | 0.0031  | 0.0212  | 0.0003  |         |         |     |     |     |    |     |   | 135 | 2   |      |
| 08JH427 20  | 282  | 397  | 0.71 |         |         | 0.1490  | 0.0046  | 0.0212  | 0.0004  |         |         |     |     |     |    |     |   | 135 | 2   |      |
| 08JH427 21  | 948  | 1734 | 0.55 |         |         | 0.1627  | 0.0039  | 0.0217  | 0.0003  |         |         |     |     |     |    |     |   | 138 | 2   |      |
| 08JH427 22  | 706  | 760  | 0.93 |         |         | 0.1811  | 0.0037  | 0.0261  | 0.0003  |         |         |     |     |     |    |     |   | 166 | 2   |      |
| 08JH427 23  | 806  | 1129 | 0.71 |         |         | 0.1793  | 0.0113  | 0.0212  | 0.0004  |         |         |     |     |     |    |     |   | 135 | 3   |      |
| 08JH427 24  | 662  | 587  | 1.13 |         |         | 0.2083  | 0.0104  | 0.0213  | 0.0006  |         |         |     |     |     |    |     |   | 136 | 4   |      |
| 08JH 430 01 | 89   | 108  | 0.82 |         |         | 0.1064  | 0.0065  | 0.0149  | 0.0005  |         |         |     |     |     |    |     |   | 95  | 3   |      |
| 08JH 430 02 | 76   | 131  | 0.58 |         |         | 0.0975  | 0.0055  | 0.0145  | 0.0004  |         |         |     |     |     |    |     |   | 93  | 3   |      |
| 08JH 430 03 | 104  | 174  | 0.60 |         |         | 0.0999  | 0.0052  | 0.0151  | 0.0004  |         |         |     |     |     |    |     |   | 97  | 3   |      |
| 08JH 430 04 | 97   | 171  | 0.57 |         |         | 0.1016  | 0.0038  | 0.0144  | 0.0003  |         |         |     |     |     |    |     |   | 92  | 2   |      |
| 08JH 430 05 | 90   | 79   | 1.14 |         |         | 0.1134  | 0.0098  | 0.0152  | 0.0006  |         |         |     |     |     |    |     |   | 97  | 4   |      |
| 08JH 430 06 | 164  | 148  | 1.11 |         |         | 0.0993  | 0.0071  | 0.0149  | 0.0005  |         |         |     |     |     |    |     |   | 95  | 3   |      |
| 08JH 430 07 | 79   | 95   | 0.83 |         |         | 0.1068  | 0.0067  | 0.0148  | 0.0005  |         |         |     |     |     |    |     |   | 95  | 3   |      |
| 08JH 430 08 | 103  | 143  | 0.72 |         |         | 0.1075  | 0.0043  | 0.0146  | 0.0004  |         |         |     |     |     |    |     |   | 93  | 2   |      |
| 08JH 430 09 | 101  | 129  | 0.78 |         |         | 0.1024  | 0.0061  | 0.0148  | 0.0004  |         |         |     |     |     |    |     |   | 94  | 3   |      |
| 08JH 430 10 | 124  | 155  | 0.80 |         |         | 0.1068  | 0.0101  | 0.0149  | 0.0007  |         |         |     |     |     |    |     |   | 95  | 4   |      |
| 08JH 430 11 | 108  | 95   | 1.13 |         |         | 0.1000  | 0.0066  | 0.0150  | 0.0004  |         |         |     |     |     |    |     |   | 96  | 3   |      |
| 08JH 430 12 | 23   | 33   | 0.70 |         |         | 0.1022  | 0.0291  | 0.0149  | 0.0016  |         |         |     |     |     |    |     |   | 95  | 10  |      |
| 08JH 430 13 | 83   | 107  | 0.78 |         |         | 0.1104  | 0.0056  | 0.0152  | 0.0004  |         |         |     |     |     |    |     |   | 97  | 3   |      |
| 08JH 430 14 | 75   | 96   | 0.77 |         |         | 0.1130  | 0.0188  | 0.0152  | 0.0012  |         |         |     |     |     |    |     |   | 98  | 7   |      |
| 08JH 430 15 | 161  | 260  | 0.62 |         |         | 0.1008  | 0.0040  | 0.0153  | 0.0004  |         |         |     |     |     |    |     |   | 98  | 2   |      |
| 08JH 430 16 | 112  | 123  | 0.91 |         |         | 0.1122  | 0.0100  | 0.0156  | 0.0007  |         |         |     |     |     |    |     |   | 100 | 4   |      |
| 08JH 430 17 | 152  | 214  | 0.71 |         |         | 0.1042  | 0.0042  | 0.0154  | 0.0004  |         |         |     |     |     |    |     |   | 99  | 2   |      |
| 08JH 430 18 | 81   | 131  | 0.62 |         |         | 0.0997  | 0.0052  | 0.0151  | 0.0004  |         |         |     |     |     |    |     |   | 96  | 3   |      |
| 08JH 430 19 | 76   | 65   | 1.17 |         |         | 0.1114  | 0.0134  | 0.0160  | 0.0008  |         |         |     |     |     |    |     |   | 102 | 5   |      |
| 08JH 430 20 | 54   | 49   | 1.04 |         |         | 0.0930  | 0.0115  | 0.0146  | 0.0015  |         |         |     |     |     |    |     |   | 94  | 9   |      |
| 08JH 430 21 | 90   | 135  | 0.66 |         |         | 0.1073  | 0.0119  | 0.0143  | 0.0007  |         |         |     |     |     |    |     |   | 91  | 5   |      |
| 08JH 430 22 | 120  | 160  | 0.75 |         |         |         |         |         |         |         |         |     |     |     |    |     |   |     |     |      |

|             |     |     |      |       |      |       |      |    |     |
|-------------|-----|-----|------|-------|------|-------|------|----|-----|
| 09GF-31A 06 | 172 | 211 | 0.82 | 0.097 | 4.33 | 0.015 | 1.60 | 97 | 1.5 |
| 09GF-31A 07 | 199 | 261 | 0.76 | 0.099 | 4.04 | 0.015 | 1.58 | 95 | 1.5 |
| 09GF-31A 08 | 157 | 177 | 0.89 | 0.102 | 4.14 | 0.015 | 1.65 | 94 | 1.5 |
| 09GF-31A 09 | 168 | 220 | 0.76 | 0.095 | 3.97 | 0.015 | 1.74 | 96 | 1.7 |
| 09GF-31A 10 | 232 | 343 | 0.68 | 0.102 | 3.47 | 0.015 | 1.54 | 95 | 1.4 |
| 09GF-31A 11 | 238 | 334 | 0.71 | 0.098 | 3.28 | 0.015 | 1.68 | 95 | 1.6 |
| 09GF-31A 12 | 160 | 166 | 0.96 | 0.099 | 4.86 | 0.015 | 1.62 | 94 | 1.5 |
| 09GF-31A 13 | 238 | 337 | 0.71 | 0.101 | 3.21 | 0.015 | 1.55 | 94 | 1.4 |
| 09GF-31A 14 | 237 | 334 | 0.71 | 0.094 | 3.27 | 0.015 | 1.53 | 96 | 1.5 |
| 09GF-31A 15 | 172 | 222 | 0.78 | 0.091 | 6.77 | 0.015 | 1.63 | 95 | 1.5 |
| 09GF-31A 16 | 188 | 225 | 0.84 | 0.101 | 3.67 | 0.015 | 1.52 | 97 | 1.5 |

|            |     |     |      |        |        |        |        |     |    |
|------------|-----|-----|------|--------|--------|--------|--------|-----|----|
| 09GF-38 01 | 91  | 153 | 0.59 | 0.1017 | 0.0050 | 0.0149 | 0.0004 | 95  | 2  |
| 09GF-38 02 | 93  | 147 | 0.64 | 0.1021 | 0.0045 | 0.0153 | 0.0003 | 98  | 2  |
| 09GF-38 03 | 111 | 186 | 0.59 | 0.0984 | 0.0042 | 0.0152 | 0.0003 | 97  | 2  |
| 09GF-38 04 | 46  | 21  | 0.78 | 0.1104 | 0.0216 | 0.0166 | 0.0013 | 106 | 8  |
| 09GF-38 05 | 125 | 279 | 0.45 | 0.1027 | 0.0034 | 0.0150 | 0.0003 | 96  | 2  |
| 09GF-38 06 | 73  | 98  | 0.75 | 0.1019 | 0.0080 | 0.0154 | 0.0005 | 99  | 3  |
| 09GF-38 07 | 45  | 39  | 1.16 | 0.0991 | 0.0115 | 0.0152 | 0.0007 | 97  | 4  |
| 09GF-38 08 | 48  | 73  | 0.66 | 0.1014 | 0.0076 | 0.0151 | 0.0005 | 96  | 3  |
| 09GF-38 09 | 47  | 48  | 0.98 | 0.1062 | 0.0254 | 0.0150 | 0.0016 | 96  | 10 |
| 09GF-38 10 | 64  | 105 | 0.61 | 0.0978 | 0.0058 | 0.0153 | 0.0004 | 98  | 3  |
| 09GF-38 11 | 47  | 76  | 0.62 | 0.0991 | 0.0057 | 0.0150 | 0.0004 | 96  | 3  |
| 09GF-38 12 | 22  | 33  | 0.68 | 0.1047 | 0.0115 | 0.0155 | 0.0008 | 99  | 5  |
| 09GF-38 13 | 59  | 98  | 0.61 | 0.1208 | 0.0072 | 0.0150 | 0.0004 | 96  | 3  |
| 09GF-38 14 | 215 | 307 | 0.70 | 0.1052 | 0.0110 | 0.0138 | 0.0004 | 88  | 2  |
| 09GF-38 15 | 83  | 131 | 0.63 | 0.1371 | 0.0064 | 0.0163 | 0.0004 | 104 | 3  |
| 09GF-38 16 | 80  | 92  | 0.87 | 0.1017 | 0.0058 | 0.0154 | 0.0004 | 98  | 3  |
| 09GF-38 17 | 77  | 107 | 0.72 | 0.1130 | 0.0134 | 0.0170 | 0.0009 | 109 | 5  |
| 09GF-38 18 | 65  | 94  | 0.69 | 0.1045 | 0.0058 | 0.0150 | 0.0004 | 96  | 2  |
| 09GF-38 19 | 68  | 92  | 0.73 | 0.1019 | 0.0067 | 0.0149 | 0.0004 | 95  | 3  |
| 09GF-38 20 | 61  | 110 | 0.55 | 0.0996 | 0.0074 | 0.0155 | 0.0005 | 99  | 3  |
| 09GF-38 21 | 80  | 127 | 0.63 | 0.1029 | 0.0086 | 0.0157 | 0.0006 | 101 | 3  |
| 09GF-38 22 | 107 | 114 | 0.94 | 0.1038 | 0.0072 | 0.0152 | 0.0005 | 97  | 3  |
| 09GF-38 23 | 61  | 75  | 0.82 | 0.1031 | 0.0070 | 0.0153 | 0.0004 | 98  | 3  |
| 09GF-38 24 | 62  | 108 | 0.58 | 0.1015 | 0.0057 | 0.0151 | 0.0004 | 96  | 2  |

|            |     |     |      |        |        |        |        |     |   |
|------------|-----|-----|------|--------|--------|--------|--------|-----|---|
| 09GF-42 01 | 85  | 75  | 1.12 | 0.1043 | 0.0068 | 0.0156 | 0.0004 | 100 | 3 |
| 09GF-42 02 | 57  | 59  | 0.96 | 0.0940 | 0.0063 | 0.0148 | 0.0006 | 95  | 4 |
| 09GF-42 03 | 77  | 95  | 0.81 | 0.1178 | 0.0065 | 0.0153 | 0.0004 | 98  | 3 |
| 09GF-42 04 | 68  | 102 | 0.67 | 0.1017 | 0.0060 | 0.0151 | 0.0004 | 97  | 3 |
| 09GF-42 05 | 94  | 155 | 0.61 | 0.1025 | 0.0049 | 0.0152 | 0.0003 | 97  | 2 |
| 09GF-42 06 | 120 | 109 | 1.10 | 0.1198 | 0.0312 | 0.0145 | 0.0006 | 92  | 4 |
| 09GF-42 07 | 74  | 112 | 0.66 | 0.1014 | 0.0065 | 0.0155 | 0.0004 | 99  | 3 |
| 09GF-42 08 | 106 | 169 | 0.63 | 0.1068 | 0.0067 | 0.0157 | 0.0004 | 100 | 3 |
| 09GF-42 09 | 59  | 74  | 0.79 | 0.1110 | 0.0080 | 0.0155 | 0.0005 | 99  | 3 |
| 09GF-42 10 | 63  | 64  | 0.98 | 0.1002 | 0.0129 | 0.0150 | 0.0008 | 96  | 5 |
| 09GF-42 11 | 94  | 147 | 0.64 | 0.1098 | 0.0066 | 0.0154 | 0.0004 | 99  | 3 |
| 09GF-42 12 | 78  | 119 | 0.65 | 0.1057 | 0.0052 | 0.0153 | 0.0004 | 98  | 2 |
| 09GF-42 13 | 143 | 110 | 1.29 | 0.1071 | 0.0074 | 0.0154 | 0.0005 | 99  | 3 |
| 09GF-42 14 | 82  | 120 | 0.68 | 0.1079 | 0.0059 | 0.0153 | 0.0004 | 98  | 2 |
| 09GF-42 15 | 95  | 167 | 0.57 | 0.1010 | 0.0042 | 0.0152 | 0.0003 | 97  | 2 |
| 09GF-42 16 | 66  | 101 | 0.66 | 0.0985 | 0.0127 | 0.0139 | 0.0005 | 89  | 3 |
| 09GF-42 17 | 41  | 29  | 1.45 | 0.1105 | 0.0200 | 0.0146 | 0.0011 | 94  | 7 |
| 09GF-42 18 | 78  | 106 | 0.73 | 0.1083 | 0.0083 | 0.0145 | 0.0005 | 93  | 3 |
| 09GF-42 19 | 82  | 132 | 0.63 | 0.0909 | 0.0053 | 0.0151 | 0.0004 | 97  | 2 |
| 09GF-42 20 | 42  | 75  | 0.56 | 0.1181 | 0.0102 | 0.0155 | 0.0006 | 99  | 4 |
| 09GF-42 21 | 44  | 58  | 0.77 | 0.0747 | 0.0105 | 0.0131 | 0.0007 | 84  | 5 |
| 09GF-42 22 | 108 | 169 | 0.64 | 0.0979 | 0.0046 | 0.0150 | 0.0003 | 96  | 2 |
| 09GF-42 23 | 24  | 31  | 0.80 | 0.1019 | 0.0162 | 0.0129 | 0.0008 | 82  | 5 |
| 09GF-42 24 | 31  | 40  | 0.78 | 0.1164 | 0.0093 | 0.0146 | 0.0006 | 94  | 4 |

N18, Xianyou (Li et al., 2009; Guo et al., 2012; Liu et al., 2016)

|                |     |     |      |        |     |       |     |        |      |      |     |      |     |     |     |
|----------------|-----|-----|------|--------|-----|-------|-----|--------|------|------|-----|------|-----|-----|-----|
| T207-3706-1.1  | 457 | 375 | 1.22 | 0.0565 | 6.9 | 0.181 | 7.9 | 0.0233 | 4    | 471  | 150 | 148  | 5.8 | 160 | 7.7 |
| T207-3706-2.1  | 253 | 452 | 0.56 | 0.0571 | 4.1 | 0.179 | 5.9 | 0.0227 | 4.2  | 497  | 90  | 144  | 6   | 152 | 10  |
| T207-3706-3.1  | 142 | 156 | 0.91 | 0.0637 | 7.7 | 0.191 | 8.8 | 0.0217 | 4.2  | 731  | 160 | 139  | 5.8 | 157 | 9   |
| T207-3706-4.1  | 382 | 480 | 0.80 | 0.06   | 3.1 | 0.18  | 5   | 0.0218 | 4    | 605  | 68  | 139  | 5.4 | 145 | 6.5 |
| T207-3706-5.1  | 230 | 259 | 0.89 | 0.0581 | 7.9 | 0.192 | 8.9 | 0.0239 | 4.1  | 534  | 170 | 153  | 6.1 | 167 | 9.2 |
| T207-3706-6.1  | 350 | 342 | 1.02 | 0.0515 | 11  | 0.149 | 12  | 0.0211 | 4.1  | 263  | 260 | 134  | 5.4 | 139 | 8.3 |
| T207-3706-7.1  | 15  | 34  | 0.44 | 0.084  | 19  | 0.72  | 20  | 0.0621 | 4.7  | 1295 | 370 | 388  | 18  | 539 | 92  |
| T207-3706-8.1  | 2   | 2   | 1.00 | 0.077  | 23  | 477   | 100 | 2230   | 2000 | 1027 | 750 | 1027 | 750 |     |     |
| T207-3706-9.1  | 246 | 198 | 1.24 | 0.0693 | 13  | 0.254 | 14  | 0.0265 | 4.1  | 907  | 280 | 169  | 6.8 | 176 | 11  |
| T207-3706-10.1 | 716 | 318 | 2.25 | 0.0557 | 5.1 | 0.196 | 6.5 | 0.0255 | 4    | 440  | 110 | 163  | 6.5 | 164 | 8   |

|                |     |     |      |        |     |       |     |        |     |       |      |     |     |     |    |
|----------------|-----|-----|------|--------|-----|-------|-----|--------|-----|-------|------|-----|-----|-----|----|
| T207-3710-1.1  | 122 | 185 | 0.66 | 0.0541 | 13  | 0.156 | 14  | 0.0209 | 4.9 | 376   | 290  | 133 | 6.4 | 142 | 12 |
| T207-3710-2.1  | 86  | 83  | 1.04 | 0.048  | 87  | 0.13  | 88  | 0.0196 | 7   | 120   | 2100 | 125 | 8.7 | 125 | 39 |
| T207-3710-3.1  | 106 | 164 | 0.65 | 0.046  | 14  | 0.134 | 14  | 0.0211 | 4.1 | 20.5  | 330  | 135 | 5.5 | 128 | 10 |
| T207-3710-4.1  | 120 | 136 | 0.88 | 0.023  | 58  | 0.064 | 58  | 0.0203 | 4.4 | 22100 | 2200 | 130 | 5.7 | 100 | 16 |
| T207-3710-5.1  | 66  | 84  | 0.79 | 0.036  | 43  | 0.098 | 43  | 0.0197 | 5.2 | 2640  | 1200 | 126 | 6.5 | 115 | 20 |
| T207-3710-6.1  | 104 | 183 | 0.57 | 0.029  | 40  | 0.074 | 40  | 0.0187 | 5   | 21300 | 1300 | 120 | 6   | 94  | 19 |
| T207-3710-7.1  | 89  | 140 | 0.64 | 0.035  | 33  | 0.098 | 33  | 0.0204 | 4.5 | 2724  | 910  | 130 | 5.9 | 105 | 19 |
| T207-3710-8.1  | 102 | 180 | 0.57 | 0.0528 | 8.8 | 0.154 | 9.8 | 0.0211 | 4.2 | 321   | 200  | 135 | 5.5 | 147 | 11 |
| T207-3710-9.1  | 84  | 166 | 0.51 | 0.0527 | 14  | 0.15  | 14  | 0.0207 | 4.2 | 314   | 310  | 132 | 5.5 | 131 | 15 |
| T207-3710-10.1 | 106 | 166 | 0.64 | 0.023  | 53  | 0.06  | 53  | 0.0188 | 4.4 | 22040 | 2000 | 120 | 5.3 | 74  | 18 |
| T207-3710-11.1 | 54  | 120 | 0.45 | 0.0395 | 13  | 0.107 | 14  | 0.0197 | 4.9 | 2381  | 350  | 126 | 6.1 | 120 | 12 |

|                |      |      |      |        |     |        |        |        |        |       |      |     |     |     |     |
|----------------|------|------|------|--------|-----|--------|--------|--------|--------|-------|------|-----|-----|-----|-----|
| T207-3710-12.1 | 190  | 285  | 0.67 | 0.0457 | 8   | 0.132  | 9      | 0.0209 | 4.1    | 216   | 190  | 133 | 5.3 | 128 | 8.2 |
| T207-3710-13.1 | 72   | 100  | 0.72 | 0.024  | 82  | 0.066  | 82     | 0.0198 | 4.9    | 21880 | 3000 | 126 | 6.1 | 103 | 27  |
| T207-3710-14.1 | 909  | 415  | 2.19 | 0.0506 | 5.6 | 0.158  | 6.8    | 0.0226 | 4      | 224   | 130  | 144 | 5.7 | 131 | 5.8 |
| T207-3710-15.1 | 188  | 250  | 0.75 | 0.0489 | 8.1 | 0.141  | 9      | 0.0209 | 4      | 142   | 190  | 133 | 5.3 | 149 | 10  |
| 08JH396 01     | 94   | 139  | 0.68 |        |     | 0.1553 | 0.0098 | 0.0210 | 0.0006 |       |      | 134 | 4   |     |     |
| 08JH396 02     | 238  | 287  | 0.83 |        |     | 0.1478 | 0.0050 | 0.0209 | 0.0005 |       |      | 134 | 3   |     |     |
| 08JH396 03     | 386  | 568  | 0.68 |        |     | 0.1501 | 0.0027 | 0.0214 | 0.0004 |       |      | 136 | 2   |     |     |
| 08JH396 04     | 407  | 613  | 0.66 |        |     | 0.1523 | 0.0041 | 0.0211 | 0.0004 |       |      | 135 | 3   |     |     |
| 08JH396 05     | 379  | 479  | 0.79 |        |     | 0.1342 | 0.0125 | 0.0199 | 0.0005 |       |      | 127 | 3   |     |     |
| 08JH396 06     | 171  | 242  | 0.71 |        |     | 0.1460 | 0.0083 | 0.0209 | 0.0006 |       |      | 133 | 4   |     |     |
| 08JH396 07     | 1480 | 984  | 1.50 |        |     | 0.1546 | 0.0040 | 0.0207 | 0.0004 |       |      | 132 | 3   |     |     |
| 08JH396 08     | 222  | 354  | 0.63 |        |     | 0.1383 | 0.0051 | 0.0198 | 0.0004 |       |      | 127 | 3   |     |     |
| 08JH396 09     | 146  | 242  | 0.60 |        |     | 0.1354 | 0.0050 | 0.0200 | 0.0004 |       |      | 128 | 3   |     |     |
| 08JH396 10     | 190  | 225  | 0.84 |        |     | 0.1465 | 0.0053 | 0.0212 | 0.0005 |       |      | 135 | 3   |     |     |
| 08JH396 12     | 1653 | 1361 | 1.22 |        |     | 0.1431 | 0.0038 | 0.0210 | 0.0004 |       |      | 134 | 3   |     |     |
| 08JH396 13     | 439  | 537  | 0.82 |        |     | 0.1441 | 0.0032 | 0.0207 | 0.0004 |       |      | 132 | 2   |     |     |
| 08JH396 14     | 138  | 149  | 0.93 |        |     | 0.1382 | 0.0085 | 0.0205 | 0.0006 |       |      | 131 | 4   |     |     |
| 08JH396 16     | 172  | 207  | 0.83 |        |     | 0.1473 | 0.0058 | 0.0210 | 0.0005 |       |      | 134 | 3   |     |     |
| 08JH396 17     | 658  | 416  | 1.58 |        |     | 0.1457 | 0.0177 | 0.0205 | 0.0005 |       |      | 131 | 3   |     |     |
| 08JH396 18     | 289  | 307  | 0.94 |        |     | 0.1349 | 0.0056 | 0.0193 | 0.0005 |       |      | 123 | 3   |     |     |
| 08JH396 19     | 377  | 478  | 0.79 |        |     | 0.1518 | 0.0065 | 0.0201 | 0.0005 |       |      | 128 | 3   |     |     |
| 08JH396 20     | 206  | 362  | 0.57 |        |     | 0.1382 | 0.0119 | 0.0195 | 0.0005 |       |      | 125 | 3   |     |     |
| 08JH396 21     | 307  | 481  | 0.64 |        |     | 0.1505 | 0.0082 | 0.0206 | 0.0006 |       |      | 132 | 4   |     |     |
| 08JH396 22     | 261  | 352  | 0.74 |        |     | 0.1396 | 0.0059 | 0.0203 | 0.0005 |       |      | 129 | 3   |     |     |
| 08JH396 23     | 243  | 262  | 0.93 |        |     | 0.1362 | 0.0059 | 0.0204 | 0.0005 |       |      | 130 | 3   |     |     |
| 08JH396 24     | 123  | 174  | 0.71 |        |     | 0.1521 | 0.0064 | 0.0218 | 0.0005 |       |      | 139 | 3   |     |     |
| JH-400@1       | 345  | 488  | 0.71 |        |     | 0.139  | 2.12   | 0.021  | 1.51   |       |      | 132 | 2   |     |     |
| JH-400@2       | 350  | 213  | 1.64 |        |     | 0.135  | 2.57   | 0.021  | 1.52   |       |      | 132 | 2   |     |     |
| JH-400@3       | 592  | 1163 | 0.51 |        |     | 0.140  | 1.74   | 0.021  | 1.50   |       |      | 134 | 2   |     |     |
| JH-400@4       | 114  | 191  | 0.60 |        |     | 0.145  | 2.82   | 0.021  | 1.55   |       |      | 135 | 2   |     |     |
| JH-400@5       | 84   | 145  | 0.58 |        |     | 0.137  | 2.97   | 0.021  | 1.58   |       |      | 132 | 2   |     |     |
| JH-400@6       | 223  | 281  | 0.79 |        |     | 0.134  | 3.81   | 0.021  | 1.68   |       |      | 131 | 2   |     |     |
| JH-400@7       | 82   | 128  | 0.64 |        |     | 0.143  | 3.94   | 0.021  | 1.57   |       |      | 133 | 2   |     |     |
| JH-400@8       | 281  | 289  | 0.97 |        |     | 0.143  | 3.00   | 0.021  | 1.52   |       |      | 136 | 2   |     |     |
| JH-400@9       | 345  | 453  | 0.76 |        |     | 0.137  | 2.72   | 0.021  | 1.61   |       |      | 134 | 2   |     |     |
| JH-400@10      | 145  | 202  | 0.72 |        |     | 0.138  | 3.25   | 0.021  | 1.52   |       |      | 132 | 2   |     |     |
| JH-400@11      | 140  | 175  | 0.80 |        |     | 0.144  | 4.25   | 0.021  | 1.55   |       |      | 136 | 2   |     |     |
| JH-400@12      | 111  | 145  | 0.77 |        |     | 0.124  | 13.31  | 0.021  | 1.59   |       |      | 133 | 2   |     |     |
| JH-400@13      | 185  | 229  | 0.81 |        |     | 0.141  | 3.10   | 0.021  | 1.54   |       |      | 134 | 2   |     |     |
| JH-400@14      | 220  | 326  | 0.68 |        |     | 0.135  | 2.73   | 0.021  | 1.53   |       |      | 135 | 2   |     |     |
| JH-400@15      | 220  | 326  | 0.68 |        |     | 0.135  | 2.73   | 0.021  | 1.53   |       |      | 135 | 2   |     |     |
| JH-400@16      | 305  | 317  | 0.96 |        |     | 0.139  | 3.24   | 0.021  | 1.51   |       |      | 134 | 2   |     |     |
| JH-400@17      | 246  | 375  | 0.66 |        |     | 0.134  | 3.16   | 0.021  | 1.53   |       |      | 133 | 2   |     |     |
| JH-400@18      | 325  | 307  | 1.06 |        |     | 0.138  | 3.16   | 0.022  | 1.53   |       |      | 138 | 2   |     |     |
| 08JH408 01     | 118  | 266  | 0.44 |        |     | 0.1403 | 0.0047 | 0.0207 | 0.0005 |       |      | 132 | 3   |     |     |
| 08JH408 02     | 125  | 195  | 0.64 |        |     | 0.1241 | 0.0105 | 0.0195 | 0.0005 |       |      | 125 | 3   |     |     |
| 08JH408 03     | 59   | 89   | 0.66 |        |     | 0.1493 | 0.0135 | 0.0205 | 0.0008 |       |      | 131 | 5   |     |     |
| 08JH408 04     | 116  | 164  | 0.70 |        |     | 0.1430 | 0.0067 | 0.0211 | 0.0005 |       |      | 134 | 3   |     |     |
| 08JH408 05     | 149  | 241  | 0.62 |        |     | 0.1429 | 0.0061 | 0.0205 | 0.0005 |       |      | 130 | 3   |     |     |
| 08JH408 06     | 65   | 106  | 0.61 |        |     | 0.1443 | 0.0082 | 0.0207 | 0.0006 |       |      | 132 | 4   |     |     |
| 08JH408 07     | 134  | 243  | 0.55 |        |     | 0.1366 | 0.0079 | 0.0197 | 0.0006 |       |      | 126 | 4   |     |     |
| 08JH408 08     | 251  | 342  | 0.73 |        |     | 0.1389 | 0.0041 | 0.0204 | 0.0004 |       |      | 130 | 3   |     |     |
| 08JH408 09     | 218  | 367  | 0.59 |        |     | 0.1386 | 0.0058 | 0.0202 | 0.0005 |       |      | 129 | 3   |     |     |
| 08JH408 10     | 140  | 126  | 0.87 |        |     | 0.1529 | 0.0342 | 0.0203 | 0.0011 |       |      | 130 | 7   |     |     |
| 08JH408 11     | 110  | 161  | 0.69 |        |     | 0.1470 | 0.0144 | 0.0212 | 0.0010 |       |      | 135 | 6   |     |     |
| 08JH408 12     | 148  | 263  | 0.56 |        |     | 0.1380 | 0.0062 | 0.0204 | 0.0005 |       |      | 130 | 3   |     |     |
| 08JH408 13     | 225  | 214  | 1.05 |        |     | 0.1460 | 0.0091 | 0.0208 | 0.0007 |       |      | 133 | 4   |     |     |
| 08JH408 14     | 122  | 205  | 0.60 |        |     | 0.1359 | 0.0076 | 0.0206 | 0.0006 |       |      | 131 | 4   |     |     |
| 08JH408 15     | 385  | 367  | 1.05 |        |     | 0.1347 | 0.0055 | 0.0205 | 0.0005 |       |      | 131 | 3   |     |     |
| 08JH408 16     | 123  | 289  | 0.43 |        |     | 0.1425 | 0.0047 | 0.0209 | 0.0005 |       |      | 133 | 3   |     |     |
| 08JH408 17     | 236  | 355  | 0.66 |        |     | 0.1443 | 0.0035 | 0.0206 | 0.0004 |       |      | 132 | 3   |     |     |
| 08JH408 18     | 186  | 309  | 0.60 |        |     | 0.1533 | 0.0066 | 0.0212 | 0.0006 |       |      | 135 | 3   |     |     |
| 08JH408 19     | 199  | 333  | 0.60 |        |     | 0.1900 | 0.0195 | 0.0201 | 0.0007 |       |      | 128 | 4   |     |     |
| 08JH408 20     | 231  | 369  | 0.62 |        |     | 0.1411 | 0.0041 | 0.0210 | 0.0004 |       |      | 134 | 3   |     |     |
| 08JH408 21     | 218  | 323  | 0.67 |        |     | 0.1497 | 0.0054 | 0.0206 | 0.0005 |       |      | 131 | 3   |     |     |
| 08JH408 22     | 288  | 312  | 0.92 |        |     | 0.1942 | 0.0083 | 0.0197 | 0.0006 |       |      | 126 | 4   |     |     |
| 08JH408 23     | 172  | 238  | 0.72 |        |     | 0.1403 | 0.0064 | 0.0206 | 0.0005 |       |      | 131 | 3   |     |     |
| 08JH408 24     | 400  | 576  | 0.69 |        |     | 0.1391 | 0.0029 | 0.0204 | 0.0004 |       |      | 130 | 2   |     |     |
| 08JH410 01     | 340  | 555  | 0.61 |        |     | 0.1241 | 0.0053 | 0.0188 | 0.0004 |       |      | 120 | 3   |     |     |
| 08JH410 02     | 297  | 322  | 0.92 |        |     | 0.1538 | 0.0059 | 0.0212 | 0.0004 |       |      | 135 | 3   |     |     |
| 08JH410 03     | 512  | 896  | 0.57 |        |     | 0.1473 | 0.0060 | 0.0200 | 0.0004 |       |      | 127 | 3   |     |     |
| 08JH410 04     | 424  | 513  | 0.83 |        |     | 0.1515 | 0.0068 | 0.0207 | 0.0005 |       |      | 132 | 3   |     |     |
| 08JH410 05     | 336  | 416  | 0.81 |        |     | 0.1425 | 0.0053 | 0.0209 | 0.0004 |       |      | 133 | 3   |     |     |
| 08JH410 06     | 358  | 566  | 0.63 |        |     | 0.1460 | 0.0055 | 0.0206 | 0.0004 |       |      | 131 | 3   |     |     |
| 08JH410 07     | 152  | 167  | 0.91 |        |     | 0.1452 | 0.0097 | 0.0211 | 0.0006 |       |      | 135 | 4   |     |     |
| 08JH410 08     | 148  | 128  | 1.16 |        |     | 0.1477 | 0.0135 | 0.0207 | 0.0009 |       |      | 132 | 5   |     |     |
| 08JH410 09     | 171  | 109  | 1.57 |        |     | 0.2358 | 0.0358 | 0.0194 | 0.0007 |       |      | 124 | 4   |     |     |
| 08JH410 10     | 89   | 83   | 1.07 |        |     | 0.1550 | 0.0139 | 0.0211 | 0.0008 |       |      | 135 | 5   |     |     |
| 08JH410 11     | 299  | 391  | 0.76 |        |     | 0.1467 | 0.0067 | 0.0212 | 0.0005 |       |      | 135 | 3   |     |     |
| 08JH410 12     | 306  | 262  | 1.17 |        |     | 0.1472 | 0.0083 | 0.0209 | 0.0006 |       |      | 133 | 4   |     |     |
| 08JH410 13     | 327  | 551  | 0.59 |        |     | 0.1754 | 0.0067 | 0.0207 | 0.0004 |       |      | 132 | 3   |     |     |

|             |      |      |      |        |        |        |        |     |   |
|-------------|------|------|------|--------|--------|--------|--------|-----|---|
| 08JH410 14  | 246  | 329  | 0.75 | 0.1718 | 0.0087 | 0.0180 | 0.0005 | 115 | 3 |
| 08JH410 15  | 236  | 207  | 1.14 | 0.2148 | 0.0290 | 0.0203 | 0.0007 | 130 | 4 |
| 08JH410 16  | 163  | 128  | 1.28 | 0.1960 | 0.0331 | 0.0210 | 0.0008 | 134 | 5 |
| 08JH410 17  | 390  | 515  | 0.76 | 0.1593 | 0.0045 | 0.0226 | 0.0004 | 144 | 2 |
| 08JH410 18  | 249  | 282  | 0.88 | 0.1511 | 0.0224 | 0.0205 | 0.0008 | 131 | 5 |
| 08JH410 19  | 177  | 320  | 0.55 | 0.1419 | 0.0053 | 0.0214 | 0.0004 | 137 | 3 |
| 08JH410 20  | 568  | 768  | 0.74 | 0.1469 | 0.0047 | 0.0213 | 0.0004 | 136 | 2 |
| 08JH410 21  | 119  | 176  | 0.68 | 0.1688 | 0.0104 | 0.0228 | 0.0007 | 146 | 4 |
| 08JH410 22  | 207  | 215  | 0.96 | 0.1299 | 0.0153 | 0.0205 | 0.0007 | 131 | 4 |
| 08JH410 23  | 264  | 318  | 0.83 | 0.1738 | 0.0088 | 0.0191 | 0.0005 | 122 | 3 |
| 08JH410 24  | 229  | 218  | 1.05 | 0.1543 | 0.0177 | 0.0203 | 0.0005 | 129 | 3 |
|             |      |      |      |        |        |        |        |     |   |
| 08JH-415@1  | 331  | 534  | 0.62 | 0.134  | 2.2    | 0.021  | 1.54   | 133 | 2 |
| 08JH-415@2  | 157  | 185  | 0.85 | 0.141  | 3.3    | 0.020  | 1.60   | 130 | 2 |
| 08JH-415@3  | 107  | 146  | 0.73 | 0.137  | 3.2    | 0.021  | 1.55   | 133 | 2 |
| 08JH-415@4  | 211  | 292  | 0.72 | 0.139  | 2.6    | 0.020  | 1.63   | 130 | 2 |
| 08JH-415@5  | 129  | 161  | 0.80 | 0.138  | 3.2    | 0.020  | 1.62   | 130 | 2 |
| 08JH-415@6  | 118  | 170  | 0.70 | 0.137  | 3.0    | 0.021  | 1.54   | 131 | 2 |
| 08JH-415@7  | 114  | 154  | 0.74 | 0.139  | 3.2    | 0.020  | 1.56   | 129 | 2 |
| 08JH-415@8  | 439  | 578  | 0.76 | 0.139  | 2.2    | 0.021  | 1.55   | 133 | 2 |
| 08JH-415@9  | 317  | 368  | 0.86 | 0.139  | 2.5    | 0.021  | 1.50   | 134 | 2 |
| 08JH-415@10 | 99   | 177  | 0.56 | 0.136  | 3.3    | 0.021  | 1.54   | 132 | 2 |
| 08JH-415@11 | 170  | 208  | 0.82 | 0.135  | 2.8    | 0.021  | 1.56   | 132 | 2 |
| 08JH-415@12 | 274  | 251  | 1.09 | 0.136  | 3.0    | 0.021  | 1.51   | 132 | 2 |
| 08JH-415@13 | 100  | 159  | 0.63 | 0.142  | 2.9    | 0.021  | 1.51   | 133 | 2 |
| 08JH-415@14 | 287  | 390  | 0.74 | 0.137  | 2.5    | 0.020  | 1.50   | 130 | 2 |
| 08JH-415@15 | 78   | 124  | 0.62 | 0.140  | 3.8    | 0.021  | 1.59   | 132 | 2 |
| 08JH-415@16 | 74   | 110  | 0.67 | 0.156  | 23.9   | 0.020  | 2.01   | 129 | 3 |
| 08JH-415@17 | 350  | 538  | 0.65 | 0.140  | 2.3    | 0.021  | 1.51   | 135 | 2 |
| 08JH-415@18 | 367  | 443  | 0.83 | 0.124  | 19.8   | 0.021  | 1.79   | 133 | 2 |
|             |      |      |      |        |        |        |        |     |   |
| 08JH-419@1  | 218  | 413  | 0.53 | 0.160  | 2.54   | 0.024  | 1.55   | 153 | 2 |
| 08JH-419@2  | 115  | 273  | 0.42 | 0.146  | 2.83   | 0.023  | 1.50   | 145 | 2 |
| 08JH-419@3  | 203  | 240  | 0.85 | 0.140  | 2.63   | 0.021  | 1.52   | 132 | 2 |
| 08JH-419@4  | 81   | 195  | 0.42 | 0.139  | 4.30   | 0.021  | 1.57   | 137 | 2 |
| 08JH-419@5  | 209  | 336  | 0.62 | 0.147  | 2.48   | 0.022  | 1.51   | 142 | 2 |
| 08JH-419@6  | 51   | 115  | 0.45 | 0.166  | 3.19   | 0.025  | 1.53   | 158 | 2 |
| 08JH-419@7  | 274  | 397  | 0.69 | 0.138  | 2.22   | 0.021  | 1.50   | 132 | 2 |
| 08JH-419@8  | 144  | 267  | 0.54 | 0.146  | 2.87   | 0.022  | 1.52   | 139 | 2 |
| 08JH-419@9  | 130  | 458  | 0.28 | 0.179  | 2.00   | 0.027  | 1.50   | 169 | 3 |
| 08JH-419@10 | 447  | 518  | 0.86 | 0.154  | 2.03   | 0.023  | 1.51   | 144 | 2 |
| 08JH-419@11 | 2067 | 1882 | 1.10 | 0.158  | 1.67   | 0.023  | 1.50   | 148 | 2 |
| 08JH-419@12 | 141  | 308  | 0.46 | 0.179  | 2.33   | 0.026  | 1.51   | 163 | 2 |
| 08JH-419@13 | 284  | 399  | 0.71 | 0.149  | 3.44   | 0.022  | 1.52   | 141 | 2 |
| 08JH-419@14 | 243  | 491  | 0.49 | 0.155  | 2.25   | 0.022  | 1.50   | 143 | 2 |
| 08JH-419@16 | 206  | 273  | 0.75 | 0.123  | 10.40  | 0.019  | 1.53   | 124 | 2 |
| 08JH-419@17 | 84   | 126  | 0.66 | 0.165  | 3.60   | 0.025  | 1.51   | 159 | 2 |
| 08JH-419@18 | 124  | 403  | 0.31 | 0.172  | 2.36   | 0.025  | 1.51   | 160 | 2 |
| 08JH-419@19 | 1580 | 2122 | 0.74 | 0.169  | 1.68   | 0.025  | 1.50   | 160 | 2 |
| 08JH-419@20 | 143  | 156  | 0.92 | 0.093  | 22.25  | 0.020  | 1.51   | 130 | 2 |
| 08JH-419@21 | 523  | 1160 | 0.45 | 0.154  | 1.78   | 0.023  | 1.50   | 147 | 2 |
|             |      |      |      |        |        |        |        |     |   |
| 08JH421 01  | 340  | 555  | 0.61 | 0.1491 | 0.0059 | 0.0213 | 0.0004 | 136 | 3 |
| 08JH421 02  | 297  | 322  | 0.92 | 0.1492 | 0.0047 | 0.0216 | 0.0003 | 138 | 2 |
| 08JH421 03  | 512  | 896  | 0.57 | 0.1504 | 0.0049 | 0.0216 | 0.0003 | 138 | 2 |
| 08JH421 04  | 424  | 513  | 0.83 | 0.1831 | 0.0083 | 0.0264 | 0.0006 | 168 | 4 |
| 08JH421 05  | 336  | 416  | 0.81 | 0.1483 | 0.0075 | 0.0213 | 0.0005 | 136 | 3 |
| 08JH421 06  | 358  | 566  | 0.63 | 0.1429 | 0.0098 | 0.0208 | 0.0006 | 133 | 4 |
| 08JH421 07  | 152  | 167  | 0.91 | 0.1423 | 0.0076 | 0.0207 | 0.0005 | 132 | 3 |
| 08JH421 08  | 148  | 128  | 1.16 | 0.1505 | 0.0049 | 0.0217 | 0.0004 | 139 | 2 |
| 08JH421 09  | 171  | 109  | 1.57 | 0.1398 | 0.0043 | 0.0202 | 0.0003 | 129 | 2 |
| 08JH421 10  | 89   | 83   | 1.07 | 0.1514 | 0.0090 | 0.0219 | 0.0005 | 139 | 3 |
| 08JH421 11  | 299  | 394  | 0.76 | 0.1459 | 0.0279 | 0.0223 | 0.0011 | 142 | 7 |
| 08JH421 12  | 306  | 262  | 1.17 | 0.1513 | 0.0083 | 0.0220 | 0.0006 | 140 | 3 |
| 08JH421 13  | 327  | 551  | 0.59 | 0.1821 | 0.0080 | 0.0231 | 0.0005 | 147 | 3 |
| 08JH421 14  | 246  | 329  | 0.75 | 0.1590 | 0.0096 | 0.0220 | 0.0006 | 140 | 4 |
| 08JH421 15  | 236  | 207  | 1.14 | 0.1512 | 0.0064 | 0.0217 | 0.0005 | 138 | 3 |
| 08JH421 16  | 163  | 128  | 1.28 | 0.1568 | 0.0034 | 0.0228 | 0.0003 | 146 | 2 |
| 08JH421 17  | 390  | 515  | 0.76 | 0.1435 | 0.0057 | 0.0214 | 0.0004 | 137 | 3 |
| 08JH421 18  | 249  | 282  | 0.88 | 0.1464 | 0.0065 | 0.0209 | 0.0005 | 133 | 3 |
| 08JH421 19  | 177  | 320  | 0.55 | 0.1600 | 0.0086 | 0.0215 | 0.0006 | 137 | 3 |
| 08JH421 20  | 568  | 768  | 0.74 | 0.1350 | 0.0161 | 0.0210 | 0.0007 | 134 | 4 |
| 08JH421 21  | 119  | 176  | 0.68 | 0.1728 | 0.0070 | 0.0202 | 0.0005 | 129 | 3 |
| 08JH421 22  | 207  | 215  | 0.96 | 0.1514 | 0.0089 | 0.0216 | 0.0006 | 138 | 4 |
| 08JH421 23  | 264  | 318  | 0.83 | 0.1453 | 0.0057 | 0.0216 | 0.0004 | 137 | 3 |
| 08JH421 24  | 229  | 218  | 1.05 | 0.1400 | 0.0076 | 0.0206 | 0.0005 | 131 | 3 |
|             |      |      |      |        |        |        |        |     |   |
| 08JH425 01  | 188  | 389  | 0.48 | 0.0479 | 0.0011 | 0.1422 | 0.0030 | 138 | 3 |
| 08JH425 02  | 132  | 262  | 0.50 | 0.0485 | 0.0017 | 0.1616 | 0.0051 | 154 | 3 |
| 08JH425 03  | 99   | 156  | 0.64 | 0.0503 | 0.0035 | 0.1464 | 0.0093 | 135 | 4 |
| 08JH425 04  | 479  | 708  | 0.68 | 0.0495 | 0.0010 | 0.1446 | 0.0027 | 135 | 2 |
| 08JH425 05  | 167  | 265  | 0.63 | 0.0563 | 0.0030 | 0.1572 | 0.0075 | 129 | 4 |
| 08JH425 06  | 263  | 355  | 0.74 | 0.0567 | 0.0014 | 0.1697 | 0.0039 | 139 | 3 |
| 08JH425 07  | 149  | 250  | 0.60 | 0.0582 | 0.0019 | 0.1749 | 0.0052 | 139 | 3 |
| 08JH425 08  | 331  | 422  | 0.78 | 0.0491 | 0.0017 | 0.1440 | 0.0046 | 136 | 3 |

|            |      |     |      |         |         |         |         |         |         |         |         |     |      |     |    |     |   |     |     |      |   |
|------------|------|-----|------|---------|---------|---------|---------|---------|---------|---------|---------|-----|------|-----|----|-----|---|-----|-----|------|---|
| 08JH425 09 | 113  | 142 | 0.79 |         |         | 0.0540  | 0.0027  | 0.1485  | 0.0069  |         |         |     |      |     |    |     |   |     |     | 128  | 3 |
| 08JH425 10 | 173  | 250 | 0.69 |         |         | 0.0578  | 0.0026  | 0.1636  | 0.0066  |         |         |     |      |     |    |     |   |     |     | 131  | 3 |
| 08JH425 11 | 167  | 324 | 0.52 |         |         | 0.0527  | 0.0047  | 0.1572  | 0.0132  |         |         |     |      |     |    |     |   |     |     | 138  | 4 |
| 08JH425 12 | 181  | 218 | 0.83 |         |         | 0.0520  | 0.0027  | 0.1516  | 0.0071  |         |         |     |      |     |    |     |   |     |     | 135  | 4 |
| 08JH425 13 | 97   | 140 | 0.70 |         |         | 0.0490  | 0.0031  | 0.1531  | 0.0090  |         |         |     |      |     |    |     |   |     |     | 145  | 4 |
| 08JH425 14 | 191  | 314 | 0.61 |         |         | 0.0560  | 0.0023  | 0.1536  | 0.0058  |         |         |     |      |     |    |     |   |     |     | 127  | 3 |
| 08JH425 15 | 512  | 774 | 0.66 |         |         | 0.0523  | 0.0012  | 0.1533  | 0.0031  |         |         |     |      |     |    |     |   |     |     | 136  | 3 |
| 08JH425 16 | 143  | 152 | 0.95 |         |         | 0.0520  | 0.0033  | 0.1459  | 0.0087  |         |         |     |      |     |    |     |   |     |     | 130  | 4 |
| 08JH425 17 | 498  | 832 | 0.60 |         |         | 0.0513  | 0.0014  | 0.1520  | 0.0038  |         |         |     |      |     |    |     |   |     |     | 137  | 3 |
| 08JH425 18 | 334  | 288 | 1.16 |         |         | 0.0645  | 0.0059  | 0.1798  | 0.0157  |         |         |     |      |     |    |     |   |     |     | 129  | 3 |
| 08JH425 19 | 101  | 488 | 0.21 |         |         | 0.0487  | 0.0026  | 0.1417  | 0.0067  |         |         |     |      |     |    |     |   |     |     | 135  | 3 |
| 08JH425 20 | 592  | 572 | 1.04 |         |         | 0.0700  | 0.0053  | 0.2031  | 0.0146  |         |         |     |      |     |    |     |   |     |     | 134  | 3 |
| 08JH425 21 | 193  | 262 | 0.74 |         |         | 0.0662  | 0.0057  | 0.1781  | 0.0145  |         |         |     |      |     |    |     |   |     |     | 124  | 3 |
| 08JH425 22 | 280  | 338 | 0.83 |         |         | 0.0565  | 0.0026  | 0.1642  | 0.0067  |         |         |     |      |     |    |     |   |     |     | 135  | 3 |
| 08JH425 23 | 187  | 192 | 0.97 |         |         | 0.0711  | 0.0167  | 0.1823  | 0.0418  |         |         |     |      |     |    |     |   |     |     | 119  | 6 |
| 08JH425 24 | 450  | 433 | 1.04 |         |         | 0.0552  | 0.0025  | 0.1529  | 0.0063  |         |         |     |      |     |    |     |   |     |     | 128  | 3 |
|            |      |     |      |         |         |         |         |         |         |         |         |     |      |     |    |     |   |     |     |      |   |
| NY19-01    | 122  | 154 | 0.79 | 0.05189 | 0.01132 | 0.14780 | 0.03199 | 0.02069 | 0.00068 | 0.00503 | 0.00096 | 281 | 409  | 140 | 28 | 132 | 4 | 101 | 19  | 0.94 |   |
| NY19-02    | 253  | 197 | 1.29 | 0.04864 | 0.01345 | 0.13676 | 0.03745 | 0.02042 | 0.00090 | 0.00389 | 0.00095 | 131 | 469  | 130 | 33 | 130 | 6 | 78  | 19  | 1.00 |   |
| NY19-03    | 277  | 304 | 0.91 | 0.04832 | 0.00542 | 0.13467 | 0.01503 | 0.02023 | 0.00042 | 0.00366 | 0.00055 | 115 | 239  | 128 | 13 | 129 | 3 | 74  | 11  | 1.01 |   |
| NY19-04    | 526  | 336 | 1.57 | 0.05056 | 0.00489 | 0.14332 | 0.01378 | 0.02059 | 0.00044 | 0.00260 | 0.00029 | 221 | 221  | 136 | 12 | 131 | 3 | 52  | 6   | 0.96 |   |
| NY19-06    | 181  | 120 | 1.51 | 0.04788 | 0.01314 | 0.13454 | 0.03676 | 0.02040 | 0.00066 | 0.00456 | 0.00087 | 93  | 456  | 128 | 33 | 130 | 4 | 92  | 18  | 1.02 |   |
| NY19-07    | 79   | 58  | 1.36 | 0.05014 | 0.02444 | 0.14199 | 0.06896 | 0.02055 | 0.00094 | 0.00513 | 0.00117 | 201 | 849  | 135 | 61 | 131 | 6 | 103 | 24  | 0.97 |   |
| NY19-08    | 372  | 160 | 2.33 | 0.04847 | 0.01447 | 0.13716 | 0.04066 | 0.02056 | 0.00084 | 0.00384 | 0.00106 | 122 | 502  | 131 | 36 | 131 | 5 | 77  | 21  | 1.00 |   |
| NY19-09    | 295  | 273 | 1.08 | 0.04859 | 0.00971 | 0.13828 | 0.02736 | 0.02065 | 0.00072 | 0.00721 | 0.00311 | 128 | 356  | 132 | 24 | 132 | 5 | 145 | 62  | 1.00 |   |
| NY19-10    | 89   | 64  | 1.39 | 0.04770 | 0.02886 | 0.13632 | 0.08217 | 0.02073 | 0.00116 | 0.00686 | 0.00383 | 84  | 973  | 130 | 73 | 132 | 7 | 138 | 77  | 1.02 |   |
| NY19-12    | 264  | 273 | 0.97 | 0.04692 | 0.00593 | 0.13276 | 0.01668 | 0.02054 | 0.00049 | 0.00314 | 0.00044 | 45  | 252  | 127 | 15 | 131 | 3 | 63  | 9   | 1.03 |   |
| NY19-13    | 97   | 107 | 0.91 | 0.04745 | 0.01293 | 0.13734 | 0.03727 | 0.02100 | 0.00065 | 0.01125 | 0.00314 | 72  | 451  | 131 | 33 | 134 | 4 | 226 | 63  | 1.02 |   |
| NY19-14    | 304  | 188 | 1.61 | 0.05014 | 0.01045 | 0.14304 | 0.02957 | 0.02071 | 0.00069 | 0.00314 | 0.00062 | 201 | 383  | 136 | 26 | 132 | 4 | 63  | 12  | 0.97 |   |
| NY19-15    | 64   | 49  | 1.32 | 0.04849 | 0.03472 | 0.13924 | 0.09929 | 0.02084 | 0.00142 | 0.00581 | 0.00203 | 123 | 1079 | 132 | 88 | 133 | 9 | 117 | 41  | 1.01 |   |
| NY19-16    | 308  | 435 | 0.71 | 0.04718 | 0.00424 | 0.13518 | 0.01207 | 0.02080 | 0.00046 | 0.00439 | 0.00115 | 58  | 199  | 129 | 11 | 133 | 3 | 89  | 23  | 1.03 |   |
| NY19-17    | 60   | 52  | 1.15 | 0.04881 | 0.02619 | 0.13742 | 0.07346 | 0.02043 | 0.00101 | 0.00538 | 0.00156 | 139 | 940  | 131 | 66 | 130 | 6 | 108 | 31  | 0.99 |   |
| NY19-18    | 362  | 422 | 0.86 | 0.04959 | 0.00926 | 0.13909 | 0.02557 | 0.02035 | 0.00081 | 0.01014 | 0.01138 | 176 | 346  | 132 | 23 | 130 | 5 | 204 | 228 | 0.98 |   |
| NY19-19    | 66   | 54  | 1.23 | 0.04897 | 0.03223 | 0.13927 | 0.09127 | 0.02064 | 0.00133 | 0.00361 | 0.00170 | 146 | 1034 | 132 | 81 | 132 | 8 | 73  | 34  | 1.00 |   |
| NY19-20    | 122  | 111 | 1.1  | 0.04798 | 0.01533 | 0.13720 | 0.04359 | 0.02074 | 0.00080 | 0.00544 | 0.00197 | 98  | 533  | 131 | 39 | 132 | 5 | 110 | 40  | 1.01 |   |
|            |      |     |      |         |         |         |         |         |         |         |         |     |      |     |    |     |   |     |     |      |   |
| NY20-01    | 192  | 176 | 1.09 | 0.04896 | 0.01347 | 0.14882 | 0.04063 | 0.02206 | 0.00085 | 0.00972 | 0.00498 | 146 | 468  | 141 | 36 | 141 | 5 | 196 | 100 | 1.00 |   |
| NY20-02    | 322  | 197 | 1.63 | 0.04640 | 0.02287 | 0.13491 | 0.06590 | 0.02110 | 0.00145 | 0.00819 | 0.00507 | 18  | 823  | 129 | 59 | 135 | 9 | 165 | 102 | 1.05 |   |
| NY20-03    | 188  | 149 | 1.26 | 0.04896 | 0.01117 | 0.14023 | 0.03183 | 0.02078 | 0.00062 | 0.00503 | 0.00110 | 146 | 399  | 133 | 28 | 133 | 4 | 101 | 22  | 1.00 |   |
| NY20-04    | 1435 | 555 | 2.59 | 0.04791 | 0.00473 | 0.13115 | 0.01283 | 0.01986 | 0.00048 | 0.00399 | 0.00088 | 95  | 220  | 125 | 12 | 127 | 3 | 80  | 18  | 1.02 |   |
| NY20-05    | 165  | 137 | 1.2  | 0.04747 | 0.01655 | 0.13669 | 0.04737 | 0.02089 | 0.00092 | 0.00314 | 0.00079 | 73  | 576  | 130 | 42 | 133 | 6 | 63  | 16  | 1.02 |   |
| NY20-06    | 77   | 62  | 1.25 | 0.04660 | 0.02267 | 0.13564 | 0.06578 | 0.02111 | 0.00092 | 0.00780 | 0.00271 | 29  | 834  | 129 | 59 | 135 | 6 | 157 | 54  | 1.05 |   |
| NY20-07    | 415  | 440 | 0.94 | 0.04550 | 0.00344 | 0.12826 | 0.00970 | 0.02045 | 0.00038 | 0.00337 | 0.00061 | -28 | 165  | 123 | 9  | 130 | 2 | 68  | 12  | 1.06 |   |
| NY20-08    | 323  | 199 | 1.47 | 0.04958 | 0.00807 | 0.13882 | 0.02243 | 0.02031 | 0.00054 | 0.01032 | 0.00671 | 175 | 316  | 132 | 20 | 130 | 3 | 208 | 134 | 0.98 |   |
| NY20-09    | 204  | 197 | 1.04 | 0.05003 | 0.00786 | 0.13811 | 0.02157 | 0.02002 | 0.00049 | 0.00563 | 0.00193 | 196 | 317  | 131 | 19 | 128 | 3 | 113 | 39  | 0.98 |   |
| NY20-10    | 331  | 250 | 1.32 | 0.04912 | 0.00573 | 0.13745 | 0.01597 | 0.02029 | 0.00043 | 0.00514 | 0.00143 | 154 | 253  | 131 | 14 | 129 | 3 | 104 | 29  | 0.98 |   |
| NY20-11    | 136  | 89  | 1.53 | 0.04879 | 0.03168 | 0.13589 | 0.08775 | 0.02020 | 0.00145 | 0.00672 | 0.00254 | 138 | 1034 | 129 | 78 | 129 | 9 | 135 | 51  | 1.00 |   |
| NY20-12    | 160  | 120 | 1.34 | 0.04886 | 0.02048 | 0.13965 | 0.05817 | 0.02072 | 0.00104 | 0.00652 | 0.00284 | 141 | 716  | 133 | 52 | 132 | 7 | 131 | 57  | 0.99 |   |
| NY20-13    | 295  | 295 | 1    | 0.04989 | 0.00918 | 0.14243 | 0.02591 | 0.02071 | 0.00071 | 0.00454 | 0.00123 | 190 | 344  | 135 | 23 | 132 | 4 | 92  | 25  | 0.98 |   |
| NY20-14    | 112  | 103 | 1.09 | 0.05038 | 0.01881 | 0.14158 | 0.05257 | 0.02038 | 0.00090 | 0.00566 | 0.00149 | 213 | 649  | 134 | 47 | 130 | 6 | 114 | 30  | 0.97 |   |
| NY20-15    | 307  | 207 | 1.48 | 0.04561 | 0.01096 | 0.13247 | 0.03162 | 0.02107 | 0.00074 | 0.00331 | 0.00085 | -23 | 391  | 126 | 28 | 134 | 5 | 67  | 17  | 1.06 |   |
| NY20-16    | 238  | 299 | 0.79 | 0.04637 | 0.00889 | 0.13397 | 0.02538 | 0.02096 | 0.00076 | 0.00129 | 0.00025 | 17  | 329  | 128 | 23 | 134 | 5 | 26  | 5   | 1.05 |   |
| NY20-17    | 98   | 120 | 0.82 | 0.05105 | 0.01590 | 0.14598 | 0.04520 | 0.02073 | 0.00081 | 0.00723 | 0.00339 | 243 | 544  | 138 | 40 | 132 | 5 | 146 | 68  | 0.96 |   |
| NY20-19    | 183  | 141 | 1.3  | 0.04885 | 0.01297 | 0.14092 | 0.03720 | 0.02092 | 0.00075 | 0.00231 | 0.00045 | 141 | 453  | 134 | 33 | 133 | 5 | 47  | 9   | 0.99 |   |
|            |      |     |      |         |         |         |         |         |         |         |         |     |      |     |    |     |   |     |     |      |   |
| NY21-01    | 392  | 379 | 1.04 | 0.05069 | 0.00809 | 0.14349 | 0.02237 | 0.02054 | 0.00081 | 0.00036 | 0.00006 | 227 | 323  | 136 | 20 | 131 | 5 | 7   | 1   | 0.96 |   |
| NY21-02    | 446  | 348 | 1.28 | 0.04981 | 0.00486 | 0.13797 | 0.01344 | 0.02009 | 0.00041 | 0.00409 | 0.00072 | 186 | 222  | 131 | 12 | 128 | 3 | 82  | 14  | 0.98 |   |
| NY21-03    | 524  | 545 | 0.96 | 0.04640 | 0.00333 | 0.13228 | 0.00950 | 0.02067 | 0.00039 | 0.00335 | 0.00046 | 18  | 159  | 126 | 9  | 132 | 2 | 68  | 9   | 1.05 |   |
| NY21-04    | 482  | 401 | 1.2  | 0.04685 | 0.00421 | 0.13310 | 0.01195 | 0.02060 | 0.00040 | 0.00466 | 0.00097 | 42  | 199  | 127 | 11 | 131 | 3 | 94  | 20  | 1.03 |   |
| NY21-05    | 151  | 120 | 1.26 | 0.04792 | 0.01925 | 0.13524 | 0.05390 | 0.02048 | 0.00111 | 0.00079 | 0.00020 | 95  | 674  | 129 | 48 | 131 | 7 | 16  | 4   | 1.02 |   |
| NY21-06    | 489  | 410 | 1.19 | 0.04775 | 0.00414 | 0.13898 | 0.01204 | 0.02111 | 0.00041 | 0.00484 | 0.00103 | 87  | 195  | 132 | 11 | 135 | 3 | 98  | 21  | 1.02 |   |
| NY21-07    | 283  | 247 | 1.15 | 0.04731 | 0.01002 | 0.13473 | 0.02824 | 0.02064 | 0.00075 | 0.00136 | 0.00023 | 65  | 365  | 128 | 25 | 132 | 5 | 27  | 5   | 1.03 |   |
| NY21-08    | 236  | 318 | 0.74 | 0.04886 | 0.00537 | 0.13858 | 0.01517 | 0.02058 | 0.00043 | 0.00580 | 0.00173 | 141 | 243  | 132 | 14 | 131 | 3 | 117 | 35  | 0.99 |   |
| NY21-09    | 302  | 220 | 1.37 | 0.04953 | 0.02162 | 0.13895 | 0.05999 | 0.02032 | 0.00140 | 0.00258 | 0.00159 | 173 | 757  | 132 | 53 | 130 | 9 | 52  | 32  | 0.98 |   |
| NY21-10    | 178  | 114 | 1.56 | 0.04843 | 0.02119 | 0.13880 | 0.06043 | 0.02083 | 0.00098 | 0.00781 | 0.00497 | 120 | 751  | 132 | 54 | 133 | 6 | 157 | 100 | 1.01 |   |
| NY21-11    | 363  | 239 | 1.52 | 0.04865 | 0.00795 | 0.13571 | 0.02207 | 0.02026 | 0.00049 | 0.00784 | 0.00266 | 131 | 307  | 129 | 20 | 129 | 3 | 158 | 53  | 1.00 |   |
| NY21-12    | 232  | 271 | 0.85 | 0.04865 | 0.00605 | 0.14085 | 0.01746 | 0.02100 | 0.00044 | 0.00411 | 0.00074 | 131 | 258  | 134 | 16 | 134 | 3 | 83  | 15  |      |   |

| Object     | RA   | Dec | Size | RA     | Dec    | Size   | RA     | Dec | Size | RA  | Dec | Size |
|------------|------|-----|------|--------|--------|--------|--------|-----|------|-----|-----|------|
| 08JH229 01 | 556  | 766 | 0.73 | 0.0492 | 0.0008 | 0.1719 | 0.0025 |     |      | 161 | 2   |      |
| 08JH229 02 | 1149 | 545 | 2.11 | 0.0504 | 0.0009 | 0.1715 | 0.0028 |     |      | 157 | 2   |      |
| 08JH229 03 | 213  | 388 | 0.55 | 0.0504 | 0.0013 | 0.1667 | 0.0039 |     |      | 153 | 2   |      |
| 08JH229 04 | 126  | 227 | 0.56 | 0.0484 | 0.0018 | 0.1621 | 0.0057 |     |      | 155 | 2   |      |
| 08JH229 05 | 146  | 270 | 0.54 | 0.0493 | 0.0023 | 0.1628 | 0.0071 |     |      | 153 | 3   |      |
| 08JH229 06 | 149  | 296 | 0.50 | 0.0514 | 0.0024 | 0.1729 | 0.0073 |     |      | 155 | 3   |      |
| 08JH229 08 | 169  | 285 | 0.59 | 0.0491 | 0.0031 | 0.1694 | 0.0102 |     |      | 159 | 3   |      |
| 08JH229 09 | 102  | 164 | 0.62 | 0.0538 | 0.0037 | 0.1686 | 0.0107 |     |      | 145 | 4   |      |
| 08JH229 10 | 396  | 537 | 0.74 | 0.0542 | 0.0027 | 0.1817 | 0.0081 |     |      | 155 | 3   |      |
| 08JH229 11 | 208  | 341 | 0.61 | 0.0497 | 0.0013 | 0.1666 | 0.0040 |     |      | 155 | 2   |      |
| 08JH229 12 | 125  | 248 | 0.50 | 0.0506 | 0.0027 | 0.1706 | 0.0085 |     |      | 156 | 4   |      |
| 08JH229 13 | 328  | 447 | 0.73 | 0.0513 | 0.0014 | 0.1764 | 0.0045 |     |      | 159 | 2   |      |
| 08JH229 14 | 274  | 455 | 0.60 | 0.0506 | 0.0015 | 0.1770 | 0.0047 |     |      | 161 | 2   |      |
| 08JH229 15 | 229  | 457 | 0.50 | 0.0499 | 0.0025 | 0.1567 | 0.0076 |     |      | 145 | 2   |      |
| 08JH229 16 | 137  | 272 | 0.50 | 0.0525 | 0.0021 | 0.1737 | 0.0065 |     |      | 153 | 3   |      |
| 08JH229 17 | 111  | 210 | 0.53 | 0.0511 | 0.0019 | 0.1748 | 0.0059 |     |      | 158 | 2   |      |
| 08JH229 18 | 153  | 269 | 0.57 | 0.0508 | 0.0017 | 0.1789 | 0.0056 |     |      | 163 | 2   |      |
| 08JH229 19 | 178  | 264 | 0.67 | 0.0517 | 0.0015 | 0.1761 | 0.0048 |     |      | 157 | 2   |      |
| 08JH229 20 | 470  | 503 | 0.94 | 0.0512 | 0.0013 | 0.1808 | 0.0041 |     |      | 163 | 2   |      |
| 08JH229 21 | 138  | 276 | 0.50 | 0.0510 | 0.0016 | 0.1763 | 0.0051 |     |      | 160 | 2   |      |
| 08JH229 22 | 132  | 250 | 0.53 | 0.0506 | 0.0021 | 0.1751 | 0.0068 |     |      | 160 | 3   |      |
| 08JH229 23 | 115  | 213 | 0.54 | 0.0528 | 0.0029 | 0.1797 | 0.0092 |     |      | 157 | 4   |      |
| 08JH229 24 | 265  | 380 | 0.70 | 0.0506 | 0.0016 | 0.1701 | 0.0049 |     |      | 155 | 2   |      |
| 08JH239 01 | 232  | 451 | 0.52 | 0.2806 | 0.0061 | 0.0407 | 0.0008 |     |      | 257 | 5   |      |
| 08JH239 02 | 338  | 614 | 0.55 | 0.1550 | 0.0032 | 0.0212 | 0.0004 |     |      | 135 | 2   |      |
| 08JH239 04 | 367  | 365 | 1.00 | 0.1835 | 0.0084 | 0.0195 | 0.0006 |     |      | 125 | 3   |      |

|                       |                |                |                 |                   |                   |                   |                   |                |              |
|-----------------------|----------------|----------------|-----------------|-------------------|-------------------|-------------------|-------------------|----------------|--------------|
| 08JH239 05            | 366            | 449            | 0.82            | 0.1817            | 0.0094            | 0.0199            | 0.0006            | 127            | 4            |
| 08JH239 06            | 163            | 204            | 0.80            | 0.1182            | 0.0221            | 0.0164            | 0.0007            | 105            | 5            |
| 08JH239 07            | 215            | 382            | 0.56            | 0.1511            | 0.0044            | 0.0218            | 0.0004            | 139            | 3            |
| 08JH239 08            | 142            | 220            | 0.65            | 0.1192            | 0.0049            | 0.0160            | 0.0004            | 102            | 2            |
| 08JH239 09            | 174            | 210            | 0.83            | 0.1447            | 0.0059            | 0.0203            | 0.0005            | 129            | 3            |
| 08JH239 10            | 174            | 224            | 0.78            | 0.1726            | 0.0084            | 0.0223            | 0.0006            | 142            | 4            |
| 08JH239 11            | 115            | 189            | 0.61            | 0.1096            | 0.0145            | 0.0155            | 0.0006            | 99             | 4            |
| 08JH239 12            | 134            | 235            | 0.57            | 0.1211            | 0.0115            | 0.0163            | 0.0007            | 104            | 5            |
| 08JH239 13            | 176            | 260            | 0.68            | 0.1018            | 0.0103            | 0.0160            | 0.0005            | 103            | 3            |
| 08JH239 14            | 68             | 107            | 0.64            | 0.1065            | 0.0139            | 0.0168            | 0.0008            | 107            | 5            |
| 08JH239 15            | 224            | 284            | 0.79            | 0.1467            | 0.0049            | 0.0214            | 0.0005            | 136            | 3            |
| 08JH239 16            | 233            | 275            | 0.84            | 0.1556            | 0.0054            | 0.0223            | 0.0005            | 142            | 3            |
| 08JH239 17            | 218            | 421            | 0.52            | 0.1475            | 0.0046            | 0.0217            | 0.0005            | 139            | 3            |
| <del>08JH239 18</del> | <del>115</del> | <del>157</del> | <del>0.73</del> | <del>0.1822</del> | <del>0.0749</del> | <del>0.0164</del> | <del>0.0014</del> | <del>105</del> | <del>9</del> |
| 08JH239 19            | 151            | 193            | 0.78            | 0.1216            | 0.0095            | 0.0164            | 0.0006            | 105            | 4            |
| 08JH239 20            | 193            | 333            | 0.58            | 0.1412            | 0.0048            | 0.0216            | 0.0005            | 138            | 3            |
| 08JH239 22            | 177            | 258            | 0.69            | 0.1199            | 0.0056            | 0.0175            | 0.0004            | 112            | 3            |
| 08JH239 24            | 182            | 262            | 0.70            | 0.1178            | 0.0089            | 0.0186            | 0.0007            | 119            | 4            |
|                       |                |                |                 |                   |                   |                   |                   |                |              |
| 08JH 439 01           | 123            | 142            | 0.87            | 0.0989            | 0.0140            | 0.0145            | 0.0005            | 93             | 3            |
| 08JH 439 02           | 243            | 396            | 0.61            | 0.1053            | 0.0033            | 0.0148            | 0.0003            | 95             | 2            |
| 08JH 439 04           | 510            | 794            | 0.64            | 0.1001            | 0.0017            | 0.0150            | 0.0003            | 96             | 2            |
| 08JH 439 05           | 176            | 177            | 0.99            | 0.1073            | 0.0087            | 0.0143            | 0.0005            | 91             | 3            |
| 08JH 439 06           | 123            | 200            | 0.62            | 0.1026            | 0.0048            | 0.0147            | 0.0003            | 94             | 2            |
| 08JH 439 07           | 125            | 154            | 0.81            | 0.1080            | 0.0079            | 0.0152            | 0.0004            | 97             | 3            |
| 08JH 439 08           | 115            | 173            | 0.67            | 0.0986            | 0.0077            | 0.0146            | 0.0004            | 93             | 3            |
| 08JH 439 09           | 133            | 132            | 1.01            | 0.1059            | 0.0100            | 0.0151            | 0.0005            | 96             | 3            |
| 08JH 439 10           | 132            | 149            | 0.89            | 0.1109            | 0.0124            | 0.0154            | 0.0006            | 99             | 4            |
| 08JH 439 11           | 554            | 1012           | 0.55            | 0.1086            | 0.0031            | 0.0153            | 0.0003            | 98             | 2            |
| 08JH 439 12           | 96             | 145            | 0.66            | 0.1028            | 0.0081            | 0.0150            | 0.0004            | 96             | 3            |
| 08JH 439 13           | 214            | 172            | 1.24            | 0.1319            | 0.0209            | 0.0144            | 0.0009            | 92             | 5            |
| 08JH 439 14           | 85             | 135            | 0.63            | 0.1017            | 0.0088            | 0.0144            | 0.0004            | 92             | 3            |
| 08JH 439 15           | 105            | 84             | 1.25            | 0.1281            | 0.0289            | 0.0153            | 0.0007            | 98             | 4            |
| 08JH 439 16           | 99             | 176            | 0.56            | 0.1015            | 0.0052            | 0.0149            | 0.0003            | 95             | 2            |
| 08JH 439 17           | 104            | 121            | 0.85            | 0.1088            | 0.0091            | 0.0149            | 0.0004            | 95             | 3            |
| 08JH 439 18           | 244            | 296            | 0.82            | 0.1043            | 0.0098            | 0.0142            | 0.0004            | 91             | 2            |
| 08JH 439 19           | 1020           | 1487           | 0.69            | 0.1131            | 0.0041            | 0.0153            | 0.0003            | 98             | 2            |
| 08JH 439 20           | 1121           | 2065           | 0.54            | 0.1042            | 0.0017            | 0.0152            | 0.0003            | 97             | 2            |
| 08JH 439 21           | 271            | 438            | 0.62            | 0.1003            | 0.0044            | 0.0140            | 0.0003            | 90             | 2            |
| 08JH 439 22           | 441            | 679            | 0.65            | 0.1002            | 0.0120            | 0.0144            | 0.0004            | 92             | 3            |
| 08JH 439 23           | 135            | 176            | 0.76            | 0.1009            | 0.0092            | 0.0145            | 0.0005            | 93             | 3            |
| 08JH 439 24           | 66             | 108            | 0.61            | 0.1111            | 0.0137            | 0.0143            | 0.0006            | 92             | 4            |

#### Guangdong province

N21, Fengshun, (Guo et al., 2012). Out of the map

|           |      |      |      |        |        |        |        |     |   |
|-----------|------|------|------|--------|--------|--------|--------|-----|---|
| 09GF-5 01 | 116  | 134  | 0.86 | 0.1756 | 0.0246 | 0.0249 | 0.0008 | 158 | 5 |
| 09GF-5 02 | 139  | 252  | 0.55 | 0.1521 | 0.0114 | 0.0216 | 0.0004 | 138 | 3 |
| 09GF-5 03 | 112  | 210  | 0.53 | 0.1661 | 0.0084 | 0.0238 | 0.0005 | 151 | 3 |
| 09GF-5 04 | 189  | 237  | 0.80 | 0.1539 | 0.0121 | 0.0217 | 0.0004 | 138 | 3 |
| 09GF-5 05 | 66   | 103  | 0.64 | 0.1544 | 0.0101 | 0.0233 | 0.0006 | 148 | 3 |
| 09GF-5 06 | 117  | 141  | 0.83 | 0.1833 | 0.0173 | 0.0238 | 0.0005 | 151 | 3 |
| 09GF-5 07 | 1497 | 2146 | 0.70 | 0.1651 | 0.0029 | 0.0239 | 0.0003 | 152 | 2 |
| 09GF-5 08 | 278  | 362  | 0.77 | 0.1608 | 0.0071 | 0.0227 | 0.0004 | 145 | 3 |
| 09GF-5 09 | 241  | 347  | 0.69 | 0.1613 | 0.0058 | 0.0223 | 0.0004 | 142 | 2 |
| 09GF-5 10 | 290  | 539  | 0.54 | 0.1575 | 0.0080 | 0.0219 | 0.0003 | 139 | 2 |
| 09GF-5 11 | 252  | 308  | 0.82 | 0.1596 | 0.0058 | 0.0231 | 0.0004 | 147 | 2 |
| 09GF-5 12 | 164  | 281  | 0.59 | 0.1579 | 0.0058 | 0.0231 | 0.0004 | 147 | 2 |
| 09GF-5 13 | 267  | 359  | 0.74 | 0.1561 | 0.0060 | 0.0230 | 0.0004 | 147 | 2 |
| 09GF-5 14 | 183  | 252  | 0.73 | 0.1632 | 0.0074 | 0.0229 | 0.0005 | 146 | 3 |
| 09GF-5 15 | 160  | 224  | 0.71 | 0.1559 | 0.0083 | 0.0227 | 0.0005 | 145 | 3 |
| 09GF-5 16 | 426  | 603  | 0.71 | 0.1613 | 0.0044 | 0.0230 | 0.0003 | 146 | 2 |
| 09GF-5 17 | 59   | 146  | 0.40 | 0.1725 | 0.0102 | 0.0254 | 0.0006 | 162 | 4 |
| 09GF-5 18 | 112  | 252  | 0.45 | 0.1666 | 0.0095 | 0.0231 | 0.0006 | 147 | 3 |
| 09GF-5 19 | 123  | 227  | 0.54 | 0.1517 | 0.0088 | 0.0235 | 0.0005 | 150 | 3 |
| 09GF-5 20 | 455  | 443  | 1.03 | 0.1632 | 0.0057 | 0.0231 | 0.0004 | 147 | 2 |
| 09GF-5 21 | 206  | 383  | 0.54 | 0.1595 | 0.0076 | 0.0225 | 0.0005 | 143 | 3 |
| 09GF-5 22 | 60   | 109  | 0.54 | 0.1568 | 0.0097 | 0.0226 | 0.0006 | 144 | 3 |
| 09GF-5 23 | 267  | 391  | 0.68 | 0.1568 | 0.0050 | 0.0231 | 0.0004 | 147 | 2 |
| 09GF-5 24 | 198  | 339  | 0.58 | 0.1684 | 0.0064 | 0.0248 | 0.0004 | 158 | 3 |
|           |      |      |      |        |        |        |        |     |   |
| 09GF-9 01 | 404  | 550  | 0.73 | 0.1581 | 0.0031 | 0.0226 | 0.0003 | 144 | 2 |
| 09GF-9 02 | 269  | 643  | 0.42 | 0.1589 | 0.0035 | 0.0229 | 0.0003 | 146 | 2 |
| 09GF-9 03 | 171  | 330  | 0.52 | 0.1590 | 0.0050 | 0.0225 | 0.0003 | 144 | 2 |
| 09GF-9 04 | 537  | 606  | 0.89 | 0.1556 | 0.0029 | 0.0226 | 0.0003 | 144 | 2 |
| 09GF-9 05 | 83   | 233  | 0.36 | 0.1769 | 0.0055 | 0.0242 | 0.0003 | 154 | 2 |
| 09GF-9 06 | 239  | 337  | 0.71 | 0.1564 | 0.0037 | 0.0228 | 0.0003 | 145 | 2 |
| 09GF-9 07 | 274  | 394  | 0.70 | 0.1504 | 0.0034 | 0.0229 | 0.0003 | 146 | 2 |
| 09GF-9 08 | 60   | 135  | 0.45 | 0.1695 | 0.0080 | 0.0250 | 0.0005 | 159 | 3 |
| 09GF-9 09 | 522  | 545  | 0.96 | 0.1544 | 0.0033 | 0.0223 | 0.0003 | 142 | 2 |
| 09GF-9 10 | 71   | 190  | 0.37 | 0.1558 | 0.0063 | 0.0221 | 0.0004 | 141 | 2 |
| 09GF-9 11 | 679  | 650  | 1.05 | 0.1554 | 0.0027 | 0.0226 | 0.0003 | 144 | 2 |
| 09GF-9 12 | 141  | 243  | 0.58 | 0.1727 | 0.0064 | 0.0252 | 0.0004 | 161 | 2 |
| 09GF-9 13 | 948  | 791  | 1.20 | 0.1560 | 0.0021 | 0.0225 | 0.0002 | 143 | 2 |
| 09GF-9 14 | 325  | 394  | 0.82 | 0.1567 | 0.0036 | 0.0224 | 0.0003 | 143 | 2 |
| 09GF-9 15 | 193  | 325  | 0.59 | 0.1526 | 0.0036 | 0.0227 | 0.0003 | 144 | 2 |



|             |     |      |      |        |        |        |        |     |     |
|-------------|-----|------|------|--------|--------|--------|--------|-----|-----|
| 09GF-9 16   | 61  | 126  | 0.49 | 0.1654 | 0.0112 | 0.0240 | 0.0006 | 153 | 3   |
| 09GF-9 17   | 112 | 186  | 0.60 | 0.1554 | 0.0071 | 0.0224 | 0.0004 | 143 | 2   |
| 09GF-9 18   | 46  | 104  | 0.44 | 0.1408 | 0.0070 | 0.0222 | 0.0004 | 141 | 2   |
| 09GF-9 19   | 139 | 244  | 0.57 | 0.1653 | 0.0048 | 0.0214 | 0.0003 | 137 | 2   |
| 09GF-9 20   | 148 | 232  | 0.64 | 0.1437 | 0.0044 | 0.0225 | 0.0003 | 144 | 2   |
| 09GF-9 21   | 62  | 132  | 0.47 | 0.1509 | 0.0065 | 0.0224 | 0.0004 | 143 | 2   |
| 09GF-9 22   | 94  | 116  | 0.81 | 0.1689 | 0.0128 | 0.0220 | 0.0004 | 140 | 3   |
| 09GF-9 23   | 136 | 253  | 0.54 | 0.1521 | 0.0042 | 0.0225 | 0.0003 | 143 | 2   |
| 09GF-9 24   | 220 | 299  | 0.73 | 0.1496 | 0.0050 | 0.0220 | 0.0003 | 140 | 2   |
| 09GF-21A 01 | 354 | 1011 | 0.35 | 0.155  | 2.04   | 0.024  | 1.53   | 150 | 2.3 |
| 09GF-21A 02 | 134 | 243  | 0.55 | 0.151  | 3.30   | 0.023  | 1.54   | 147 | 2.2 |
| 09GF-21A 03 | 70  | 169  | 0.41 | 0.155  | 3.39   | 0.023  | 1.50   | 149 | 2.2 |
| 09GF-21A 04 | 149 | 247  | 0.60 | 0.157  | 4.25   | 0.023  | 1.53   | 145 | 2.2 |
| 09GF-21A 05 | 185 | 293  | 0.63 | 0.150  | 3.33   | 0.023  | 1.53   | 146 | 2.2 |
| 09GF-21A 06 | 401 | 672  | 0.60 | 0.159  | 2.31   | 0.023  | 1.51   | 148 | 2.2 |
| 09GF-21A 07 | 76  | 248  | 0.31 | 0.163  | 3.97   | 0.025  | 1.57   | 157 | 2.4 |
| 09GF-21A 08 | 159 | 225  | 0.71 | 0.161  | 4.13   | 0.023  | 1.55   | 148 | 2.3 |
| 09GF-21A 09 | 709 | 1238 | 0.57 | 0.161  | 2.03   | 0.024  | 1.51   | 152 | 2.3 |
| 09GF-21A 10 | 504 | 769  | 0.66 | 0.158  | 2.24   | 0.023  | 1.51   | 148 | 2.2 |
| 09GF-21A 11 | 221 | 269  | 0.82 | 0.148  | 3.05   | 0.023  | 1.54   | 147 | 2.2 |
| 09GF-21A 12 | 222 | 349  | 0.64 | 0.164  | 3.51   | 0.024  | 1.51   | 152 | 2.3 |
| 09GF-21A 13 | 72  | 163  | 0.44 | 0.153  | 5.37   | 0.023  | 1.58   | 147 | 2.3 |
| 09GF-21A 14 | 265 | 445  | 0.60 | 0.156  | 4.59   | 0.023  | 1.67   | 148 | 2.5 |
| 09GF-21A 15 | 755 | 1760 | 0.43 | 0.160  | 2.13   | 0.024  | 1.51   | 151 | 2.2 |
| 09GF-21A 16 | 123 | 246  | 0.50 | 0.155  | 4.64   | 0.024  | 1.53   | 150 | 2.3 |
| 09GF-14A 01 | 447 | 577  | 0.78 | 0.147  | 3.04   | 0.022  | 1.53   | 140 | 2.1 |
| 09GF-14A 02 | 99  | 136  | 0.73 | 0.144  | 6.53   | 0.022  | 1.62   | 138 | 2.2 |
| 09GF-14A 03 | 468 | 609  | 0.77 | 0.146  | 3.68   | 0.021  | 1.51   | 136 | 2.0 |
| 09GF-14A 04 | 653 | 852  | 0.77 | 0.147  | 2.92   | 0.022  | 1.52   | 140 | 2.1 |
| 09GF-14A 05 | 297 | 428  | 0.69 | 0.144  | 3.44   | 0.022  | 1.53   | 139 | 2.1 |
| 09GF-14A 06 | 250 | 335  | 0.75 | 0.148  | 4.39   | 0.022  | 1.55   | 139 | 2.1 |
| 09GF-14A 07 | 431 | 544  | 0.79 | 0.144  | 3.47   | 0.022  | 1.51   | 139 | 2.1 |
| 09GF-14A 08 | 341 | 421  | 0.81 | 0.142  | 4.67   | 0.022  | 1.56   | 138 | 2.1 |
| 09GF-14A 09 | 406 | 515  | 0.79 | 0.146  | 2.79   | 0.022  | 1.50   | 141 | 2.1 |
| 09GF-14A 10 | 270 | 357  | 0.76 | 0.145  | 3.35   | 0.022  | 1.52   | 140 | 2.1 |
| 09GF-14A 11 | 324 | 500  | 0.65 | 0.144  | 4.02   | 0.022  | 1.53   | 141 | 2.1 |
| 09GF-14A 12 | 269 | 389  | 0.69 | 0.144  | 3.15   | 0.022  | 1.56   | 139 | 2.1 |
| 09GF-14A 13 | 404 | 512  | 0.79 | 0.146  | 3.30   | 0.022  | 1.58   | 140 | 2.2 |
| 09GF-14A 14 | 286 | 380  | 0.75 | 0.139  | 4.01   | 0.022  | 1.52   | 137 | 2.1 |
| 09GF-14A 15 | 657 | 752  | 0.87 | 0.150  | 3.18   | 0.022  | 1.52   | 142 | 2.1 |
| 09GF-14A 16 | 624 | 742  | 0.84 | 0.143  | 2.63   | 0.022  | 1.50   | 140 | 2.1 |
| 08JH153 22  | 333 | 119  | 2.79 | 0.1669 | 0.0061 | 0.0244 | 0.0005 | 155 | 3   |
| 08JH153 23  | 222 | 78   | 2.84 | 0.1707 | 0.0056 | 0.0246 | 0.0004 | 157 | 3   |
| 08JH153 24  | 441 | 144  | 3.07 | 0.1795 | 0.0054 | 0.0258 | 0.0004 | 164 | 3   |
| 08JH187 01  | 297 | 117  | 2.54 | 0.1482 | 0.0055 | 0.0218 | 0.0005 | 139 | 3   |
| 08JH187 02  | 588 | 305  | 1.93 | 0.1477 | 0.0037 | 0.0218 | 0.0004 | 139 | 3   |
| 08JH187 03  | 263 | 123  | 2.14 | 0.1577 | 0.0045 | 0.0229 | 0.0005 | 146 | 3   |
| 08JH187 04  | 561 | 218  | 2.57 | 0.1554 | 0.0041 | 0.0229 | 0.0005 | 146 | 3   |
| 08JH187 05  | 437 | 174  | 2.52 | 0.1547 | 0.0048 | 0.0237 | 0.0005 | 151 | 3   |
| 08JH187 06  | 274 | 224  | 1.22 | 0.1485 | 0.0063 | 0.0217 | 0.0005 | 138 | 3   |
| 08JH187 07  | 304 | 146  | 2.08 | 0.1560 | 0.0049 | 0.0232 | 0.0005 | 148 | 3   |
| 08JH187 08  | 223 | 108  | 2.06 | 0.1576 | 0.0090 | 0.0219 | 0.0007 | 140 | 4   |
| 08JH187 09  | 437 | 194  | 2.25 | 0.1510 | 0.0050 | 0.0221 | 0.0005 | 141 | 3   |
| 08JH187 10  | 618 | 319  | 1.94 | 0.1574 | 0.0037 | 0.0227 | 0.0004 | 144 | 3   |
| 08JH187 11  | 165 | 95   | 1.74 | 0.1634 | 0.0085 | 0.0233 | 0.0006 | 148 | 4   |
| 08JH187 12  | 325 | 165  | 1.97 | 0.1571 | 0.0125 | 0.0218 | 0.0006 | 139 | 4   |
| 08JH187 13  | 404 | 171  | 2.36 | 0.1746 | 0.0057 | 0.0242 | 0.0005 | 154 | 3   |
| 08JH187 14  | 192 | 104  | 1.84 | 0.1538 | 0.0058 | 0.0228 | 0.0005 | 145 | 3   |
| 08JH187 15  | 146 | 86   | 1.70 | 0.1580 | 0.0093 | 0.0219 | 0.0006 | 140 | 4   |
| 08JH187 16  | 351 | 151  | 2.33 | 0.1561 | 0.0054 | 0.0221 | 0.0005 | 141 | 3   |
| 08JH187 17  | 382 | 185  | 2.07 | 0.1463 | 0.0035 | 0.0217 | 0.0004 | 138 | 3   |
| 08JH187 18  | 233 | 140  | 1.66 | 0.1497 | 0.0060 | 0.0221 | 0.0005 | 141 | 3   |
| 08JH187 19  | 266 | 148  | 1.79 | 0.1646 | 0.0072 | 0.0242 | 0.0006 | 154 | 4   |
| 08JH187 20  | 513 | 191  | 2.69 | 0.1563 | 0.0044 | 0.0229 | 0.0005 | 146 | 3   |
| 08JH187 21  | 121 | 68   | 1.78 | 0.1563 | 0.0135 | 0.0220 | 0.0009 | 140 | 6   |
| 08JH187 22  | 317 | 177  | 1.79 | 0.1646 | 0.0067 | 0.0239 | 0.0006 | 152 | 4   |
| 08JH187 23  | 142 | 78   | 1.83 | 0.1590 | 0.0072 | 0.0234 | 0.0006 | 149 | 3   |
| 08JH187 24  | 690 | 270  | 2.56 | 0.1695 | 0.0046 | 0.0238 | 0.0005 | 152 | 3   |
| 08JH212 01  | 167 | 463  | 0.36 | 0.1829 | 0.0045 | 0.0262 | 0.0005 | 167 | 3   |
| 08JH212 02  | 162 | 409  | 0.39 | 0.1842 | 0.0099 | 0.0249 | 0.0007 | 159 | 5   |
| 08JH212 03  | 108 | 329  | 0.33 | 0.1826 | 0.0095 | 0.0260 | 0.0005 | 165 | 3   |
| 08JH212 04  | 120 | 341  | 0.35 | 0.1804 | 0.0044 | 0.0260 | 0.0005 | 166 | 3   |
| 08JH212 05  | 87  | 271  | 0.32 | 0.1875 | 0.0056 | 0.0257 | 0.0005 | 164 | 3   |
| 08JH212 06  | 232 | 454  | 0.51 | 0.1938 | 0.0041 | 0.0260 | 0.0005 | 166 | 3   |
| 08JH212 07  | 141 | 381  | 0.37 | 0.1800 | 0.0047 | 0.0260 | 0.0005 | 166 | 3   |
| 08JH212 08  | 179 | 515  | 0.35 | 0.1812 | 0.0051 | 0.0265 | 0.0006 | 168 | 3   |
| 08JH212 10  | 200 | 526  | 0.38 | 0.1747 | 0.0050 | 0.0256 | 0.0005 | 163 | 3   |
| 08JH212 11  | 151 | 449  | 0.34 | 0.1792 | 0.0040 | 0.0261 | 0.0005 | 166 | 3   |
| 08JH212 12  | 166 | 436  | 0.38 | 0.2283 | 0.0089 | 0.0275 | 0.0007 | 175 | 4   |
| 08JH212 13  | 136 | 398  | 0.34 | 0.1830 | 0.0083 | 0.0260 | 0.0005 | 166 | 3   |

|            |     |     |      |        |        |        |        |     |   |
|------------|-----|-----|------|--------|--------|--------|--------|-----|---|
| 08JH212 14 | 191 | 507 | 0.38 | 0.1760 | 0.0065 | 0.0253 | 0.0006 | 161 | 4 |
| 08JH212 15 | 195 | 530 | 0.37 | 0.1840 | 0.0093 | 0.0255 | 0.0005 | 162 | 3 |
| 08JH212 16 | 156 | 434 | 0.36 | 0.1636 | 0.0041 | 0.0256 | 0.0005 | 163 | 3 |
| 08JH212 17 | 197 | 454 | 0.43 | 0.1834 | 0.0062 | 0.0263 | 0.0006 | 167 | 4 |
| 08JH212 18 | 151 | 342 | 0.44 | 0.1866 | 0.0057 | 0.0259 | 0.0006 | 165 | 4 |
| 08JH212 21 | 169 | 453 | 0.37 | 0.1760 | 0.0050 | 0.0257 | 0.0005 | 163 | 3 |
| 08JH212 22 | 192 | 423 | 0.45 | 0.1873 | 0.0043 | 0.0259 | 0.0005 | 165 | 3 |
| 08JH212 23 | 147 | 407 | 0.36 | 0.1828 | 0.0082 | 0.0258 | 0.0005 | 164 | 3 |
| 08JH212 24 | 202 | 475 | 0.42 | 0.1794 | 0.0054 | 0.0258 | 0.0005 | 164 | 3 |

Notes: 1), Region numbers as marked in figure 1; 2), ratio of  $^{206}\text{Pb}/^{238}\text{U}$  versus  $^{207}\text{Pb}/^{235}\text{U}$  indicating concordance; 3) data with cross lines are zircons that are either discordant, or errors over 3-5%, or inherited.

## References cited

- Chen, C. H., Lee, C. Y., Lu, H. Y., and Hseh, P. S.: Generation of Late Cretaceous silicic rocks in SE China: Age, major element and numerical simulation constraints, *J. Asian Earth Sci.*, 31, 479-498, 2008.
- Duan, Z., Xing, G. F., Yu, M. G., Zhao, X. L., Jin, G. D., Chen, Z. H.: Time Sequence and Geological Process of Late Mesozoic Volcanic Activities in the Area of Zhejiang —Fujian Boundary, *Geol. Rev.* 59(3), 454-469 (in Chinese with English abstract), 2013.
- Guo, F., Fan, W., Li, C., Zhao, L., Li, H., and Yang, J.: Multi-stage crust–mantle interaction in SE China: temporal, thermal and compositional constraints from the Mesozoic felsic volcanic rocks in eastern Guangdong-Fujian provinces, *Lithos*, 150, 62-84, 2012.
- Li, C. L., Wang, Z. X., Wang, D. X., Cao, W. T., Yu, X. Q., Zhou, G. Z., and Gao, W. L.: Crust-mantle interaction triggered by oblique subduction of the Pacific plate: geochronological, geochemical, and Hf isotopic evidence from the Early Cretaceous volcanic rocks of Zhejiang Province, southeast China, *Intl. Geol. Rev.*, 56(14), 1732-1753, doi: 10. 1080/00206814.2014.956347, 2014.
- Li, L. M., Sun, M., Xing, G. F., Zhao, G. C., Zhou, M. F., Wong, J., and Chen, R.: Two late Mesozoic volcanic events in Fujian Province: constraints on the tectonic evolution of southeastern China, *Intl. Geol. Rev.*, 51, 216-251, 2009.
- Li, Y. N., Xing, G. F., Xing, X. L., Chen, S. Z., Duan, Z., Yang, D., and Hu, L. Y.: The discovery of Middle Jurassic volcanic rocks in northern Fujian Province and its geological significance, *Geol. Bull. China*, 34(12), 2227-2235 (in Chinese with English abstract), 2015.
- Liu, L., Xu, X. S., and Xia, Y.: Asynchronizing paleo-Pacific slab rollback beneath SE China: Insights from the episodic Late Mesozoic volcanism, *Gond. Res.*, 37, 397-407, 2016.
- Liu, L., Xu, X. S., and Zou, H. B. Episodic eruptions of the Late Mesozoic volcanic sequences in southeastern Zhejiang, SE China: petrogenesis and implications for the geodynamics of paleo-Pacific subduction, *Lithos*, 154, 166-180, 2012.
- Zhang, J. H., Yang, J. H., Chen, J. Y., Wu, F. Y., and Wilde, S. A.: Genesis of late Early Cretaceous high-silica rhyolites in eastern Zhejiang Province, southeast China: A crystal mush origin with mantle input, *Lithos*, 296-299, 482-495, 2018.
