# Supplementary material for: Temporospatial variation in the late Mesozoic volcanism in southeast China
Source: Copernicus journal article supplement (doi:10.5194/se-10-2089-2019), 2019-11-22
Supplement: Supplementary file 3 [file se-10-2089-2019-supplement.zip]

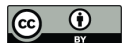

## *Supplement of*

# **Temporospatial variation in the late Mesozoic volcanism in southeast China**

**Xianghui Li et al.**

*Correspondence to:* Xianghui Li (leeschhui@126.com)

- se-10-2089-2019-supplement-title-page.pdf
- Supplement figures.pdf
- Supplement tables.pdf

The copyright of individual parts of the supplement might differ from the CC BY 4.0 License.
